# Supplementary material for: TMT-based quantitative proteomics analysis reveals the effect of bovine derived MFG-E8 against oxidative stress on rat L6 cells
Source: Royal Society of Chemistry journal article supplement (doi:10.1039/d1fo01135a), 2021-01-01
Supplement: d1fo01135a1.xlsx [file d1fo01135a1.xlsx]

## Sheet: Sheet1
Accession	Description	Score	Coverage	# Proteins	# Unique Peptides	# Peptides	# PSMs	126/(126+127_N+127_C+128_N+128_C+129_N+129_C+130_N+130_C)	126/(126+127_N+127_C+128_N+128_C+129_N+129_C+130_N+130_C) Count	126/(126+127_N+127_C+128_N+128_C+129_N+129_C+130_N+130_C) Variability [%]	127_N/(126+127_N+127_C+128_N+128_C+129_N+129_C+130_N+130_C)	127_N/(126+127_N+127_C+128_N+128_C+129_N+129_C+130_N+130_C) Count	127_N/(126+127_N+127_C+128_N+128_C+129_N+129_C+130_N+130_C) Variability [%]	128_C/(126+127_N+127_C+128_N+128_C+129_N+129_C+130_N+130_C)	128_C/(126+127_N+127_C+128_N+128_C+129_N+129_C+130_N+130_C) Count	128_C/(126+127_N+127_C+128_N+128_C+129_N+129_C+130_N+130_C) Variability [%]	128_N/(126+127_N+127_C+128_N+128_C+129_N+129_C+130_N+130_C)	128_N/(126+127_N+127_C+128_N+128_C+129_N+129_C+130_N+130_C) Count	128_N/(126+127_N+127_C+128_N+128_C+129_N+129_C+130_N+130_C) Variability [%]	129_C/(126+127_N+127_C+128_N+128_C+129_N+129_C+130_N+130_C)	129_C/(126+127_N+127_C+128_N+128_C+129_N+129_C+130_N+130_C) Count	129_C/(126+127_N+127_C+128_N+128_C+129_N+129_C+130_N+130_C) Variability [%]	129_N/(126+127_N+127_C+128_N+128_C+129_N+129_C+130_N+130_C)	129_N/(126+127_N+127_C+128_N+128_C+129_N+129_C+130_N+130_C) Count	129_N/(126+127_N+127_C+128_N+128_C+129_N+129_C+130_N+130_C) Variability [%]	130_C/(126+127_N+127_C+128_N+128_C+129_N+129_C+130_N+130_C)	130_C/(126+127_N+127_C+128_N+128_C+129_N+129_C+130_N+130_C) Count	130_C/(126+127_N+127_C+128_N+128_C+129_N+129_C+130_N+130_C) Variability [%]	130_N/(126+127_N+127_C+128_N+128_C+129_N+129_C+130_N+130_C)	130_N/(126+127_N+127_C+128_N+128_C+129_N+129_C+130_N+130_C) Count	130_N/(126+127_N+127_C+128_N+128_C+129_N+129_C+130_N+130_C) Variability [%]	127_C/(126+127_N+127_C+128_N+128_C+129_N+129_C+130_N+130_C)	127_C/(126+127_N+127_C+128_N+128_C+129_N+129_C+130_N+130_C) Count	127_C/(126+127_N+127_C+128_N+128_C+129_N+129_C+130_N+130_C) Variability [%]	# AAs	MW [kDa]	calc. pI
A0A0G2JUA5	AHNAK nucleoprotein OS=Rattus norvegicus OX=10116 GN=Ahnak PE=1 SV=1 - [A0A0G2JUA5_RAT]	18099	72.81	17	157	190	725	1.17009	545	8.67249	1.19933	545	8.96837	0.927282	545	4.70294	0.948266	545	3.41824	0.930206	545	7.04571	0.949012	545	4.94633	0.925203	545	7.73673	0.911872	545	8.1611	1.20076	545	9.95503	5450	580.754	6.13818
Q6S3A0	Plectin OS=Rattus norvegicus OX=10116 GN=Plec PE=1 SV=1 - [Q6S3A0_RAT]	9865.67	49.89	101	239	260	489	1.03439	460	7.63295	1.03741	461	8.53224	0.986281	461	5.24573	0.997553	461	3.8238	0.998508	461	7.21031	0.989241	461	5.43796	0.978809	461	7.56023	0.98133	461	7.42851	1.01549	461	10.7056	4688	533.498	5.90967
G3V6P7	Myosin, heavy polypeptide 9, non-muscle OS=Rattus norvegicus OX=10116 GN=Myh9 PE=1 SV=1 - [G3V6P7_RAT]	8689.74	52.55	89	98	139	407	0.982714	316	6.66641	0.989119	316	7.849	1.01373	316	4.45165	1.02817	316	4.68866	1.01122	316	7.46949	1.01493	316	4.74519	0.98537	316	8.26513	0.980065	316	7.39553	0.991706	316	8.94915	1960	226.273	5.65576
C0JPT7	Filamin A OS=Rattus norvegicus OX=10116 GN=Flna PE=1 SV=1 - [C0JPT7_RAT]	7355.06	45.93	5	95	108	258	0.983701	236	6.35328	0.984181	236	7.67089	0.999168	236	5.16055	1.02412	236	4.40192	1.00368	236	7.03526	1.02219	236	5.67617	0.991404	236	7.85776	1.00096	236	7.05593	0.990611	236	8.59537	2639	280.32	6.03662
P31000	Vimentin OS=Rattus norvegicus OX=10116 GN=Vim PE=1 SV=2 - [VIME_RAT]	5500.07	82.62	59	38	42	247	1.05235	237	8.42824	1.06176	237	9.18536	0.970192	237	4.89895	0.976063	237	5.01983	1.00099	237	8.30766	0.977645	237	7.13571	0.993916	237	9.27228	0.981692	237	8.789	1.04099	237	11.9332	466	53.7	5.12256
P60711	Actin, cytoplasmic 1 OS=Rattus norvegicus OX=10116 GN=Actb PE=1 SV=1 - [ACTB_RAT]	5254.83	58.13	13	7	20	183	1.04989	70	8.13044	1.08409	70	7.1942	0.936535	70	4.80447	1.00645	70	5.65858	0.951888	70	7.23747	1.02028	70	6.09146	0.965065	70	8.025	0.953352	70	8.39698	1.10575	70	10.2059	375	41.7097	5.47803
A0A0H2UHR7	Filamin-C OS=Rattus norvegicus OX=10116 GN=Flnc PE=1 SV=1 - [A0A0H2UHR7_RAT]	4604.85	31.71	7	60	75	149	1.04606	113	7.40062	1.05409	113	7.65111	0.9699	113	4.37612	0.985122	113	3.55602	0.988951	113	6.5153	0.981469	113	5.07267	0.992666	113	7.13864	0.98863	113	6.88225	1.05891	113	8.18072	2693	287.122	5.90967
Q9QXQ0	Alpha-actinin-4 OS=Rattus norvegicus OX=10116 GN=Actn4 PE=1 SV=2 - [ACTN4_RAT]	4378.9	52.58	41	31	48	167	1.00038	116	6.37671	1.01071	116	7.19594	0.983859	116	6.19192	1.00621	116	4.68797	0.992814	116	6.59523	1.0137	116	6.161	0.983967	116	7.71019	0.978358	116	7.34778	1.02546	116	11.3721	911	104.849	5.43994
P82995	Heat shock protein HSP 90-alpha OS=Rattus norvegicus OX=10116 GN=Hsp90aa1 PE=1 SV=3 - [HS90A_RAT]	3982.09	49.93	21	26	48	178	1.05975	86	8.72668	1.05637	86	7.16516	0.983682	86	5.65725	1.0077	86	4.72183	0.965567	86	8.74985	1.00067	86	5.87814	0.935839	86	8.42004	0.962559	86	9.48536	1.07783	86	10.4657	733	84.7618	5.0083
G3V8L3	Lamin A, isoform CRA_b OS=Rattus norvegicus OX=10116 GN=Lmna PE=1 SV=1 - [G3V8L3_RAT]	3969.76	62.26	19	42	48	138	1.09575	125	11.7113	1.09229	125	12.2612	0.95797	125	6.01701	0.961287	125	5.07443	0.988582	125	9.26553	0.951148	125	6.21543	0.993274	125	8.91445	0.974219	125	9.21066	1.07306	125	13.0659	665	74.2667	6.97607
P34058	Heat shock protein HSP 90-beta OS=Rattus norvegicus OX=10116 GN=Hsp90ab1 PE=1 SV=4 - [HS90B_RAT]	3902.95	55.94	23	24	49	178	1.01389	74	9.47928	1.03687	74	8.81877	0.99376	74	7.09652	1.02513	74	4.90531	1.00509	74	8.4983	1.01856	74	7.29228	0.95792	74	10.1371	0.965686	74	9.0087	1.02183	74	10.5965	724	83.2291	5.03369
P85972	Vinculin OS=Rattus norvegicus OX=10116 GN=Vcl PE=1 SV=1 - [VINC_RAT]	3295.79	60.41	6	64	66	137	1.12113	133	8.61691	1.1395	133	10.7872	0.9579	133	5.40821	0.953961	133	5.16795	0.964318	133	6.20422	0.954266	133	7.35842	0.964488	133	8.2307	0.955779	133	8.37904	1.12007	133	10.0881	1066	116.542	6.0874
M0R5J4	2-phospho-D-glycerate hydro-lyase OS=Rattus norvegicus OX=10116 PE=3 SV=1 - [M0R5J4_RAT]	3163.32	56.22	20	17	25	116	0.943454	70	6.75168	0.964374	70	8.14669	1.01283	70	4.03052	1.04424	70	4.05882	1.00104	70	6.96811	1.05378	70	6.04963	0.991739	70	6.56294	0.98436	70	7.52992	0.975362	70	9.95932	434	47.0452	6.3667
P11883	Aldehyde dehydrogenase, dimeric NADP-preferring OS=Rattus norvegicus OX=10116 GN=Aldh3a1 PE=1 SV=3 - [AL3A1_RAT]	3007.54	41.28	6	19	22	145	1.10556	128	8.62775	1.16315	128	9.58011	0.953059	128	7.31759	1.00391	128	3.66554	0.899794	128	8.41091	1.00546	128	7.37381	0.891154	128	11.3936	0.89665	128	9.7806	1.16793	128	14.3026	453	50.3067	6.80029
F1LRT9	Cytoplasmic dynein 1 heavy chain 1 OS=Rattus norvegicus OX=10116 GN=Dync1h1 PE=1 SV=3 - [F1LRT9_RAT]	2864.93	21.11	31	96	101	151	0.966689	141	6.99689	0.963579	141	6.77517	1.01476	141	4.47072	1.01864	141	5.1057	1.00971	141	6.29649	1.02576	141	5.13633	0.995787	141	7.33594	1.01328	141	5.34985	0.963447	141	10.0482	4643	531.472	6.37939
G3V852	RCG55135, isoform CRA_b OS=Rattus norvegicus OX=10116 GN=Tln1 PE=1 SV=1 - [G3V852_RAT]	2841.97	28.14	6	48	66	102	1.07839	77	8.36725	1.05853	77	8.09961	0.996253	77	5.61128	0.983087	77	4.01988	0.959836	77	7.82539	1.00045	77	4.75253	0.975633	77	7.33788	0.97284	77	6.26497	1.0843	77	11.4905	2541	269.504	6.20166
F1LUD3	Uncharacterized protein OS=Rattus norvegicus OX=10116 PE=1 SV=2 - [F1LUD3_RAT]	2826.77	33.73	11	56	57	105	0.986853	101	5.86381	1.00138	101	5.25376	0.97821	101	3.35661	1.0053	101	3.24506	0.9941	101	4.34006	1.01166	101	5.30207	0.988687	101	5.83334	1.00612	101	5.11915	1.03427	101	6.46816	5582	584.77	5.59229
Q6GMN8	Alpha-actinin cytoskeletal isoform OS=Rattus norvegicus OX=10116 GN=Actn1 PE=1 SV=1 - [Q6GMN8_RAT]	2785.83	41.83	27	21	38	103	1.00358	52	4.79965	0.996216	52	5.41214	0.990503	52	4.07208	1.02875	52	2.52083	0.985853	52	4.50685	1.02464	52	3.20465	0.978202	52	6.02429	0.984832	52	5.59601	1.02973	52	6.12329	887	102.547	5.47803
P05197	Elongation factor 2 OS=Rattus norvegicus OX=10116 GN=Eef2 PE=1 SV=4 - [EF2_RAT]	2746.04	44.06	8	38	42	163	0.987522	154	6.59178	1.00341	154	6.65006	1.00216	154	5.49081	1.0316	154	4.52144	1.00183	154	8.15497	1.02882	154	5.7918	0.978108	154	8.24323	0.98779	154	7.33239	0.989911	154	10.0872	858	95.2229	6.82959
P68035	Actin, alpha cardiac muscle 1 OS=Rattus norvegicus OX=10116 GN=Actc1 PE=2 SV=1 - [ACTC_RAT]	2737.9	50.93	10	2	18	155	1.22971	3	11.2364	1.21511	3	5.43164	0.874377	3	5.4755	0.919207	3	7.57986	0.908393	3	4.49834	0.909467	3	0.57525	0.926301	3	8.05325	0.895673	3	3.96986	1.2774	3	3.24949	377	41.9919	5.38916
P11980	Pyruvate kinase PKM OS=Rattus norvegicus OX=10116 GN=Pkm PE=1 SV=3 - [KPYM_RAT]	2597.14	56.69	15	3	35	120	0.99164	17	7.44011	1.01768	17	4.95251	0.986769	17	5.39443	1.03298	17	3.58128	0.996275	17	6.4536	1.03748	17	4.6655	0.981173	17	7.99201	0.987307	17	7.80354	1.02698	17	9.99871	531	57.7809	7.06396
P68136	Actin, alpha skeletal muscle OS=Rattus norvegicus OX=10116 GN=Acta1 PE=1 SV=1 - [ACTS_RAT]	2527.96	50.66	7	1	17	153	1.09072	1		1.05513	1		0.942046	1		1.01846	1		0.996154	1		1.00023	1		0.938924	1		0.933532	1		1.11444	1		377	42.0239	5.38916
D4A8D5	Filamin B OS=Rattus norvegicus OX=10116 GN=Flnb PE=1 SV=1 - [D4A8D5_RAT]	2453.98	21.33	5	39	47	80	0.947695	55	6.26239	0.964557	55	6.31073	1.01848	55	3.49099	1.06061	55	4.63575	0.969973	55	5.82497	1.07017	55	4.83432	0.967518	55	6.81553	0.983445	55	7.64122	0.968181	55	7.12618	2578	275.144	5.73193
P06761	Endoplasmic reticulum chaperone BiP OS=Rattus norvegicus OX=10116 GN=Hspa5 PE=1 SV=1 - [BIP_RAT]	2411.1	53.36	3	32	36	104	0.970151	97	7.86871	0.964089	97	6.36282	1.02248	97	3.13839	1.04217	97	4.57307	1.01652	97	6.41788	1.03241	97	5.14107	0.994709	97	7.67925	0.986041	97	4.5254	0.955525	97	8.0925	654	72.3024	5.16064
P12785	Fatty acid synthase OS=Rattus norvegicus OX=10116 GN=Fasn PE=1 SV=3 - [FAS_RAT]	2338.3	24.55	11	54	57	97	1.16337	91	9.08341	1.18016	91	8.5036	0.93456	91	6.08075	0.938328	91	4.82162	0.960993	91	6.09513	0.945173	91	5.23227	0.944099	91	8.39027	0.949714	91	6.4637	1.14247	91	9.39613	2505	272.478	6.39209
P63039	60 kDa heat shock protein, mitochondrial OS=Rattus norvegicus OX=10116 GN=Hspd1 PE=1 SV=1 - [CH60_RAT]	2268.7	49.21	14	26	27	78	0.998236	77	8.06773	0.988838	77	8.12404	1.00409	77	3.77376	1.00544	77	4.9106	1.01603	77	5.34765	0.988344	77	6.82727	0.992535	77	8.57415	0.995748	77	6.63098	0.997094	77	9.68515	573	60.9174	6.17627
Q6P7S0	Pyruvate kinase OS=Rattus norvegicus OX=10116 PE=2 SV=1 - [Q6P7S0_RAT]	2222.29	56.88	14	1	33	106	1.05504	3	1.23615	1.04303	3	3.48932	1.02789	3	1.03393	0.961497	3	6.7586	1.03677	3	9.78151	0.936289	3	0.855157	1.02637	3	9.26831	0.962779	3	0.857019	0.989732	3	1.87734	487	52.9024	7.82568
F1M853	Ribosome-binding protein 1 OS=Rattus norvegicus OX=10116 GN=Rrbp1 PE=1 SV=3 - [F1M853_RAT]	2180.66	61.67	33	79	82	118	1.10413	115	9.83177	1.12603	115	8.93436	0.937128	115	5.82763	0.95633	115	5.6109	1.00936	115	8.97061	0.933551	115	8.20805	0.974481	115	7.71517	0.976317	115	7.80662	1.11934	115	11.2021	1453	157.409	9.0708
M0R660	Glyceraldehyde-3-phosphate dehydrogenase OS=Rattus norvegicus OX=10116 PE=1 SV=1 - [M0R660_RAT]	2123.76	51.95	14	2	18	75	1.06975	10	10.1499	1.13542	10	5.56484	1.00971	10	3.49447	1.05902	10	3.75877	0.85135	10	5.65766	1.07826	10	9.35673	0.855681	10	9.07282	0.829972	10	9.71109	1.11797	10	6.06993	333	35.7601	8.25049
Q6IRK8	Spectrin alpha chain, non-erythrocytic 1 OS=Rattus norvegicus OX=10116 GN=Sptan1 PE=1 SV=1 - [Q6IRK8_RAT]	2069.43	28.92	11	62	65	100	1.06677	97	8.77841	1.05622	97	9.19472	0.981815	97	5.23481	0.978017	97	4.25032	1.00257	97	6.2389	0.956002	97	7.38391	1.00146	97	9.06824	0.994215	97	9.39266	1.04819	97	11.1133	2452	282.206	5.31299
P07150	Annexin A1 OS=Rattus norvegicus OX=10116 GN=Anxa1 PE=1 SV=2 - [ANXA1_RAT]	2052.79	64.16	8	22	24	89	1.18529	82	10.1065	1.23031	82	10.958	0.931508	82	6.49732	0.948526	82	5.54351	0.900458	82	14.9645	0.955145	82	10.4342	0.887578	82	16.2072	0.895114	82	12.5854	1.23289	82	17.101	346	38.8049	7.34229
P63018	Heat shock cognate 71 kDa protein OS=Rattus norvegicus OX=10116 GN=Hspa8 PE=1 SV=1 - [HSP7C_RAT]	2051.87	45.67	22	25	32	101	1.05846	85	8.55675	1.06718	85	8.0512	0.970706	85	5.59324	0.969583	85	4.82263	0.98513	85	10.394	0.969457	85	4.53088	0.979833	85	11.3613	0.969664	85	9.18158	1.06353	85	9.72415	646	70.8272	5.51611
P04797	Glyceraldehyde-3-phosphate dehydrogenase OS=Rattus norvegicus OX=10116 GN=Gapdh PE=1 SV=3 - [G3P_RAT]	2045.29	53.75	28	2	18	70	0.980419	5	5.39737	1.00811	5	2.25857	0.860206	5	0.929563	0.93084	5	2.19697	1.13756	5	1.55362	0.890176	5	2.46614	1.14261	5	4.30673	1.11171	5	3.4346	1.03864	5	3.72802	333	35.8052	8.03076
A0A0A0MY09	Endoplasmin OS=Rattus norvegicus OX=10116 GN=Hsp90b1 PE=1 SV=1 - [A0A0A0MY09_RAT]	1956.6	40.92	10	37	41	99	1.10411	88	10.6289	1.11201	88	9.91916	0.967932	88	5.74995	0.975754	88	4.00605	0.958774	88	5.96393	0.984946	88	4.95178	0.961113	88	8.94904	0.953773	88	7.38538	1.09149	88	11.9938	804	92.8424	4.80518
P69897	Tubulin beta-5 chain OS=Rattus norvegicus OX=10116 GN=Tubb5 PE=1 SV=1 - [TBB5_RAT]	1923.43	34.46	3	1	15	65	1.16363	4	3.68409	1.21899	4	4.04436	0.940604	4	2.052	0.977561	4	3.62564	0.905917	4	4.89489	1.02729	4	3.20885	0.872921	4	3.30709	0.890621	4	3.06252	1.1487	4	3.27572	444	49.639	4.89404
P68370	Tubulin alpha-1A chain OS=Rattus norvegicus OX=10116 GN=Tuba1a PE=1 SV=1 - [TBA1A_RAT]	1902.17	45.01	5	1	16	80	1.0678	3	5.8435	1.09685	3	2.22735	0.962864	3	0.387888	0.976599	3	2.27354	1.01386	3	1.5558	0.984261	3	2.18583	0.97831	3	2.3479	0.92978	3	2.93863	1.13642	3	9.59456	451	50.1036	5.05908
Q5RJR9	Collagen-binding protein OS=Rattus norvegicus OX=10116 GN=Serpinh1 PE=1 SV=1 - [Q5RJR9_RAT]	1862.21	39.57	8	1	20	85	1.05927	8	4.71461	1.07261	8	5.19197	0.986718	8	5.41141	0.978023	8	6.48751	0.962525	8	5.58035	0.959689	8	4.98178	0.964899	8	7.2997	1.02268	8	6.19798	1.03945	8	9.90714	417	46.5322	8.82178
F1M953	75 kDa glucose-regulated protein OS=Rattus norvegicus OX=10116 GN=Hspa9 PE=1 SV=1 - [F1M953_RAT]	1856.59	47.42	27	32	35	83	0.720347	78	15.7753	0.744512	78	14.2364	1.10707	78	5.64477	1.09923	78	9.29996	1.08643	78	8.79732	1.12492	78	7.01931	1.07747	78	7.59464	1.07428	78	7.75186	0.739484	78	17.0761	679	73.6988	6.16357
P62982	Ubiquitin-40S ribosomal protein S27a OS=Rattus norvegicus OX=10116 GN=Rps27a PE=1 SV=2 - [RS27A_RAT]	1828.97	76.28	20	4	15	109	1.0335	11	8.40125	1.07553	11	6.21168	1.00368	11	3.11296	1.03136	11	7.61718	0.907004	11	8.02869	1.03605	11	1.82816	0.939428	11	9.4456	0.901274	11	10.5992	1.04981	11	6.40955	156	17.9395	9.64209
Q6P9T8	Tubulin beta-4B chain OS=Rattus norvegicus OX=10116 GN=Tubb4b PE=1 SV=1 - [TBB4B_RAT]	1818.18	37.75	5	2	16	66	1.13317	8	10.3674	1.16876	8	12.3884	0.935583	8	10.1911	0.967231	8	3.05807	0.930807	8	9.89703	0.968917	8	5.22263	0.925917	8	13.0647	0.930966	8	12.7983	1.12601	8	17.3802	445	49.769	4.89404
P85108	Tubulin beta-2A chain OS=Rattus norvegicus OX=10116 GN=Tubb2a PE=1 SV=1 - [TBB2A_RAT]	1791.03	32.36	4	1	14	61	1.18334	4	3.53189	1.1537	4	5.799	0.880122	4	0.900729	0.978423	4	1.86054	0.926645	4	2.96488	0.976061	4	5.02417	0.902062	4	3.48242	0.942573	4	6.0534	1.22249	4	4.1309	445	49.875	4.89404
A0A0G2JZI2	Glutamyl-tRNA synthetase OS=Rattus norvegicus OX=10116 GN=Eprs PE=1 SV=1 - [A0A0G2JZI2_RAT]	1772.41	35.85	11	51	52	80	0.794168	78	13.409	0.811575	78	12.3448	1.06522	78	5.55813	1.09214	78	4.89384	1.07055	78	5.82967	1.10156	78	6.17301	1.06076	78	6.26436	1.05234	78	6.13874	0.812783	78	12.0727	1512	169.753	7.44482
P10860	Glutamate dehydrogenase 1, mitochondrial OS=Rattus norvegicus OX=10116 GN=Glud1 PE=1 SV=2 - [DHE3_RAT]	1757.27	41.94	2	26	26	64	1.01153	64	8.22193	0.985968	64	6.58686	1.00174	64	5.01762	1.0113	64	4.55733	0.993916	64	6.72901	1.01999	64	5.56818	0.98903	64	8.89737	0.994604	64	5.70773	0.995274	64	10.2553	558	61.3773	8.00146
Q07936	Annexin A2 OS=Rattus norvegicus OX=10116 GN=Anxa2 PE=1 SV=2 - [ANXA2_RAT]	1737.81	58.11	4	21	25	81	1.03018	72	7.58092	1.0324	72	7.31772	0.999813	72	3.75892	1.02568	72	5.14862	0.960363	72	8.52967	1.0191	72	7.68894	0.954088	72	8.84809	0.948422	72	8.54696	1.03375	72	9.20427	339	38.6538	7.69385
Q9Z2L0	Voltage-dependent anion-selective channel protein 1 OS=Rattus norvegicus OX=10116 GN=Vdac1 PE=1 SV=4 - [VDAC1_RAT]	1717.4	66.08	1	13	14	47	0.970169	45	9.11611	1.00615	45	8.34859	0.982054	45	6.72771	0.995653	45	6.48836	0.995172	45	11.0363	1.02201	45	7.85614	0.997661	45	9.66729	0.990517	45	6.86442	0.989345	45	11.5468	283	30.7366	8.54346
P29457	Serpin H1 OS=Rattus norvegicus OX=10116 GN=Serpinh1 PE=1 SV=1 - [SERPH_RAT]	1676.43	39.09	8	1	20	82	1.95594	5	7.23801	1.97148	5	8.99162	0.673577	5	12.6816	0.627941	5	7.38922	0.598806	5	3.68754	0.63269	5	17.5706	0.645676	5	13.0726	0.618966	5	10.2991	2.05848	5	3.05099	417	46.4882	8.82178
Q5XIF6	Tubulin alpha-4A chain OS=Rattus norvegicus OX=10116 GN=Tuba4a PE=1 SV=1 - [TBA4A_RAT]	1666.59	35.04	3	1	13	68	1.0375	2	2.94512	1.00191	2	2.25936	0.977857	2	1.09951	1.01436	2	2.03901	0.973555	2	3.08107	1.01704	2	2.66193	1.00365	2	3.88007	0.997598	2	2.39154	1.01584	2	1.63867	448	49.8924	5.05908
P46462	Transitional endoplasmic reticulum ATPase OS=Rattus norvegicus OX=10116 GN=Vcp PE=1 SV=3 - [TERA_RAT]	1653.67	41.19	12	28	29	71	1.04351	69	6.55645	1.04585	69	7.12321	0.987451	69	4.55451	1.01166	69	4.10793	0.958777	69	5.78926	1.02761	69	3.66297	0.948361	69	8.08557	0.953422	69	6.29341	1.05626	69	9.46031	806	89.2927	5.26221
P15865	Histone H1.4 OS=Rattus norvegicus OX=10116 GN=H1-4 PE=1 SV=3 - [H14_RAT]	1644.96	68.49	11	8	24	121	1.14074	27	7.60056	1.18298	27	6.00749	0.948522	27	5.20719	1.02177	27	7.79362	0.893824	27	6.30604	0.95654	27	10.8631	0.903244	27	7.99219	0.896377	27	7.2001	1.14251	27	12.3397	219	21.974	11.1069
D4ACN7	Myoferlin OS=Rattus norvegicus OX=10116 GN=Myof PE=1 SV=2 - [D4ACN7_RAT]	1636.91	25.15	6	45	45	71	1.0267	69	5.5106	1.02453	69	6.70516	0.990088	69	3.72986	1.01319	69	4.3487	0.958558	69	5.36788	1.01896	69	4.0117	0.970793	69	6.16817	0.976227	69	7.60773	1.04038	69	8.57136	2048	233.239	6.11279
G3V7Q7	IQ motif containing GTPase activating protein 1 (Predicted), isoform CRA_b OS=Rattus norvegicus OX=10116 GN=Iqgap1 PE=1 SV=1 - [G3V7Q7_RAT]	1615.59	24.14	3	36	40	67	0.989501	61	7.53898	0.997963	61	6.37454	1.01892	61	5.85416	1.04025	61	4.5967	0.973836	61	5.60635	1.04014	61	5.39543	0.975172	61	6.66154	0.977953	61	5.06729	1.00642	61	7.48839	1657	188.714	6.43018
M0R7B4	H1.3 linker histone, cluster member OS=Rattus norvegicus OX=10116 GN=Hist1h1d PE=1 SV=2 - [M0R7B4_RAT]	1594.36	66.36	5	10	23	95	1.20512	32	13.8363	1.18457	32	11.9307	0.936951	32	10.5127	0.946186	32	7.72698	0.92428	32	8.79935	0.903404	32	6.43969	0.897426	32	10.7738	0.862814	32	16.408	1.19663	32	12.4573	220	22.2202	11.1069
Q38PG1	AHNAK 1 (Fragment) OS=Rattus norvegicus OX=10116 PE=2 SV=1 - [Q38PG1_RAT]	1592.1	43.28	5	5	25	93	1.20193	14	8.473	1.22735	14	7.64205	0.925118	14	5.57111	0.94481	14	1.75005	0.926042	14	8.39939	0.92921	14	1.8964	0.89748	14	8.21733	0.906881	14	4.84113	1.22384	14	10.0372	543	58.7293	5.45264
A0A0G2K654	H1.2 linker histone, cluster member OS=Rattus norvegicus OX=10116 GN=Hist1h1c PE=1 SV=1 - [A0A0G2K654_RAT]	1591.63	55.19	16	5	20	102	1.11506	21	8.92363	1.1563	21	7.86648	0.97198	21	3.82529	0.978214	21	4.2154	0.965331	21	4.80692	0.955882	21	5.78808	0.94294	21	9.05136	0.928581	21	10.1929	1.13294	21	7.01856	212	21.3037	11.0044
D4ACB8	CCT-theta OS=Rattus norvegicus OX=10116 GN=Cct8 PE=1 SV=1 - [D4ACB8_RAT]	1583.29	45.99	1	25	25	54	0.942181	54	6.76378	0.964037	54	4.23215	1.02467	54	3.03167	1.04632	54	2.85524	0.999621	54	4.47372	1.04652	54	5.34086	1.00452	54	5.98008	1.01381	54	5.09639	0.939267	54	9.16619	548	59.5505	5.5415
G3V8F8	Nestin OS=Rattus norvegicus OX=10116 GN=Nes PE=1 SV=1 - [G3V8F8_RAT]	1580.85	27.15	3	39	39	52	1.38219	52	9.83203	1.39902	52	9.51859	0.844436	52	8.0182	0.854559	52	5.13701	0.898232	52	8.42704	0.845172	52	7.04321	0.886303	52	8.31284	0.886759	52	7.81266	1.36485	52	8.26215	1893	208.788	4.32275
G3V6D3	ATP synthase subunit beta OS=Rattus norvegicus OX=10116 GN=Atp5f1b PE=1 SV=1 - [G3V6D3_RAT]	1578.09	29.49	5	13	13	43	0.956263	43	6.61758	0.978861	43	8.36517	1.02137	43	5.78699	0.999669	43	6.06657	1.00558	43	7.94882	1.02969	43	7.61912	1.012	43	11.7876	1.0272	43	6.83043	0.927094	43	9.95646	529	56.3095	5.2749
P62986	Ubiquitin-60S ribosomal protein L40 OS=Rattus norvegicus OX=10116 GN=Uba52 PE=1 SV=2 - [RL40_RAT]	1568.52	74.22	18	2	14	103	1.00703	3	2.04925	1.07574	3	0.804658	1.00775	3	5.51309	0.979871	3	1.20394	1.03784	3	0.926386	0.983146	3	3.26327	1.00501	3	7.82085	0.903423	3	1.87851	0.959058	3	2.31149	128	14.719	9.83252
A0A1W2Q6E9	Moesin OS=Rattus norvegicus OX=10116 GN=Msn PE=1 SV=1 - [A0A1W2Q6E9_RAT]	1565.65	48.78	25	26	39	101	0.988294	70	7.74824	0.994459	70	9.25882	1.01322	70	4.54955	1.00384	70	4.92352	1.0089	70	6.50882	1.01132	70	6.20455	0.989559	70	8.95319	1.00993	70	7.80545	0.988612	70	10.9142	576	67.6098	6.46826
M0R757	Elongation factor 1-alpha OS=Rattus norvegicus OX=10116 GN=LOC100360413 PE=3 SV=1 - [M0R757_RAT]	1548.68	43.51	11	22	23	121	1.00932	120	7.16385	1.00889	120	7.47642	0.995508	120	4.97479	1.02312	120	3.8383	0.984009	120	8.52991	1.00698	120	5.58074	0.98857	120	9.48573	0.975296	120	7.65988	1.00867	120	11.4403	462	50.0761	9.01221
P04636	Malate dehydrogenase, mitochondrial OS=Rattus norvegicus OX=10116 GN=Mdh2 PE=1 SV=2 - [MDHM_RAT]	1543.72	54.44	5	17	17	52	0.963486	52	6.92659	0.979309	52	6.84399	1.01561	52	5.18105	1.04101	52	4.46627	0.988222	52	6.17571	1.05899	52	5.64208	0.967359	52	5.96196	0.978229	52	5.30592	0.988665	52	9.9999	338	35.6608	8.67529
D3ZDT1	Erythrocyte membrane protein band 4.1-like 2 OS=Rattus norvegicus OX=10116 GN=Epb41l2 PE=1 SV=3 - [D3ZDT1_RAT]	1524.56	35.42	25	28	29	47	1.11973	46	8.35055	1.12728	46	11.1555	0.9357	46	6.01989	0.966145	46	6.38323	0.961573	46	8.82045	0.95511	46	4.61161	0.94926	46	9.71887	0.934162	46	9.4206	1.14865	46	12.0918	926	102.532	5.35107
P15429	Beta-enolase OS=Rattus norvegicus OX=10116 GN=Eno3 PE=1 SV=3 - [ENOB_RAT]	1516.44	33.18	1	6	15	55	1.24645	8	2.58243	1.24344	8	4.27408	0.942657	8	4.71809	0.909268	8	4.72381	0.955603	8	6.05985	0.913486	8	8.22612	0.931262	8	7.45176	0.958319	8	6.64479	1.164	8	9.68859	434	46.9843	7.44482
G3V9Y1	Myosin, heavy polypeptide 10, non-muscle, isoform CRA_b OS=Rattus norvegicus OX=10116 GN=Myh10 PE=1 SV=1 - [G3V9Y1_RAT]	1498.28	17.56	30	13	48	88	1.0459	16	3.68908	1.06581	16	2.75959	1.00298	16	4.05613	0.996563	16	2.23107	0.968949	16	5.09415	0.991677	16	3.38716	0.972578	16	6.4368	0.979064	16	5.63075	1.05461	16	7.5443	1976	228.857	5.5415
A0A0H2UHM7	Tubulin alpha chain OS=Rattus norvegicus OX=10116 GN=LOC100909441 PE=3 SV=1 - [A0A0H2UHM7_RAT]	1496.62	40.63	3	2	15	64	0.9358	6	9.65223	0.967665	6	2.1034	1.02022	6	4.61742	0.971963	6	4.43954	1.05732	6	3.56587	1.03666	6	3.06785	1.03159	6	4.04072	1.0469	6	2.88655	0.884246	6	6.21109	448	49.7744	5.09717
P16617	Phosphoglycerate kinase 1 OS=Rattus norvegicus OX=10116 GN=Pgk1 PE=1 SV=2 - [PGK1_RAT]	1483.72	54.68	14	23	24	68	0.979834	62	6.66478	0.992499	62	7.83992	1.01401	62	5.97679	1.04778	62	5.91624	0.984785	62	7.9998	1.04373	62	5.78479	0.973918	62	7.55763	0.980898	62	7.66346	0.983121	62	10.6132	417	44.51	7.89893
Q38PF9	AHNAK 1 (Fragment) OS=Rattus norvegicus OX=10116 PE=2 SV=1 - [Q38PF9_RAT]	1451.71	59.77	9	1	17	59	1.22197	3	1.93746	1.26893	3	3.99089	0.901484	3	0.416278	0.970662	3	3.95542	0.868947	3	7.11121	0.959862	3	0.299663	0.895064	3	12.0474	0.848702	3	4.97706	1.27626	3	7.05675	261	28.1139	8.51416
O35142	Coatomer subunit beta' OS=Rattus norvegicus OX=10116 GN=Copb2 PE=1 SV=3 - [COPB2_RAT]	1441.71	36.35	8	2	34	78	1.15701	5	2.21625	1.19688	5	5.84507	0.901912	5	2.22646	0.947282	5	3.5653	0.930032	5	1.12165	0.955507	5	2.33841	0.912785	5	4.09099	0.922908	5	3.3191	1.23173	5	4.7054	905	102.486	5.2749
F1LP05	ATP synthase subunit alpha OS=Rattus norvegicus OX=10116 GN=Atp5f1a PE=1 SV=1 - [F1LP05_RAT]	1433.96	37.61	4	19	21	59	0.966638	56	7.22283	0.948702	56	9.87697	1.00394	56	5.51979	1.0014	56	4.29245	1.05033	56	8.52436	0.990478	56	9.22294	1.04183	56	9.91725	1.05107	56	7.22219	0.923052	56	16.1511	553	59.7757	9.26123
F1M779	Clathrin heavy chain OS=Rattus norvegicus OX=10116 GN=Cltc PE=1 SV=1 - [F1M779_RAT]	1424.6	22.57	42	37	39	70	1.02122	65	6.48075	1.0233	65	7.62161	1.01614	65	5.13414	1.01392	65	5.46944	0.983607	65	8.3019	1.0174	65	5.90881	0.957704	65	7.48901	0.973356	65	8.79351	0.990712	65	10.2614	1675	191.438	5.69385
A0A0G2JZY6	Spectrin beta chain OS=Rattus norvegicus OX=10116 GN=Sptbn1 PE=1 SV=1 - [A0A0G2JZY6_RAT]	1420.56	17.75	13	38	39	60	1.06562	59	7.76321	1.06448	59	7.91126	0.977995	59	4.64433	0.974194	59	4.93594	0.970997	59	7.52016	0.98122	59	4.44415	0.968359	59	5.67735	0.979759	59	7.51695	1.0768	59	9.24057	2310	267.741	5.79541
P05065	Fructose-bisphosphate aldolase A OS=Rattus norvegicus OX=10116 GN=Aldoa PE=1 SV=2 - [ALDOA_RAT]	1418.73	60.99	6	22	22	57	0.814878	57	9.87756	0.797805	57	8.46622	1.05767	57	3.79854	1.07362	57	6.019	1.08624	57	6.34247	1.07075	57	5.88635	1.07651	57	5.84275	1.06965	57	6.25388	0.810588	57	10.1725	364	39.3273	8.08936
P62260	14-3-3 protein epsilon OS=Rattus norvegicus OX=10116 GN=Ywhae PE=1 SV=1 - [1433E_RAT]	1417.98	66.27	3	17	19	73	0.969702	61	7.42062	0.980592	61	7.10131	0.987498	61	4.16307	1.00592	61	4.09088	1.02289	61	6.58894	0.998392	61	4.15019	1.01441	61	7.26737	1.02834	61	5.97903	0.969922	61	8.83015	255	29.1554	4.7417
Q5M7X1	Coatomer subunit beta' OS=Rattus norvegicus OX=10116 GN=Copb2 PE=2 SV=1 - [Q5M7X1_RAT]	1401.24	35.69	8	1	33	74	1.11219	1		1.13435	1		0.930469	1		1.02507	1		0.950389	1		0.940836	1		0.856372	1		0.966555	1		1.22547	1		905	102.396	5.2749
G3V8L9	Caveolae-associated protein 1 OS=Rattus norvegicus OX=10116 GN=Cavin1 PE=1 SV=1 - [G3V8L9_RAT]	1365.23	32.4	7	15	16	49	1.07713	48	7.39519	1.06964	48	9.84904	0.969532	48	4.47796	0.978051	48	5.8003	0.993861	48	5.3026	0.97852	48	2.91509	0.98589	48	8.3481	0.979774	48	7.71686	1.08934	48	12.148	392	43.882	5.51611
P04785	Protein disulfide-isomerase OS=Rattus norvegicus OX=10116 GN=P4hb PE=1 SV=2 - [PDIA1_RAT]	1328.28	49.12	1	27	28	82	1.01842	81	7.40605	1.03924	81	8.19914	0.998537	81	4.74736	1.00811	81	4.67704	0.981344	81	9.14284	0.997726	81	5.79659	0.991613	81	11.4647	0.990159	81	9.77983	1.00259	81	12.7056	509	56.9157	4.93213
D3ZRN3	Actin, beta-like 2 OS=Rattus norvegicus OX=10116 GN=Actbl2 PE=1 SV=1 - [D3ZRN3_RAT]	1320.06	21.81	6	1	10	74	0.778771	1		1.18434	1		0.928381	1		1.15594	1		0.928197	1		1.09767	1		0.842521	1		1.17628	1		0.860629	1		376	41.9359	5.49072
O88600	Heat shock 70 kDa protein 4 OS=Rattus norvegicus OX=10116 GN=Hspa4 PE=1 SV=1 - [HSP74_RAT]	1316.3	46.43	12	27	32	57	0.922673	49	5.65342	0.925255	49	5.0335	1.03087	49	3.4496	1.02537	49	5.49747	1.02648	49	6.30258	1.04891	49	5.10696	1.04013	49	6.35172	1.02712	49	6.94185	0.910407	49	9.82948	840	93.9971	5.21143
Q6P3V8	RNA helicase OS=Rattus norvegicus OX=10116 GN=Eif4a1 PE=1 SV=1 - [Q6P3V8_RAT]	1305.99	31.03	4	5	15	58	1.01709	31	7.17252	1.02938	31	8.37899	0.988787	31	3.93009	1.01065	31	4.72056	1.00353	31	4.77283	0.997459	31	3.50799	0.985589	31	7.92449	0.98084	31	4.59849	1.03981	31	8.04206	406	46.1246	5.47803
P62961	Y-box-binding protein 1 OS=Rattus norvegicus OX=10116 GN=Ybx1 PE=2 SV=3 - [YBOX1_RAT]	1245.63	44.41	8	6	8	34	1.02644	28	5.93867	1.03563	28	13.5361	1.001	28	7.73216	1.00981	28	9.92238	1.01077	28	7.51601	0.964708	28	9.52051	1.00042	28	10.545	0.957945	28	8.19849	1.0083	28	14.1162	322	35.7086	9.87646
Q62785	28 kDa heat- and acid-stable phosphoprotein OS=Rattus norvegicus OX=10116 GN=Pdap1 PE=1 SV=1 - [HAP28_RAT]	1218.27	58.56	18	12	15	47	0.951622	44	8.23479	0.938379	44	7.23756	1.01088	44	6.41353	1.01007	44	6.04691	1.01297	44	5.3266	1.02339	44	8.43015	1.02889	44	6.34451	1.02345	44	7.83712	0.941538	44	7.42628	181	20.5925	7.38623
Q68FR6	Elongation factor 1-gamma OS=Rattus norvegicus OX=10116 GN=Eef1g PE=2 SV=3 - [EF1G_RAT]	1214.16	36.38	1	21	21	57	0.96205	57	5.63014	0.986663	57	6.23568	1.0237	57	4.22492	1.04498	57	5.87174	1.00493	57	6.1049	1.02924	57	6.57796	0.971876	57	6.91303	0.991959	57	5.90641	0.983755	57	9.13823	437	50.0292	6.7417
P47942	Dihydropyrimidinase-related protein 2 OS=Rattus norvegicus OX=10116 GN=Dpysl2 PE=1 SV=1 - [DPYL2_RAT]	1208.34	44.23	16	16	22	47	1.14353	36	10.0034	1.16717	36	10.6552	0.928594	36	4.81445	0.959322	36	4.92674	0.93509	36	9.95469	0.961729	36	5.39998	0.929609	36	11.9949	0.963881	36	13.5122	1.19461	36	13.6012	572	62.2386	6.37939
A0A0G2JW88	Microtubule-associated protein OS=Rattus norvegicus OX=10116 GN=Map4 PE=1 SV=1 - [A0A0G2JW88_RAT]	1126.17	20.45	2	5	39	76	1.03779	14	5.93337	1.0449	14	13.1022	0.977615	14	3.5199	0.950648	14	3.9614	1.03368	14	3.8775	0.926707	14	4.73695	1.01165	14	3.90752	1.04405	14	4.2029	1.02035	14	6.59065	2201	233.25	5.61768
P11598	Protein disulfide-isomerase A3 OS=Rattus norvegicus OX=10116 GN=Pdia3 PE=1 SV=2 - [PDIA3_RAT]	1120.15	49.5	3	27	28	60	1.10064	58	8.65178	1.12382	58	8.38559	0.970822	58	5.66122	0.992164	58	3.23928	0.960657	58	8.67776	0.992335	58	4.96979	0.957206	58	9.7649	0.941402	58	6.78283	1.058	58	11.6653	505	56.5877	6.21436
G3V928	Prolow-density lipoprotein receptor-related protein 1 OS=Rattus norvegicus OX=10116 GN=Lrp1 PE=1 SV=1 - [LRP1_RAT]	1109.4	9.92	10	40	40	51	0.926504	51	9.2199	0.905777	51	7.32204	1.05005	51	5.06102	1.0226	51	4.96458	1.02984	51	7.40643	1.01986	51	7.52755	1.05002	51	8.9047	1.01449	51	7.27373	0.897516	51	12.7769	4545	504.558	5.36377
P13383	Nucleolin OS=Rattus norvegicus OX=10116 GN=Ncl PE=1 SV=3 - [NUCL_RAT]	1105.47	42.36	8	39	40	85	0.920333	82	7.76876	0.930612	82	4.57829	1.02867	82	4.80711	1.04939	82	5.54216	1.03353	82	5.62065	1.03821	82	5.91578	1.01733	82	6.60741	1.00485	82	4.92862	0.931905	82	10.1124	713	77.101	4.7417
G3V6T7	Protein disulfide-isomerase A4 OS=Rattus norvegicus OX=10116 GN=Pdia4 PE=1 SV=1 - [G3V6T7_RAT]	1101.48	36.08	5	23	25	55	1.13108	46	11.0612	1.13925	46	8.60757	0.948591	46	6.49697	0.966804	46	2.06381	0.958815	46	7.58669	0.960471	46	6.05206	0.946684	46	8.21532	0.963347	46	7.91093	1.13595	46	9.35231	643	72.7027	5.14795
Q5BJZ3	Proton-translocating NAD(P)(+) transhydrogenase OS=Rattus norvegicus OX=10116 GN=Nnt PE=1 SV=1 - [Q5BJZ3_RAT]	1088.82	19.89	1	20	20	36	1.06258	36	4.96857	1.07321	36	7.41948	0.968896	36	5.07755	0.976711	36	4.83812	0.999003	36	6.4179	0.994451	36	7.48076	0.963404	36	8.3048	0.959024	36	7.87732	1.07213	36	8.38048	1086	113.796	7.88428
P50137	Transketolase OS=Rattus norvegicus OX=10116 GN=Tkt PE=1 SV=1 - [TKT_RAT]	1077.56	39.65	8	25	25	54	0.808351	53	8.42828	0.810131	53	9.04137	1.05766	53	4.31467	1.10722	53	7.12288	1.03643	53	6.1574	1.11868	53	7.98828	1.03166	53	7.08967	1.03861	53	6.63542	0.832361	53	11.1413	623	67.6006	7.48877
D4A4D5	Similar to 60S acidic ribosomal protein P2 OS=Rattus norvegicus OX=10116 GN=LOC498555 PE=3 SV=1 - [D4A4D5_RAT]	1075.31	51.3	3	4	4	18	0.969544	18	8.47685	0.966544	18	6.35754	0.986529	18	4.50902	1.00272	18	5.51926	1.05779	18	9.24585	1.01021	18	4.09154	1.03792	18	6.8006	1.01913	18	6.65699	0.950757	18	5.20671	115	11.6989	4.53857
A0A0G2K0B0	Protein CDV3 homolog OS=Rattus norvegicus OX=10116 GN=Cdv3 PE=1 SV=1 - [A0A0G2K0B0_RAT]	1067.9	60.5	4	19	20	52	0.984586	51	10.7656	1.0497	51	9.7911	0.938503	51	6.28308	0.941301	51	5.49638	1.05603	51	8.9471	0.941463	51	6.18922	1.07454	51	10.0822	1.04489	51	7.88964	0.979737	51	12.9156	281	29.6293	5.68115
P85968	6-phosphogluconate dehydrogenase, decarboxylating OS=Rattus norvegicus OX=10116 GN=Pgd PE=1 SV=1 - [6PGD_RAT]	1055.28	31.06	7	14	16	39	0.873163	36	11.5161	0.8715	36	6.29984	1.0625	36	5.07278	1.05771	36	4.28496	1.04507	36	6.80208	1.05375	36	8.65343	1.03455	36	7.91951	1.05533	36	5.48239	0.869283	36	11.9258	483	53.202	7.02002
Q5M7W5	Microtubule-associated protein 4 OS=Rattus norvegicus OX=10116 GN=Map4 PE=1 SV=1 - [MAP4_RAT]	1053.24	37.56	1	1	34	62	0.892619	1		0.860954	1		0.929611	1		1.02584	1		1.04494	1		1.00423	1		1.0583	1		1.17944	1		1.00245	1		1057	110.233	4.729
Q4QQV0	Tubulin beta chain OS=Rattus norvegicus OX=10116 GN=Tubb6 PE=1 SV=1 - [Q4QQV0_RAT]	1041.12	35.35	2	6	15	45	1.1195	16	7.48931	1.08731	16	5.2598	0.961447	16	10.3407	0.953882	16	5.541	1.01539	16	8.34519	0.942969	16	3.80564	0.988108	16	4.82451	0.972403	16	7.61303	1.03651	16	22.528	447	50.0271	4.89404
A0A0G2JX64	Tropomyosin 1, alpha, isoform CRA_i OS=Rattus norvegicus OX=10116 GN=Tpm1 PE=1 SV=1 - [A0A0G2JX64_RAT]	1039.23	69.37	13	4	29	83	1.0641	12	3.0649	1.08235	12	4.02954	0.942255	12	1.86596	0.992495	12	3.55934	0.966867	12	6.92262	1.03422	12	2.57594	0.932486	12	5.05046	0.960381	12	5.90131	1.09511	12	3.30843	284	32.6886	4.75439
Q6IMZ3	Annexin OS=Rattus norvegicus OX=10116 GN=Anxa6 PE=1 SV=1 - [Q6IMZ3_RAT]	1035	43.98	9	32	36	73	1.20818	62	8.5643	1.24026	62	9.40754	0.904691	62	6.73092	0.925176	62	4.50538	0.919486	62	8.97596	0.917917	62	4.76562	0.923944	62	9.04157	0.917064	62	8.69149	1.21001	62	11.5665	673	75.7085	5.56689
Q6AYD3	Proliferation-associated protein 2G4 OS=Rattus norvegicus OX=10116 GN=Pa2g4 PE=1 SV=1 - [PA2G4_RAT]	1026.62	44.16	6	15	16	44	0.932317	42	13.5194	0.924086	42	10.2806	1.03455	42	3.96141	1.05729	42	5.08479	1.01217	42	7.61123	1.05338	42	5.70701	0.997811	42	7.58382	1.01138	42	9.92053	0.941223	42	14.0397	394	43.6292	6.85889
P62909	40S ribosomal protein S3 OS=Rattus norvegicus OX=10116 GN=Rps3 PE=1 SV=1 - [RS3_RAT]	1019.44	58.44	3	15	15	50	0.976938	50	6.53357	0.993878	50	7.12778	1.01451	50	4.86761	1.01987	50	4.71784	1.02044	50	5.947	1.0216	50	5.12538	0.976118	50	8.70044	0.987226	50	8.32188	0.990554	50	8.09496	243	26.6574	9.65674
A0A0G2K3Z9	Peroxiredoxin-1 OS=Rattus norvegicus OX=10116 PE=3 SV=1 - [A0A0G2K3Z9_RAT]	1018.76	56.28	2	9	11	41	0.932229	34	9.01787	0.927823	34	4.0444	1.04583	34	4.69378	1.06793	34	4.69405	1.00103	34	5.5943	1.05885	34	4.09957	1.01271	34	5.52046	0.984486	34	5.5953	0.920909	34	7.00927	199	22.1504	8.39697
P62804	Histone H4 OS=Rattus norvegicus OX=10116 GN=H4c2 PE=1 SV=2 - [H4_RAT]	1010.36	58.25	2	7	7	47	1.08696	47	10.7693	1.08398	47	10.9243	0.984334	47	3.88773	0.972644	47	4.3957	0.987888	47	10.4229	0.974642	47	6.96837	0.990864	47	10.7198	0.976314	47	10.4157	0.997917	47	14.0593	103	11.3604	11.356
F1LM82	Heterogeneous nuclear ribonucleoproteins A2/B1 OS=Rattus norvegicus OX=10116 GN=Hnrnpa2b1 PE=1 SV=3 - [F1LM82_RAT]	1010.15	53.16	5	12	18	55	1.13236	32	7.29435	1.13225	32	10.4523	0.935771	32	7.18533	0.950102	32	7.29706	0.959	32	9.97967	0.959419	32	6.43405	0.949435	32	6.92926	0.947187	32	7.18199	1.13504	32	17.9595	301	32.4485	8.90967
Q5FVG5	Similar to tropomyosin 1, embryonic fibroblast-rat, isoform CRA_c OS=Rattus norvegicus OX=10116 GN=Tpm2 PE=2 SV=1 - [Q5FVG5_RAT]	1010.1	70.07	9	4	30	78	0.965285	8	6.86521	1.03111	8	5.98312	0.990739	8	3.08149	0.994803	8	5.03036	1.01001	8	3.59201	0.97966	8	5.48505	1.02781	8	4.56006	1.03148	8	3.40299	1.00251	8	8.9542	284	32.9376	4.66553
P09495	Tropomyosin alpha-4 chain OS=Rattus norvegicus OX=10116 GN=Tpm4 PE=1 SV=3 - [TPM4_RAT]	1008.27	74.19	8	12	29	83	1.06131	29	6.79373	1.03035	29	8.2683	0.982863	29	3.04313	1.00833	29	3.7334	0.974156	29	8.59331	1.0072	29	5.83603	0.967053	29	7.61663	0.961564	29	6.68	1.05669	29	10.2468	248	28.4925	4.69092
P25113	Phosphoglycerate mutase 1 OS=Rattus norvegicus OX=10116 GN=Pgam1 PE=1 SV=4 - [PGAM1_RAT]	999.709	49.21	12	13	13	60	0.964632	57	9.06408	0.971319	57	8.42241	1.00898	57	7.85368	1.03548	57	6.34147	0.97841	57	15.378	1.0353	57	8.31653	0.993476	57	15.1016	0.989677	57	9.3934	0.97709	57	16.501	254	28.8139	7.18115
Q2PQA9	Kinesin-1 heavy chain OS=Rattus norvegicus OX=10116 GN=Kif5b PE=1 SV=1 - [KINH_RAT]	994.329	28.87	7	25	26	41	1.07609	40	6.12089	1.09467	40	8.29027	0.960498	40	5.44104	0.976017	40	4.37913	0.95432	40	5.69111	0.97944	40	6.04312	0.962785	40	6.23386	0.993014	40	5.80715	1.0957	40	7.72473	963	109.463	6.44287
P62963	Profilin-1 OS=Rattus norvegicus OX=10116 GN=Pfn1 PE=1 SV=2 - [PROF1_RAT]	989.565	63.57	3	7	8	35	0.934385	34	13.0973	0.93772	34	13.3155	1.02502	34	6.57091	0.999262	34	5.12821	1.04101	34	5.16149	1.00417	34	3.53457	1.06187	34	5.90577	1.03688	34	6.60382	0.915177	34	10.9301	140	14.9475	8.27979
P07943	Aldo-keto reductase family 1 member B1 OS=Rattus norvegicus OX=10116 GN=Akr1b1 PE=1 SV=3 - [ALDR_RAT]	986.858	59.49	21	16	20	63	0.759441	49	11.8181	0.767513	49	8.89338	1.12026	49	4.95639	1.15261	49	6.82362	1.03686	49	8.05244	1.14135	49	9.92542	1.02625	49	10.3172	1.02814	49	7.97843	0.788543	49	15.0714	316	35.7743	6.7124
G3V9E3	Caldesmon 1, isoform CRA_b OS=Rattus norvegicus OX=10116 GN=Cald1 PE=1 SV=1 - [G3V9E3_RAT]	984.681	49.15	54	32	36	68	0.991005	64	8.691	0.983142	63	7.1564	1.00396	64	6.4137	1.00655	64	5.34035	1.02822	64	7.01556	0.98934	64	5.71894	1.01564	64	7.26797	0.988399	64	6.86385	0.98384	64	11.7829	531	60.5758	6.58057
P45592	Cofilin-1 OS=Rattus norvegicus OX=10116 GN=Cfl1 PE=1 SV=3 - [COF1_RAT]	984.409	60.84	4	14	17	62	1.069	48	11.1423	1.04512	48	9.42767	1.00271	48	5.75916	1.00356	48	4.45992	0.981984	48	9.43859	0.962347	48	5.74017	0.98829	48	10.8581	0.976549	48	9.8573	1.02817	48	14.8232	166	18.5207	8.08936
P58775	Tropomyosin beta chain OS=Rattus norvegicus OX=10116 GN=Tpm2 PE=1 SV=1 - [TPM2_RAT]	980.327	65.85	9	2	28	73	1.4098	3	5.56273	1.34717	3	16.063	0.805304	3	5.3168	0.839697	3	6.02937	0.880463	3	6.96583	0.843029	3	0.815632	0.906035	3	5.51744	0.914999	3	7.70012	1.43734	3	0.591587	284	32.8166	4.70361
P05982	NAD(P)H dehydrogenase [quinone] 1 OS=Rattus norvegicus OX=10116 GN=Nqo1 PE=1 SV=4 - [NQO1_RAT]	977.072	37.96	1	15	15	53	0.761757	53	10.5727	0.757222	53	9.12429	1.09094	53	4.72012	1.11433	53	5.78975	1.08329	53	7.14829	1.12002	53	6.33795	1.05494	53	6.7729	1.06272	53	5.02694	0.766796	53	15.0253	274	30.927	8.42627
D4A781	Importin 5 OS=Rattus norvegicus OX=10116 GN=Ipo5 PE=1 SV=1 - [D4A781_RAT]	968.509	19.78	4	16	17	32	0.853843	31	8.28306	0.875753	31	8.28056	1.07468	31	3.1502	1.10962	31	5.14561	0.997876	31	9.08641	1.08662	31	4.28226	0.979893	31	7.90052	0.985843	31	7.70754	0.88386	31	15.891	1097	123.626	4.95752
M0R961	Far upstream element-binding protein 2 OS=Rattus norvegicus OX=10116 GN=Khsrp PE=1 SV=1 - [M0R961_RAT]	945.914	32.04	8	14	19	36	1.05919	26	7.12313	1.05207	26	7.40061	0.975716	26	6.19628	0.96303	26	6.41075	1.0271	26	5.31921	0.970734	26	5.70347	1.01211	26	8.4536	1.00339	26	6.82142	1.01493	26	9.06766	721	74.1665	6.96143
P50399	Rab GDP dissociation inhibitor beta OS=Rattus norvegicus OX=10116 GN=Gdi2 PE=1 SV=2 - [GDIB_RAT]	945.824	33.71	4	12	15	36	1.01538	30	9.69175	1.04278	30	9.94852	0.988892	30	5.38273	1.03141	30	3.94926	0.971207	30	8.05985	1.04286	30	6.3046	0.975432	30	10.5775	0.96524	30	7.10812	1.00542	30	17.4792	445	50.5047	6.25244
Q9EPH8	Polyadenylate-binding protein 1 OS=Rattus norvegicus OX=10116 GN=Pabpc1 PE=1 SV=1 - [PABP1_RAT]	943.305	41.35	7	16	28	51	1.00062	32	7.06765	1.02119	32	5.75802	0.993646	32	6.15646	1.01493	32	1.81892	0.997375	32	9.45152	1.00983	32	4.78943	0.9947	32	8.22451	0.970261	32	7.28687	1.03421	32	10.7316	636	70.6559	9.49561
P11507	Sarcoplasmic/endoplasmic reticulum calcium ATPase 2 OS=Rattus norvegicus OX=10116 GN=Atp2a2 PE=1 SV=1 - [AT2A2_RAT]	940.763	18.98	7	11	21	32	0.989306	14	5.90478	0.989045	14	6.92735	1.00144	14	5.75321	1.02194	14	3.23684	1.00487	14	3.86198	1.01799	14	6.65025	1.01987	14	6.94382	1.01335	14	4.47468	0.961816	14	8.03891	1043	114.694	5.33838
G3V786	Aldo-keto reductase family 1, member B8 OS=Rattus norvegicus OX=10116 GN=Akr1b8 PE=1 SV=1 - [G3V786_RAT]	935.76	53.8	20	1	18	64	0.644899	2	22.6683	0.628584	2	21.2633	1.22575	2	8.93953	1.06827	2	13.7982	1.14115	2	5.07625	1.1468	2	7.53957	1.14939	2	1.64699	1.03463	2	10.4458	0.660528	2	24.0244	316	36.1378	7.45947
Q91W30	Aldose reductase-like protein OS=Rattus norvegicus OX=10116 GN=Akr1b8 PE=2 SV=1 - [Q91W30_RAT]	935.76	53.8	20	1	18	64	0.569212	2	0.184429	0.611632	2	9.82651	1.13448	2	2.93818	1.16975	2	7.73386	1.10918	2	0.482844	1.17858	2	3.32088	1.11446	2	10.6809	1.09651	2	4.04689	0.72224	2	14.8184	316	36.1678	7.45947
P10111	Peptidyl-prolyl cis-trans isomerase A OS=Rattus norvegicus OX=10116 GN=Ppia PE=1 SV=2 - [PPIA_RAT]	935.423	46.34	6	9	11	49	1.11546	42	5.38534	1.10855	42	7.9161	0.974407	42	3.76905	0.981107	42	4.26539	0.965468	42	9.28478	0.979689	42	5.26498	0.952288	42	5.49938	0.960523	42	8.597	1.07343	42	9.01112	164	17.8628	8.1626
P52944	PDZ and LIM domain protein 1 OS=Rattus norvegicus OX=10116 GN=Pdlim1 PE=1 SV=4 - [PDLI1_RAT]	934.843	66.06	17	18	19	51	0.975369	45	6.50382	0.97354	45	7.42423	1.02397	45	5.03403	1.05054	45	5.15657	0.978566	45	8.4609	1.0625	45	5.72295	0.970001	45	10.6273	0.989837	45	7.15591	0.991487	45	12.9974	327	35.5618	7.23975
P04906	Glutathione S-transferase P OS=Rattus norvegicus OX=10116 GN=Gstp1 PE=1 SV=2 - [GSTP1_RAT]	931.022	46.67	3	8	8	32	0.622558	32	21.1345	0.64763	32	15.9089	1.13555	32	3.34523	1.20893	32	12.7597	1.04765	32	12.4528	1.15854	32	11.6729	1.04337	32	9.89934	1.05825	32	9.87655	0.670516	32	11.5505	210	23.4241	7.35693
G3V7L1	Utrophin OS=Rattus norvegicus OX=10116 GN=Utrn PE=1 SV=3 - [G3V7L1_RAT]	928.725	13.6	10	43	44	56	1.00264	55	6.50317	1.01052	55	7.72242	0.990734	55	4.10405	0.993714	55	3.57187	0.993646	55	5.36265	1.00577	55	3.58573	1.02544	55	7.38893	1.00081	55	5.39335	1.01529	55	7.64636	3419	391.069	5.2876
P00507	Aspartate aminotransferase, mitochondrial OS=Rattus norvegicus OX=10116 GN=Got2 PE=1 SV=2 - [AATM_RAT]	927.391	37.67	4	16	16	45	0.971123	45	7.85408	0.970066	45	6.10356	1.01691	45	4.21746	1.06096	45	3.56258	1.00013	45	8.64063	1.03128	45	6.12919	0.980461	45	7.92109	0.997625	45	6.8285	0.951914	45	12.5253	430	47.2841	8.99756
P28480	T-complex protein 1 subunit alpha OS=Rattus norvegicus OX=10116 GN=Tcp1 PE=1 SV=1 - [TCPA_RAT]	924.452	39.03	5	22	23	38	0.952155	37	5.82803	0.950364	37	11.3477	1.00628	37	7.45469	1.00618	37	5.56964	1.03426	37	8.62821	1.01576	37	6.61451	1.02902	37	9.99576	1.03902	37	8.20591	0.893053	37	14.0919	556	60.3217	6.21436
P56574	Isocitrate dehydrogenase [NADP], mitochondrial OS=Rattus norvegicus OX=10116 GN=Idh2 PE=1 SV=2 - [IDHP_RAT]	922.384	31.64	2	15	15	41	1.01281	41	7.3311	1.05517	41	8.48312	1.0073	41	5.47429	1.01089	41	6.12607	0.979709	41	7.64058	1.00149	41	4.53486	0.956547	41	11.4636	0.950692	41	7.66181	1.04286	41	8.62373	452	50.9349	8.68994
D4AC23	T-complex protein 1 subunit eta OS=Rattus norvegicus OX=10116 GN=Cct7 PE=1 SV=1 - [D4AC23_RAT]	919.875	36.95	15	20	21	44	0.941539	43	5.04218	0.953045	43	4.72663	1.01875	43	6.22047	1.02709	43	4.41429	1.0203	43	5.58599	1.01933	43	5.27592	1.01611	43	6.17512	1.0207	43	4.78838	0.936829	43	8.67561	544	59.6202	8.00146
P06685	Sodium/potassium-transporting ATPase subunit alpha-1 OS=Rattus norvegicus OX=10116 GN=Atp1a1 PE=1 SV=1 - [AT1A1_RAT]	918.343	23.36	11	19	21	32	0.947948	28	7.02209	0.944552	28	6.06793	1.01752	28	4.09341	1.02354	28	3.70332	1.03263	28	6.49647	1.03121	28	5.10649	1.00336	28	5.29277	0.995333	28	6.00602	0.986221	28	7.94055	1023	112.982	5.45264
P63102	14-3-3 protein zeta/delta OS=Rattus norvegicus OX=10116 GN=Ywhaz PE=1 SV=1 - [1433Z_RAT]	916.1	64.9	5	13	20	61	0.956501	40	6.57149	0.992616	40	6.56567	1.01174	40	6.94045	1.02574	40	4.79184	1.00898	40	4.28955	1.02468	40	8.23599	0.979549	40	10.2162	0.975899	40	6.00372	0.984326	40	8.68953	245	27.7537	4.79248
G3V6S5	C-1-tetrahydrofolate synthase, cytoplasmic OS=Rattus norvegicus OX=10116 GN=Mthfd1 PE=1 SV=1 - [G3V6S5_RAT]	913.247	23.85	4	18	20	33	0.997653	31	5.59282	1.00816	31	5.87124	0.986603	31	5.47912	0.999945	31	4.72362	1	31	6.92976	1.01784	31	6.50801	0.987727	31	5.43493	0.981194	31	6.15109	0.998854	31	10.6738	935	100.902	7.41553
Q5U300	Ubiquitin-like modifier-activating enzyme 1 OS=Rattus norvegicus OX=10116 GN=Uba1 PE=1 SV=1 - [UBA1_RAT]	912.196	21.83	10	21	22	40	1.02917	38	5.93189	1.03293	38	6.92925	0.979724	38	4.18329	0.991288	38	3.35612	1.00156	38	5.3062	1.00182	38	4.37361	0.981657	38	7.21965	0.988262	38	5.51205	1.05525	38	7.1346	1058	117.713	5.56689
P63245	Receptor of activated protein C kinase 1 OS=Rattus norvegicus OX=10116 GN=Rack1 PE=1 SV=3 - [RACK1_RAT]	909.404	53.63	3	15	15	37	0.990631	37	9.89499	0.995714	37	5.83889	1.01266	37	3.03434	1.03559	37	3.45607	1.00126	37	7.41325	1.03592	37	5.28246	0.998273	37	6.49308	0.995972	37	9.13708	0.975691	37	9.93436	317	35.0546	7.69385
M0R4L7	Histone H2B OS=Rattus norvegicus OX=10116 GN=Hist1h2bl PE=3 SV=1 - [M0R4L7_RAT]	899.28	70.63	10	1	13	126	0.903327	1		0.985539	1		1.0603	1		0.917881	1		1.09613	1		0.944469	1		1.19371	1		1.08063	1		0.816346	1		126	13.9016	10.3159
D4A4Z9	Kinectin 1 OS=Rattus norvegicus OX=10116 GN=Ktn1 PE=1 SV=2 - [D4A4Z9_RAT]	898.569	27.55	14	38	40	57	0.933686	53	5.64597	0.955081	53	6.24606	1.03465	53	4.15876	1.03403	53	3.86684	1.00508	53	4.50015	1.03658	53	5.48849	1.00913	53	6.92819	0.997232	53	6.45377	0.972547	53	7.79857	1325	151.702	6.01123
Q05175	Brain acid soluble protein 1 OS=Rattus norvegicus OX=10116 GN=Basp1 PE=1 SV=2 - [BASP1_RAT]	882.644	74.09	2	1	13	22	1.01103	6	8.30575	1.15618	6	7.55009	0.932307	6	3.95128	0.971006	6	3.71953	0.976382	6	1.80382	0.928894	6	6.95606	1.01646	6	8.03719	1.01786	6	10.1221	1.12716	6	8.05624	220	21.7774	4.51318
P11762	Galectin-1 OS=Rattus norvegicus OX=10116 GN=Lgals1 PE=1 SV=2 - [LEG1_RAT]	877.466	74.07	1	9	9	36	1.04302	35	6.23086	1.04518	35	6.76593	0.980533	35	6.1088	1.0089	35	3.60822	0.976192	35	7.71619	1.00912	35	6.16103	0.979971	35	9.9026	0.962285	35	10.3914	1.04586	35	7.93326	135	14.8472	5.26221
D3ZWM5	Histone H2B OS=Rattus norvegicus OX=10116 GN=Hist1h2bd PE=3 SV=2 - [D3ZWM5_RAT]	876.304	70.63	7	2	13	100	1.06335	5	16.7709	1.11284	5	1.38883	1.04073	5	7.613	0.937431	5	3.88769	0.992781	5	9.80827	0.919797	5	6.23354	1.03319	5	6.98369	0.907462	5	3.25426	1.04071	5	17.6615	126	13.9556	10.3159
P04642	L-lactate dehydrogenase A chain OS=Rattus norvegicus OX=10116 GN=Ldha PE=1 SV=1 - [LDHA_RAT]	867.983	47.89	11	15	19	63	0.988966	55	6.58943	0.987727	55	5.64436	1.00567	55	4.86818	1.01042	55	5.52012	1.01409	55	6.05334	1.02169	55	6.44163	0.99041	55	7.63233	0.980821	55	4.05004	0.983418	55	7.96234	332	36.4273	8.26514
Q3KRF2	High density lipoprotein binding protein (Vigilin) OS=Rattus norvegicus OX=10116 GN=Hdlbp PE=1 SV=1 - [Q3KRF2_RAT]	865.066	23.58	17	30	32	47	1.11893	43	7.95084	1.10674	43	9.9531	0.945596	43	5.97063	0.950706	43	3.96927	0.996339	43	8.81988	0.936345	43	6.96831	0.983683	43	8.46394	0.980309	43	5.67898	1.07028	43	11.3371	1268	141.608	6.94678
Q6P2A5	GTP:AMP phosphotransferase AK3, mitochondrial OS=Rattus norvegicus OX=10116 GN=Ak3 PE=1 SV=1 - [Q6P2A5_RAT]	861.926	51.54	2	12	12	32	0.97547	32	7.77682	0.99241	32	7.23525	0.996308	32	4.40725	1.03604	32	3.85576	0.999981	32	7.2548	1.02893	32	4.70023	1.01959	32	8.58099	0.992713	32	6.32046	0.974349	32	12.9726	227	25.4785	8.85107
F1LMW7	Myristoylated alanine-rich C-kinase substrate OS=Rattus norvegicus OX=10116 GN=Marcks PE=1 SV=3 - [F1LMW7_RAT]	853.276	44.98	2	7	7	14	1.43961	14	16.0315	1.19869	14	33.6881	0.893473	14	13.5916	0.889835	14	10.3344	0.899126	14	11.8703	0.885957	14	6.88987	0.846726	14	14.0066	0.973855	14	20.1842	1.32069	14	20.2311	309	29.942	4.36084
F1LNF0	Myosin heavy chain 14 OS=Rattus norvegicus OX=10116 GN=Myh14 PE=1 SV=1 - [F1LNF0_RAT]	851.064	6.45	25	1	21	41	0.929705	1		1.0279	1		0.985349	1		1.04262	1		0.982844	1		0.996727	1		1.04431	1		1.08511	1		0.907739	1		2000	228.775	5.5542
Q00715	Histone H2B type 1 OS=Rattus norvegicus OX=10116 PE=1 SV=2 - [H2B1_RAT]	845.648	65.6	6	2	12	86	0.99071	4	15.756	1.19153	4	6.6782	1.02325	4	10.5628	0.98571	4	3.72813	1.11273	4	4.28378	0.932637	4	11.4802	1.03886	4	2.08865	0.943129	4	2.74102	0.93735	4	10.3192	125	13.9816	10.3599
P85834	Elongation factor Tu, mitochondrial OS=Rattus norvegicus OX=10116 GN=Tufm PE=1 SV=1 - [EFTU_RAT]	844.175	40.04	3	15	16	31	0.941196	28	4.88646	0.944725	28	3.76804	1.01357	28	4.958	1.04557	28	4.37853	1.01789	28	4.04765	1.04899	28	5.1804	1.00394	28	6.63806	1.00016	28	4.76193	0.957973	28	5.50234	452	49.491	7.56201
Q6LDS4	Superoxide dismutase [Cu-Zn] OS=Rattus norvegicus OX=10116 PE=2 SV=1 - [Q6LDS4_RAT]	839.911	63.82	3	11	11	31	1.15091	31	7.32844	1.13148	31	9.88917	1.02809	31	5.65506	1.03021	31	3.07415	0.881855	31	11.8086	1.02861	31	4.71097	0.862976	31	12.6448	0.838866	31	13.5977	1.14337	31	14.7501	152	15.6997	6.354
F7FF45	Nuclear mitotic apparatus protein 1 OS=Rattus norvegicus OX=10116 GN=Numa1 PE=1 SV=2 - [F7FF45_RAT]	830.794	20.09	38	34	41	49	1.08584	40	13.3436	1.08984	40	13.0083	0.969565	40	7.2391	0.950666	40	4.84584	0.965213	40	9.5725	0.948955	40	6.89656	0.983932	40	11.3853	0.978683	40	9.60449	1.08575	40	16.311	2091	234.796	5.73193
G3V6S3	Calumenin OS=Rattus norvegicus OX=10116 GN=Calu PE=1 SV=1 - [G3V6S3_RAT]	829.109	40.32	1	3	10	34	1.03799	10	4.13645	1.06581	10	1.91222	0.984846	10	4.26202	1.01062	10	4.22453	0.944174	10	6.69865	1.03019	10	5.61325	0.914222	10	3.37574	0.945747	10	2.6808	1.14041	10	10.6849	315	37.0405	4.66553
Q5XFW8	Protein SEC13 homolog OS=Rattus norvegicus OX=10116 GN=Sec13 PE=1 SV=1 - [SEC13_RAT]	825.112	28.26	4	7	7	22	1.05155	22	10.9786	1.05066	22	10.5612	0.998916	22	7.66412	0.971966	22	5.84538	0.952772	22	8.7497	0.971288	22	9.34647	1.00357	22	6.92502	1.00705	22	10.4451	1.08253	22	8.69425	322	35.5251	5.37646
P38983	40S ribosomal protein SA OS=Rattus norvegicus OX=10116 GN=Rpsa PE=1 SV=3 - [RSSA_RAT]	824.838	36.61	1	9	9	30	0.954321	30	6.30177	0.97047	30	5.35258	0.993191	30	2.91522	1.02123	30	4.47615	1.03366	30	8.17635	1.03615	30	6.30837	1.02002	30	7.62753	1.02369	30	6.32507	0.976921	30	8.15762	295	32.8034	4.86865
M0R735	Heterogeneous nuclear ribonucleoprotein Q OS=Rattus norvegicus OX=10116 GN=Syncrip PE=1 SV=2 - [M0R735_RAT]	824.491	37.37	5	11	22	48	0.980509	22	9.73911	0.995036	22	6.69423	0.989758	22	4.05597	1.02271	22	3.29603	0.971039	22	5.38882	1.04664	22	3.18206	0.964938	22	8.58136	0.968907	22	5.85886	1.04294	22	9.60078	562	62.6333	7.56201
Q68FZ8	Propionyl coenzyme A carboxylase, beta polypeptide OS=Rattus norvegicus OX=10116 GN=Pccb PE=1 SV=1 - [Q68FZ8_RAT]	813.136	25.32	6	11	12	26	0.852817	25	9.22959	0.858801	25	8.56634	1.06993	25	6.38329	1.06581	25	5.0143	1.0632	25	10.33	1.04784	25	10.3245	1.04915	25	11.6938	1.05882	25	9.39994	0.81623	25	12.417	541	58.6411	7.84033
Q3MIE4	Synaptic vesicle membrane protein VAT-1 homolog OS=Rattus norvegicus OX=10116 GN=Vat1 PE=1 SV=1 - [VAT1_RAT]	812.799	32.92	2	10	10	21	0.91058	21	10.7022	0.897743	21	8.26504	1.02314	21	3.73804	1.03698	21	7.00053	1.03173	21	6.4168	1.04394	21	3.7965	1.03794	21	7.9637	1.0526	21	8.68537	0.910272	21	11.5232	404	43.091	6.62451
F1LUV9	Neural cell adhesion molecule 1 OS=Rattus norvegicus OX=10116 GN=Ncam1 PE=1 SV=3 - [F1LUV9_RAT]	811.078	29.53	5	19	20	34	1.07042	33	9.3872	1.08126	33	8.14537	0.976261	33	4.78832	0.977054	33	3.24855	1.00602	33	5.15879	0.964942	33	5.50427	0.983099	33	6.79106	0.965195	33	5.3804	1.0631	33	10.4932	833	91.5787	4.90674
P31044	Phosphatidylethanolamine-binding protein 1 OS=Rattus norvegicus OX=10116 GN=Pebp1 PE=1 SV=3 - [PEBP1_RAT]	808.924	56.68	1	7	7	26	1.00488	25	5.60511	1.02547	25	7.71217	0.980527	25	4.29111	1.01426	25	3.94313	0.970911	25	4.56176	1.0435	25	6.48998	0.986792	25	3.49073	0.967845	25	4.71752	1.03475	25	7.86834	187	20.7884	5.79541
P07323	Gamma-enolase OS=Rattus norvegicus OX=10116 GN=Eno2 PE=1 SV=2 - [ENOG_RAT]	801.507	20.05	4	3	10	29	0.840323	3	4.02063	0.911336	3	28.9947	1.07482	3	16.3353	1.14495	3	17.1885	0.86789	3	17.4006	1.10836	3	14.3959	0.846112	3	11.6068	0.873213	3	20.9193	0.809443	3	3.56864	434	47.1109	5.16064
Q6P9V7	Proteasome (Prosome, macropain) activator subunit 1 OS=Rattus norvegicus OX=10116 GN=Psme1 PE=1 SV=1 - [Q6P9V7_RAT]	794.476	57.83	3	14	15	35	0.953383	34	5.81421	0.973904	34	6.22893	1.06632	34	4.23477	1.08134	34	3.72881	0.958645	34	10.1796	1.09462	34	4.63799	0.945577	34	7.68343	0.958391	34	7.87826	0.962137	34	8.36525	249	28.617	5.80811
Q7TPB1	T-complex protein 1 subunit delta OS=Rattus norvegicus OX=10116 GN=Cct4 PE=1 SV=3 - [TCPD_RAT]	794.422	37.29	2	21	22	38	0.97833	37	8.74708	0.96302	37	6.30693	1.03122	37	3.81982	1.01759	37	6.99708	1.00852	37	6.42672	1.03091	37	7.28042	0.992958	37	7.09631	0.995761	37	8.79404	0.955181	37	8.70106	539	58.0628	8.01611
O88989	Malate dehydrogenase, cytoplasmic OS=Rattus norvegicus OX=10116 GN=Mdh1 PE=1 SV=3 - [MDHC_RAT]	788.307	33.53	7	13	14	32	1.03565	28	5.96503	1.05456	28	8.08071	0.97865	28	3.02128	0.986728	28	3.25172	0.976498	28	7.21065	1.00959	28	4.71174	0.97037	28	4.85208	0.980782	28	7.31859	1.04775	28	8.88208	334	36.46	6.58057
Q4V8F6	Pcbp2 protein OS=Rattus norvegicus OX=10116 GN=Pcbp2 PE=1 SV=1 - [Q4V8F6_RAT]	785.426	34.33	7	9	11	23	1.07326	21	6.65307	1.08111	21	5.51097	0.976594	21	5.96053	0.996306	21	4.46899	0.984769	21	7.46191	0.98233	21	3.17176	0.994174	21	5.08987	0.970192	21	6.11633	1.07815	21	5.87589	335	35.3242	8.00146
Q9ER34	Aconitate hydratase, mitochondrial OS=Rattus norvegicus OX=10116 GN=Aco2 PE=1 SV=2 - [ACON_RAT]	777.822	33.97	1	24	24	48	0.964423	48	8.29438	0.943556	48	8.00189	1.01609	48	5.05214	1.03028	48	5.07706	1.02179	48	8.5434	1.03478	48	5.78429	1.0138	48	5.59781	1.01485	48	7.73515	0.940109	48	12.1639	780	85.38	7.82568
Q5RKI0	WD repeat-containing protein 1 OS=Rattus norvegicus OX=10116 GN=Wdr1 PE=1 SV=3 - [WDR1_RAT]	776.598	32.51	3	15	15	22	0.968832	22	8.48841	0.964633	22	7.79205	1.01272	22	4.15875	1.03386	22	5.29539	0.994788	22	9.77316	1.03943	22	9.97827	0.992612	22	10.5661	0.977259	22	6.65719	0.995013	22	11.0923	606	66.1399	6.62451
Q5D059	Heterogeneous nuclear ribonucleoprotein K OS=Rattus norvegicus OX=10116 GN=Hnrnpk PE=1 SV=1 - [Q5D059_RAT]	762.733	31.47	1	1	14	32	0.897066	1		0.957826	1		1.01677	1		0.977307	1		1.02192	1		1.0407	1		1.07767	1		1.03883	1		0.960889	1		464	50.9964	5.32568
Q924S5	Lon protease homolog, mitochondrial OS=Rattus norvegicus OX=10116 GN=Lonp1 PE=2 SV=1 - [LONM_RAT]	760.123	22.53	8	21	21	33	0.662556	32	11.7813	0.678699	32	12.6424	1.12555	32	6.24394	1.1604	32	4.11979	1.08575	32	7.19918	1.17328	32	6.45117	1.07941	32	4.86997	1.09006	32	4.02392	0.694957	32	17.2427	950	105.726	6.59521
D3ZH41	Cytoskeleton-associated protein 4 OS=Rattus norvegicus OX=10116 GN=Ckap4 PE=1 SV=2 - [D3ZH41_RAT]	756.539	43.25	1	16	16	29	1.01291	29	6.22451	1.04619	29	4.58237	0.976674	29	3.53556	0.992078	29	2.73015	1.01226	29	5.43402	0.996805	29	5.08923	0.997584	29	6.02456	0.981182	29	4.18713	0.99713	29	10.472	326	36.2937	4.81787
A0A0G2JVH4	MICOS complex subunit MIC60 OS=Rattus norvegicus OX=10116 GN=Immt PE=1 SV=1 - [A0A0G2JVH4_RAT]	753.048	28.35	3	20	20	32	0.931487	32	7.72162	0.965805	32	6.02036	0.99997	32	6.26236	0.998226	32	4.35548	1.02128	32	8.58105	1.01595	32	4.37342	1.01252	32	8.09422	1.01157	32	3.97205	0.970217	32	15.9503	776	86.1759	5.84619
A0A0G2K6J5	Myosin light polypeptide 6 OS=Rattus norvegicus OX=10116 GN=Myl6 PE=1 SV=1 - [A0A0G2K6J5_RAT]	751.835	45.7	6	8	8	27	0.981834	27	7.035	0.982227	27	5.29495	1.02043	27	5.77991	1.02264	27	2.12238	1.0419	27	5.33863	0.985547	27	6.13512	1.01805	27	5.16617	1.00804	27	3.97369	0.953088	27	5.40445	151	16.9501	4.55127
Q63355	Unconventional myosin-Ic OS=Rattus norvegicus OX=10116 GN=Myo1c PE=1 SV=2 - [MYO1C_RAT]	750.436	18.68	9	18	20	29	0.989117	27	4.92691	1.006	27	7.10808	1.02488	27	3.42103	1.00972	27	3.87307	1.00862	27	5.32687	0.990142	27	5.34598	1.02996	27	7.45874	1.00585	27	6.54797	0.967502	27	9.33745	1044	119.737	9.39307
P62907	60S ribosomal protein L10a OS=Rattus norvegicus OX=10116 GN=Rpl10a PE=1 SV=2 - [RL10A_RAT]	749.336	50.69	5	12	12	31	1.00243	31	7.13716	0.987282	31	7.4146	0.997475	31	4.42191	1.05083	31	5.42653	0.970324	31	9.23152	1.03695	31	5.46943	0.936457	31	7.56112	0.940851	31	6.36187	1.03677	31	9.49804	217	24.8155	9.93506
Q5RKI1	Eukaryotic initiation factor 4A-II OS=Rattus norvegicus OX=10116 GN=Eif4a2 PE=1 SV=1 - [IF4A2_RAT]	747.678	27.52	3	2	13	35	0.891783	5	10.744	0.909235	5	5.08023	1.04672	5	3.28313	1.06815	5	8.33687	1.01027	5	1.45116	1.06262	5	4.05189	1.036	5	1.32353	1.06016	5	3.84297	0.891627	5	2.56648	407	46.3728	5.47803
P61980	Heterogeneous nuclear ribonucleoprotein K OS=Rattus norvegicus OX=10116 GN=Hnrnpk PE=1 SV=1 - [HNRPK_RAT]	744.847	30.89	4	1	14	32	1.07571	1		1.02505	1		0.980338	1		0.929956	1		1.00391	1		0.926113	1		1.0723	1		1.071	1		1.0083	1		463	50.9444	5.5415
Q3MHS9	Chaperonin containing Tcp1, subunit 6A (Zeta 1) OS=Rattus norvegicus OX=10116 GN=Cct6a PE=1 SV=1 - [Q3MHS9_RAT]	741.907	29.57	7	17	19	33	0.932236	31	5.60681	0.940585	31	7.27378	1.02828	31	3.79084	1.0422	31	3.35241	1.01911	31	5.82676	1.02274	31	4.43748	1.03724	31	6.28565	1.00593	31	5.19265	0.896447	31	9.46853	531	57.9807	7.07861
D4A8Y5	Staphylococcal nuclease domain-containing protein OS=Rattus norvegicus OX=10116 GN=Snd1 PE=1 SV=2 - [D4A8Y5_RAT]	741.38	21.45	2	19	20	36	1.0781	35	8.96015	1.09666	35	9.42344	0.956934	35	5.22514	0.983789	35	3.34077	0.968687	35	10.6477	1.00706	35	3.18578	0.949662	35	8.76948	0.957512	35	8.65075	1.11346	35	10.9592	881	98.991	6.84424
Q04462	Valine--tRNA ligase OS=Rattus norvegicus OX=10116 GN=Vars1 PE=2 SV=2 - [SYVC_RAT]	738.395	17.41	3	20	20	34	0.879683	33	8.50834	0.909329	34	8.20256	1.03194	33	4.93199	1.03917	34	5.52322	1.04217	34	6.06987	1.0437	34	4.94778	1.06499	34	7.02416	1.03403	33	5.93853	0.906613	33	12.1679	1264	140.28	7.60596
F1LQ48	Heterogeneous nuclear ribonucleoprotein L OS=Rattus norvegicus OX=10116 GN=Hnrnpl PE=1 SV=2 - [HNRPL_RAT]	732.468	35.31	8	19	19	40	1.05317	40	10.2532	1.04386	39	7.2518	0.977822	40	7.25074	0.997161	40	5.84968	0.989829	40	6.97052	0.989882	40	6.29845	0.992819	40	10.0198	0.991261	40	10.7261	1.01984	40	9.44151	623	67.8603	8.47021
P68255	14-3-3 protein theta OS=Rattus norvegicus OX=10116 GN=Ywhaq PE=1 SV=1 - [1433T_RAT]	732.371	46.12	4	9	14	36	1.07234	18	6.98268	1.07991	18	5.91608	0.938766	18	4.71703	1	18	3.08579	0.959106	18	6.35172	0.994324	18	5.19316	0.941315	18	6.62524	0.967945	18	4.87424	1.07197	18	4.24278	245	27.7608	4.77979
B2GVB4	Sept9 protein (Fragment) OS=Rattus norvegicus OX=10116 GN=Sept9 PE=2 SV=1 - [B2GVB4_RAT]	730.52	34.18	16	2	19	35	1.18172	4	7.94126	1.13104	4	6.22856	0.982275	4	2.3361	0.974477	4	3.97394	0.925408	4	3.89248	0.942921	4	1.33359	0.943505	4	5.6501	0.949385	4	5.11591	1.08163	4	4.49339	550	61.993	8.1626
D3ZBN0	Histone H1.5 OS=Rattus norvegicus OX=10116 GN=H1-5 PE=1 SV=1 - [H15_RAT]	727.51	58.11	11	12	22	84	1.16261	48	7.61101	1.23549	48	10.0079	0.938397	48	5.35116	0.949295	48	3.71017	0.916807	48	6.50684	0.948872	48	6.26181	0.917589	48	7.75954	0.893093	48	8.87076	1.19822	48	10.3932	222	22.6355	10.9604
Q08163	Adenylyl cyclase-associated protein 1 OS=Rattus norvegicus OX=10116 GN=Cap1 PE=1 SV=3 - [CAP1_RAT]	723.879	35.23	4	14	14	31	0.979787	31	6.67698	0.98406	31	6.22828	1.03036	31	4.30634	1.0083	31	4.99212	1.00542	31	6.19012	0.988254	31	6.05669	1.01434	31	10.3633	1.0058	31	8.73501	0.972041	31	11.6253	474	51.5565	7.51807
Q6P6R2	Dihydrolipoyl dehydrogenase, mitochondrial OS=Rattus norvegicus OX=10116 GN=Dld PE=1 SV=1 - [DLDH_RAT]	723.8	18.27	5	9	9	23	0.938294	22	6.79874	0.946363	22	8.12449	1.03555	22	4.59025	1.05881	22	4.0643	1.01079	22	6.0844	1.0205	22	4.10324	1.01058	22	4.80778	0.991724	22	6.63935	0.95888	22	7.07352	509	54.0041	7.86963
Q63610	Tropomyosin alpha-3 chain OS=Rattus norvegicus OX=10116 GN=Tpm3 PE=1 SV=2 - [TPM3_RAT]	721.068	67.34	8	11	25	67	1.03986	21	7.23041	1.0689	21	5.94753	0.979769	21	4.43311	0.997335	21	3.25685	0.967436	21	6.30319	0.981808	21	5.07892	0.955176	21	6.26031	0.970511	21	7.19014	1.04929	21	8.72615	248	28.9887	4.77979
Q9EQS0	Transaldolase OS=Rattus norvegicus OX=10116 GN=Taldo1 PE=1 SV=2 - [TALDO_RAT]	719.474	46.59	5	18	19	41	0.926988	40	9.41793	0.940512	40	6.5406	1.05112	40	3.4607	1.06532	40	6.20066	0.991591	40	6.83187	1.07524	40	6.72844	0.974511	40	10.5041	0.993047	40	7.2204	0.940543	40	9.79808	337	37.4365	7.03467
P23358	60S ribosomal protein L12 OS=Rattus norvegicus OX=10116 GN=Rpl12 PE=2 SV=1 - [RL12_RAT]	719.223	61.21	6	10	10	26	0.974686	24	6.47065	0.965041	24	10.2374	1.03892	24	3.54351	1.00925	24	3.53998	1.01952	24	6.21271	0.987885	24	3.79423	1.01031	24	4.81684	1.02419	24	6.12088	0.970859	24	7.15188	165	17.8346	9.42236
P50878	60S ribosomal protein L4 OS=Rattus norvegicus OX=10116 GN=Rpl4 PE=1 SV=3 - [RL4_RAT]	719.073	42.99	22	22	25	61	0.982629	55	5.8293	0.997655	55	8.15101	1.02242	55	4.06453	1.03786	55	4.79759	0.99623	55	6.81557	1.02581	55	7.95456	0.984311	55	9.36099	0.968122	55	7.97497	0.990479	55	7.44571	421	47.227	10.9165
Q5XI73	Rho GDP-dissociation inhibitor 1 OS=Rattus norvegicus OX=10116 GN=Arhgdia PE=1 SV=1 - [GDIR1_RAT]	715.77	45.1	7	11	11	39	0.973033	37	5.92801	0.971101	37	7.38626	1.00743	37	5.33886	1.04278	37	4.39628	0.995718	37	7.18568	1.06403	37	5.16289	0.975408	37	6.00481	0.967678	37	6.83853	0.978225	37	9.16262	204	23.3928	5.19873
A0A0G2K174	LIM domain 7 OS=Rattus norvegicus OX=10116 GN=Lmo7 PE=1 SV=1 - [A0A0G2K174_RAT]	715.315	17.85	22	14	24	30	1.03738	16	9.38211	1.04517	16	7.39506	1.00192	16	6.43095	0.969974	16	3.85822	0.979539	16	8.76551	0.977171	16	5.35686	1.00389	16	7.13228	0.989299	16	3.90814	1.02642	16	8.43463	1395	156.668	6.21436
P62944	AP-2 complex subunit beta OS=Rattus norvegicus OX=10116 GN=Ap2b1 PE=1 SV=1 - [AP2B1_RAT]	705.703	24.76	7	12	27	44	1.02977	19	3.26556	1.03757	19	7.40076	0.980324	19	2.80606	0.9994	19	3.88074	0.975901	19	5.01252	1.00987	19	4.10947	0.980298	19	3.11457	0.982107	19	4.25139	1.07191	19	5.42092	937	104.486	5.37646
O35987	NSFL1 cofactor p47 OS=Rattus norvegicus OX=10116 GN=Nsfl1c PE=1 SV=1 - [NSF1C_RAT]	705.623	41.89	2	10	10	20	0.951998	20	5.95457	0.908144	20	9.40815	1.03245	20	4.41687	1.03587	20	5.93841	1.03898	20	7.74715	0.992163	20	7.94941	1.04265	20	8.2805	1.01089	20	5.02232	0.909318	20	10.2569	370	40.6554	5.14795
P02793	Ferritin light chain 1 OS=Rattus norvegicus OX=10116 GN=Ftl1 PE=1 SV=3 - [FRIL1_RAT]	704.393	59.02	10	8	8	25	0.475366	24	54.302	0.439457	24	44.9794	1.09383	24	10.5635	1.13393	24	12.4711	1.2257	24	14.5145	1.18223	24	14.7461	1.25406	24	7.88221	1.22476	24	6.79146	0.475435	24	36.6201	183	20.7357	6.43018
G3V7I8	Non-specific serine/threonine protein kinase OS=Rattus norvegicus OX=10116 GN=Slk PE=1 SV=1 - [G3V7I8_RAT]	699.229	16.96	8	1	18	27	1.02965	1		1.04154	1		1.05682	1		0.946676	1		0.94518	1		1.05795	1		0.970079	1		0.98904	1		0.988571	1		1203	137.556	5.021
P31977	Ezrin OS=Rattus norvegicus OX=10116 GN=Ezr PE=1 SV=3 - [EZRI_RAT]	698.695	38.23	25	20	31	67	1.04565	39	5.98488	1.02888	39	5.81584	1.00444	39	4.6864	1.00599	39	3.16257	0.975104	39	7.28585	1.00494	39	5.62976	0.959913	39	6.682	0.977534	39	5.92894	1.05344	39	10.8256	586	69.3476	6.1001
A0A0G2JVL8	Isoleucyl-tRNA synthetase OS=Rattus norvegicus OX=10116 GN=Iars PE=1 SV=1 - [A0A0G2JVL8_RAT]	698.678	15.39	4	16	16	30	0.836451	30	10.933	0.840141	30	7.74226	1.03444	30	3.3103	1.08628	30	3.65597	1.04608	30	4.72027	1.11179	30	5.13645	1.03888	30	3.34667	1.03977	30	4.56257	0.869322	30	7.18304	1254	143.491	6.354
A0A0G2JSQ4	Tropomyosin 1, alpha, isoform CRA_p OS=Rattus norvegicus OX=10116 GN=Tpm1 PE=1 SV=1 - [A0A0G2JSQ4_RAT]	698.205	65.73	8	3	22	58	1.03547	3	0.496337	1.03727	3	3.22027	1.04087	3	6.94414	0.989127	3	2.05616	0.96826	3	4.99732	0.981173	3	1.48261	0.98235	3	2.59825	0.972108	3	6.74393	1.02015	3	2.561	248	28.5395	4.76709
F1LPK7	Plastin 3 (T-isoform), isoform CRA_a OS=Rattus norvegicus OX=10116 GN=Pls3 PE=1 SV=2 - [F1LPK7_RAT]	696.048	30.63	27	17	19	38	0.9848	31	3.33454	0.985333	31	4.62451	1.01365	31	4.37391	1.00574	31	4.31998	1.04084	31	7.51094	1.00991	31	5.61756	1.02363	31	5.12134	1.00947	31	7.2603	0.963596	31	7.74815	630	70.7042	5.5415
P40329	Arginine--tRNA ligase, cytoplasmic OS=Rattus norvegicus OX=10116 GN=Rars1 PE=1 SV=2 - [SYRC_RAT]	695.442	31.67	10	20	21	32	0.936383	31	5.36904	0.952796	31	6.50281	1.03094	31	2.69203	1.0468	31	3.702	0.990869	31	8.24011	1.05309	31	4.29183	0.986548	31	8.11046	1.00227	31	7.3143	0.941534	31	10.597	660	75.762	7.04932
O35814	Stress-induced-phosphoprotein 1 OS=Rattus norvegicus OX=10116 GN=Stip1 PE=1 SV=1 - [STIP1_RAT]	691.538	39.78	1	26	27	54	0.975531	50	8.30397	0.995101	50	5.51321	1.01138	50	4.66407	1.03056	50	3.13152	0.989579	50	6.67905	1.04346	50	5.38813	0.967052	50	8.25228	0.979601	50	6.72225	1.02274	50	6.08387	543	62.5304	6.80029
Q63081	Protein disulfide-isomerase A6 OS=Rattus norvegicus OX=10116 GN=Pdia6 PE=1 SV=2 - [PDIA6_RAT]	689.791	33.41	3	16	17	33	1.21563	32	8.41376	1.24124	32	7.95263	0.913956	32	6.0168	0.900982	32	4.53471	0.932485	32	6.59245	0.91886	32	6.10692	0.917984	32	8.26326	0.920354	32	8.99837	1.20382	32	14.84	440	48.1433	5.13525
G3V9K0	Cysteinyl-tRNA synthetase OS=Rattus norvegicus OX=10116 GN=Cars PE=1 SV=1 - [G3V9K0_RAT]	688.228	25.8	11	2	17	26	0.846891	3	0.90237	0.838524	3	2.74825	1.0794	3	0.850993	1.07218	3	3.85097	1.04479	3	0.479573	1.09946	3	2.6467	1.04007	3	0.0958793	1.03855	3	0.00721274	0.799046	3	0.901637	748	85.5401	6.52197
G3V7U4	Lamin-B1 OS=Rattus norvegicus OX=10116 GN=Lmnb1 PE=1 SV=1 - [G3V7U4_RAT]	688.221	37.82	2	21	27	40	1.1314	28	6.72872	1.15781	28	9.16358	0.930268	28	6.95391	0.956563	28	4.50236	0.959677	28	12.8348	0.950049	28	5.56129	0.96934	28	10.986	0.950667	28	11.2415	1.11706	28	15.3992	587	66.6457	5.16064
F1M013	60S ribosomal protein L7a OS=Rattus norvegicus OX=10116 GN=Rpl7a PE=3 SV=2 - [F1M013_RAT]	686.279	39.25	21	11	16	32	0.997631	26	6.32503	1.01271	26	8.26332	1.01019	26	6.32725	1.00947	26	3.29373	1.01068	26	6.72647	1.00232	26	5.15271	1.01556	26	7.77746	0.996649	26	5.76222	1.01271	26	7.63133	265	29.846	10.6089
O08815	STE20-like serine/threonine-protein kinase OS=Rattus norvegicus OX=10116 GN=Slk PE=1 SV=1 - [SLK_RAT]	685.963	16.92	8	1	18	28	0.991295	2	0.25879	0.980404	2	1.57574	0.967511	2	2.44882	1.01315	2	7.88399	0.936728	2	0.603242	1.08056	2	0.0368275	0.921824	2	2.07981	1.05075	2	11.8019	1.07547	2	4.80925	1206	137.804	5.021
Q68FP1	Gelsolin OS=Rattus norvegicus OX=10116 GN=Gsn PE=1 SV=1 - [GELS_RAT]	683.516	27.31	1	24	25	39	1.08689	37	9.6321	1.11471	37	7.55767	0.980731	37	4.80537	0.979558	37	4.96392	0.972166	37	9.34365	0.966447	37	4.2529	0.982835	37	10.339	0.975176	37	9.1272	1.03813	37	13.4298	780	86.0141	6.0874
E9PU64	Adseverin OS=Rattus norvegicus OX=10116 GN=Scin PE=1 SV=1 - [E9PU64_RAT]	681.627	25.31	8	16	17	26	0.881289	24	6.88462	0.893502	24	3.7475	1.05147	24	4.04296	1.07624	24	5.62796	0.983423	24	6.58965	1.12917	24	6.5346	0.968224	24	6.31016	0.999917	24	6.29321	0.902196	24	5.14911	715	80.0923	5.94775
Q9JLJ3	4-trimethylaminobutyraldehyde dehydrogenase OS=Rattus norvegicus OX=10116 GN=Aldh9a1 PE=1 SV=1 - [AL9A1_RAT]	680.048	25.51	2	11	11	24	0.979037	24	6.5024	1.00906	24	5.90621	0.999115	24	4.91524	1.03879	24	2.63667	0.972421	24	6.72113	1.04034	24	4.57509	0.982733	24	5.85565	0.979577	24	4.32844	1.00715	24	6.49859	494	53.618	6.91748
D3ZA84	Talin 2 OS=Rattus norvegicus OX=10116 GN=Tln2 PE=1 SV=3 - [D3ZA84_RAT]	679.276	9.01	5	7	24	31	0.982387	7	10.6146	1.00991	7	3.60861	0.993951	7	2.20042	1.02526	7	3.29512	0.989338	7	8.73287	1.00432	7	8.08325	1.03361	7	7.26199	1.0188	7	9.79164	1.00801	7	2.57994	2542	271.514	5.5542
Q68FQ0	T-complex protein 1 subunit epsilon OS=Rattus norvegicus OX=10116 GN=Cct5 PE=1 SV=1 - [TCPE_RAT]	673.652	32.16	2	18	19	37	0.95854	36	5.93036	0.972834	36	4.48297	1.02117	36	4.12929	1.06156	36	3.26134	0.990168	36	6.12831	1.05353	36	3.70686	0.96511	36	5.74755	0.972035	36	5.05217	0.974732	36	6.61337	541	59.4988	5.71924
Q63002	Mannose 6-phosphate/insulin-like growth factor II receptor OS=Rattus norvegicus OX=10116 GN=M6P/IGF2r PE=2 SV=1 - [Q63002_RAT]	667.581	10.53	2	26	26	32	1.28134	32	11.0642	1.30502	32	13.1755	0.895372	32	5.57223	0.898819	32	7.69005	0.877996	32	10.4296	0.889052	32	6.59833	0.888022	32	10.0794	0.882341	32	9.77421	1.32805	32	13.4111	2479	273.222	5.68115
F1MA98	Nucleoprotein TPR OS=Rattus norvegicus OX=10116 GN=Tpr PE=1 SV=1 - [TPR_RAT]	667.316	11.27	4	23	26	28	1.01909	25	5.90115	0.996273	25	5.93184	0.986812	25	3.68152	0.998321	25	3.19437	0.994421	25	3.9166	1.00749	25	4.77805	0.993308	25	4.46363	1.00485	25	3.50979	1.0355	25	9.22674	2360	267.144	4.99561
P62828	GTP-binding nuclear protein Ran OS=Rattus norvegicus OX=10116 GN=Ran PE=1 SV=3 - [RAN_RAT]	665.666	37.96	7	9	9	25	0.96994	25	9.89329	0.938794	25	6.50849	1.03384	25	3.39415	1.04544	25	5.42569	0.99549	25	10.9823	1.03817	25	5.13899	1.01704	25	11.1342	1.01738	25	7.00906	0.947769	25	9.70183	216	24.4076	7.48877
Q4G061	Eukaryotic translation initiation factor 3 subunit B OS=Rattus norvegicus OX=10116 GN=Eif3b PE=1 SV=1 - [EIF3B_RAT]	656.065	30.49	17	18	19	25	0.98637	24	8.83063	0.976835	24	4.89407	1.00436	24	5.16798	1.01222	24	5.89483	1.02138	24	4.72626	1.02523	24	5.08871	0.984702	24	4.67059	1.00372	24	7.13211	1.01871	24	7.6093	797	90.854	5.08447
O08651	D-3-phosphoglycerate dehydrogenase OS=Rattus norvegicus OX=10116 GN=Phgdh PE=1 SV=3 - [SERA_RAT]	650.736	22.51	1	10	10	20	0.770651	20	12.6292	0.78974	20	15.4193	1.10188	20	5.85059	1.09527	20	5.56289	1.0848	20	6.60922	1.09981	20	5.11752	1.07284	20	4.85163	1.0738	20	7.10231	0.762644	20	16.9984	533	56.4572	6.7124
P48500	Triosephosphate isomerase OS=Rattus norvegicus OX=10116 GN=Tpi1 PE=1 SV=2 - [TPIS_RAT]	646.975	45.78	4	11	11	27	0.986	27	10.1904	0.986117	27	5.64473	1.013	27	7.18797	1.03456	27	6.9023	0.973686	27	14.7117	1.02816	27	6.56968	0.969301	27	12.9141	0.979766	27	8.73663	0.959415	27	15.1991	249	26.8318	7.23975
F1LN75	Septin-9 OS=Rattus norvegicus OX=10116 GN=Septin9 PE=1 SV=3 - [F1LN75_RAT]	645.333	32.69	16	1	18	32	1.06522	1		1.03848	1		0.943601	1		0.943885	1		0.971127	1		1.0516	1		1.01478	1		0.981418	1		1.06714	1		566	63.7598	8.6167
B2RYA5	Cysteinyl-tRNA synthetase (Fragment) OS=Rattus norvegicus OX=10116 GN=Cars PE=2 SV=1 - [B2RYA5_RAT]	641.55	27.48	1	1	15	23	0.839758	1		0.945456	1		1.04407	1		1.04599	1		0.982107	1		1.07492	1		1.04925	1		1.0477	1		0.905108	1		655	74.5705	6.37939
Q5RK10	60S ribosomal protein L13a OS=Rattus norvegicus OX=10116 GN=Rpl13a PE=1 SV=1 - [Q5RK10_RAT]	641.185	56.65	6	15	17	42	1.00441	38	5.93644	1.00949	38	4.15023	1.01321	38	3.64686	1.02205	38	5.22398	0.985117	38	4.42384	1.02979	38	6.31792	0.986448	38	5.15865	0.977544	38	5.09884	1.00146	38	9.16991	203	23.4314	11.019
F1LR10	LIM domain and actin-binding protein 1 OS=Rattus norvegicus OX=10116 GN=Lima1 PE=1 SV=2 - [LIMA1_RAT]	639.336	27.42	2	16	16	23	1.15452	23	8.8001	1.15978	23	9.04473	0.940446	23	3.98253	0.949371	23	3.21834	0.955177	23	8.41611	0.94248	23	6.10976	0.949061	23	9.50049	0.977023	23	7.78728	1.12016	23	13.5755	755	83.7459	6.25244
D3ZAN3	Alpha glucosidase 2 alpha neutral subunit (Predicted) OS=Rattus norvegicus OX=10116 GN=Ganab PE=1 SV=1 - [D3ZAN3_RAT]	630.512	13.43	1	10	10	28	0.954557	28	5.30623	0.953529	28	8.24592	1.03563	28	4.03585	1.03555	28	4.43395	0.992337	28	6.89259	1.05564	28	3.36998	0.999282	28	7.90703	0.989104	28	8.46789	0.969516	28	7.63732	797	90.5149	6.20166
P05708	Hexokinase-1 OS=Rattus norvegicus OX=10116 GN=Hk1 PE=1 SV=4 - [HXK1_RAT]	628.525	19.72	17	5	20	27	0.965623	7	4.39651	0.906748	7	1.93256	1.0657	7	1.97598	1.01652	7	1.61036	1.02645	7	6.84069	0.986641	7	2.17741	1.06275	7	2.75823	1.05464	7	5.63332	0.920501	7	9.52114	918	102.342	6.7124
P10760	Adenosylhomocysteinase OS=Rattus norvegicus OX=10116 GN=Ahcy PE=1 SV=3 - [SAHH_RAT]	623.717	24.07	2	10	11	23	0.998062	21	6.37772	1.02398	21	6.12976	0.989785	21	3.21324	1.04296	21	3.95301	0.985144	21	4.23498	1.02986	21	2.80512	0.973058	21	5.69447	0.965207	21	5.10689	1.02699	21	4.44092	432	47.5072	6.53662
P35565	Calnexin OS=Rattus norvegicus OX=10116 GN=Canx PE=1 SV=1 - [CALX_RAT]	622.538	35.36	3	21	22	53	0.969274	52	9.84936	0.953484	52	8.554	1.01241	52	5.70394	1.03068	52	4.98984	1.04544	52	7.96419	0.997662	52	6.43569	1.00927	52	9.95381	0.994834	52	7.21031	0.966584	52	12.7437	591	67.2126	4.62744
Q07009	Calpain-2 catalytic subunit OS=Rattus norvegicus OX=10116 GN=Capn2 PE=1 SV=3 - [CAN2_RAT]	619.934	23.71	3	14	15	22	1.06633	21	10.0731	1.01683	21	8.11911	0.992064	21	4.94035	1.00597	21	3.53928	0.975936	21	6.22842	0.999856	21	6.04554	0.960105	21	8.65934	0.966846	21	6.10542	1.06825	21	10.7979	700	79.8688	4.95752
G3V6D8	Myosin-3 OS=Rattus norvegicus OX=10116 GN=Myh3 PE=1 SV=1 - [G3V6D8_RAT]	615.606	14.74	44	11	29	34	1.20783	14	12.3086	1.2995	14	10.4819	0.909436	14	4.50298	0.912979	14	8.11384	0.878955	14	3.91841	0.920179	14	6.24518	0.883262	14	4.12739	0.875696	14	6.97961	1.29142	14	11.9924	1940	223.647	5.80811
A0A0G2K1L8	Brain acid soluble protein 1 OS=Rattus norvegicus OX=10116 GN=Basp1 PE=1 SV=1 - [A0A0G2K1L8_RAT]	614.826	73.97	2	1	13	21	1.04243	5	3.32433	1.02128	5	12.529	1.02557	5	2.09167	0.95489	5	3.70087	1.01183	5	5.47303	0.94974	5	2.25389	0.998281	5	9.03665	1.00992	5	4.41417	1.06068	5	10.977	219	21.7064	4.51318
Q6PDW1	40S ribosomal protein S12 OS=Rattus norvegicus OX=10116 GN=Rps12 PE=1 SV=1 - [Q6PDW1_RAT]	613.591	65.91	9	9	11	31	1.07618	27	14.987	1.10048	27	16.8307	1.00577	27	6.69761	1.07321	27	3.80294	0.85129	27	22.9865	1.04331	27	6.83386	0.861618	27	20.8698	0.902503	27	15.7626	1.09412	27	16.8872	132	14.5055	7.21045
P15178	Aspartate--tRNA ligase, cytoplasmic OS=Rattus norvegicus OX=10116 GN=Dars1 PE=1 SV=1 - [SYDC_RAT]	613.132	32.93	1	14	14	23	0.92311	23	8.04614	0.932127	23	6.22107	1.04482	23	4.25422	1.03597	23	2.78263	0.997781	23	4.94427	1.06588	23	5.20586	1.00951	23	4.49745	1.01982	23	3.55796	0.939932	23	7.07238	501	57.0902	6.44287
X1WI37	40S ribosomal protein S4 OS=Rattus norvegicus OX=10116 GN=Rps4x PE=1 SV=1 - [X1WI37_RAT]	612.196	41.6	4	12	13	27	0.980425	26	7.08403	0.97048	26	7.09105	1.02687	26	4.86383	1.02377	26	4.08552	1.01756	26	5.49823	1.02099	26	5.45494	1.00901	26	4.11997	1.02254	26	4.48847	0.930058	26	10.6095	262	29.448	10.1548
Q6AXS5	Plasminogen activator inhibitor 1 RNA-binding protein OS=Rattus norvegicus OX=10116 GN=Serbp1 PE=1 SV=2 - [PAIRB_RAT]	612.004	43.73	1	17	19	28	0.946763	26	6.98202	0.939711	26	8.49489	1.03084	26	4.80467	1.02903	26	5.04315	1.04075	26	6.61085	1.01689	26	3.7037	1.02823	26	7.45769	0.999354	26	5.8824	0.936531	26	9.32989	407	44.7273	8.54346
A0A0G2K0T6	Gamma-synuclein OS=Rattus norvegicus OX=10116 GN=Sncg PE=1 SV=1 - [A0A0G2K0T6_RAT]	610.852	74.8	5	9	9	23	1.06674	23	6.9038	1.08651	23	6.20366	0.954731	23	2.4039	0.974059	23	3.99331	0.981992	23	6.71662	0.954686	23	3.99731	0.979209	23	2.88896	0.978079	23	8.75516	1.10167	23	7.84476	123	13.0376	4.70361
P14668	Annexin A5 OS=Rattus norvegicus OX=10116 GN=Anxa5 PE=1 SV=3 - [ANXA5_RAT]	610.636	45.14	10	14	17	41	0.997889	33	5.97332	1.01599	33	7.96313	1.00428	33	6.62416	1.01841	33	3.13017	0.998697	33	6.41254	1.00657	33	5.53205	1.00065	33	6.41856	0.988775	33	5.47784	0.988172	33	11.8321	319	35.7223	5.04639
A0A0G2JSK5	Integrin beta OS=Rattus norvegicus OX=10116 GN=Itgb1 PE=1 SV=1 - [A0A0G2JSK5_RAT]	609.777	20.18	3	17	17	29	1.09363	29	9.66417	1.13689	29	11.6563	0.95902	29	5.93048	0.946955	29	3.95434	0.945107	29	6.99774	0.955639	29	5.87233	0.954862	29	8.27859	0.963704	29	5.71673	1.13355	29	12.3158	798	88.2864	6.01123
D3ZCR3	High mobility group protein B1 pseudogene OS=Rattus norvegicus OX=10116 GN=LOC108349189 PE=3 SV=2 - [D3ZCR3_RAT]	608.441	53.05	17	17	22	58	1.05595	49	8.52687	1.06897	49	8.26551	0.953693	49	6.37631	1.00295	49	4.44122	0.976419	49	7.25057	1.00965	49	5.06179	0.958339	49	10.2727	0.94756	49	11.3115	1.09176	49	13.3515	213	24.6621	6.15088
F1LUA1	Early endosome antigen 1 OS=Rattus norvegicus OX=10116 GN=Eea1 PE=1 SV=1 - [F1LUA1_RAT]	607.692	19.49	23	24	25	30	0.975906	29	5.96154	0.965903	29	6.76207	1.00766	29	3.63927	1.00185	29	6.88462	1.01233	29	5.63657	1.03808	29	4.06704	1.00574	29	4.38035	1.00333	29	6.76886	1.00395	29	10.017	1411	161.008	5.78271
P04762	Catalase OS=Rattus norvegicus OX=10116 GN=Cat PE=1 SV=3 - [CATA_RAT]	604.883	33.78	9	15	16	29	0.745449	28	13.7564	0.784861	28	16.1412	1.06508	28	3.00715	1.11073	28	8.19088	1.06312	28	4.84332	1.15143	28	10.1737	1.07981	28	6.47105	1.06144	28	4.30655	0.76037	28	12.9701	527	59.7195	7.50342
Q6P502	T-complex protein 1 subunit gamma OS=Rattus norvegicus OX=10116 GN=Cct3 PE=1 SV=1 - [TCPG_RAT]	601.772	36.33	2	23	23	40	0.946659	40	6.38537	0.963613	40	11.8639	1.02157	40	3.39224	1.03292	40	4.73372	1.02573	40	8.37635	1.03913	40	6.07091	1.01735	40	7.54061	1.0065	40	8.03332	0.941145	40	11.9218	545	60.6084	6.63916
Q3MID6	Calumenin OS=Rattus norvegicus OX=10116 GN=Calu PE=1 SV=1 - [Q3MID6_RAT]	600.343	33.65	2	2	9	27	1.08267	3	8.9841	1.10372	3	9.9168	0.977934	3	2.64543	1	3	0.870158	0.949663	3	2.31796	0.985907	3	0.208097	0.90844	3	9.08686	0.920899	3	4.48837	1.1136	3	8.97567	315	37.1244	4.60205
P61983	14-3-3 protein gamma OS=Rattus norvegicus OX=10116 GN=Ywhag PE=1 SV=2 - [1433G_RAT]	599.942	53.04	4	8	14	38	0.914419	18	5.79933	0.913944	18	7.75847	1.05587	18	7.08142	1.02092	18	5.44472	1.03528	18	7.36704	1.00271	18	8.58303	1.05273	18	6.90244	1.03085	18	7.24641	0.917578	18	11.8311	247	28.2849	4.89404
Q66HA8	Heat shock protein 105 kDa OS=Rattus norvegicus OX=10116 GN=Hsph1 PE=1 SV=1 - [HS105_RAT]	596.108	21.45	3	12	16	23	0.99536	16	5.86122	1.02337	16	4.84268	1.00063	16	2.60564	1.0071	16	3.56109	0.979903	16	8.69756	1.05085	16	3.77757	0.952559	16	5.79019	0.988934	16	3.56936	1.02906	16	8.53969	858	96.3574	5.5542
P11884	Aldehyde dehydrogenase, mitochondrial OS=Rattus norvegicus OX=10116 GN=Aldh2 PE=1 SV=1 - [ALDH2_RAT]	593.306	31.6	10	1	17	25	0.965223	1		0.95402	1		1.10846	1		1.09004	1		0.901687	1		1.0937	1		0.919568	1		0.96932	1		0.930584	1		519	56.4527	7.04932
A0A140TAG9	Hsp90 chaperone protein kinase-targeting subunit OS=Rattus norvegicus OX=10116 GN=Cdc37 PE=1 SV=1 - [A0A140TAG9_RAT]	589.808	30.69	3	12	13	21	0.946759	20	4.25341	0.920904	20	6.96922	1.0313	20	1.50996	1.02613	20	3.15458	1.02698	20	4.36186	1.03705	20	5.38106	0.99812	20	4.90343	1.04455	20	7.09064	0.932789	20	6.22469	378	44.1538	5.56689
D3ZRM9	60S ribosomal protein L13 OS=Rattus norvegicus OX=10116 GN=LOC100360491 PE=3 SV=1 - [D3ZRM9_RAT]	589.042	51.18	10	13	14	33	1.01052	29	7.03294	0.988643	29	9.64506	1.02579	29	4.60545	1.01621	29	4.03007	0.994973	29	7.47267	0.990486	29	6.32907	1.01294	29	11.6724	0.987201	29	9.81128	0.992587	29	11.6482	211	24.1874	11.4146
P37397	Calponin-3 OS=Rattus norvegicus OX=10116 GN=Cnn3 PE=1 SV=1 - [CNN3_RAT]	588.653	35.15	1	9	10	22	0.902304	18	3.31059	0.913132	18	5.36054	1.02602	18	3.31452	1.02596	18	3.54435	1.04642	18	5.22798	1.01844	18	5.12776	1.06747	18	5.40902	1.03793	18	7.28955	0.920128	18	8.77815	330	36.4118	5.71924
P81155	Voltage-dependent anion-selective channel protein 2 OS=Rattus norvegicus OX=10116 GN=Vdac2 PE=1 SV=2 - [VDAC2_RAT]	585.88	38.98	1	8	10	22	0.965625	18	6.5441	0.969169	18	8.72005	0.980412	18	4.15165	1.03	18	3.20596	0.989492	18	11.7467	1.03694	18	4.18062	0.997692	18	10.1553	1.00611	18	8.14428	0.967622	18	6.57156	295	31.7256	7.48877
F1LN88	Aldehyde dehydrogenase, mitochondrial OS=Rattus norvegicus OX=10116 GN=Aldh2 PE=1 SV=2 - [F1LN88_RAT]	585.493	31.02	10	1	17	25	0.910966	1		0.927056	1		1.0604	1		1.10742	1		0.946578	1		1.12026	1		0.94584	1		0.961214	1		0.941623	1		519	56.4807	7.32764
Q6AYC4	Macrophage-capping protein OS=Rattus norvegicus OX=10116 GN=Capg PE=1 SV=1 - [CAPG_RAT]	583.402	26.36	1	7	8	18	0.905225	16	3.21933	0.90455	16	8.57617	1.03925	16	5.4588	1.03822	16	2.87026	0.992665	16	10.0967	1.06149	16	9.02647	1.00378	16	7.86809	1.00908	16	4.76361	0.943691	16	8.60891	349	38.7746	6.55127
Q62920	PDZ and LIM domain protein 5 OS=Rattus norvegicus OX=10116 GN=Pdlim5 PE=1 SV=2 - [PDLI5_RAT]	583.307	32.99	1	14	14	22	0.964315	22	8.72382	0.976758	22	8.29772	0.982221	22	7.3389	1.00848	22	8.38445	1.02773	22	11.7641	1.04416	22	6.21325	1.00994	22	10.1648	1.01531	22	12.6492	0.974141	22	10.1268	591	63.1612	8.38232
Q64578	Sarcoplasmic/endoplasmic reticulum calcium ATPase 1 OS=Rattus norvegicus OX=10116 GN=Atp2a1 PE=1 SV=1 - [AT2A1_RAT]	582.192	9.05	5	1	11	19	1.27457	1		1.13842	1		1.03259	1		0.981374	1		0.781634	1		0.87332	1		1.15062	1		0.776614	1		1.15629	1		994	109.339	5.22412
Q4KM49	Tyrosine--tRNA ligase, cytoplasmic OS=Rattus norvegicus OX=10116 GN=Yars1 PE=2 SV=3 - [SYYC_RAT]	581.629	36.36	2	22	22	34	0.770773	34	6.29863	0.791895	34	9.58071	1.07177	34	3.33323	1.09774	34	5.05241	1.07917	34	4.23882	1.10772	34	5.66422	1.06335	34	5.70879	1.05785	34	6.223	0.8071	34	6.84848	528	59.078	7.00537
F8WFH8	T1-TrpRS OS=Rattus norvegicus OX=10116 GN=Wars PE=1 SV=1 - [F8WFH8_RAT]	580.583	28.21	3	13	13	20	0.715304	20	13.4454	0.724994	20	16.5791	1.09551	20	5.28062	1.15364	20	6.46399	1.0619	20	7.61324	1.14566	20	7.1663	1.04979	20	5.77263	1.05267	20	9.65084	0.762566	20	14.4409	475	53.3927	6.60986
Q6AYT3	RNA-splicing ligase RtcB homolog OS=Rattus norvegicus OX=10116 GN=Rtcb PE=2 SV=1 - [RTCB_RAT]	579.98	23.76	1	10	10	18	0.955499	18	5.27165	0.996737	18	6.7056	1.01288	18	4.895	1.02015	18	4.87163	0.979384	18	8.40898	1.05108	18	4.66056	0.954936	18	9.52306	1.01263	18	7.29727	1.00457	18	10.0458	505	55.2139	7.2251
P35213	14-3-3 protein beta/alpha OS=Rattus norvegicus OX=10116 GN=Ywhab PE=1 SV=3 - [1433B_RAT]	569.068	43.5	6	5	13	32	1.0841	9	7.22786	1.02418	9	5.92815	0.926615	9	7.51088	0.991813	9	9.68298	1.01586	9	7.77681	0.98554	9	4.15562	1.02298	9	10.0835	1.03792	9	3.77606	1.03373	9	10.103	246	28.0368	4.88135
Q5XHZ0	Heat shock protein 75 kDa, mitochondrial OS=Rattus norvegicus OX=10116 GN=Trap1 PE=1 SV=1 - [TRAP1_RAT]	566.014	17	1	9	10	19	0.929082	13	8.07362	0.913854	13	5.42074	1.04217	13	3.88935	1.04972	13	5.00735	1.00036	13	3.33539	1.03728	13	4.51868	0.985394	13	6.34408	1.01812	13	4.00742	0.955619	13	12.3352	706	80.4108	7.03467
Q09073	ADP/ATP translocase 2 OS=Rattus norvegicus OX=10116 GN=Slc25a5 PE=1 SV=3 - [ADT2_RAT]	565.396	40.27	7	8	15	29	0.980305	18	8.0668	0.990997	18	11.2796	1.00271	18	5.89147	1.04183	18	5.07337	0.982049	18	5.64192	1.06815	18	5.09369	0.971729	18	7.07596	1.00343	18	6.44115	0.96243	18	13.5363	298	32.8801	9.72998
P07153	Dolichyl-diphosphooligosaccharide--protein glycosyltransferase subunit 1 OS=Rattus norvegicus OX=10116 GN=Rpn1 PE=2 SV=1 - [RPN1_RAT]	563.189	30.74	11	19	22	34	1.02947	30	7.4253	1.02258	30	5.19801	0.972275	30	3.72535	1.01056	30	5.01496	0.985711	30	6.23702	0.999128	30	6.67488	0.975959	30	9.34937	0.973031	30	5.55035	1.05846	30	9.59245	605	68.2616	6.50732
Q62952	Dihydropyrimidinase-related protein 3 OS=Rattus norvegicus OX=10116 GN=Dpysl3 PE=1 SV=2 - [DPYL3_RAT]	563.105	21.23	2	7	11	23	0.973465	15	4.07094	1.01399	15	4.65277	0.996771	15	5.90959	1.04583	15	3.29735	0.962293	15	2.52715	1.08433	15	3.07051	0.946364	15	3.878	0.965082	15	4.66502	1.04469	15	5.42071	570	61.928	6.49365
Q64057	Alpha-aminoadipic semialdehyde dehydrogenase OS=Rattus norvegicus OX=10116 GN=Aldh7a1 PE=1 SV=2 - [AL7A1_RAT]	561.52	32.28	1	12	12	18	1.03425	18	4.13712	1.0374	18	8.02493	0.974555	18	3.28981	1.00537	18	3.87535	0.959088	18	5.03021	1.01776	18	5.33125	0.969089	18	8.23675	0.951883	18	6.7707	1.07175	18	11.9198	539	58.7114	7.86963
Q62667	Major vault protein OS=Rattus norvegicus OX=10116 GN=Mvp PE=1 SV=4 - [MVP_RAT]	560.222	18.35	4	16	16	22	0.84572	22	12.8276	0.842959	22	17.7992	1.06972	22	9.43747	1.10743	22	6.53854	1.02669	22	4.40408	1.08012	22	8.94196	1.02199	22	5.65598	1.01619	22	6.35784	0.865755	22	15.1867	861	95.7391	5.57959
G3V913	Heat shock 27 kDa protein OS=Rattus norvegicus OX=10116 GN=Hspb1 PE=1 SV=1 - [G3V913_RAT]	559.935	44.66	2	7	8	19	1.09158	18	10.9081	1.10412	18	6.82946	0.941687	18	4.14391	0.965733	18	3.02021	1.00378	18	8.51194	0.977544	18	8.198	0.968877	18	7.7201	0.97676	18	4.45277	1.15841	18	10.4434	206	22.7935	6.21436
D3ZUB0	Reticulocalbin 1 OS=Rattus norvegicus OX=10116 GN=Rcn1 PE=1 SV=1 - [D3ZUB0_RAT]	558.359	37.54	1	9	9	22	0.903474	22	9.51192	0.903407	22	4.86239	1.04746	22	3.50367	1.04134	22	6.01921	1.02262	22	5.66733	1.03991	22	5.59495	1.03013	22	8.7197	1.02604	22	5.83721	0.894529	22	9.14921	325	38.0666	4.81787
A0A140TAB3	Kinesin light chain OS=Rattus norvegicus OX=10116 GN=Klc1 PE=1 SV=1 - [A0A140TAB3_RAT]	556.067	29.53	11	14	15	24	1.10664	21	6.31337	1.1159	21	7.8274	0.946298	21	6.24201	0.980993	21	2.89081	0.942582	21	7.77912	0.985997	21	3.44515	0.922503	21	5.76781	0.939315	21	7.55237	1.10467	21	5.3482	552	62.8138	5.93506
P50475	Alanine--tRNA ligase, cytoplasmic OS=Rattus norvegicus OX=10116 GN=Aars1 PE=1 SV=3 - [SYAC_RAT]	555.512	20.04	7	18	20	30	0.805107	27	15.8748	0.782665	27	8.89624	1.07415	27	5.2527	1.09268	27	7.6564	1.06731	27	4.49555	1.09073	27	8.21627	1.06591	27	6.3728	1.08857	27	5.38138	0.780528	27	10.1505	968	106.723	5.61768
F2Z3Q8	Importin subunit beta-1 OS=Rattus norvegicus OX=10116 GN=Kpnb1 PE=1 SV=1 - [F2Z3Q8_RAT]	555.484	17.01	2	13	13	24	0.97873	24	3.8773	0.96111	24	6.46386	1.03535	24	3.95753	1.01402	24	4.54245	1.02631	24	5.07837	1.0196	24	6.26115	1.04122	24	4.29147	1.01241	24	5.01793	0.929873	24	11.2169	876	97.1221	4.77979
P13803	Electron transfer flavoprotein subunit alpha, mitochondrial OS=Rattus norvegicus OX=10116 GN=Etfa PE=1 SV=4 - [ETFA_RAT]	553.389	32.43	1	9	10	17	0.940534	16	8.14025	0.952357	16	8.50542	1.02226	16	5.41231	1.02117	16	4.85054	1.00788	16	5.39031	1.03859	16	5.86745	0.980706	16	13.3967	1.00837	16	9.3011	0.975871	16	7.46709	333	34.9295	8.38232
O35567	Bifunctional purine biosynthesis protein ATIC OS=Rattus norvegicus OX=10116 GN=Atic PE=1 SV=2 - [PUR9_RAT]	551.703	24.16	1	11	12	20	0.933487	19	7.81977	0.929337	19	6.2094	1.02624	19	4.66663	1.02203	19	6.0338	1.0275	19	7.81403	1.05748	19	4.40411	1.00041	19	5.99205	1.0027	19	7.35322	0.960304	19	8.74873	592	64.1682	7.13721
P04182	Ornithine aminotransferase, mitochondrial OS=Rattus norvegicus OX=10116 GN=Oat PE=1 SV=1 - [OAT_RAT]	550.6	29.84	6	12	14	25	0.984738	22	8.35075	1.00541	22	6.21474	1.00354	22	4.38507	1.0271	22	4.82797	0.970355	22	5.32661	1.024	22	5.05809	0.967124	22	5.4248	0.971785	22	5.81528	1.00919	22	5.98491	439	48.302	6.99072
B5DFK1	Coatomer subunit alpha OS=Rattus norvegicus OX=10116 GN=Copa PE=2 SV=1 - [B5DFK1_RAT]	548.085	20.83	11	24	25	39	1.06268	36	5.0591	1.05048	36	9.87227	0.973995	36	4.98609	1.00816	36	4.50882	0.952249	36	7.08027	1.01221	36	6.46314	0.942926	36	8.06887	0.953641	36	6.46499	1.12404	36	7.18593	1224	138.273	7.57666
Q6AXQ0	SUMO-activating enzyme subunit 1 OS=Rattus norvegicus OX=10116 GN=Sae1 PE=2 SV=1 - [SAE1_RAT]	547.818	25.5	1	9	9	13	1.00392	13	9.00569	1.01302	13	13.2848	0.986128	13	6.80418	1.02978	13	3.1486	1.00281	13	7.23504	1.00575	13	5.08018	0.976046	13	6.87463	0.97238	13	8.85816	1.01429	13	12.4014	349	38.4885	5.16064
Q68FR9	Elongation factor 1-delta OS=Rattus norvegicus OX=10116 GN=Eef1d PE=1 SV=2 - [EF1D_RAT]	546.52	37.72	13	10	13	22	0.980326	17	9.96745	0.953553	17	8.99482	1.02826	17	4.49489	1.02654	17	5.52614	1.01332	17	7.77655	1.00557	17	4.45694	0.998344	17	2.89483	0.99932	17	6.85843	0.971036	17	10.5881	281	31.3109	5.05908
Q499Q4	Phosphoglucomutase-1 OS=Rattus norvegicus OX=10116 GN=Pgm1 PE=1 SV=2 - [Q499Q4_RAT]	545.718	18.15	4	9	9	15	1.04095	15	7.3051	1.02414	15	4.98413	0.990964	15	4.508	1.00244	15	4.7811	0.995147	15	9.36847	1.02483	15	3.91298	1.00904	15	7.19886	0.989542	15	8.59338	1.01929	15	4.17179	562	61.3516	6.56592
Q5PQK2	FUS RNA-binding protein OS=Rattus norvegicus OX=10116 GN=Fus PE=1 SV=1 - [Q5PQK2_RAT]	543.999	19.11	1	7	11	30	1.12973	21	15.7272	1.11944	21	13.004	0.924184	21	15.0875	0.940327	21	5.75439	0.937146	21	14.2306	0.966607	21	4.41248	0.916265	21	19.1585	0.935628	21	12.7399	1.26032	21	19.9541	518	52.6415	9.36377
P09895	60S ribosomal protein L5 OS=Rattus norvegicus OX=10116 GN=Rpl5 PE=1 SV=3 - [RL5_RAT]	543.681	42.42	3	14	15	28	1.01272	27	6.87731	0.984727	27	8.57219	1.02214	27	4.73377	1.03583	27	5.38865	0.98781	27	9.4066	1.0065	27	5.80347	0.957478	27	10.755	0.982113	27	6.19731	1.00136	27	13.1846	297	34.4367	9.74463
Q5U2S7	Proteasome (Prosome, macropain) 26S subunit, non-ATPase, 3 OS=Rattus norvegicus OX=10116 GN=Psmd3 PE=1 SV=1 - [Q5U2S7_RAT]	543.597	26.98	3	12	14	23	0.964667	21	8.86712	0.978819	21	8.02474	1.03154	21	5.81876	1.02858	21	3.95451	1.0224	21	7.82597	1.03456	21	4.02105	1.00534	21	9.42477	1.01566	21	5.61135	0.992753	21	8.0275	530	60.6503	8.44092
Q80YG1	Phosphoserine aminotransferase OS=Rattus norvegicus OX=10116 PE=2 SV=1 - [Q80YG1_RAT]	542.926	41.89	3	16	16	22	0.874064	22	8.84421	0.890695	22	10.5449	1.0439	22	3.78357	1.07254	22	6.0007	1.02205	22	7.19595	1.08334	22	5.74184	1.02794	22	5.92898	1.02676	22	5.3853	0.863194	22	9.65039	370	40.5627	7.97217
D4AD15	Eukaryotic translation initiation factor 4 gamma, 1 OS=Rattus norvegicus OX=10116 GN=Eif4g1 PE=1 SV=2 - [D4AD15_RAT]	542.745	16.02	5	24	24	35	0.975702	35	5.60071	1.00564	35	5.0195	1.00823	35	3.96288	0.995904	35	4.8417	1.00275	35	6.52644	1.02587	35	3.92385	0.999232	35	7.67032	0.987598	35	6.61786	1.01538	35	8.46647	1592	174.979	5.36377
A0A0G2K7R1	Histone domain-containing protein OS=Rattus norvegicus OX=10116 PE=3 SV=1 - [A0A0G2K7R1_RAT]	540.574	31.36	2	1	6	69	0.914197	3	4.54221	1.03495	3	4.70204	1.15677	3	1.40564	1.01914	3	3.39321	1.08723	3	2.94734	0.917211	3	5.33569	1.04016	3	6.47789	0.927506	3	8.05033	0.908495	3	6.01193	118	13.126	10.3892
P13471	40S ribosomal protein S14 OS=Rattus norvegicus OX=10116 GN=Rps14 PE=2 SV=3 - [RS14_RAT]	540.168	43.71	5	7	7	21	0.969591	21	4.71546	0.96864	21	10.9514	0.98366	21	6.07004	1.05281	21	6.5714	0.995342	21	10.2202	1.02259	21	6.82229	1.00799	21	7.78052	0.996202	21	6.77926	0.988999	21	12.1086	151	16.2485	10.0522
F1M9V7	Aminopeptidase OS=Rattus norvegicus OX=10116 GN=Npepps PE=1 SV=1 - [F1M9V7_RAT]	539.723	20.43	2	17	17	21	1.03559	21	5.36855	1.05112	21	6.015	0.991017	21	3.3307	0.986898	21	3.01296	1.00012	21	9.17982	0.978374	21	6.31776	1.00103	21	6.51407	0.988051	21	5.52251	1.0083	21	11.5499	920	103.279	5.77002
M0R9L0	Nascent polypeptide-associated complex subunit alpha OS=Rattus norvegicus OX=10116 GN=Naca PE=1 SV=1 - [M0R9L0_RAT]	537.839	2.5	4	4	5	13	1.04558	12	7.5797	1.0734	12	8.78384	0.977544	12	6.69936	0.988307	12	4.27174	0.983182	12	4.84497	1.03366	12	6.60021	0.954246	12	5.1021	0.967112	12	5.6907	1.0742	12	9.49943	2163	220.062	9.31982
A0A0G2JTG7	Heterogeneous nuclear ribonucleoprotein H OS=Rattus norvegicus OX=10116 GN=Hnrnph1 PE=1 SV=1 - [A0A0G2JTG7_RAT]	531.952	24.5	5	9	11	24	1.19984	14	7.20107	1.21423	14	9.34044	0.941731	14	2.59308	0.939691	14	6.91332	0.908394	14	6.92176	0.954755	14	6.40883	0.915924	14	11.3848	0.914523	14	9.87606	1.19342	14	8.79656	449	49.1684	6.30322
Q794E4	Heterogeneous nuclear ribonucleoprotein F OS=Rattus norvegicus OX=10116 GN=Hnrnpf PE=1 SV=3 - [HNRPF_RAT]	530.905	17.59	1	4	6	20	1.00069	10	6.14848	1.02122	10	7.04954	0.962338	10	4.07138	1.02568	10	6.61649	0.958888	10	7.88698	1.04422	10	6.4561	0.973567	10	8.75388	0.993097	10	7.25499	1.02358	10	8.08995	415	45.7009	5.49072
Q00729	Histone H2B type 1-A OS=Rattus norvegicus OX=10116 GN=H2bc1 PE=1 SV=2 - [H2B1A_RAT]	528.934	58.27	6	1	10	70	0.980875	1		0.964521	1		1.07475	1		0.98806	1		1.01918	1		0.996823	1		1.03294	1		0.972463	1		0.97291	1		127	14.2157	10.2866
A0A0G2K7B3	Heterogeneous nuclear ribonucleoproteins C1/C2-like OS=Rattus norvegicus OX=10116 GN=LOC100911576 PE=1 SV=1 - [A0A0G2K7B3_RAT]	528.74	35	8	13	14	29	1.0533	28	7.22058	1.08078	28	9.4767	0.986451	28	3.69218	0.982036	28	3.22217	0.996071	28	7.25921	0.970815	28	7.18509	0.967869	28	7.53447	0.963864	28	5.52682	1.03837	28	9.76417	300	33.0362	5.03369
Q499P2	Leukotriene A(4) hydrolase OS=Rattus norvegicus OX=10116 GN=Lta4h PE=1 SV=1 - [Q499P2_RAT]	525.272	35.02	3	18	19	27	1.0279	25	7.68312	1.02515	25	5.03859	0.974132	25	6.6489	1.01156	25	4.56403	0.985963	25	7.62384	1.02723	25	4.29192	0.974253	25	6.87261	0.991369	25	8.25587	1.05868	25	5.7874	611	69.0451	6.20166
Q9Z1W6	Protein LYRIC OS=Rattus norvegicus OX=10116 GN=Mtdh PE=1 SV=2 - [LYRIC_RAT]	525.142	24.1	1	11	11	16	0.966518	16	8.27215	0.97789	16	6.37465	1.00038	16	4.63435	1.00668	16	5.63378	1.07381	16	8.59851	1.00244	16	5.39665	1.09295	16	7.29512	1.03535	16	6.19114	0.939491	16	8.38329	581	63.9307	9.29053
P50503	Hsc70-interacting protein OS=Rattus norvegicus OX=10116 GN=St13 PE=1 SV=1 - [F10A1_RAT]	523.032	26.9	3	13	13	24	1.00031	24	6.76882	1.0137	24	4.92832	1.00064	24	3.76696	1.02545	24	3.7535	0.991919	24	5.87399	1.03173	24	4.74994	0.973554	24	3.49149	0.957549	24	5.3685	1.00136	24	8.27223	368	41.2534	5.38916
P07895	Superoxide dismutase [Mn], mitochondrial OS=Rattus norvegicus OX=10116 GN=Sod2 PE=1 SV=2 - [SODM_RAT]	518.828	26.13	2	7	7	27	0.921807	27	10.2347	0.929077	27	5.19037	1.09504	27	6.71704	1.12279	27	4.68186	0.936973	27	6.37647	1.11638	27	7.35168	0.916939	27	7.29494	0.916621	27	9.50851	0.962582	27	9.36876	222	24.6586	8.80713
Q4V7C7	Actin-related protein 3 OS=Rattus norvegicus OX=10116 GN=Actr3 PE=1 SV=1 - [ARP3_RAT]	516.28	31.82	4	13	13	24	1.01457	24	5.72959	0.993554	24	14.1798	1.01785	24	6.14319	0.994275	24	4.36342	0.996631	24	12.7557	1.02153	24	7.2661	0.996279	24	10.2125	1.01249	24	9.09984	1.02977	24	11.3551	418	47.327	5.88428
F1LQN3	Reticulon OS=Rattus norvegicus OX=10116 GN=Rtn4 PE=1 SV=1 - [F1LQN3_RAT]	514.832	10.66	9	5	7	21	1.01255	17	7.16353	0.988403	17	9.65723	1.00658	17	6.03543	0.985805	17	2.86657	0.972993	17	2.48587	0.985604	17	5.55274	1.00956	17	6.67968	0.991432	17	4.10984	1.09187	17	5.97067	1163	126.324	4.48779
B2GUZ5	F-actin-capping protein subunit alpha-1 OS=Rattus norvegicus OX=10116 GN=Capza1 PE=1 SV=1 - [CAZA1_RAT]	513.711	49.65	1	6	9	15	0.978144	11	4.33297	1.03129	11	5.13938	1.02742	11	3.91066	1.02294	11	7.54287	0.965778	11	4.21655	1.02528	11	6.52075	0.970429	11	8.79305	0.96099	11	7.29865	1.03613	11	8.73211	286	32.8893	5.69385
A0A0G2JSS8	Peroxiredoxin-5 OS=Rattus norvegicus OX=10116 GN=Prdx5 PE=1 SV=1 - [A0A0G2JSS8_RAT]	513.631	31.46	2	7	7	18	0.753355	18	7.90725	0.724898	18	7.56711	1.14398	18	2.51032	1.14085	18	3.96075	1.03941	18	4.0575	1.12596	18	5.09494	1.05627	18	5.35751	1.03363	18	5.90924	0.717944	18	10.0466	213	22.1926	8.66064
P05370	Glucose-6-phosphate 1-dehydrogenase OS=Rattus norvegicus OX=10116 GN=G6pdx PE=1 SV=3 - [G6PD_RAT]	513.295	30.1	5	14	15	25	0.791243	24	11.2814	0.78572	24	8.62711	1.0783	24	4.43597	1.12609	24	6.68299	1.03879	24	6.30963	1.13504	24	5.33287	1.05523	24	7.41428	1.02931	24	6.03165	0.792319	24	8.14767	515	59.3378	6.37939
A0A0G2JTG1	10 kDa heat shock protein, mitochondrial OS=Rattus norvegicus OX=10116 GN=Hspe1 PE=1 SV=1 - [A0A0G2JTG1_RAT]	511.494	70.79	7	7	7	21	1.03078	19	3.06445	1.02263	19	11.7443	0.976557	19	4.24105	0.999282	19	3.4676	0.995522	19	9.73762	0.994851	19	4.03694	0.980663	19	7.61356	0.995393	19	7.1716	1.01302	19	10.7144	89	9.38221	9.70068
Q5XFX0	Transgelin-2 OS=Rattus norvegicus OX=10116 GN=Tagln2 PE=1 SV=1 - [TAGL2_RAT]	510.318	50.75	1	11	12	30	0.965	27	8.60671	0.961272	27	7.48063	1.03636	27	7.89771	0.991425	27	4.94009	1.05626	27	12.5572	0.996449	27	7.68379	1.06882	27	12.6236	1.01718	27	7.87218	0.869507	27	15.1746	199	22.3791	8.25049
D3ZPR0	Chromosome segregation 1-like protein OS=Rattus norvegicus OX=10116 GN=Cse1l PE=1 SV=1 - [D3ZPR0_RAT]	507.714	12.05	1	11	11	18	1.10319	18	6.77488	1.09293	18	5.65714	0.996686	18	4.39164	1.0031	18	2.45219	0.926225	18	8.83094	1.0129	18	3.49714	0.925295	18	7.7504	0.941675	18	6.742	1.11346	18	11.4083	971	110.144	5.77002
Q9WUH4	Four and a half LIM domains protein 1 OS=Rattus norvegicus OX=10116 GN=Fhl1 PE=2 SV=1 - [FHL1_RAT]	507.028	43.57	5	11	13	22	1.26068	19	7.98448	1.23266	19	9.68634	0.903784	19	8.89762	0.928501	19	6.04581	0.91815	19	6.74231	0.916256	19	6.45969	0.897235	19	5.19734	0.910774	19	7.40234	1.32324	19	11.1343	280	31.8819	8.36768
F1LV13	Heterogeneous nuclear ribonucleoprotein M OS=Rattus norvegicus OX=10116 GN=Hnrnpm PE=1 SV=1 - [F1LV13_RAT]	506.506	34.78	4	26	26	42	1.12532	42	9.94917	1.08219	42	11.606	0.968912	42	4.70097	0.964945	42	3.85567	0.954294	42	10.6943	0.950072	42	4.77035	0.968961	42	12.7029	0.944212	42	13.1231	1.09538	42	16.7397	690	73.6734	8.74854
Q5XIE0	Acidic leucine-rich nuclear phosphoprotein 32 family member E OS=Rattus norvegicus OX=10116 GN=Anp32e PE=2 SV=1 - [AN32E_RAT]	503.26	17.05	1	5	5	15	1.13735	15	15.1477	1.11835	15	19.0358	0.950144	14	7.8354	0.95682	15	7.47586	0.934205	15	15.3156	0.942183	15	7.17532	0.95945	15	8.77347	1.01512	13	9.23821	1.11098	15	11.2897	258	29.4003	3.89111
M0RAQ6	Hexokinase OS=Rattus norvegicus OX=10116 GN=Hk1 PE=1 SV=2 - [M0RAQ6_RAT]	503.212	15.45	12	1	15	18	0.97458	1		0.9375	1		1.02774	1		1.06321	1		1.03867	1		0.989914	1		1.03405	1		1.0163	1		0.899	1		893	99.4931	7.13721
D3ZFP4	DNA helicase OS=Rattus norvegicus OX=10116 GN=Mcm3 PE=1 SV=3 - [D3ZFP4_RAT]	500.834	21.03	4	14	15	20	1.33468	19	12.8187	1.37583	19	16.5513	0.91174	19	9.16288	0.868368	19	5.74421	0.865249	19	12.4791	0.860829	19	5.58656	0.856557	19	18.0816	0.892957	19	13.7692	1.35745	19	11.7528	813	91.6023	5.47803
G3V9N0	Polyadenylate-binding protein OS=Rattus norvegicus OX=10116 GN=Pabpc4 PE=1 SV=2 - [G3V9N0_RAT]	499.523	23.29	4	8	15	22	0.990749	11	4.50472	0.980062	11	4.59019	0.984359	11	3.39302	1.02284	11	2.0981	1.01816	11	3.73184	1.0371	11	5.66529	0.991018	11	1.75186	1.00856	11	3.35479	0.966394	11	7.08734	644	70.789	9.26123
E9PT29	RNA helicase OS=Rattus norvegicus OX=10116 GN=Ddx17 PE=1 SV=3 - [E9PT29_RAT]	498.275	21.54	3	1	15	19	1.18373	1		1.3111	1		1.06827	1		0.955364	1		0.84264	1		0.964992	1		0.843037	1		0.938627	1		1.01679	1		650	72.414	8.5874
P18418	Calreticulin OS=Rattus norvegicus OX=10116 GN=Calr PE=1 SV=1 - [CALR_RAT]	497.473	41.59	1	18	18	49	1.07686	49	9.97821	1.07493	49	9.71609	0.983364	49	5.2158	1.01056	49	6.52473	0.936387	49	10.2615	1.00269	49	6.20591	0.916393	49	10.8685	0.933701	49	9.4949	1.12069	49	8.19075	416	47.9658	4.48779
P68101	Eukaryotic translation initiation factor 2 subunit 1 OS=Rattus norvegicus OX=10116 GN=Eif2s1 PE=1 SV=2 - [IF2A_RAT]	496.398	35.87	3	10	10	15	0.967114	15	2.81275	0.948452	15	7.30312	1.02228	15	3.89971	1.04794	15	3.03057	1.00754	15	4.51409	1.03923	15	4.27617	1.0067	15	7.67149	1.02692	15	7.04263	0.932262	15	5.38067	315	36.0854	5.08447
P29266	3-hydroxyisobutyrate dehydrogenase, mitochondrial OS=Rattus norvegicus OX=10116 GN=Hibadh PE=1 SV=3 - [3HIDH_RAT]	495.744	19.1	1	5	5	12	1.01907	12	5.75099	1.03268	12	4.75651	0.973099	12	2.26896	0.968642	12	1.18099	1.00278	12	4.91808	1.01635	12	2.19397	0.981724	12	2.75973	0.961618	12	3.1439	1.07272	12	4.23173	335	35.2796	8.47021
Q9QVC8	Peptidyl-prolyl cis-trans isomerase FKBP4 OS=Rattus norvegicus OX=10116 GN=Fkbp4 PE=1 SV=3 - [FKBP4_RAT]	495.614	27.29	4	14	14	24	1.01361	24	6.6799	1.00553	24	6.63287	1.01767	24	3.8048	0.996537	24	4.9518	0.980304	24	7.90344	1.0014	24	4.54747	1.02009	24	7.15909	1.00049	24	7.05952	1.00417	24	11.8041	458	51.4178	5.61768
Q62658	Peptidyl-prolyl cis-trans isomerase FKBP1A OS=Rattus norvegicus OX=10116 GN=Fkbp1a PE=1 SV=3 - [FKB1A_RAT]	494.246	39.81	10	4	5	13	0.955873	11	2.35469	1.01334	11	7.28025	1.01803	11	2.51989	0.977619	11	5.73346	0.99994	11	7.23974	0.972218	11	6.00999	1.03408	11	9.63691	1.03835	11	3.06671	1.02128	11	6.99676	108	11.9151	8.1626
P13668	Stathmin OS=Rattus norvegicus OX=10116 GN=Stmn1 PE=1 SV=2 - [STMN1_RAT]	493.405	75.17	14	14	16	39	1.16136	37	12.4335	1.15795	37	8.60133	0.96102	37	4.86161	0.97783	37	5.31249	0.90429	37	9.09045	0.953567	37	6.70234	0.937581	37	8.72808	0.907232	37	10.0009	1.19267	37	12.3756	149	17.2779	5.97314
A0A0G2JTW5	26S proteasome non-ATPase regulatory subunit 1 OS=Rattus norvegicus OX=10116 GN=Psmd1 PE=1 SV=1 - [A0A0G2JTW5_RAT]	493.285	15.65	27	12	13	18	0.980661	17	5.42479	1.00841	17	8.00819	0.971639	17	5.88125	1.00867	17	3.2599	1.02335	17	3.9185	1.00131	17	3.06762	1.0126	17	6.81178	1.0062	17	2.507	0.959028	17	6.85964	952	105.559	5.38916
Q566E4	Heterogeneous nuclear ribonucleoprotein R OS=Rattus norvegicus OX=10116 GN=Hnrnpr PE=1 SV=1 - [Q566E4_RAT]	492.47	22.63	8	6	18	34	1.04809	7	10.0146	1.02595	7	6.16127	1.01407	7	5.61894	0.969449	7	1.3395	1.0129	7	4.13975	0.982262	7	4.48321	0.980156	7	8.43144	0.978888	7	4.33953	1.0589	7	7.4019	632	70.8302	8.1333
Q4FZT9	26S proteasome non-ATPase regulatory subunit 2 OS=Rattus norvegicus OX=10116 GN=Psmd2 PE=1 SV=1 - [PSMD2_RAT]	491.585	13.44	1	13	13	23	0.965558	23	9.07656	0.996061	23	9.91035	1.0133	23	6.46256	1.00314	23	7.00753	1.02265	23	10.1088	1.00616	23	8.30566	0.998135	23	9.37397	0.9921	23	8.45718	0.975152	23	11.8282	908	100.124	5.19873
B5DFC8	Eukaryotic translation initiation factor 3 subunit C OS=Rattus norvegicus OX=10116 GN=Eif3c PE=1 SV=1 - [EIF3C_RAT]	485.885	19.98	2	18	19	25	0.983492	24	7.35907	0.987454	24	9.04242	1.01006	24	3.00348	1.03435	24	4.06883	0.991195	24	7.46086	1.03737	24	6.24513	0.994757	24	6.29515	1.01752	24	7.19998	0.956757	24	7.26284	911	105.369	5.78271
A0A0G2JSR0	Voltage-dependent anion-selective channel protein 3 OS=Rattus norvegicus OX=10116 GN=Vdac3 PE=1 SV=1 - [A0A0G2JSR0_RAT]	484.083	48.41	2	8	10	19	1.08244	15	10.7814	1.102	15	9.44906	0.9588	15	1.92336	1.02491	15	4.79067	0.9261	15	10.9987	1.04133	15	7.45979	0.919782	15	11.306	0.915459	15	12.2854	1.08038	15	7.26376	283	30.7643	8.5874
G3V7L6	26S proteasome AAA-ATPase subunit RPT1 OS=Rattus norvegicus OX=10116 GN=Psmc2 PE=1 SV=1 - [G3V7L6_RAT]	480.75	34.18	2	15	15	22	1.0068	22	8.27104	1.01392	22	6.08619	1.00559	22	3.39565	1.0109	22	4.46535	0.994917	22	4.67622	1.0127	22	6.24422	1.00015	22	4.75395	0.996097	22	6.80002	1.02839	22	7.68835	433	48.6031	5.94775
P12001	60S ribosomal protein L18 OS=Rattus norvegicus OX=10116 GN=Rpl18 PE=1 SV=2 - [RL18_RAT]	480.115	28.72	4	6	6	14	0.916207	14	5.96272	0.925861	14	6.49318	1.05955	14	3.14131	0.977435	14	3.82992	1.09568	14	9.6814	0.995348	14	7.33645	1.05228	14	12.511	1.08022	14	5.55833	0.876667	14	14.5919	188	21.6452	11.7808
Q05962	ADP/ATP translocase 1 OS=Rattus norvegicus OX=10116 GN=Slc25a4 PE=1 SV=3 - [ADT1_RAT]	479.796	40.94	8	8	15	25	1.05906	14	6.18409	0.977555	14	8.20048	0.982581	14	6.00319	1.04308	14	2.4009	0.984187	14	7.02491	1.04594	14	2.62992	0.927154	14	8.28563	0.968303	14	8.69081	1.07726	14	12.438	298	32.9682	9.78857
Q5XIH7	Prohibitin-2 OS=Rattus norvegicus OX=10116 GN=Phb2 PE=1 SV=1 - [PHB2_RAT]	478.046	42.14	2	13	13	22	0.928908	22	7.11269	0.916523	22	7.69939	1.0512	22	4.13636	1.05943	22	4.11169	1.02952	22	5.02719	1.02487	22	5.89338	1.02201	22	3.92733	1.0431	22	4.79606	0.898046	22	9.10775	299	33.2919	9.83252
D4A1B9	Structural maintenance of chromosomes protein OS=Rattus norvegicus OX=10116 GN=Smc3 PE=1 SV=1 - [D4A1B9_RAT]	477.078	18.24	3	19	20	26	1.15507	24	8.92746	1.18533	24	8.06774	0.942516	24	5.59097	0.947251	24	3.87947	0.93824	24	7.81356	0.949347	24	5.47941	0.928507	24	8.35778	0.942796	24	4.89601	1.15943	24	11.578	1217	141.454	7.18115
P63029	Translationally-controlled tumor protein OS=Rattus norvegicus OX=10116 GN=Tpt1 PE=1 SV=1 - [TCTP_RAT]	476.604	33.14	2	6	6	20	1.00624	20	10.2903	1.05441	20	6.69871	0.986268	20	6.78421	1.03398	20	3.5682	0.958178	20	11.2571	1.0408	20	7.08574	0.949062	20	9.25003	0.948208	20	6.8735	1.09642	20	12.2137	172	19.4496	4.85596
Q6PDV8	60S ribosomal protein L22 OS=Rattus norvegicus OX=10116 GN=LOC100360057 PE=1 SV=1 - [Q6PDV8_RAT]	475.534	35.16	2	4	4	13	0.976353	13	5.71754	0.998582	13	3.97923	1.0265	13	6.20301	1.0332	13	1.90774	1.02673	13	3.74898	1.01032	13	2.2931	1.00901	13	4.03189	1.00583	13	4.36557	0.944767	13	6.69174	128	14.7498	9.18799
P56571	ES1 protein homolog, mitochondrial OS=Rattus norvegicus OX=10116 PE=1 SV=2 - [ES1_RAT]	475.106	43.23	2	8	9	19	0.911376	17	5.2934	0.942688	17	6.5586	1.02811	17	3.10119	1.04294	17	5.07302	1.00639	17	7.95171	1.03362	17	4.52804	0.996084	17	12.3894	1.00314	17	5.54668	0.941378	17	8.92676	266	28.1549	8.92432
G3V8G5	Golgi apparatus protein 1 OS=Rattus norvegicus OX=10116 GN=Glg1 PE=1 SV=1 - [G3V8G5_RAT]	474.494	11.96	2	12	13	19	1.1553	18	12.0034	1.1068	18	16.8027	0.99906	18	2.9275	1.02371	18	2.72014	0.948057	18	6.182	0.995178	18	5.26054	0.976077	18	7.42844	0.928304	18	12.4795	1.03887	18	11.8077	1171	133.465	6.90283
Q5PPJ6	Leucyl-tRNA synthetase OS=Rattus norvegicus OX=10116 GN=Lars PE=1 SV=1 - [Q5PPJ6_RAT]	473.169	12.05	11	11	14	20	0.825068	15	10.5267	0.814105	15	14.8941	1.06059	15	5.97025	1.04945	15	6.87486	1.0973	15	7.88273	1.06635	15	5.09758	1.07026	15	2.66245	1.08519	15	3.07758	0.797733	15	15.353	1178	134.192	7.28369
Q5XIM9	T-complex protein 1 subunit beta OS=Rattus norvegicus OX=10116 GN=Cct2 PE=1 SV=3 - [TCPB_RAT]	472.63	31.59	2	20	20	31	0.932049	31	9.21278	0.940259	31	6.21762	1.03522	31	3.35746	1.03379	31	4.49065	1.02687	31	4.511	1.03036	31	3.7311	1.01604	31	8.59899	1.02245	31	6.69566	0.940732	31	9.9453	535	57.4221	6.45557
D3Z941	Methionine--tRNA ligase, cytoplasmic OS=Rattus norvegicus OX=10116 GN=Mars PE=1 SV=1 - [D3Z941_RAT]	471.345	19.4	1	16	16	19	0.838225	19	10.5046	0.840704	19	8.23064	1.06462	19	3.94612	1.06761	19	5.8146	1.04017	19	7.70938	1.05493	19	8.22096	1.04913	19	7.1982	1.04819	19	4.54217	0.85031	19	16.43	902	101.517	6.45557
M0R907	Small nuclear ribonucleoprotein Sm D3 OS=Rattus norvegicus OX=10116 GN=Snrpd3 PE=1 SV=1 - [M0R907_RAT]	471.186	40.48	1	3	3	8	1.05815	8	9.16558	1.00636	8	8.74039	1.01368	8	4.19235	1.01962	8	4.7644	0.910014	8	4.93421	1.03822	8	4.72987	0.938328	8	4.57974	0.991912	8	8.41711	1.10868	8	11.6521	126	13.9073	10.3159
Q63525	Nuclear migration protein nudC OS=Rattus norvegicus OX=10116 GN=Nudc PE=1 SV=1 - [NUDC_RAT]	470.369	41.57	3	15	16	32	0.92222	31	7.40731	0.935764	31	7.89077	1.02653	31	4.88412	1.05431	31	4.06718	1.04226	31	5.59104	1.03643	31	4.25704	1.00714	31	7.91853	1.0198	31	5.28065	0.943162	31	11.4165	332	38.3883	5.37646
Q5XI32	F-actin-capping protein subunit beta OS=Rattus norvegicus OX=10116 GN=Capzb PE=1 SV=1 - [CAPZB_RAT]	469.308	30.15	2	9	9	17	0.980836	17	4.62994	0.979119	17	8.98325	1.0154	17	6.7244	1.00051	17	6.72152	1.00194	17	12.7679	1.00583	17	8.31493	1.00276	17	8.48628	1.03136	17	6.32505	0.950795	17	22.2814	272	30.6094	5.99854
M3ZCQ2	U5 small nuclear ribonucleoprotein 200 kDa helicase OS=Rattus norvegicus OX=10116 GN=Snrnp200 PE=1 SV=1 - [M3ZCQ2_RAT]	468.298	8.15	7	16	17	20	0.97256	19	5.07176	1.01239	19	8.23806	1.0102	19	3.24251	0.995553	19	3.78278	0.977687	19	5.63502	1.02403	19	2.72607	0.991314	19	9.13874	0.965503	19	5.64169	0.998115	19	8.99689	2136	244.38	6.06201
A0A096MIX2	RNA helicase OS=Rattus norvegicus OX=10116 GN=Ddx17 PE=1 SV=1 - [A0A096MIX2_RAT]	467.517	21.32	1	1	15	19	1.09808	1		1.10986	1		0.998327	1		0.986631	1		0.990259	1		0.943129	1		0.900849	1		0.926631	1		1.16157	1		652	72.5991	8.67529
P85845	Fascin OS=Rattus norvegicus OX=10116 GN=Fscn1 PE=1 SV=2 - [FSCN1_RAT]	467.106	24.14	2	1	11	23	1.16008	3	2.90827	1.18404	3	8.35413	1.02892	3	4.59039	1.01855	3	1.65651	0.926439	3	6.57862	0.994536	3	1.29279	0.889189	3	4.93818	0.877758	3	0.942104	1.14799	3	1.47553	493	54.4569	6.7417
Q52KS1	ATP-dependent 6-phosphofructokinase OS=Rattus norvegicus OX=10116 GN=Pfkm PE=1 SV=1 - [Q52KS1_RAT]	461.839	15.13	8	7	10	15	1.0701	11	5.47893	1.06708	11	9.09416	0.964521	11	3.29502	0.97846	11	2.6325	0.971004	11	4.85283	0.993568	11	3.22705	0.960925	11	5.39014	0.974682	11	4.74594	1.07269	11	5.8595	780	85.2886	7.88428
P83868	Prostaglandin E synthase 3 OS=Rattus norvegicus OX=10116 GN=Ptges3 PE=1 SV=2 - [TEBP_RAT]	460.449	23.75	2	3	3	16	1.09354	16	6.77379	1.03637	16	8.85846	1.0666	16	5.76855	1.0345	16	5.50909	0.931641	16	9.51549	1.01833	16	2.9161	0.899121	16	6.57219	0.928719	16	7.90203	1.08376	16	4.09283	160	18.7094	4.55127
P54001	Prolyl 4-hydroxylase subunit alpha-1 OS=Rattus norvegicus OX=10116 GN=P4ha1 PE=2 SV=2 - [P4HA1_RAT]	459.581	27.15	2	14	15	24	1.04107	23	7.37376	1.08437	23	9.00332	0.984552	23	8.05816	0.98633	23	5.12451	0.976129	23	7.39309	0.994929	23	7.96438	0.952245	23	6.39222	0.962558	23	4.5145	1.10613	23	9.34054	534	60.8596	5.89697
P15650	Long-chain specific acyl-CoA dehydrogenase, mitochondrial OS=Rattus norvegicus OX=10116 GN=Acadl PE=1 SV=1 - [ACADL_RAT]	457.6	18.84	17	5	7	11	0.957518	9	3.5814	0.942731	9	6.02703	1.01576	9	1.92934	0.997964	9	6.56408	1.05639	9	8.43727	1.02046	9	5.97179	1.06408	9	13.5566	1.00629	9	5.22839	0.945124	9	12.1658	430	47.8424	7.73779
P54921	Alpha-soluble NSF attachment protein OS=Rattus norvegicus OX=10116 GN=Napa PE=1 SV=2 - [SNAA_RAT]	457.276	34.58	3	9	9	14	1.0402	14	5.36105	1.09089	14	10.1184	0.941943	14	7.0734	1.01055	14	3.42725	0.967854	14	8.67642	1.00806	14	6.06332	0.971492	14	6.5266	0.940295	14	7.87383	1.10412	14	9.68867	295	33.1712	5.45264
G3V9W6	Aldehyde dehydrogenase OS=Rattus norvegicus OX=10116 GN=Aldh3a2 PE=1 SV=1 - [G3V9W6_RAT]	457.065	12.81	3	4	6	20	0.973031	6	7.70695	0.97456	6	5.5161	1.02787	6	3.85744	1.0342	6	3.882	0.970218	6	8.16824	1.03067	6	7.80671	0.963916	6	8.86199	0.990762	6	5.61419	0.987556	6	9.18122	484	54.0734	7.66455
D4ACC2	KN motif and ankyrin repeat domain-containing protein 2 OS=Rattus norvegicus OX=10116 GN=Kank2 PE=1 SV=2 - [D4ACC2_RAT]	456.299	15.12	5	11	11	16	1.05775	15	7.28229	1.0253	15	11.0506	0.967242	15	6.54395	0.974458	15	4.69715	0.984422	15	8.25346	0.977039	15	5.59823	1.04212	15	13.5314	1.00002	15	7.00842	1.04687	15	14.3439	840	90.1665	5.46533
Q62733	Lamina-associated polypeptide 2, isoform beta OS=Rattus norvegicus OX=10116 GN=Tmpo PE=1 SV=3 - [LAP2_RAT]	456.173	26.77	1	8	9	14	1.05379	13	7.25075	1.07594	13	4.08521	0.975729	13	5.77724	0.984803	13	2.22545	1.01686	13	6.577	0.970131	13	3.49418	0.982335	13	8.22209	0.971076	13	3.71531	1.04829	13	6.32874	452	50.2471	9.39307
P19945	60S acidic ribosomal protein P0 OS=Rattus norvegicus OX=10116 GN=Rplp0 PE=1 SV=2 - [RLA0_RAT]	455.536	29.02	2	9	10	23	0.936124	22	7.27928	0.945527	22	3.32023	1.0256	22	3.90043	1.05273	22	4.14457	0.995796	22	4.77594	1.05294	22	3.36411	1.0052	22	7.89886	1.019	22	4.9515	0.974427	22	9.23304	317	34.1938	6.25244
P68511	14-3-3 protein eta OS=Rattus norvegicus OX=10116 GN=Ywhah PE=1 SV=2 - [1433F_RAT]	455.275	44.31	5	7	12	28	1.1131	9	8.18734	1.0949	9	11.6244	0.952152	9	3.29464	0.956296	9	4.75219	0.979098	9	11.6567	0.948705	9	3.07684	0.945546	9	9.08711	0.981226	9	5.37833	1.04502	9	8.9963	246	28.194	4.89404
Q6IRK9	Carboxypeptidase Q OS=Rattus norvegicus OX=10116 GN=Cpq PE=1 SV=1 - [CBPQ_RAT]	455.114	21.61	5	9	10	18	1.02181	17	5.69658	1.05951	17	7.52266	0.975978	17	4.06792	1.067	17	3.85095	0.941071	17	10.8389	1.00857	17	6.13874	0.9294	17	9.10679	0.958597	17	10.5409	1.08117	17	15.2994	472	52.0086	6.41748
Q9JLZ1	Glutaredoxin-3 OS=Rattus norvegicus OX=10116 GN=Glrx3 PE=1 SV=2 - [GLRX3_RAT]	454.383	17.8	2	6	6	12	0.944341	12	4.48412	0.974726	12	8.76874	1.02396	12	1.5251	1.05084	12	2.92239	1.00512	12	7.73486	1.01951	12	5.67852	1.02847	12	6.803	0.998523	12	7.15014	0.956768	12	5.06374	337	37.8254	5.71924
B2GUZ3	Formyltetrahydrofolate synthetase OS=Rattus norvegicus OX=10116 GN=Mthfd1l PE=1 SV=1 - [B2GUZ3_RAT]	451.791	16.38	3	12	16	20	0.890998	15	7.02424	0.898841	15	3.8792	1.06312	15	2.87719	1.06819	15	4.20704	1.00975	15	5.87015	1.09065	15	3.34943	0.984934	15	3.99627	1.01604	15	4.00918	0.862613	15	4.13717	977	105.776	7.50342
A0A0G2K2V2	AP complex subunit beta OS=Rattus norvegicus OX=10116 GN=Ap1b1 PE=1 SV=1 - [A0A0G2K2V2_RAT]	451.423	17.52	8	5	20	30	1.01205	5	1.85004	1.05401	5	5.56101	0.96877	5	1.89743	0.999592	5	3.25459	1.00647	5	1.85667	0.999326	5	3.11481	1.01245	5	1.59387	0.99629	5	2.60768	1.03125	5	6.68201	942	103.758	5.17334
A0A0G2K757	Dolichyl-diphosphooligosaccharide--protein glycosyltransferase subunit 2 OS=Rattus norvegicus OX=10116 GN=Rpn2 PE=1 SV=1 - [A0A0G2K757_RAT]	451.347	18.89	3	8	10	16	0.974544	14	12.2524	0.97108	14	8.232	1.01328	14	6.19799	1.02515	14	6.18677	1.00476	14	7.63387	1.03075	14	3.74199	0.993911	14	12.6377	0.990995	14	7.14411	0.966386	14	6.94721	630	69.08	5.87158
Q64428	Trifunctional enzyme subunit alpha, mitochondrial OS=Rattus norvegicus OX=10116 GN=Hadha PE=1 SV=2 - [ECHA_RAT]	450.955	26.87	11	18	20	28	0.962591	26	6.85403	0.952894	26	8.20759	0.999981	26	4.35313	1.03425	26	4.28155	1.00079	26	10.149	1.0414	26	9.57362	1.00177	26	10.8094	1.02167	26	6.37793	0.952037	26	14.6589	763	82.6125	9.05615
Q63555	SP120 OS=Rattus norvegicus OX=10116 PE=2 SV=1 - [Q63555_RAT]	448.315	26.07	8	27	29	54	1.12832	51	6.61023	1.12293	51	8.31258	0.959295	51	4.87266	0.982545	51	4.37433	0.943578	51	6.92659	0.971682	51	5.15353	0.920873	51	6.54334	0.929738	51	5.67015	1.11224	51	11.7372	798	87.6936	6.23975
Q5U302	Catenin (Cadherin associated protein), alpha 1 OS=Rattus norvegicus OX=10116 GN=Ctnna1 PE=1 SV=1 - [Q5U302_RAT]	448.175	11.56	3	10	10	16	1.14342	15	11.661	1.14952	15	15.764	0.925765	15	1.42314	0.93801	15	6.62024	0.961203	15	9.33765	0.919138	15	4.14543	0.957223	15	9.23023	0.950997	15	11.028	1.11437	15	10.6892	908	100.174	6.22705
Q7M079	Calcium-binding protein 4 (Fragment) OS=Rattus norvegicus OX=10116 PE=1 SV=1 - [Q7M079_RAT]	447.955	88.89	1	1	1	7	1.13241	7	3.97916	1.12327	7	4.2807	0.976992	7	2.32089	0.982735	7	2.19687	0.92924	7	4.31769	1.00658	7	3.5444	0.929982	7	3.48587	0.930422	7	5.87357	1.09034	7	1.57239	18	1.97688	4.00537
Q62636	Ras-related protein Rap-1b OS=Rattus norvegicus OX=10116 GN=Rap1b PE=1 SV=2 - [RAP1B_RAT]	445.44	37.5	11	3	7	17	1.03324	9	4.23145	1.05005	9	4.06642	1.01561	9	3.74096	0.994448	9	5.52842	0.935343	9	4.86731	1.03442	9	5.52926	0.9231	9	3.0186	0.897682	9	1.45563	1.0692	9	3.83897	184	20.7846	5.78271
A0A0G2K2P5	Tight junction protein ZO-1 OS=Rattus norvegicus OX=10116 GN=Tjp1 PE=1 SV=1 - [ZO1_RAT]	444.966	7.37	12	10	11	16	1.03544	13	7.19169	1.03659	13	7.70097	0.934562	13	5.16293	0.988018	13	4.62571	0.991849	13	3.18442	1.01659	13	3.51023	1.00346	13	5.28296	0.97235	13	6.91205	1.11241	13	7.13413	1765	197.028	6.59521
D3ZM57	Golgi integral membrane protein 4 OS=Rattus norvegicus OX=10116 GN=Golim4 PE=1 SV=3 - [D3ZM57_RAT]	441.793	25.4	3	14	14	18	1.11507	18	8.71494	1.14677	18	5.07413	0.928698	18	4.4493	0.965183	18	3.66868	0.940706	18	3.70115	0.963666	18	4.50895	0.953791	18	8.19059	0.948329	18	5.21729	1.15072	18	7.56898	681	79.7383	4.89404
A0A0A0MXW3	Histone H2A OS=Rattus norvegicus OX=10116 GN=H2afz PE=3 SV=1 - [A0A0A0MXW3_RAT]	439.932	44.09	9	4	7	23	1.13077	8	3.53115	1.11057	8	7.12307	0.951186	8	2.53154	1.00988	8	3.44502	0.95674	8	4.76798	0.95923	8	3.09785	0.939345	8	9.61066	0.963162	8	7.67821	1.14367	8	6.15702	127	13.4135	10.5796
A0A0G2JSS9	Atlastin-3 OS=Rattus norvegicus OX=10116 GN=Atl3 PE=1 SV=1 - [A0A0G2JSS9_RAT]	439.337	14.93	2	7	7	15	0.943726	15	4.77406	0.950023	15	10.8878	0.989247	15	6.16582	0.994992	15	7.69023	1.01307	15	5.82074	1.02213	15	5.78752	1.05439	15	6.37488	1.0646	15	6.33293	0.958971	15	8.5128	536	60.2112	5.5542
F1LP82	Ras-related protein Rab-2A OS=Rattus norvegicus OX=10116 GN=Rab2a PE=1 SV=3 - [F1LP82_RAT]	438.046	43.2	4	8	8	12	0.976593	12	5.53568	0.99052	12	6.81931	1.0103	12	6.22166	1.00166	12	2.74232	1.02262	12	6.50755	1.03257	12	7.65802	1.00668	12	4.36852	0.991625	12	5.25306	0.981408	12	7.07692	206	22.7904	6.53662
Q4AEF8	Coatomer subunit gamma-1 OS=Rattus norvegicus OX=10116 GN=Copg1 PE=2 SV=1 - [COPG1_RAT]	437.98	19.45	2	11	13	16	1.08615	14	8.34749	1.09819	14	5.23593	0.958597	14	4.51874	0.989765	14	2.67977	0.95306	14	7.01733	0.986039	14	3.8755	0.968039	14	7.97422	0.953325	14	3.83512	1.11949	14	11.9989	874	97.5515	5.38916
O35821	Myb-binding protein 1A OS=Rattus norvegicus OX=10116 GN=Mybbp1a PE=1 SV=2 - [MBB1A_RAT]	437.193	10.94	4	14	14	23	0.900786	23	6.79043	0.877202	23	9.30963	1.0474	23	5.39045	1.04011	23	3.22099	1.01286	23	5.08621	1.04225	23	8.33698	1.03214	23	3.50448	1.02933	23	8.70521	0.906338	23	9.9475	1344	152.191	8.95361
A0A0G2KAM4	Fascin OS=Rattus norvegicus OX=10116 GN=Fscn1 PE=1 SV=1 - [A0A0G2KAM4_RAT]	435.144	24.39	5	2	12	22	1.17619	2	2.8188	1.13095	2	12.3694	0.965176	2	10.6379	0.962699	2	6.15848	1.01547	2	13.8005	0.894636	2	14.6593	0.967005	2	15.9398	0.940838	2	8.03443	1.06416	2	13.317	492	53.8476	7.40088
P61589	Transforming protein RhoA OS=Rattus norvegicus OX=10116 GN=Rhoa PE=1 SV=1 - [RHOA_RAT]	434.911	50.26	18	5	12	32	0.938377	14	12.9593	0.941329	14	11.0361	1.03634	14	6.95341	0.997146	14	7.00732	1.0307	14	5.8195	0.98312	14	6.18697	1.0291	14	13.0973	1.05273	14	4.66608	0.948222	14	8.18144	193	21.7681	6.1001
P24268	Cathepsin D OS=Rattus norvegicus OX=10116 GN=Ctsd PE=1 SV=1 - [CATD_RAT]	433.971	21.87	3	9	9	23	1.08463	23	3.58891	1.04184	23	9.22867	0.989745	23	4.00912	0.998499	23	2.58558	0.97644	23	7.81476	0.98378	23	3.51828	0.988556	23	8.39893	0.98573	23	5.97166	1.06327	23	9.0981	407	44.6519	7.09326
Q5RKJ9	RAB10, member RAS oncogene family OS=Rattus norvegicus OX=10116 GN=Rab10 PE=1 SV=1 - [Q5RKJ9_RAT]	433.752	43	15	7	9	17	0.888733	10	7.12728	0.938762	10	4.91882	1.02826	10	5.03713	1.03637	10	4.38252	1.03684	10	9.41894	1.03772	10	4.15057	1.02528	10	6.89957	1.02171	10	5.90973	0.946715	10	1.88165	200	22.5266	8.38232
P35435	ATP synthase subunit gamma, mitochondrial OS=Rattus norvegicus OX=10116 GN=Atp5f1c PE=1 SV=2 - [ATPG_RAT]	433.585	41.03	3	11	12	26	0.95954	24	5.8593	0.977627	24	7.74514	0.990109	24	5.68273	1.00851	24	4.42461	1.0129	24	3.7236	1.04992	24	5.92169	1.01662	24	6.67857	1.00321	24	4.40976	0.974975	24	6.94842	273	30.1717	8.83643
A0A0G2K7Q7	Insulin-degrading enzyme OS=Rattus norvegicus OX=10116 GN=Ide PE=1 SV=1 - [A0A0G2K7Q7_RAT]	432.37	14.83	4	15	15	21	1.01666	20	5.25468	1.03641	20	6.43262	0.974836	20	3.87013	1.01915	20	2.06579	0.950372	20	8.09985	1.02224	20	4.55388	0.960429	20	6.64194	0.989941	20	7.05597	1.04571	20	10.9855	978	113.09	6.34131
P14408	Fumarate hydratase, mitochondrial OS=Rattus norvegicus OX=10116 GN=Fh PE=1 SV=2 - [FUMH_RAT]	431.397	18.54	5	9	9	17	1.04249	17	5.04402	1.00952	17	10.0776	0.97242	17	5.33842	1.00073	17	3.3641	0.974657	17	6.84588	1.01006	17	5.36376	0.964662	17	7.3357	0.972023	17	3.17078	1.04548	17	10.1779	507	54.43	8.73389
O55215	40S ribosomal protein S2 OS=Rattus norvegicus OX=10116 PE=2 SV=1 - [O55215_RAT]	431.259	42.4	16	11	11	27	0.965097	27	4.91512	1.02122	27	10.0389	0.987646	27	4.46174	1.03471	27	3.68929	1.00166	27	4.7966	1.0355	27	5.09103	0.954787	27	10.5495	0.967413	27	6.51155	1.02769	27	7.73984	250	27.2135	9.62744
F1LPV0	Asparagine--tRNA ligase OS=Rattus norvegicus OX=10116 GN=Nars PE=1 SV=2 - [F1LPV0_RAT]	430.52	19.71	6	12	12	20	0.785835	20	9.99455	0.793271	20	6.74268	1.09085	20	3.25167	1.11805	20	2.46309	1.0695	20	5.16034	1.13736	20	6.87325	1.04155	20	4.66576	1.06047	20	3.5731	0.776065	20	5.4583	558	64.0869	5.85889
Q5PQK5	Radixin OS=Rattus norvegicus OX=10116 GN=Rdx PE=2 SV=1 - [Q5PQK5_RAT]	430.183	27.44	27	9	23	47	1.05682	12	10.1294	1.12004	12	9.77932	0.969157	12	2.90504	0.997063	12	5.20862	0.948712	12	6.09961	1.01049	12	5.25539	0.962196	12	10.3716	0.963075	12	7.42204	1.06874	12	17.1752	583	68.5013	6.26514
P0DP29	Calmodulin-1 OS=Rattus norvegicus OX=10116 GN=Calm1 PE=1 SV=1 - [CALM1_RAT]	429.638	34.23	4	8	8	30	1.09118	30	8.25067	1.09871	30	9.28037	0.956084	30	5.80238	0.975532	30	5.87889	0.955621	30	7.83985	0.964682	30	5.12635	0.966	30	10.8594	0.985216	30	12.314	1.09999	30	6.93922	149	16.8268	4.22119
A0A0G2K0F5	Myosin heavy chain 2 OS=Rattus norvegicus OX=10116 GN=Myh1 PE=1 SV=1 - [A0A0G2K0F5_RAT]	429.57	8.4	40	2	19	21	1.06204	2	1.11921	1.01785	2	9.57905	1.00106	2	11.7949	0.927458	2	0.190518	1.11728	2	7.56934	0.847547	2	7.1595	1.06842	2	4.70543	1.05328	2	1.78006	0.991674	2	18.499	1940	223.009	5.78271
Q66H61	Glutamine--tRNA ligase OS=Rattus norvegicus OX=10116 GN=Qars1 PE=1 SV=1 - [SYQ_RAT]	429.154	19.1	6	12	12	18	0.974987	17	4.54827	0.965086	17	9.99088	1.01688	17	5.16292	1.03922	17	4.47284	1.00458	17	9.24837	1.02443	17	6.57533	1.00487	17	15.2352	1.00142	17	8.78003	0.997874	17	13.8716	775	87.6448	7.31299
B6DTP5	DEAD box protein 5 (Fragment) OS=Rattus norvegicus OX=10116 GN=Ddx5 PE=2 SV=1 - [B6DTP5_RAT]	428.914	24.27	4	11	16	22	1.12092	14	10.3417	1.13666	14	10.2882	0.972564	14	4.27311	0.967075	14	4.41537	0.967666	14	8.59317	0.954332	14	4.58553	0.97334	14	7.79073	0.95864	14	6.23822	1.07071	14	7.73217	614	69.0687	8.85107
A0A0G2K943	AP-2 complex subunit alpha OS=Rattus norvegicus OX=10116 GN=Ap2a2 PE=1 SV=1 - [A0A0G2K943_RAT]	428.001	14.32	3	8	13	19	1.05272	12	11.3358	1.01818	12	8.68855	1.02236	12	7.09676	1.00587	12	3.01603	0.984508	12	6.73925	0.992178	12	4.37429	0.970223	12	8.61125	0.951641	12	6.7924	1.02104	12	6.77806	915	101.521	7.07861
Q920J4	Thioredoxin-like protein 1 OS=Rattus norvegicus OX=10116 GN=Txnl1 PE=1 SV=3 - [TXNL1_RAT]	426.23	33.91	2	7	7	12	1.07194	12	5.77641	1.07905	12	7.93776	0.997491	12	3.92642	1.03224	12	3.33855	0.978533	12	4.16901	1.0101	12	4.14748	0.982893	12	5.37828	0.965811	12	4.56014	1.03462	12	5.68238	289	32.2288	4.95752
E9PU28	Inosine-5'-monophosphate dehydrogenase 2 OS=Rattus norvegicus OX=10116 GN=Impdh2 PE=1 SV=1 - [IMDH2_RAT]	425.941	21.79	4	9	9	17	0.896929	17	6.7135	0.907801	17	3.42682	1.02713	17	3.38055	1.03766	17	5.6036	1.0229	17	5.63941	1.04683	17	7.92251	0.999344	17	7.39352	1.04419	17	5.63923	0.946894	17	6.93816	514	55.7798	7.28369
P63326	40S ribosomal protein S10 OS=Rattus norvegicus OX=10116 GN=Rps10 PE=2 SV=1 - [RS10_RAT]	425.81	52.12	10	10	11	28	0.956999	26	6.97784	0.975878	26	7.34517	1.00515	26	3.71219	1.02372	26	4.99662	1.01799	26	6.42576	1.03195	26	5.0642	1.00432	26	5.05858	1.00616	26	5.44695	0.966006	26	7.98273	165	18.9038	10.1548
F1LN59	Eukaryotic translation initiation factor 4, gamma 2 OS=Rattus norvegicus OX=10116 GN=Eif4g2 PE=1 SV=2 - [F1LN59_RAT]	424.027	19.21	18	15	16	20	0.935884	17	7.59556	0.945951	17	7.96787	1.01627	17	3.8614	1.02964	17	3.42264	1.02438	17	5.31723	1.03282	17	5.56164	1.01073	17	5.53483	1.00754	17	7.55005	0.948677	17	9.84891	906	102.05	7.13721
Q68FU3	Electron transfer flavoprotein subunit beta OS=Rattus norvegicus OX=10116 GN=Etfb PE=1 SV=3 - [ETFB_RAT]	423.109	36.86	1	7	7	13	0.95071	13	5.83743	0.934815	13	5.10545	1.01935	13	4.80493	1.03618	13	6.01321	1.00587	13	3.64785	1.04032	13	2.48297	1.02371	13	6.81777	1.01727	13	2.18	0.943777	13	3.78996	255	27.6701	7.75244
Q6URK4	Heterogeneous nuclear ribonucleoprotein A3 OS=Rattus norvegicus OX=10116 GN=Hnrnpa3 PE=1 SV=1 - [ROA3_RAT]	422.352	28.5	8	11	16	41	1.02184	23	7.29303	1.04259	23	9.8218	0.985457	23	6.10946	0.994948	23	5.24248	0.969828	23	7.13149	0.992855	23	5.2508	0.97982	23	6.93977	0.989457	23	10.1297	1.03233	23	13.7351	379	39.6276	9.01221
B2RYP0	Ras homolog family member C OS=Rattus norvegicus OX=10116 GN=Rhoc PE=1 SV=1 - [B2RYP0_RAT]	422.204	44.04	8	4	10	21	1.0788	3	6.07091	1.06209	3	10.3294	1.01008	3	5.9272	1.10895	3	9.8353	0.988788	3	12.8951	1.07013	3	6.87529	0.856873	3	0.60654	0.973228	3	7.47331	0.85978	3	25.174	193	22.0223	6.58057
Q5U362	Annexin OS=Rattus norvegicus OX=10116 GN=Anxa4 PE=1 SV=1 - [Q5U362_RAT]	420.56	35.11	5	11	13	27	1.03944	23	6.62986	1.01285	23	10.5959	0.98438	23	3.42113	1.00123	23	3.95209	0.967163	23	6.87656	0.99366	23	5.46403	0.962259	23	8.19929	1.00492	23	7.6312	1.05801	23	6.59155	319	35.8711	5.56689
F1LMZ8	26S proteasome non-ATPase regulatory subunit 11 OS=Rattus norvegicus OX=10116 GN=Psmd11 PE=1 SV=2 - [PSD11_RAT]	420.221	15.17	4	7	7	13	1.00059	13	4.93116	1.001	13	8.72	0.987091	13	5.60681	0.997493	13	3.95739	1.01537	13	10.8452	1.01412	13	6.50091	0.973135	13	3.54439	0.954936	13	8.06154	1.03871	13	10.6955	422	47.434	6.48096
G3V7G9	Eukaryotic translation initiation factor 3, subunit 6 interacting protein OS=Rattus norvegicus OX=10116 GN=Eif3l PE=1 SV=2 - [G3V7G9_RAT]	420.122	26.44	1	9	9	16	0.96323	16	4.87188	0.991991	16	1.69651	0.999235	16	3.37495	1.01341	16	3.0884	1.0003	16	3.83408	1.04289	16	3.22844	0.99577	16	3.87314	0.987773	16	9.44754	0.980859	16	7.73985	382	45.053	9.02686
P15791	Calcium/calmodulin-dependent protein kinase type II subunit delta OS=Rattus norvegicus OX=10116 GN=Camk2d PE=1 SV=1 - [KCC2D_RAT]	419.967	17.26	17	7	9	18	0.864191	15	6.16442	0.864955	15	5.00097	1.03505	15	2.75456	1.10143	15	3.76247	1.02253	15	7.01876	1.09682	15	4.89267	1.0087	15	3.98544	1.01584	15	3.6523	0.862625	15	6.94651	533	60.0426	7.26904
Q4KM71	Splicing factor proline/glutamine rich (Polypyrimidine tract binding protein associated) OS=Rattus norvegicus OX=10116 GN=Sfpq PE=2 SV=1 - [Q4KM71_RAT]	419.576	28.61	5	13	17	33	1.07274	26	11.0319	1.1067	26	6.71089	0.939614	26	6.5766	0.96639	26	5.0823	0.997253	26	8.93009	0.953279	26	6.82099	0.954263	26	12.6158	0.993834	26	13.7407	1.10503	26	20.1504	699	75.4393	9.43701
Q641Y0	Dolichyl-diphosphooligosaccharide--protein glycosyltransferase 48 kDa subunit OS=Rattus norvegicus OX=10116 GN=Ddost PE=2 SV=1 - [OST48_RAT]	419.431	16.78	1	7	7	12	1.01105	12	6.02296	1.00087	12	7.38241	0.990431	12	4.71765	1.00051	12	4.50433	0.987623	12	7.47111	1.02035	12	3.05008	0.993775	12	6.84013	0.973895	12	7.31771	1.0274	12	6.33472	441	48.865	5.97314
P13084	Nucleophosmin OS=Rattus norvegicus OX=10116 GN=Npm1 PE=1 SV=1 - [NPM_RAT]	419.256	40.75	8	15	15	30	0.911323	30	10.246	0.892945	30	10.8989	1.03065	30	2.73512	1.02096	30	5.68538	1.0281	30	5.39178	1.02471	30	5.91226	1.05077	30	5.14828	1.04201	30	6.74948	0.931388	30	8.53502	292	32.5398	4.76709
G3V818	Alpha-parvin OS=Rattus norvegicus OX=10116 GN=Parva PE=1 SV=1 - [G3V818_RAT]	419.137	20.7	3	6	7	16	1.1313	15	2.16613	1.12679	15	13.8864	0.950445	15	5.37411	0.980492	15	3.40457	0.938443	15	3.01123	0.983662	15	4.96423	0.93981	15	9.12163	0.938639	15	7.50791	1.15431	15	10.282	372	42.2954	5.94775
D4A0L4	Y-box-binding protein 3 OS=Rattus norvegicus OX=10116 GN=Ybx3 PE=1 SV=3 - [D4A0L4_RAT]	418.73	25.09	8	3	5	11	0.982792	5	6.91205	0.96345	5	9.31835	1.00522	5	0.823257	0.932566	5	3.0531	1.06929	5	5.62924	0.984202	5	5.68044	1.04908	5	12.5128	1.08783	5	2.3879	0.905621	5	8.52804	291	31.2691	10.4038
A0A0G2K5E7	ATP-citrate synthase OS=Rattus norvegicus OX=10116 GN=Acly PE=1 SV=1 - [A0A0G2K5E7_RAT]	417.094	16.82	13	12	16	23	1.12271	16	4.80588	1.05515	16	6.3478	0.976775	16	7.48425	0.958307	16	4.24235	0.986095	16	10.6648	0.978895	16	9.83827	0.996142	16	11.6	0.980279	16	8.20306	1.07318	16	14.8827	1100	120.466	7.34229
Q45QL6	Guanine nucleotide binding protein beta 2 (Fragment) OS=Rattus norvegicus OX=10116 GN=Gnb2 PE=2 SV=1 - [Q45QL6_RAT]	416.342	17.87	10	4	6	11	1.08565	7	5.79729	1.0228	7	11.1825	1.02004	7	5.24258	1.06143	7	8.08575	0.943398	7	10.9969	1.01828	7	6.76719	0.923471	7	15.1846	0.927393	7	14.2737	1.0265	7	9.22559	319	34.981	6.34131
A0A0G2JUL7	Septin 6 (Predicted), isoform CRA_b OS=Rattus norvegicus OX=10116 GN=Sept11 PE=1 SV=1 - [A0A0G2JUL7_RAT]	416.044	29.6	12	8	15	23	1.06536	13	6.18222	1.11167	13	7.92069	0.968138	13	3.40272	0.961571	13	3.16118	0.977749	13	6.28542	0.96829	13	3.69951	1.00002	13	5.39748	0.951003	13	7.68497	1.1211	13	10.4738	429	49.3102	6.81494
P31232	Transgelin OS=Rattus norvegicus OX=10116 GN=Tagln PE=1 SV=2 - [TAGL_RAT]	414.783	46.27	2	10	10	25	0.974012	24	5.4124	0.985819	24	5.08907	0.981079	24	6.66973	0.984399	24	2.63577	1.05532	24	6.46176	0.973583	24	4.87125	1.01788	24	4.93289	1.04215	24	4.80588	0.987823	24	8.96908	201	22.5883	8.83643
Q920L2	Succinate dehydrogenase [ubiquinone] flavoprotein subunit, mitochondrial OS=Rattus norvegicus OX=10116 GN=Sdha PE=1 SV=1 - [SDHA_RAT]	414.192	22.41	6	13	14	24	0.943848	22	5.13523	0.967211	22	5.89822	1.00957	22	5.47784	1.02449	22	4.60943	1.00226	22	11.2802	1.03837	22	6.7464	1.00439	22	10.1027	1.01546	22	7.41265	0.977204	22	9.58737	656	71.5697	7.1665
F1LS72	SUMO-activating enzyme subunit 2 OS=Rattus norvegicus OX=10116 GN=Uba2 PE=1 SV=3 - [F1LS72_RAT]	412.574	18.32	4	11	12	17	0.994833	16	6.13236	1.02042	16	4.8135	0.993306	16	5.40233	1.02686	16	2.47534	0.983308	16	4.82771	1.03856	16	2.18889	0.955171	16	6.91252	1.00053	16	5.25896	1.03318	16	11.3426	595	66.2975	5.16064
P62243	40S ribosomal protein S8 OS=Rattus norvegicus OX=10116 GN=Rps8 PE=1 SV=2 - [RS8_RAT]	412.285	43.75	6	10	10	20	0.996182	20	10.3394	1.0275	20	6.90909	1.00313	20	4.73497	1.04302	20	4.49395	0.973779	20	8.0367	1.01483	20	8.2802	0.974973	20	7.64674	0.974977	20	5.60586	1.00005	20	9.21169	208	24.1902	10.3159
A0A140TAA4	Programmed cell death 6-interacting protein OS=Rattus norvegicus OX=10116 GN=Pdcd6ip PE=1 SV=1 - [A0A140TAA4_RAT]	412.156	21.89	7	18	18	26	0.93124	25	6.50418	0.956744	25	6.63147	1.03648	25	5.22802	1.0371	25	3.79586	1.01513	25	7.17614	1.05061	25	3.7302	0.99572	25	8.22117	1.00069	25	5.47853	0.94423	25	7.70464	868	95.8222	6.52197
D3ZD23	ATP-binding cassette subfamily E member 1 OS=Rattus norvegicus OX=10116 GN=Abce1 PE=1 SV=1 - [D3ZD23_RAT]	412.021	27.05	11	14	17	25	0.939908	21	5.00718	0.970254	21	6.37687	1.01414	21	3.69875	1.02534	21	5.00614	1.01584	21	4.9989	1.04209	21	5.73639	1.00224	21	6.76966	0.996824	21	7.95875	0.998292	21	6.79919	599	67.257	8.33838
P04961	Proliferating cell nuclear antigen OS=Rattus norvegicus OX=10116 GN=Pcna PE=1 SV=1 - [PCNA_RAT]	411.883	31.42	3	10	10	18	1.256	18	17.8149	1.24512	18	16.4473	0.916264	18	7.15	0.908366	18	3.99271	0.908869	18	16.9712	0.865882	18	3.34754	0.932294	18	20.0993	0.943481	18	11.6485	1.24112	18	19.3012	261	28.7303	4.69092
P00787	Cathepsin B OS=Rattus norvegicus OX=10116 GN=Ctsb PE=1 SV=2 - [CATB_RAT]	411.86	24.78	2	8	8	19	1.05459	19	12.868	1.08629	19	12.2766	0.942239	19	5.33872	0.988041	19	3.90369	0.971623	19	11.5569	1.01346	19	5.43345	0.967494	19	9.89853	0.980945	19	10.9461	1.12437	19	7.65865	339	37.4456	5.60498
P32551	Cytochrome b-c1 complex subunit 2, mitochondrial OS=Rattus norvegicus OX=10116 GN=Uqcrc2 PE=1 SV=2 - [QCR2_RAT]	410.178	27.65	1	12	12	17	0.911917	17	4.70199	0.891185	17	8.45073	1.03106	17	5.52648	1.06544	17	4.04869	1.00556	17	7.91369	1.04313	17	6.54744	1.00244	17	11.2888	1.02467	17	5.9171	0.923483	17	12.0079	452	48.3662	9.14404
P18420	Proteasome subunit alpha type-1 OS=Rattus norvegicus OX=10116 GN=Psma1 PE=1 SV=2 - [PSA1_RAT]	409.141	42.97	1	11	11	19	0.979958	19	8.90012	0.997867	19	5.0333	1.01338	19	4.03715	1.00777	19	8.11993	1.04493	19	9.27085	0.980823	19	7.31987	1.02695	19	9.99068	1.01332	19	5.81453	0.931786	19	10.7402	263	29.4988	6.60986
Q66H98	Caveolae-associated protein 2 OS=Rattus norvegicus OX=10116 GN=Cavin2 PE=1 SV=3 - [CAVN2_RAT]	407.188	35.49	4	17	17	33	1.44904	33	22.4141	1.50669	33	16.0727	0.842496	33	11.4481	0.827151	33	12.3171	0.871973	33	15.3715	0.792902	33	16.9842	0.883706	32	14.464	0.834313	32	13.1655	1.42697	33	21.9831	417	46.3583	5.2876
Q6P6V0	Glucose-6-phosphate isomerase OS=Rattus norvegicus OX=10116 GN=Gpi PE=1 SV=1 - [G6PI_RAT]	407.154	26.34	1	16	18	27	0.957648	23	5.12124	0.911495	23	5.40341	1.02061	23	3.9588	1.02633	23	5.10747	1.01908	23	6.29749	1.00601	23	5.19597	1.03299	23	7.09408	1.015	23	8.16074	0.934009	23	9.78594	558	62.7871	7.76709
M0RD75	40S ribosomal protein S6 OS=Rattus norvegicus OX=10116 GN=Rps6 PE=1 SV=1 - [M0RD75_RAT]	406.711	41.7	38	16	17	39	0.994106	33	10.9855	1.02447	33	8.08057	1.03849	33	4.13658	1.03563	33	3.69274	0.986328	33	7.00349	1.02133	33	5.71352	0.975398	33	9.6162	0.976919	33	8.92318	0.991816	33	9.94736	247	28.4039	10.8433
O88767	Parkinson disease protein 7 homolog OS=Rattus norvegicus OX=10116 GN=Park7 PE=1 SV=1 - [PARK7_RAT]	405.28	30.16	2	7	7	19	1.01613	19	7.31416	1.05884	19	4.10712	0.983271	19	3.27555	1.01329	19	6.28712	0.983659	19	3.97238	1.00825	19	5.98097	0.964143	19	5.4549	0.960698	19	5.63007	1.01836	19	8.64556	189	19.9614	6.771
Q5FVM4	Non-POU domain-containing octamer-binding protein OS=Rattus norvegicus OX=10116 GN=Nono PE=1 SV=3 - [NONO_RAT]	400.488	37.18	9	14	21	32	1.13302	22	5.81808	1.13239	22	7.8171	0.944369	22	4.89403	0.947368	22	3.1052	0.978756	22	9.75667	0.959349	22	5.80639	0.988599	22	10.0647	0.991032	22	7.55005	1.07535	22	10.7785	476	54.8906	8.95361
A0A0G2K0B4	E3 ubiquitin-protein ligase OS=Rattus norvegicus OX=10116 GN=Nedd4 PE=1 SV=1 - [A0A0G2K0B4_RAT]	398.084	15.24	6	11	11	17	1.08269	17	7.95765	1.1261	17	10.6143	0.975082	17	5.99585	0.971792	17	1.08936	0.968697	17	8.35709	0.966459	17	5.63475	0.996987	17	5.49562	0.978816	17	5.81207	1.07407	17	12.2415	886	102.371	5.26221
P04550	Parathymosin OS=Rattus norvegicus OX=10116 GN=Ptms PE=1 SV=2 - [PTMS_RAT]	397.621	29.41	1	5	5	14	1.21933	14	9.84684	1.18342	14	7.28206	0.96763	14	6.55004	0.999315	14	4.0172	0.891488	14	4.59421	0.967258	14	4.92451	0.90732	14	6.4938	0.903621	14	7.99578	1.16918	14	8.24294	102	11.5522	4.1958
A0A140TAH5	AP-2 complex subunit mu OS=Rattus norvegicus OX=10116 GN=Ap2m1 PE=1 SV=1 - [A0A140TAH5_RAT]	396.041	24.42	5	9	10	15	1.05459	13	10.0342	1.06901	13	11.4073	0.962785	13	4.82315	0.997076	13	4.04862	0.978723	13	4.28609	0.982974	13	3.21355	0.986086	13	10.8815	0.935799	13	4.77488	1.08958	13	8.87708	434	49.495	9.53955
A0A0H2UH99	60S ribosomal protein L24 OS=Rattus norvegicus OX=10116 GN=Rpl24 PE=1 SV=1 - [A0A0H2UH99_RAT]	393.968	42.31	14	9	9	18	1.01072	18	8.96921	0.992989	18	10.423	0.999619	18	4.29332	0.995205	18	4.00548	1.00802	18	10.441	1.01307	18	5.31231	1.01258	18	15.5978	0.99045	18	12.2453	0.994663	18	12.3374	156	17.6649	11.356
Q60587	Trifunctional enzyme subunit beta, mitochondrial OS=Rattus norvegicus OX=10116 GN=Hadhb PE=1 SV=1 - [ECHB_RAT]	393.081	19.37	5	9	10	18	0.962604	17	4.24645	0.977483	17	6.10308	1.03963	17	3.80809	1.05019	17	4.48018	0.980843	17	4.95551	1.05954	17	3.86759	0.983719	17	6.90438	0.996307	17	5.58433	0.958742	17	6.97621	475	51.3815	9.46631
P18422	Proteasome subunit alpha type-3 OS=Rattus norvegicus OX=10116 GN=Psma3 PE=1 SV=3 - [PSA3_RAT]	391.962	41.57	14	11	14	22	0.943444	19	8.62001	0.993486	19	11.3027	1.0411	19	6.39479	1.0061	19	3.45433	0.98462	19	9.2466	1.01385	19	5.10875	0.999386	19	7.36322	1.00383	19	6.95917	0.963801	19	9.46549	255	28.4011	5.43994
F1LSS1	Structural maintenance of chromosomes protein OS=Rattus norvegicus OX=10116 GN=Smc1a PE=1 SV=3 - [F1LSS1_RAT]	388.977	13.88	17	16	19	23	1.15029	18	5.92247	1.14198	18	7.29941	0.932231	18	7.8608	0.95297	18	3.00707	0.941983	18	8.43503	0.951631	18	5.02405	0.927972	18	3.05759	0.9721	18	6.21068	1.15711	18	9.93503	1232	142.859	7.15186
Q6NYB7	Ras-related protein Rab-1A OS=Rattus norvegicus OX=10116 GN=Rab1A PE=1 SV=3 - [RAB1A_RAT]	388.455	38.54	17	3	9	15	1.02811	4	8.21211	0.982819	4	9.90306	1.04831	4	5.8252	0.970618	4	4.45716	0.995628	4	7.56079	0.995851	4	4.76025	1.00655	4	6.93305	0.989122	4	2.89434	1.00176	4	9.85406	205	22.6634	6.21436
A0A0G2K6U1	Vesicle-fusing ATPase OS=Rattus norvegicus OX=10116 GN=Nsf PE=1 SV=1 - [A0A0G2K6U1_RAT]	388.157	14.11	15	8	10	15	0.999569	12	4.46857	1.02231	12	4.81143	0.988763	12	4.55371	0.995767	12	5.60986	1.00524	12	4.65864	1.00881	12	5.21528	1.00235	12	3.99154	1.0074	12	2.38787	0.996191	12	10.198	744	82.591	6.94678
Q5RJK5	Chromobox 3 OS=Rattus norvegicus OX=10116 GN=Cbx3 PE=1 SV=1 - [Q5RJK5_RAT]	387.071	33.88	7	9	9	20	1.22879	20	5.38748	1.24295	20	8.67372	0.916348	20	4.25779	0.949303	20	2.4134	0.911346	20	5.63729	0.940292	20	4.13282	0.89201	20	5.19956	0.896308	20	7.2873	1.22949	20	4.61218	183	20.7984	5.32568
Q9JKB7	Guanine deaminase OS=Rattus norvegicus OX=10116 GN=Gda PE=1 SV=1 - [Q9JKB7_RAT]	386.823	16.3	2	7	7	12	0.923487	12	5.2202	0.954807	12	5.22977	1.05151	12	2.87821	1.02592	12	3.72998	0.966833	12	3.81057	1.04804	12	5.61477	0.981292	12	7.25382	1.01619	12	8.40061	0.942395	12	5.38659	454	50.8687	5.71924
P13264	Glutaminase kidney isoform, mitochondrial OS=Rattus norvegicus OX=10116 GN=Gls PE=1 SV=2 - [GLSK_RAT]	386.14	16.17	7	2	8	17	0.926967	11	9.87805	0.85289	11	6.4323	1.01262	11	11.0269	0.953552	11	9.85142	1.0497	11	12.4913	0.932339	11	8.45143	1.04828	11	14.123	1.0447	11	10.1739	0.914811	11	25.4376	674	73.9762	7.86963
A0A0G2K9I8	Protein arginine methyltransferase 1-like OS=Rattus norvegicus OX=10116 GN=LOC100361025 PE=4 SV=1 - [A0A0G2K9I8_RAT]	385.447	22.1	7	10	10	23	0.98154	23	6.3391	1.00574	23	6.28737	0.998298	23	4.24701	1.03049	23	2.3889	0.977897	23	4.64045	1.04951	23	3.94094	0.947747	23	3.85468	0.952523	23	4.94909	1.03667	23	5.7492	353	40.477	5.59229
A0A0G2K0X9	Protein transport protein Sec31A OS=Rattus norvegicus OX=10116 GN=Sec31a PE=1 SV=1 - [A0A0G2K0X9_RAT]	383.859	12.75	5	14	15	21	0.997175	20	6.76811	1.08898	20	8.35533	1.00301	20	6.75429	1.00448	20	2.97508	0.996087	20	7.18177	0.975229	20	10.3472	0.969243	20	7.7611	0.972214	20	7.46346	1.02859	20	11.6721	1216	131.887	6.7124
P06302	Prothymosin alpha OS=Rattus norvegicus OX=10116 GN=Ptma PE=1 SV=2 - [PTMA_RAT]	383.83	23.21	4	6	6	17	1.1913	17	10.5487	1.14923	17	5.35474	1.02481	17	6.55958	1.01874	17	2.82579	0.825869	17	9.71488	1.01387	17	4.7594	0.83452	17	7.60963	0.842578	17	9.23796	1.20056	17	9.8194	112	12.3751	3.84033
P97536	Cullin-associated NEDD8-dissociated protein 1 OS=Rattus norvegicus OX=10116 GN=Cand1 PE=1 SV=1 - [CAND1_RAT]	383.776	13.33	3	14	17	20	1.00552	17	7.80637	1.03406	17	7.74418	1.0035	17	2.81709	1.02376	17	2.74469	1.00766	17	5.73648	1.03946	17	3.68558	1.00473	17	8.01485	0.961323	17	9.27689	0.9796	17	10.6779	1230	136.275	5.78271
B5DEN5	Elongation factor 1-beta OS=Rattus norvegicus OX=10116 GN=Eef1b2 PE=1 SV=1 - [B5DEN5_RAT]	383.19	39.56	2	7	9	17	0.998234	13	5.48606	1.04524	13	5.80719	0.974508	13	1.93845	1.02979	13	4.41108	1.00721	13	4.71325	1.02074	13	2.52264	0.994739	13	5.71138	1.00757	13	3.21104	1.02326	13	7.15092	225	24.6603	4.71631
M0RC65	Cofilin 2 OS=Rattus norvegicus OX=10116 GN=Cfl2 PE=1 SV=1 - [M0RC65_RAT]	383.054	31.33	2	4	7	21	1.15292	7	13.4474	1.0572	7	9.94137	0.984459	7	2.10288	0.982937	7	3.23621	0.987869	7	7.58205	0.984589	7	3.41317	0.92377	7	13.5729	0.932084	7	14.6292	1.07248	7	6.49298	166	18.6978	7.88428
P29534	Vascular cell adhesion protein 1 OS=Rattus norvegicus OX=10116 GN=Vcam1 PE=1 SV=1 - [VCAM1_RAT]	382.217	20.03	4	11	12	16	0.622074	15	14.2454	0.620314	15	7.96216	1.2715	15	6.39377	1.31112	15	4.27764	0.924541	15	4.99003	1.32718	15	5.7418	0.929604	15	6.38243	0.927839	15	7.46142	0.636963	15	6.93794	739	81.1944	5.23682
P41777	Nucleolar and coiled-body phosphoprotein 1 OS=Rattus norvegicus OX=10116 GN=Nolc1 PE=1 SV=2 - [NOLC1_RAT]	381.696	25.85	2	22	22	43	0.874293	43	9.76576	0.870837	43	10.6813	1.05492	43	6.5535	1.06362	43	5.36385	1.08325	43	5.31912	1.03731	43	7.77642	1.05825	43	7.42492	1.04472	43	8.33886	0.910665	43	12.601	704	73.5206	9.53955
B0BMW0	Ras-related protein Rab-14 OS=Rattus norvegicus OX=10116 GN=Rab14 PE=1 SV=1 - [B0BMW0_RAT]	381.563	47.91	14	7	8	13	0.96632	10	13.0715	0.944998	10	3.06725	1.0475	10	5.13706	1.01277	10	3.06954	1.02895	10	7.0866	0.989623	10	4.07436	1.04008	10	10.4139	1.01685	10	6.36034	0.90875	10	18.3353	215	23.8819	6.21436
Q6P6G9	Helix-destabilizing protein OS=Rattus norvegicus OX=10116 GN=Hnrnpa1 PE=1 SV=1 - [Q6P6G9_RAT]	381.015	23.64	8	4	12	35	1.10452	7	4.38565	1.12137	7	11.7349	0.952515	7	4.52151	1.00939	7	6.98154	0.95245	7	3.89502	0.991939	7	3.56848	0.951674	7	5.07136	0.899564	7	6.76779	1.14101	7	8.2463	313	33.599	9.23193
Q5BJU0	RAS-related 2 OS=Rattus norvegicus OX=10116 GN=Rras2 PE=1 SV=1 - [Q5BJU0_RAT]	379.95	22.06	2	3	4	9	0.985912	6	4.00758	0.953393	6	3.44245	1.05067	6	0.628754	1.00656	6	1.30979	1.00774	6	4.85704	0.992496	6	1.62388	1.03393	6	3.70337	1.03102	6	2.21612	0.874399	6	6.78826	204	23.3847	6.01123
A0A0G2K428	Dynactin subunit 1 OS=Rattus norvegicus OX=10116 GN=Dctn1 PE=1 SV=1 - [A0A0G2K428_RAT]	379.169	13.06	18	14	17	22	1.04388	18	5.09451	1.02928	18	9.57325	0.964989	18	3.66632	0.986703	18	3.55647	0.966256	18	6.00245	1.00881	18	2.3037	0.996395	18	4.38152	0.986249	18	4.57735	1.05015	18	7.63587	1263	139.754	5.69385
G3V7J9	All-trans-retinol dehydrogenase [NAD(+)] ADH7 OS=Rattus norvegicus OX=10116 GN=Adh7 PE=1 SV=1 - [G3V7J9_RAT]	378.943	18.18	2	5	6	11	0.900802	9	3.29215	0.872261	9	3.8422	1.05116	9	4.70006	1.1057	9	6.77011	0.957443	9	6.17936	1.11525	9	9.79843	0.945687	9	9.87697	0.946468	9	4.73648	0.964472	9	9.27851	374	40.1373	6.75635
P11232	Thioredoxin OS=Rattus norvegicus OX=10116 GN=Txn PE=1 SV=2 - [THIO_RAT]	378.877	56.19	17	5	6	18	0.993718	17	7.02523	0.982758	17	10.0625	1.00646	17	2.4259	1.01366	17	6.73462	1.06848	17	5.81047	1.02422	17	5.94719	1.00059	17	16.1804	0.971729	17	11.9663	0.978838	17	11.4864	105	11.6657	4.91943
D3ZXP3	Histone H2A OS=Rattus norvegicus OX=10116 GN=H2afx PE=1 SV=1 - [D3ZXP3_RAT]	378.634	35.66	2	3	8	34	1.11665	7	16.9019	1.09633	7	8.2619	1.00064	7	3.24696	0.991097	7	5.83976	0.953252	7	6.66545	0.963887	7	10.5104	0.935976	7	20.5885	0.966024	7	15.7528	1.07046	7	14.9651	143	15.1054	10.7407
P62193	26S proteasome regulatory subunit 4 OS=Rattus norvegicus OX=10116 GN=Psmc1 PE=1 SV=1 - [PRS4_RAT]	377.24	24.09	2	7	10	16	1.04028	12	8.50005	1.0485	12	7.885	0.968293	12	0.873901	1.01029	12	5.60116	0.951621	12	7.51958	1.01728	12	3.46775	0.907335	12	3.61182	0.992004	12	5.17435	1.07736	12	8.9654	440	49.1537	6.21436
Q8VHK7	Hepatoma-derived growth factor OS=Rattus norvegicus OX=10116 GN=Hdgf PE=1 SV=2 - [HDGF_RAT]	376.721	59.07	3	10	10	17	1.0711	17	7.76637	1.10667	17	6.57191	0.974851	17	6.53454	0.986827	17	6.0972	0.968354	17	5.87021	0.989887	17	4.61598	0.950975	17	9.14623	0.958243	17	7.99686	1.04767	17	8.60965	237	26.4716	4.80518
P29314	40S ribosomal protein S9 OS=Rattus norvegicus OX=10116 GN=Rps9 PE=1 SV=4 - [RS9_RAT]	375.975	53.61	4	13	14	25	0.969005	24	9.55733	0.951655	24	8.22227	1.03024	24	4.84785	1.04629	24	4.68823	0.973947	24	8.66532	1.0151	24	7.36977	1.00887	24	8.5926	1.02664	24	10.6221	0.898668	24	8.24386	194	22.5776	10.6528
A0A0G2JWD2	Fragile X mental retardation syndrome-related protein 1 OS=Rattus norvegicus OX=10116 GN=Fxr1 PE=1 SV=1 - [A0A0G2JWD2_RAT]	374.693	18.12	3	7	8	12	0.960136	11	3.91933	0.979885	11	3.46544	1.00729	11	5.52751	1.01263	11	2.69366	0.977915	11	3.92944	1.04439	11	4.10166	0.977984	11	6.55594	0.971947	11	2.17101	1.02894	11	3.62963	563	63.3506	6.39209
B2RYG2	Phosphoenolpyruvate carboxykinase (GTP) (Fragment) OS=Rattus norvegicus OX=10116 GN=Pck2 PE=2 SV=1 - [B2RYG2_RAT]	373.057	15.84	3	9	9	13	0.748915	13	18.6375	0.746849	13	23.4013	1.06141	13	5.3583	1.08048	13	4.86174	1.11029	13	4.72398	1.1085	13	2.71633	1.05867	13	3.91975	1.0929	13	7.03268	0.745387	13	12.7676	663	73.2249	8.00146
P67779	Prohibitin OS=Rattus norvegicus OX=10116 GN=Phb PE=1 SV=1 - [PHB_RAT]	372.856	41.54	4	10	12	20	0.936584	17	5.02713	0.932961	17	4.88791	1.02271	17	3.79264	1.05916	17	2.8527	1.02179	17	2.42495	1.04206	17	4.21348	1.00722	17	2.9613	1.00761	17	4.09069	0.943219	17	4.41737	272	29.8019	5.75732
A0A0G2JV81	ADP-ribosylation factor 3 OS=Rattus norvegicus OX=10116 GN=Arf3 PE=3 SV=1 - [A0A0G2JV81_RAT]	372.544	19.34	11	3	4	9	0.955386	8	7.38455	0.978983	8	3.73498	1.01787	8	4.16741	0.982113	8	1.65507	1.05712	8	2.18658	0.990422	8	6.26239	1.03613	8	4.22667	1.02087	8	3.83754	0.951389	8	5.46808	181	20.5558	7.43018
D3ZTT7	Sad1 and UNC84 domain-containing 2 OS=Rattus norvegicus OX=10116 GN=Sun2 PE=1 SV=1 - [D3ZTT7_RAT]	371.973	15.48	6	11	12	16	1.03815	15	7.346	1.01819	15	6.79076	1.01227	15	6.0806	0.971966	15	3.68178	1.02986	15	6.82966	0.98699	15	3.39124	1.05415	15	4.82763	0.998779	15	3.69781	0.985838	15	10.6105	730	81.4773	6.87354
Q5I0G4	Glycine--tRNA ligase OS=Rattus norvegicus OX=10116 GN=Gars1 PE=1 SV=2 - [GARS_RAT]	371.83	22.66	4	18	18	23	0.749531	23	11.2368	0.742328	23	9.47204	1.08513	23	5.09732	1.09595	23	5.11907	1.07815	23	9.73281	1.11028	23	8.51801	1.04883	23	7.68821	1.06369	23	6.12242	0.781216	23	18.1869	728	81.7407	6.56592
D3ZXI0	Pyrroline-5-carboxylate reductase OS=Rattus norvegicus OX=10116 GN=Pycr1 PE=3 SV=2 - [D3ZXI0_RAT]	370.122	19.78	2	3	5	8	0.714979	5	2.43852	0.757318	5	8.86211	1.06817	5	4.14801	1.14423	5	6.2806	0.991585	5	18.1861	1.19248	5	6.03537	1.00987	5	6.38502	1.02372	5	9.21264	0.875579	5	4.94931	359	37.2923	6.94678
P62198	26S proteasome regulatory subunit 8 OS=Rattus norvegicus OX=10116 GN=Psmc5 PE=1 SV=1 - [PRS8_RAT]	370.086	36.45	11	11	14	21	0.931506	16	5.23121	0.970075	16	8.56859	1.00057	16	4.34222	1.05554	16	3.46581	1.03509	16	4.72748	1.01428	16	7.08294	1.01475	16	6.3045	0.995842	16	8.37493	0.938858	16	8.03834	406	45.5971	7.54736
A0A0G2K273	Eukaryotic translation initiation factor 3 subunit E OS=Rattus norvegicus OX=10116 GN=LOC100909481 PE=3 SV=1 - [A0A0G2K273_RAT]	369.04	20.67	2	8	8	13	0.943826	13	5.87093	0.997885	13	14.2104	0.996383	13	6.0009	1.01846	13	2.84425	1.01123	13	9.41281	1.00713	13	7.16095	1.00253	13	8.24745	0.990198	13	6.52054	0.966016	13	12.5037	445	52.1953	6.03662
F1LND7	Farnesyl pyrophosphate synthase OS=Rattus norvegicus OX=10116 GN=Fdps PE=1 SV=3 - [F1LND7_RAT]	366.708	24.36	4	11	11	19	1.33578	19	8.34224	1.37031	19	7.57385	0.870245	19	8.35661	0.912196	19	4.98306	0.858215	19	9.68583	0.899066	19	3.49082	0.864643	19	8.25037	0.845452	19	8.6932	1.40196	19	10.4306	353	40.7779	5.52881
P19804	Nucleoside diphosphate kinase B OS=Rattus norvegicus OX=10116 GN=Nme2 PE=1 SV=1 - [NDKB_RAT]	366.18	49.34	4	1	7	26	0.93939	4	5.13441	1.00793	4	0.768246	1.05498	4	2.02688	1.07261	4	2.7519	0.98383	4	3.57924	1.03643	4	1.70073	0.937863	4	1.00914	0.939994	4	1.35141	1.01041	4	0.613906	152	17.2719	7.44482
G3V8T5	RuvB-like helicase OS=Rattus norvegicus OX=10116 GN=Ruvbl2 PE=1 SV=1 - [G3V8T5_RAT]	365.089	19.22	2	10	10	10	0.974135	10	4.1657	0.969708	10	6.07948	1.02145	10	4.63032	1.03082	10	1.43239	1.00093	10	4.19867	1.03685	10	2.05592	1.00734	10	3.42939	0.981161	10	1.49814	0.970889	10	9.57327	463	51.0805	5.64307
A0JPM9	Eukaryotic translation initiation factor 3 subunit J OS=Rattus norvegicus OX=10116 GN=Eif3j PE=1 SV=1 - [EIF3J_RAT]	365.036	32.05	1	8	8	13	0.896385	13	3.61826	0.890242	13	7.02132	1.03042	13	4.12282	1.05861	13	3.7656	1.03078	13	2.05165	1.07682	13	3.81557	1.03932	13	5.70751	1.01581	13	5.17792	0.901462	13	4.71825	259	29.1695	4.80518
D3ZGE6	Cortactin, isoform CRA_c OS=Rattus norvegicus OX=10116 GN=Cttn PE=1 SV=3 - [D3ZGE6_RAT]	364.932	26.74	10	13	15	22	1.02555	20	6.0394	1.01604	20	7.2679	1.01274	20	7.40636	1.00518	20	7.13483	1.0146	20	5.91951	0.99329	20	5.50206	0.983607	20	6.54142	0.976033	20	4.73244	0.9798	20	9.00131	546	61.0403	5.31299
D4A962	Heterogeneous nuclear ribonucleoprotein U-like 1 OS=Rattus norvegicus OX=10116 GN=Hnrnpul1 PE=1 SV=1 - [D4A962_RAT]	364.799	15.83	1	9	10	22	1.01672	20	11.2236	1.03895	20	8.57516	0.964502	20	4.76913	0.961907	20	3.92447	1.00419	20	10.1207	0.954688	20	6.65854	1.00974	20	8.15206	1.03521	20	4.47796	1.06542	20	14.8834	859	95.9426	6.63916
P19132	Ferritin heavy chain OS=Rattus norvegicus OX=10116 GN=Fth1 PE=1 SV=3 - [FRIH_RAT]	363.284	45.05	8	7	7	13	0.55578	13	28.4061	0.539935	13	28.1783	1.22007	13	12.1316	1.25688	13	11.9789	1.03753	13	4.88154	1.32527	13	6.44733	1.01668	13	7.29518	1.02157	13	8.2775	0.593484	13	28.4724	182	21.1133	6.30322
B1WC34	Glucosidase 2 subunit beta OS=Rattus norvegicus OX=10116 GN=Prkcsh PE=1 SV=1 - [B1WC34_RAT]	362.246	21.9	1	11	11	22	0.976593	22	7.27289	0.970805	22	4.9438	1.01156	22	6.45262	0.986871	22	5.96857	1.0022	22	6.93164	1.04481	22	5.62586	1.00801	22	7.83931	0.992517	22	4.69283	0.953501	22	7.79236	525	59.1811	4.4751
A0A0G2K9A2	Arp2/3 complex 34 kDa subunit OS=Rattus norvegicus OX=10116 GN=Arpc2 PE=1 SV=1 - [A0A0G2K9A2_RAT]	361.831	32.33	11	10	11	27	0.99192	20	3.05283	0.988775	20	4.6102	1.00571	20	2.62236	1.00241	20	3.43441	1.02312	20	3.66052	1.00191	20	5.83655	1.01569	20	4.64849	1.007	20	5.87494	0.982005	20	7.15484	300	34.3255	7.35693
P49242	40S ribosomal protein S3a OS=Rattus norvegicus OX=10116 GN=Rps3a PE=1 SV=2 - [RS3A_RAT]	361.667	49.62	5	15	16	35	1.01488	32	8.25252	1.0049	32	10.7098	1.01379	32	6.33239	1.03828	32	3.88765	1.00773	32	7.6438	1.01328	32	8.00076	0.986482	32	7.41633	1.00461	32	7.10157	0.965618	32	14.3467	264	29.9257	9.72998
D3ZTH8	Similar to 60S ribosomal protein L23a OS=Rattus norvegicus OX=10116 GN=LOC689899 PE=3 SV=1 - [D3ZTH8_RAT]	361.485	45.51	9	10	10	24	1.01476	24	5.8949	1.02443	24	7.9654	0.989952	24	5.29596	1.02013	24	2.60542	0.973547	24	5.46369	1.0266	24	5.75334	0.977064	24	5.43096	0.966379	24	5.46243	1.03782	24	11.2023	156	17.7421	10.3892
O35796	Complement component 1 Q subcomponent-binding protein, mitochondrial OS=Rattus norvegicus OX=10116 GN=C1qbp PE=1 SV=2 - [C1QBP_RAT]	360.492	13.62	3	3	3	9	0.844569	9	10.591	0.848286	9	11.2637	1.04031	9	4.39613	1.10858	9	4.85576	1.02251	9	1.90373	1.08022	9	5.73636	1.00099	9	4.04104	1.03506	9	5.08215	0.888801	9	6.07453	279	30.9775	4.86865
Q66HF9	Leucine-rich repeat flightless-interacting protein 1 OS=Rattus norvegicus OX=10116 GN=Lrrfip1 PE=1 SV=1 - [LRRF1_RAT]	359.566	16.26	12	8	10	13	0.969725	11	5.62341	0.952231	11	4.6404	1.01767	11	3.54061	1.0124	11	4.11244	1.02613	11	3.61695	1.01002	11	4.40667	1.05565	11	7.42452	1.02307	11	7.87195	0.972949	11	5.11434	738	79.9706	4.77979
D3ZUL3	Collagen type VI alpha 1 chain OS=Rattus norvegicus OX=10116 GN=Col6a1 PE=1 SV=1 - [D3ZUL3_RAT]	359.35	13.85	2	12	12	16	1.1582	16	16.4833	1.14651	16	16.3701	0.946943	16	9.21659	0.911427	16	7.51374	0.976608	16	9.43166	0.911507	16	7.25627	0.943711	16	14.039	0.976636	16	8.27002	1.17445	16	24.3354	1025	108.738	5.36377
P17077	60S ribosomal protein L9 OS=Rattus norvegicus OX=10116 GN=Rpl9 PE=1 SV=1 - [RL9_RAT]	359.194	38.54	14	9	9	19	0.980978	19	4.49373	0.985446	19	4.06365	1.01955	19	4.4465	1.03488	19	3.44957	1.00853	19	8.36911	1.05627	19	6.22939	0.988761	19	2.89715	0.992283	19	4.49794	0.985427	19	5.60772	192	21.8798	9.94971
Q5XIG8	Serine-threonine kinase receptor-associated protein OS=Rattus norvegicus OX=10116 GN=Strap PE=1 SV=1 - [STRAP_RAT]	357.015	26	1	7	7	9	1.05415	9	5.91394	1.07471	9	6.94082	0.969878	9	3.25586	1.00475	9	1.70523	0.968151	9	6.01975	1.02053	9	2.43826	0.979106	9	2.28118	0.952198	9	4.23037	1.06002	9	10.761	350	38.432	5.12256
P40615	H/ACA ribonucleoprotein complex subunit DKC1 OS=Rattus norvegicus OX=10116 GN=Dkc1 PE=1 SV=4 - [DKC1_RAT]	357.006	20.83	2	8	9	16	0.935972	14	6.21378	0.919869	14	5.93456	1.02096	14	4.51479	1.0553	14	3.27192	1.01824	14	5.00903	1.0609	14	6.17739	0.993375	14	8.45354	1.03156	14	3.62347	0.949263	14	8.67957	509	56.5798	9.37842
Q05982	Nucleoside diphosphate kinase A OS=Rattus norvegicus OX=10116 GN=Nme1 PE=1 SV=1 - [NDKA_RAT]	355.398	55.92	4	2	8	24	0.878339	2	2.04984	0.941879	2	0.478248	1.06976	2	5.16831	1.08779	2	3.07559	1.01681	2	2.53295	1.06851	2	2.74402	0.988269	2	8.04447	1.0101	2	0.420345	0.852761	2	7.6434	152	17.1818	6.32861
B0BNK1	RAB5C, member RAS oncogene family OS=Rattus norvegicus OX=10116 GN=Rab5c PE=1 SV=1 - [B0BNK1_RAT]	353.356	33.33	4	4	7	12	0.944122	6	11.6943	0.98735	6	10.3064	1.00663	6	7.233	0.908405	6	18.8116	1.07657	6	12.6586	1.01489	6	3.72036	1.15294	6	27.2568	0.953734	6	3.69059	0.842509	6	36.8097	216	23.4108	8.41162
P24368	Peptidyl-prolyl cis-trans isomerase B OS=Rattus norvegicus OX=10116 GN=Ppib PE=1 SV=3 - [PPIB_RAT]	353.128	44.91	1	11	12	29	1.13311	25	11.244	1.13689	25	8.92095	0.965242	25	4.81465	0.973311	25	4.76974	0.949531	25	7.73016	0.975427	25	7.11741	0.934404	25	10.4068	0.91753	25	8.90731	1.10514	25	12.6401	216	23.7875	9.49561
Q5EBA9	Succinate-CoA ligase subunit beta (Fragment) OS=Rattus norvegicus OX=10116 GN=Suclg2 PE=2 SV=1 - [Q5EBA9_RAT]	352.639	26.61	5	11	11	14	0.921796	14	4.57802	0.892638	14	6.31173	1.03862	14	2.89577	1.03978	14	2.74963	1.02504	14	4.45383	1.05673	14	2.1234	1.00893	14	6.13873	1.03545	14	4.51874	0.904644	14	9.19451	387	41.6948	5.84619
A0A0G2K0W9	Proteasome subunit alpha type OS=Rattus norvegicus OX=10116 GN=Psma7 PE=1 SV=1 - [A0A0G2K0W9_RAT]	351.683	41.53	12	12	13	19	0.965061	18	6.89858	1.0112	18	7.68417	1.01841	18	4.46817	1.03691	18	4.47315	0.982456	18	7.70992	1.0457	18	3.83526	0.97774	18	11.8561	0.958574	18	14.5635	0.991156	18	9.12809	248	27.8386	8.45557
D4A6G6	40S ribosomal protein S19 OS=Rattus norvegicus OX=10116 GN=LOC100362339 PE=3 SV=1 - [D4A6G6_RAT]	351.453	58.62	10	11	11	24	1.0017	24	8.99719	0.990704	24	6.98634	1.00919	24	5.04152	1.02537	24	4.8955	0.972833	24	9.64099	1.03368	24	6.61092	0.994347	24	5.69799	0.966575	24	7.38937	0.98338	24	14.617	145	16.1076	10.4038
A0A0G2JVV5	Ubiquitin carboxyl-terminal hydrolase OS=Rattus norvegicus OX=10116 GN=Usp14 PE=1 SV=1 - [A0A0G2JVV5_RAT]	351.005	25.98	5	10	11	19	0.970956	18	9.17513	0.977392	18	6.16455	0.998597	18	4.37003	1.01119	18	6.8318	1.00285	18	9.76639	1.01234	18	8.81578	1.00921	18	8.35619	0.987651	18	6.95397	0.986501	18	8.22914	458	52.2602	5.5542
A0A140TAI8	S-adenosylhomocysteine hydrolase-like protein 1 OS=Rattus norvegicus OX=10116 GN=Ahcyl1 PE=1 SV=1 - [A0A140TAI8_RAT]	349.595	24.21	3	11	12	18	0.900271	16	6.41808	0.927907	16	4.77457	1.03579	16	4.66863	1.03372	16	3.79664	1.02979	16	6.02179	1.05391	16	3.90257	1.01908	16	10.6738	1.01317	16	5.32532	0.904853	16	7.0223	475	52.8616	7.97217
A0A0G2K0D7	Proteasome endopeptidase complex OS=Rattus norvegicus OX=10116 GN=Psma6 PE=1 SV=1 - [A0A0G2K0D7_RAT]	349.206	33.48	2	7	7	12	1.03722	12	10.812	0.933449	12	14.1843	1.00326	12	5.99758	1.03874	12	5.76677	0.98536	12	5.00538	1.01836	12	8.2075	0.993419	12	9.67507	0.993933	12	8.72775	0.97229	12	19.2037	227	25.3019	7.85498
Q5RJN5	Nol5a protein (Fragment) OS=Rattus norvegicus OX=10116 GN=Nol5a PE=2 SV=1 - [Q5RJN5_RAT]	349.099	13.63	2	7	7	8	0.923491	8	3.78458	0.895323	8	1.81463	1.02657	8	2.87101	1.04643	8	4.32572	1.01523	8	2.13943	1.07181	8	1.42021	1.00949	8	3.80951	1.0227	8	5.15756	0.923578	8	3.99854	499	55.4693	9.31982
F1LYQ8	FERM, ARHGEF and pleckstrin domain-containing protein 1 OS=Rattus norvegicus OX=10116 GN=Farp1 PE=1 SV=2 - [FARP1_RAT]	348.888	10.39	1	7	7	9	1.10763	9	16.8181	1.09522	9	7.78025	0.970826	9	8.38456	0.958646	9	4.13508	0.955888	9	7.20971	0.964353	9	6.19209	0.95397	9	18.3101	1.01573	9	10.5273	1.06078	9	10.3015	1049	118.768	7.95752
Q9QX80	CArG-binding factor A OS=Rattus norvegicus OX=10116 GN=Hnrnpab PE=1 SV=1 - [Q9QX80_RAT]	348.287	37.19	6	11	14	21	1.04549	16	5.38308	1.01927	16	6.35625	1.0008	16	8.47353	0.996023	16	4.78062	0.981637	16	5.29539	1.00177	16	6.4206	0.948732	16	9.25555	0.944371	16	8.03341	1.07459	16	8.89853	285	30.8343	7.91357
A1L1J8	RAB5B, member RAS oncogene family OS=Rattus norvegicus OX=10116 GN=Rab5b PE=1 SV=1 - [A1L1J8_RAT]	347.979	30.7	3	3	6	12	0.990774	6	5.10445	0.989338	6	11.0319	1.03844	6	4.02435	0.975759	6	3.56265	1.01323	6	5.03474	0.969168	6	5.80373	1.03363	6	6.82634	1.00583	6	7.03053	0.942161	6	7.9122	215	23.6599	8.1333
F1LST1	Fibronectin OS=Rattus norvegicus OX=10116 GN=Fn1 PE=1 SV=3 - [F1LST1_RAT]	347.392	9.64	3	19	19	25	1.15987	25	8.01607	1.19213	25	12.2798	0.927717	25	7.58243	0.934246	25	4.08082	0.932705	25	6.50369	0.939675	25	4.26296	0.953045	25	6.75734	0.955762	25	7.36801	1.18863	25	9.86775	2387	262.591	5.80811
M0RDM4	Histone H2A OS=Rattus norvegicus OX=10116 GN=LOC680322 PE=3 SV=1 - [M0RDM4_RAT]	347.175	33.59	8	3	7	28	1.25666	5	1.91396	1.21825	5	1.49492	0.865972	5	7.49789	0.927673	5	13.9726	0.903757	5	1.73389	0.891231	5	3.54096	0.81971	5	13.1102	0.835135	5	15.4199	1.32065	5	30.8673	128	14.0599	11.0337
Q68FS2	COP9 signalosome complex subunit 4 OS=Rattus norvegicus OX=10116 GN=Cops4 PE=1 SV=1 - [CSN4_RAT]	346.654	19.46	25	5	7	10	0.96899	8	3.76352	0.979794	8	7.01658	0.969164	8	1.71717	1.02408	8	3.38089	1.01374	8	3.99966	1.00684	8	4.42673	1.01593	8	8.22775	1.01195	8	3.7631	0.997681	8	6.9863	406	46.2607	5.84619
P00388	NADPH--cytochrome P450 reductase OS=Rattus norvegicus OX=10116 GN=Por PE=1 SV=3 - [NCPR_RAT]	346.529	13.86	9	8	9	15	1.02692	14	7.06428	1.01234	14	8.53642	1.00853	14	7.60306	1.00061	14	2.48667	0.959737	14	6.87662	1.0066	14	8.09873	0.993058	14	4.2099	0.969474	14	7.0778	1.02927	14	11.0096	678	76.9142	5.47803
A9UMV8	Histone H2A.J OS=Rattus norvegicus OX=10116 GN=H2aj PE=2 SV=1 - [H2AJ_RAT]	344.846	32.56	3	1	7	30	1.35303	1		0.998774	1		0.928509	1		0.982484	1		1.00286	1		0.910882	1		0.918058	1		0.958017	1		1.11293	1		129	14.037	11.0483
D3ZIE9	Delta-1-pyrroline-5-carboxylate synthase OS=Rattus norvegicus OX=10116 GN=Aldh18a1 PE=3 SV=1 - [D3ZIE9_RAT]	344.692	17.61	1	14	14	21	0.898205	21	6.4105	0.874535	21	8.74287	1.057	21	4.28776	1.0392	21	3.58276	1.05436	21	6.77716	1.07064	21	7.55083	1.02158	21	6.49059	1.04492	21	11.3819	0.890395	21	11.4222	795	87.275	7.56201
G3V681	DNA helicase OS=Rattus norvegicus OX=10116 GN=Mcm4 PE=1 SV=1 - [G3V681_RAT]	344.544	12.3	18	8	9	12	1.33455	10	15.0417	1.29629	10	11.8232	0.87534	10	7.70034	0.899609	10	4.54711	0.896282	10	9.7861	0.882328	10	4.51653	0.883845	10	17.1889	0.884118	10	11.623	1.3161	10	17.2259	862	96.5104	7.2251
A0A0G2K681	CAP-Gly domain-containing linker protein 1 OS=Rattus norvegicus OX=10116 GN=Clip1 PE=1 SV=1 - [A0A0G2K681_RAT]	344.115	9.53	8	8	12	13	0.98496	9	5.77586	0.995827	9	16.1251	1.0021	9	2.10182	1.00167	9	3.81765	1.02003	9	7.6458	1.03766	9	1.186	0.992367	9	7.01627	0.997576	9	5.39845	1.07148	9	3.94539	1416	159.367	5.16064
Q4QQV4	Histidine--tRNA ligase, cytoplasmic OS=Rattus norvegicus OX=10116 GN=Hars PE=1 SV=1 - [Q4QQV4_RAT]	344.043	22.44	6	12	12	19	0.93114	18	10.235	0.948058	18	10.9855	1.04514	18	5.67631	1.00217	18	5.5357	1.02968	18	5.4508	1.03744	18	4.57079	1.03791	18	10.5845	1.04037	18	6.05096	0.970391	18	12.4709	508	57.3241	6.11279
D4A9P7	BolA family member 2 OS=Rattus norvegicus OX=10116 GN=Bola2 PE=1 SV=1 - [D4A9P7_RAT]	343.319	50	1	3	3	9	0.966042	9	6.32782	1.0011	9	10.6986	1.03941	9	2.76382	1.02856	9	4.60711	0.929912	9	11.6417	1.0611	9	6.15929	0.981835	9	13.7539	0.929419	9	7.68303	1.00314	9	11.3145	86	10.1802	5.78271
Q5U2Z4	Nuclear factor kappa B subunit 2 OS=Rattus norvegicus OX=10116 GN=Nfkb2 PE=1 SV=1 - [Q5U2Z4_RAT]	343.049	15.59	1	10	10	13	0.790027	13	5.87174	0.795232	13	11.2778	1.1242	13	4.27985	1.10845	13	12.2933	1.02621	13	7.39701	1.12676	13	13.7124	1.01427	13	4.84412	1.04412	13	6.29467	0.806662	13	10.3667	898	96.6789	6.32861
P50398	Rab GDP dissociation inhibitor alpha OS=Rattus norvegicus OX=10116 GN=Gdi1 PE=1 SV=1 - [GDIA_RAT]	342.691	20.36	4	5	8	14	0.871731	8	6.60908	0.860078	8	7.67552	1.07402	8	5.44024	1.07155	8	10.1422	1.04137	8	2.15423	1.10562	8	6.61259	1.06383	8	1.73556	1.05203	8	7.97132	0.838133	8	5.40447	447	50.5042	5.13525
D3ZU74	Cytoplasmic dynein 1 intermediate chain 2 OS=Rattus norvegicus OX=10116 GN=Dync1i2 PE=1 SV=1 - [D3ZU74_RAT]	341.864	16.5	25	10	12	17	0.965329	15	6.12414	0.962217	15	6.40582	1.00203	15	5.7439	1.00727	15	2.72652	1.01533	15	7.27448	1.01722	15	8.01982	1.00317	15	6.37054	1.01178	15	6.66534	0.986338	15	2.98326	612	68.3207	5.2876
P84100	60S ribosomal protein L19 OS=Rattus norvegicus OX=10116 GN=Rpl19 PE=1 SV=1 - [RL19_RAT]	341.817	39.8	9	11	12	23	0.987927	19	6.58837	0.945978	19	8.60634	1.01714	19	4.90307	1.02336	19	4.05648	1.00647	19	3.50052	1.04895	19	3.52516	0.978447	19	3.67999	0.998863	19	9.11723	0.9757	19	8.80578	196	23.4512	11.4731
Q66HR2	Microtubule-associated protein RP/EB family member 1 OS=Rattus norvegicus OX=10116 GN=Mapre1 PE=1 SV=3 - [MARE1_RAT]	341.799	48.13	7	11	11	20	1.09562	20	3.94013	1.0589	20	6.18945	0.973961	20	6.83691	0.972941	20	4.5581	0.987505	20	5.92179	0.96836	20	4.07272	0.994374	20	4.94421	0.977645	20	5.59608	1.08108	20	6.7863	268	29.9852	5.22412
Q63357	Unconventional myosin-Id OS=Rattus norvegicus OX=10116 GN=Myo1d PE=1 SV=3 - [MYO1D_RAT]	340.304	7.55	23	7	10	14	1.13808	11	6.96155	1.16304	11	7.11129	0.983135	11	2.02756	0.946794	11	6.23585	0.956633	11	2.48659	0.952618	11	4.02632	0.958234	11	9.91485	0.947223	11	6.20833	1.15608	11	4.71375	1006	116.021	9.40771
F1LMC7	Septin-7 OS=Rattus norvegicus OX=10116 GN=Sept7 PE=1 SV=3 - [F1LMC7_RAT]	339.564	30.05	36	14	16	25	1.07211	22	5.68344	1.06808	22	10.2218	0.962473	22	4.61364	0.981304	22	2.49709	0.996471	22	9.67676	0.941718	22	5.24161	0.996122	22	8.92206	1.00296	22	6.4193	1.05943	22	16.4281	436	50.5479	8.57275
A0A0H2UHQ8	40S ribosomal protein S17 OS=Rattus norvegicus OX=10116 GN=Rps17 PE=3 SV=1 - [A0A0H2UHQ8_RAT]	339.412	35.82	18	5	7	15	1.00216	13	5.15373	1.00118	13	6.11526	1.02103	13	3.95626	1.08184	13	3.49511	0.967	13	7.41287	1.08197	13	6.51668	0.947989	13	6.60007	0.952013	13	3.17543	1.00068	13	4.66131	134	15.3693	9.77393
B2RYP6	LUC7-like 2 (S. cerevisiae) OS=Rattus norvegicus OX=10116 GN=Luc7l2 PE=1 SV=1 - [B2RYP6_RAT]	337.907	15.56	1	4	6	10	1.15614	8	8.4007	1.15449	8	6.72825	0.930224	8	4.59964	0.980846	8	3.04622	0.938698	8	5.45445	0.95691	8	2.5333	0.918336	8	0.918623	0.960427	8	8.14382	1.17422	8	3.75902	392	46.5547	10.0962
F1LRI5	GCN1 activator of EIF2AK4 OS=Rattus norvegicus OX=10116 GN=Gcn1 PE=1 SV=3 - [F1LRI5_RAT]	337.676	7.49	2	19	20	24	0.99249	23	7.47019	0.97616	23	5.07819	1.02382	23	4.39731	1.02586	23	3.79673	0.99711	23	5.43576	1.02201	23	4.12133	1.02126	23	8.30476	1.00487	23	7.14421	0.96624	23	9.67981	2671	292.886	7.29834
D3ZWZ6	Insulin-like growth factor 2 mRNA-binding protein 2 OS=Rattus norvegicus OX=10116 GN=Igf2bp2 PE=1 SV=3 - [D3ZWZ6_RAT]	337.555	15.03	2	8	8	10	0.903976	10	7.22779	0.902405	10	5.21498	1.05502	10	4.18964	1.04328	10	1.65078	1.06304	10	2.699	1.03099	10	4.96461	1.05156	10	10.3925	1.05979	10	3.44495	0.89223	10	10.3716	592	65.3642	8.25049
P80254	D-dopachrome decarboxylase OS=Rattus norvegicus OX=10116 GN=Ddt PE=1 SV=3 - [DOPD_RAT]	337.541	33.9	1	3	3	10	0.915619	10	9.30388	0.987035	10	3.44875	1.04244	10	3.51853	1.08093	10	4.91812	0.962409	10	4.08774	1.04013	10	4.2412	1.01465	10	9.53178	0.981544	10	4.99457	0.921324	10	8.40749	118	13.1248	6.53662
Q5U3Z7	Serine hydroxymethyltransferase OS=Rattus norvegicus OX=10116 GN=Shmt2 PE=1 SV=1 - [Q5U3Z7_RAT]	337.195	23.81	2	13	14	20	0.780785	19	4.15631	0.749363	19	9.71479	1.10873	19	4.22094	1.08446	19	10.3112	1.06128	19	6.78429	1.07502	19	8.24594	1.07536	19	8.13094	1.08536	19	5.83218	0.779841	19	14.2387	504	55.7296	8.20654
Q6IRJ7	Annexin OS=Rattus norvegicus OX=10116 GN=Anxa7 PE=1 SV=1 - [Q6IRJ7_RAT]	335.468	18.79	2	8	8	10	0.989963	10	5.155	1.01074	10	5.49464	0.999301	10	7.29119	1.04066	10	3.58361	0.970597	10	2.20888	1.05266	10	4.23087	0.988001	10	4.06892	0.997377	10	3.13056	1.00237	10	5.47522	463	49.9873	6.17627
Q6AXW2	RCG25684, isoform CRA_a OS=Rattus norvegicus OX=10116 GN=Tmod3 PE=1 SV=1 - [Q6AXW2_RAT]	334.546	33.24	8	12	12	15	1.01639	15	4.54359	0.981571	15	4.4274	0.993278	15	2.97987	1.00384	15	2.97544	1.01664	15	5.76497	1.01722	15	4.53309	1.02093	15	8.1555	0.990683	15	6.61198	0.983626	15	8.14244	352	39.4471	4.89404
G3V6H2	Pre-mRNA processing factor 8, isoform CRA_a OS=Rattus norvegicus OX=10116 GN=Prpf8 PE=1 SV=1 - [G3V6H2_RAT]	332.946	7.84	2	19	19	21	1.01188	21	4.35304	1.02243	21	9.16359	1.00608	21	5.12368	1.00738	21	4.697	0.9855	21	9.25891	0.979722	21	6.76787	0.98941	21	10.3964	1.01716	21	10.0936	0.975254	21	10.4594	2335	273.443	8.83643
D4A9L2	Serine/arginine-rich splicing factor 1 OS=Rattus norvegicus OX=10116 GN=Srsf1 PE=1 SV=1 - [D4A9L2_RAT]	332.853	43.55	1	12	13	20	1.09452	19	8.55457	1.08055	19	9.89525	0.949319	19	3.43467	0.978329	19	3.98847	0.999382	19	2.96574	0.962475	19	4.57369	0.955042	19	9.5011	0.98959	19	9.05468	1.08928	19	10.0472	248	27.7278	10.3599
A0A0G2JSW0	Myosin regulatory light chain 12B OS=Rattus norvegicus OX=10116 GN=Myl12b PE=4 SV=1 - [A0A0G2JSW0_RAT]	331.102	33.72	6	7	7	13	1.0163	13	4.5187	1.02299	13	7.72623	0.979206	13	4.15083	1.00419	13	6.0439	1.00728	13	7.22949	1.01637	13	2.91129	1.0369	13	3.35787	0.985446	13	5.63749	0.950413	13	5.8959	172	19.7665	4.84326
Q32PX7	Far upstream element-binding protein 1 OS=Rattus norvegicus OX=10116 GN=Fubp1 PE=1 SV=1 - [FUBP1_RAT]	330.61	21.6	7	8	13	21	1.04145	11	7.44346	1.00413	11	9.95173	0.950801	11	8.87624	0.964214	11	5.39863	0.983636	11	13.4177	0.935762	11	7.39285	1.11094	11	20.5353	1.01868	11	8.62223	1.02985	11	4.6613	639	67.1553	7.60596
A0A0G2K9V6	Threonyl-tRNA synthetase OS=Rattus norvegicus OX=10116 GN=Tars PE=1 SV=1 - [A0A0G2K9V6_RAT]	329.955	22.99	9	18	18	25	0.819526	25	8.07028	0.846779	25	6.94535	1.05213	25	7.56011	1.0646	25	5.56344	1.04886	25	5.25827	1.0853	25	4.57379	1.03972	25	3.60162	1.05339	25	5.82467	0.86039	25	10.7989	722	83.3359	7.03467
B0BMW2	3-hydroxyacyl-CoA dehydrogenase type-2 OS=Rattus norvegicus OX=10116 GN=Hsd17b10 PE=1 SV=1 - [B0BMW2_RAT]	329.93	27.59	2	5	5	9	0.98691	8	5.08848	1.00412	8	1.5151	0.993445	8	3.4093	1.0091	8	3.50168	0.993874	8	4.60292	1.00139	8	3.7302	1.00205	8	4.79926	1.01296	8	5.45479	1.03045	8	2.76255	261	27.2325	8.5874
P12368	cAMP-dependent protein kinase type II-alpha regulatory subunit OS=Rattus norvegicus OX=10116 GN=Prkar2a PE=1 SV=4 - [KAP2_RAT]	329.224	24.44	2	9	9	12	1.02098	12	6.17523	1.07363	12	6.58765	0.963826	12	4.06791	1.01358	12	3.30187	0.94534	12	8.25253	1.02407	12	4.70529	0.957428	12	6.92181	0.958642	12	4.17737	1.08445	12	7.08248	401	45.4517	4.93213
Q4KLF8	Actin-related protein 2/3 complex subunit 5 OS=Rattus norvegicus OX=10116 GN=Arpc5 PE=1 SV=3 - [ARPC5_RAT]	329.132	68.87	3	7	9	14	1.01939	11	7.73459	1.04989	11	9.83571	0.98565	11	4.9061	1.00067	11	4.70468	0.993245	11	7.85876	1.00847	11	11.8897	1.00084	11	16.1909	0.976707	11	8.62919	1.05786	11	16.5964	151	16.3103	5.66846
D4ABK7	Heterogeneous nuclear ribonucleoprotein H3 (2H9) (Predicted), isoform CRA_c OS=Rattus norvegicus OX=10116 GN=Hnrnph3 PE=1 SV=1 - [D4ABK7_RAT]	328.743	6.36	1	2	2	7	1.0159	7	5.87728	0.962665	7	8.28237	1.00823	7	6.73151	1.00721	7	5.91641	1.08242	7	4.53467	0.934193	7	4.41031	1.02416	7	4.20181	1.05982	7	4.97351	0.973004	7	12.7233	346	36.8461	6.87354
G3V6H0	RCG48149, isoform CRA_b OS=Rattus norvegicus OX=10116 GN=LOC100363782 PE=1 SV=1 - [G3V6H0_RAT]	327.721	40.8	15	4	10	15	1.0748	4	9.68488	1.01005	4	7.33241	0.983874	4	2.10976	0.958458	4	2.08029	0.989186	4	2.23064	0.936332	4	2.86503	1.01278	4	9.27541	1.00015	4	6.05905	1.07138	4	16.4331	201	22.1632	5.73193
Q68FS4	Cytosol aminopeptidase OS=Rattus norvegicus OX=10116 GN=Lap3 PE=1 SV=1 - [AMPL_RAT]	327.167	24.66	1	10	10	12	0.950192	12	6.50736	0.959077	12	7.49614	1.00455	12	2.30101	1.01249	12	3.0555	1.01042	12	3.94668	1.0474	12	4.89272	1.03888	12	2.72017	1.0284	12	3.59989	0.961644	12	9.96827	519	56.1147	7.21045
Q32PZ7	Signal recognition particle subunit SRP72 (Fragment) OS=Rattus norvegicus OX=10116 GN=Srp72 PE=2 SV=1 - [Q32PZ7_RAT]	326.775	15.7	2	2	5	8	0.940616	4	2.25696	0.963245	4	5.54174	1.03791	4	1.04315	1.04272	4	7.72056	0.960243	4	2.33572	1.01655	4	3.98606	0.985044	4	6.23631	0.976464	4	1.77419	1.00521	4	4.58113	395	43.7932	9.84717
D4A9D6	RNA helicase OS=Rattus norvegicus OX=10116 GN=Dhx9 PE=1 SV=1 - [D4A9D6_RAT]	326.368	11.24	2	13	14	19	1.09092	18	8.03418	1.07972	18	8.70074	0.952721	18	3.60347	0.98345	18	4.15987	0.937911	18	5.43604	0.978882	18	3.66381	0.952713	18	8.20175	0.979469	18	4.56685	1.07741	18	4.4802	1174	131.647	6.354
E2RUH2	Ribonuclease inhibitor OS=Rattus norvegicus OX=10116 GN=Rnh1 PE=1 SV=1 - [E2RUH2_RAT]	326.347	20.18	3	9	9	10	1.02821	10	5.28482	1.01605	10	6.51113	1.01009	10	4.84316	1.04552	10	3.8364	0.982964	10	8.52397	1.03952	10	3.75595	0.928996	10	10.9206	0.975659	10	10.3426	1.03189	10	8.95843	456	49.8871	4.79248
Q5U2T9	Peptidylprolyl isomerase OS=Rattus norvegicus OX=10116 GN=Fkbp5 PE=1 SV=1 - [Q5U2T9_RAT]	326.335	21.05	6	8	10	14	1.01125	11	6.62388	1.00011	11	6.96642	0.972631	11	5.63811	1.03747	11	4.51126	0.985538	11	9.29957	1.03867	11	3.76556	1.00471	11	3.6348	0.976699	11	4.32226	0.993981	11	10.0392	456	50.9326	6.16357
Q6P799	Serine--tRNA ligase, cytoplasmic OS=Rattus norvegicus OX=10116 GN=Sars1 PE=1 SV=3 - [SYSC_RAT]	325.462	20.31	8	10	12	22	0.855452	20	19.5549	0.812765	20	16.6082	1.0701	20	7.48642	1.07695	20	7.37715	1.0899	20	4.70783	1.08557	20	7.85387	1.06517	20	6.61968	1.05006	20	8.76422	0.803566	20	20.4765	512	58.5508	6.18896
Q1JU68	Eukaryotic translation initiation factor 3 subunit A OS=Rattus norvegicus OX=10116 GN=Eif3a PE=2 SV=2 - [EIF3A_RAT]	325.423	26	35	34	40	50	0.989114	44	5.40173	0.984088	44	5.68433	1.00666	44	4.53268	1.01144	44	2.66841	1.01114	44	6.3227	1.00265	44	6.26701	1.00894	44	6.50373	1.01458	44	6.7447	1.00875	44	9.2889	1354	163.097	6.771
Q9EST6	Acidic leucine-rich nuclear phosphoprotein 32 family member B OS=Rattus norvegicus OX=10116 GN=Anp32b PE=1 SV=1 - [AN32B_RAT]	325.23	23.9	2	7	9	17	1.04302	12	7.02665	1.09139	12	5.27757	1.00075	12	4.31435	0.987657	12	2.30461	0.979458	12	5.86211	0.991837	12	2.25698	0.993481	12	3.62	0.977234	12	2.81636	1.06	12	2.764	272	31.042	3.99268
A0A0G2JXB1	Galectin OS=Rattus norvegicus OX=10116 GN=Lgals3 PE=1 SV=1 - [A0A0G2JXB1_RAT]	324.967	22.22	8	6	6	15	0.911658	15	9.24066	0.91019	15	8.69091	1.03919	15	3.8303	1.03554	15	7.59762	1.06528	15	2.76655	1.01819	15	4.03045	1.03184	15	4.42376	1.06761	15	3.93207	0.893603	15	8.03849	252	26.319	8.57275
Q63945	Protein SET OS=Rattus norvegicus OX=10116 GN=Set PE=2 SV=2 - [SET_RAT]	323.933	19.72	7	6	6	13	0.954834	13	6.56348	0.950497	13	9.04317	1.02156	13	4.62623	1.00211	13	3.43987	1.04647	13	6.80254	0.997317	13	6.8746	1.04422	13	3.33909	1.03157	13	4.11155	0.942026	13	10.942	289	33.3857	4.32275
Q5M7U6	Actin-related protein 2 OS=Rattus norvegicus OX=10116 GN=Actr2 PE=2 SV=1 - [ARP2_RAT]	322.967	31.47	2	11	14	24	0.972809	18	4.95309	0.972352	18	11.2305	0.995134	18	5.31417	1.01689	18	5.37298	0.98818	18	7.26524	1.01752	18	5.38815	1.01358	18	13.1656	0.99845	18	8.1529	1.02556	18	15.8723	394	44.7052	6.7417
O35115	Four and a half LIM domains protein 2 OS=Rattus norvegicus OX=10116 GN=Fhl2 PE=1 SV=1 - [FHL2_RAT]	322.581	28.67	2	9	9	12	1.09434	12	5.81118	1.11995	12	12.3968	0.960926	12	5.49278	0.957203	12	5.91696	0.937263	12	8.02061	0.982957	12	6.02252	0.923722	12	11.0792	0.965107	12	9.10624	1.16001	12	11.6334	279	32.0645	7.29834
F1MAA3	Serine/threonine-protein phosphatase 2A 56 kDa regulatory subunit OS=Rattus norvegicus OX=10116 GN=Ppp2r5d PE=1 SV=2 - [F1MAA3_RAT]	320.463	9.58	2	4	4	8	1.09041	8	9.90871	1.10353	8	10.0694	0.917996	8	5.14491	0.932471	8	10.1788	0.980664	8	11.2357	0.960337	8	5.67399	0.947644	8	9.57345	1.02598	8	5.04236	1.10886	8	11.7413	595	69.14	8.17725
Q5EAJ6	Inhibitor of nuclear factor kappa-B kinase-interacting protein OS=Rattus norvegicus OX=10116 GN=Ikbip PE=2 SV=1 - [IKIP_RAT]	319.408	18.23	18	6	8	16	1.0993	10	5.30809	1.09834	10	7.6031	0.933953	10	5.424	0.971694	10	2.16403	0.978304	10	3.92745	0.957547	10	4.03433	0.984468	10	2.97399	0.980845	10	3.79333	1.06097	10	5.63489	373	42.3343	4.90674
D3ZMS1	Splicing factor 3b, subunit 2 OS=Rattus norvegicus OX=10116 GN=Sf3b2 PE=1 SV=3 - [D3ZMS1_RAT]	319.337	13.33	3	11	11	16	1.05055	16	9.76138	1.05276	16	6.56556	0.980859	16	1.83538	0.966348	16	4.66846	1.01294	16	6.56193	0.978092	16	6.22124	0.979967	16	8.29711	0.979716	16	9.13129	1.01912	16	6.07689	878	98.0859	5.61768
D4AE96	Importin 7 OS=Rattus norvegicus OX=10116 GN=Ipo7 PE=1 SV=1 - [D4AE96_RAT]	317.535	15.51	13	14	16	19	0.931532	17	9.20394	0.969511	17	10.6129	1.01033	17	5.936	1.04673	17	4.20082	0.988517	17	9.75811	1.02898	17	6.09899	1.0203	17	11.9273	0.972749	17	7.79764	0.98921	17	17.8929	1038	119.412	4.81787
D3ZLL8	40S ribosomal protein S15a OS=Rattus norvegicus OX=10116 GN=LOC100909878 PE=3 SV=1 - [D3ZLL8_RAT]	317.328	50.77	8	9	9	21	0.939894	18	9.63737	0.952008	18	6.96695	1.03905	18	4.02062	0.982916	18	9.37057	1.06152	18	7.01455	0.93791	18	8.43615	1.03789	18	11.0492	1.02843	18	8.88106	0.898056	18	7.1551	130	14.8449	10.1255
P62836	Ras-related protein Rap-1A OS=Rattus norvegicus OX=10116 GN=Rap1a PE=1 SV=1 - [RAP1A_RAT]	315.684	36.96	10	3	7	14	1.06832	6	3.17457	1.1069	6	5.58335	1.00427	6	2.82896	0.992554	6	1.17548	0.94478	6	1.43977	1.0014	6	2.24751	0.934047	6	3.10162	0.930671	6	4.3861	1.1164	6	5.43376	184	20.9737	6.66846
A0A0H2UHH9	40S ribosomal protein S24 OS=Rattus norvegicus OX=10116 GN=Rps24 PE=3 SV=1 - [A0A0H2UHH9_RAT]	315.087	38.93	6	6	7	23	0.943632	20	11.2533	0.975048	20	5.11546	1.02241	20	4.14601	1.02953	20	4.50677	1.01831	20	6.1487	1.01242	20	4.72081	0.996293	20	3.74767	0.982193	20	6.54133	0.96509	20	10.1433	131	15.1873	10.8872
P17136	Small nuclear ribonucleoprotein-associated protein B OS=Rattus norvegicus OX=10116 GN=Snrpb PE=2 SV=2 - [RSMB_RAT]	314.697	18.18	4	5	5	16	1.03011	16	3.26417	1.0134	16	8.19192	0.995967	16	4.74819	1.01599	16	3.93002	0.974726	16	4.74133	0.999234	16	3.16815	0.977643	16	7.28312	1.00304	16	6.47544	1.01524	16	8.73186	231	23.6402	10.9019
P23514	Coatomer subunit beta OS=Rattus norvegicus OX=10116 GN=Copb1 PE=1 SV=1 - [COPB_RAT]	314.4	15.53	35	12	16	24	1.02291	20	5.81338	1.04143	20	7.0557	0.950271	20	4.66403	1.01788	20	3.17766	0.967585	20	5.33176	1.02673	20	5.23449	0.981623	20	4.49843	0.985724	20	4.5275	1.05231	20	9.94689	953	106.943	5.96045
G3V8T4	DNA damage-binding protein 1 OS=Rattus norvegicus OX=10116 GN=Ddb1 PE=1 SV=1 - [G3V8T4_RAT]	313.253	10.7	2	11	11	17	1.0991	17	8.0143	1.10601	17	8.62266	0.951547	17	6.11429	1.00719	17	1.7313	0.90815	17	6.69299	1.00996	17	5.20595	0.946119	17	6.9927	0.92629	17	9.19038	1.11258	17	8.59794	1140	126.86	5.26221
P47875	Cysteine and glycine-rich protein 1 OS=Rattus norvegicus OX=10116 GN=Csrp1 PE=1 SV=2 - [CSRP1_RAT]	312.596	54.92	1	7	9	15	1.03126	13	5.70456	1.06231	13	5.1544	0.943309	13	8.4553	1.01018	13	4.21388	0.946638	13	6.28245	1.03926	13	5.34112	0.92499	13	11.1701	0.966767	13	10.4551	1.13272	13	6.94909	193	20.5998	8.57275
Q7M0E3	Destrin OS=Rattus norvegicus OX=10116 GN=Dstn PE=1 SV=3 - [DEST_RAT]	312.111	49.09	2	10	11	23	1.06286	19	8.99936	1.05921	19	10.898	1.04622	19	5.32893	1.01481	19	5.0447	0.972278	19	6.52026	1.00994	19	7.45235	0.966518	19	11.0022	0.964835	19	5.50202	1.02115	19	10.1721	165	18.5215	8.03076
Q5XIM7	Lysine--tRNA ligase OS=Rattus norvegicus OX=10116 GN=Kars1 PE=1 SV=1 - [SYK_RAT]	311.49	18.37	3	11	11	15	0.955699	15	8.07449	0.949461	15	4.82669	1.03531	15	2.3821	1.02907	15	1.97597	0.994834	15	5.23531	1.02422	15	2.89563	1.0217	15	5.83344	0.999095	15	4.74238	0.944065	15	7.39893	626	71.5776	6.59521
D4A4J0	FACT complex subunit OS=Rattus norvegicus OX=10116 GN=Supt16h PE=1 SV=1 - [D4A4J0_RAT]	310.699	12.13	7	13	13	17	1.02837	17	3.44091	1.01266	17	4.54135	0.966558	17	5.16269	1.01396	17	4.07032	0.992012	17	6.27713	1.02611	17	4.59841	0.994858	17	7.30022	0.999133	17	4.07393	0.990278	17	10.4312	1047	119.79	5.65576
Q5RKI5	FLII, actin-remodeling protein OS=Rattus norvegicus OX=10116 GN=Flii PE=1 SV=1 - [Q5RKI5_RAT]	310.665	8.66	1	10	10	12	1.03302	12	5.3968	1.02348	12	5.76395	0.976627	12	4.4183	0.981488	12	5.33087	0.996949	12	5.53234	0.960694	12	6.36191	0.983578	12	12.1086	1.00986	12	5.99056	1.03536	12	11.3621	1270	144.766	5.99854
F1M8K0	Alpha-dystroglycan OS=Rattus norvegicus OX=10116 GN=Dag1 PE=1 SV=1 - [F1M8K0_RAT]	310.583	7.39	2	5	5	10	1.2147	10	12.6438	1.23691	10	7.45788	0.934981	10	4.78324	0.969385	10	4.21938	0.908021	10	5.60288	0.953275	10	3.0198	0.922137	10	7.92602	0.928256	10	7.72788	1.24556	10	8.17046	893	96.6463	8.44092
Q5XI77	Annexin OS=Rattus norvegicus OX=10116 GN=Anxa11 PE=1 SV=1 - [Q5XI77_RAT]	310.512	16.5	2	7	8	14	1.05374	11	14.9506	1.10028	11	9.14048	0.972192	11	3.37217	0.986884	11	6.39401	0.943492	11	8.65553	0.996371	11	4.01081	0.985469	11	5.71352	0.964534	11	6.11133	1.05947	11	11.6138	503	54.1258	7.6499
P36201	Cysteine-rich protein 2 OS=Rattus norvegicus OX=10116 GN=Crip2 PE=2 SV=1 - [CRIP2_RAT]	310.397	39.9	2	5	5	10	1.33623	10	12.9528	1.36125	10	16.1691	0.808148	10	5.75345	0.87522	10	4.49246	0.856533	10	10.2088	0.890197	10	4.24813	0.836056	10	16.5761	0.837912	10	11.9416	1.41808	10	17.3389	208	22.6811	8.63135
P05942	Protein S100-A4 OS=Rattus norvegicus OX=10116 GN=S100a4 PE=2 SV=1 - [S10A4_RAT]	310.077	40.59	6	6	7	27	1.0855	24	11.9577	1.12377	24	9.16476	0.963948	24	4.86262	0.95152	24	7.06062	0.959804	24	8.80364	0.967137	24	9.69328	0.990169	24	7.62412	0.943	24	8.37352	1.11198	24	11.7304	101	11.7687	5.12256
B0K020	CDGSH iron-sulfur domain-containing protein 1 OS=Rattus norvegicus OX=10116 GN=Cisd1 PE=3 SV=1 - [CISD1_RAT]	309.297	49.07	1	5	5	12	0.872989	12	6.67902	0.896663	12	10.4357	1.05562	12	5.49483	1.04504	12	3.25877	1.0303	12	5.62472	1.05326	12	2.80383	1.02412	12	4.25181	1.01704	12	8.7691	0.910563	12	5.5266	108	12.0891	8.83643
A0A0G2JSV3	Ribose-phosphate diphosphokinase OS=Rattus norvegicus OX=10116 GN=LOC314140 PE=1 SV=1 - [A0A0G2JSV3_RAT]	308.651	16.98	5	3	7	12	0.855296	6	9.46718	0.82743	6	6.11071	1.0727	6	2.95735	1.0196	6	9.83717	1.03515	6	3.04163	1.0255	6	10.1557	1.05104	6	11.7116	1.00719	6	8.95567	0.840056	6	14.0128	318	34.7839	6.97607
I6L9G6	TAR DNA-binding protein 43 OS=Rattus norvegicus OX=10116 GN=Tardbp PE=1 SV=1 - [I6L9G6_RAT]	308.348	25.61	1	7	9	14	1.05703	11	5.84797	1.07373	11	4.44743	1.00191	11	2.53945	1.01031	11	4.78882	0.972813	11	4.55171	1.00195	11	5.05873	0.938517	11	5.52816	0.969049	11	7.76936	1.02902	11	10.1244	285	32.1271	6.99072
Q6AXR6	Glutathione-dependent dehydroascorbate reductase OS=Rattus norvegicus OX=10116 GN=Gsto1 PE=1 SV=1 - [Q6AXR6_RAT]	308.145	29.46	6	8	8	15	0.885265	15	6.46351	0.899917	15	7.1047	1.05341	15	6.72709	1.04658	15	3.45748	1.03541	15	5.64419	1.03271	15	4.65943	1.03288	15	6.42384	1.04886	15	4.58479	0.920864	15	15.2611	241	27.665	7.00537
P17764	Acetyl-CoA acetyltransferase, mitochondrial OS=Rattus norvegicus OX=10116 GN=Acat1 PE=1 SV=1 - [THIL_RAT]	307.187	23.82	4	9	9	13	1.00522	13	6.09356	0.998502	13	9.02254	1.00957	13	3.29039	1.00581	13	1.78139	1.01417	13	9.74524	1.03024	13	7.8437	1.02349	13	12.3723	1.00678	13	7.49517	1.01214	13	12.1032	424	44.6664	8.76318
Q6DGG0	Peptidyl-prolyl cis-trans isomerase D OS=Rattus norvegicus OX=10116 GN=Ppid PE=1 SV=3 - [PPID_RAT]	307.034	28.38	4	10	12	17	0.904523	13	5.40572	0.904595	13	3.85703	1.04608	13	1.57617	1.05066	13	4.21616	1.01931	13	4.97587	1.03594	13	7.67698	1.01005	13	3.45805	1.00942	13	4.04749	0.941756	13	7.8313	370	40.7398	7.1665
G3V741	Phosphate carrier protein, mitochondrial OS=Rattus norvegicus OX=10116 GN=Slc25a3 PE=1 SV=1 - [G3V741_RAT]	306.241	23.31	6	11	12	36	0.92092	33	12.4471	0.888308	33	11.212	1.02523	33	4.16372	1.01626	33	4.32702	1.07767	33	6.22011	1.02166	33	7.16571	1.07243	33	5.47582	1.05907	33	8.38939	0.885961	33	7.42929	356	39.5054	9.26123
F1LQZ9	Microtubule-associated protein 6 OS=Rattus norvegicus OX=10116 GN=Map6 PE=1 SV=3 - [F1LQZ9_RAT]	305.919	16.91	2	6	6	15	0.79772	15	9.32606	0.801629	15	10.3767	1.08042	15	5.4269	1.04641	15	4.87935	1.1004	15	10.6161	1.03813	15	8.06163	1.07875	15	10.5753	1.08509	15	7.62562	0.818327	15	10.0479	952	100.377	9.37842
Q4KM74	Vesicle-trafficking protein SEC22b OS=Rattus norvegicus OX=10116 GN=Sec22b PE=1 SV=3 - [SC22B_RAT]	305.83	35.81	1	8	8	12	0.991394	12	1.2097	0.959206	12	10.5392	0.99272	12	6.63211	0.97236	12	7.3947	1.0142	12	5.16149	1.00763	12	7.72336	1.02146	12	8.11922	1.03359	12	4.83149	0.995811	12	7.77511	215	24.7248	8.51416
Q9Z0V5	Peroxiredoxin-4 OS=Rattus norvegicus OX=10116 GN=Prdx4 PE=2 SV=1 - [PRDX4_RAT]	305.49	22.34	1	2	4	11	0.986418	4	2.34302	1.0173	4	3.87539	1.03904	4	5.88147	0.973675	4	1.29725	0.957809	4	8.10595	1.01713	4	1.65779	1.00465	4	2.83834	0.970582	4	1.94111	1.10111	4	10.3375	273	30.9881	6.65381
Q63083	Nucleobindin-1 OS=Rattus norvegicus OX=10116 GN=Nucb1 PE=1 SV=1 - [NUCB1_RAT]	304.779	28.98	5	14	15	18	0.817269	17	14.5423	0.810174	17	6.68068	1.0614	17	5.20833	1.03972	17	4.59287	1.09966	17	6.28108	1.05866	17	6.68623	1.08744	17	6.7757	1.09977	17	3.73377	0.813582	17	14.5722	459	53.4739	5.12256
Q6P685	Eukaryotic translation initiation factor 2 subunit beta OS=Rattus norvegicus OX=10116 GN=Eif2s2 PE=1 SV=1 - [Q6P685_RAT]	304.426	25.53	1	7	7	12	0.956353	12	7.41447	0.945243	12	5.14902	1.02208	12	4.35855	1.06816	12	1.63851	0.975901	12	3.09077	1.05332	12	4.45315	0.976337	12	4.05077	0.989396	12	3.29721	0.957079	12	5.74921	333	38.2193	5.79541
Q5RJR8	Leucine-rich repeat-containing protein 59 OS=Rattus norvegicus OX=10116 GN=Lrrc59 PE=1 SV=1 - [LRC59_RAT]	304.216	28.34	2	11	11	19	0.982926	18	4.87313	1.0151	18	10.1725	1.01954	18	3.93633	1.00698	18	3.16394	0.981801	18	7.28736	1.00543	18	4.46735	1.01109	18	6.99038	0.973625	18	5.17875	0.988208	18	7.28085	307	34.8477	9.5249
B0BMT9	Sqrdl protein OS=Rattus norvegicus OX=10116 GN=Sqor PE=1 SV=1 - [B0BMT9_RAT]	303.71	19.11	2	7	7	11	0.795697	11	8.98609	0.786371	11	5.29766	1.07764	11	5.7326	1.10609	11	6.69642	1.01256	11	4.79728	1.14858	11	7.61907	1.03863	11	5.13622	1.06587	11	3.4668	0.789506	11	12.8346	450	50.1698	9.0708
Q4G079	Aminoacyl tRNA synthetase complex-interacting multifunctional protein 1 OS=Rattus norvegicus OX=10116 GN=Aimp1 PE=1 SV=1 - [Q4G079_RAT]	303.449	26.35	1	5	5	11	0.961101	11	10.2876	0.927814	11	9.19436	1.02113	11	7.90853	1.03047	11	6.96261	0.997961	11	10.8457	1.02724	11	9.67335	1.00794	11	6.82934	0.984851	11	4.976	1.00373	11	17.0833	315	34.552	8.29443
P04897	Guanine nucleotide-binding protein G(i) subunit alpha-2 OS=Rattus norvegicus OX=10116 GN=Gnai2 PE=1 SV=3 - [GNAI2_RAT]	303.364	26.2	14	7	10	15	1.13325	11	9.02715	1.11917	11	7.85682	0.997629	11	7.11828	1.01843	11	3.77645	0.895303	11	6.2986	1.02737	11	5.63375	0.877953	11	7.47571	0.875555	11	11.7726	1.10952	11	5.29701	355	40.4731	5.45264
Q32PW9	Psmc6 protein (Fragment) OS=Rattus norvegicus OX=10116 GN=Psmc6 PE=2 SV=1 - [Q32PW9_RAT]	303.233	18.9	14	7	8	14	0.961105	12	9.70282	0.957376	12	9.23403	1.0271	12	2.59579	1.03649	12	3.14913	1.01188	12	9.09551	1.02961	12	5.09288	0.989284	12	7.41373	0.988597	12	6.7463	0.966251	12	7.65463	381	43.2607	7.48877
P24049	60S ribosomal protein L17 OS=Rattus norvegicus OX=10116 GN=Rpl17 PE=2 SV=3 - [RL17_RAT]	303.02	38.59	13	7	8	17	0.967897	13	4.60855	1.00004	13	4.18269	0.972703	13	2.7735	1.03161	13	1.48298	1.01351	13	7.29895	1.04166	13	4.33783	0.970017	13	7.76678	0.982181	13	3.67722	1.01784	13	7.44772	184	21.3834	10.1841
D4ABT8	Heterogeneous nuclear ribonucleoprotein U-like 2 OS=Rattus norvegicus OX=10116 GN=Hnrnpul2 PE=1 SV=1 - [D4ABT8_RAT]	302.941	14.77	1	10	10	13	1.05273	13	19.7839	1.04772	13	8.49206	0.963129	13	2.52497	0.984818	13	2.10902	0.939329	13	6.65049	1.03833	13	4.08252	0.959579	13	9.7703	0.909647	13	16.0642	1.17606	13	14.7103	745	84.8069	4.90674
Q8CFN2	Cell division control protein 42 homolog OS=Rattus norvegicus OX=10116 GN=Cdc42 PE=1 SV=2 - [CDC42_RAT]	302.853	32.46	5	5	6	10	1.08871	8	13.4011	1.02492	8	9.62172	1.00122	8	5.61351	1.00412	8	5.03934	1.00526	8	6.44705	0.985995	8	1.90581	0.980237	8	7.19383	0.905302	8	12.1103	1.0574	8	12.6325	191	21.245	6.55127
P51583	Multifunctional protein ADE2 OS=Rattus norvegicus OX=10116 GN=Paics PE=1 SV=3 - [PUR6_RAT]	302.419	33.41	4	16	16	20	0.89628	18	8.86574	0.904903	18	7.87042	1.04983	18	5.22866	1.0627	18	5.78781	1.04531	18	3.01299	1.07063	18	7.54718	1.0242	18	6.88209	1.04265	18	6.67857	0.849209	18	10.0526	425	47.0661	7.69385
Q99MI5	Spermidine synthase OS=Rattus norvegicus OX=10116 GN=LOC100912604 PE=1 SV=1 - [Q99MI5_RAT]	302.161	18.54	1	5	5	8	0.850758	8	11.9452	0.867622	8	4.67506	1.00634	8	1.32662	1.07291	8	2.91839	1.0382	8	6.59824	1.09348	8	3.65959	1.04042	8	2.24731	1.04274	8	1.96996	0.891013	8	12.5149	302	33.9748	5.64307
P39069	Adenylate kinase isoenzyme 1 OS=Rattus norvegicus OX=10116 GN=Ak1 PE=1 SV=3 - [KAD1_RAT]	301.556	33.51	4	8	8	12	0.974076	12	7.15244	1.00813	12	6.00755	0.987765	12	5.78529	1.03826	12	4.97467	1.00044	12	6.492	1.04031	12	4.31587	0.981797	12	6.12127	0.993776	12	4.03058	1.00981	12	13.465	194	21.5702	7.89893
D3ZQM0	Splicing factor 3a, subunit 1 OS=Rattus norvegicus OX=10116 GN=Sf3a1 PE=1 SV=1 - [D3ZQM0_RAT]	301.336	8.34	38	5	6	10	1.01625	9	7.86949	1.02536	9	4.65093	0.98539	9	1.37	0.995454	9	5.8984	1.0049	9	2.9787	0.978142	9	4.95515	1.03881	9	4.12788	1.01452	9	2.82449	0.99531	9	8.68899	791	88.5324	5.22412
Q9ES21	Phosphatidylinositol-3-phosphatase SAC1 OS=Rattus norvegicus OX=10116 GN=Sacm1l PE=1 SV=1 - [SAC1_RAT]	301.331	14.31	1	8	8	13	0.852302	13	6.40722	0.873792	13	4.60663	1.04544	13	4.36971	1.09473	13	4.67498	1.04311	13	2.9812	1.07274	13	3.83703	1.02604	13	4.67547	1.02736	13	2.56998	0.881677	13	9.39344	587	66.996	7.28369
A3FM27	Chloride intracellular channel protein OS=Rattus norvegicus OX=10116 GN=Clic4 PE=2 SV=1 - [A3FM27_RAT]	300.022	29.25	10	6	7	17	0.942037	14	5.44208	0.957985	14	6.61385	0.989903	14	7.92423	1.00486	14	5.48284	1.04709	14	6.51923	1.02181	14	2.97141	1.0459	14	7.05204	1.01947	14	8.83394	1.00968	14	8.13401	253	28.6186	5.59229
P63004	Platelet-activating factor acetylhydrolase IB subunit alpha OS=Rattus norvegicus OX=10116 GN=Pafah1b1 PE=1 SV=2 - [LIS1_RAT]	299.766	25.85	2	8	8	13	0.943979	13	6.55185	0.969839	13	6.13953	1.0333	13	3.75453	1.04709	13	4.41619	0.9925	13	9.21101	1.05155	13	2.50484	0.994038	13	2.8494	0.982924	13	4.29573	0.974832	13	5.12284	410	46.6401	7.37158
A0A0G2KAZ7	Heterogeneous nuclear ribonucleoprotein D-like OS=Rattus norvegicus OX=10116 GN=Hnrnpdl PE=1 SV=1 - [A0A0G2KAZ7_RAT]	297.411	13.13	2	4	5	8	1.09616	6	9.43339	1.07662	6	10.2324	0.957315	6	1.12589	0.983339	6	4.27175	0.946469	6	4.75913	0.959169	6	4.20406	0.959577	6	7.01705	0.954266	6	7.07832	1.13885	6	10.4233	419	46.279	9.5249
A0A140TAB4	Core histone macro-H2A OS=Rattus norvegicus OX=10116 GN=H2afy PE=1 SV=1 - [A0A140TAB4_RAT]	297.285	11.96	2	3	3	7	1.03696	7	3.28006	1.02382	7	3.00277	0.978079	7	1.43852	1.02381	7	1.91953	0.985976	7	4.84878	1.03692	7	2.96388	0.95618	7	9.24244	0.962411	7	5.83571	1.06871	7	6.76059	368	39.0461	9.81787
G3V940	Coronin OS=Rattus norvegicus OX=10116 GN=Coro1b PE=1 SV=1 - [G3V940_RAT]	297.215	16.94	6	6	8	10	0.988977	8	9.58086	0.999842	8	5.87082	1.01269	8	3.06463	1.0217	8	4.34366	1.00412	8	3.25045	1.01335	8	5.18878	1.00967	8	12.4768	1.04507	8	6.16365	0.994529	8	6.2483	484	53.904	5.77002
Q5U2Z3	Nucleosome assembly protein 1-like 4 OS=Rattus norvegicus OX=10116 GN=Nap1l4 PE=1 SV=1 - [NP1L4_RAT]	296.858	15.03	2	5	6	12	0.996842	8	9.25945	0.975393	8	8.04738	1.02371	8	4.89743	1.00725	8	2.03337	1.04222	8	3.67909	0.997387	8	3.42717	0.998744	8	4.63692	0.99392	8	5.27616	0.914754	8	5.07307	386	43.8895	4.67822
M0RA08	Perilipin OS=Rattus norvegicus OX=10116 GN=Plin3 PE=1 SV=1 - [M0RA08_RAT]	296.179	17.35	1	8	8	10	0.961632	10	10.5106	0.881632	10	8.85445	1.03032	10	5.37735	1.01046	10	6.03657	1.05288	10	5.29823	0.997815	10	4.19394	1.05675	10	4.48353	1.06282	10	5.79825	0.869302	10	8.34815	438	47.3139	5.71924
P52925	High mobility group protein B2 OS=Rattus norvegicus OX=10116 GN=Hmgb2 PE=2 SV=2 - [HMGB2_RAT]	295.863	58.1	3	1	17	36	1.20263	6	19.0124	1.2545	6	22.4442	0.999168	6	12.9424	0.997825	6	7.23788	0.860801	6	7.60491	0.971448	6	2.52327	0.825088	6	11.0905	0.805754	6	14.8742	1.1784	6	17.7718	210	24.1438	7.38623
D3ZLC1	Lamin B2 OS=Rattus norvegicus OX=10116 GN=Lmnb2 PE=1 SV=2 - [D3ZLC1_RAT]	295.026	25.49	1	11	18	24	1.11507	11	8.28548	1.09405	11	3.21335	0.961495	11	3.12692	0.977606	11	4.36679	0.96875	11	8.22908	0.970617	11	1.92442	0.935441	11	7.38947	0.980157	11	3.11174	1.09991	11	7.1168	616	68.8089	5.26221
M0R3R6	RNA-binding motif protein 14 OS=Rattus norvegicus OX=10116 GN=Rbm14 PE=1 SV=2 - [M0R3R6_RAT]	294.854	8.99	2	5	5	10	1.03763	10	7.10148	1.04617	10	4.192	0.955643	10	2.11335	1.01822	10	3.76362	0.966755	10	2.56022	1.00689	10	2.86938	0.992528	10	4.94989	0.983904	10	4.35005	1.05122	10	5.92859	601	61.358	9.59814
Q5XIC6	Proteasome (Prosome, macropain) 26S subunit, non-ATPase, 12 OS=Rattus norvegicus OX=10116 GN=Psmd12 PE=1 SV=1 - [Q5XIC6_RAT]	294.83	21.93	2	9	10	19	0.995013	16	6.84538	0.985454	16	5.77201	1.02364	16	3.76467	1.00832	16	5.97122	1.00613	16	5.12579	1.03384	16	2.7919	1.01285	16	6.53643	0.981149	16	9.00104	0.960897	16	5.4658	456	52.9025	7.35693
P09527	Ras-related protein Rab-7a OS=Rattus norvegicus OX=10116 GN=Rab7a PE=1 SV=2 - [RAB7A_RAT]	293.782	45.41	2	8	9	14	1.05324	12	4.08783	1.04493	12	3.52427	0.983046	12	1.85891	0.996364	12	5.21885	0.974944	12	4.20945	1.0178	12	5.57878	0.97628	12	8.17307	0.967063	12	3.75165	1.00516	12	9.15969	207	23.4889	6.69775
Q1RP74	RCG53953, isoform CRA_a OS=Rattus norvegicus OX=10116 GN=LOC103690005 PE=1 SV=1 - [Q1RP74_RAT]	293.033	33.2	2	7	7	9	1.03383	9	7.72081	1.00492	9	5.09413	1.00092	9	5.42614	1.01358	9	4.87143	0.99868	9	2.05097	0.999435	9	4.13295	0.983862	9	3.24354	0.96628	9	7.93698	1.01082	9	3.25421	244	27.2303	4.99561
P21531	60S ribosomal protein L3 OS=Rattus norvegicus OX=10116 GN=Rpl3 PE=1 SV=3 - [RL3_RAT]	292.394	28.29	13	12	14	27	0.961276	25	8.8284	0.971062	25	8.11161	1.00954	25	5.39808	1.01538	25	7.68311	1.0167	25	10.4078	0.981284	25	5.74185	1.01441	25	10.3872	1.01286	25	9.19277	0.995439	25	9.8862	403	46.1068	10.2134
Q5XIP6	Flap endonuclease 1 OS=Rattus norvegicus OX=10116 GN=Fen1 PE=2 SV=1 - [FEN1_RAT]	292.124	18.42	4	8	8	13	1.08092	13	10.1716	1.06916	13	7.25391	0.968999	13	5.29951	0.977186	13	4.67642	0.981256	13	5.54728	0.962899	13	3.37564	0.966368	13	9.98932	0.964865	13	3.99773	1.09372	13	11.8384	380	42.5821	8.48486
D3ZUY8	AP-2 complex subunit alpha OS=Rattus norvegicus OX=10116 GN=Ap2a1 PE=1 SV=1 - [D3ZUY8_RAT]	291.838	10.85	1	6	11	16	1.04379	9	6.10442	1.06934	9	9.12068	0.98296	9	1.69245	0.999481	9	2.72124	0.994511	9	3.27771	0.996902	9	3.55364	0.949163	9	7.08221	0.995533	9	3.89742	1.06679	9	2.08927	977	107.607	7.06396
Q80U96	Exportin-1 OS=Rattus norvegicus OX=10116 GN=Xpo1 PE=1 SV=1 - [XPO1_RAT]	291.677	11.58	2	12	13	17	0.970776	15	4.50984	0.954897	15	2.96424	1.00743	15	2.60467	1.01955	15	2.99061	1.01321	15	6.63833	1.01848	15	3.93956	1.02089	15	4.60259	1.00859	15	4.12852	0.955671	15	7.08146	1071	122.959	6.07471
Q5M827	Pirin OS=Rattus norvegicus OX=10116 GN=Pir PE=1 SV=1 - [PIR_RAT]	289.678	25.43	1	9	9	16	0.938242	16	8.52047	0.965717	16	9.96635	1.0326	16	5.24604	1.04913	16	6.41332	1.01653	16	5.61029	1.02307	16	6.71309	1.01292	16	9.96841	1.0263	16	4.73339	0.923087	16	10.2381	291	32.1583	6.69775
Q5U2U8	BAG cochaperone 3 OS=Rattus norvegicus OX=10116 GN=Bag3 PE=1 SV=1 - [Q5U2U8_RAT]	289.623	32.75	3	5	15	29	0.931025	15	7.14347	0.946731	15	5.64154	0.979236	15	5.20287	0.9825	15	4.00177	1.08618	15	4.59067	1.00936	15	3.98111	1.04906	15	6.77335	1.04118	15	5.06046	0.9604	15	10.186	574	61.453	7.03467
Q4V8H8	EH domain-containing protein 2 OS=Rattus norvegicus OX=10116 GN=Ehd2 PE=1 SV=1 - [EHD2_RAT]	288.618	15.47	6	6	9	11	1.23639	7	5.30083	1.2332	7	6.66568	0.924078	7	1.79437	0.922032	7	3.64271	0.905368	7	7.14624	0.903534	7	6.56403	0.891176	7	6.15808	0.92656	7	8.39755	1.19851	7	3.48913	543	61.1988	6.55127
P34064	Proteasome subunit alpha type-5 OS=Rattus norvegicus OX=10116 GN=Psma5 PE=1 SV=1 - [PSA5_RAT]	288.112	31.95	2	5	5	9	0.991377	9	9.77677	0.988901	9	7.09538	0.995782	9	6.23152	1.03045	9	3.29148	0.996494	9	4.22424	1.03436	9	7.42349	0.932504	9	18.52	0.999409	9	9.85517	1.06854	9	15.6587	241	26.3742	4.85596
B5DEH2	Erlin-2 OS=Rattus norvegicus OX=10116 GN=Erlin2 PE=1 SV=1 - [ERLN2_RAT]	287.992	21.53	1	4	7	9	0.969565	5	10.7882	0.907907	5	13.9209	1.05506	5	5.53992	1.02911	5	2.97061	0.959397	5	7.79827	1.01287	5	3.21475	1.02843	5	11.4935	0.989033	5	14.2029	0.987355	5	13.9299	339	37.6864	5.74463
P62083	40S ribosomal protein S7 OS=Rattus norvegicus OX=10116 GN=Rps7 PE=1 SV=1 - [RS7_RAT]	285.811	27.84	2	6	7	18	0.964098	17	9.28131	0.964494	17	6.56995	1.03052	17	7.73544	1.04549	17	6.95004	1.01801	17	4.76058	1.02581	17	11.5259	0.97241	17	10.8477	0.979363	17	6.51814	0.966263	17	13.3588	194	22.1133	10.0962
Q6P9U0	Serine (Or cysteine) peptidase inhibitor, clade B, member 6a OS=Rattus norvegicus OX=10116 GN=Serpinb6a PE=1 SV=1 - [Q6P9U0_RAT]	285.715	27.97	5	9	10	17	0.832868	16	5.53144	0.847987	16	7.6181	1.08118	16	4.70719	1.08663	16	3.39812	1.07533	16	4.36964	1.07489	16	5.14193	1.0282	16	5.57462	1.06398	16	5.14089	0.813343	16	9.34977	379	42.9909	6.1001
Q9Z1E1	Flotillin-1 OS=Rattus norvegicus OX=10116 GN=Flot1 PE=2 SV=2 - [FLOT1_RAT]	282.841	18.93	4	8	8	11	1.07855	11	3.82017	1.06796	11	10.6096	0.982377	11	2.71567	0.972861	11	2.31127	0.973897	11	5.89753	0.982137	11	4.69921	0.980527	11	2.35075	0.954681	11	8.53484	1.06939	11	9.02276	428	47.4696	7.15186
Q6IFW6	Keratin, type I cytoskeletal 10 OS=Rattus norvegicus OX=10116 GN=Krt10 PE=3 SV=1 - [K1C10_RAT]	282.571	10.65	4	7	7	12	1.04504	12	6.10413	1.04049	12	7.71659	0.776292	12	18.5208	0.725907	12	17.5781	1.35299	12	13.9649	0.726911	12	13.7697	1.33291	12	11.6165	1.32637	12	14.9919	0.950031	12	9.88282	526	56.4705	5.14795
G3V8G2	26S proteasome non-ATPase regulatory subunit 5 OS=Rattus norvegicus OX=10116 GN=Psmd5 PE=1 SV=1 - [G3V8G2_RAT]	282.204	16.67	2	7	7	9	1.01965	9	4.22489	1.01137	9	6.24477	0.996193	9	2.55447	1.02725	9	4.95833	1.00411	9	7.12902	1.02025	9	3.22621	1.01193	9	3.90282	0.980722	9	8.5442	0.985025	9	7.81705	504	55.8179	5.2749
B5DFB2	RB-binding protein 4, chromatin-remodeling factor OS=Rattus norvegicus OX=10116 GN=Rbbp4 PE=1 SV=1 - [B5DFB2_RAT]	282.193	22.12	3	3	9	15	1.1628	4	15.6536	1.1509	4	21.2446	0.953059	4	11.7091	0.943997	4	2.40763	0.930034	4	14.6931	0.948248	4	1.02919	0.913896	4	12.3043	0.912242	4	5.26466	1.18857	4	19.2059	425	47.6261	4.89404
A0A0A0MY48	Dynamin GTPase OS=Rattus norvegicus OX=10116 GN=Dnm2 PE=1 SV=2 - [A0A0A0MY48_RAT]	281.226	15.47	15	5	13	14	1.0304	5	5.4251	1.00065	5	0.993577	0.952544	5	1.14247	0.991628	5	3.69955	0.994876	5	3.36302	1.02241	5	6.45797	0.979752	5	6.69451	0.994208	5	1.36073	1.0311	5	4.18742	860	97.1935	7.62061
Q3B8Q2	Eukaryotic initiation factor 4A-III OS=Rattus norvegicus OX=10116 GN=Eif4a3 PE=1 SV=1 - [IF4A3_RAT]	280.89	20.92	1	6	9	19	1.01692	9	11.8755	1.01746	9	12.548	1.01519	9	4.78426	0.978022	9	2.40569	1.01697	9	3.12647	0.974864	9	4.1605	1.04128	9	7.45138	0.999497	9	7.01939	1.06836	9	8.39166	411	46.8112	6.72705
Q6J0M8	p100 LMO7 variant protein OS=Rattus norvegicus OX=10116 PE=2 SV=1 - [Q6J0M8_RAT]	280.678	14.78	3	1	9	12	1.01975	1		0.980867	1		1.01964	1		0.895043	1		1.18224	1		0.74865	1		1.26158	1		1.22057	1		0.745909	1		670	74.3924	5.96045
F7EPH4	Inorganic diphosphatase OS=Rattus norvegicus OX=10116 GN=Ppa1 PE=1 SV=1 - [F7EPH4_RAT]	280.24	35.29	4	8	8	13	0.981038	12	6.2295	0.974511	12	3.79223	0.989961	12	2.96065	1.0289	12	2.74867	0.995315	12	6.15504	1.03944	12	3.70942	0.978305	12	4.33072	1.00301	12	2.56494	1.0049	12	7.58413	289	32.7501	5.46533
O70593	Small glutamine-rich tetratricopeptide repeat-containing protein alpha OS=Rattus norvegicus OX=10116 GN=Sgta PE=1 SV=1 - [SGTA_RAT]	279.673	28.34	1	8	8	11	1.03443	11	6.77999	1.00853	11	1.67372	1.00475	11	6.9	0.996509	11	8.74394	0.961504	11	7.23253	1.02196	11	4.88442	0.974903	11	10.6419	0.963478	11	10.8125	1.07115	11	10.3313	314	34.1359	5.12256
P35280	Ras-related protein Rab-8A OS=Rattus norvegicus OX=10116 GN=Rab8a PE=1 SV=2 - [RAB8A_RAT]	278.314	23.67	16	2	5	11	1.02997	1		1.09306	1		0.979877	1		0.939427	1		0.876751	1		0.973376	1		0.896879	1		0.927374	1		1.43526	1		207	23.6532	9.0708
Q71UF4	Histone-binding protein RBBP7 OS=Rattus norvegicus OX=10116 GN=Rbbp7 PE=2 SV=1 - [RBBP7_RAT]	278.24	25.18	1	5	10	14	1.10017	7	13.8591	1.13471	7	9.80888	0.96937	7	4.42572	0.97343	7	6.18382	0.947166	7	6.71517	0.959091	7	5.3095	0.95461	7	8.73772	0.961602	7	11.8477	1.17575	7	12.5556	425	47.7902	5.04639
F1LQP9	Transportin 1 OS=Rattus norvegicus OX=10116 GN=Tnpo1 PE=1 SV=3 - [F1LQP9_RAT]	278.013	8.88	4	7	7	9	0.983096	9	5.71323	0.967719	9	8.20853	1.02991	9	4.21972	1.00494	9	4.32716	1.05002	9	3.33346	0.972862	9	6.81467	1.01749	9	4.42628	1.03734	9	2.59325	0.937358	9	5.33593	890	101.202	4.95752
F1M3H8	Hypothetical protein LOC681410 OS=Rattus norvegicus OX=10116 GN=LOC681410 PE=1 SV=3 - [F1M3H8_RAT]	277.067	16.61	1	3	5	13	1.1202	3	0.935305	1.12503	3	1.96248	0.898324	3	3.36373	0.990982	3	5.01585	1.00139	3	2.81705	0.964143	3	0.46441	0.9455	3	5.79041	0.995926	3	4.32763	1.00786	3	0.280335	301	30.0575	9.31982
Q5RK09	Eukaryotic translation initiation factor 3 subunit G OS=Rattus norvegicus OX=10116 GN=Eif3g PE=1 SV=1 - [EIF3G_RAT]	276.936	24.06	1	10	10	12	0.967265	12	6.21731	0.967276	12	3.47748	0.998323	12	2.5619	1.01575	12	4.97555	1.00296	12	4.91569	1.03026	12	3.22736	1.02185	12	7.6635	1.00343	12	7.06155	0.974956	12	8.2878	320	35.6289	5.89697
P63036	DnaJ homolog subfamily A member 1 OS=Rattus norvegicus OX=10116 GN=Dnaja1 PE=1 SV=1 - [DNJA1_RAT]	276.836	17.38	3	7	7	13	1.11087	12	5.61442	1.12266	12	4.82352	0.947473	12	3.3099	0.974488	12	3.01601	0.95169	12	5.02152	0.977411	12	2.77654	0.954489	12	4.50933	0.961274	12	5.99005	1.12624	12	4.07106	397	44.8395	7.07861
A0A0G2K4T9	Spectrin repeat-containing, nuclear envelope family member 3 OS=Rattus norvegicus OX=10116 GN=Syne3 PE=4 SV=1 - [A0A0G2K4T9_RAT]	276.62	6.56	2	5	5	6	1.06732	6	6.19937	1.06606	6	2.01286	0.977172	6	6.91305	0.967807	6	1.193	0.952736	6	7.87047	0.994091	6	4.61656	0.976311	6	4.5053	0.990798	6	2.25261	1.06139	6	14.8136	823	94.3301	5.75732
P62775	Myotrophin OS=Rattus norvegicus OX=10116 GN=Mtpn PE=1 SV=2 - [MTPN_RAT]	276.201	42.37	16	4	5	10	1.04678	8	6.27939	1.06212	8	4.18552	0.96303	8	4.19959	0.987561	8	2.38626	0.991472	8	6.05392	0.980428	8	2.07244	0.960268	8	7.76249	0.955412	8	6.19161	1.11262	8	4.25979	118	12.8526	5.51611
P62282	40S ribosomal protein S11 OS=Rattus norvegicus OX=10116 GN=Rps11 PE=1 SV=3 - [RS11_RAT]	273.874	48.73	10	1	10	21	1.09241	4	2.68238	1.15049	4	1.45297	1.00292	4	2.56481	1.0448	4	2.96098	0.876545	4	4.73918	1.02884	4	3.18296	0.859746	4	3.13765	0.871832	4	7.85925	1.13076	4	4.95514	158	18.419	10.3013
Q5XI04	RCG45489, isoform CRA_a OS=Rattus norvegicus OX=10116 GN=Stom PE=1 SV=1 - [Q5XI04_RAT]	273.693	20.07	1	4	4	8	1.10381	8	13.1864	1.20854	8	12.6765	0.92208	8	4.9303	0.971649	8	6.15675	0.958314	8	7.25427	0.928132	8	4.02038	0.929333	8	5.35025	0.949266	8	8.16718	1.16191	8	11.9935	284	31.3585	7.03467
P61203	COP9 signalosome complex subunit 2 OS=Rattus norvegicus OX=10116 GN=Cops2 PE=1 SV=1 - [CSN2_RAT]	273.61	7.67	1	3	3	5	0.979923	5	14.9099	0.872205	5	10.4461	1.07375	5	6.50993	1.02157	5	3.44314	1.00871	5	6.73638	0.986769	5	1.13626	1.09065	5	5.90261	1.08319	5	1.90926	0.905587	5	11.2035	443	51.5641	5.52881
P12075	Cytochrome c oxidase subunit 5B, mitochondrial OS=Rattus norvegicus OX=10116 GN=Cox5b PE=1 SV=2 - [COX5B_RAT]	273.498	28.68	2	4	4	13	0.924149	13	3.06456	0.957911	13	5.54494	1.02277	13	3.51043	1.03518	13	4.41332	0.999165	13	4.81131	1.04447	13	5.96172	1.0141	13	4.81026	0.994901	13	3.32659	0.974805	13	6.30609	129	13.9059	7.78174
Q6PDV9	Ribosomal protein S11 OS=Rattus norvegicus OX=10116 GN=Rps11 PE=2 SV=1 - [Q6PDV9_RAT]	272.76	46.2	10	1	10	19	1.09545	2	8.04901	1.04674	2	2.25426	1.00227	2	0.164884	1.05613	2	1.6762	0.892823	2	0.841647	1.07457	2	0.743243	0.913147	2	1.92582	0.928553	2	5.50494	1.0169	2	2.26687	158	18.435	10.3013
A0A0G2JZF2	CAP-Gly domain-containing linker protein 2 OS=Rattus norvegicus OX=10116 GN=Clip2 PE=1 SV=1 - [A0A0G2JZF2_RAT]	272.37	9.37	5	4	7	9	0.934486	6	9.58621	0.949484	6	10.4322	1.04638	6	1.60587	0.978296	6	2.53399	1.0752	6	5.65259	0.987639	6	1.95344	1.06143	6	7.92765	1.058	6	2.887	0.907218	6	2.73946	1046	115.462	6.45557
D3ZD73	RNA helicase OS=Rattus norvegicus OX=10116 GN=Ddx6 PE=1 SV=1 - [D3ZD73_RAT]	271.761	23.81	1	8	8	10	1.04066	10	7.41003	1.03353	10	8.06525	0.96977	10	7.98004	0.98604	10	1.83978	0.990864	10	2.39871	0.969572	10	5.41504	0.98001	10	4.36616	1.00109	10	1.67472	1.03289	10	4.181	483	54.2102	8.66064
Q5U316	Ras-related protein Rab-35 OS=Rattus norvegicus OX=10116 GN=Rab35 PE=1 SV=1 - [RAB35_RAT]	270.735	20.9	14	1	4	9	1.04683	1		1.056	1		0.997661	1		1.00823	1		0.922882	1		0.996238	1		0.980025	1		1.01389	1		1.03407	1		201	23.0108	8.29443
P62718	60S ribosomal protein L18a OS=Rattus norvegicus OX=10116 GN=Rpl18a PE=2 SV=1 - [RL18A_RAT]	270.658	40.91	2	9	9	17	0.989761	17	3.66356	1.00494	17	4.65813	1.01435	17	3.74853	1.01474	17	2.63325	0.982935	17	7.25088	1.03437	17	5.56962	0.984605	17	6.03696	0.989229	17	9.00327	0.974607	17	7.52899	176	20.7189	10.7114
P42123	L-lactate dehydrogenase B chain OS=Rattus norvegicus OX=10116 GN=Ldhb PE=1 SV=2 - [LDHB_RAT]	269.439	25.15	2	6	10	15	1.07349	7	4.70378	1.06723	7	13.2303	0.958771	7	3.15325	0.984895	7	1.42797	0.991062	7	3.88552	0.967478	7	2.65832	0.988431	7	8.1308	1.00771	7	7.50342	1.07089	7	15.8584	334	36.5891	6.04932
P62278	40S ribosomal protein S13 OS=Rattus norvegicus OX=10116 GN=Rps13 PE=1 SV=2 - [RS13_RAT]	268.74	36.42	4	8	8	24	0.967632	24	7.33402	0.991969	24	6.51333	1.03906	24	5.01164	1.03066	24	4.14878	0.978203	24	12.8323	1.03215	24	6.21142	0.980654	24	8.25705	0.997947	24	6.15643	0.952832	24	5.98552	151	17.2117	10.5356
A0A0G2JUT1	Cell adhesion molecule 1 OS=Rattus norvegicus OX=10116 GN=Cadm1 PE=1 SV=1 - [A0A0G2JUT1_RAT]	268.636	20	3	4	4	5	1.19867	5	8.98659	1.19634	5	5.51832	0.929512	5	9.86959	0.96833	5	4.62202	0.91893	5	1.6113	0.940729	5	1.07753	0.93618	5	5.05661	0.931476	5	6.31342	1.24253	5	6.63917	385	42.8052	4.98291
D4A2D7	Importin 4 OS=Rattus norvegicus OX=10116 GN=Ipo4 PE=1 SV=2 - [D4A2D7_RAT]	268.414	6.11	1	5	5	7	0.882409	7	7.4222	0.867432	7	4.04776	1.05873	7	2.95198	1.06049	7	1.91599	1.04944	7	3.04803	1.02044	7	2.89373	1.08925	7	2.75799	1.04931	7	2.9508	0.830001	7	13.7875	1081	118.85	5.021
A0A0G2QC06	Signal recognition particle receptor subunit beta OS=Rattus norvegicus OX=10116 GN=Tf PE=1 SV=1 - [A0A0G2QC06_RAT]	268.195	9.3	5	6	7	9	1.09328	8	6.5342	1.08754	8	5.46341	0.990929	8	4.38894	0.994722	8	3.0909	0.962372	8	5.08101	0.954802	8	2.20447	0.978059	8	4.61787	0.977888	8	2.86072	1.06808	8	12.6883	979	107.34	8.04541
Q5FVQ4	Malectin OS=Rattus norvegicus OX=10116 GN=Mlec PE=2 SV=1 - [MLEC_RAT]	267.637	21.65	2	7	7	11	1.04197	11	6.02165	1.09332	11	12.9555	0.954276	11	3.74833	1.00686	11	5.61449	0.933813	11	11.6259	1.02432	11	4.63589	0.935901	11	7.10907	0.965966	11	11.3691	1.06436	11	11.5617	291	32.3978	5.5542
D4AE68	Guanine nucleotide binding protein, alpha q polypeptide, isoform CRA_a OS=Rattus norvegicus OX=10116 GN=Gnaq PE=1 SV=2 - [D4AE68_RAT]	267.553	16.43	6	2	6	10	1.09897	4	5.12103	1.05932	4	1.14237	0.966307	4	1.8242	1.0064	4	1.19568	0.957127	4	4.34757	1.0296	4	4.48394	0.94321	4	5.33482	0.967605	4	1.15852	1.04415	4	4.05578	359	42.1313	5.68115
G3V7I0	Peroxiredoxin 3 OS=Rattus norvegicus OX=10116 GN=Prdx3 PE=1 SV=1 - [G3V7I0_RAT]	267.549	19.07	2	3	3	7	0.788594	7	5.57821	0.818474	7	1.10484	1.06544	7	0.971412	1.12002	7	8.77142	1.04875	7	12.8311	1.1211	7	17.2595	1.0237	7	11.6537	1.02104	7	6.73265	0.913147	7	7.84041	257	28.2815	7.54736
Q66HA7	Core-binding factor subunit beta OS=Rattus norvegicus OX=10116 GN=Cbfb PE=1 SV=1 - [Q66HA7_RAT]	266.56	24.73	1	4	4	7	1.04302	7	8.0389	1.00794	7	7.44639	1.01204	7	1.62186	1.00489	7	0.928136	1.00068	7	7.53393	0.971162	7	3.65282	0.984622	7	6.10834	1.00209	7	5.10774	1.01244	7	6.02494	182	21.5037	6.80029
P38062	Methionine aminopeptidase 2 OS=Rattus norvegicus OX=10116 GN=Metap2 PE=1 SV=2 - [MAP2_RAT]	266.299	12.55	4	5	5	13	1.02754	13	8.04768	1.04633	13	9.07379	1.00559	13	4.14819	1.01432	13	1.77728	0.976396	13	2.31278	1.00476	13	8.41907	0.995164	13	8.61648	0.967106	13	4.9475	1.04431	13	13.8574	478	53.0183	6.02393
Q9ER24	Ataxin-10 OS=Rattus norvegicus OX=10116 GN=Atxn10 PE=1 SV=1 - [ATX10_RAT]	265.159	24.21	1	11	11	14	1.09116	14	5.06331	1.08218	14	7.78887	0.961014	14	3.25662	0.971399	14	4.00642	0.989802	14	5.37478	0.97981	14	5.87751	0.96494	14	6.52223	0.986904	14	5.43367	1.08577	14	10.6174	475	53.6925	5.14795
Q63570	26S proteasome regulatory subunit 6B OS=Rattus norvegicus OX=10116 GN=Psmc4 PE=1 SV=1 - [PRS6B_RAT]	264.695	20.1	1	8	9	14	0.947143	13	3.57982	0.981576	13	8.48511	1.01245	13	3.18063	1.02157	13	6.68478	1.02128	13	12.1823	1.02887	13	3.13578	1.04433	13	8.54003	1.01593	13	3.72936	0.933237	13	11.2076	418	47.3786	5.21143
Q63507	60S ribosomal protein L14 OS=Rattus norvegicus OX=10116 GN=Rpl14 PE=1 SV=3 - [RL14_RAT]	264.676	54.67	7	16	19	47	1.00647	35	6.09363	0.992319	35	7.93061	1.00227	35	4.5813	1.00747	35	4.65408	0.980019	35	8.40265	1.01735	35	6.37263	0.975398	35	6.37746	0.989785	35	8.2748	1.02542	35	5.12957	214	23.3241	11.1069
B2RZ72	Actin-related protein 2/3 complex subunit 4 OS=Rattus norvegicus OX=10116 GN=Arpc4 PE=1 SV=1 - [B2RZ72_RAT]	264.614	30.36	1	6	6	13	1.04635	13	4.19274	1.02812	13	6.49004	0.982071	13	1.99438	1.00722	13	3.57096	0.997652	13	2.60667	1.02859	13	4.00986	0.982739	13	3.971	0.987294	13	3.09277	0.979528	13	6.55868	168	19.6543	8.42627
Q64303	Serine/threonine-protein kinase PAK 2 OS=Rattus norvegicus OX=10116 GN=Pak2 PE=1 SV=1 - [PAK2_RAT]	264.602	17.75	1	4	7	9	1.03154	4	3.33556	1.08258	4	8.68533	0.963765	4	0.969469	0.995693	4	4.67467	0.957856	4	2.94747	0.989053	4	6.76253	0.993502	4	1.08563	0.971199	4	3.48326	1.08239	4	13.1945	524	57.9238	5.77002
B1WBY7	ER lipid raft-associated 1 OS=Rattus norvegicus OX=10116 GN=Erlin1 PE=1 SV=1 - [B1WBY7_RAT]	264.577	26.44	1	6	11	15	0.945708	7	3.03539	0.942001	7	3.17011	1.03233	7	2.15023	1.01788	7	1.71601	1.01121	7	5.40496	1.03515	7	3.79038	1.03479	7	8.5498	1.04003	7	5.07884	0.906896	7	5.50182	348	39.2413	7.00537
Q3T1K5	F-actin-capping protein subunit alpha-2 OS=Rattus norvegicus OX=10116 GN=Capza2 PE=1 SV=1 - [CAZA2_RAT]	263.036	26.57	1	3	6	9	1.00983	5	6.13829	0.997703	5	3.55514	0.964348	5	1.57354	1.01925	5	2.688	0.902305	5	7.52099	1.03587	5	11.1112	0.915315	5	8.50234	0.967643	5	4.93019	1.18208	5	3.10152	286	32.9466	5.84619
Q5XHX3	ENAH, actin regulator OS=Rattus norvegicus OX=10116 GN=Enah PE=1 SV=1 - [Q5XHX3_RAT]	262.995	22.62	4	11	11	17	0.992436	17	7.29962	0.983135	17	8.35032	1.01013	17	5.67719	1.04145	17	5.05963	0.993532	17	9.61347	1.05861	17	3.56248	0.979926	17	6.92609	0.947623	17	6.00629	1.00398	17	11.9924	526	58.792	8.00146
D3ZW55	Inosine triphosphate pyrophosphatase OS=Rattus norvegicus OX=10116 GN=Itpa PE=3 SV=1 - [ITPA_RAT]	262.413	20.2	1	3	3	5	0.983672	5	12.4679	0.965174	5	11.4517	0.978124	5	2.00817	1.00914	5	0.86963	0.985852	5	3.8951	1.04197	5	4.16172	0.959931	5	10.2349	1.00681	5	6.70883	1.06815	5	10.2414	198	21.9131	5.65576
Q68FX3	RNA helicase OS=Rattus norvegicus OX=10116 GN=Ddx19a PE=1 SV=1 - [Q68FX3_RAT]	261.983	16.53	9	9	10	12	0.98869	11	5.33496	1.02312	11	6.04727	0.994203	11	3.76034	1.01139	11	3.88559	0.966486	11	3.97688	1.03311	11	7.79273	0.991145	11	6.46028	1.01352	11	5.18947	0.986104	11	6.34914	478	53.8698	6.7417
Q9JJW3	ATP synthase membrane subunit DAPIT, mitochondrial OS=Rattus norvegicus OX=10116 GN=Atp5md PE=1 SV=1 - [ATPMD_RAT]	260.655	36.21	1	2	2	6	0.894246	6	4.02802	0.930836	6	6.05551	1.02698	6	3.30861	1.0342	6	0.745462	1.01111	6	3.69744	1.06096	6	5.08599	1.05003	6	3.44711	1.00822	6	0.997453	0.952196	6	12.4976	58	6.40337	9.83252
P63086	Mitogen-activated protein kinase 1 OS=Rattus norvegicus OX=10116 GN=Mapk1 PE=1 SV=3 - [MK01_RAT]	259.003	24.86	15	5	8	17	1.03522	9	5.68091	0.983305	9	7.76599	0.990991	9	3.50724	1.03611	9	3.09006	0.975994	9	5.25412	0.999947	9	1.89571	0.998268	9	9.45315	0.971077	9	6.75654	1.00195	9	7.87324	358	41.2492	6.97607
Q91Y81	Septin-2 OS=Rattus norvegicus OX=10116 GN=Septin2 PE=1 SV=1 - [SEPT2_RAT]	258.511	26.04	8	7	8	12	1.07764	11	12.9292	1.09827	11	11.9781	0.990133	11	6.72516	0.985603	11	2.70515	0.946014	11	6.4154	1.0115	11	6.06736	0.970518	11	10.6455	0.900967	11	11.0186	1.11949	11	7.22072	361	41.5663	6.59521
O54975	Xaa-Pro aminopeptidase 1 OS=Rattus norvegicus OX=10116 GN=Xpnpep1 PE=1 SV=1 - [XPP1_RAT]	258.026	14.13	2	9	9	10	0.949061	10	9.09338	0.973196	10	12.2467	0.98971	10	2.77354	1.04313	10	6.93877	0.986231	10	6.66246	1.06291	10	11.9222	0.986173	10	8.02293	1.04062	10	7.5236	0.978676	10	7.68489	623	69.6131	5.60498
Q6RUV5	Ras-related C3 botulinum toxin substrate 1 OS=Rattus norvegicus OX=10116 GN=Rac1 PE=1 SV=1 - [RAC1_RAT]	257.333	32.29	7	5	6	14	0.992622	12	4.78613	0.973812	12	13.0966	1.00951	12	6.32753	1.00718	12	2.64577	1.01407	12	5.28058	1.00408	12	4.6233	1.04412	12	8.0885	0.99912	12	7.19144	0.999393	12	3.41987	192	21.4362	8.49951
M0RBF0	Scaffold attachment factor B1 OS=Rattus norvegicus OX=10116 GN=Safb PE=1 SV=1 - [M0RBF0_RAT]	256.996	10.63	8	9	10	10	1.12175	9	5.32978	1.11307	9	1.56497	0.950829	9	5.18997	0.944289	9	3.35164	0.968617	9	7.29913	1.00576	9	5.93248	0.951245	9	4.08144	0.939645	9	7.09065	1.10212	9	5.30066	931	104.344	5.26221
Q5PPH9	Acidic (Leucine-rich) nuclear phosphoprotein 32 family, member A OS=Rattus norvegicus OX=10116 GN=Anp32a PE=2 SV=1 - [Q5PPH9_RAT]	256.464	25.1	8	7	10	18	1.03811	12	8.04848	0.995215	12	11.8325	0.983947	12	6.82936	1.00546	12	2.47761	0.965623	12	3.78138	1.00839	12	2.47722	0.968194	12	9.55819	0.977922	12	6.72711	1.05902	12	6.77032	247	28.5482	4.06885
P29419	ATP synthase subunit e, mitochondrial OS=Rattus norvegicus OX=10116 GN=Atp5me PE=1 SV=3 - [ATP5I_RAT]	256.213	49.3	1	4	4	9	0.987832	9	7.41051	1.02763	9	3.28174	0.976065	9	7.29842	0.991059	9	2.95078	1.0062	9	3.22779	1.02863	9	5.56978	0.99793	9	1.8347	1.01592	9	5.88187	1.04695	9	2.66514	71	8.24948	9.34912
A0A096MK75	Ras homolog family member G (Fragment) OS=Rattus norvegicus OX=10116 GN=Rhog PE=1 SV=1 - [A0A096MK75_RAT]	255.832	34.83	6	4	5	6	0.947757	4	12.6951	1.01224	4	13.7685	1.00143	4	5.79534	1.00081	4	5.85671	0.98722	4	10.1416	1.06675	4	3.97132	0.991405	4	12.6818	0.946527	4	7.99791	1.0587	4	12.6318	178	19.8601	7.32764
A0A0G2JU82	Microtubule-actin cross-linking factor 1 OS=Rattus norvegicus OX=10116 GN=Macf1 PE=1 SV=1 - [A0A0G2JU82_RAT]	255.297	2.67	10	13	16	21	1.06641	15	7.29267	1.08572	15	11.1231	0.993264	15	4.41374	0.973543	15	2.43514	0.990436	15	4.8749	0.967063	15	5.82243	1.00698	15	13.0642	1.00518	15	10.8475	1.05302	15	14.9128	5358	611.061	5.38916
Q9JHY2	Sideroflexin-3 OS=Rattus norvegicus OX=10116 GN=Sfxn3 PE=2 SV=1 - [SFXN3_RAT]	254.575	23.36	5	6	6	11	0.941974	10	6.50664	0.976002	10	9.35988	0.99414	10	6.64136	1.04501	10	4.54892	1.02331	10	7.61151	1.05181	10	5.73967	1.03389	10	9.77918	0.976824	10	4.33631	0.987113	10	7.81764	321	35.4106	9.74463
Q71SA3	Thrombospondin 1 OS=Rattus norvegicus OX=10116 GN=Thbs1 PE=2 SV=1 - [Q71SA3_RAT]	253.914	7.09	3	8	8	10	1.27029	10	8.15644	1.28009	10	8.054	0.907169	10	5.40812	0.903917	10	5.22392	0.888162	10	12.2472	0.909884	10	8.38434	0.888965	10	15.4153	0.860733	10	3.01061	1.3876	10	15.2604	1170	129.588	4.97021
Q5XI34	Protein phosphatase 2 (Formerly 2A), regulatory subunit A (PR 65), alpha isoform, isoform CRA_a OS=Rattus norvegicus OX=10116 GN=Ppp2r1a PE=1 SV=1 - [Q5XI34_RAT]	253.706	23.77	6	14	16	19	1.02789	17	5.76856	1.01633	17	6.75817	0.995194	17	4.79377	0.996717	17	4.71229	1.00958	17	9.01391	0.981061	17	5.97335	1.00434	17	5.48597	0.994573	17	4.56451	1.02391	17	13.1442	589	65.2809	5.10986
Q5M9G3	Caprin-1 OS=Rattus norvegicus OX=10116 GN=Caprin1 PE=1 SV=2 - [CAPR1_RAT]	253.602	9.48	2	5	5	10	1.11185	10	10.7992	1.14467	10	4.45989	0.953235	10	6.71683	0.947529	10	4.19688	0.982615	10	2.58131	0.970285	10	6.48193	0.978195	10	9.67821	0.989024	10	6.99294	1.09081	10	13.7312	707	78.0729	5.24951
P21708	Mitogen-activated protein kinase 3 OS=Rattus norvegicus OX=10116 GN=Mapk3 PE=1 SV=5 - [MK03_RAT]	252.373	24.21	15	5	8	16	0.947615	7	5.17836	0.940575	7	8.6058	1.05388	7	2.6059	1.06589	7	4.20886	0.985113	7	9.12814	1.05059	7	1.11523	0.981256	7	8.6473	1.0023	7	4.89283	0.911057	7	9.43384	380	43.0531	6.60986
P63025	Vesicle-associated membrane protein 3 OS=Rattus norvegicus OX=10116 GN=Vamp3 PE=1 SV=1 - [VAMP3_RAT]	252.262	32.04	4	2	2	5	1.07112	5	0.949093	0.998369	5	3.94658	0.939747	5	2.87789	0.963998	5	1.12573	1.00729	5	3.22087	1.01932	5	2.26704	1.02513	5	7.0669	1.00189	5	6.19224	1.06462	5	0.35389	103	11.473	8.49951
Q9JLA3	UDP-glucose:glycoprotein glucosyltransferase 1 OS=Rattus norvegicus OX=10116 GN=Uggt1 PE=1 SV=2 - [UGGG1_RAT]	250.617	7.03	3	10	12	14	0.996261	12	6.03833	1.01266	12	7.86114	0.983204	12	8.48011	0.99669	12	7.34748	1.00094	12	6.0179	1.02777	12	4.46528	1.00221	12	10.2103	0.976489	12	5.44609	1.02306	12	8.46506	1551	176.32	5.65576
Q6JE36	Protein NDRG1 OS=Rattus norvegicus OX=10116 GN=Ndrg1 PE=1 SV=1 - [NDRG1_RAT]	250.328	20.56	4	5	6	12	1.2084	11	12.7735	1.26824	11	15.8306	0.938399	11	6.27372	0.91507	11	1.89237	0.876362	11	15.0908	0.894826	11	10.1015	0.920545	11	17.2058	0.907132	11	18.2315	1.33187	11	19.5258	394	42.9269	6.18896
B5DF60	Eukaryotic translation initiation factor 4C OS=Rattus norvegicus OX=10116 GN=Eif1ax PE=1 SV=1 - [B5DF60_RAT]	250.27	36.81	10	8	8	12	0.985177	11	11.325	0.949347	11	7.94757	1.00792	11	2.74209	1.04169	11	2.96299	1.01704	11	4.65316	1.03482	11	3.46865	0.992758	11	8.36737	1.04015	11	3.52264	0.951128	11	4.01025	144	16.4502	5.23682
Q9R1E9	CCN family member 2 OS=Rattus norvegicus OX=10116 GN=Ccn2 PE=2 SV=1 - [CCN2_RAT]	249.407	42.36	4	12	12	13	1.04164	13	4.53813	1.06049	13	6.31501	0.984588	13	3.07515	0.989962	13	7.00008	0.950921	13	8.14116	0.979614	13	4.68285	0.971598	13	4.27836	0.980747	13	3.30378	1.072	13	6.94612	347	37.7298	7.86963
D3ZFY8	Ubiquitin-conjugating enzyme E2 variant 1-like OS=Rattus norvegicus OX=10116 GN=LOC100912618 PE=1 SV=1 - [D3ZFY8_RAT]	248.433	42.86	3	2	6	11	1.03262	2	7.35472	0.933936	2	9.70281	1.001	2	6.06821	0.945231	2	6.16083	1.03937	2	9.13214	0.982327	2	10.8911	1.06834	2	1.12427	1.052	2	6.90746	0.973544	2	4.48203	147	16.3442	7.95752
P27605	Hypoxanthine-guanine phosphoribosyltransferase OS=Rattus norvegicus OX=10116 GN=Hprt1 PE=1 SV=1 - [HPRT_RAT]	248.188	38.53	3	7	7	13	0.978353	13	8.20858	0.942519	13	6.72294	1.01607	13	2.6617	1.03916	13	2.36787	1.0006	13	6.69399	1.04594	13	4.75241	1.01156	13	6.1318	1.01915	13	4.4734	0.93349	13	5.62391	218	24.4615	6.53662
A0A0G2K5E8	Collagen, type I, alpha 2 OS=Rattus norvegicus OX=10116 GN=NEWGENE_621351 PE=1 SV=1 - [A0A0G2K5E8_RAT]	248.178	7.61	4	8	8	9	1.22569	9	7.28538	1.19012	9	9.91815	0.892435	9	10.603	0.842236	9	10.8871	0.949331	9	13.9212	0.849873	9	12.3748	0.924189	9	13.934	0.9078	9	7.86689	1.25704	9	17.2997	1274	119.972	9.20264
A0A140TAI1	Ubiquilin 1, isoform CRA_a OS=Rattus norvegicus OX=10116 GN=Ubqln1 PE=1 SV=1 - [A0A140TAI1_RAT]	247.761	10.82	3	4	4	8	0.92986	8	7.69357	0.933216	8	7.53838	0.991052	8	1.44431	1.03538	8	7.74872	1.045	8	4.14725	1.06646	8	5.52273	0.99814	8	11.4788	1.04732	8	3.9976	0.958316	8	10.7941	582	61.9753	4.94482
Q6P9U8	Eukaryotic translation initiation factor 3 subunit H OS=Rattus norvegicus OX=10116 GN=Eif3h PE=1 SV=1 - [EIF3H_RAT]	247.06	22.73	4	8	9	12	0.990379	11	7.91354	0.972153	11	6.9618	0.994773	11	3.42442	1.03916	11	7.23671	1.02491	11	9.59672	1.03275	11	5.15749	1.0043	11	17.8844	0.995814	11	6.9318	0.91706	11	9.49118	352	39.88	6.66846
B2RZ08	RGD1563325 protein OS=Rattus norvegicus OX=10116 GN=Tmem263 PE=1 SV=1 - [B2RZ08_RAT]	246.866	44.35	1	4	4	5	1.004	5	3.77073	1.04002	5	3.32057	0.996437	5	5.6273	1.03518	5	4.14355	0.913886	5	4.83958	1.03141	5	1.11093	0.915247	5	2.96722	0.930991	5	2.76735	1.04965	5	4.0965	115	11.542	9.31982
P52873	Pyruvate carboxylase, mitochondrial OS=Rattus norvegicus OX=10116 GN=Pc PE=1 SV=2 - [PYC_RAT]	246.854	8.4	14	8	10	11	0.940639	9	7.86412	0.975312	9	5.63009	0.970865	9	3.80055	1.0127	9	5.33931	1.01079	9	5.2548	1.0046	9	5.46313	1.01447	9	7.85822	1.04078	9	4.11535	1.03692	9	9.32843	1178	129.695	6.81494
I6L9G5	Reticulocalbin-3 OS=Rattus norvegicus OX=10116 GN=Rcn3 PE=1 SV=1 - [RCN3_RAT]	246.081	12.5	3	3	3	6	1.66462	6	6.14475	1.56319	6	6.04663	0.791392	6	6.46743	0.764909	6	7.44607	0.774009	6	9.60112	0.791257	6	5.81824	0.765692	6	4.48316	0.729816	6	5.44456	1.56264	6	5.81971	328	37.9182	4.86865
P34926	Microtubule-associated protein 1A OS=Rattus norvegicus OX=10116 GN=Map1a PE=1 SV=1 - [MAP1A_RAT]	245.896	5.88	4	15	15	17	0.932797	17	7.42627	0.945713	17	7.89273	1.00658	17	5.94337	1.04188	17	4.55721	1.05338	17	4.15576	1.00977	17	7.28512	1.03354	17	7.40057	1.03867	17	7.25697	0.946463	17	14.0624	2774	299.348	4.94482
A0A0G2JUA7	NCK adaptor protein 1 OS=Rattus norvegicus OX=10116 GN=Nck1 PE=1 SV=1 - [A0A0G2JUA7_RAT]	245.268	18.18	4	7	7	10	1.03623	10	8.12472	1.02542	10	3.9034	0.98575	10	2.65082	1.00352	10	3.41991	0.971095	10	4.74642	1.02702	10	1.8643	0.962673	10	4.77431	1.00628	10	4.39	1.03961	10	8.87095	374	42.342	6.1001
A0A0G2JXC3	40S ribosomal protein S21 OS=Rattus norvegicus OX=10116 GN=Rps21 PE=1 SV=1 - [A0A0G2JXC3_RAT]	245.237	43.21	15	5	5	9	0.945122	9	12.0503	1.02053	9	22.3336	1.02355	9	16.2072	0.945368	9	2.76156	1.0432	9	9.64958	0.929999	9	7.60037	1.03675	9	24.3574	1.01349	9	14.8259	1.03001	9	41.0894	81	8.86043	8.51416
Q9JKL3	Apoptosis regulator BAX OS=Rattus norvegicus OX=10116 GN=Bax PE=1 SV=1 - [Q9JKL3_RAT]	244.83	25.43	3	3	3	6	0.971449	6	2.26243	0.981927	6	3.83851	1.01515	6	1.04364	0.991871	6	1.28066	1.03389	6	3.07881	0.980649	6	3.41998	1.0199	6	2.90982	1.05691	6	2.86299	0.978349	6	4.03961	173	19.6481	5.21143
P20070	NADH-cytochrome b5 reductase 3 OS=Rattus norvegicus OX=10116 GN=Cyb5r3 PE=1 SV=2 - [NB5R3_RAT]	244.583	26.25	1	10	10	19	1.00108	19	5.32391	0.983447	19	10.8765	0.987941	19	3.98711	1.00264	19	2.78377	1.03807	19	4.20844	1.01324	19	5.60111	1.00242	19	7.41157	0.988501	19	7.18568	1.02384	19	9.57595	301	34.1527	8.38232
A0A0G2JSL8	Adenosine kinase OS=Rattus norvegicus OX=10116 GN=Adk PE=1 SV=1 - [A0A0G2JSL8_RAT]	244.247	13.02	3	3	3	7	1.03377	7	6.43385	1.02514	7	8.36776	0.961763	7	4.95707	0.992034	7	4.57725	0.970042	7	10.7362	1.00229	7	4.37022	0.932758	7	7.91294	0.942081	7	6.27409	1.0986	7	19.4669	361	40.1073	6.20166
B1H2A6	FMR1 autosomal homolog 2 OS=Rattus norvegicus OX=10116 GN=Fxr2 PE=1 SV=1 - [B1H2A6_RAT]	244.04	12.59	2	5	7	8	0.942605	6	4.84645	0.929517	6	6.71811	1.02805	6	2.84224	1.0029	6	3.52392	1.04433	6	4.65343	1.01075	6	0.701428	1.08216	6	5.61963	1.03813	6	3.76502	0.920193	6	9.47576	675	74.3292	6.1001
D3ZVQ0	Ubiquitin carboxyl-terminal hydrolase OS=Rattus norvegicus OX=10116 GN=Usp5 PE=1 SV=1 - [D3ZVQ0_RAT]	243.85	12.94	2	12	12	16	0.996387	16	6.10647	0.994142	16	6.31751	1.00342	16	4.78049	0.999836	16	4.90353	0.993579	16	3.85098	1.00665	16	6.01424	1.02304	16	5.27169	0.998742	16	4.53694	0.962167	16	5.04048	858	95.7183	5.0083
M0RC99	Ras-related protein Rab-5A OS=Rattus norvegicus OX=10116 GN=Rab5a PE=2 SV=1 - [RAB5A_RAT]	243.657	19.53	3	1	4	8	0.94741	2	0.76631	0.939297	2	9.19544	1.04533	2	3.66042	0.994875	2	0.125579	1.0138	2	2.813	1.07185	2	3.30066	1.00688	2	1.73399	1.02208	2	2.06102	0.926014	2	2.03597	215	23.6098	8.14795
O35244	Peroxiredoxin-6 OS=Rattus norvegicus OX=10116 GN=Prdx6 PE=1 SV=3 - [PRDX6_RAT]	243.493	38.39	1	6	7	12	0.826275	11	4.06271	0.828849	11	2.94195	1.08732	11	5.80539	1.10202	11	5.73276	1.02486	11	2.99236	1.10876	11	2.29797	1.02523	11	4.56833	1.04047	11	3.60395	0.838626	11	7.01551	224	24.803	5.93506
A0A0G2JST3	Cytokeratin-1 OS=Rattus norvegicus OX=10116 GN=Krt1 PE=1 SV=1 - [A0A0G2JST3_RAT]	243.059	6.72	3	2	4	8	0.875673	4	2.87438	0.857565	4	4.68165	0.749869	4	3.73019	0.716457	4	5.63682	1.47756	4	5.36018	0.716294	4	4.13276	1.50193	4	2.2293	1.46321	4	5.48906	0.779646	4	4.28112	625	64.7171	7.92822
Q6P6Q7	Signal transducer and activator of transcription OS=Rattus norvegicus OX=10116 GN=Stat1 PE=2 SV=1 - [Q6P6Q7_RAT]	242.65	16.01	6	10	11	12	1.27697	11	5.13618	1.2654	11	4.34197	0.916823	11	3.40992	0.918225	11	2.33361	0.892271	11	6.27743	0.905093	11	3.18449	0.902083	11	5.75662	0.903545	11	3.83051	1.29068	11	7.95887	712	83.0583	6.15088
E9PTX9	Solute carrier family 12 member 2 OS=Rattus norvegicus OX=10116 GN=Slc12a2 PE=1 SV=1 - [E9PTX9_RAT]	242.611	8.4	3	8	9	11	1.1101	9	2.56157	1.13943	9	2.44966	0.932497	9	3.5832	0.984937	9	2.71885	0.93041	9	1.95902	0.994023	9	5.42099	0.922494	9	2.74713	0.937906	9	3.72694	1.15936	9	6.61146	1203	130.284	6.52197
G3V6C4	UDP-glucose 6-dehydrogenase OS=Rattus norvegicus OX=10116 GN=Ugdh PE=1 SV=1 - [G3V6C4_RAT]	242.16	12.17	2	5	5	7	0.875885	7	6.32609	0.906877	7	8.87848	1.08538	7	3.69974	1.1006	7	2.2661	0.953085	7	5.05779	1.14647	7	6.75396	0.962751	7	5.68335	0.981807	7	6.73044	0.853451	7	14.1702	493	54.8523	7.34229
A0A6F8P9J1	Lysosomal associated membrane protein 1 OS=Rattus norvegicus OX=10116 GN=Lamp1 PE=2 SV=1 - [A0A6F8P9J1_RAT]	240.636	12.29	3	5	5	8	1.13088	8	12.2328	1.13734	8	8.21147	0.946211	8	8.70924	0.957759	8	6.86088	0.912093	8	8.89072	0.997589	8	5.80507	0.945581	8	7.65185	0.950633	8	8.50589	1.1253	8	15.5283	407	43.9552	8.07471
P24155	Thimet oligopeptidase OS=Rattus norvegicus OX=10116 GN=Thop1 PE=1 SV=4 - [THOP1_RAT]	240.591	14.26	2	8	8	11	0.904478	11	6.12683	0.903694	11	5.77025	1.01665	11	4.82594	1.0386	11	7.15722	1.05485	11	3.5967	1.05328	11	4.9195	1.06984	11	6.73161	1.05362	11	6.26716	0.909585	11	9.45805	687	78.3354	5.93506
B0BN93	26S proteasome non-ATPase regulatory subunit 13 OS=Rattus norvegicus OX=10116 GN=Psmd13 PE=1 SV=1 - [PSD13_RAT]	240.583	20.48	1	8	8	10	0.979196	10	11.2889	0.981848	10	9.24646	1.02818	10	3.02413	1.00208	10	7.67056	0.996903	10	11.5814	1.05023	10	6.78766	1.02377	10	11.5431	0.984961	10	6.34013	0.975465	10	8.12216	376	42.7902	5.8335
M0R5N4	Prefoldin subunit 4 OS=Rattus norvegicus OX=10116 GN=Pfdn4 PE=1 SV=2 - [M0R5N4_RAT]	240.418	18.71	1	2	2	4	0.976718	4	6.91003	0.982792	4	7.85373	1.02504	4	0.639162	1.04853	4	2.20942	0.988387	4	1.66812	1.0559	4	1.28101	0.972274	4	1.38444	0.988883	4	5.00423	0.975316	4	5.28164	139	15.7728	4.729
B1WC49	Api5 protein OS=Rattus norvegicus OX=10116 GN=Api5 PE=1 SV=1 - [B1WC49_RAT]	240.15	17.66	4	8	9	10	1.03025	9	7.41773	1.06225	9	2.73238	0.972098	9	4.10881	1.02874	9	2.42791	0.991813	9	5.84891	1.02449	9	3.40454	0.942116	9	6.72306	0.975521	9	6.76656	1.05899	9	4.90362	504	56.7498	5.92236
Q8VI04	Isoaspartyl peptidase/L-asparaginase OS=Rattus norvegicus OX=10116 GN=Asrgl1 PE=1 SV=1 - [ASGL1_RAT]	240.009	22.22	6	6	7	12	1.06972	8	4.76025	1.07697	8	10.9518	0.979175	8	3.14886	0.98387	8	4.27059	0.940755	8	6.11476	0.984342	8	3.07257	0.970909	8	4.24694	0.962784	8	10.3344	1.1205	8	4.97589	333	34.3886	7.88428
A0A0G2JU07	Ubiquitin-conjugating enzyme E2 variant 2 OS=Rattus norvegicus OX=10116 GN=Ube2v2 PE=1 SV=1 - [A0A0G2JU07_RAT]	239.976	38.62	3	1	5	10	1.04152	1		1.02352	1		0.99871	1		1.00033	1		0.994098	1		0.981722	1		0.97369	1		1.0116	1		1.02877	1		145	16.4463	8.07471
F1MAA7	Laminin subunit gamma 1 OS=Rattus norvegicus OX=10116 GN=Lamc1 PE=1 SV=1 - [F1MAA7_RAT]	239.15	5.1	5	6	7	8	0.93886	7	6.68978	0.980078	7	4.06533	1.0153	7	3.26641	1.03615	7	3.54983	1.00857	7	4.5545	1.05942	7	3.13836	1.00693	7	5.8983	1.03715	7	3.04404	0.950912	7	9.70195	1607	177.273	5.22412
Q5U2R7	LRP chaperone MESD OS=Rattus norvegicus OX=10116 GN=Mesd PE=2 SV=1 - [MESD_RAT]	239.055	34.38	1	8	8	15	1.03734	15	6.8675	1.05581	15	5.86882	0.972088	15	3.06714	0.983601	15	3.34258	0.995087	15	4.18348	1.01079	15	5.36451	0.962615	15	4.58843	0.962059	15	5.05459	1.05707	15	2.9705	224	25.1997	5.65576
A0A0G2JUS0	Protein quaking-like OS=Rattus norvegicus OX=10116 GN=LOC108348175 PE=4 SV=1 - [A0A0G2JUS0_RAT]	238.946	31.27	13	8	11	13	1.0683	10	6.27126	1.07024	10	4.91853	0.962561	10	2.78619	0.988815	10	4.02194	0.968905	10	4.03345	1.01228	10	3.99324	0.976765	10	4.5766	0.970399	10	5.7596	1.03972	10	8.48053	323	35.7956	6.12549
F1LP76	Elongator complex protein 1 OS=Rattus norvegicus OX=10116 GN=Elp1 PE=1 SV=2 - [F1LP76_RAT]	238.828	6.99	2	8	8	9	0.924792	9	7.41701	0.931309	9	5.09741	1.0401	9	1.12303	1.0269	9	2.87606	0.993048	9	9.7868	1.06719	9	7.09786	1.03125	9	4.20837	0.990264	9	7.85293	0.918468	9	9.21152	1331	149.104	6.34131
Q68FY0	Cytochrome b-c1 complex subunit 1, mitochondrial OS=Rattus norvegicus OX=10116 GN=Uqcrc1 PE=1 SV=1 - [QCR1_RAT]	238.776	11.46	2	5	5	7	0.960245	7	10.356	0.915132	7	2.47177	1.04243	7	2.56279	1.02859	7	6.04393	1.04653	7	3.81211	0.983953	7	4.91442	1.06028	7	6.11585	1.01604	7	7.45458	0.89168	7	7.6187	480	52.8154	5.88428
P05943	Protein S100-A10 OS=Rattus norvegicus OX=10116 GN=S100a10 PE=1 SV=2 - [S10AA_RAT]	238.575	29.47	1	3	4	18	1.14786	16	2.7384	1.19191	16	8.37414	0.973213	16	5.41274	0.97246	16	2.81818	0.882726	16	5.60022	1.00038	16	1.63001	0.880131	16	3.12717	0.881175	16	5.5025	1.17669	16	11.7198	95	11.0675	6.771
Q5RK30	Ribosome maturation protein SBDS OS=Rattus norvegicus OX=10116 GN=Sbds PE=2 SV=1 - [SBDS_RAT]	237.775	32.4	2	7	9	11	1.04362	9	7.20393	1.07718	9	2.55216	0.990733	9	3.41022	0.996543	9	3.1656	0.932215	9	3.78917	1.05743	9	3.47645	0.954094	9	6.56371	0.949984	9	5.94751	1.05355	9	0.61921	250	28.7343	8.74854
Q6AYS7	Aminoacylase-1A OS=Rattus norvegicus OX=10116 GN=Acy1a PE=1 SV=1 - [ACY1A_RAT]	237.227	12.75	2	6	6	8	0.86319	8	10.6419	0.82924	8	1.82636	1.08043	8	3.82255	1.08144	8	2.88703	1.059	8	5.35397	1.03476	8	6.75317	1.06623	8	1.35186	1.03139	8	2.6363	0.796969	8	8.37226	408	45.7751	6.48096
Q5XI78	2-oxoglutarate dehydrogenase, mitochondrial OS=Rattus norvegicus OX=10116 GN=Ogdh PE=1 SV=1 - [ODO1_RAT]	237.105	10.36	12	11	12	16	0.989982	14	9.40735	0.957844	14	8.30633	1.01495	14	3.63839	1.02162	14	7.86533	0.984056	14	6.66647	1.01606	14	7.45926	0.970239	14	5.71814	0.984361	14	6.64326	1.00332	14	9.68271	1023	116.221	6.771
P62142	Serine/threonine-protein phosphatase PP1-beta catalytic subunit OS=Rattus norvegicus OX=10116 GN=Ppp1cb PE=1 SV=3 - [PP1B_RAT]	236.849	16.51	8	3	5	9	1.0482	4	6.61928	0.993172	4	4.7078	1.02229	4	2.03665	1.0086	4	1.15982	0.990896	4	9.01224	0.994116	4	3.49025	0.991144	4	9.41137	0.978652	4	3.51322	1.04055	4	3.17687	327	37.1626	6.18896
F1LQ00	Collagen type V alpha 2 chain OS=Rattus norvegicus OX=10116 GN=Col5a2 PE=1 SV=3 - [F1LQ00_RAT]	236.515	8.1	2	8	9	11	1.17848	10	8.38771	1.27697	10	19.1124	0.96488	10	4.72292	0.925138	10	13.1428	0.895239	10	7.41983	0.905014	10	13.0757	0.865594	10	8.61743	0.922408	10	10.7594	1.27255	10	20.1616	1494	145.112	6.69775
Q07205	Eukaryotic translation initiation factor 5 OS=Rattus norvegicus OX=10116 GN=Eif5 PE=1 SV=1 - [IF5_RAT]	236.39	21.68	1	7	7	9	0.863859	9	9.62393	0.862304	9	2.9912	1.03227	9	4.1685	1.05499	9	3.92242	1.02496	9	4.2223	1.06822	9	6.02445	1.05462	9	11.3102	1.04446	9	8.2574	0.853782	9	13.7494	429	48.9237	5.51611
P61354	60S ribosomal protein L27 OS=Rattus norvegicus OX=10116 GN=Rpl27 PE=2 SV=2 - [RL27_RAT]	236.161	49.26	12	8	10	28	1.03051	24	7.81548	1.02937	24	6.83769	1.01258	24	3.62194	1.04715	24	4.25065	0.960499	24	6.41998	1.02368	24	6.97918	0.966413	24	7.66182	0.945479	24	6.72425	1.01148	24	8.53376	136	15.7877	10.5649
D3ZRX9	Calponin (Fragment) OS=Rattus norvegicus OX=10116 GN=Cnn2 PE=1 SV=3 - [D3ZRX9_RAT]	236.131	21	8	3	5	13	0.961866	8	7.80052	0.990609	8	9.14345	1.00706	8	3.87714	1.00537	8	3.2737	0.973714	8	9.9666	0.988828	8	8.51193	1.01157	8	5.06766	1.0238	8	3.26183	1.07053	8	2.16284	219	24.054	8.68994
D4A3S8	NOL1/NOP2/Sun domain family member 2 OS=Rattus norvegicus OX=10116 GN=Nsun2 PE=1 SV=1 - [D4A3S8_RAT]	235.604	12.53	4	7	8	10	0.940094	9	10.6606	0.908562	9	4.53405	0.998738	9	4.93647	1.0323	9	2.94118	1.01889	9	4.64526	1.03795	9	8.54899	1.0219	9	7.55088	1.04576	9	1.4369	0.990493	9	15.3351	782	88.0345	7.03467
D4A2G9	RAN-binding protein 1 OS=Rattus norvegicus OX=10116 GN=Ranbp1 PE=1 SV=1 - [D4A2G9_RAT]	235.554	24.63	13	7	8	15	0.95865	14	3.44053	0.923952	14	3.67827	1.01822	14	2.58724	1.02362	14	3.06499	1.03734	14	4.30781	1.02608	14	4.44015	1.00347	14	5.27549	1.02972	14	5.66227	0.924345	14	9.34294	203	23.5817	5.22412
G3V8A5	Vacuolar protein sorting-associated protein 35 OS=Rattus norvegicus OX=10116 GN=Vps35 PE=1 SV=1 - [G3V8A5_RAT]	234.987	9.67	8	5	7	16	1.0856	11	14.1691	1.14587	11	13.6752	0.997792	11	4.57351	1.0085	11	6.04866	0.855009	11	22.1131	1.01423	11	7.16756	0.909851	11	17.0671	0.933126	11	13.3614	1.05447	11	16.9076	796	91.6688	5.43994
P12711	Alcohol dehydrogenase class-3 OS=Rattus norvegicus OX=10116 GN=Adh5 PE=1 SV=2 - [ADHX_RAT]	234.918	32.62	3	9	10	16	0.948262	13	4.75338	0.973091	13	4.02568	1.03494	13	3.06144	1.04459	13	4.10668	0.975656	13	10.0852	1.06261	13	7.90236	0.992406	13	9.6523	1.01017	13	4.06899	0.974218	13	7.51236	374	39.5502	7.48877
P62919	60S ribosomal protein L8 OS=Rattus norvegicus OX=10116 GN=Rpl8 PE=2 SV=2 - [RL8_RAT]	234.744	40.08	2	17	17	30	1.03347	30	8.96957	0.992715	30	10.5783	0.991971	30	4.90472	1.01945	30	3.10223	1.00055	30	8.63387	1.00654	30	7.17302	0.975438	30	5.452	0.978931	30	8.1009	1.02398	30	9.9524	257	28.0073	11.0337
P47860	ATP-dependent 6-phosphofructokinase, platelet type OS=Rattus norvegicus OX=10116 GN=Pfkp PE=1 SV=2 - [PFKAP_RAT]	234.728	11.93	7	3	8	9	0.796765	3	7.99378	0.892697	3	3.19827	1.07848	3	2.3527	1.07056	3	5.53474	1.02773	3	1.78813	1.07438	3	7.35115	0.980295	3	0.602484	1.04997	3	3.8157	0.803363	3	0.540209	788	85.6654	7.28369
Q6TUG0	DnaJ homolog subfamily B member 11 OS=Rattus norvegicus OX=10116 GN=Dnajb11 PE=2 SV=1 - [DJB11_RAT]	233.981	14.25	1	6	6	9	1.03205	9	3.52817	0.999158	9	6.09898	1.03676	9	4.65147	0.998154	9	1.82226	0.974507	9	7.92553	0.977441	9	2.87596	1.01705	9	5.11457	0.990179	9	5.05607	1.03923	9	7.29762	358	40.4697	6.31592
G3V7Q6	Proteasome subunit beta OS=Rattus norvegicus OX=10116 GN=Psmb5 PE=1 SV=1 - [G3V7Q6_RAT]	233.635	26.62	2	6	6	8	1.04267	8	7.31861	1.03935	8	4.95771	0.96782	8	10.7221	0.975917	8	2.29117	1.02307	8	3.81052	0.982099	8	3.45322	1.02582	8	3.85827	0.9947	8	7.09854	1.03659	8	8.3395	263	28.5412	7.02002
Q68FX0	Isocitrate dehydrogenase [NAD] subunit beta, mitochondrial OS=Rattus norvegicus OX=10116 GN=Idh3B PE=2 SV=1 - [IDH3B_RAT]	233.07	19.48	2	7	7	11	0.922551	11	10.0361	0.914458	11	6.98369	1.0066	11	4.14846	1.03076	11	5.57993	1.00689	11	2.32934	1.05614	11	8.96869	1.00233	11	6.71159	1.03312	11	6.17286	0.957705	11	10.6323	385	42.3268	8.74854
P16446	Phosphatidylinositol transfer protein alpha isoform OS=Rattus norvegicus OX=10116 GN=Pitpna PE=1 SV=2 - [PIPNA_RAT]	232.338	35.79	2	8	9	12	0.993818	11	3.19206	0.97265	11	2.95314	0.99539	11	5.15909	0.985314	11	3.88678	1.01681	11	4.38567	1.01665	11	6.34993	1.02393	11	3.93729	1.02666	11	3.47347	0.964	11	4.75434	271	31.8871	6.3667
F1LM33	Leucine-rich PPR motif-containing protein, mitochondrial OS=Rattus norvegicus OX=10116 GN=Lrpprc PE=1 SV=2 - [F1LM33_RAT]	232.131	8.91	26	13	14	16	0.924617	15	6.26406	0.93587	15	10.7642	1.01444	15	3.29577	1.04006	15	5.45953	1.02195	15	5.82417	1.04158	15	3.90919	0.990075	15	7.16108	1.00156	15	8.9118	0.966221	15	8.80968	1392	156.581	6.60986
P19468	Glutamate--cysteine ligase catalytic subunit OS=Rattus norvegicus OX=10116 GN=Gclc PE=1 SV=2 - [GSH1_RAT]	231.951	12.24	1	6	6	9	0.971477	9	5.45656	0.998253	9	4.88473	0.996964	9	1.96334	1.01958	9	2.26306	1.00655	9	7.47616	1.04195	9	3.9053	0.995881	9	5.66268	1.01592	9	7.38474	0.915363	9	4.28475	637	72.573	5.63037
Q498U4	SAP domain-containing ribonucleoprotein OS=Rattus norvegicus OX=10116 GN=Sarnp PE=1 SV=3 - [SARNP_RAT]	231.951	24.76	1	4	4	6	1.03714	6	6.15304	1.01933	6	4.06874	0.989685	6	3.10699	0.990619	6	3.55853	1.03685	6	4.8061	0.997836	6	5.86624	1.02707	6	1.604	0.992854	6	3.57061	0.953122	6	8.04539	210	23.5904	6.65381
Q4KM73	UMP-CMP kinase OS=Rattus norvegicus OX=10116 GN=Cmpk1 PE=1 SV=2 - [KCY_RAT]	231.11	34.18	9	6	8	15	1.06198	13	2.45573	1.08481	13	7.04905	0.97071	13	4.58563	0.970919	13	4.09214	0.978809	13	9.0401	1.01251	13	4.36182	0.958545	13	7.05811	0.951649	13	4.74147	1.10426	13	7.94823	196	22.1552	5.8335
Q31266	MHC class I RT1.Aw3 protein OS=Rattus norvegicus OX=10116 PE=2 SV=1 - [Q31266_RAT]	230.719	20	120	7	7	12	0.990264	12	7.36594	1.00834	12	6.24761	1.04617	12	3.84414	1.02528	12	2.83699	0.957045	12	6.34075	1.06204	12	4.85927	0.993883	12	9.5452	0.952531	12	5.08948	0.97515	12	9.35695	360	40.6883	6.45557
A0A0G2JYA4	Serine/threonine-protein phosphatase OS=Rattus norvegicus OX=10116 GN=LOC100362453 PE=3 SV=1 - [A0A0G2JYA4_RAT]	230.235	28.8	10	5	7	9	1.0296	7	3.32348	1.04133	7	7.87908	0.97749	7	8.02475	0.965963	7	8.23449	0.947656	7	4.84259	0.990086	7	9.99838	0.959792	7	6.07292	0.971349	7	2.97557	1.0794	7	11.7028	309	35.5003	5.42725
P10888	Cytochrome c oxidase subunit 4 isoform 1, mitochondrial OS=Rattus norvegicus OX=10116 GN=Cox4i1 PE=1 SV=1 - [COX41_RAT]	230.185	31.36	1	5	5	10	0.94151	10	9.70468	0.937342	10	7.91189	1.01367	10	3.57018	1.03106	10	3.28367	1.01029	10	8.89511	1.05403	10	2.74518	1.00663	10	5.62761	1.03887	10	4.79407	0.925092	10	11.609	169	19.5021	9.43701
P21775	3-ketoacyl-CoA thiolase A, peroxisomal OS=Rattus norvegicus OX=10116 GN=Acaa1a PE=1 SV=2 - [THIKA_RAT]	230.142	25.94	3	7	7	9	0.983504	9	5.13062	1.00858	9	5.59922	0.999551	9	3.61826	1.01819	9	6.5274	0.964483	9	4.33109	1.07145	9	1.74349	0.998211	9	7.67693	0.967805	9	4.36081	0.983347	9	13.1925	424	43.8057	8.22119
G3V936	Citrate synthase OS=Rattus norvegicus OX=10116 GN=Cs PE=1 SV=1 - [G3V936_RAT]	229.642	19.1	7	11	11	16	1.00081	15	6.45478	1.01142	15	4.62812	0.992305	15	3.68317	1.03255	15	3.23389	1.00984	15	3.21428	1.03416	15	3.87804	0.978392	15	5.08282	1.00927	15	9.60344	0.96324	15	10.3964	466	51.7975	8.41162
A0A0G2JSH5	Albumin OS=Rattus norvegicus OX=10116 GN=Alb PE=1 SV=1 - [A0A0G2JSH5_RAT]	229.105	7.24	5	4	5	7	0.836351	6	11.1171	0.848676	6	5.80003	1.02454	6	4.05867	1.04887	6	1.79363	1.08651	6	3.52465	1.05059	6	3.8254	1.10391	6	7.85569	1.10278	6	10.968	0.829789	6	16.4487	608	68.7141	6.48096
G3V8Y8	Huntingtin interacting protein 1, isoform CRA_a OS=Rattus norvegicus OX=10116 GN=Hip1 PE=1 SV=1 - [G3V8Y8_RAT]	228.859	5.15	2	4	4	5	1.05817	5	3.47747	1.03106	5	5.14264	0.960209	5	1.95864	1.02518	5	6.04905	0.983451	5	4.49578	1.01084	5	3.44782	1.01664	5	5.5905	0.982276	5	3.91825	1.06055	5	3.41676	1030	114.932	5.41455
Q63413	Spliceosome RNA helicase Ddx39b OS=Rattus norvegicus OX=10116 GN=Ddx39b PE=2 SV=3 - [DX39B_RAT]	228.389	17.06	6	4	8	14	1.03184	6	5.47957	1.02843	6	8.66536	0.972013	6	8.43029	0.986501	6	4.57034	1.03623	6	4.45319	0.994697	6	3.65352	0.991741	6	10.2962	0.976021	6	5.5755	1.05106	6	11.7916	428	49.004	5.66846
P54311	Guanine nucleotide-binding protein G(I)/G(S)/G(T) subunit beta-1 OS=Rattus norvegicus OX=10116 GN=Gnb1 PE=1 SV=4 - [GBB1_RAT]	228.149	11.47	9	2	4	7	1.06837	3	8.82933	1.10041	3	0.345031	0.993749	3	0.0221268	1.00382	3	1.50055	0.932078	3	10.897	0.973322	3	0.512589	0.938571	3	4.70197	1.00337	3	0.885921	1.08224	3	12.6299	340	37.353	5.99854
P84586	RNA-binding motif protein, X chromosome retrogene-like OS=Rattus norvegicus OX=10116 GN=Rbmxrtl PE=1 SV=1 - [RMXRL_RAT]	227.897	27.32	6	12	13	17	1.0664	16	9.12945	1.10925	16	7.42296	0.94461	16	3.54101	0.967725	16	3.60376	0.944057	16	6.85925	0.963557	16	4.59439	0.969355	16	8.23325	0.971249	16	5.42615	1.039	16	17.7297	388	42.1783	9.99365
P21670	Proteasome subunit alpha type-4 OS=Rattus norvegicus OX=10116 GN=Psma4 PE=1 SV=1 - [PSA4_RAT]	227.581	19.54	7	6	7	11	0.964855	10	3.77097	0.973886	10	7.42748	1.01957	10	3.10945	1.01446	10	3.43722	0.998193	10	5.0691	1.02898	10	3.94952	0.981006	10	4.24847	0.991682	10	4.56844	1.00215	10	8.30104	261	29.4792	7.72314
P62250	40S ribosomal protein S16 OS=Rattus norvegicus OX=10116 GN=Rps16 PE=1 SV=2 - [RS16_RAT]	227.53	47.95	9	8	9	16	0.999909	15	8.4259	0.957632	15	13.3578	1.02814	15	4.25251	1.06585	15	5.69474	0.953243	15	14.4592	1.06943	15	3.64682	0.972972	15	14.9343	0.93424	15	11.4702	0.989228	15	20.8268	146	16.435	10.2134
Q5U216	ATP-dependent RNA helicase DDX39A OS=Rattus norvegicus OX=10116 GN=Ddx39a PE=2 SV=1 - [DX39A_RAT]	227.271	13.11	1	2	6	10	1.12913	2	3.20217	1.06936	2	2.10545	0.92657	2	2.46674	1.00049	2	12.7204	0.994501	2	2.97376	0.956751	2	1.96798	0.901027	2	8.80377	0.94464	2	13.9717	1.1991	2	2.20933	427	49.078	5.68115
G3V9U2	3-ketoacyl-CoA thiolase, mitochondrial OS=Rattus norvegicus OX=10116 GN=Acaa2 PE=1 SV=3 - [G3V9U2_RAT]	227.133	20.91	3	7	7	10	1.14667	10	8.75098	1.17493	10	7.55925	0.905662	10	5.2688	0.964858	10	2.86579	0.940372	10	3.21706	0.940825	10	4.48312	0.969676	10	3.60526	0.94759	10	2.49579	1.16237	10	7.28998	397	41.8585	8.14795
P81795	Eukaryotic translation initiation factor 2 subunit 3, X-linked OS=Rattus norvegicus OX=10116 GN=Eif2s3 PE=1 SV=2 - [IF2G_RAT]	226.928	27.75	13	2	13	20	1.00851	2	4.81543	0.960773	2	0.76017	1.02063	2	1.67328	0.986043	2	2.43251	0.976505	2	7.28817	0.999572	2	2.98848	0.995371	2	11.6284	1.01768	2	3.92952	1.06258	2	10.4504	472	51.0472	8.39697
Q5U2U2	Crk-like protein OS=Rattus norvegicus OX=10116 GN=Crkl PE=1 SV=1 - [CRKL_RAT]	226.294	18.48	1	4	4	7	0.906655	7	7.66854	0.941234	7	11.2828	0.976261	7	7.85995	1.02649	7	3.37042	1.035	7	7.63503	1.03196	7	4.98002	1.00626	7	10.8119	1.0248	7	8.25078	0.902696	7	16.9618	303	33.844	6.7417
P09330	Ribose-phosphate pyrophosphokinase 2 OS=Rattus norvegicus OX=10116 GN=Prps2 PE=1 SV=3 - [PRPS2_RAT]	226.262	17.61	4	2	6	9	0.976828	3	9.22892	0.954284	3	1.71862	1.02188	3	1.23098	0.935475	3	2.00437	1.07805	3	8.23073	0.920276	3	0.398894	1.0867	3	8.03439	1.11349	3	1.16345	0.868583	3	3.97324	318	34.791	6.60986
Q4KLH7	RAD21 cohesin complex component OS=Rattus norvegicus OX=10116 GN=Rad21 PE=1 SV=1 - [Q4KLH7_RAT]	226.113	4.72	3	2	3	6	1.23626	5	3.7315	1.2637	5	3.07225	0.930306	5	5.84842	0.968625	5	11.2548	0.85481	5	10.5623	0.958073	5	14.7482	0.920655	5	35.9723	0.892247	5	12.4737	1.29102	5	4.78261	635	71.9469	4.64014
A0A0G2K719	RNA helicase OS=Rattus norvegicus OX=10116 GN=Ddx3x PE=1 SV=1 - [A0A0G2K719_RAT]	225.618	13.44	3	2	9	15	0.902227	2	2.54493	0.890474	2	3.7024	1.07148	2	2.02151	0.972074	2	4.18111	1.09979	2	3.15619	0.938576	2	5.95021	1.11643	2	4.44384	1.12237	2	0.0455709	0.858353	2	0.0658441	662	73.1001	7.18115
Q5U2V1	Peptidylprolyl isomerase OS=Rattus norvegicus OX=10116 GN=Fkbp10 PE=1 SV=1 - [Q5U2V1_RAT]	225.287	9.47	2	5	5	7	1.02531	7	5.8795	1.06716	7	5.37909	0.983778	7	2.39523	1.01093	7	2.48571	0.942885	7	6.86274	1.02586	7	8.04241	0.902971	7	5.42004	0.953558	7	5.07597	1.05763	7	6.89328	581	64.7456	5.50342
Q6MGC4	H2-K region expressed gene 2, rat orthologue OS=Rattus norvegicus OX=10116 GN=Pfdn6 PE=1 SV=1 - [Q6MGC4_RAT]	223.543	37.8	1	7	7	12	0.916485	12	5.09501	0.940504	12	4.31462	1.02442	12	2.46383	1.03212	12	2.90762	1.02374	12	3.2111	1.05586	12	3.85102	1.02018	12	4.85643	1.02301	12	5.84075	0.911387	12	5.90916	127	14.4888	8.88037
Q8R3Z7	EH-domain-containing 4 OS=Rattus norvegicus OX=10116 GN=Ehd4 PE=1 SV=1 - [Q8R3Z7_RAT]	223.379	14.79	1	4	7	10	1.14015	7	4.38799	1.18094	7	2.73142	0.921814	7	3.06499	0.959947	7	3.07447	0.940212	7	4.1743	0.968441	7	2.29149	0.954063	7	1.90194	0.943936	7	1.28956	1.14679	7	5.47093	541	61.4285	6.75635
Q5XIP9	Transmembrane protein 43 OS=Rattus norvegicus OX=10116 GN=Tmem43 PE=2 SV=1 - [TMM43_RAT]	222.768	22.5	2	9	10	17	0.897252	16	6.09434	0.935706	16	6.82229	1.0537	16	5.11181	1.09779	16	4.3227	1.00031	16	6.3439	1.07596	16	3.84577	0.985744	16	6.38787	0.982156	16	7.19679	0.882043	16	8.5837	400	44.7461	7.35693
P62494	Ras-related protein Rab-11A OS=Rattus norvegicus OX=10116 GN=Rab11a PE=1 SV=3 - [RB11A_RAT]	222.341	39.35	5	9	9	13	1.0286	13	4.55363	1.04584	13	7.27194	0.997648	13	6.20368	0.982431	13	2.97857	0.979795	13	4.96142	1.01163	13	7.76684	1.00977	13	7.78483	0.999978	13	7.351	1.00953	13	11.324	216	24.3784	6.56592
Q4V8E2	26S proteasome regulatory subunit RPN11 OS=Rattus norvegicus OX=10116 GN=Psmd14 PE=1 SV=1 - [Q4V8E2_RAT]	222.066	18.06	1	8	8	13	0.965167	13	1.71889	0.987942	13	3.73819	1.01053	13	2.42012	1.03621	13	3.98918	0.994303	13	2.96172	1.03547	13	2.96295	0.987345	13	4.76313	1.01232	13	1.86372	0.962275	13	7.36075	310	34.5546	6.52197
D4A1S6	Protein phosphatase 1 regulatory subunit OS=Rattus norvegicus OX=10116 GN=Ppp1r12a PE=1 SV=3 - [D4A1S6_RAT]	221.383	12.81	33	11	14	16	0.904418	13	5.47978	0.951433	13	6.39127	1.02334	13	4.62948	1.03394	13	5.90088	1.02783	13	5.50328	1.01387	13	5.71409	1.0282	13	5.06095	1.01074	13	8.04112	0.923632	13	2.81653	976	109.638	5.40186
C9WPN6	Eukaryotic translation initiation factor 2 subunit 3, Y-linked OS=Rattus norvegicus OX=10116 GN=Eif2s3y PE=2 SV=2 - [IF2H_RAT]	220.829	23.94	13	1	12	19	0.930206	1		0.904744	1		1.02771	1		1.04663	1		1.03728	1		1.01101	1		1.03471	1		1.04498	1		0.933279	1		472	51.1213	8.39697
Q06647	ATP synthase subunit O, mitochondrial OS=Rattus norvegicus OX=10116 GN=Atp5po PE=1 SV=1 - [ATPO_RAT]	220.671	27.23	2	5	6	10	0.974204	9	8.19582	1.00933	9	5.3633	0.992346	9	5.31207	1.00069	9	2.15254	0.977926	9	3.81233	1.01404	9	5.98607	0.957318	9	4.00923	0.971303	9	4.2811	1.04104	9	3.79311	213	23.3828	10.0229
F1LN42	Tensin 1 OS=Rattus norvegicus OX=10116 GN=Tns1 PE=1 SV=2 - [F1LN42_RAT]	220.617	4.77	2	7	7	9	1.0274	9	5.99572	0.988795	9	1.68516	0.954855	9	5.05009	0.955551	9	1.2054	1.01487	9	4.50722	0.998073	9	4.67413	1.01215	9	6.92631	1.06368	9	3.41979	0.969335	9	9.58631	1909	203.784	7.76709
Q6PDU1	Serine/arginine-rich splicing factor 2 OS=Rattus norvegicus OX=10116 GN=Srsf2 PE=1 SV=3 - [SRSF2_RAT]	220.498	15.84	1	3	4	5	1.02728	4	7.19811	1.09191	4	4.68997	0.972022	4	3.41425	0.990459	4	4.34073	1.00151	4	6.62464	0.987654	4	4.39117	0.971103	4	4.87043	0.987551	4	3.84011	1.01904	4	5.32236	221	25.4612	11.854
P70490	Lactadherin OS=Rattus norvegicus OX=10116 GN=Mfge8 PE=2 SV=1 - [MFGM_RAT]	220.451	8.9	3	3	3	5	1.71558	5	13.3382	1.7702	5	14.4162	0.824797	5	11.6657	0.814022	5	4.95254	0.65916	5	5.1971	0.69365	5	8.72576	0.637163	5	13.712	0.668798	5	14.7996	1.81265	5	16.8744	427	47.382	7.09326
P17078	60S ribosomal protein L35 OS=Rattus norvegicus OX=10116 GN=Rpl35 PE=1 SV=3 - [RL35_RAT]	220.003	38.21	12	6	7	22	0.979191	18	7.66354	0.96685	18	7.47706	1.04124	18	4.24062	1.03751	18	4.66302	1.00973	18	6.29695	1.03315	18	3.63842	0.972826	18	7.77035	0.977428	18	4.46255	0.967912	18	8.69885	123	14.5436	11.0483
P62994	Growth factor receptor-bound protein 2 OS=Rattus norvegicus OX=10116 GN=Grb2 PE=1 SV=1 - [GRB2_RAT]	219.75	18.89	2	4	4	5	0.991516	5	5.15409	0.991788	5	7.95703	0.996361	5	5.84067	1.02159	5	1.67073	0.936775	5	3.52264	1.04427	5	6.0371	0.945017	5	3.63919	0.958545	5	6.65827	1.03519	5	7.95573	217	25.1904	6.31592
D3ZN59	Similar to High mobility group protein 2 (HMG-2) OS=Rattus norvegicus OX=10116 GN=RGD1559962 PE=3 SV=2 - [D3ZN59_RAT]	219.571	55.5	2	1	16	31	1.24512	2	9.65065	1.10323	2	7.88264	1.04533	2	0.619233	1.00675	2	7.02691	0.905716	2	14.2818	1.01322	2	14.6013	0.847225	2	3.48773	0.753225	2	11.8699	1.17093	2	9.58817	209	24.0017	6.59521
A0A0H2UHP9	RCG39700, isoform CRA_d OS=Rattus norvegicus OX=10116 GN=Rab6a PE=1 SV=1 - [A0A0H2UHP9_RAT]	219.461	27.88	16	5	6	10	1.04485	6	5.00682	1.0519	6	6.40657	0.988653	6	3.14405	0.970564	6	3.31485	0.998421	6	5.92732	0.984927	6	5.96383	0.998188	6	4.39763	1.02756	6	5.72704	1.00832	6	3.39837	208	23.5309	5.5415
A0A0G2K9N3	RNA helicase OS=Rattus norvegicus OX=10116 GN=Ddx3 PE=1 SV=1 - [A0A0G2K9N3_RAT]	218.84	10.28	3	1	7	12	0.98656	1		0.994394	1		1.04803	1		1.02245	1		0.952089	1		0.974736	1		0.989026	1		1.01375	1		1.04332	1		652	72.988	7.29834
D4ADF5	Programmed cell death 5 OS=Rattus norvegicus OX=10116 GN=Pdcd5 PE=1 SV=1 - [D4ADF5_RAT]	218.582	44	2	5	5	8	0.942831	8	5.53955	0.941624	8	6.26194	0.995235	8	6.39052	1.02012	8	5.72396	1.06403	8	13.4231	1.02065	8	5.97966	0.988405	8	10.3811	1.0369	8	4.90752	0.942302	8	12.3285	125	14.1953	5.68115
M0R785	Coiled-coil-helix-coiled-coil-helix domain-containing protein 2, mitochondrial-like OS=Rattus norvegicus OX=10116 GN=LOC100911516 PE=4 SV=1 - [M0R785_RAT]	217.975	24.68	4	3	3	5	0.920269	5	5.63126	0.875602	5	12.6961	1.03347	5	2.57145	1.00446	5	12.6289	1.05279	5	8.46687	1.04029	5	14.1682	1.05656	5	4.37199	1.08691	5	11.8845	1.01196	5	19.39	154	15.8389	9.33447
A0A0G2JUX5	Transcriptional activator protein Pur-beta OS=Rattus norvegicus OX=10116 GN=Purb PE=1 SV=1 - [A0A0G2JUX5_RAT]	217.543	26.81	14	8	10	12	1.0474	9	6.66088	1.01236	9	7.64774	0.97797	9	7.31187	0.958475	9	8.07919	1.03717	9	9.81182	0.966269	9	6.10154	1.01018	9	13.5955	1.01166	9	10.0544	0.955906	9	22.2712	317	33.5116	5.42725
P41542	General vesicular transport factor p115 OS=Rattus norvegicus OX=10116 GN=Uso1 PE=1 SV=1 - [USO1_RAT]	216.897	9.91	33	8	10	11	0.996429	9	1.82698	1.00234	9	3.19412	0.990284	9	1.90285	1.02059	9	4.52445	0.990219	9	2.92419	0.999803	9	2.60392	1.01046	9	2.47431	1.01355	9	7.5558	1.02994	9	2.79652	959	107.096	4.95752
A0A096MJ11	Gasdermin D OS=Rattus norvegicus OX=10116 GN=Gsdmd PE=1 SV=1 - [A0A096MJ11_RAT]	216.442	16.19	1	9	9	10	0.951185	10	3.89021	0.943593	10	4.26993	1.04307	10	4.07255	1.04368	10	3.75172	0.982575	10	5.86386	1.03989	10	6.38558	1.0015	10	3.22606	1.00408	10	3.46947	0.952747	10	11.4023	488	53.1791	4.93213
A0A0H2UHZ6	60 kDa poly(U)-binding-splicing factor OS=Rattus norvegicus OX=10116 GN=Puf60 PE=1 SV=1 - [A0A0H2UHZ6_RAT]	216.284	12.08	2	7	7	11	1.07174	11	4.81284	1.07205	11	5.90738	0.965937	11	1.83916	0.962826	11	2.77902	0.974251	11	4.86066	0.98414	11	3.99075	0.97055	11	5.8219	0.979064	11	4.85388	1.06352	11	3.0413	563	60.0827	5.2876
Q4FZT0	Stomatin-like protein 2, mitochondrial OS=Rattus norvegicus OX=10116 GN=Stoml2 PE=1 SV=1 - [STML2_RAT]	216.278	11.61	1	3	3	5	0.932476	5	12.9947	0.895291	5	4.33212	1.02295	5	0.949775	1.06014	5	2.02599	1.03729	5	2.62765	0.993211	5	10.8462	1.0146	5	7.42624	1.05312	5	4.52766	0.905252	5	10.0711	353	38.3902	8.63135
P0DMW0	Heat shock 70 kDa protein 1A OS=Rattus norvegicus OX=10116 GN=Hspa1a PE=2 SV=1 - [HS71A_RAT]	215.662	8.58	1	1	6	11	1.00364	1		1.03972	1		0.910973	1		0.990749	1		0.94954	1		0.979665	1		0.876402	1		0.960617	1		1.43018	1		641	70.1421	5.8208
P55063	Heat shock 70 kDa protein 1-like OS=Rattus norvegicus OX=10116 GN=Hspa1l PE=2 SV=2 - [HS71L_RAT]	215.662	9.05	1	1	6	11	0.962179	1		0.961511	1		1.0026	1		1.0059	1		1.1021	1		0.96802	1		1.04664	1		1.01554	1		0.952757	1		641	70.5052	6.23975
P60123	RuvB-like 1 OS=Rattus norvegicus OX=10116 GN=Ruvbl1 PE=1 SV=1 - [RUVB1_RAT]	215.649	19.08	3	8	8	9	0.986794	9	4.55797	0.97359	9	5.75313	1.01767	9	2.26888	1.04036	9	4.49222	1.00602	9	4.89877	1.02177	9	4.68427	1.00142	9	3.68438	0.974391	9	2.10449	0.979589	9	5.23303	456	50.1823	6.41748
P62634	Cellular nucleic acid-binding protein OS=Rattus norvegicus OX=10116 GN=Cnbp PE=2 SV=1 - [CNBP_RAT]	214.982	28.25	1	5	5	8	1.28961	8	10.6501	1.24126	8	19.0205	0.903954	8	10.3141	0.89924	8	1.31612	0.866236	8	8.26526	0.968114	8	6.6704	0.87361	8	16.5376	0.800063	8	15.0318	1.26236	8	10.3318	177	19.4496	7.7085
Q01986	Dual specificity mitogen-activated protein kinase kinase 1 OS=Rattus norvegicus OX=10116 GN=Map2k1 PE=1 SV=2 - [MP2K1_RAT]	214.929	22.65	2	6	7	11	0.843413	10	3.25567	0.843695	10	2.86788	1.08305	10	4.17049	1.11989	10	3.05118	1.02548	10	1.62031	1.09514	10	2.25369	1.02383	10	2.08816	1.00238	10	5.60433	0.840314	10	9.15443	393	43.4374	6.62451
A9CMB8	DNA helicase OS=Rattus norvegicus OX=10116 GN=Mcm6 PE=1 SV=1 - [A9CMB8_RAT]	214.842	9.26	3	7	7	9	1.51894	9	8.26901	1.51103	9	5.26988	0.823365	9	8.30613	0.834515	9	3.42258	0.794767	9	8.99277	0.825316	9	14.4656	0.770138	9	4.5377	0.768668	9	6.369	1.6295	9	3.87333	821	92.757	5.42725
C6L8E0	Drebrin E OS=Rattus norvegicus OX=10116 GN=Dbn1 PE=2 SV=1 - [C6L8E0_RAT]	214.839	16.94	3	7	7	8	0.977469	8	2.06582	1.00154	8	10.5954	1.00997	8	4.58667	0.996275	8	2.04936	0.983044	8	7.2947	1.01161	8	7.722	1.01491	8	7.52493	1.03223	8	7.32455	1.0162	8	7.08267	661	72.5569	4.44971
P52555	Endoplasmic reticulum resident protein 29 OS=Rattus norvegicus OX=10116 GN=Erp29 PE=1 SV=2 - [ERP29_RAT]	214.395	32.31	6	9	9	12	1.11293	11	12.8009	1.14514	11	16.2242	0.934867	11	6.57394	0.956119	11	2.17508	0.980229	11	8.93345	0.927616	11	4.82461	0.949972	11	11.817	0.973989	11	6.56814	1.08669	11	17.5728	260	28.5569	6.62451
Q6AY18	Inorganic pyrophosphatase 1 OS=Rattus norvegicus OX=10116 GN=Sar1a PE=1 SV=1 - [Q6AY18_RAT]	213.885	14.14	1	2	3	9	1.01646	5	10.9749	0.974542	5	1.33735	0.983107	5	9.92816	1.00855	5	6.52505	0.939832	5	5.61438	1.07822	5	3.31755	0.920898	5	6.68527	0.970802	5	8.85655	1.09617	5	6.00981	198	22.3845	6.68311
P22509	rRNA 2'-O-methyltransferase fibrillarin OS=Rattus norvegicus OX=10116 GN=Fbl PE=1 SV=2 - [FBRL_RAT]	213.671	27.22	2	8	8	15	0.863499	15	3.31306	0.866366	15	6.65099	1.05656	15	2.16396	1.08915	15	4.25741	1.01054	15	5.42522	1.08366	15	5.03431	1.01753	15	5.74794	1.0441	15	4.23964	0.85805	15	3.06512	327	34.2006	10.2427
A0A0G2JT93	Catenin (Cadherin associated protein), beta 1, isoform CRA_a OS=Rattus norvegicus OX=10116 GN=Ctnnb1 PE=1 SV=1 - [A0A0G2JT93_RAT]	213.422	8.07	2	6	6	9	1.31088	9	6.44122	1.25594	9	14.0795	0.918677	9	8.73288	0.887436	9	3.19663	0.88402	9	12.0732	0.903132	9	2.74907	0.869769	9	6.54078	0.975166	9	14.0708	1.14713	9	20.2853	781	85.4162	5.85889
P12007	Isovaleryl-CoA dehydrogenase, mitochondrial OS=Rattus norvegicus OX=10116 GN=Ivd PE=1 SV=2 - [IVD_RAT]	213.229	11.08	1	4	5	8	0.969417	6	1.33132	0.957852	6	3.30585	1.026	6	2.19064	1.04179	6	3.9496	0.993819	6	1.86795	1.04468	6	3.15218	0.980105	6	2.00451	0.972563	6	1.94559	0.983089	6	2.83359	424	46.4058	7.89893
F1LQT3	Rho-associated protein kinase OS=Rattus norvegicus OX=10116 GN=Rock2 PE=1 SV=3 - [F1LQT3_RAT]	212.956	10.81	3	11	14	17	1.06571	13	4.12038	1.05804	13	4.98075	0.964466	13	3.23054	0.98863	13	5.67134	0.955076	13	5.3956	0.999112	13	3.18117	0.962706	13	8.10878	1.00781	13	5.60487	1.09567	13	7.50285	1378	159.343	5.88428
P36972	Adenine phosphoribosyltransferase OS=Rattus norvegicus OX=10116 GN=Aprt PE=1 SV=1 - [APT_RAT]	212.039	26.67	1	6	6	8	0.856681	8	6.31041	0.884687	8	10.6917	1.0561	8	4.43771	1.09756	8	3.49997	1.00387	8	4.22562	1.1632	8	7.57958	0.975529	8	11.0186	1.00348	8	4.8422	0.937115	8	12.98	180	19.5334	6.56592
G3V8F5	Mitochondrial import receptor subunit TOM40 homolog OS=Rattus norvegicus OX=10116 GN=Tomm40 PE=1 SV=1 - [G3V8F5_RAT]	211.975	16.07	2	5	5	8	0.959112	8	7.14996	0.91889	8	6.38732	0.989232	8	5.37595	1.04253	8	7.77814	1.00448	8	3.58494	1.06879	8	2.67139	0.977761	8	1.6102	1.0225	8	5.41021	0.966241	8	9.67286	361	37.8961	7.97217
Q1PS21	DNA replication licensing factor MCM7 OS=Rattus norvegicus OX=10116 GN=Mcm7 PE=2 SV=1 - [Q1PS21_RAT]	211.439	10.85	2	6	6	10	1.34747	10	12.1724	1.41911	10	12.3422	0.85762	10	4.37435	0.864116	10	5.22341	0.862228	10	10.8793	0.854409	10	6.99948	0.877238	10	9.13241	0.836834	10	6.82451	1.42654	10	7.18155	719	81.0375	6.25244
Q5M823	NudC domain-containing protein 2 OS=Rattus norvegicus OX=10116 GN=Nudcd2 PE=2 SV=1 - [NUDC2_RAT]	211.287	30.57	1	4	4	6	0.937906	6	8.56892	0.960217	6	1.69117	0.992919	6	3.25921	1.03762	6	2.74782	1.00267	6	2.38698	1.00841	6	5.29813	1.01296	6	5.47088	1.02332	6	4.33357	0.993371	6	1.90777	157	17.6628	5.07178
B0K031	60S ribosomal protein L7 OS=Rattus norvegicus OX=10116 GN=Rpl7 PE=1 SV=1 - [B0K031_RAT]	211.2	35.77	10	14	14	29	0.97477	27	9.10706	0.970693	27	7.45659	1.02549	27	9.00066	1.04621	27	4.35629	0.979987	27	7.41397	1.04837	27	5.25323	0.961915	27	6.93913	0.962528	27	3.42148	1.00466	27	11.2677	260	30.294	10.8726
P62890	60S ribosomal protein L30 OS=Rattus norvegicus OX=10116 GN=Rpl30 PE=3 SV=2 - [RL30_RAT]	210.977	40.87	5	4	6	14	0.991167	6	3.99785	0.954094	6	4.63679	0.98653	6	6.97623	1.0139	6	3.28971	1.07239	6	7.5299	1.00756	6	6.1494	1.03781	6	6.46572	1.06521	6	3.78132	0.968431	6	3.04217	115	12.7757	9.62744
Q5BJP4	RNA binding motif protein 39 OS=Rattus norvegicus OX=10116 GN=Rbm39 PE=1 SV=1 - [Q5BJP4_RAT]	210.736	8.59	1	4	4	8	0.97971	8	8.32086	0.93669	8	9.71696	1.04672	8	4.35938	0.957159	8	5.75601	1.06687	8	6.02676	0.959907	8	3.33455	1.04813	8	3.19768	1.07942	8	2.3206	0.942415	8	5.02385	524	58.6473	10.1255
E9PT66	Splicing factor 3b, subunit 3 OS=Rattus norvegicus OX=10116 GN=Sf3b3 PE=1 SV=2 - [E9PT66_RAT]	210.638	10.44	2	11	11	11	1.08475	11	5.96892	1.0693	11	4.20321	0.98183	11	4.28882	0.992279	11	1.97681	0.952695	11	7.28138	0.988058	11	5.36002	1.00124	11	8.90493	0.950319	11	3.422	1.05319	11	5.46838	1217	135.465	5.26221
Q6P7P5	Basic leucine zipper and W2 domain-containing protein 1 OS=Rattus norvegicus OX=10116 GN=Bzw1 PE=1 SV=1 - [BZW1_RAT]	210.52	12.41	1	5	7	13	1.01486	6	6.73727	1.07302	6	12.7878	0.997381	6	5.68282	0.961383	6	5.26696	0.995859	6	3.23664	0.974475	6	1.13678	1.03647	6	8.61369	0.969684	6	4.20977	1.06415	6	4.71408	419	48.0127	5.92236
D3ZUC9	Non-specific serine/threonine protein kinase OS=Rattus norvegicus OX=10116 GN=Oxsr1 PE=1 SV=1 - [D3ZUC9_RAT]	210.081	11.01	7	5	5	7	0.983328	7	7.59329	1.07663	7	1.34003	1.02239	7	2.30264	1.03808	7	2.76959	0.925822	7	5.9873	1.02004	7	3.96061	0.956131	7	1.76934	0.9693	7	3.35204	1.00667	7	11.4086	527	58.1681	6.56592
Q3B8Q1	Nucleolar RNA helicase 2 OS=Rattus norvegicus OX=10116 GN=Ddx21 PE=2 SV=1 - [DDX21_RAT]	209.864	16.37	5	11	12	14	0.952049	12	9.05244	0.992577	12	6.61129	1.01853	12	5.58904	0.999996	12	4.0786	1.03705	12	4.71919	1.01535	12	2.80726	0.994546	12	9.82306	1.0019	12	4.37237	0.964918	12	8.04489	782	85.9126	9.33447
A0A0G2K2Y3	Aminopeptidase OS=Rattus norvegicus OX=10116 GN=Erap1 PE=1 SV=1 - [A0A0G2K2Y3_RAT]	209.623	8.26	3	7	7	10	1.04346	10	9.47838	1.06058	10	4.38718	1.02255	10	7.67443	1.01644	10	3.7944	0.951362	10	8.92062	0.999544	10	9.77697	0.955802	10	7.46548	0.944698	10	5.73602	1.02375	10	13.7803	884	100.681	6.37939
Q6PCT9	26S proteasome non-ATPase regulatory subunit 6 OS=Rattus norvegicus OX=10116 GN=Psmd6 PE=1 SV=1 - [Q6PCT9_RAT]	209.3	25.96	2	10	11	13	1.03225	12	12.2794	1.0018	12	5.83285	1.00047	12	2.41273	1.03236	12	2.90772	0.975686	12	10.3258	1.04133	12	5.56128	0.973718	12	7.71599	0.986297	12	8.44003	1.03041	12	14.3349	389	45.5692	5.51611
A0A0G2JXC1	Protein ERGIC-53 OS=Rattus norvegicus OX=10116 GN=Lman1 PE=1 SV=1 - [A0A0G2JXC1_RAT]	208.855	15.67	5	7	9	15	0.989384	10	14.6237	0.938603	10	9.56654	1.00505	10	1.76866	1.00068	10	4.4447	1.01318	10	8.18606	1.01428	10	4.34435	1.01162	10	4.64494	1.01614	10	5.85932	0.992039	10	14.816	517	58.059	6.49365
Q9EQX9	Ubiquitin-conjugating enzyme E2 N OS=Rattus norvegicus OX=10116 GN=Ube2n PE=1 SV=1 - [UBE2N_RAT]	208.75	44.08	2	7	7	10	1.06427	10	10.6109	1.04242	10	6.21954	0.9881	10	3.73947	0.963876	10	5.84694	1.00197	10	6.85653	0.976181	10	5.43572	0.943399	10	9.69904	0.980006	10	7.83672	1.06942	10	9.83655	152	17.113	6.56592
Q6DGF2	Clathrin interactor 1 OS=Rattus norvegicus OX=10116 GN=Clint1 PE=1 SV=1 - [Q6DGF2_RAT]	208.631	10.81	2	4	4	5	0.963648	5	6.79799	0.982253	5	6.46537	0.965526	5	2.40505	1.00255	5	2.12387	0.971791	5	2.40401	1.08958	5	5.31613	0.977683	5	1.117	1.02907	5	5.79148	1.02	5	5.14694	472	52.1075	6.25244
Q99NA5	Isocitrate dehydrogenase [NAD] subunit alpha, mitochondrial OS=Rattus norvegicus OX=10116 GN=Idh3a PE=1 SV=1 - [IDH3A_RAT]	208.16	22.68	2	9	9	12	0.934706	12	7.16549	0.96966	12	12.5298	1.03421	12	3.52044	1.00881	12	8.6884	1.01606	12	10.0941	1.01622	12	7.59996	1.00676	12	14.9492	1.02778	12	13.7319	0.934248	12	10.1598	366	39.588	6.91748
Q8R4A1	ERO1-like protein alpha OS=Rattus norvegicus OX=10116 GN=Ero1a PE=1 SV=1 - [ERO1A_RAT]	207.842	13.79	2	6	6	8	0.832005	8	7.13162	0.802396	8	5.57064	1.0733	8	5.27017	1.07265	8	3.49781	1.07259	8	3.52201	1.09294	8	9.10654	1.07437	8	7.88263	1.05175	8	4.58187	0.831817	8	8.76585	464	53.984	6.18896
Q8K1Q0	Glycylpeptide N-tetradecanoyltransferase 1 OS=Rattus norvegicus OX=10116 GN=Nmt1 PE=1 SV=1 - [NMT1_RAT]	207.733	11.29	3	4	5	9	0.997028	8	1.91678	1.03422	8	5.98335	0.983959	8	4.32135	0.973275	8	7.57237	0.984805	8	4.93263	0.999684	8	4.79342	0.968822	8	5.08196	1.00187	8	6.11619	1.0337	8	12.623	496	56.824	7.98682
B2GV06	Succinyl-CoA:3-ketoacid coenzyme A transferase 1, mitochondrial OS=Rattus norvegicus OX=10116 GN=Oxct1 PE=1 SV=1 - [SCOT1_RAT]	207.728	13.65	9	6	7	8	1.02794	7	4.08848	0.995535	7	4.1884	1.0152	7	2.33803	1.00511	7	3.93381	0.996345	7	8.34639	0.984989	7	2.26475	1.05373	7	6.50443	0.973148	7	4.36779	1.03611	7	4.02631	520	56.1681	8.47021
D3ZN27	DnaJ heat shock protein family (Hsp40) member C13 OS=Rattus norvegicus OX=10116 GN=Dnajc13 PE=1 SV=2 - [D3ZN27_RAT]	207.712	4.06	1	6	8	9	1.00086	6	6.28489	0.999711	6	9.30524	0.998231	6	7.00131	1.00932	6	2.10347	0.957779	6	5.83725	1.00506	6	6.84541	1.01366	6	8.68506	0.975127	6	5.76073	1.06382	6	6.14609	2243	254.346	6.771
Q4KM41	Ewing sarcoma breakpoint region 1 OS=Rattus norvegicus OX=10116 GN=Ewsr1 PE=2 SV=1 - [Q4KM41_RAT]	207.663	23.03	4	7	7	13	1.05068	13	3.98536	1.02115	13	10.3709	0.975015	13	6.3409	0.96755	13	5.82706	0.992576	13	7.35399	0.971554	13	4.26308	1.02001	13	9.83464	1.01951	13	8.8919	1.05939	13	9.36637	317	33.054	9.90576
P21571	ATP synthase-coupling factor 6, mitochondrial OS=Rattus norvegicus OX=10116 GN=Atp5pf PE=1 SV=1 - [ATP5J_RAT]	207.4	50	1	6	6	8	0.947996	8	6.69087	0.960395	8	7.26538	0.99643	8	6.87344	1.01878	8	3.11729	1.01881	8	3.9341	1.0279	8	5.72284	1.0362	8	3.08444	1.0156	8	3.10382	0.955173	8	6.62295	108	12.4866	9.43701
D4AC36	Eukaryotic translation initiation factor 3 subunit F OS=Rattus norvegicus OX=10116 GN=Eif3f PE=1 SV=3 - [D4AC36_RAT]	206.726	11.36	1	4	4	6	0.988642	6	7.44191	0.951112	6	8.00866	1.03121	6	0.584937	1.00201	6	1.48226	1.02728	6	0.937531	1.00349	6	4.53981	1.02902	6	1.48898	1.03047	6	4.53294	0.963159	6	12.0914	361	37.9733	5.45264
Q9EPX0	Heat shock protein beta-8 OS=Rattus norvegicus OX=10116 GN=Hspb8 PE=1 SV=1 - [HSPB8_RAT]	206.715	22.96	1	5	5	11	0.883616	11	3.63605	0.894601	11	5.60545	1.01093	11	3.70377	1.01823	11	3.00782	1.10673	11	2.50564	1.02393	11	3.6984	1.06286	11	5.43394	1.07658	11	3.30269	0.883776	11	4.66241	196	21.5787	5.021
Q6MG61	Chloride intracellular channel protein 1 OS=Rattus norvegicus OX=10116 GN=Clic1 PE=1 SV=1 - [CLIC1_RAT]	206.559	24.07	3	6	7	15	1.11376	12	7.47192	1.10878	12	10.5465	0.979456	12	8.1943	0.975492	12	3.77552	0.946669	12	11.5435	0.961838	12	6.38003	0.953345	12	16.5545	0.908488	12	12.8787	1.10588	12	19.5594	241	26.9638	5.17334
Q3T1L0	Aldehyde dehydrogenase family 16 member A1 OS=Rattus norvegicus OX=10116 GN=Aldh16a1 PE=2 SV=1 - [A16A1_RAT]	206.465	5.24	1	3	3	5	0.952432	5	12.5043	1.01746	5	13.1109	1.00769	5	5.49668	0.97273	5	2.68958	1.0238	5	13.4896	1.01872	5	5.67633	1.02628	5	14.1337	1.00178	5	9.9994	0.922521	5	22.258	802	85.3607	6.15088
P49432	Pyruvate dehydrogenase E1 component subunit beta, mitochondrial OS=Rattus norvegicus OX=10116 GN=Pdhb PE=1 SV=2 - [ODPB_RAT]	205.198	14.76	2	5	5	7	1.01897	7	3.98971	1.0207	7	2.17171	0.995412	7	1.09536	1.03906	7	3.86599	0.968996	7	2.85743	1.04079	7	1.9524	0.957686	7	4.35849	0.96095	7	3.27873	1.00324	7	4.51909	359	38.957	6.65381
Q5I0E7	Transmembrane emp24 domain-containing protein 9 OS=Rattus norvegicus OX=10116 GN=Tmed9 PE=1 SV=1 - [TMED9_RAT]	205.17	25.53	10	4	6	8	0.984575	6	8.0684	0.98396	6	7.74988	0.982583	6	5.57123	1.02004	6	2.44265	1.00687	6	9.72938	0.985322	6	3.90576	0.992667	6	3.84014	1.03871	6	9.14968	1.00645	6	8.01362	235	27.011	8.26514
B2RZB5	Charged multivesicular body protein 2A OS=Rattus norvegicus OX=10116 GN=Chmp2a PE=1 SV=1 - [B2RZB5_RAT]	204.891	17.57	9	3	4	6	1.02187	5	7.10212	1.02246	5	10.9677	1.02787	5	2.49272	0.999614	5	3.6214	0.98098	5	2.31188	1.03685	5	3.41129	0.994522	5	5.89221	0.969995	5	4.25383	0.963345	5	1.51605	222	25.1179	5.97314
Q712J3	BICD cargo adaptor 2 OS=Rattus norvegicus OX=10116 GN=Bicd2 PE=1 SV=1 - [Q712J3_RAT]	204.734	6.83	3	5	5	5	1.07881	5	13.1693	1.08157	5	3.87932	0.966387	5	1.35482	0.971766	5	2.54153	1.0048	5	3.35509	0.945327	5	5.88283	1.01399	5	3.86506	1.01383	5	2.13797	1.03737	5	2.0722	820	93.3659	5.33838
G3V6H5	Mitochondrial 2-oxoglutarate/malate carrier protein OS=Rattus norvegicus OX=10116 GN=Slc25a11 PE=1 SV=1 - [G3V6H5_RAT]	204.68	17.2	2	5	5	6	0.901425	6	6.95241	0.958265	6	7.30332	1.02226	6	3.05523	1.0186	6	3.05645	1.05042	6	7.02197	1.02596	6	5.92001	1.01856	6	11.8156	0.987315	6	9.69878	0.990759	6	10.761	314	34.1149	9.96436
E9PU01	DNA helicase OS=Rattus norvegicus OX=10116 GN=Chd4 PE=1 SV=3 - [E9PU01_RAT]	204.193	6.77	61	11	13	17	1.07663	15	5.07697	1.09025	15	8.15912	0.974964	15	8.47347	0.941539	15	3.94721	1.01939	15	3.799	0.940096	15	5.68003	1.00077	15	4.14276	0.986915	15	5.65859	1.04198	15	7.78626	1921	218.046	5.80811
A0A140TAI6	60S ribosomal protein L36 OS=Rattus norvegicus OX=10116 GN=Rpl36 PE=3 SV=1 - [A0A140TAI6_RAT]	203.953	46.67	10	6	7	9	1.01329	8	6.13073	0.96118	8	7.64874	1.00562	8	5.77518	1.00794	8	8.15539	1.05053	8	14.3925	1.00236	8	5.29798	1.00637	8	5.89977	1.01814	8	8.14235	0.975178	8	13.1787	105	12.2459	11.5903
G3V9I0	Procollagen-lysine 5-dioxygenase OS=Rattus norvegicus OX=10116 GN=Plod2 PE=4 SV=1 - [G3V9I0_RAT]	203.386	18.05	4	12	13	16	1.18244	15	5.3001	1.11322	15	10.7955	0.94123	15	6.95018	0.967215	15	4.79029	0.955624	15	6.17565	0.95871	15	6.74675	0.937156	15	13.3604	0.948446	15	7.06515	1.12371	15	12.1403	737	84.5446	6.65381
D4AEP0	Adenylosuccinate synthetase isozyme 2 OS=Rattus norvegicus OX=10116 GN=Adss PE=1 SV=1 - [D4AEP0_RAT]	202.469	13.38	1	4	4	5	0.978229	5	8.47805	0.945833	5	10.7364	1.01366	5	1.96977	1.0081	5	2.52518	1.05302	5	2.25258	1.02375	5	3.06427	1.01999	5	5.16166	1.04506	5	3.36498	0.920097	5	9.90385	456	50.0537	6.37939
P19511	ATP synthase F(0) complex subunit B1, mitochondrial OS=Rattus norvegicus OX=10116 GN=Atp5pb PE=1 SV=1 - [AT5F1_RAT]	201.976	24.61	3	9	10	15	0.97609	14	2.72039	0.976424	14	3.59698	1.01214	14	3.058	1.03861	14	3.27292	0.998844	14	2.22941	1.01863	14	6.24266	1.01707	14	3.75337	0.992445	14	7.04317	0.965784	14	7.59002	256	28.8505	9.36377
Q6PDV7	60S ribosomal protein L10 OS=Rattus norvegicus OX=10116 GN=Rpl10 PE=1 SV=3 - [RL10_RAT]	201.906	40.65	2	10	10	17	0.959264	17	8.3524	1.00202	17	9.28315	1.00764	17	3.30724	1.02202	17	3.85082	1.01561	17	9.42417	1.00677	17	5.23194	0.976281	17	10.5515	1.01873	17	7.70563	0.980507	17	10.961	214	24.5879	10.0815
E9PSJ4	Sperm-associated antigen 9 OS=Rattus norvegicus OX=10116 GN=Spag9 PE=1 SV=2 - [E9PSJ4_RAT]	201.861	4.92	12	4	7	13	0.998769	8	5.91446	0.977811	8	7.89427	1.00271	8	2.529	0.988636	8	5.25542	0.995588	8	8.80211	1.00653	8	8.25432	1.05784	8	11.358	1.06871	8	6.98303	0.970685	8	9.76609	1320	145.916	5.19873
D4A0Y6	Marker of proliferation Ki-67 OS=Rattus norvegicus OX=10116 GN=Mki67 PE=1 SV=2 - [D4A0Y6_RAT]	201.749	4.87	1	5	5	6	1.0228	6	4.57113	1.02497	6	8.17286	0.977722	6	4.98712	0.94184	6	3.32764	1.02553	6	0.877089	0.988018	6	2.37219	1.03029	6	2.42174	0.982036	6	6.36196	1.01715	6	4.48051	3119	343.142	9.74463
Q27W01	RNA-binding protein 8A OS=Rattus norvegicus OX=10116 GN=Rbm8a PE=1 SV=1 - [RBM8A_RAT]	201.667	22.99	1	4	5	8	1.01742	7	5.09438	0.965374	7	4.84394	1.02643	7	2.19281	0.96829	7	4.4338	1.06619	7	7.0531	0.927562	7	9.32468	1.05028	7	10.532	0.995624	7	7.91615	0.963915	7	4.68659	174	19.8767	5.71924
P83941	Elongin-C OS=Rattus norvegicus OX=10116 GN=Eloc PE=1 SV=1 - [ELOC_RAT]	201.061	30.36	2	2	2	4	0.998118	4	3.71621	1.04296	4	2.42429	0.943258	4	0.944331	1.00835	4	0.81859	0.988604	4	6.32997	0.99391	4	0.233255	0.993113	4	3.88747	1.01077	4	5.65314	1.09876	4	3.84386	112	12.465	4.77979
A0A0G2K7W6	60S ribosomal protein L27a OS=Rattus norvegicus OX=10116 GN=RGD1562402 PE=3 SV=1 - [A0A0G2K7W6_RAT]	200.904	33.11	10	6	6	11	0.916966	10	4.5597	0.987057	10	4.83563	1.07349	10	5.27616	0.989237	10	3.51971	1.02703	10	4.0624	0.978823	10	8.63956	1.05728	10	6.21116	1.00855	10	3.59533	0.826962	10	11.4424	148	16.5771	10.9897
B4F7E8	Protein Niban 2 OS=Rattus norvegicus OX=10116 GN=Niban2 PE=1 SV=1 - [NIBA2_RAT]	200.695	14.73	2	10	10	14	0.989809	14	4.98472	1.03052	14	6.43675	1.01684	14	2.89066	1.00663	14	4.09861	0.954826	14	7.7731	1.03358	14	6.46003	0.956931	14	6.09143	0.956112	14	5.09237	1.05824	14	3.40573	747	84.6771	5.94775
B2RYQ5	Enhancer of rudimentary homolog OS=Rattus norvegicus OX=10116 GN=Erh PE=1 SV=1 - [B2RYQ5_RAT]	200.611	28.85	2	3	3	8	1.26528	8	7.76876	1.14413	8	8.07094	0.971607	8	3.16225	1.05605	8	2.2218	0.837655	8	14.5533	0.99643	8	13.2659	0.778348	8	13.2499	0.802452	8	11.3866	1.26664	8	5.34939	104	12.251	5.92236
Q156J1	Bcl-2-interacting death suppressor OS=Rattus norvegicus OX=10116 PE=2 SV=1 - [Q156J1_RAT]	200.201	22.13	3	1	11	15	1.09647	1		1.0505	1		0.969933	1		1.0932	1		0.910169	1		0.937056	1		0.905594	1		0.980929	1		1.14149	1		574	61.4871	7.00537
P11030	Acyl-CoA-binding protein OS=Rattus norvegicus OX=10116 GN=Dbi PE=1 SV=3 - [ACBP_RAT]	199.792	52.87	13	6	7	19	1.13346	18	6.23517	1.11655	18	4.78308	0.945665	18	2.97502	0.950304	18	4.35327	1.00968	18	4.03512	0.923143	18	5.80824	0.9745	18	6.33913	0.977029	18	6.41969	1.07411	18	7.07894	87	10.0212	8.82178
B2GV01	Metastasis-associated 1 family, member 2 OS=Rattus norvegicus OX=10116 GN=Mta2 PE=1 SV=1 - [B2GV01_RAT]	199.743	10.78	4	6	7	8	1.06194	7	5.45405	1.02175	7	4.67775	0.965486	7	1.77167	0.989858	7	2.62664	0.979272	7	3.35031	0.97243	7	1.43762	0.95698	7	3.93238	1.00394	7	3.21878	1.06555	7	9.21564	668	74.9126	9.67139
Q6AYD5	Eukaryotic peptide chain release factor GTP-binding subunit ERF3B-like OS=Rattus norvegicus OX=10116 GN=Gspt1 PE=1 SV=1 - [Q6AYD5_RAT]	199.45	15.57	2	12	12	16	0.947136	16	8.18498	0.919604	16	7.17551	1.04335	16	4.19723	1.03005	16	4.49559	1.03641	16	5.48082	1.04291	16	7.60133	0.998696	16	7.72173	1.03153	16	6.02192	0.907639	16	8.8001	636	68.7081	5.21143
F1LPH1	Calpain inhibitor OS=Rattus norvegicus OX=10116 GN=Cast PE=1 SV=1 - [F1LPH1_RAT]	199.397	18.65	14	10	12	15	0.945028	13	8.14641	1.01156	13	7.92824	1.01895	13	3.38506	0.997922	13	4.51846	0.982049	13	7.77007	1.05115	13	2.04292	0.976429	13	7.49911	0.943203	13	7.96354	0.990155	13	9.12613	713	77.2499	5.19873
Q641Y8	ATP-dependent RNA helicase DDX1 OS=Rattus norvegicus OX=10116 GN=Ddx1 PE=1 SV=1 - [DDX1_RAT]	199.335	13.78	3	11	11	11	1.03334	11	4.21958	0.998292	11	3.73773	1.03183	11	3.20733	1.01834	11	3.3535	0.993494	11	2.7234	0.98892	11	1.99161	0.980235	11	3.13361	1.00139	11	4.49184	0.996348	11	10.9617	740	82.4448	7.2251
B2RZ37	Receptor expression-enhancing protein 5 OS=Rattus norvegicus OX=10116 GN=Reep5 PE=1 SV=1 - [REEP5_RAT]	199.234	17.99	2	5	5	7	1.06987	7	6.71018	1.05943	7	3.33654	1.00335	7	2.77802	0.999346	7	4.56392	0.97273	7	4.40705	0.969685	7	5.9361	0.944777	7	5.68741	0.96718	7	6.93092	1.0694	7	2.37753	189	21.417	8.11865
D3ZWE0	Histone H2A OS=Rattus norvegicus OX=10116 GN=Hist2h2ab PE=3 SV=1 - [D3ZWE0_RAT]	199.229	27.69	1	1	6	20	0.762397	2	14.0633	0.742349	2	13.853	1.20525	2	4.7601	1.01086	2	8.06713	1.1585	2	2.98401	0.962974	2	17.3325	1.24413	2	6.70839	1.06195	2	14.584	0.665409	2	18.7069	130	13.9908	10.8872
Q80WE1	Synaptic functional regulator FMR1 OS=Rattus norvegicus OX=10116 GN=Fmr1 PE=1 SV=2 - [FMR1_RAT]	198.72	7.76	5	2	4	8	1.06662	4	14.3998	0.987873	4	28.9755	1.00494	4	12.1847	1.01487	4	1.8368	0.993582	4	17.5299	0.965868	4	2.47618	0.990045	4	13.6354	0.997886	4	13.2157	0.974827	4	25.9837	593	66.7396	7.2251
A0A0G2JVK4	Neurolysin, mitochondrial OS=Rattus norvegicus OX=10116 GN=Nln PE=1 SV=1 - [A0A0G2JVK4_RAT]	198.431	8.81	4	6	7	9	1.07573	8	7.17363	1.05104	8	7.18917	0.979462	8	2.4959	0.962112	8	6.32932	1.00997	8	9.15663	0.990548	8	5.41867	1.01775	8	9.00571	1.00341	8	6.70397	0.994402	8	9.93264	681	77.7521	6.20166
D4A054	RAN-binding protein 2 OS=Rattus norvegicus OX=10116 GN=Ranbp2 PE=1 SV=2 - [D4A054_RAT]	198.367	4.48	13	9	12	13	0.980538	9	2.26268	0.976616	9	7.54898	0.994609	9	3.57393	1.02278	9	6.23196	0.999711	9	6.15466	1.01626	9	7.27123	1.02063	9	9.61278	0.997373	9	3.52289	1.01772	9	8.69449	3059	341.188	5.98584
A0A0H2UHT6	40S ribosomal protein S18 OS=Rattus norvegicus OX=10116 GN=Rps18 PE=1 SV=1 - [A0A0H2UHT6_RAT]	198.358	47.68	20	7	10	18	0.977506	13	5.57078	0.994093	13	4.28374	1.01737	13	6.18444	0.988929	13	7.52091	1.04457	13	4.0586	0.972336	13	3.7713	1.00253	13	8.59581	1.00274	13	10.109	0.991343	13	7.54438	151	17.5768	10.9897
P18395	Cold shock domain-containing protein E1 OS=Rattus norvegicus OX=10116 GN=Csde1 PE=2 SV=1 - [CSDE1_RAT]	197.61	9.52	1	7	7	7	1.0939	7	4.19741	1.0787	7	8.86132	0.95388	7	1.37724	0.940495	7	3.20181	0.973836	7	6.14053	0.985866	7	6.57986	0.974975	7	11.3968	0.985688	7	8.57048	1.06654	7	9.3098	798	88.8389	6.3667
F1LYS7	Sarcoglycan, delta OS=Rattus norvegicus OX=10116 GN=Sgcd PE=3 SV=3 - [F1LYS7_RAT]	197.606	5.54	1	1	1	2	1.14654	2	1.88795	1.22571	2	4.89703	0.930404	2	1.61546	0.962785	2	0.481781	0.912531	2	2.78015	0.931478	2	1.83953	0.93538	2	0.872503	0.911844	2	2.32888	1.22162	2	7.44769	289	32.0669	9.1001
O08984	Delta(14)-sterol reductase LBR OS=Rattus norvegicus OX=10116 GN=Lbr PE=1 SV=1 - [LBR_RAT]	197.365	8.06	2	5	5	11	1.0957	11	6.78257	1.12337	11	4.18775	0.965012	11	4.48574	0.999717	11	4.1365	0.923463	11	4.86484	0.96753	11	4.50008	0.931204	11	2.76085	0.95269	11	5.99481	1.11753	11	7.46566	620	70.6793	9.56885
Q6AXT5	Ras-related protein Rab-21 OS=Rattus norvegicus OX=10116 GN=Rab21 PE=2 SV=1 - [RAB21_RAT]	197.131	10.76	1	2	2	4	0.97313	4	8.06166	0.985189	4	7.7119	1.0173	4	2.5231	1.05008	4	1.70085	1.00993	4	5.56925	1.01665	4	1.68552	0.983292	4	5.14946	0.968424	4	5.46671	1.00517	4	11.857	223	24.1482	7.94287
P13221	Aspartate aminotransferase, cytoplasmic OS=Rattus norvegicus OX=10116 GN=Got1 PE=1 SV=3 - [AATC_RAT]	197.063	14.04	3	5	6	7	0.81348	6	4.34078	0.78387	6	4.00665	1.07989	6	1.74696	1.05949	6	5.66138	1.09227	6	3.54508	1.06576	6	9.50666	1.04728	6	2.08374	1.05807	6	6.2039	0.754493	6	7.7118	413	46.3995	7.21045
G3V8Q1	Coatomer subunit epsilon OS=Rattus norvegicus OX=10116 GN=Cope PE=1 SV=3 - [G3V8Q1_RAT]	196.819	26.3	4	6	6	7	1.00256	7	2.00349	1.06751	7	8.30027	0.973773	7	7.54963	0.962464	7	3.98779	1.00706	7	4.79399	0.987516	7	2.95685	0.99173	7	8.01616	0.980759	7	3.05163	0.992824	7	9.76458	308	34.6315	5.12256
A0A0G2JZM2	Protein transport protein SEC23 OS=Rattus norvegicus OX=10116 GN=Sec23a PE=1 SV=1 - [A0A0G2JZM2_RAT]	196.723	9.59	4	5	6	8	1.07014	7	6.80813	1.07726	7	12.6292	0.954636	7	2.93371	0.983267	7	1.8422	0.983036	7	9.34428	0.978465	7	3.25506	0.999934	7	8.41258	1.00992	7	8.44354	1.02301	7	5.93702	751	84.6585	7.29834
B5DF91	ELAV-like protein 1 OS=Rattus norvegicus OX=10116 GN=Elavl1 PE=1 SV=1 - [ELAV1_RAT]	195.196	18.1	8	7	7	10	1.01235	10	5.54635	1.06029	10	2.90521	0.973231	10	3.18045	1.01064	10	2.99059	0.99403	10	5.52092	0.998757	10	4.78833	0.97748	10	3.50769	0.982851	10	6.80574	1.00825	10	4.17633	326	36.1461	9.0415
Q99J82	Integrin-linked protein kinase OS=Rattus norvegicus OX=10116 GN=Ilk PE=2 SV=1 - [ILK_RAT]	194.988	11.06	1	5	5	6	1.07261	6	3.99765	1.04394	6	2.57894	0.97769	6	3.12608	0.968609	6	4.34406	0.999196	6	6.97166	0.957411	6	4.06629	0.994252	6	2.1045	0.975206	6	8.33754	1.06573	6	11.6466	452	51.3399	8.07471
D4A3E1	Heterogeneous nuclear ribonucleoprotein L-like OS=Rattus norvegicus OX=10116 GN=Hnrnpll PE=1 SV=1 - [D4A3E1_RAT]	194.981	20.3	3	9	9	9	1.02384	8	7.14884	0.985974	9	9.54047	1.02066	9	6.06582	1.01326	8	4.35046	0.989042	9	9.83597	0.949811	9	6.66363	1.00125	9	7.4385	0.936629	9	8.45978	1.043	9	14.8432	591	64.3225	5.94775
Q6PCT3	Tumor protein D54 OS=Rattus norvegicus OX=10116 GN=Tpd52l2 PE=1 SV=1 - [TPD54_RAT]	194.948	22.27	4	4	5	7	0.997433	6	7.14409	1.01696	6	5.09057	1.02091	6	1.23893	1.00211	6	1.11957	1.03249	6	2.55782	0.998328	6	1.03399	1.01167	6	1.8117	1.00141	6	3.62563	0.97689	6	2.14755	220	23.9771	6.15088
O08623	Sequestosome-1 OS=Rattus norvegicus OX=10116 GN=Sqstm1 PE=1 SV=1 - [SQSTM_RAT]	194.826	26.2	12	5	6	6	0.66503	5	23.3508	0.605919	5	17.063	1.12677	5	3.40278	1.10741	5	3.7411	1.13539	5	7.35183	1.17638	5	0.502162	1.13057	5	8.55526	1.1031	5	7.44543	0.644624	5	7.26578	439	47.651	5.17334
D3Z8L7	Ras-related protein R-Ras OS=Rattus norvegicus OX=10116 GN=Rras PE=1 SV=1 - [RRAS_RAT]	194.565	19.72	1	4	5	7	1.00516	4	5.54956	0.956854	4	5.73408	1.08195	4	4.66621	1.03983	4	2.78045	0.996665	4	5.44556	0.965349	4	10.6369	1.07084	4	1.9924	1.02464	4	8.57161	0.891484	4	4.48846	218	23.8942	7.34229
P27008	Poly [ADP-ribose] polymerase 1 OS=Rattus norvegicus OX=10116 GN=Parp1 PE=1 SV=4 - [PARP1_RAT]	194.387	9.86	3	9	10	10	1.03539	9	6.83862	1.05075	9	8.31075	1.00142	9	6.7516	0.999284	9	5.62711	0.971765	9	7.82848	1.01962	9	1.88295	0.96472	9	7.46394	0.993498	9	12.141	1.00236	9	11.8455	1014	112.589	8.96826
Q6AYK8	Eukaryotic translation initiation factor 3 subunit D OS=Rattus norvegicus OX=10116 GN=Eif3d PE=1 SV=1 - [EIF3D_RAT]	193.521	11.31	5	7	7	9	0.973819	7	5.26334	1.00673	7	1.60838	1.03806	7	4.30865	1.05053	7	1.97081	1.01233	7	7.53021	1.00208	7	5.87299	1.00804	7	7.73881	1.01144	7	5.79087	0.976439	7	10.3453	548	63.9484	6.04932
P63322	Ras-related protein Ral-A OS=Rattus norvegicus OX=10116 GN=Rala PE=1 SV=1 - [RALA_RAT]	193.429	13.11	9	2	3	5	1.01397	4	2.7285	0.996042	4	5.75432	0.985438	4	1.26661	1.05745	4	1.37717	0.937604	4	5.54827	1.06487	4	1.50981	0.954921	4	6.57643	0.969744	4	4.9975	1.02795	4	14.7941	206	23.538	7.10791
D4A1Y5	Methenyltetrahydrofolate cyclohydrolase OS=Rattus norvegicus OX=10116 GN=Mthfd2 PE=3 SV=1 - [D4A1Y5_RAT]	193.278	17.77	1	5	5	6	0.703895	6	12.0583	0.718086	6	8.16255	1.10045	6	3.43009	1.13251	6	7.84213	1.09318	6	1.73566	1.14272	6	4.38039	1.13225	6	2.77607	1.09279	6	1.04636	0.672262	6	12.3539	349	37.6931	8.51416
G3V7Z3	Nucleolar protein 3 OS=Rattus norvegicus OX=10116 GN=Nol3 PE=1 SV=1 - [G3V7Z3_RAT]	193.168	17.19	3	2	2	3	0.983431	3	2.49699	1.00553	3	4.47009	1.03654	3	7.31498	1.03413	3	4.3568	0.969703	3	1.50095	1.02243	3	1.11074	0.973761	3	11.2661	0.967907	3	1.74462	0.973714	3	4.68573	221	24.4763	4.06885
P63095	Guanine nucleotide-binding protein G(s) subunit alpha isoforms short OS=Rattus norvegicus OX=10116 GN=Gnas PE=1 SV=1 - [GNAS2_RAT]	192.71	12.94	13	4	6	8	1.07616	4	2.289	1.03255	4	6.24201	1.01924	4	0.31614	1.03966	4	2.91872	0.939929	4	4.28077	1.00364	4	3.46473	0.960768	4	2.49562	0.959446	4	2.63965	1.02371	4	3.30006	394	45.6349	5.96045
Q5RKG9	Eukaryotic translation initiation factor 4B OS=Rattus norvegicus OX=10116 GN=Eif4b PE=1 SV=1 - [Q5RKG9_RAT]	192.673	22.59	7	14	17	24	0.968365	19	10.9479	0.938513	19	7.54834	1.00645	19	9.684	0.995443	19	7.58209	0.976022	19	9.47604	0.970763	19	10.1363	1.07709	19	7.32246	1.08033	19	9.44507	0.944094	19	12.6472	611	69.0233	5.80811
Q4FZY0	EF-hand domain-containing protein D2 OS=Rattus norvegicus OX=10116 GN=Efhd2 PE=1 SV=1 - [EFHD2_RAT]	192.001	13.81	1	3	3	6	1.03587	6	3.27552	1.01457	6	5.1883	0.987068	6	2.73346	1.0086	6	3.71633	0.986326	6	3.04344	1.00486	6	2.82455	1.01288	6	4.658	0.989663	6	4.78082	0.954352	6	0.587772	239	26.7425	5.07178
Q5FWY5	AH receptor-interacting protein OS=Rattus norvegicus OX=10116 GN=Aip PE=1 SV=1 - [AIP_RAT]	191.748	25.45	1	7	7	10	1.00371	10	7.26011	1.00637	10	4.23108	0.998833	10	1.61055	1.02301	10	3.1082	0.986868	10	2.17706	1.02515	10	3.41907	1.00886	10	6.4196	0.984835	10	4.1222	1.00577	10	5.4942	330	37.5752	6.53662
B2RZ24	Succinate-CoA ligase subunit beta (Fragment) OS=Rattus norvegicus OX=10116 GN=Sucla2 PE=2 SV=1 - [B2RZ24_RAT]	191.489	22.15	2	9	9	11	0.909476	11	6.54883	0.981815	11	7.44239	1.03303	11	4.44385	1.02921	11	3.50409	1.01562	11	1.77207	1.03741	11	3.86056	1.00752	11	3.37058	1.01581	11	2.20788	0.948183	11	9.17368	438	47.3576	6.45557
B2RYU7	Cbx5 protein OS=Rattus norvegicus OX=10116 GN=Cbx5 PE=1 SV=1 - [B2RYU7_RAT]	191.313	20.94	4	5	6	8	1.19351	7	7.84838	1.22312	7	9.62847	0.909468	7	3.56752	0.938515	7	4.36758	0.930173	7	6.77618	0.921838	7	5.40949	0.935005	7	7.21026	0.921616	7	7.74235	1.18659	7	7.27642	191	22.172	5.85889
A0A0G2JSR7	Matrin-3 OS=Rattus norvegicus OX=10116 GN=Matr3 PE=1 SV=1 - [A0A0G2JSR7_RAT]	190.951	9.59	12	9	10	15	1.00956	13	8.99529	1.07689	13	9.6797	1.00031	13	2.76341	0.946779	13	7.82113	1.03776	13	12.8497	0.96695	13	9.09746	1.00876	13	14.4665	0.981753	13	10.5246	1.05628	13	11.9809	845	94.4438	6.25244
B5DF03	Peptidylprolyl isomerase (Fragment) OS=Rattus norvegicus OX=10116 GN=Fkbp3 PE=2 SV=1 - [B5DF03_RAT]	190.654	33.18	9	7	8	16	1.01625	12	4.81239	1.05688	12	7.73313	0.96978	12	5.89576	1.02474	12	5.61404	0.967322	12	8.44729	1.02509	12	11.7617	0.9767	12	9.80665	0.957874	12	7.46605	1.04326	12	9.8872	220	24.8191	9.27588
P62138	Serine/threonine-protein phosphatase PP1-alpha catalytic subunit OS=Rattus norvegicus OX=10116 GN=Ppp1ca PE=1 SV=1 - [PP1A_RAT]	190.493	10	8	1	3	7	1.10184	2	9.01534	1.13371	2	2.18433	0.977787	2	3.2956	0.997519	2	1.07587	0.955291	2	1.0709	0.973074	2	3.70218	0.949902	2	0.198282	0.961098	2	0.858836	1.04259	2	0.364382	330	37.4878	6.32861
Q5PQR0	RALY heterogeneous nuclear ribonucleoprotein OS=Rattus norvegicus OX=10116 GN=Raly PE=1 SV=1 - [Q5PQR0_RAT]	189.99	27.46	3	8	8	10	1.08304	10	7.20807	1.09838	10	8.40516	0.981928	10	5.49114	0.942543	10	2.01227	0.966436	10	5.90325	0.936418	10	5.54351	0.989356	10	8.33844	0.982627	10	9.80652	1.0847	10	11.7479	295	31.0311	9.46631
M0RA26	Ribosomal protein S27-like OS=Rattus norvegicus OX=10116 GN=LOC100362987 PE=3 SV=1 - [M0RA26_RAT]	189.84	15.48	3	1	1	3	1.13295	3	1.79866	1.14894	3	4.30132	0.935375	3	2.41127	1.01911	3	0.24485	0.887451	3	0.722017	1.0515	3	0.938756	0.88122	3	1.04244	0.885423	3	0.582942	1.13413	3	5.45565	84	9.50993	9.70068
O08629	Transcription intermediary factor 1-beta OS=Rattus norvegicus OX=10116 GN=Trim28 PE=1 SV=2 - [TIF1B_RAT]	189.812	14.25	1	12	12	13	1.14737	13	13.7872	1.13805	13	11.4557	0.954307	13	6.42064	0.937534	13	4.81289	0.946732	13	7.01695	0.932968	13	4.03288	0.938235	13	7.32805	0.954879	13	2.13156	1.12583	13	7.3149	835	88.8995	5.77002
Q5RJR2	Twinfilin-1 OS=Rattus norvegicus OX=10116 GN=Twf1 PE=1 SV=1 - [TWF1_RAT]	189.65	14.29	1	5	5	6	1.10081	6	3.01076	1.13143	6	6.04899	1.00259	6	2.01782	0.972217	6	2.75276	0.971414	6	3.49836	0.97366	6	1.70083	1.02491	6	7.95163	0.931827	6	5.98992	1.02709	6	4.19451	350	40.0655	6.66846
Q2PS20	Junctophilin-2 OS=Rattus norvegicus OX=10116 GN=Jph2 PE=1 SV=1 - [JPH2_RAT]	188.991	8.53	12	5	5	6	0.988184	5	4.5391	0.970063	5	7.00628	0.968123	5	4.87616	0.987592	5	2.01451	1.03426	5	6.191	1.05264	5	4.48096	0.961252	5	2.34584	0.982463	5	1.82158	1.01894	5	9.45163	692	74.2134	8.36768
Q6PEC4	S-phase kinase-associated protein 1 OS=Rattus norvegicus OX=10116 GN=Skp1 PE=1 SV=3 - [SKP1_RAT]	188.762	39.26	2	5	6	12	1.06407	9	8.14896	1.09726	9	15.5219	1.04102	9	7.66235	0.969992	9	6.60686	0.957609	9	18.1981	0.957466	9	7.07243	0.978174	9	19.5372	0.926399	9	13.4735	1.08174	9	8.46913	163	18.6603	4.53857
Q9WTT7	Basic leucine zipper and W2 domain-containing protein 2 OS=Rattus norvegicus OX=10116 GN=Bzw2 PE=1 SV=1 - [BZW2_RAT]	188.744	5.49	6	1	4	9	0.93504	1		0.964795	1		1.00792	1		1.01015	1		0.999234	1		1.07957	1		1.0196	1		0.998959	1		0.968349	1		419	48.0189	6.68311
Q6P784	Branched-chain-amino-acid aminotransferase OS=Rattus norvegicus OX=10116 GN=Bcat2 PE=2 SV=1 - [Q6P784_RAT]	188.64	10.31	3	4	4	8	1.00682	8	8.07608	1.00003	8	6.19957	1.00748	8	3.18927	1.01	8	3.30158	1.00801	8	8.5599	1.01417	8	3.47981	0.991849	8	9.31021	0.983552	8	5.38531	1.01357	8	4.9785	388	43.5676	8.30908
Q62829	Serine/threonine-protein kinase PAK 3 OS=Rattus norvegicus OX=10116 GN=Pak3 PE=1 SV=1 - [PAK3_RAT]	188.32	8.27	1	1	4	6	1.12645	1		1.16161	1		0.966226	1		0.883562	1		1.00015	1		0.92165	1		1.00197	1		0.973211	1		1.12667	1		544	60.6727	5.51611
A0A0G2K6D5	Pitrilysin metalloproteinase 1 OS=Rattus norvegicus OX=10116 GN=Pitrm1 PE=1 SV=1 - [A0A0G2K6D5_RAT]	188.28	8.12	5	8	9	9	0.920582	8	3.71577	0.911459	8	3.79907	1.00693	8	7.43943	1.03838	8	3.89662	1.00782	8	5.42695	1.07015	8	6.89306	1.00435	8	3.80138	1.02427	8	3.16802	0.904874	8	8.67785	1035	117.346	6.88818
Q5PQJ6	Pyrroline-5-carboxylate reductase 3 OS=Rattus norvegicus OX=10116 GN=Pycr3 PE=2 SV=1 - [P5CR3_RAT]	188.171	16.42	1	4	4	6	0.995216	6	14.5332	0.948767	6	10.2165	1.0057	6	2.11379	1.03404	6	4.70835	1.03346	6	10.4127	1.04261	6	3.73646	0.962177	6	9.75912	1.02292	6	3.71615	1.01681	6	4.27159	274	28.8598	7.06396
P53534	Glycogen phosphorylase, brain form (Fragment) OS=Rattus norvegicus OX=10116 GN=Pygb PE=1 SV=3 - [PYGB_RAT]	187.883	7.4	6	5	5	6	0.977343	6	4.43367	0.98547	6	5.43287	1.00117	6	2.95619	0.997079	6	4.78333	1.00739	6	3.45919	1.01428	6	3.99995	1.00396	6	3.91261	1.03247	6	5.67437	1.0105	6	1.43474	838	96.1131	6.68311
Q6AY58	B-cell receptor-associated protein OS=Rattus norvegicus OX=10116 GN=Bcap31 PE=1 SV=1 - [Q6AY58_RAT]	187.228	29.8	1	7	8	12	0.973949	11	5.84231	0.981323	11	4.73097	1.02353	11	5.70725	1.00574	11	4.71134	1.01451	11	3.36307	0.999691	11	2.18231	1.0066	11	6.84326	1.00412	11	3.18847	0.966647	11	7.61589	245	27.894	8.88037
D3ZP96	DNA replication licensing factor MCM2 OS=Rattus norvegicus OX=10116 GN=Mcm2 PE=1 SV=2 - [D3ZP96_RAT]	187.054	9.06	8	7	8	10	1.30752	9	23.4744	1.36037	9	20.9682	0.853899	9	6.95229	0.894164	9	7.61582	0.842803	9	6.22828	0.88966	9	8.52372	0.888339	9	14.0443	0.892905	9	9.53613	1.34123	9	15.1676	905	102.079	5.63037
Q8K585	High mobility group protein HMG-I/HMG-Y OS=Rattus norvegicus OX=10116 GN=Hmga1 PE=1 SV=3 - [HMGA1_RAT]	186.87	55.14	2	5	6	11	0.811017	10	10.1551	0.841358	10	7.48891	1.1063	10	3.60396	1.10182	10	7.23349	1.0208	10	5.02585	1.14699	10	6.76049	0.932875	10	12.7738	0.989175	10	12.8937	0.824204	10	19.062	107	11.6992	10.3159
Q9Z270	Vesicle-associated membrane protein-associated protein A OS=Rattus norvegicus OX=10116 GN=Vapa PE=1 SV=3 - [VAPA_RAT]	186.497	33.33	10	5	7	15	0.926719	11	6.98925	0.922338	11	5.03981	1.03569	11	3.94804	1.04566	11	5.33215	1.02567	11	5.87702	1.06122	11	10.0673	1.04769	11	7.70899	1.03974	11	6.92811	0.923252	11	6.50338	249	27.8233	8.39697
B1WC67	RCG29001 OS=Rattus norvegicus OX=10116 GN=Slc25a24 PE=1 SV=1 - [B1WC67_RAT]	186.424	15.37	1	8	8	9	0.959921	9	3.0195	1.00782	9	8.68322	0.998599	9	4.92498	0.981717	9	1.95927	1.02249	9	2.5626	1.0012	9	8.32596	1.00102	9	8.55346	1.05989	9	4.45867	0.985036	9	3.99369	475	52.8573	8.04541
P61314	60S ribosomal protein L15 OS=Rattus norvegicus OX=10116 GN=Rpl15 PE=1 SV=2 - [RL15_RAT]	186.35	35.78	2	8	8	15	1.01216	15	10.9627	0.980416	15	7.84972	0.999427	15	8.33263	1.05863	15	4.64996	0.953434	15	15.6934	1.07185	15	7.62193	0.967219	15	13.9184	0.989066	15	9.13911	1.00737	15	12.3608	204	24.1311	11.6196
F1LQS6	Xanthine dehydrogenase OS=Rattus norvegicus OX=10116 GN=Xdh PE=1 SV=2 - [F1LQS6_RAT]	185.671	5.48	2	5	6	8	1.09363	7	11.5199	1.05991	7	10.5091	0.972563	7	1.49165	0.971844	7	0.75589	0.899826	7	3.56288	0.983634	7	5.77036	0.952022	7	6.59148	0.971384	7	8.1142	1.14593	7	2.88167	1331	146.171	7.25439
D4AB03	Family with sequence similarity 120A OS=Rattus norvegicus OX=10116 GN=Fam120a PE=1 SV=2 - [D4AB03_RAT]	185.543	9.51	9	8	11	12	1.08086	9	7.50732	1.07948	9	7.22516	0.957464	9	8.3008	0.965147	9	4.36849	0.969785	9	7.4708	0.974518	9	2.83588	0.984424	9	4.73534	1.0113	9	11.3163	1.06047	9	9.05281	1115	122.064	8.83643
B0K008	Eukaryotic translation initiation factor 1 OS=Rattus norvegicus OX=10116 GN=Eif1 PE=1 SV=1 - [B0K008_RAT]	184.593	31.86	6	3	4	6	1.06247	5	3.7799	1.02897	5	2.9862	0.995124	5	3.41288	1.0077	5	1.42752	0.954688	5	1.43398	0.996501	5	2.18988	0.985415	5	1.81793	1.01327	5	3.79947	1.03874	5	4.70934	113	12.7386	7.44482
B2RYF8	Cnpy3 protein OS=Rattus norvegicus OX=10116 GN=Cnpy3 PE=2 SV=1 - [B2RYF8_RAT]	184.11	13.41	2	3	3	5	1.11682	5	5.25826	1.117	5	1.93515	0.952961	5	5.79289	0.96458	5	5.22925	0.923658	5	3.34451	1.01132	5	3.24089	0.929405	5	6.52263	0.949646	5	3.84693	1.11871	5	5.63607	276	30.5977	6.12549
P13941	Collagen alpha-1(III) chain OS=Rattus norvegicus OX=10116 GN=Col3a1 PE=2 SV=3 - [CO3A1_RAT]	183.089	10.53	1	11	11	12	1.88686	12	26.9323	1.87624	12	33.604	0.688844	12	22.2008	0.690723	12	19.8036	0.66431	12	25.0193	0.702668	12	26.2868	0.682683	12	24.7769	0.668167	12	28.9432	1.81387	12	20.1942	1463	138.851	6.52197
F1SW39	PC4 and SFRS1 interacting protein 1 OS=Rattus norvegicus OX=10116 GN=Psip1 PE=1 SV=1 - [F1SW39_RAT]	182.405	24.81	5	14	14	20	1.13761	20	7.08289	1.1647	20	8.25122	0.931639	20	5.39231	0.964941	20	2.76695	0.938014	20	5.5101	0.965009	20	6.33418	0.916081	20	4.57715	0.946805	20	3.73231	1.17238	20	5.50972	528	59.5795	9.12939
F7FKI5	Pyruvate dehydrogenase E1 component subunit alpha OS=Rattus norvegicus OX=10116 GN=Pdha1 PE=1 SV=2 - [F7FKI5_RAT]	182.404	15.94	5	7	7	9	0.92601	9	7.94644	0.915314	9	8.66425	1.03865	9	3.80184	1.03978	9	2.70381	0.991776	9	3.39886	1.0528	9	3.76333	0.99735	9	7.83612	0.996423	9	4.75658	0.887833	9	15.6577	389	43.0856	8.19189
P20788	Cytochrome b-c1 complex subunit Rieske, mitochondrial OS=Rattus norvegicus OX=10116 GN=Uqcrfs1 PE=1 SV=2 - [UCRI_RAT]	181.993	13.87	1	4	4	7	0.908542	7	4.34418	0.90736	7	1.76313	1.0106	7	1.46572	1.02269	7	6.83999	1.05208	7	3.69606	1.04622	7	3.42067	1.04883	7	5.67644	1.03976	7	10.3695	0.939947	7	5.52136	274	29.4272	8.86572
Q6MG08	ATP-binding cassette sub-family F member 1 OS=Rattus norvegicus OX=10116 GN=Abcf1 PE=1 SV=1 - [ABCF1_RAT]	181.794	9.65	1	7	9	13	0.911978	10	8.30453	0.930605	10	5.63208	0.981407	10	8.33646	1.0264	10	7.7592	1.03416	10	7.49145	1.02505	10	9.47166	1.07008	10	6.71243	1.02676	10	11.3786	0.903423	10	13.9292	839	95.1931	6.65381
A0A023ILN9	Proteasome subunit beta OS=Rattus norvegicus OX=10116 GN=Psmb9 PE=2 SV=1 - [A0A023ILN9_RAT]	181.45	16.89	3	3	3	4	0.973826	4	2.19532	1.03385	4	5.87227	1.01521	4	4.9102	1.01883	4	2.34414	0.951692	4	7.69325	1.05356	4	6.81456	1.02598	4	6.95147	0.992965	4	5.37327	0.952606	4	5.11268	219	23.3286	5.12256
Q4FZS2	BUB3 mitotic checkpoint protein OS=Rattus norvegicus OX=10116 GN=Bub3 PE=1 SV=1 - [Q4FZS2_RAT]	181.417	16.56	3	4	4	5	1.1365	5	3.27777	1.12437	5	8.64031	0.945134	5	6.04337	0.958964	5	9.08982	0.938506	5	5.43947	0.972397	5	6.13106	0.958077	5	4.80513	0.942642	5	7.40303	1.08247	5	9.17176	326	36.9311	6.84424
Q794F9	4F2 cell-surface antigen heavy chain OS=Rattus norvegicus OX=10116 GN=Slc3a2 PE=1 SV=1 - [4F2_RAT]	181.21	15.94	2	8	8	9	0.680508	9	13.4777	0.725977	9	16.1627	1.12523	9	5.45085	1.15644	9	4.89527	1.09425	9	5.12934	1.0866	9	7.84271	1.08175	9	7.39604	1.08255	9	5.04073	0.743108	9	9.66963	527	58.0361	5.32568
A0A0G2JU66	Nuclear protein localization protein 4 homolog OS=Rattus norvegicus OX=10116 GN=Nploc4 PE=1 SV=1 - [A0A0G2JU66_RAT]	180.867	8.39	3	5	5	6	1.01178	6	8.12933	1.01345	6	9.55998	0.988784	6	0.520087	1.01704	6	2.46218	0.993433	6	11.8375	1.0125	6	1.95851	0.988391	6	5.50824	0.999293	6	6.27789	0.978014	6	12.5069	608	67.9709	6.49365
D4A233	Polyadenylate-binding protein OS=Rattus norvegicus OX=10116 GN=Pabpc2 PE=3 SV=1 - [D4A233_RAT]	180.704	13.97	2	1	9	14	1.17303	1		1.20232	1		0.923007	1		0.933074	1		0.966588	1		0.915371	1		0.923703	1		0.915171	1		1.24682	1		630	69.1267	8.89502
D3ZC84	Ubiquitinyl hydrolase 1 OS=Rattus norvegicus OX=10116 GN=Usp9x PE=1 SV=1 - [D3ZC84_RAT]	180.581	3.06	8	4	6	7	0.98623	4	5.18541	1.06945	4	4.30257	0.979274	4	4.21306	0.999619	4	5.70188	1.00683	4	2.82057	0.998648	4	1.00263	0.992222	4	5.44389	0.992924	4	5.89745	1.04169	4	4.24541	2547	289.255	5.78271
B5DF65	Biliverdin reductase B OS=Rattus norvegicus OX=10116 GN=Blvrb PE=1 SV=1 - [B5DF65_RAT]	180.55	34.95	1	5	5	9	0.918843	9	8.66446	0.904119	9	9.58841	1.02023	9	4.51051	1.0669	9	4.2387	1.01424	9	7.58266	1.0778	9	4.97949	0.952041	9	5.77295	1.03708	9	8.50058	0.963251	9	9.39694	206	22.0803	6.80029
A0A0G2JSH9	Peroxiredoxin-2 OS=Rattus norvegicus OX=10116 GN=Prdx2 PE=1 SV=1 - [A0A0G2JSH9_RAT]	180.464	39.39	2	6	6	8	0.996464	8	3.90581	0.993317	8	5.24965	1.00986	8	5.43292	1.05628	8	3.07673	0.979661	8	11.4006	1.04092	8	7.76938	0.9713	8	7.76901	0.973498	8	5.56022	0.999796	8	7.42282	198	21.7841	5.59229
F1M446	Ecm29 proteasome adaptor and scaffold OS=Rattus norvegicus OX=10116 GN=Ecpas PE=1 SV=3 - [F1M446_RAT]	179.881	4.95	1	6	7	8	0.95788	7	2.92241	0.939387	7	8.22118	1.05864	7	5.65155	1.00281	7	3.47621	0.982324	7	5.86782	1.04534	7	7.28409	1.00631	7	9.61514	0.980676	7	6.23405	0.959413	7	10.1129	1839	203.79	7.13721
D3ZZ62	Exportin-T OS=Rattus norvegicus OX=10116 GN=Xpot PE=1 SV=1 - [D3ZZ62_RAT]	178.968	4.12	7	2	3	4	0.670128	3	6.15091	0.723332	3	12.4242	1.13703	3	0.15071	1.06838	3	0.125636	1.09523	3	4.84203	1.10069	3	0.812815	1.13836	3	3.63021	1.12377	3	0.370545	0.628482	3	5.30287	728	83.4302	5.46533
P41498	Low molecular weight phosphotyrosine protein phosphatase OS=Rattus norvegicus OX=10116 GN=Acp1 PE=1 SV=3 - [PPAC_RAT]	178.95	24.05	4	4	4	5	0.987294	5	1.27976	0.963614	5	6.38589	1.01424	5	2.78941	1.00096	5	3.48066	0.985827	5	5.78965	1.04637	5	1.62048	0.986644	5	4.59423	0.983054	5	7.93378	1.01169	5	6.39125	158	18.1398	6.52197
O54892	Hexokinase OS=Rattus norvegicus OX=10116 PE=2 SV=1 - [O54892_RAT]	178.843	13.09	11	8	12	13	0.823727	9	4.42578	0.885176	9	3.52509	1.06844	9	1.87731	1.10055	9	8.15855	1.02659	9	5.66701	1.08341	9	4.62873	1.02514	9	7.59521	1.03861	9	2.86735	0.863191	9	8.97937	917	102.446	6.1001
D3ZXS8	E2 ubiquitin-conjugating enzyme OS=Rattus norvegicus OX=10116 GN=Ube2k PE=1 SV=1 - [D3ZXS8_RAT]	178.84	30.5	1	6	6	8	0.994571	8	8.81352	1.01501	8	9.93754	1.02869	8	4.65315	1.00126	8	2.99747	1.00545	8	6.96001	1.00398	8	5.40978	1.01393	8	9.41637	1.02212	8	3.60567	0.979616	8	5.68412	200	22.3926	5.43994
P41516	DNA topoisomerase 2-alpha OS=Rattus norvegicus OX=10116 GN=Top2a PE=1 SV=1 - [TOP2A_RAT]	178.833	7.27	3	11	11	11	1.04904	11	6.9278	1.05694	11	10.2529	0.992286	11	2.88807	0.987847	11	2.65212	0.969959	11	10.7032	0.995369	11	5.03517	0.995667	11	3.62376	0.984609	11	5.64628	1.01813	11	13.3135	1526	173.112	8.73389
B1H227	LOC682908 protein OS=Rattus norvegicus OX=10116 GN=Rcc1 PE=1 SV=1 - [B1H227_RAT]	178.269	11.16	1	3	3	4	0.962227	4	1.74718	0.982215	4	5.73901	0.986289	4	3.02769	0.969035	4	1.95657	1.01706	4	7.84662	0.99878	4	2.14865	1.01438	4	4.10186	1.04048	4	4.34827	1.00072	4	5.04698	421	45.0828	7.91357
G3V8Z9	COP9 (Constitutive photomorphogenic) homolog, subunit 7a (Arabidopsis thaliana) (Predicted) OS=Rattus norvegicus OX=10116 GN=Cops7a PE=1 SV=1 - [G3V8Z9_RAT]	178.247	11.64	3	3	3	4	0.908613	4	2.61252	0.920899	4	6.29042	1.00653	4	0.524547	1.03923	4	2.51265	1.06282	4	7.57377	0.996513	4	1.35058	1.08244	4	2.12434	1.04745	4	3.6312	0.917839	4	5.67505	275	30.201	7.86963
D3ZFD0	Unconventional myosin-XVIIIa OS=Rattus norvegicus OX=10116 GN=Myo18a PE=1 SV=2 - [MY18A_RAT]	178.041	5.38	10	9	11	13	1.00394	10	5.60477	1.01528	10	8.87738	0.976671	10	4.62989	0.954072	10	3.93759	1.00981	10	6.42053	0.970324	10	5.4364	1.04797	10	7.77986	1.06507	10	4.04519	1.00995	10	6.22581	2044	232.523	6.354
G3V8R0	Small acidic protein OS=Rattus norvegicus OX=10116 GN=RGD1311703 PE=1 SV=1 - [G3V8R0_RAT]	177.775	20.99	1	4	4	7	1.09605	7	9.14527	1.11186	7	8.99823	0.965664	7	5.03902	1.01286	7	3.26552	0.940331	7	9.25919	1.00723	7	2.14885	0.968091	7	5.73579	0.931844	7	7.80959	1.09354	7	3.50586	181	19.9491	4.84326
A0A0G2K4V4	3-ketodihydrosphingosine reductase OS=Rattus norvegicus OX=10116 GN=Kdsr PE=1 SV=1 - [A0A0G2K4V4_RAT]	177.559	19.29	2	5	5	11	1.04764	11	8.07285	1.09573	11	12.2345	0.999521	11	2.38247	1.02785	11	3.64745	0.891172	11	5.92155	1.03664	11	5.41009	0.93377	11	9.83693	0.93449	11	7.65191	1.06262	11	6.97784	311	34.1345	6.97607
D3ZRM5	RAB23, member RAS oncogene family OS=Rattus norvegicus OX=10116 GN=Rab23 PE=4 SV=1 - [D3ZRM5_RAT]	177.324	21.1	3	4	5	6	0.895358	5	1.67229	0.890211	5	3.0145	1.07491	5	4.57459	1.06611	5	4.47305	1.07858	5	1.50977	1.06806	5	2.40176	1.02104	5	5.60599	1.08555	5	4.50804	0.81952	5	14.5202	237	26.6165	6.78564
Q5D001	Adpgk protein (Fragment) OS=Rattus norvegicus OX=10116 GN=Adpgk PE=2 SV=1 - [Q5D001_RAT]	177.005	3.9	2	1	1	3	0.810734	3	0.518561	0.845723	3	0.319619	1.11318	3	10.9791	1.03125	3	2.8585	1.01836	3	4.00104	1.05472	3	5.18197	1.05636	3	2.6147	1.03898	3	2.4607	0.862238	3	16.8119	410	44.8147	5.50342
A0A0G2K2T6	Interleukin enhancer-binding factor 3 OS=Rattus norvegicus OX=10116 GN=Ilf3 PE=1 SV=1 - [A0A0G2K2T6_RAT]	176.975	15.94	8	12	13	14	0.965418	13	9.26937	0.970348	13	8.05958	1.02153	13	5.35813	1.00372	13	3.65492	0.992404	13	9.24561	1.01773	13	5.47151	0.97068	13	3.71799	1.00066	13	4.10309	0.985889	13	9.79684	897	95.7993	8.76318
F1LT49	Leucine-rich repeat-containing 47 OS=Rattus norvegicus OX=10116 GN=Lrrc47 PE=1 SV=2 - [F1LT49_RAT]	176.826	3.28	1	2	2	4	0.932389	4	1.11891	0.918424	4	9.1393	1.02655	4	1.63149	1.04182	4	2.31627	1.01565	4	1.77887	1.04008	4	1.12428	1.02223	4	1.60072	1.0085	4	3.60055	0.911696	4	2.9942	580	63.4916	8.23584
A0A0H2UHU1	60S ribosomal protein L37a OS=Rattus norvegicus OX=10116 GN=Rpl37a PE=3 SV=1 - [A0A0H2UHU1_RAT]	176.825	32.61	4	3	3	6	0.964946	6	8.63468	0.963702	6	5.10394	0.992643	6	5.39172	0.987489	6	1.05612	1.0326	6	3.49614	1.02682	6	4.18984	1.00087	6	5.98057	0.985318	6	3.88318	1.04561	6	9.41918	92	10.2694	10.2866
B1WC56	Ribonucloprotein OS=Rattus norvegicus OX=10116 GN=Nhp2 PE=1 SV=1 - [B1WC56_RAT]	176.7	11.11	1	1	1	3	0.975087	3	2.87488	0.890225	3	4.75505	1.01861	3	3.32854	0.923277	3	0.932543	1.07022	3	6.75899	0.911128	3	3.98859	1.14502	3	10.4434	1.08603	3	0.0235292	0.957342	3	6.8987	153	17.281	7.97217
P41499	Tyrosine-protein phosphatase non-receptor type 11 OS=Rattus norvegicus OX=10116 GN=Ptpn11 PE=1 SV=5 - [PTN11_RAT]	176.223	9.11	10	4	5	7	0.949578	6	2.53596	0.964073	6	1.99557	1.01324	6	5.30699	1.0156	6	4.79491	1.01247	6	6.22872	1.04543	6	7.11406	1.02414	6	10.761	1.03517	6	6.14524	0.906954	6	8.85195	593	67.9901	7.28369
D4A8A0	Aspartate carbamoyltransferase OS=Rattus norvegicus OX=10116 GN=Cad PE=1 SV=2 - [D4A8A0_RAT]	176.181	4.23	17	6	8	11	0.945264	7	6.25226	0.932344	7	5.86992	1.03141	7	3.23553	1.0422	7	2.34647	1.03011	7	3.37236	1.03955	7	0.978494	1.02465	7	5.31261	1.0497	7	3.16457	0.910578	7	5.74814	2224	243.217	6.53662
Q6P790	60S ribosomal protein L6 (Fragment) OS=Rattus norvegicus OX=10116 GN=Rpl6 PE=2 SV=1 - [Q6P790_RAT]	176.099	37.37	9	16	17	28	1.01104	22	6.2721	0.996529	22	7.49857	1.02881	22	2.9153	1.03163	22	5.97509	1.00463	22	8.56835	0.987021	22	7.46001	0.95527	22	8.44505	0.988786	22	6.3484	1.00239	22	9.39614	297	33.4529	10.7847
P02454	Collagen alpha-1(I) chain OS=Rattus norvegicus OX=10116 GN=Col1a1 PE=1 SV=5 - [CO1A1_RAT]	175.989	8.6	2	9	10	11	1.56923	10	27.3443	1.82014	10	23.8718	0.753417	10	18.1503	0.682552	10	23.237	0.806395	10	20.5465	0.715549	10	17.1499	0.694254	10	29.2422	0.771178	10	17.162	1.69892	10	17.4232	1453	137.869	5.92236
B4F7C9	Dolichyl-diphosphooligosaccharide--protein glycotransferase OS=Rattus norvegicus OX=10116 GN=Stt3a PE=1 SV=1 - [B4F7C9_RAT]	175.891	10.21	2	8	9	11	1.0122	10	3.05347	1.01546	10	5.59518	1.00223	10	5.07282	0.995137	10	5.52118	0.998646	10	8.57197	0.995016	10	5.56633	1.00929	10	8.70477	0.998389	10	5.77758	0.981951	10	7.78249	705	80.5449	8.104
G3V9P0	26S proteasome non-ATPase regulatory subunit 9 OS=Rattus norvegicus OX=10116 GN=Psmd9 PE=1 SV=1 - [G3V9P0_RAT]	175.581	26.58	2	6	6	12	0.956257	12	2.30807	1.00855	12	4.39134	1.01519	12	1.52444	1.03542	12	3.79436	0.97951	12	3.26768	1.03118	12	6.08893	0.963714	12	7.15859	0.970974	12	4.23549	1.02598	12	6.69535	222	24.7996	6.88818
Q63569	26S proteasome regulatory subunit 6A OS=Rattus norvegicus OX=10116 GN=Psmc3 PE=1 SV=1 - [PRS6A_RAT]	175.522	24.6	12	9	10	19	0.956023	17	4.60335	0.961831	17	2.66644	1.00037	17	3.45808	1.02528	17	4.77201	0.985754	17	8.05139	1.04927	17	3.38715	0.989041	17	4.11808	1.01156	17	5.17025	0.994611	17	6.51543	439	49.1294	5.23682
B2RZD4	60S ribosomal protein L34 OS=Rattus norvegicus OX=10116 GN=Rpl34 PE=1 SV=1 - [B2RZD4_RAT]	174.183	46.15	4	7	7	15	1.04624	15	12.9132	1.06588	15	13.2408	0.978014	15	6.72573	1.0344	15	3.73129	0.969314	15	6.84395	1.02716	15	6.53384	0.938188	15	10.941	0.961959	15	5.97287	1.06527	15	12.4083	117	13.2845	11.4731
Q3T1J1	Eukaryotic translation initiation factor 5A-1 OS=Rattus norvegicus OX=10116 GN=Eif5a PE=1 SV=3 - [IF5A1_RAT]	173.627	35.71	5	5	6	13	0.936709	11	10.7559	0.931082	11	4.90894	1.03149	11	4.52684	1.0582	11	5.29204	0.994917	11	7.2918	1.08564	11	6.17631	0.97561	11	5.33545	0.965184	11	9.6553	0.90565	11	14.7328	154	16.8214	5.23682
P38656	Lupus La protein homolog OS=Rattus norvegicus OX=10116 GN=Ssb PE=1 SV=1 - [LA_RAT]	173.338	22.65	4	11	12	14	1.02596	13	5.26667	1.0404	13	6.75322	1.00158	13	4.93054	1.02203	13	4.24564	0.967224	13	3.97714	1.0279	13	3.82041	0.965312	13	2.47793	0.973942	13	4.67625	1.01927	13	7.08174	415	47.7479	9.72998
P18437	Non-histone chromosomal protein HMG-17 OS=Rattus norvegicus OX=10116 GN=Hmgn2 PE=1 SV=2 - [HMGN2_RAT]	173.273	47.78	5	2	7	17	1.11181	6	14.1378	1.18901	6	9.05142	0.899393	6	7.73517	0.881532	6	7.95202	0.9505	6	7.06814	0.913414	6	7.54065	0.955054	6	6.63929	1.0054	6	12.8389	1.10123	6	3.8004	90	9.35997	9.87646
Q9JMJ4	Pre-mRNA-processing factor 19 OS=Rattus norvegicus OX=10116 GN=Prpf19 PE=1 SV=2 - [PRP19_RAT]	173.048	13.1	6	7	7	12	1.11023	11	4.9309	1.07851	11	5.2398	0.946247	11	4.24382	0.970659	11	5.15526	0.957626	11	8.05343	0.960813	11	4.81054	0.990138	11	6.2837	0.96729	11	5.15749	1.12721	11	13.3083	504	55.2044	6.60986
Q6GMN2	Brain-specific angiogenesis inhibitor 1-associated protein 2 OS=Rattus norvegicus OX=10116 GN=Baiap2 PE=1 SV=1 - [BAIP2_RAT]	172.964	14.58	1	9	9	14	0.919719	14	4.90334	0.968739	14	5.81461	1.03143	14	3.5827	1.07737	14	3.31857	0.976164	14	4.5511	1.08217	14	4.89258	0.969712	14	6.07041	0.980317	14	3.94811	0.956202	14	5.21679	535	59.1459	9.0415
Q4QQW8	Putative phospholipase B-like 2 OS=Rattus norvegicus OX=10116 GN=Plbd2 PE=1 SV=2 - [PLBL2_RAT]	172.572	6.84	2	4	4	6	1.0885	6	8.24272	1.07759	6	9.33832	0.964674	6	4.65687	0.952818	6	5.28434	1.02396	6	4.91147	0.91119	6	2.03027	1.02181	6	4.55415	0.990038	6	2.64526	1.02064	6	4.48864	585	65.4139	6.69775
Q5RKH2	Galactokinase 1 OS=Rattus norvegicus OX=10116 GN=Galk1 PE=1 SV=1 - [Q5RKH2_RAT]	172.55	16.07	1	7	7	8	0.932	8	11.4685	0.993028	8	10.8773	1.03271	8	5.48917	0.999574	8	5.98501	1.04177	8	4.9706	1.04686	8	1.4796	1.08572	8	4.0606	1.04152	8	5.5537	0.935131	8	9.75695	392	42.3495	5.35107
Q2VC85	GCS light chain (Fragment) OS=Rattus norvegicus OX=10116 GN=Gcln PE=2 SV=1 - [Q2VC85_RAT]	171.828	24.12	2	4	4	5	0.995269	5	6.12791	1.01495	5	1.97204	0.960071	5	2.83255	0.987927	5	5.53952	1.00255	5	8.95329	1.0197	5	4.65682	0.998807	5	6.87553	1.01553	5	6.04044	1.0028	5	12.7752	228	25.5551	4.93213
P21575	Dynamin-1 OS=Rattus norvegicus OX=10116 GN=Dnm1 PE=1 SV=2 - [DYN1_RAT]	171.379	11.23	14	2	11	12	0.955153	2	10.0764	0.968791	2	3.38995	0.98293	2	4.9373	0.94578	2	0.371946	1.07813	2	6.67318	0.966374	2	7.514	1.10581	2	0.389373	1.03607	2	0.676903	0.996354	2	12.5188	864	97.2339	6.87354
A0A0G2JUN7	Thioredoxin-disulfide reductase OS=Rattus norvegicus OX=10116 GN=Txnrd1 PE=1 SV=1 - [A0A0G2JUN7_RAT]	171.252	16.3	8	6	8	10	0.800802	8	4.63821	0.839769	8	5.93937	1.09507	8	6.68343	1.10408	8	7.14613	1.06304	8	7.80291	1.05481	8	3.31575	1.03084	8	7.28985	0.988903	8	3.67084	0.822762	8	11.9005	497	54.4637	6.46826
D4AAT4	Sm protein F OS=Rattus norvegicus OX=10116 GN=Snrpf PE=1 SV=1 - [D4AAT4_RAT]	171.04	15.12	1	1	1	3	1.13077	3	7.6528	1.08112	3	7.34354	0.98024	3	4.13606	0.903799	3	3.71541	0.996873	3	6.05608	0.895618	3	2.99103	1.01783	3	3.02833	1.02564	3	14.2068	1.20787	3	2.01965	86	9.71878	4.66553
A0A0G2JWR5	TATA-binding protein-associated factor 2N-like OS=Rattus norvegicus OX=10116 GN=LOC103694865 PE=3 SV=1 - [A0A0G2JWR5_RAT]	170.948	11.43	4	2	5	10	1.04312	2	12.336	0.978804	2	5.39323	1.00448	2	6.89014	1.06255	2	1.37454	1.04563	2	2.05435	0.924389	2	16.8741	0.994563	2	7.69938	0.979578	2	8.81097	0.99141	2	1.39614	560	58.4407	8.23584
Q6P7A4	Prosaposin OS=Rattus norvegicus OX=10116 GN=Psap PE=2 SV=1 - [Q6P7A4_RAT]	170.662	10.67	3	6	6	8	1.19313	8	11.8404	1.18697	8	4.07041	1.05892	8	3.81676	1.00519	8	4.61093	0.845853	8	9.89209	1.06287	8	7.03955	0.833748	8	17.2499	0.812084	8	12.9626	1.15139	8	14.4797	553	60.9995	5.24951
A0A0H2UHG7	40S ribosomal protein S20 OS=Rattus norvegicus OX=10116 GN=Rps20 PE=3 SV=1 - [A0A0H2UHG7_RAT]	170.538	32.2	11	3	4	14	0.998798	12	8.29381	1.00544	12	5.25029	0.984087	12	5.74973	1.05381	12	5.06188	0.943334	12	7.79713	1.06029	12	10.3279	0.930397	12	5.81976	0.957899	12	8.09765	1.05917	12	9.52883	118	13.2333	9.93506
P31399	ATP synthase subunit d, mitochondrial OS=Rattus norvegicus OX=10116 GN=Atp5pd PE=1 SV=3 - [ATP5H_RAT]	170.521	34.78	1	4	4	12	1.009	12	3.20791	1.01071	12	3.74187	0.988439	12	3.47239	1.04639	12	3.05376	1.01053	12	3.14769	1.02501	12	4.75446	0.955705	12	2.5068	0.972372	12	2.6148	0.999835	12	6.47527	161	18.7516	6.59521
B2GUZ9	Fam49b protein OS=Rattus norvegicus OX=10116 GN=Fam49b PE=1 SV=1 - [B2GUZ9_RAT]	170.306	14.2	2	3	4	5	0.950189	4	10.2432	0.995282	4	7.35359	1.01764	4	5.05691	0.976023	4	1.69707	1.03673	4	1.978	0.991677	4	1.07154	1.08111	4	4.36722	1.03465	4	7.94922	0.926023	4	7.03186	324	36.7527	6.06201
D3ZJ08	Histone H3 OS=Rattus norvegicus OX=10116 GN=Hist2h3c2 PE=1 SV=1 - [D3ZJ08_RAT]	170.09	47.06	12	2	13	45	1.22598	5	3.39241	1.24536	5	4.81812	0.983899	5	6.82844	0.908614	5	3.61611	0.987188	5	15.4059	0.891251	5	7.30944	0.918436	5	15.7643	0.958141	5	6.15475	1.15449	5	5.01999	136	15.3785	11.2681
B2RYN6	AP-1 complex subunit gamma OS=Rattus norvegicus OX=10116 GN=Ap1g1 PE=2 SV=1 - [B2RYN6_RAT]	169.409	5.11	2	5	5	7	1.0585	6	5.02848	1.02059	6	4.10027	0.984173	6	2.99766	1.00405	6	2.29736	0.982899	6	6.55358	1.016	6	3.82427	1.00848	6	4.36243	0.968616	6	4.1527	1.03392	6	9.05907	822	91.2921	6.80029
Q5U211	Sorting nexin-3 OS=Rattus norvegicus OX=10116 GN=Snx3 PE=1 SV=1 - [SNX3_RAT]	169.363	39.51	11	5	8	12	0.992484	8	3.37284	0.987712	8	4.20581	0.983052	8	3.27799	1.01977	8	3.20426	1.00365	8	6.37409	1.02579	8	5.72849	0.992907	8	5.11706	0.989846	8	2.89671	1.02646	8	3.86643	162	18.7508	8.66064
Q6Q0N1	Cytosolic non-specific dipeptidase OS=Rattus norvegicus OX=10116 GN=Cndp2 PE=1 SV=1 - [CNDP2_RAT]	169.163	7.16	2	3	3	3	0.966113	3	8.28864	0.967867	3	2.81245	1.02184	3	1.18663	1.06348	3	6.45641	0.987759	3	6.20183	1.03151	3	0.613319	1.00878	3	10.3837	0.912007	3	13.4372	0.953324	3	17.1553	475	52.6596	5.65576
B0BNG3	Lectin, mannose-binding 2 OS=Rattus norvegicus OX=10116 GN=Lman2 PE=1 SV=1 - [B0BNG3_RAT]	169.066	17.32	1	6	6	9	1.0519	9	10.5445	0.965752	9	9.44645	1.00791	9	5.9605	1.01669	9	3.57497	0.986789	9	10.149	1.01973	9	2.83438	0.925157	9	11.0218	0.965186	9	11.1081	1.05301	9	7.89639	358	40.3672	6.94678
G3V9V9	Cysteine and glycine-rich protein 2 OS=Rattus norvegicus OX=10116 GN=Csrp2 PE=1 SV=1 - [G3V9V9_RAT]	169.019	53.37	3	8	10	11	1.13515	9	3.77641	1.14452	9	15.0291	0.934928	9	4.34786	0.923888	9	4.54096	0.919903	9	18.3446	0.945139	9	2.48549	0.93148	9	11.3341	0.955119	9	7.06816	1.28088	9	14.6224	193	20.9118	8.6167
Q9QZ86	Nucleolar protein 58 OS=Rattus norvegicus OX=10116 GN=Nop58 PE=1 SV=1 - [NOP58_RAT]	168.7	16.48	14	7	8	13	0.900351	12	5.98972	0.917136	12	7.64855	1.01493	12	3.92189	1.08161	12	4.11179	1.03534	12	7.56307	1.06695	12	6.61883	1.03356	12	5.62939	1.0278	12	4.23467	0.903236	12	8.14489	534	60.0326	8.51416
G3V8R1	Nucleobindin 2, isoform CRA_b OS=Rattus norvegicus OX=10116 GN=Nucb2 PE=1 SV=1 - [G3V8R1_RAT]	167.945	20.95	2	7	7	8	1.15543	8	9.11042	1.20387	8	11.1713	0.930993	8	4.15105	0.942135	8	4.51954	0.949176	8	5.58335	0.946432	8	4.42904	0.915932	8	3.81951	0.917402	8	6.61402	1.16929	8	6.76023	420	50.0862	5.10986
Q5I0D1	Glyoxalase domain-containing protein 4 OS=Rattus norvegicus OX=10116 GN=Glod4 PE=1 SV=1 - [GLOD4_RAT]	167.72	17.79	1	6	6	8	0.949087	8	2.4905	0.970543	8	2.52264	1.03405	8	4.67814	1.05486	8	3.80425	1.00022	8	5.45502	1.05201	8	3.18387	0.984385	8	5.60274	0.976599	8	8.10372	1.00154	8	7.83163	298	33.2465	5.2749
M0R5M7	Transcription factor BTF3 OS=Rattus norvegicus OX=10116 GN=rCG_63270 PE=3 SV=1 - [M0R5M7_RAT]	167.324	29.01	5	4	6	10	1.05691	7	10.1721	1.09974	7	10.4933	0.927404	7	10.3748	0.970426	7	2.52609	0.910864	7	8.98876	0.980545	7	8.42733	0.92967	7	6.73639	0.93411	7	12.4849	1.15523	7	20.7938	162	17.6732	7.50342
O55096	Dipeptidyl peptidase 3 OS=Rattus norvegicus OX=10116 GN=Dpp3 PE=1 SV=2 - [DPP3_RAT]	166.948	15.04	1	9	9	10	1.05854	10	7.12219	1.08655	10	3.6656	0.974893	10	3.61757	1.00041	10	4.80994	0.9556	10	3.84536	0.997825	10	4.31579	0.949191	10	5.85176	0.986912	10	5.09012	1.09243	10	7.88484	738	82.9869	5.22412
B1WC02	CTP synthase OS=Rattus norvegicus OX=10116 GN=Ctps1 PE=1 SV=1 - [B1WC02_RAT]	166.683	3.72	1	2	2	3	1.08443	3	3.85122	1.02903	3	8.35187	1.07926	3	8.5609	1.08914	3	6.67136	0.814386	3	14.9711	1.10872	3	6.99855	0.830139	3	7.99127	0.87529	3	22.6249	1.04725	3	5.73797	591	66.5981	6.58057
Q5RK17	Diablo homolog, mitochondrial OS=Rattus norvegicus OX=10116 GN=Diablo PE=1 SV=1 - [Q5RK17_RAT]	166.536	15.19	20	3	4	5	0.902405	3	0.923251	0.944753	3	0.857854	1.06468	3	3.66524	0.992448	3	7.18861	1.0384	3	2.32178	1.00194	3	1.18061	1.06871	3	2.48969	1.05187	3	0.918178	0.935288	3	2.67734	237	26.8896	5.73193
B2RYI2	Signal recognition particle subunit SRP68 OS=Rattus norvegicus OX=10116 GN=Srp68 PE=1 SV=1 - [B2RYI2_RAT]	166.417	8	1	5	5	6	0.92435	6	10.3939	0.868069	6	4.74402	1.02157	6	5.76647	1.01458	6	8.22733	1.06653	6	4.40578	0.975622	6	6.20221	1.07715	6	7.74032	1.08462	6	1.39395	0.909663	6	5.44553	625	70.4483	8.57275
P49088	Asparagine synthetase [glutamine-hydrolyzing] OS=Rattus norvegicus OX=10116 GN=Asns PE=2 SV=3 - [ASNS_RAT]	166.352	10.52	4	6	8	9	0.772181	7	24.743	0.75512	7	23.7464	1.12123	7	6.66762	1.1341	7	8.11903	1.11355	7	3.44155	1.14755	7	8.5308	1.08294	7	2.06886	1.10278	7	2.44829	0.76359	7	22.4571	561	64.2055	6.45557
A0A0H2UH90	von Willebrand factor A domain-containing protein 5A OS=Rattus norvegicus OX=10116 GN=Vwa5a PE=1 SV=1 - [A0A0H2UH90_RAT]	166.17	12.06	3	8	9	12	0.891989	11	2.47965	0.900264	11	5.11452	1.05042	11	6.08506	1.08244	11	3.45615	1.00031	11	2.75384	1.07225	11	6.2409	1.00752	11	5.83886	1.01647	11	2.93812	0.898496	11	5.88627	796	88.0229	6.46826
P51635	Aldo-keto reductase family 1 member A1 OS=Rattus norvegicus OX=10116 GN=Akr1a1 PE=1 SV=2 - [AK1A1_RAT]	165.664	16	1	6	6	10	0.847702	10	11.5026	0.864094	10	8.89532	1.03016	10	5.66596	1.05815	10	4.06899	1.03836	10	5.68378	1.06809	10	5.80535	1.0834	10	5.17487	1.04136	10	6.62445	0.883358	10	11.8445	325	36.4829	7.31299
A0A0G2K261	Isoleucyl-tRNA synthetase OS=Rattus norvegicus OX=10116 GN=Iars2 PE=1 SV=1 - [A0A0G2K261_RAT]	165.488	5.93	3	4	4	5	0.931063	5	1.9737	0.993744	5	3.37415	1.0044	5	4.22485	1.02546	5	4.44929	0.995945	5	2.90166	1.09448	5	1.50904	1.0095	5	4.96599	1.01192	5	4.68988	1.00334	5	7.66314	1011	112.605	6.7417
Q63768	Adapter molecule crk OS=Rattus norvegicus OX=10116 GN=Crk PE=1 SV=1 - [CRK_RAT]	165.458	18.42	1	5	5	6	0.994117	6	3.49478	0.986223	6	10.1338	0.996369	6	4.23226	1.02247	6	3.68692	0.98946	6	6.40725	1.04317	6	3.85942	0.998931	6	6.67925	0.964305	6	0.985719	0.991028	6	3.08623	304	33.824	5.5542
P62902	60S ribosomal protein L31 OS=Rattus norvegicus OX=10116 GN=Rpl31 PE=2 SV=1 - [RL31_RAT]	165.362	45.6	21	8	8	14	0.946084	14	9.90112	0.967487	14	10.2	1.03021	14	6.98095	1.02764	14	6.7288	1.01756	14	6.98801	1.00039	14	4.51453	1.05725	14	8.6001	0.974387	14	13.357	0.900367	14	15.7937	125	14.4539	10.5356
Q63584	Transmembrane emp24 domain-containing protein 10 OS=Rattus norvegicus OX=10116 GN=Tmed10 PE=1 SV=2 - [TMEDA_RAT]	165.28	27.85	2	5	8	14	1.01479	10	2.95802	1.06989	10	4.6386	0.976368	10	4.91801	1.01513	10	6.46731	0.993516	10	4.95053	1.00324	10	5.18852	0.97839	10	7.98023	0.938148	10	3.64205	1.01913	10	2.44859	219	24.8418	6.41748
Q3B8P5	26S proteasome non-ATPase regulatory subunit 8 (Fragment) OS=Rattus norvegicus OX=10116 GN=Psmd8 PE=2 SV=1 - [Q3B8P5_RAT]	165.018	14.74	2	4	4	6	1.01194	6	0.665893	1.01235	6	1.69668	0.988393	6	1.42463	1.02761	6	2.56017	1.0026	6	3.31143	1.00914	6	5.10931	0.989772	6	6.42098	0.985364	6	3.89093	0.998584	6	7.27158	285	32.3167	6.37939
B0BN63	Activator of Hsp90 ATPase activity 1 OS=Rattus norvegicus OX=10116 GN=Ahsa1 PE=1 SV=1 - [B0BN63_RAT]	164.767	27.81	3	11	11	13	0.963682	13	3.73267	0.976705	13	6.52288	1.02444	13	7.32768	1.02945	13	5.2146	1.02219	13	7.77818	1.02066	13	8.07129	1.02735	13	12.0538	1.00877	13	4.51926	0.970748	13	7.91592	338	38.0802	5.52881
Q641X3	Beta-hexosaminidase subunit alpha OS=Rattus norvegicus OX=10116 GN=Hexa PE=2 SV=1 - [HEXA_RAT]	164.536	8.14	1	4	4	6	1.1357	5	4.39874	1.14858	5	2.7142	0.935782	5	2.01458	0.953358	5	3.90473	0.947001	5	1.04732	0.968712	5	1.94283	0.968631	5	6.69468	0.957945	5	5.97541	1.19259	5	19.1347	528	60.4994	7.23975
P40112	Proteasome subunit beta type-3 OS=Rattus norvegicus OX=10116 GN=Psmb3 PE=1 SV=1 - [PSB3_RAT]	164.523	14.63	2	3	3	5	0.981808	5	2.58013	0.988557	5	3.04093	0.992034	5	2.78192	1.02767	5	6.91007	1.01528	5	9.94772	1.07196	5	2.89386	1.08563	5	8.42035	0.970755	5	1.50761	0.935095	5	12.3203	205	22.9494	6.55127
Q63190	Emerin OS=Rattus norvegicus OX=10116 GN=Emd PE=1 SV=1 - [EMD_RAT]	164.296	18.08	2	4	4	5	1.00324	5	1.72961	0.9816	5	10.4143	1.0261	5	5.83909	0.989791	5	3.39384	1.04182	5	2.16492	0.990904	5	8.34813	1.05998	5	4.30426	1.01846	5	2.92736	0.913568	5	12.0224	260	29.6574	5.19873
B0BNA7	Eukaryotic translation initiation factor 3 subunit I OS=Rattus norvegicus OX=10116 GN=Eif3i PE=2 SV=1 - [EIF3I_RAT]	164.003	23.69	2	8	8	11	0.970581	11	3.47279	0.951269	11	2.67467	1.0419	11	5.62209	1.01104	11	1.95224	1.01251	11	4.72649	1.02569	11	6.40697	1.05279	11	5.60133	1.01755	11	4.9025	0.914101	11	5.0273	325	36.4376	5.64307
Q6AYH5	Dynactin subunit 2 OS=Rattus norvegicus OX=10116 GN=Dctn2 PE=1 SV=1 - [DCTN2_RAT]	163.857	24.38	2	9	9	10	0.969087	10	9.30451	0.971079	10	6.24652	0.996521	10	5.34679	0.99185	10	2.4773	1.03799	10	5.72908	0.971221	10	3.75916	1.02399	10	5.63769	1.04678	10	5.19336	0.949933	10	11.4529	402	44.1207	5.26221
P00762	Anionic trypsin-1 OS=Rattus norvegicus OX=10116 GN=Prss1 PE=1 SV=1 - [TRY1_RAT]	163.71	8.13	1	1	1	7	1.04086	7	5.70018	1.05228	7	3.27511	0.893246	7	5.28916	0.949366	7	1.65457	1.1053	7	3.11985	0.869724	7	3.77402	1.06562	7	4.18869	1.06144	7	2.31193	1.05337	7	4.80813	246	25.9427	4.89404
Q66HF1	NADH-ubiquinone oxidoreductase 75 kDa subunit, mitochondrial OS=Rattus norvegicus OX=10116 GN=Ndufs1 PE=1 SV=1 - [NDUS1_RAT]	163.544	7.84	1	5	6	8	0.979913	7	6.53597	0.93544	7	2.66821	0.974925	7	2.54762	0.971315	7	8.16001	1.04144	7	3.07091	1.01425	7	2.08812	1.02874	7	8.19458	1.08064	7	9.04047	0.944276	7	11.9836	727	79.3616	5.89697
O88656	Actin-related protein 2/3 complex subunit 1B OS=Rattus norvegicus OX=10116 GN=Arpc1b PE=1 SV=3 - [ARC1B_RAT]	162.957	15.32	2	5	5	7	0.95294	7	2.21957	1.00542	7	6.31394	1.00383	7	3.1746	1.01465	7	6.57085	1.07142	7	5.91641	0.984673	7	7.36574	1.04611	7	6.50958	1.03594	7	3.45353	1.00019	7	7.14803	372	41.0305	8.35303
P20909	Collagen alpha-1(XI) chain OS=Rattus norvegicus OX=10116 GN=Col11a1 PE=1 SV=2 - [COBA1_RAT]	162.768	2.22	5	4	5	7	1.24488	5	5.81825	1.2303	5	8.10386	0.94642	5	2.47022	0.915271	5	2.26192	0.919658	5	5.43285	0.921972	5	2.68992	0.909524	5	2.22816	0.939306	5	2.23247	1.1974	5	2.53822	1804	180.916	5.21143
F1LVV4	Regulator of chromosome condensation 2 OS=Rattus norvegicus OX=10116 GN=Rcc2 PE=1 SV=1 - [F1LVV4_RAT]	162.728	12.65	2	5	6	7	0.799524	6	6.52165	0.790008	6	4.87474	1.0604	6	3.19978	1.11144	6	1.28787	1.02773	6	6.44008	1.12083	6	9.30186	1.04792	6	4.91921	1.08136	6	3.88292	0.787125	6	11.9727	427	46.6224	8.20654
O70509	CD44 antigen OS=Rattus norvegicus OX=10116 GN=Cd44 PE=1 SV=1 - [O70509_RAT]	162.376	7.14	5	2	2	3	0.997093	3	0.358402	0.852584	3	0.943243	0.935516	3	11.9592	0.999652	3	4.39838	1.0908	3	8.90297	0.994882	3	4.83519	1.0495	3	15.8104	1.08948	3	17.969	0.918998	3	15.6335	364	39.7004	5.13525
D4A3K5	Histone H1.1 OS=Rattus norvegicus OX=10116 GN=H1-1 PE=1 SV=1 - [H11_RAT]	162.304	14.49	1	1	5	20	1.24177	4	16.4342	1.30778	4	6.43253	0.854235	4	2.73563	0.937732	4	7.91155	0.883339	4	6.46066	0.921849	4	9.80908	0.817782	4	5.19431	1.00228	4	9.37953	1.23374	4	6.32396	214	21.991	10.9897
A0A096MIS3	Translation initiation factor eIF-2B subunit delta OS=Rattus norvegicus OX=10116 GN=Eif2b4 PE=1 SV=2 - [A0A096MIS3_RAT]	162.282	7.49	2	2	2	4	0.94571	4	5.90721	0.940859	4	9.71052	1.03775	4	0.56485	1.01315	4	5.90952	1.05726	4	2.51101	0.977522	4	6.4087	1.07212	4	13.2789	1.00833	4	6.57756	0.886417	4	5.46309	521	57.487	9.24658
Q5U2U3	Poly [ADP-ribose] polymerase OS=Rattus norvegicus OX=10116 GN=Parp3 PE=1 SV=1 - [Q5U2U3_RAT]	162.135	18.82	1	11	11	11	0.922499	11	8.77907	0.955206	11	9.81169	1.02083	11	3.24798	0.994892	11	11.9931	1.03274	11	9.34295	1.03867	11	7.71683	1.00663	11	11.659	1.04686	11	7.55653	0.918177	11	7.4178	526	58.8317	7.6792
A0A0G2K2R2	Enoyl-CoA delta isomerase 1, mitochondrial OS=Rattus norvegicus OX=10116 GN=Eci1 PE=1 SV=1 - [A0A0G2K2R2_RAT]	161.817	9.35	4	2	2	3	0.999743	3	4.80599	0.962521	3	7.99595	1.01217	3	1.21638	1.0268	3	1.27308	1.00758	3	4.03724	1.00993	3	0.207859	0.977563	3	11.8371	1.00878	3	2.22152	1.01089	3	14.4512	278	30.7684	9.99365
Q9JJ54	Heterogeneous nuclear ribonucleoprotein D0 OS=Rattus norvegicus OX=10116 GN=Hnrnpd PE=1 SV=2 - [HNRPD_RAT]	161.433	16.71	6	8	10	15	1.04366	12	2.95314	1.05548	12	5.99017	1.00138	12	7.99057	1.00219	12	6.1583	1.00372	12	11.0649	0.967458	12	9.89115	0.970537	12	6.12271	0.96755	12	11.5957	1.01418	12	11.4209	353	38.1942	7.81104
A0JPJ7	Obg-like ATPase 1 OS=Rattus norvegicus OX=10116 GN=Ola1 PE=2 SV=1 - [OLA1_RAT]	161.325	16.92	1	7	7	10	0.960325	10	5.71145	0.95681	10	4.30595	1.0374	10	4.81597	1.05342	10	4.90585	0.998972	10	4.24903	1.05635	10	6.90347	1.01343	10	5.74971	1.02107	10	6.20255	0.899966	10	2.91211	396	44.5072	7.76709
A0A0G2JYN3	Leucyl-cystinyl aminopeptidase OS=Rattus norvegicus OX=10116 GN=Lnpep PE=1 SV=1 - [A0A0G2JYN3_RAT]	160.816	8.7	7	6	7	10	0.997097	7	3.82702	1.01025	7	7.03865	1.00453	7	4.65702	1.01055	7	3.65842	0.967843	7	2.16968	1.0411	7	3.55403	0.983628	7	6.11373	0.988286	7	9.45743	1.01899	7	3.09748	1011	115.411	5.5542
A0A0G2JYL4	Procollagen-proline 4-dioxygenase OS=Rattus norvegicus OX=10116 GN=P4ha2 PE=1 SV=1 - [A0A0G2JYL4_RAT]	160.687	12.38	3	5	6	6	1.18954	5	5.2865	1.18231	5	7.62404	0.936525	5	5.10428	0.96549	5	3.85113	0.981066	5	8.53239	0.931562	5	2.78141	0.941254	5	11.2071	0.958358	5	7.53692	1.1543	5	13.4978	533	60.5975	5.99854
Q66H80	Coatomer subunit delta OS=Rattus norvegicus OX=10116 GN=Arcn1 PE=2 SV=1 - [COPD_RAT]	160.614	18.79	3	9	11	12	1.03235	10	10.0438	1.03391	10	8.70349	0.983019	10	4.6298	0.975162	10	3.492	0.992838	10	7.79554	0.996101	10	4.6075	1.00232	10	7.2853	1.00546	10	6.14386	0.996126	10	7.59704	511	57.1632	6.21436
G3V7G0	Dynein light intermediate chain OS=Rattus norvegicus OX=10116 GN=Dync1li1 PE=1 SV=1 - [G3V7G0_RAT]	160.563	21.41	5	10	10	12	0.992492	12	5.96629	0.997646	12	4.18602	1.01565	12	6.44961	0.996871	12	6.582	1.0107	12	6.53046	1.00185	12	7.24879	1.0192	12	8.21625	1.01421	12	7.45401	0.959973	12	10.0908	523	56.6351	6.29053
Q5XIP0	DnaJ (Hsp40) homolog, subfamily B, member 4 OS=Rattus norvegicus OX=10116 GN=Dnajb4 PE=1 SV=1 - [Q5XIP0_RAT]	160.54	13.35	2	3	4	5	0.937194	4	7.51124	0.917238	4	3.71998	1.00114	4	3.33144	1.0748	4	3.0858	0.987583	4	2.87244	1.04187	4	5.27452	0.970671	4	3.68728	1.01175	4	6.16332	1.03369	4	10.0073	337	37.7982	8.5874
Q4KLI7	Splicing factor 3a, subunit 3 OS=Rattus norvegicus OX=10116 GN=Sf3a3 PE=1 SV=1 - [Q4KLI7_RAT]	160.472	11.38	3	5	5	6	1.05293	6	6.64843	1.0458	6	4.21091	0.993624	6	2.42529	1.0104	6	1.87138	0.977126	6	3.97969	0.985557	6	2.89556	1.00857	6	5.97025	0.976726	6	2.99399	1.0128	6	8.51918	501	58.8052	5.33838
P30835	ATP-dependent 6-phosphofructokinase, liver type OS=Rattus norvegicus OX=10116 GN=Pfkl PE=1 SV=3 - [PFKAL_RAT]	160.366	8.08	8	2	7	8	0.840187	1		0.775363	1		1.07029	1		1.04053	1		1.10221	1		1.00969	1		1.1777	1		1.12831	1		0.746376	1		780	85.2844	7.40088
Q6AY23	Pyrroline-5-carboxylate reductase 2 OS=Rattus norvegicus OX=10116 GN=Pycr2 PE=2 SV=1 - [P5CR2_RAT]	160.245	12.5	1	1	3	4	1.05672	1		0.989276	1		0.96637	1		0.991283	1		0.924394	1		1.06745	1		0.938904	1		0.942599	1		1.18944	1		320	33.6516	7.76709
F1LM66	116 kDa U5 small nuclear ribonucleoprotein component OS=Rattus norvegicus OX=10116 GN=Eftud2 PE=1 SV=2 - [F1LM66_RAT]	159.728	10.2	3	9	11	15	1.03765	11	5.56741	1.06487	11	7.44144	0.981176	11	2.33137	1.01103	11	3.92747	1.00454	11	5.20341	0.970794	11	2.7017	0.981269	11	7.23404	1.01142	11	4.36228	1.00618	11	12.0636	971	109.277	4.99561
Q5BJT7	Coiled-coil domain-containing protein 93 OS=Rattus norvegicus OX=10116 GN=Ccdc93 PE=1 SV=1 - [CCD93_RAT]	159.196	6.84	4	3	4	7	1.0408	4	5.29751	1.07707	4	5.15644	1.01861	4	5.86494	0.980853	4	5.12272	0.991649	4	1.40506	0.973178	4	1.53335	0.955647	4	2.77662	0.960447	4	0.589762	1.06607	4	6.51819	629	72.5906	7.60596
D4A5L9	Cytochrome c domain-containing protein OS=Rattus norvegicus OX=10116 PE=3 SV=1 - [D4A5L9_RAT]	159.148	25.71	4	3	4	7	0.951933	6	5.90488	0.961178	6	3.23126	1.09169	6	1.82361	1.12425	6	3.53798	0.953765	6	6.3312	1.08999	6	6.38069	0.926426	6	9.74626	0.905582	6	3.42819	0.929235	6	3.8304	105	11.628	9.5835
A0A096MKH2	Similar to RIKEN cDNA 1110059P08 OS=Rattus norvegicus OX=10116 GN=Vta1 PE=1 SV=1 - [A0A096MKH2_RAT]	159.005	15.86	2	4	4	5	1.00706	5	0.54278	0.995242	5	9.33225	0.984792	5	2.8149	1.01847	5	2.50653	0.968614	5	3.99228	1.06566	5	6.14226	0.987578	5	1.17371	0.970217	5	3.11199	0.979688	5	1.74099	309	33.9539	6.12549
P40307	Proteasome subunit beta type-2 OS=Rattus norvegicus OX=10116 GN=Psmb2 PE=1 SV=1 - [PSB2_RAT]	158.899	18.91	1	3	4	8	1.01314	7	6.81952	1.00035	7	6.02806	0.988212	7	6.04994	1.05319	7	2.16943	0.945961	7	5.89071	1.01125	7	1.52689	0.971022	7	2.33482	0.974321	7	4.10973	1.01843	7	11.6306	201	22.8977	7.44482
Q63798	Proteasome activator complex subunit 2 OS=Rattus norvegicus OX=10116 GN=Psme2 PE=2 SV=3 - [PSME2_RAT]	158.622	21.01	2	5	6	8	1.02404	7	3.23319	1.02375	7	2.67257	1.04043	7	2.7443	1.09544	7	3.279	0.940558	7	3.25291	1.09218	7	3.95558	0.893964	7	3.00638	0.886077	7	7.36218	1.01333	7	6.12665	238	26.84	5.71924
D4A5K6	CAAX prenyl protease OS=Rattus norvegicus OX=10116 GN=Zmpste24 PE=1 SV=1 - [D4A5K6_RAT]	158.31	6.11	1	3	3	6	1.03008	6	1.46077	1.0343	6	1.71521	1.02774	6	7.38328	1.00685	6	1.70011	0.985911	6	3.98407	1.00089	6	1.45924	0.977671	6	3.11214	0.978356	6	2.58249	1.00872	6	5.27537	475	54.8125	7.2251
E9PTW1	Secretory carrier-associated membrane protein OS=Rattus norvegicus OX=10116 GN=Scamp3 PE=1 SV=2 - [E9PTW1_RAT]	158.08	11.14	3	3	3	4	1.05278	4	7.37312	1.02541	4	7.65922	0.992412	4	2.77317	0.997127	4	3.122	0.976734	4	9.26012	0.962299	4	11.9548	0.972023	4	2.00795	0.959701	4	1.71918	1.03833	4	15.7242	350	38.4722	6.75635
D3ZZN4	60S ribosomal protein L35a OS=Rattus norvegicus OX=10116 PE=3 SV=1 - [D3ZZN4_RAT]	158.051	44.55	6	6	6	11	1.04538	11	5.40587	1.054	11	5.22801	1.02044	11	6.08426	1.00398	11	3.11757	0.990268	11	7.61544	1.01432	11	5.31124	0.942011	11	7.85439	0.943455	11	2.66455	1.04507	11	8.66291	110	12.6148	11.0483
Q4KLZ6	Triokinase/FMN cyclase OS=Rattus norvegicus OX=10116 GN=Tkfc PE=1 SV=1 - [TKFC_RAT]	157.783	5.36	1	2	2	4	1.01828	4	6.81274	1.06272	4	6.2543	0.96451	4	2.06567	1.01061	4	1.40451	1.02763	4	11.34	0.933266	4	4.60342	0.98863	4	10.4655	0.993749	4	5.61319	1.03189	4	19.3361	578	59.4063	7.51807
D3ZZC1	RCG43947 OS=Rattus norvegicus OX=10116 GN=Txndc5 PE=1 SV=1 - [D3ZZC1_RAT]	157.574	13.67	1	5	6	7	1.12804	6	4.20073	1.08857	6	4.10395	0.983194	6	3.40019	0.952465	6	3.20554	0.973831	6	5.68093	0.988266	6	6.56309	1.01143	6	6.16481	0.9511	6	2.97716	1.0266	6	4.69497	417	46.324	5.88428
P11240	Cytochrome c oxidase subunit 5A, mitochondrial OS=Rattus norvegicus OX=10116 GN=Cox5a PE=1 SV=1 - [COX5A_RAT]	156.882	28.77	1	5	5	10	0.959971	10	4.17118	0.938129	10	3.42383	1.0036	10	3.9592	1.04649	10	2.6085	1.00899	10	4.16055	1.05736	10	3.74477	0.991585	10	5.0758	0.984275	10	3.75517	0.989147	10	8.47091	146	16.1193	6.53662
Q566E5	Protein O-glucosyltransferase 3 OS=Rattus norvegicus OX=10116 GN=Poglut3 PE=2 SV=1 - [PLGT3_RAT]	156.49	12.8	1	5	5	6	0.9638	6	3.39799	0.959378	6	7.01659	1.01668	6	2.06534	1.01079	6	2.65178	1.032	6	2.51697	0.990323	6	7.46387	1.02249	6	2.07772	1.01828	6	9.49084	0.976462	6	6.71893	508	58.6643	8.30908
Q5M7A4	Ubiquitin-like modifier-activating enzyme 5 OS=Rattus norvegicus OX=10116 GN=Uba5 PE=1 SV=1 - [UBA5_RAT]	156.213	15.38	1	5	5	6	0.958121	6	2.99657	0.916484	6	6.20992	1.02834	6	1.88727	1.02032	6	6.12891	1.0035	6	3.71055	1.03882	6	3.30177	1.04793	6	5.13399	1.03649	6	4.82977	0.961927	6	3.33092	403	44.8661	4.95752
D3ZAZ0	Eukaryotic translation initiation factor 3 subunit M OS=Rattus norvegicus OX=10116 GN=Eif3m PE=1 SV=1 - [D3ZAZ0_RAT]	156.154	11.23	12	5	5	6	1.0503	4	9.79145	1.07407	4	9.3754	1.02152	4	6.70651	0.985137	4	7.3238	0.951245	4	5.06745	1.02751	4	2.25447	0.955064	4	5.95083	0.938824	4	11.8899	1.09584	4	6.22078	374	42.4899	5.74463
A0A0G2K0M1	Kinesin family member 15, isoform CRA_a OS=Rattus norvegicus OX=10116 GN=Kif15 PE=3 SV=1 - [A0A0G2K0M1_RAT]	155.875	3.83	9	3	5	6	1.20029	4	10.5143	1.16292	4	14.6688	0.922792	4	3.46033	0.936085	4	6.2427	0.934313	4	8.86227	0.939941	4	8.325	0.891659	4	5.25613	0.923218	4	12.2179	1.17205	4	16.3639	1385	159.54	5.68115
Q2IBC6	Caveolin OS=Rattus norvegicus OX=10116 GN=Cav1 PE=1 SV=1 - [Q2IBC6_RAT]	155.677	30.34	7	6	6	11	1.19965	11	6.96199	1.13938	11	8.58029	0.955524	11	5.94946	0.939362	11	3.43611	0.97543	11	7.01539	0.920018	11	2.04585	0.950288	11	10.2395	0.957663	11	3.14148	1.12994	11	11.7666	178	20.5385	6.02393
Q6P136	Hyou1 protein OS=Rattus norvegicus OX=10116 GN=Hyou1 PE=1 SV=1 - [Q6P136_RAT]	155.667	9.92	14	8	10	15	1.02884	11	5.25748	1.01734	11	5.02972	0.994674	11	2.8235	1.00963	11	1.54113	0.980009	11	7.94049	0.973117	11	11.069	0.99238	11	7.29009	0.98806	11	7.0209	1.05306	11	10.0704	998	111.151	5.18604
Q5U3Y2	RCG24403, isoform CRA_a OS=Rattus norvegicus OX=10116 GN=Smarcd3 PE=2 SV=1 - [Q5U3Y2_RAT]	155.644	4.89	1	1	1	3	1.11043	3	2.45038	1.03003	3	20.5699	0.96899	3	11.3839	0.871787	3	19.3218	1.02001	3	2.91367	0.963665	3	7.20737	1.03225	3	5.25238	1.07347	3	4.58572	1.0756	3	0.195474	470	53.5816	9.31982
Q923W4	Hepatoma-derived growth factor-related protein 3 OS=Rattus norvegicus OX=10116 GN=Hdgfl3 PE=1 SV=1 - [HDGR3_RAT]	155.627	22.77	1	5	5	8	0.93064	8	6.56031	0.998859	8	4.61199	0.994971	8	3.54919	1.04623	8	3.70421	0.997743	8	7.13613	1.02981	8	1.17792	0.984466	8	4.99402	1.00074	8	4.67908	1.0027	8	6.60588	202	22.4329	8.39697
P08050	Gap junction alpha-1 protein OS=Rattus norvegicus OX=10116 GN=Gja1 PE=1 SV=2 - [CXA1_RAT]	154.774	7.33	2	3	3	5	0.964132	5	3.20086	1.0026	5	2.51082	1.04779	5	5.04249	1.04446	5	5.20017	0.984476	5	10.809	1.04043	5	7.16509	0.988147	5	4.57752	0.936651	5	3.21445	1.02611	5	3.12924	382	43.0039	8.76318
D3ZRN5	Ro60, Y RNA-binding protein OS=Rattus norvegicus OX=10116 GN=Ro60 PE=1 SV=1 - [D3ZRN5_RAT]	154.652	9.11	1	4	4	5	1.01775	5	7.73482	1.0084	5	2.29547	0.979112	5	5.60361	0.979891	5	7.82878	0.995897	5	5.42624	0.991902	5	4.07896	0.976143	5	2.04658	0.994836	5	3.27865	0.995929	5	9.70218	538	60.004	8.06006
D3ZTX0	Transmembrane emp24 domain-containing protein 7 OS=Rattus norvegicus OX=10116 GN=Tmed7 PE=1 SV=1 - [TMED7_RAT]	154.65	13.72	1	3	3	4	1.04272	4	4.83024	1.04774	4	6.48054	1.01654	4	2.1601	1.06455	4	1.91674	0.944233	4	1.3223	1.0709	4	8.32104	0.936436	4	6.42576	0.913219	4	1.00682	1.05927	4	7.72023	226	25.4627	6.88818
Q99PF3	DNA-(apurinic or apyrimidinic site) endonuclease (Fragment) OS=Rattus norvegicus OX=10116 GN=Apex PE=2 SV=1 - [Q99PF3_RAT]	154.48	10.38	2	2	2	3	0.941258	3	0.266096	1.0084	3	1.46336	1.03336	3	2.59954	1.0711	3	0.1868	0.936058	3	10.6096	1.14822	3	1.84448	0.897863	3	2.00751	0.898881	3	3.81589	1.02683	3	0.72719	289	32.3325	8.57275
P14604	Enoyl-CoA hydratase, mitochondrial OS=Rattus norvegicus OX=10116 GN=Echs1 PE=1 SV=1 - [ECHM_RAT]	154.34	16.21	14	5	6	8	0.928504	7	2.76254	0.923045	7	0.952891	1.05291	7	1.13337	1.00985	7	4.845	1.05238	7	3.5183	1.01268	7	6.15851	1.07417	7	5.35383	1.04934	7	6.71801	0.908802	7	18.235	290	31.4962	8.1333
Q811X6	Lambda-crystallin homolog OS=Rattus norvegicus OX=10116 GN=Cryl1 PE=1 SV=3 - [CRYL1_RAT]	154.051	10.97	1	4	4	5	0.989167	5	9.03949	0.964853	5	10.9601	1.03352	5	0.491885	0.985479	5	0.614545	1.05159	5	4.33134	0.995681	5	6.36135	1.05669	5	1.69484	1.02464	5	19.829	0.902279	5	6.63658	319	35.318	6.354
B4F772	Heat shock 70kDa protein 4-like (Predicted), isoform CRA_b OS=Rattus norvegicus OX=10116 GN=Hspa4l PE=1 SV=1 - [B4F772_RAT]	153.958	5.37	4	1	5	7	0.822199	1		0.759201	1		1.12091	1		1.00494	1		1.15796	1		0.981316	1		1.18031	1		1.12981	1		0.726969	1		838	94.1614	5.69385
Q5XII0	Mammalian ependymin-related protein 1 OS=Rattus norvegicus OX=10116 GN=Epdr1 PE=1 SV=1 - [EPDR1_RAT]	153.098	10.71	1	2	2	3	1.07784	3	3.21173	1.06863	3	2.9125	1.0244	3	0.234235	1.00975	3	0.726534	0.954625	3	1.93029	1.0278	3	1.99771	0.960259	3	2.57851	0.958457	3	0.117494	0.973902	3	5.6536	224	25.6229	7.57666
B2RZC6	Ilf2 protein OS=Rattus norvegicus OX=10116 GN=Ilf2 PE=1 SV=1 - [B2RZC6_RAT]	152.899	12.56	3	5	5	8	0.973103	8	5.48325	1.02678	8	5.03434	0.98344	8	5.95084	1.02039	8	3.33287	0.992425	8	2.05396	1.03534	8	4.22284	0.980207	8	4.04928	0.965015	8	2.46178	1.05028	8	9.95668	390	43.0352	5.26221
P63170	Dynein light chain 1, cytoplasmic OS=Rattus norvegicus OX=10116 GN=Dynll1 PE=1 SV=1 - [DYL1_RAT]	152.811	32.58	2	2	2	5	1.06913	5	1.87454	1.10069	5	2.94819	1.01725	5	0.779381	0.990917	5	8.33065	1.00837	5	0.945761	0.96038	5	5.05156	0.956618	5	6.21167	0.976846	5	7.74985	1.01685	5	13.5504	89	10.3591	7.40088
Q5XIU9	Membrane-associated progesterone receptor component 2 OS=Rattus norvegicus OX=10116 GN=Pgrmc2 PE=1 SV=1 - [PGRC2_RAT]	152.538	28.11	2	4	5	8	0.931287	6	16.5314	0.942578	6	17.6613	1.06801	6	8.18623	1.06214	6	7.24052	0.984763	6	8.67807	1.04418	6	8.38243	0.983855	6	8.27215	0.959441	6	3.32263	0.932249	6	4.15839	217	23.3887	5.26221
A0A0G2JSM7	Adducin 1 (Alpha), isoform CRA_b OS=Rattus norvegicus OX=10116 GN=Add1 PE=1 SV=1 - [A0A0G2JSM7_RAT]	152.162	7.89	3	4	4	5	0.897214	5	6.6915	0.922262	5	3.32887	0.971208	5	1.99974	0.977514	5	3.63302	1.09845	5	7.96117	0.999874	5	1.85246	1.07928	5	10.1456	1.05069	5	5.40155	0.941263	5	6.39391	735	80.2893	6.15088
A0A0G2JVZ6	Integrin subunit alpha V OS=Rattus norvegicus OX=10116 GN=Itgav PE=1 SV=1 - [A0A0G2JVZ6_RAT]	151.295	7.89	2	8	9	12	1.11697	10	7.09672	1.09249	10	6.48283	0.950458	10	6.62427	0.957092	10	1.41876	0.959358	10	2.91948	0.95814	10	5.00016	0.957073	10	10.7792	0.957729	10	5.65263	1.10468	10	12.9539	1052	115.737	5.74463
F8WG67	Acyl-CoA thioesterase 7, isoform CRA_a OS=Rattus norvegicus OX=10116 GN=Acot7 PE=1 SV=2 - [F8WG67_RAT]	151.159	12.1	2	3	3	5	0.973475	5	12.1097	0.973985	5	6.63226	0.99154	5	1.29658	1.06097	5	9.32158	0.991916	5	7.29097	0.9999	5	1.69324	1.05228	5	4.59151	1.03018	5	4.34985	0.979726	5	1.9423	372	40.942	7.73779
Q4QR80	28S ribosomal protein S25, mitochondrial OS=Rattus norvegicus OX=10116 GN=Mrps25 PE=2 SV=1 - [RT25_RAT]	151.153	24.56	1	4	4	6	0.974892	6	2.1801	0.981857	6	5.50705	1.01392	6	4.52956	1.00148	6	2.07403	1.00385	6	3.01128	1.01006	6	3.24885	1.0384	6	8.60089	1.01739	6	1.05591	1.00987	6	5.47584	171	19.7622	8.99756
B2RYG6	Ubiquitin thioesterase OTUB1 OS=Rattus norvegicus OX=10116 GN=Otub1 PE=1 SV=1 - [OTUB1_RAT]	151.137	13.65	2	4	4	6	0.988635	5	5.6089	0.988813	5	10.4744	0.999391	5	1.28291	1.03846	5	4.20511	0.963748	5	7.8841	1.06217	5	2.20159	0.920469	5	8.40925	1.00391	5	11.2915	1.02469	5	7.67028	271	31.2504	4.94482
Q8CIY7	11beta-hydroxysteroid dehydrogenase type 1 (Fragment) OS=Rattus norvegicus OX=10116 PE=2 SV=1 - [Q8CIY7_RAT]	150.962	15.87	3	4	4	7	1.16051	7	14.9676	1.15725	7	13.0072	0.971635	7	5.15072	0.99495	7	4.57968	0.97526	7	17.4539	0.981371	7	8.20722	0.93248	7	16.5141	0.926337	7	15.8153	1.08092	7	17.7065	252	27.5593	7.92822
P61972	Nuclear transport factor 2 OS=Rattus norvegicus OX=10116 GN=Nutf2 PE=1 SV=1 - [NTF2_RAT]	150.822	22.05	2	3	3	6	0.990978	6	4.47122	1.04512	6	4.24147	1.01724	6	3.25336	1.01475	6	4.55805	0.994834	6	4.83848	0.986693	6	5.71949	1.00228	6	3.33186	1.0004	6	2.83482	0.937663	6	5.92265	127	14.469	5.37646
O35964	Endophilin-A2 OS=Rattus norvegicus OX=10116 GN=Sh3gl1 PE=1 SV=1 - [SH3G1_RAT]	150.542	11.41	2	4	4	5	1.06171	5	2.7947	1.03491	5	14.0368	1.0183	5	1.3805	0.999673	5	1.76687	0.982152	5	5.77882	0.986673	5	1.79511	0.981484	5	5.84093	0.993845	5	1.22754	1.01328	5	7.21743	368	41.4662	5.60498
F1LQ92	Protein sel-1 homolog 1 OS=Rattus norvegicus OX=10116 GN=Sel1l PE=1 SV=1 - [F1LQ92_RAT]	150.339	4.67	3	3	3	5	0.958507	5	5.69083	0.999018	5	11.7092	1.01868	5	5.83867	0.963766	5	6.48222	1.01468	5	3.467	1.01604	5	6.26522	1.07539	5	5.13239	0.977712	5	10.4182	0.948974	5	10.5268	792	88.3858	5.56689
D4A994	ER membrane protein complex subunit 1 OS=Rattus norvegicus OX=10116 GN=Emc1 PE=1 SV=1 - [D4A994_RAT]	150.258	2.32	1	2	2	3	0.963627	3	12.9243	0.939973	3	5.817	1.04256	3	7.02938	1.04169	3	1.33073	1.03616	3	2.77532	0.996081	3	2.01302	1.03112	3	12.6943	1.02047	3	9.52691	0.883636	3	11.7318	993	111.115	7.31299
D3ZD11	Microsomal signal peptidase 25 kDa subunit OS=Rattus norvegicus OX=10116 GN=Spcs2 PE=1 SV=1 - [D3ZD11_RAT]	150.222	26.55	7	5	6	6	0.996537	5	6.4411	0.961874	5	7.35263	0.979461	5	2.62004	1.01319	5	5.14852	1.04069	5	1.60963	0.977546	5	2.67636	1.0163	5	4.83759	1.05201	5	1.05883	1.00668	5	6.88502	226	24.9577	8.57275
A0A0G2K277	Enoyl-CoA delta isomerase 2 OS=Rattus norvegicus OX=10116 GN=Eci3 PE=1 SV=1 - [A0A0G2K277_RAT]	150.213	14.25	2	3	5	6	0.950944	4	1.82209	0.976366	4	2.11192	1.02419	4	1.50154	1.01909	4	4.15661	1.02106	4	3.63484	1.0626	4	2.71353	1.03424	4	6.65838	0.986001	4	4.5828	0.909242	4	6.62143	379	42.2977	9.0708
Q6AYK6	Calcyclin-binding protein OS=Rattus norvegicus OX=10116 GN=Cacybp PE=1 SV=1 - [CYBP_RAT]	150.097	30.57	7	6	7	11	1.07467	10	2.72119	1.06023	10	5.30567	0.964432	10	4.31561	0.990411	10	4.37488	0.9726	10	4.41401	1.00654	10	3.85104	0.953224	10	7.38401	0.972799	10	7.7998	1.04567	10	11.9374	229	26.5247	7.86963
Q66WT9	Clathrin-assembly lymphoid myeloid leukemia protein OS=Rattus norvegicus OX=10116 GN=Picalm PE=1 SV=1 - [Q66WT9_RAT]	149.813	11.56	6	6	6	7	0.946376	7	5.99057	0.985531	7	4.55571	0.996466	7	3.83959	0.978209	7	6.01169	1.05101	7	4.40016	1.0046	7	3.61212	0.992415	7	9.25721	1.03329	7	2.61755	0.936799	7	6.66109	597	64.6731	9.01221
P08430	UDP-glucuronosyltransferase 1-6 OS=Rattus norvegicus OX=10116 GN=Ugt1a6 PE=1 SV=1 - [UD16_RAT]	149.8	9.26	39	4	5	6	0.899374	4	12.3166	0.918664	4	5.80731	1.05916	4	3.82125	1.0193	4	7.43044	1.01413	4	8.85217	1.01703	4	9.11228	1.03906	4	12.0582	1.07337	4	5.99163	0.880626	4	9.84846	529	60.0929	8.68994
Q5PPP1	Clathrin light chain OS=Rattus norvegicus OX=10116 GN=Clta PE=2 SV=1 - [Q5PPP1_RAT]	149.7	22.94	3	4	5	7	1.01065	5	3.60404	0.999108	5	2.61524	0.97858	5	4.11138	1.01238	5	3.96757	1.07476	5	2.70095	1.02679	5	4.32832	1.02105	5	2.29725	1.00998	5	6.02316	0.962602	5	7.31107	218	23.5514	4.50049
Q07984	Translocon-associated protein subunit delta OS=Rattus norvegicus OX=10116 GN=Ssr4 PE=2 SV=1 - [SSRD_RAT]	149.66	7.51	1	1	1	2	1.06554	2	0.14616	1.07508	2	1.4449	0.954014	2	1.2612	1.05886	2	3.2078	0.971246	2	3.92591	1.03222	2	1.02647	0.942128	2	1.0767	0.914272	2	2.80929	1.04085	2	2.93127	173	18.9675	5.78271
B5DEQ4	RCG27500, isoform CRA_c OS=Rattus norvegicus OX=10116 GN=Snrpb2 PE=1 SV=1 - [B5DEQ4_RAT]	149.194	13.78	8	1	3	5	0.906747	2	3.02066	0.920681	2	4.36716	0.988163	2	0.0963102	0.908233	2	10.039	1.13297	2	5.57876	0.972016	2	8.08896	1.14006	2	17.2566	1.16006	2	1.51502	0.86735	2	2.67675	225	25.336	9.71533
Q642E2	60S ribosomal protein L28 OS=Rattus norvegicus OX=10116 GN=Rpl28 PE=2 SV=1 - [Q642E2_RAT]	148.742	42.34	22	8	9	14	0.97753	13	8.91346	0.987867	13	7.07499	1.05758	13	6.58632	0.998532	13	4.15658	1.0052	13	5.86923	1.00967	13	4.46241	1.05017	13	6.23218	0.986235	13	11.3247	0.923332	13	10.4597	137	15.7237	12.0151
A0A0U5JAB7	Tumor necrosis factor ligand 2a OS=Rattus norvegicus OX=10116 GN=Tnlg2a PE=2 SV=1 - [A0A0U5JAB7_RAT]	148.421	11.54	2	2	2	3	0.99882	3	5.52087	0.971068	3	1.89013	1.04057	3	1.79917	1.04329	3	2.19928	0.924918	3	4.29631	1.05629	3	2.43934	0.979979	3	0.981638	0.985716	3	7.9819	0.952907	3	9.73034	156	17.6058	5.04639
G3V8E2	Striatin-interacting protein 1 OS=Rattus norvegicus OX=10116 GN=Strip1 PE=1 SV=2 - [G3V8E2_RAT]	148.295	2.35	1	1	1	4	1.03541	4	13.3124	0.98447	4	13.6105	1.03632	4	8.81712	0.850552	4	3.89992	1.05596	4	0.623736	0.950108	4	3.59217	1.08571	4	7.82032	1.10008	4	6.9057	0.898728	4	9.22286	892	101.521	6.59521
Q56R18	Importin subunit alpha OS=Rattus norvegicus OX=10116 GN=Kpna3 PE=1 SV=1 - [Q56R18_RAT]	148.247	10.36	2	2	6	8	0.920421	4	3.90175	0.943815	4	9.05189	1.04695	4	4.31779	0.918064	4	10.0861	1.03444	4	3.06726	0.922098	4	17.1827	1.08875	4	2.21125	1.07173	4	6.99205	0.87497	4	18.3053	521	57.7368	4.94482
F1M949	Cytoskeleton-associated protein 5 OS=Rattus norvegicus OX=10116 GN=Ckap5 PE=1 SV=3 - [F1M949_RAT]	148.094	3.59	6	6	8	12	1.07408	9	11.7872	0.998082	9	11.8079	0.979074	9	7.55401	0.960957	9	7.81912	1.00015	9	10.4017	0.93535	9	8.34499	1.0188	9	8.51282	0.977385	9	7.87431	1.05964	9	15.8241	1698	187.801	8.11865
G3V7Y3	ATP synthase F1 subunit delta OS=Rattus norvegicus OX=10116 GN=Atp5f1d PE=1 SV=1 - [G3V7Y3_RAT]	147.78	17.26	2	3	3	6	0.989137	6	1.55232	0.973465	6	3.69871	1.00468	6	2.66825	1.03232	6	0.580848	1.02573	6	2.06929	1.00789	6	3.58137	1.01637	6	2.28249	0.982185	6	2.4131	0.934906	6	3.09274	168	17.5522	5.23682
A0A0H2UHU0	40S ribosomal protein S25 OS=Rattus norvegicus OX=10116 GN=Rps25 PE=3 SV=1 - [A0A0H2UHU0_RAT]	147.766	50	9	9	9	14	1.00418	14	9.52797	1.01186	14	4.40374	1.02451	14	5.14995	1.02155	14	4.76251	0.996292	14	4.6754	1.01074	14	2.63556	0.964487	14	5.29257	0.958886	14	5.22778	0.983398	14	6.80222	124	13.6027	10.1108
Q9JHL4	Drebrin-like protein OS=Rattus norvegicus OX=10116 GN=Dbnl PE=1 SV=1 - [DBNL_RAT]	147.126	11.24	1	4	4	5	1.05717	5	3.156	1.12535	5	2.16334	0.931131	5	2.65834	0.969995	5	1.905	0.986685	5	6.18958	0.999272	5	3.10018	0.929768	5	3.38567	0.915079	5	4.66082	1.16274	5	3.14606	436	48.5825	4.91943
Q4KM65	Cleavage and polyadenylation specificity factor subunit 5 OS=Rattus norvegicus OX=10116 GN=Nudt21 PE=2 SV=1 - [CPSF5_RAT]	147.087	19.82	1	4	4	6	1.07272	6	9.05873	0.996579	6	6.23334	0.984217	6	8.03582	0.984395	6	10.6789	1.07854	6	18.3532	1.00373	6	4.00521	1.02447	6	6.7095	0.97111	6	11.2122	0.925496	6	22.5253	227	26.2237	8.82178
A0A0G2QBZ8	LUC7-like (S. cerevisiae) OS=Rattus norvegicus OX=10116 GN=Luc7l PE=2 SV=1 - [A0A0G2QBZ8_RAT]	146.793	13.97	4	1	4	5	1.02351	2	4.7305	0.992602	2	3.21347	0.990979	2	5.5526	0.990759	2	0.875688	0.999524	2	6.17914	1.02214	2	0.948561	0.965516	2	0.422787	0.971826	2	2.53525	1.08965	2	4.36635	272	32.5039	10.2427
P29524	Plasminogen activator inhibitor 2 type A OS=Rattus norvegicus OX=10116 GN=Serpinb2 PE=2 SV=1 - [PAI2_RAT]	146.786	19.47	1	8	8	11	0.974181	11	6.11673	0.957008	11	2.53769	1.02025	11	4.07156	1.04246	11	4.00855	0.960724	11	6.21404	1.08071	11	4.75962	1.00804	11	9.04237	0.963572	11	5.02135	0.961906	11	6.58411	416	47.2177	5.35107
Q66HD3	Nuclear autoantigenic sperm protein OS=Rattus norvegicus OX=10116 GN=Nasp PE=1 SV=1 - [NASP_RAT]	146.68	5.41	1	4	4	5	1.09583	5	0.685953	1.05634	5	11.0589	0.97159	5	8.24267	0.920153	5	9.96772	0.993223	5	4.01944	0.944412	5	10.4663	0.978697	5	6.53569	1.00255	5	9.88722	1.07582	5	8.86688	776	84.1486	4.33545
D3Z8E0	Ribosomal protein S6 kinase OS=Rattus norvegicus OX=10116 GN=Rps6ka3 PE=1 SV=2 - [D3Z8E0_RAT]	146.574	8.51	3	5	5	6	1.03395	6	2.48596	1.07802	6	8.4229	0.977901	6	5.21203	0.963518	6	3.52031	0.997992	6	3.22018	0.980582	6	4.70832	0.981501	6	8.55875	1.04136	6	3.91317	1.03516	6	12.1101	740	83.6709	6.88818
D3ZUD8	Transmembrane 9 superfamily member OS=Rattus norvegicus OX=10116 GN=Tm9sf3 PE=1 SV=2 - [D3ZUD8_RAT]	146.273	10.51	3	7	7	10	1.04318	10	2.26231	1.05878	10	5.70529	0.979811	10	7.25378	1.00079	10	5.03323	0.974306	10	8.94407	1.0043	10	5.48409	0.963336	10	7.81807	0.931083	10	7.99609	1.07481	10	7.69065	609	69.9228	7.37158
Q64560	Tripeptidyl-peptidase 2 OS=Rattus norvegicus OX=10116 GN=Tpp2 PE=2 SV=3 - [TPP2_RAT]	146.141	5.2	1	6	6	6	1.02972	6	3.65049	1.03874	6	8.71588	1.00332	6	4.06621	1.01542	6	2.40926	0.974897	6	6.10195	1.01878	6	1.74888	0.997323	6	4.3327	1.01494	6	2.71079	1.01862	6	12.1861	1249	138.206	6.37939
B0BN94	Protein FAM136A OS=Rattus norvegicus OX=10116 GN=Fam136a PE=1 SV=1 - [F136A_RAT]	146.115	23.19	1	2	2	2	0.840819	2	16.9996	0.891383	2	11.0324	1.09582	2	11.8248	0.97768	2	0.683366	1.10819	2	11.8043	0.990583	2	13.7667	1.14241	2	11.6388	1.03583	2	4.29002	0.826896	2	16.2311	138	15.6146	7.60596
P53812	Phosphatidylinositol transfer protein beta isoform OS=Rattus norvegicus OX=10116 GN=Pitpnb PE=1 SV=2 - [PIPNB_RAT]	145.684	14.39	2	3	4	4	0.942787	3	1.94345	0.92418	3	3.54626	1.03335	3	0.79696	1.02508	3	0.79858	1.05984	3	4.28776	0.950387	3	0.0529992	1.01848	3	7.09036	1.08	3	3.36992	0.899615	3	4.24112	271	31.4299	6.87354
P40241	CD9 antigen OS=Rattus norvegicus OX=10116 GN=Cd9 PE=1 SV=2 - [CD9_RAT]	145.587	10.18	1	3	3	6	1.06203	6	13.4555	1.12109	6	10.4639	0.975606	6	1.17187	1.00032	6	2.57406	0.955569	6	10.9032	1.02033	6	5.2858	0.963934	6	10.9468	0.939675	6	7.66269	1.06084	6	7.93993	226	25.1979	7.26904
A0A0F7R5I4	Alanine/serine/cysteine/threonine transporter 1 OS=Rattus norvegicus OX=10116 GN=ratASCT1 PE=2 SV=1 - [A0A0F7R5I4_RAT]	145.45	10.21	2	4	4	5	0.673963	5	0.302847	0.756973	5	5.75086	1.09146	5	8.04502	1.11846	5	6.39232	1.099	5	3.06069	1.06222	5	4.95753	1.07482	5	0.520811	1.06639	5	3.69019	0.815163	5	26.1475	529	55.8187	6.11279
A0JN30	Canopy 2 homolog (Zebrafish) OS=Rattus norvegicus OX=10116 GN=Cnpy2 PE=1 SV=1 - [A0JN30_RAT]	145.401	17.58	1	3	3	5	0.97687	5	5.15849	0.982028	5	4.4222	1.01464	5	6.08209	1.02191	5	1.24249	1.00384	5	1.29268	1.0334	5	2.25164	0.967527	5	3.61524	1.04309	5	4.64732	0.935201	5	14.1368	182	20.6963	5.13525
A8IRI3	Glucocorticoid receptor OS=Rattus norvegicus OX=10116 GN=gr PE=2 SV=1 - [A8IRI3_RAT]	144.793	5.29	4	1	2	4	0.955198	3	10.0884	1.0343	3	19.5015	0.963937	3	5.12519	0.958609	3	8.63345	1.01027	3	15.7816	0.973529	3	11.5412	0.940125	3	11.4093	1.01113	3	6.47459	1.12559	3	17.9196	794	87.5485	6.78564
Q05759	cAMP-dependent protein kinase catalytic subunit beta (Fragment) OS=Rattus norvegicus OX=10116 PE=2 SV=1 - [Q05759_RAT]	144.6	9.58	4	1	4	7	1.04332	1		1.07794	1		0.912606	1		0.966099	1		0.970324	1		1.05617	1		0.985553	1		1.00299	1		1.06602	1		334	38.9962	8.23584
P53042	Serine/threonine-protein phosphatase 5 OS=Rattus norvegicus OX=10116 GN=Ppp5c PE=1 SV=1 - [PPP5_RAT]	144.568	8.22	4	3	3	4	0.916468	4	2.25469	0.942563	4	6.62125	1.03523	4	0.825677	1.0357	4	1.56185	1.03403	4	5.82301	1.01024	4	3.26123	1.03258	4	1.72954	0.988742	4	3.62252	0.954476	4	0.554384	499	56.8802	6.20166
B5DES0	Small nuclear ribonucleoprotein Sm D2 OS=Rattus norvegicus OX=10116 GN=Snrpd2 PE=1 SV=1 - [B5DES0_RAT]	144.536	58.47	2	7	7	7	1.01244	7	7.72572	0.923479	7	9.67491	1.03725	7	5.01702	0.997777	7	6.13641	0.999126	7	8.34122	1.01258	7	4.40907	0.994645	7	7.88076	1.01748	7	11.0227	0.924223	7	16.4965	118	13.5182	9.90576
D4ACN8	Plasminogen receptor (KT) OS=Rattus norvegicus OX=10116 GN=Plgrkt PE=1 SV=1 - [PLRKT_RAT]	144.413	14.29	1	2	2	3	1.0297	3	5.69051	1.06013	3	9.19821	0.961471	3	0.37441	1.01372	3	0.532406	0.982917	3	1.71618	1.00929	3	0.484009	0.998474	3	0.115517	0.941318	3	7.95209	1.002	3	7.67453	147	17.301	9.49561
P85971	6-phosphogluconolactonase OS=Rattus norvegicus OX=10116 GN=Pgls PE=1 SV=1 - [6PGL_RAT]	144.242	25.29	2	5	5	9	0.934069	9	4.77668	0.928395	9	4.70671	1.02298	9	1.82967	1.04168	9	4.26219	1.02108	9	6.8972	1.04037	9	3.3509	1.00886	9	7.65958	1.02579	9	3.5169	0.936717	9	5.33781	257	27.2173	5.84619
Q5XI19	Fermitin family homolog 2 (Drosophila) OS=Rattus norvegicus OX=10116 GN=Fermt2 PE=1 SV=1 - [Q5XI19_RAT]	144.149	13.24	5	8	8	10	1.04035	10	6.19326	1.03563	10	3.77705	0.990073	10	2.82911	1.023	10	2.64487	0.992715	10	7.35805	1.01296	10	5.47798	0.961583	10	5.21111	0.998903	10	5.66208	1.05024	10	7.34403	680	77.8255	6.69775
Q499N6	UBX domain-containing protein 1 OS=Rattus norvegicus OX=10116 GN=Ubxn1 PE=3 SV=2 - [UBXN1_RAT]	143.711	23.23	21	5	6	7	0.925485	6	9.81247	0.918422	6	7.0647	1.00364	6	3.06192	1.04198	6	2.51472	1.02146	6	2.88855	1.02884	6	4.10239	1.03692	6	3.90094	0.979114	6	7.53563	1.00881	6	9.62441	297	33.5611	5.26221
A1A5S1	Pre-mRNA-processing factor 6 OS=Rattus norvegicus OX=10116 GN=Prpf6 PE=1 SV=1 - [PRP6_RAT]	143.65	2.98	1	3	3	4	0.932294	4	11.3218	0.954874	4	4.14036	1.02194	4	5.47904	0.960175	4	5.44821	0.990149	4	8.07389	0.928567	4	10.8456	1.06069	4	13.5089	0.97701	4	6.08697	0.994141	4	6.60754	941	106.697	8.08936
Q5U2Q7	Eukaryotic peptide chain release factor subunit 1 OS=Rattus norvegicus OX=10116 GN=Etf1 PE=2 SV=3 - [ERF1_RAT]	143.636	17.39	1	7	8	9	0.95935	8	9.86051	0.918581	8	6.89991	1.02857	8	3.58496	1.03843	8	6.51677	1.06991	8	2.43751	1.03665	8	6.73625	1.05524	8	5.71859	1.05664	8	3.46892	0.93706	8	8.34464	437	49.0002	5.70654
A0A0G2KAJ7	Collagen alpha-1(XII) chain OS=Rattus norvegicus OX=10116 GN=Col12a1 PE=1 SV=1 - [A0A0G2KAJ7_RAT]	143.618	3.12	10	10	12	15	1.27611	10	6.82993	1.28276	10	5.65502	0.86391	10	5.04623	0.886324	10	5.35164	0.893607	10	7.14458	0.896237	10	7.11095	0.923117	10	8.16808	0.933522	10	9.14869	1.30812	10	9.11284	3143	342.315	5.64307
B2RZ74	U1 small nuclear ribonucleoprotein 70 kDa OS=Rattus norvegicus OX=10116 GN=Snrnp70 PE=1 SV=1 - [B2RZ74_RAT]	143.423	10.42	2	5	5	8	0.995491	8	4.58941	1.01208	8	7.12979	0.989829	8	2.86274	1.00431	8	3.4155	1.00785	8	7.79816	0.979999	8	5.81816	1.06893	8	10.177	1.03661	8	3.42816	0.973357	8	6.91424	451	52.102	9.93506
Q6AXS3	Protein DEK OS=Rattus norvegicus OX=10116 GN=Dek PE=1 SV=1 - [DEK_RAT]	143.212	23.02	1	9	9	9	1.10463	9	8.23127	1.10961	9	4.60116	0.948909	9	2.68616	0.964928	9	1.78004	0.983026	9	10.2305	0.932023	9	3.59675	0.96589	9	11.5891	0.971643	9	11.0577	1.08663	9	11.8649	378	42.8659	7.69385
Q4KLN7	ADP-ribosylation factor GTPase-activating protein 3 OS=Rattus norvegicus OX=10116 GN=Arfgap3 PE=1 SV=1 - [ARFG3_RAT]	143.056	13.52	6	7	10	12	0.989356	8	13.1839	0.981097	8	12.9569	0.973308	8	6.85875	0.983527	8	5.44906	0.991809	8	12.1629	0.990364	8	6.29254	0.984469	8	16.933	0.981754	8	13.5758	0.985781	8	19.7289	525	57.6353	8.35303
B5DEY8	Sorting nexin OS=Rattus norvegicus OX=10116 GN=Snx6 PE=1 SV=1 - [B5DEY8_RAT]	143.056	21.92	3	9	9	10	0.999498	9	7.41992	1.0027	9	8.031	0.999144	9	1.88165	1.03873	9	2.92864	0.970361	9	3.21996	1.02186	9	3.64202	0.988405	9	5.83715	1.00552	9	3.59632	1.00666	9	9.359	406	46.6077	6.16357
D3ZF12	Signal peptidase complex subunit 3 OS=Rattus norvegicus OX=10116 GN=Spcs3 PE=1 SV=1 - [D3ZF12_RAT]	143.04	6.67	1	1	1	2	0.962063	2	0.731125	0.953169	2	0.946275	1.02843	2	1.70176	0.930167	2	0.274876	1.12654	2	4.64109	0.912079	2	0.516152	1.14215	2	0.719699	1.08762	2	4.50009	0.885892	2	3.90921	180	20.3146	8.6167
F1LU48	Endoplasmic reticulum-golgi intermediate compartment 1 OS=Rattus norvegicus OX=10116 GN=Ergic1 PE=1 SV=2 - [F1LU48_RAT]	142.497	13.74	1	3	3	5	0.923918	5	6.86156	0.922954	5	11.4067	1.01208	5	8.32434	1.07635	5	6.07501	0.980895	5	11.3333	1.1316	5	8.83158	0.933231	5	3.53091	0.979236	5	10.0574	0.900485	5	8.67588	313	34.9889	7.26904
P13086	Succinate--CoA ligase [ADP/GDP-forming] subunit alpha, mitochondrial OS=Rattus norvegicus OX=10116 GN=Suclg1 PE=2 SV=2 - [SUCA_RAT]	142.48	17.05	3	5	5	7	0.942378	7	6.14253	0.979181	7	8.68055	1.03	7	3.93939	1.02555	7	5.01053	0.981844	7	10.1108	1.08306	7	6.99262	0.979378	7	10.09	0.975062	7	11.0771	0.995285	7	6.24279	346	36.125	9.48096
B0BN74	Bag2 protein OS=Rattus norvegicus OX=10116 GN=Bag2 PE=2 SV=1 - [B0BN74_RAT]	142.337	35.24	3	8	9	11	0.948003	10	6.35256	0.966535	10	5.15212	1.02159	10	3.70201	1.00813	10	1.35945	1.07949	10	6.57058	1.00994	10	4.00234	1.02223	10	1.46545	1.07406	10	4.82725	0.914198	10	6.36472	210	23.5611	6.41748
Q5HZA7	Bin1 protein OS=Rattus norvegicus OX=10116 GN=Bin1 PE=1 SV=1 - [Q5HZA7_RAT]	142.172	16.34	4	5	5	6	0.942423	6	13.6931	0.986099	6	12.8021	0.992512	6	5.84297	0.985397	6	2.30657	0.99377	6	2.87958	1.02905	6	4.09242	1.02209	6	1.90169	0.987147	6	2.60333	1.03143	6	6.51098	410	45.8049	5.41455
Q6AYK1	RNA-binding protein with serine-rich domain 1 OS=Rattus norvegicus OX=10116 GN=Rnps1 PE=2 SV=1 - [RNPS1_RAT]	142.109	4.92	1	1	1	2	1.14964	2	5.03558	1.18373	2	0.573478	0.880627	2	1.19198	0.956243	2	6.20573	0.906231	2	0.232205	1.01908	2	0.492419	0.932195	2	1.77595	0.936721	2	6.18957	1.19401	2	3.6925	305	34.2177	11.8394
Q5RJQ4	NAD-dependent protein deacetylase sirtuin-2 OS=Rattus norvegicus OX=10116 GN=Sirt2 PE=1 SV=1 - [SIR2_RAT]	142.081	7.14	2	2	2	3	0.88652	3	7.3202	0.883882	3	0.972253	1.01903	3	3.10935	1.07583	3	0.649658	1.042	3	4.21502	1.06653	3	4.20343	1.06966	3	1.66164	1.03758	3	4.08833	0.918449	3	3.65941	350	39.2938	7.07861
P61751	ADP-ribosylation factor 4 OS=Rattus norvegicus OX=10116 GN=Arf4 PE=2 SV=2 - [ARF4_RAT]	141.606	13.89	1	2	2	4	1.02273	4	3.24336	1.05053	4	6.70876	0.988021	4	1.84768	1.00378	4	1.70115	0.999442	4	1.58616	0.984176	4	3.13173	0.966331	4	4.64193	0.967824	4	3.59134	1.02595	4	2.73717	180	20.3836	7.13721
A0A0G2KAN7	Glutaminase OS=Rattus norvegicus OX=10116 GN=Gls PE=1 SV=1 - [A0A0G2KAN7_RAT]	141.439	13.79	6	1	7	7	0.9038	1		0.953817	1		0.945542	1		1.03032	1		1.02975	1		1.13101	1		1.07559	1		0.963903	1		0.935629	1		602	65.7961	8.11865
A0A0G2JWD6	AP-3 complex subunit beta OS=Rattus norvegicus OX=10116 GN=Ap3b1 PE=1 SV=1 - [A0A0G2JWD6_RAT]	141.231	2.92	2	3	3	5	1.03427	5	0.529615	1.01731	5	4.87984	1.00393	5	0.979925	0.988249	5	3.94226	0.972013	5	3.12491	1.00403	5	3.35912	1.00244	5	1.30668	1.01241	5	3.08765	0.974768	5	5.95073	1096	121.425	5.99854
Q5FWT1	Protein FAM98A OS=Rattus norvegicus OX=10116 GN=Fam98a PE=2 SV=1 - [FA98A_RAT]	141.209	7.96	3	2	4	4	0.999522	2	0.0594543	1.00438	2	1.88853	0.971779	2	0.045198	1.01171	2	7.10799	0.993507	2	2.83678	1.06294	2	1.40795	0.956716	2	1.18756	0.984492	2	2.97922	1.0412	2	1.86861	515	55.0362	8.90967
Q05BA4	Myadm protein OS=Rattus norvegicus OX=10116 GN=Myadm PE=1 SV=1 - [Q05BA4_RAT]	141.065	17.3	2	5	6	10	0.943461	9	16.1827	0.953106	9	9.10885	1.00183	9	5.2206	0.929296	9	6.80193	1.06972	9	6.19621	0.939194	9	7.03156	1.13847	9	16.8903	1.0027	9	14.598	1.0001	9	23.5585	318	35.0951	8.30908
A0A0G2JYC6	RCG62582, isoform CRA_c OS=Rattus norvegicus OX=10116 GN=Ubap2l PE=1 SV=1 - [A0A0G2JYC6_RAT]	141.045	7.49	3	5	5	5	1.00427	5	9.7851	0.918285	5	7.81469	1.047	5	3.37294	0.937359	5	8.63821	1.01579	5	13.7545	0.977001	5	1.93988	1.05152	5	5.19253	1.03758	5	3.15651	0.977091	5	8.79284	1068	112.44	6.59521
A0A0G2JVD6	[Histone H3]-lysine(4) N-trimethyltransferase OS=Rattus norvegicus OX=10116 GN=Kmt2d PE=1 SV=1 - [A0A0G2JVD6_RAT]	140.583	0.63	6	3	4	7	1.00142	4	3.19389	1.01904	4	0.87716	1.00501	4	1.42906	0.96536	4	1.49289	1.0421	4	4.95792	1.01664	4	9.05088	1.03559	4	3.38206	0.997767	4	4.46589	0.925981	4	5.44775	5840	628.435	5.87158
B2RZ79	Iron-sulfur cluster assembly enzyme OS=Rattus norvegicus OX=10116 GN=Iscu PE=1 SV=1 - [B2RZ79_RAT]	140.483	23.95	1	3	4	5	0.962785	4	6.02545	0.93805	4	7.84309	0.99596	4	1.84115	1.02686	4	3.14416	1.06394	4	4.63089	0.987636	4	0.859287	1.07661	4	4.97712	1.0538	4	5.70653	0.914702	4	3.56915	167	17.9556	9.29053
P13697	NADP-dependent malic enzyme OS=Rattus norvegicus OX=10116 GN=Me1 PE=1 SV=2 - [MAOX_RAT]	139.956	11.19	4	8	8	11	1.00293	11	8.74124	1.02865	11	9.98954	0.982649	11	6.28859	0.99543	11	4.35537	0.984589	11	7.20867	0.991887	11	3.63439	0.993539	11	8.428	0.98456	11	9.45319	1.03468	11	11.858	572	63.962	6.93213
R9PXU3	Protein kinase C and casein kinase substrate in neurons 2 protein OS=Rattus norvegicus OX=10116 GN=Pacsin2 PE=1 SV=2 - [R9PXU3_RAT]	139.914	8.26	3	4	4	6	1.04021	6	7.21815	0.994558	6	5.6536	0.973564	6	2.69601	0.986425	6	1.71643	1.00359	6	2.47591	1.01484	6	2.35114	0.992976	6	5.42856	1.00074	6	7.00375	1.03361	6	5.076	484	55.3079	5.19873
Q64232	Very-long-chain enoyl-CoA reductase OS=Rattus norvegicus OX=10116 GN=Tecr PE=1 SV=1 - [TECR_RAT]	139.647	11.04	1	4	4	9	1.13747	9	7.17451	1.08644	9	12.4371	0.948539	9	1.6986	0.939061	9	4.91963	0.962009	9	3.87517	0.934135	9	6.35412	0.931894	9	10.0111	0.977898	9	11.5618	1.15287	9	8.22205	308	36.0988	9.5542
Q4QQS7	OMPdecase OS=Rattus norvegicus OX=10116 GN=Umps PE=1 SV=1 - [Q4QQS7_RAT]	139.644	7.9	1	5	5	5	1.0167	5	4.46373	1.05207	5	4.08557	1.00638	5	3.69498	1.01406	5	1.50285	0.989081	5	2.47904	0.978397	5	8.96916	0.995661	5	9.54912	0.978065	5	6.53603	0.989827	5	10.682	481	52.3454	6.48096
G3V7T6	Splicing factor 3b, subunit 1 OS=Rattus norvegicus OX=10116 GN=Sf3b1 PE=1 SV=1 - [G3V7T6_RAT]	139.302	8.44	4	9	11	16	1.05303	12	4.4162	1.08694	12	5.63922	0.990121	12	6.43023	0.983577	12	1.91387	0.96993	12	6.74572	1.01044	12	5.60225	0.965789	12	9.90019	0.990339	12	5.6951	1.04945	12	11.1309	1304	145.738	7.09326
D3ZCG9	Integrin alpha 3 variant A OS=Rattus norvegicus OX=10116 GN=Itga3 PE=2 SV=1 - [D3ZCG9_RAT]	139.239	7.13	3	8	8	9	1.05642	9	4.19468	0.989899	9	5.09487	0.983996	9	3.77413	1.01508	9	6.28654	0.990831	9	9.15849	0.993882	9	8.46198	0.972385	9	7.63304	1.01782	9	11.4779	1.01034	9	6.64718	1052	116.94	6.87354
O08837	Cell division cycle 5-like protein OS=Rattus norvegicus OX=10116 GN=Cdc5l PE=1 SV=2 - [CDC5L_RAT]	139.211	8.48	50	4	6	6	1.06553	4	0.898695	1.07342	4	1.44497	0.952273	4	1.92457	1.00336	4	0.343381	0.964345	4	3.81525	1.01811	4	2.29041	0.945242	4	2.48819	0.962301	4	3.07697	1.10925	4	1.25169	802	92.1606	8.01611
B2RZB7	Small nuclear ribonucleoprotein Sm D1 OS=Rattus norvegicus OX=10116 GN=Snrpd1 PE=1 SV=1 - [B2RZB7_RAT]	139.107	20.17	1	3	3	4	0.943331	4	1.37917	0.865651	4	4.63676	1.00078	4	6.39943	0.955524	4	1.63892	1.1033	4	6.91056	0.953476	4	4.98524	1.10283	4	6.39929	1.13807	4	2.18593	0.951307	4	15.8373	119	13.2734	11.561
B2RYN0	Phosphoacetylglucosamine mutase OS=Rattus norvegicus OX=10116 GN=Pgm3 PE=1 SV=1 - [B2RYN0_RAT]	139.02	13.1	2	8	8	8	1.04318	8	6.56446	1.01937	8	12.8507	0.996795	8	6.22744	1.01138	8	3.29833	1.00034	8	5.41541	1.02535	8	3.91185	0.94763	8	8.68008	0.957449	8	2.41671	1.01114	8	6.76167	542	59.6473	6.23975
Q99068	Alpha-2-macroglobulin receptor-associated protein OS=Rattus norvegicus OX=10116 GN=Lrpap1 PE=1 SV=2 - [AMRP_RAT]	138.997	25.56	1	7	7	7	0.99833	7	9.92866	1.01049	7	12.5877	0.968466	7	3.11037	0.977703	7	5.41776	1.0151	7	6.29662	0.986284	7	3.68283	1.0089	7	4.25201	1.01966	7	6.05012	1.03982	7	7.80545	360	42.0061	7.37158
B1WC61	Complex I assembly factor ACAD9, mitochondrial OS=Rattus norvegicus OX=10116 GN=Acad9 PE=1 SV=1 - [ACAD9_RAT]	138.96	8.16	2	5	5	5	0.961406	5	4.01838	0.967139	5	3.57777	1.0113	5	2.6374	0.989124	5	3.62159	1.044	5	6.09461	0.994188	5	3.88525	1.07741	5	3.02108	1.03294	5	2.86884	0.935132	5	7.56712	625	68.7997	7.69385
M0RD20	Calcium-activated neutral proteinase small subunit OS=Rattus norvegicus OX=10116 GN=Capns1 PE=1 SV=1 - [M0RD20_RAT]	138.86	20.16	3	7	7	10	1.04911	10	6.79991	1.01979	10	7.66018	0.99474	10	2.94203	1.0047	10	2.07072	0.989877	10	7.0365	1.01964	10	3.49812	1.0071	10	9.29078	0.987325	10	8.00742	0.996706	10	7.41491	243	25.4304	5.42725
M0R3M8	Ribosomal RNA-processing 12 homolog OS=Rattus norvegicus OX=10116 GN=Rrp12 PE=1 SV=1 - [M0R3M8_RAT]	138.825	3.4	1	3	3	3	0.980121	3	1.93162	0.916643	3	0.489435	1.0027	3	1.67698	1.08306	3	4.17187	0.961991	3	2.29499	1.10546	3	5.21139	0.974459	3	5.79265	0.959352	3	7.68889	0.977802	3	3.18606	1293	143.041	8.73389
D3ZPN7	60S ribosomal protein L21 OS=Rattus norvegicus OX=10116 PE=3 SV=1 - [D3ZPN7_RAT]	138.76	44.38	42	10	10	15	0.96692	15	8.114	0.992641	15	9.30152	0.992752	15	7.61514	0.999511	15	4.83271	1.02001	15	8.92975	1.01138	15	12.0494	0.998922	15	10.6341	0.9961	15	11.318	1.00765	15	6.3888	160	18.6662	10.5503
Q9JJ50	Hepatocyte growth factor-regulated tyrosine kinase substrate OS=Rattus norvegicus OX=10116 GN=Hgs PE=1 SV=1 - [HGS_RAT]	138.526	6.06	5	4	6	9	0.989968	7	1.8739	1.0021	7	11.147	0.989888	7	1.78419	0.998438	7	2.48257	1.01812	7	12.0963	1.00023	7	8.98777	1.04959	7	6.80988	1.01094	7	5.69177	0.977803	7	8.87039	776	86.1916	6.25244
P85515	Alpha-centractin OS=Rattus norvegicus OX=10116 GN=Actr1a PE=1 SV=1 - [ACTZ_RAT]	138.372	17.02	2	6	7	12	1.05372	8	9.0359	1.08691	8	7.56204	0.985496	8	2.85354	1.0019	8	3.68109	0.958463	8	9.71285	1.0067	8	5.99882	0.951549	8	14.7637	0.976228	8	4.96098	1.06505	8	13.4294	376	42.5869	6.63916
G3V6F4	O-GlcNAc transferase subunit p110 OS=Rattus norvegicus OX=10116 GN=Ogt PE=1 SV=2 - [G3V6F4_RAT]	138.332	4.25	4	4	4	4	1.0523	4	5.37505	1.01297	4	7.0939	0.985806	4	3.91343	0.980168	4	1.95941	0.954574	4	10.5974	0.985905	4	4.23304	0.990088	4	11.2742	1.07667	4	12.8957	1.05639	4	14.252	1036	115.661	6.65381
F1LX07	Solute carrier family 25 member 12 OS=Rattus norvegicus OX=10116 GN=Slc25a12 PE=1 SV=3 - [F1LX07_RAT]	138.238	7.94	4	2	5	7	1.14842	2	9.61224	1.09232	2	1.11562	0.928182	2	6.45854	0.996735	2	0.652258	0.921556	2	7.50285	1.02162	2	1.3296	0.900732	2	5.51275	0.934833	2	8.76463	1.16701	2	5.28806	655	71.8713	8.11865
P62959	Histidine triad nucleotide-binding protein 1 OS=Rattus norvegicus OX=10116 GN=Hint1 PE=1 SV=5 - [HINT1_RAT]	138.182	20.63	3	3	3	4	1.03105	4	4.72168	0.994576	4	4.47788	1.02287	4	2.45997	1.07131	4	0.780814	0.970177	4	3.75763	1.00387	4	1.41761	0.941275	4	4.17111	0.969607	4	4.66946	0.977424	4	10.2652	126	13.7681	6.87354
M0RDJ4	Glia maturation factor OS=Rattus norvegicus OX=10116 GN=Gmfb PE=1 SV=2 - [M0RDJ4_RAT]	137.966	21.43	2	3	3	5	1.01874	5	1.07626	1.05017	5	10.0406	1.00623	5	4.01366	0.984601	5	5.72324	0.965921	5	2.97325	0.983408	5	6.06963	0.980065	5	7.67442	1.01298	5	6.13306	1.0438	5	6.09118	140	16.4424	5.43994
M0R7Q3	Recombination signal-binding protein for immunoglobulin kappa J region OS=Rattus norvegicus OX=10116 GN=Rbpj PE=3 SV=2 - [M0R7Q3_RAT]	137.955	9.46	2	4	4	5	0.817005	5	8.12073	0.786336	5	1.59837	1.10906	5	0.591525	1.10586	5	2.53998	1.04053	5	1.75747	1.13275	5	1.28585	1.04059	5	1.18797	1.03954	5	3.74502	0.780276	5	6.0768	465	51.9217	7.32764
Q6AY86	Vacuolar protein sorting-associated protein 26A OS=Rattus norvegicus OX=10116 GN=Vps26a PE=1 SV=1 - [VP26A_RAT]	137.896	13.15	2	2	4	4	0.960067	2	14.2474	0.950715	2	14.0305	1.01175	2	3.12034	1.00301	2	0.123135	1.01077	2	11.897	1.02639	2	3.4908	1.06258	2	11.2012	1.01826	2	11.1891	0.928992	2	16.2967	327	38.0907	6.56592
D4A7U1	Zyxin OS=Rattus norvegicus OX=10116 GN=Zyx PE=1 SV=1 - [D4A7U1_RAT]	137.682	10.99	9	6	6	7	1.04817	7	6.82168	1.02961	7	9.93399	0.972049	7	6.31052	0.970201	7	2.01752	1.05804	7	8.84122	0.964532	7	8.63878	1.00898	7	4.83995	1.02554	7	7.67391	1.00372	7	7.66979	564	60.2648	6.46826
F1M2K3	Small ubiquitin-related modifier OS=Rattus norvegicus OX=10116 GN=Sumo2 PE=3 SV=2 - [F1M2K3_RAT]	137.645	29.79	5	3	3	5	1.0095	5	3.74487	1.08713	5	12.2451	0.977297	5	6.97035	0.982797	5	1.02144	0.962003	5	4.43842	0.985343	5	7.13755	0.904047	5	21.6337	0.93962	5	10.551	1.02787	5	12.6342	94	10.7633	5.50342
Q505J9	ATPase family AAA domain-containing protein 1 OS=Rattus norvegicus OX=10116 GN=Atad1 PE=1 SV=1 - [ATAD1_RAT]	137.611	19.11	2	6	6	7	0.958034	7	7.61	0.983111	7	9.04876	1.03028	7	4.9619	1.083	7	0.630846	0.991017	7	6.1228	1.03011	7	3.18376	1.00247	7	2.6135	1.00407	7	15.1985	0.973487	7	13.3872	361	40.691	6.90283
F7EZ89	TBC1 domain family, member 15 OS=Rattus norvegicus OX=10116 GN=Tbc1d15 PE=1 SV=2 - [F7EZ89_RAT]	137.605	7.85	3	5	5	7	0.999821	7	3.44804	1.01164	7	4.4774	0.96935	7	1.64201	0.993837	7	2.43198	0.964879	7	2.36532	1.05114	7	1.52766	1.00812	7	5.41178	1.01083	7	5.10245	1.01673	7	2.94221	688	78.6482	5.5415
Q99MZ8	LIM and SH3 domain protein 1 OS=Rattus norvegicus OX=10116 GN=Lasp1 PE=1 SV=1 - [LASP1_RAT]	137.559	23.19	1	6	6	7	1.03624	7	6.08947	1.07419	7	6.72489	0.997577	7	3.37366	0.960161	7	3.42153	1.0253	7	14.0309	0.945178	7	6.44692	0.995614	7	7.20889	1.03504	7	1.49418	0.997349	7	13.5995	263	29.9514	7.04932
G3V8M5	Serine/threonine-protein phosphatase OS=Rattus norvegicus OX=10116 GN=Ppp4c PE=1 SV=1 - [G3V8M5_RAT]	136.952	8.14	2	1	2	3	1.043	2	1.045	1.00853	2	1.37584	0.996092	2	0.00846316	1.00404	2	2.53363	0.938015	2	2.66867	1.02804	2	1.19684	0.990799	2	1.95723	1.00258	2	0.0509624	1.0265	2	7.29266	307	35.0574	5.05908
F1LYI5	60S ribosomal protein L29 OS=Rattus norvegicus OX=10116 PE=3 SV=3 - [F1LYI5_RAT]	136.932	39.46	23	7	9	22	1.01021	19	7.04007	1.03843	19	6.08938	1.03858	19	5.58312	1.05202	19	5.46733	0.968029	19	9.36741	1.0437	19	6.17053	0.948727	19	9.33159	0.978217	19	7.08377	1.03628	19	8.2301	147	16.4002	11.4292
Q0D2L2	Mitochondrial ribosomal protein S22 OS=Rattus norvegicus OX=10116 GN=Mrps22 PE=1 SV=1 - [Q0D2L2_RAT]	136.755	16.99	1	6	6	9	0.972535	9	5.92373	0.986841	9	7.26383	1.00541	9	3.76803	1.03933	9	3.9721	1.00347	9	4.41312	1.02199	9	3.10794	1.00818	9	4.55167	0.99896	9	4.43985	0.960546	9	1.93505	359	41.2094	8.30908
P23928	Alpha-crystallin B chain OS=Rattus norvegicus OX=10116 GN=Cryab PE=1 SV=1 - [CRYAB_RAT]	136.386	18.86	1	3	3	5	1.18539	5	11.2491	1.28727	5	4.74736	0.885293	5	10.8638	0.893407	5	7.13499	1.00037	5	0.311555	0.961248	5	12.357	0.92397	5	5.70748	0.906583	5	2.01332	1.23256	5	12.0122	175	20.0763	7.32764
D3ZUX5	Coiled-coil-helix-coiled-coil-helix domain containing 3 (Predicted), isoform CRA_a OS=Rattus norvegicus OX=10116 GN=Chchd3 PE=1 SV=1 - [D3ZUX5_RAT]	136.138	24.23	8	5	6	7	0.97614	6	9.50331	0.91113	6	9.0286	0.972177	6	4.07937	0.990504	6	7.26555	1.03838	6	3.28935	0.996687	6	0.799755	1.0317	6	5.27141	1.05369	6	2.48496	1.01481	6	6.36616	227	26.4182	8.1333
Q9Z2G8	Nucleosome assembly protein 1-like 1 OS=Rattus norvegicus OX=10116 GN=Nap1l1 PE=1 SV=1 - [NP1L1_RAT]	135.517	8.72	7	3	4	10	1.05591	6	7.73597	1.10257	6	3.76103	0.99412	6	1.87269	1.14488	6	0.973298	0.821545	6	10.9806	1.1525	6	8.45539	0.803518	6	16.3313	0.873138	6	12.665	1.09144	6	3.34526	390	45.2849	4.50049
Q5M819	Phosphoserine phosphatase OS=Rattus norvegicus OX=10116 GN=Psph PE=2 SV=1 - [SERB_RAT]	135.471	24	3	5	6	7	0.704268	6	13.0128	0.738062	6	12.7759	1.1605	6	7.91607	1.14641	6	2.66889	1.0551	6	3.04305	1.17889	6	2.18585	1.05152	6	8.49086	1.03415	6	2.55497	0.682693	6	20.6099	225	24.9518	5.66846
B0BN85	Protein SGT1 homolog OS=Rattus norvegicus OX=10116 GN=Sugt1 PE=2 SV=1 - [SGT1_RAT]	135.301	7.14	1	2	2	3	1.18161	3	2.45172	1.16587	3	2.56537	0.961442	3	7.77496	1.01101	3	1.71198	0.829998	3	0.457262	1.03951	3	1.09653	0.835106	3	10.4043	0.865841	3	5.15985	1.21439	3	19.6	336	38.0669	5.2876
Q6AY20	Cation-dependent mannose-6-phosphate receptor OS=Rattus norvegicus OX=10116 GN=M6pr PE=1 SV=1 - [MPRD_RAT]	135.226	12.59	1	2	3	6	1.0932	3	1.792	1.08841	3	0.806429	0.921253	3	6.27991	0.990469	3	1.07832	0.963855	3	8.08477	1.0485	3	9.89542	0.967608	3	0.517874	0.943314	3	5.47297	1.12943	3	1.85605	278	31.0754	5.38916
A1L1M0	cAMP-dependent protein kinase catalytic subunit alpha OS=Rattus norvegicus OX=10116 GN=Prkaca PE=1 SV=1 - [A1L1M0_RAT]	135.2	9.12	2	2	4	7	1.02306	3	9.22465	0.998605	3	0.719299	1.00277	3	4.58661	0.995561	3	1.63707	0.999433	3	1.17272	1.06228	3	0.473846	1.03273	3	0.419026	0.988937	3	1.55021	0.949974	3	6.32088	351	40.58	8.79248
A0A0G2JVW5	HECT-type E3 ubiquitin transferase OS=Rattus norvegicus OX=10116 GN=Huwe1 PE=1 SV=1 - [A0A0G2JVW5_RAT]	135.108	1.3	1	4	5	5	0.919894	4	22.7356	0.967626	4	9.79755	1.08037	4	9.81987	0.970076	4	14.2935	1.01019	4	3.95846	1.05179	4	2.55199	1.06213	4	7.61606	0.974282	4	16.1648	0.936629	4	17.46	4062	447.378	5.40186
Q5EGY4	Synaptobrevin homolog YKT6 OS=Rattus norvegicus OX=10116 GN=Ykt6 PE=1 SV=1 - [YKT6_RAT]	134.91	24.24	1	5	5	5	1.02587	5	2.66595	0.998739	5	7.19799	1.01278	5	1.9519	1.02008	5	3.88106	1.01525	5	7.12476	0.982384	5	5.85872	1.05108	5	6.19888	1.0071	5	3.2026	0.998344	5	3.90108	198	22.3553	6.91748
M0RCH6	Uncharacterized protein OS=Rattus norvegicus OX=10116 GN=Chmp4b PE=1 SV=2 - [M0RCH6_RAT]	134.788	22.97	2	4	4	6	0.959082	6	4.83265	1.0379	6	7.72811	0.990428	6	2.74942	1.00725	6	3.20313	0.973684	6	2.10198	0.994194	6	6.81077	1.03414	6	8.72746	1.01624	6	9.11393	1.04147	6	7.3632	222	24.7966	4.99561
D3ZW57	60S ribosomal protein L38 OS=Rattus norvegicus OX=10116 PE=3 SV=2 - [D3ZW57_RAT]	134.393	33.33	21	2	3	8	0.964428	6	3.67476	0.934852	6	2.91999	1.00933	6	6.16557	0.985458	6	3.43933	1.07916	6	3.06248	0.971629	6	3.26625	1.07808	6	5.70963	1.08934	6	4.07676	0.896424	6	11.8069	69	7.95546	10.0083
Q9Z269	Vesicle-associated membrane protein-associated protein B OS=Rattus norvegicus OX=10116 GN=Vapb PE=1 SV=3 - [VAPB_RAT]	134.115	25.1	5	3	5	8	0.970885	5	2.6814	0.980901	5	2.10294	0.966289	5	3.07852	0.996372	5	3.90282	0.998987	5	0.895291	1.04541	5	1.75559	0.992981	5	7.36156	1.03984	5	4.06128	0.988338	5	10.681	243	26.899	7.78174
D3ZXH7	Aly/REF export factor OS=Rattus norvegicus OX=10116 GN=Alyref PE=1 SV=1 - [D3ZXH7_RAT]	134.034	20.11	2	4	4	5	1.10257	5	4.8732	1.07804	5	8.80212	0.940582	5	10.4442	0.998739	5	2.05185	0.968093	5	9.81	0.921091	5	8.03379	0.922832	5	16.0423	0.991953	5	11.5566	1.06573	5	25.3518	189	19.9032	9.86182
B3DMA1	Ataxin 2-like OS=Rattus norvegicus OX=10116 GN=Atxn2l PE=1 SV=1 - [B3DMA1_RAT]	133.966	7.74	3	7	8	10	1.00944	9	5.77468	1.01094	9	6.53024	1.01114	9	7.19636	0.979813	9	2.52415	1.02133	9	9.11216	1.00327	9	4.19047	1.0678	9	3.47057	1.01052	9	3.57615	0.973714	9	7.99207	1072	112.784	8.5874
Q9ESH1	26S proteasome non-ATPase regulatory subunit 4 OS=Rattus norvegicus OX=10116 GN=Psmd4 PE=1 SV=1 - [Q9ESH1_RAT]	133.916	17.51	23	6	7	9	1.01145	8	4.50228	1.02672	8	5.88546	1.01766	8	3.82014	1.01419	8	6.04151	0.988449	8	4.48399	1.03013	8	4.1872	0.962592	8	5.71728	0.986795	8	2.50831	0.956206	8	11.9482	377	40.7052	4.79248
A0A0G2JYC7	Hepatoma-derived growth factor-related protein 2 OS=Rattus norvegicus OX=10116 GN=Hdgfl2 PE=1 SV=1 - [A0A0G2JYC7_RAT]	133.593	13.67	2	8	9	11	1.17429	10	9.22344	1.17319	10	13.6057	0.960559	10	2.24497	0.931555	10	6.12303	0.939057	10	6.02569	0.941293	10	10.2127	0.913508	10	9.6134	0.91486	10	4.63284	1.19344	10	9.4069	651	71.8505	8.98291
D3ZZR9	Peptidylprolyl isomerase OS=Rattus norvegicus OX=10116 GN=Fkbp2 PE=1 SV=1 - [D3ZZR9_RAT]	133.499	33.57	3	7	7	13	1.11556	13	3.39218	1.12081	13	12.1494	1.00433	13	5.06786	1.01727	13	2.9657	0.929796	13	8.77229	1.00658	13	5.6613	0.906077	13	4.15737	0.927075	13	6.61131	1.12962	13	12.1583	140	15.3782	8.88037
P62815	V-type proton ATPase subunit B, brain isoform OS=Rattus norvegicus OX=10116 GN=Atp6v1b2 PE=1 SV=1 - [VATB2_RAT]	133.381	8.22	4	4	5	6	0.952737	5	3.36466	0.951407	5	10.994	1.03731	5	3.48047	1.0028	5	2.23551	1.05442	5	1.66334	0.995779	5	0.676643	1.06317	5	3.77935	1.05261	5	2.2998	0.937621	5	11.8009	511	56.5149	5.80811
A0A0G2KAW7	Eukaryotic translation initiation factor 4H OS=Rattus norvegicus OX=10116 GN=Eif4h PE=1 SV=1 - [A0A0G2KAW7_RAT]	133.266	33.33	7	11	11	13	1.02033	13	3.29695	1.00162	13	6.25909	1.01886	13	7.63381	0.997201	13	2.81883	1.01941	13	4.29967	0.997121	13	3.73033	0.992862	13	6.49906	0.989331	13	5.5804	1.03537	13	6.44664	231	25.4807	8.6167
Q6AXR4	Beta-hexosaminidase subunit beta OS=Rattus norvegicus OX=10116 GN=Hexb PE=2 SV=1 - [HEXB_RAT]	133.106	8.57	2	4	4	5	1.05457	5	6.06901	1.03433	5	6.61925	0.973893	5	4.17837	0.983867	5	3.55902	0.977587	5	0.265461	1.0439	5	5.40916	0.958033	5	6.20762	0.980851	5	6.7821	1.12139	5	6.50003	537	61.4884	7.94287
G3V8P5	Similar to cDNA sequence BC017158 OS=Rattus norvegicus OX=10116 GN=RGD1310127 PE=1 SV=1 - [G3V8P5_RAT]	132.652	3	2	1	1	2	0.921335	2	7.46321	0.919914	2	0.00838909	1.05881	2	4.18428	1.00078	2	0.382999	1.04254	2	2.43729	0.955156	2	5.40102	1.11566	2	4.49038	1.08727	2	1.00586	0.873845	2	0.834106	466	50.8062	7.28369
A0A0G2K7K2	Apoptosis-inducing factor 1, mitochondrial OS=Rattus norvegicus OX=10116 GN=Aifm1 PE=1 SV=1 - [A0A0G2K7K2_RAT]	131.281	11.02	3	6	6	7	0.914554	7	12.763	0.878252	7	5.79467	1.04519	7	1.05036	1.02354	7	4.18164	1.071	7	5.35732	0.982039	7	9.16253	1.07182	7	15.1544	1.03143	7	10.5825	0.915051	7	18.3189	608	66.0925	8.89502
A0A0G2K756	Acyl-Coenzyme A binding domain containing 3 OS=Rattus norvegicus OX=10116 GN=Acbd3 PE=1 SV=1 - [A0A0G2K756_RAT]	131.229	11.79	74	2	7	8	1.00089	3	3.20106	0.948184	3	6.70322	1.01618	3	6.79978	0.933738	3	4.16978	1.08487	3	16.1889	0.973016	3	2.12074	1.09882	3	0.186695	1.04471	3	1.5305	0.977607	3	4.29408	526	60.2829	5.0083
D4A1R8	Copine-1 OS=Rattus norvegicus OX=10116 GN=Cpne1 PE=1 SV=1 - [CPNE1_RAT]	131.084	9.89	5	7	7	9	1.07136	9	8.14198	1.10198	9	7.29473	0.937902	9	2.54732	0.975211	9	1.2069	0.96676	9	5.26394	0.982252	9	4.24533	0.956725	9	4.72187	0.961256	9	2.89536	1.13172	9	7.68332	536	58.8064	5.64307
Q71SY3	Component 3 of promoter of RISC OS=Rattus norvegicus OX=10116 GN=Tsn PE=1 SV=1 - [Q71SY3_RAT]	130.578	12.72	15	2	3	6	0.922612	3	1.71353	0.981781	3	6.68767	1.0351	3	2.6176	1.05087	3	0.0676121	1.01423	3	3.00635	1.05239	3	0.503681	0.997655	3	1.05766	0.974397	3	0.295567	0.979219	3	1.51845	228	26.1547	6.44287
P45953	Very long-chain specific acyl-CoA dehydrogenase, mitochondrial OS=Rattus norvegicus OX=10116 GN=Acadvl PE=1 SV=1 - [ACADV_RAT]	130.474	5.34	2	3	3	3	0.915578	3	0.612368	0.953116	3	4.96654	1.04375	3	4.33513	1.03497	3	0.528973	1.00701	3	1.86557	1.02265	3	3.13627	1.0143	3	0.707648	1.01265	3	0.566431	0.989126	3	1.08404	655	70.7046	8.89502
D3ZAS8	Spliceosome-associated factor 3, U4/U6 recycling protein OS=Rattus norvegicus OX=10116 GN=Sart3 PE=1 SV=1 - [D3ZAS8_RAT]	130.405	5.52	14	3	7	12	1.03939	7	6.77833	0.998418	7	6.11725	0.97889	7	5.70393	1.0176	7	5.93203	0.988982	7	9.29774	0.979651	7	9.22622	0.973402	7	5.19062	0.961404	7	3.35726	1.04759	7	6.94341	960	109.355	5.42725
F1M978	Inositol-1-monophosphatase OS=Rattus norvegicus OX=10116 GN=Impa1 PE=1 SV=1 - [F1M978_RAT]	130.401	14.08	3	4	4	4	1.03008	4	1.85766	1.00098	4	4.14547	0.977144	4	3.95679	1.00758	4	1.68061	1.05126	4	3.07119	0.980414	4	1.71474	1.0106	4	5.8656	0.993996	4	5.25863	0.983474	4	5.43849	277	30.4754	5.2876
G3V9E4	Acyl-peptide hydrolase OS=Rattus norvegicus OX=10116 GN=Apeh PE=1 SV=1 - [G3V9E4_RAT]	130.234	9.29	2	7	7	8	1.0217	8	6.98526	1.03216	8	11.4869	0.998512	8	4.58516	1.00891	8	4.57682	0.983083	8	3.90975	1.0086	8	3.34867	0.992704	8	7.43588	1.01435	8	8.23035	1.01835	8	9.68167	732	81.3154	5.73193
G3V8C8	Tubulin tyrosine ligase OS=Rattus norvegicus OX=10116 GN=Ttl PE=4 SV=1 - [G3V8C8_RAT]	130.22	3.18	1	1	1	2	0.962946	2	2.22877	0.960638	2	3.24934	1.00701	2	3.92773	0.956085	2	1.87536	1.09672	2	0.619138	0.969883	2	9.93544	1.11315	2	2.81073	1.06975	2	6.20221	0.872257	2	4.32458	377	43.1759	6.39209
F1M6W2	Endoplasmic reticulum metallopeptidase 1 OS=Rattus norvegicus OX=10116 GN=Ermp1 PE=1 SV=1 - [F1M6W2_RAT]	130.203	2.56	2	2	2	2	1.01736	2	2.70966	0.978781	2	1.8302	0.965467	2	0.332216	1.03869	2	3.64146	0.951923	2	4.08523	1.03607	2	1.43852	0.946573	2	2.51213	1.00244	2	0.381862	1.09974	2	6.65702	898	99.9163	7.48877
G3V624	Coronin OS=Rattus norvegicus OX=10116 GN=Coro1c PE=1 SV=1 - [G3V624_RAT]	130.117	14.14	3	7	8	10	0.993271	9	6.52756	0.962043	9	7.69671	0.979976	9	3.49524	0.991915	9	2.94362	1.04365	9	4.76743	0.973301	9	2.63585	1.04737	9	4.26606	1.04355	9	5.81964	0.937524	9	8.52633	474	53.144	7.07861
Q4G017	Nischarin OS=Rattus norvegicus OX=10116 GN=Nisch PE=2 SV=2 - [NISCH_RAT]	130.06	2.2	8	1	3	4	1.09666	2	15.4101	1.08697	2	17.9724	1.06156	2	2.50103	0.972656	2	4.50501	0.896576	2	11.8145	0.986077	2	9.0372	0.876474	2	12.8902	0.943092	2	13.4285	1.12851	2	19.2847	1502	166.399	5.37646
P63074	Eukaryotic translation initiation factor 4E OS=Rattus norvegicus OX=10116 GN=Eif4e PE=1 SV=1 - [IF4E_RAT]	129.723	22.12	2	5	5	6	0.988098	6	4.45747	1.03768	6	6.37762	0.986026	6	3.67797	1.01088	6	6.4791	0.987588	6	5.72801	1.05859	6	2.47839	0.957943	6	0.486811	0.991391	6	5.40839	0.977146	6	11.05	217	25.0375	6.15088
Q8R5H8	Fas apoptotic inhibitory molecule 1 OS=Rattus norvegicus OX=10116 GN=Faim PE=2 SV=1 - [FAIM1_RAT]	129.597	10.45	1	2	2	4	1.00295	4	4.57693	1.01498	4	5.10175	1.01136	4	3.24421	1.01778	4	3.09176	0.937294	4	5.90969	1.03089	4	5.24106	1.02177	4	10.1842	1.01321	4	8.66676	1.00082	4	6.28303	201	22.6902	4.97021
A0A0G2K7C6	Protein-serine/threonine phosphatase OS=Rattus norvegicus OX=10116 GN=Ppm1b PE=1 SV=1 - [A0A0G2K7C6_RAT]	129.537	10.51	6	3	3	3	0.926604	3	3.52894	0.91497	3	4.5255	0.995083	3	2.29056	0.994498	3	7.06332	1.04268	3	11.9311	1.01492	3	2.95602	1.07338	3	2.9605	1.08396	3	7.13175	0.903029	3	11.682	447	49.2601	5.32568
F1LPQ9	A-kinase anchor protein 2 OS=Rattus norvegicus OX=10116 GN=Akap2 PE=1 SV=2 - [F1LPQ9_RAT]	128.88	5.17	2	3	4	5	1.11242	3	3.00631	1.21066	3	0.338772	0.973481	3	3.94283	0.900711	3	3.92622	1.02867	3	11.9435	0.910638	3	3.80719	0.943631	3	1.16751	0.987026	3	5.65091	1.05464	3	10.6349	870	95.8833	5.17334
Q99PV2	Syntaxin binding protein 3, isoform CRA_a OS=Rattus norvegicus OX=10116 GN=Stxbp3 PE=1 SV=1 - [Q99PV2_RAT]	128.82	4.22	1	2	2	3	1.00534	3	5.62734	0.996297	3	4.69028	0.984825	3	0.0935434	0.983434	3	0.0251395	1.0049	3	1.06105	0.979659	3	1.8716	1.07286	3	6.88146	1.07163	3	5.41173	0.912983	3	3.15511	593	67.9769	8.01611
Q52KJ9	Thioredoxin domain containing 1 OS=Rattus norvegicus OX=10116 GN=Tmx1 PE=1 SV=1 - [Q52KJ9_RAT]	128.38	13.31	3	4	5	6	0.893508	5	6.99113	0.886151	5	2.71895	1.07462	5	0.924408	1.05184	5	1.02211	1.03097	5	2.18305	1.01925	5	2.4277	1.05932	5	1.80517	1.03988	5	6.48434	0.902245	5	7.91549	278	31.4147	5.30029
A0A0G2JU89	E3 ubiquitin-protein ligase UBR4 OS=Rattus norvegicus OX=10116 GN=Ubr4 PE=1 SV=1 - [A0A0G2JU89_RAT]	128.16	1.94	3	7	9	9	0.902541	7	4.99112	0.97005	7	2.15425	0.993914	7	2.74789	1.01451	7	1.30332	0.985388	7	3.08268	1.07645	7	1.57474	1.03124	7	7.46758	1.04618	7	7.76391	0.97588	7	5.057	5193	573.511	6.02393
Q63663	Guanylate-binding protein 1 OS=Rattus norvegicus OX=10116 GN=Gbp2 PE=1 SV=2 - [GBP2_RAT]	127.62	5.94	20	2	5	6	1.12004	3	11.2282	1.15556	3	9.14308	0.977714	3	1.17834	1.02957	3	4.56507	0.904119	3	13.9364	1.04519	3	2.98076	0.839762	3	12.6567	0.837147	3	4.0555	1.14088	3	5.59199	589	67.0665	5.69385
Q5XIW8	U4/U6.U5 tri-snRNP-associated protein 1 OS=Rattus norvegicus OX=10116 GN=Sart1 PE=1 SV=1 - [SNUT1_RAT]	127.438	10.55	4	5	7	9	0.996319	5	4.06454	1.06396	5	8.10046	0.979346	5	5.99835	0.959919	5	1.56929	0.997133	5	6.21367	1.04831	5	2.9146	0.988712	5	5.36152	0.957874	5	3.55234	1.10171	5	10.0488	806	90.9555	5.77002
Q5I0F0	Developmentally-regulated GTP-binding protein 1 OS=Rattus norvegicus OX=10116 GN=Drg1 PE=1 SV=1 - [Q5I0F0_RAT]	126.97	8.17	1	2	2	4	1.01994	4	4.51658	0.997141	4	2.5779	0.971228	4	1.91559	0.968805	4	4.1265	1.00664	4	4.30766	0.981523	4	4.44746	1.05034	4	4.04317	1.06154	4	3.84005	0.996779	4	2.98463	367	40.4868	8.89502
F1LZW6	Solute carrier family 25 member 13 OS=Rattus norvegicus OX=10116 GN=Slc25a13 PE=1 SV=2 - [F1LZW6_RAT]	126.646	8.88	6	2	5	7	1.03016	2	10.9679	1.01683	2	12.7701	0.935561	2	3.82355	1.01256	2	1.47789	0.971651	2	13.8956	1.03098	2	0.92033	1.02729	2	7.15702	0.993293	2	6.61539	1.01474	2	15.0419	484	54.0651	7.25439
B2GUX3	DNA helicase OS=Rattus norvegicus OX=10116 GN=Mcm5 PE=2 SV=1 - [B2GUX3_RAT]	126.605	13.76	3	9	9	11	1.23507	11	8.41964	1.2559	11	13.1669	0.920395	11	8.17219	0.939778	11	4.47026	0.923787	11	5.4129	0.900654	11	5.45628	0.918054	11	8.98934	0.920767	11	11.5348	1.2364	11	16.1848	734	82.4131	8.29443
Q66HC5	Nuclear pore complex protein Nup93 OS=Rattus norvegicus OX=10116 GN=Nup93 PE=1 SV=1 - [NUP93_RAT]	126.227	11.48	1	9	9	10	1.01606	10	5.03467	0.980318	10	6.64561	1.01642	10	3.57946	1.00775	10	3.21581	0.987836	10	4.55736	1.01138	10	2.34466	0.997351	10	8.32936	1.00817	10	3.01705	0.949625	10	12.8594	819	93.2434	5.71924
Q6AYS3	Carboxypeptidase OS=Rattus norvegicus OX=10116 GN=Ctsa PE=1 SV=1 - [Q6AYS3_RAT]	126.187	8.99	1	3	3	6	0.984364	6	3.84955	0.982119	6	9.39713	0.991253	6	3.94319	0.975221	6	7.01493	1.04197	6	7.82547	0.997456	6	6.50552	0.998625	6	10.6196	1.03696	6	7.7747	1.00029	6	7.41995	456	51.183	5.23682
D4ABI6	Ubiquitin carboxyl-terminal hydrolase OS=Rattus norvegicus OX=10116 GN=Uchl3 PE=1 SV=2 - [D4ABI6_RAT]	126.118	8.7	2	1	2	4	0.875904	3	2.99562	0.939953	3	4.20236	1.0226	3	0.171427	1.05208	3	2.65934	1.03013	3	4.0853	1.05979	3	0.363699	1.03801	3	3.24891	1.03273	3	0.311009	0.872149	3	5.43959	230	26.093	5.10986
Q6AYA6	Cytochrome b-245 chaperone 1 OS=Rattus norvegicus OX=10116 GN=Cybc1 PE=1 SV=1 - [CYBC1_RAT]	126.079	16.04	1	3	3	4	0.878139	4	1.69726	0.855697	4	2.79628	1.05472	4	2.57712	1.04281	4	6.04847	1.02818	4	6.12252	1.02593	4	3.78189	1.0164	4	4.13448	1.08351	4	8.22412	0.909053	4	3.4327	187	20.8809	8.5874
Q32PX2	Aminoacyl tRNA synthase complex-interacting multifunctional protein 2 OS=Rattus norvegicus OX=10116 GN=Aimp2 PE=2 SV=1 - [AIMP2_RAT]	125.884	9.38	4	3	3	4	0.909652	4	6.65178	0.863463	4	4.17001	1.04984	4	1.85778	1.01586	4	1.66166	1.06289	4	1.8065	0.978926	4	5.9401	1.10627	4	2.91044	1.09968	4	4.59071	0.801402	4	3.91006	320	35.4203	8.30908
Q63377	Sodium/potassium-transporting ATPase subunit beta-3 OS=Rattus norvegicus OX=10116 GN=Atp1b3 PE=2 SV=1 - [AT1B3_RAT]	125.481	4.66	1	2	2	4	1.08714	4	19.6805	1.10379	4	19.3707	0.949763	4	3.48369	1.01309	4	1.04191	0.944998	4	18.7926	0.988668	4	5.0813	0.92782	4	18.947	0.940607	4	10.8192	1.09071	4	17.1341	279	31.8091	7.95752
P55213	Caspase-3 OS=Rattus norvegicus OX=10116 GN=Casp3 PE=2 SV=2 - [CASP3_RAT]	125.063	15.16	1	3	3	4	1.22888	4	3.09763	1.24635	4	1.98433	0.918556	4	7.54062	0.933819	4	0.628617	0.911886	4	2.97	0.937386	4	4.1207	0.896185	4	2.89182	0.91564	4	1.86241	1.21869	4	9.93102	277	31.4712	6.354
A0A0G2JWX4	Keratin, type II cytoskeletal 2 epidermal OS=Rattus norvegicus OX=10116 GN=Krt2 PE=1 SV=1 - [A0A0G2JWX4_RAT]	124.902	3.36	2	2	2	3	1.03586	3	6.23955	0.987063	3	2.94673	0.880666	3	3.98726	0.824908	3	8.97624	1.16063	3	6.52238	0.842755	3	8.58337	1.19376	3	6.83873	1.23328	3	10.0443	0.983607	3	0.572261	684	69.0632	7.69385
Q9QZA6	CD151 antigen OS=Rattus norvegicus OX=10116 GN=Cd151 PE=1 SV=2 - [CD151_RAT]	124.789	13.04	1	4	4	5	1.05076	5	9.60829	1.08811	5	4.10925	0.946848	5	0.454335	1.0277	5	3.62087	0.972563	5	1.46167	0.947401	5	7.51402	1.00878	5	5.02064	1.00077	5	7.67486	1.04775	5	6.73795	253	28.3364	7.84033
A0A0G2K3V7	DNA topoisomerase I OS=Rattus norvegicus OX=10116 GN=Top1 PE=1 SV=1 - [A0A0G2K3V7_RAT]	124.596	10.43	2	6	6	8	1.01792	8	17.5495	1.07088	8	8.4109	1.01298	8	5.44265	0.977286	8	4.19761	0.957108	8	6.24279	0.982474	8	7.56349	0.968416	8	8.91132	0.976633	8	3.73937	1.03326	8	15.6239	748	88.5229	9.37842
D3ZJ32	Extended synaptotagmin 2 OS=Rattus norvegicus OX=10116 GN=Esyt2 PE=1 SV=3 - [D3ZJ32_RAT]	124.46	6.98	5	4	6	8	1.00032	5	7.0501	1.01671	5	6.77701	0.973572	5	4.55023	0.977877	5	3.5755	1.01884	5	4.42473	1.03602	5	2.3749	0.993527	5	7.34845	1.03022	5	12.2022	1.01168	5	3.52607	845	93.8922	8.23584
A8QIC3	DnaJ (Hsp40) homolog, subfamily C, member 9 (Predicted) OS=Rattus norvegicus OX=10116 GN=Dnajc9 PE=1 SV=1 - [A8QIC3_RAT]	124.234	19.31	1	4	4	4	1.19729	4	7.74331	1.17135	4	6.07962	0.900652	4	3.35802	0.946301	4	3.71461	0.938706	4	5.26	0.937471	4	2.52505	0.92174	4	5.24767	0.925635	4	4.37875	1.19993	4	5.91891	259	29.9603	7.32764
A0A0H2UHV4	Eukaryotic translation initiation factor 5B OS=Rattus norvegicus OX=10116 GN=Eif5b PE=1 SV=1 - [A0A0H2UHV4_RAT]	124.04	7.39	31	7	9	11	0.922562	9	12.5484	0.907288	9	8.19808	1.03977	9	3.18486	1.02613	9	4.58774	1.04676	9	4.10145	1.0489	9	6.37318	1.04729	9	6.31528	1.05333	9	5.29674	0.924331	9	9.65639	1205	136.329	5.51611
F2Z3T9	U2 snRNP auxiliary factor large subunit OS=Rattus norvegicus OX=10116 GN=U2af2 PE=1 SV=2 - [F2Z3T9_RAT]	123.675	15.71	3	7	7	9	1.06429	9	8.48687	1.02763	9	9.57357	0.961756	9	6.17179	0.969199	9	3.9512	0.983954	9	7.08521	0.986364	9	4.87424	0.957868	9	6.37648	0.976808	9	8.52052	1.1181	9	3.91774	471	53.087	9.08545
A0A0G2JXH6	Keratin, type II cytoskeletal 73 OS=Rattus norvegicus OX=10116 GN=Krt73 PE=1 SV=1 - [A0A0G2JXH6_RAT]	123.328	6.31	13	1	4	6	0.97362	1		1.00817	1		0.73728	1		0.731677	1		1.33406	1		0.752501	1		1.35991	1		1.28414	1		1.04984	1		539	58.7446	7.94287
Q6QI86	Immediate early response 3-interacting protein 1 OS=Rattus norvegicus OX=10116 GN=Hdhd2 PE=1 SV=1 - [Q6QI86_RAT]	123.306	8.85	3	2	3	5	0.951381	4	6.77799	0.954008	4	5.32827	1.0549	4	2.60126	0.988114	4	1.75839	1.069	4	3.9824	0.932446	4	7.88657	1.11469	4	2.24187	1.02253	4	3.60175	0.924489	4	2.32658	384	42.4484	7.34229
B2RYJ2	Debranching RNA lariats 1 OS=Rattus norvegicus OX=10116 GN=Dbr1 PE=1 SV=1 - [B2RYJ2_RAT]	123.227	9.17	1	4	4	6	1.02616	6	2.96723	1.05886	6	4.40696	1.00655	6	6.9793	0.994434	6	3.11315	0.994565	6	5.17933	1.00094	6	2.61126	0.999832	6	2.68776	0.987189	6	3.69141	0.991121	6	6.70028	545	61.78	5.41455
P13599	IgG receptor FcRn large subunit p51 OS=Rattus norvegicus OX=10116 GN=Fcgrt PE=1 SV=1 - [FCGRN_RAT]	123.214	12.02	1	3	3	4	0.988713	3	3.05086	0.904666	3	14.4768	1.05018	3	7.54755	1.00919	3	3.51985	0.964265	3	4.41608	0.987886	3	1.60228	1.05698	3	10.8028	1.00098	3	2.20035	0.991204	3	1.58441	366	40.1431	5.04639
D3ZBT9	Protein phosphatase 6, regulatory subunit 3 OS=Rattus norvegicus OX=10116 GN=Ppp6r3 PE=1 SV=2 - [D3ZBT9_RAT]	123.138	7.9	3	5	5	5	1.02079	5	5.38144	1.11491	5	3.71953	0.962175	5	1.29534	0.95253	5	3.07251	0.974241	5	3.49339	0.969787	5	4.96441	0.961617	5	4.89051	0.949401	5	2.69242	1.13141	5	2.65775	873	97.4526	4.60205
Q5M943	THUMP domain containing 1 OS=Rattus norvegicus OX=10116 GN=Thumpd1 PE=2 SV=1 - [Q5M943_RAT]	122.925	10.48	3	3	3	4	0.964007	4	10.949	1.00908	4	5.06489	0.968934	4	2.47632	1.05295	4	1.16606	0.961939	4	9.76752	1.06375	4	0.584241	0.996776	4	7.43445	0.946251	4	7.34041	1.03643	4	10.2433	353	38.8918	8.14795
A0A0G2JSM1	Selenoprotein S OS=Rattus norvegicus OX=10116 GN=Selenos PE=1 SV=1 - [A0A0G2JSM1_RAT]	122.768	17.55	4	2	3	3	0.916069	2	0.946336	0.952554	2	5.60043	1.03558	2	4.96427	1.04058	2	2.44673	1.00023	2	0.738634	1.04526	2	4.77679	1.02573	2	2.78151	1.02934	2	1.53339	0.9153	2	4.41452	188	21.102	9.51025
F1LQ55	Non-specific lipid-transfer protein OS=Rattus norvegicus OX=10116 GN=Scp2 PE=1 SV=3 - [F1LQ55_RAT]	122.695	11.15	4	6	7	10	1.11483	9	5.43632	1.11578	9	10.1562	0.953292	9	5.17156	0.962539	9	2.53697	0.993981	9	5.73052	0.968905	9	1.72636	0.974029	9	7.29234	0.962859	9	4.68807	1.09171	9	11.8049	547	58.7494	7.03467
Q9ER30	Kelch-like protein 41 OS=Rattus norvegicus OX=10116 GN=Klhl41 PE=1 SV=1 - [KLH41_RAT]	122.51	9.74	6	7	7	7	1.1129	6	7.13233	1.08638	6	5.19046	0.939024	6	3.65432	0.983224	6	1.53496	0.926176	6	5.15059	0.99105	6	4.37706	0.964616	6	1.32231	0.974613	6	6.04436	1.10504	6	4.2364	606	68.1697	5.17334
Q6AZ33	Biliverdin reductase A OS=Rattus norvegicus OX=10116 GN=Blvra PE=1 SV=1 - [Q6AZ33_RAT]	122.385	8.14	2	2	2	3	0.893089	3	0.35681	0.938856	3	5.0597	0.987924	3	1.57572	1.03797	3	4.04771	1.02815	3	5.11375	1.06838	3	3.26066	1.00509	3	1.48354	1.0259	3	3.68291	0.92155	3	1.65235	295	33.4865	6.34131
P06536	Glucocorticoid receptor OS=Rattus norvegicus OX=10116 GN=Nr3c1 PE=1 SV=2 - [GCR_RAT]	122.302	5.41	2	1	2	3	1.08602	2	7.42513	1.11395	2	6.37233	0.947881	2	0.677724	0.874653	2	8.38371	1.03937	2	7.70274	0.859174	2	0.0115204	1.16108	2	5.93932	1.05204	2	0.608768	1.00851	2	3.56261	795	87.5005	6.771
Q5U2Y1	General transcription factor II-I OS=Rattus norvegicus OX=10116 GN=Gtf2i PE=1 SV=2 - [GTF2I_RAT]	121.84	7.56	3	6	6	6	1.07654	6	7.72647	1.08716	6	9.61662	0.986461	6	4.2919	0.97978	6	5.22253	0.970925	6	8.27488	0.969595	6	4.82933	0.97062	6	7.97639	0.969381	6	8.18898	1.05896	6	6.74409	979	110.146	6.7417
B2GV33	Amine oxidase (Fragment) OS=Rattus norvegicus OX=10116 GN=Maoa PE=2 SV=1 - [B2GV33_RAT]	121.839	12.88	3	8	8	9	0.97445	9	9.20652	0.97695	9	4.49726	0.991742	9	0.932486	1.01167	9	1.1943	1.02062	9	4.63447	1.03866	9	3.93828	1.00377	9	6.48559	1.00511	9	10.7081	0.960305	9	10.8865	520	58.7653	8.07471
Q4V7C6	GMP synthase [glutamine-hydrolyzing] OS=Rattus norvegicus OX=10116 GN=Gmps PE=1 SV=1 - [GUAA_RAT]	121.813	6.35	4	4	4	6	1.03164	6	2.31989	1.03623	6	6.0933	0.989114	6	2.18909	0.984803	6	2.79596	1.00852	6	3.64277	0.993668	6	3.89428	1.01192	6	3.32373	0.986937	6	2.82809	1.07643	6	2.90921	693	76.7088	6.63916
P11505	Plasma membrane calcium-transporting ATPase 1 OS=Rattus norvegicus OX=10116 GN=Atp2b1 PE=1 SV=3 - [AT2B1_RAT]	121.647	4.43	6	5	5	5	1.13002	5	2.24648	1.08523	5	5.76192	1.01079	5	2.64816	0.982838	5	1.66815	0.974651	5	1.98936	0.951814	5	6.39417	0.968946	5	2.58849	0.924927	5	5.58597	1.10878	5	3.804	1220	134.608	5.85889
P30904	Macrophage migration inhibitory factor OS=Rattus norvegicus OX=10116 GN=Mif PE=1 SV=4 - [MIF_RAT]	121.496	23.48	6	3	3	6	0.893994	6	7.40406	0.917153	6	13.2316	1.11117	6	1.87791	0.961344	6	4.25776	1.21126	6	6.28828	0.883265	6	8.74064	1.1959	6	12.3904	1.11328	6	5.57496	0.705389	6	15.0647	115	12.4692	7.34229
P07314	Glutathione hydrolase 1 proenzyme OS=Rattus norvegicus OX=10116 GN=Ggt1 PE=1 SV=4 - [GGT1_RAT]	120.516	5.63	9	2	3	3	0.608808	2	39.573	0.601511	2	33.674	1.18391	2	9.53578	1.18791	2	8.63507	1.08557	2	7.41457	1.17221	2	4.57601	1.1108	2	5.45447	1.07299	2	5.53251	0.612571	2	36.4084	568	61.5707	7.57666
F1M5V2	GLI pathogenesis-related 2 OS=Rattus norvegicus OX=10116 GN=Glipr2 PE=1 SV=3 - [F1M5V2_RAT]	120.303	20	1	2	2	3	1.02128	3	7.49222	1.05069	3	12.0907	0.942041	3	3.18653	0.972407	3	2.09013	0.972436	3	5.50978	1.04184	3	0.703026	0.937453	3	5.26138	0.986422	3	4.94363	1.13326	3	5.50557	170	18.9733	9.23193
G3V7J2	Interferon-inducible double-stranded RNA-dependent protein kinase activator A OS=Rattus norvegicus OX=10116 GN=Prkra PE=1 SV=1 - [G3V7J2_RAT]	120.294	12.14	13	3	4	4	1.09454	3	0.147327	1.07201	3	1.52688	0.986508	3	0.397122	1.01772	3	7.26637	0.953966	3	1.49597	1.00953	3	0.532082	0.935684	3	0.118337	0.954144	3	0.947496	1.03232	3	8.93156	313	34.3636	8.55811
B1WC70	Protein phosphatase 1, regulatory (Inhibitor) subunit 8 OS=Rattus norvegicus OX=10116 GN=Ppp1r8 PE=1 SV=1 - [B1WC70_RAT]	120.235	14.81	1	4	4	7	0.954671	7	7.14014	0.936625	7	2.04103	1.01781	7	5.49544	1.00802	7	6.12534	1.03761	7	1.32521	0.969146	7	10.1479	1.02166	7	4.59801	1.04549	7	3.57049	0.961219	7	5.47188	351	38.5159	7.37158
D4A8H8	Cytoplasmic FMR1-interacting protein OS=Rattus norvegicus OX=10116 GN=Cyfip1 PE=1 SV=1 - [D4A8H8_RAT]	120.184	5.43	6	6	7	8	1.01766	7	8.49265	0.993593	7	9.21458	1.00957	7	6.11019	0.987837	7	2.30226	1.00786	7	6.36015	1.02206	7	4.44093	1.03143	7	13.3252	1.02708	7	7.66437	0.944033	7	17.76	1253	145.164	6.90283
A0A0G2JWK2	Methyl-CpG-binding protein 2 OS=Rattus norvegicus OX=10116 GN=Mecp2 PE=1 SV=1 - [A0A0G2JWK2_RAT]	120.082	7.93	5	4	4	4	1.03006	4	8.33132	0.975676	4	1.79526	0.969206	4	7.70434	0.999997	4	1.48955	1.00653	4	1.57357	1.01179	4	2.08467	1.03283	4	4.76663	0.976762	4	4.875	1.01362	4	8.55832	492	53.0159	9.96436
A0A0G2K3N1	Golgi brefeldin A-resistant guanine nucleotide exchange factor 1 OS=Rattus norvegicus OX=10116 GN=Gbf1 PE=1 SV=1 - [A0A0G2K3N1_RAT]	119.942	5.03	4	6	7	9	1.1318	6	12.0473	1.04886	6	6.91909	0.953362	6	6.89766	0.971715	6	5.18923	1.00635	6	10.284	0.974974	6	5.10887	0.9684	6	9.26256	1.00049	6	6.98077	1.01734	6	8.56654	1850	205.204	5.78271
A0A0G2K0I3	Nicotinamide phosphoribosyltransferase OS=Rattus norvegicus OX=10116 GN=Nampt PE=1 SV=1 - [A0A0G2K0I3_RAT]	119.918	7.95	2	3	3	3	0.99832	3	5.37693	0.951515	3	9.69376	1.02969	3	4.03997	1.02172	3	1.42161	1.03054	3	2.82209	1.03181	3	3.10836	1.01299	3	1.08999	1.04638	3	1.31999	0.979027	3	2.71619	478	54.0579	8.00146
A0A0G2K613	Uncharacterized protein OS=Rattus norvegicus OX=10116 PE=3 SV=1 - [A0A0G2K613_RAT]	119.738	21.61	2	2	2	2	1.13401	2	17.6699	1.02647	2	5.37004	0.944032	2	6.76508	0.969394	2	0.924358	0.948695	2	0.313974	1.00115	2	5.61464	0.99977	2	6.41316	0.948111	2	7.89266	1.12175	2	1.80201	199	19.8163	4.69092
D3ZB30	Polypyrimidine tract-binding protein 1 OS=Rattus norvegicus OX=10116 GN=Ptbp1 PE=1 SV=1 - [D3ZB30_RAT]	119.519	6.6	8	2	5	9	1.07523	3	3.91274	1.01148	3	12.9737	0.90983	3	10.7074	0.983754	3	0.512065	1.08145	3	12.0822	1.01124	3	8.59878	1.03313	3	23.942	1.18781	3	5.40981	0.898595	3	27.4321	530	56.9004	9.17334
C0KUC5	LIM and senescent cell antigen-like-containing domain protein OS=Rattus norvegicus OX=10116 GN=Lims1 PE=1 SV=1 - [C0KUC5_RAT]	119.412	14.64	4	5	5	10	1.06946	10	7.92116	1.08992	10	10.0428	0.989121	10	3.62386	0.968294	10	2.69604	0.961113	10	8.40759	1.02654	10	4.58654	0.944421	10	3.65733	0.952409	10	6.95348	1.08038	10	10.2664	362	41.5811	8.04541
B2RZA9	Ube2l3 protein OS=Rattus norvegicus OX=10116 GN=Ube2l3 PE=2 SV=1 - [B2RZA9_RAT]	119.271	25.97	2	3	4	5	1.12546	4	6.33217	1.14615	4	11.8859	0.992291	4	1.96289	1.00067	4	3.7683	0.877756	4	3.15761	1.02978	4	1.83128	0.924039	4	20.8083	0.903182	4	15.3783	1.08938	4	12.2872	154	17.8502	8.51416
D3ZJH9	Malic enzyme OS=Rattus norvegicus OX=10116 GN=Me2 PE=1 SV=1 - [D3ZJH9_RAT]	118.953	7.53	4	4	4	4	0.987366	4	1.43582	0.983432	4	2.86997	1.00999	4	0.76943	1.02366	4	3.42092	1.00843	4	1.5871	1.02098	4	3.2422	1.0186	4	0.834048	0.995251	4	1.90444	0.940254	4	4.55431	584	65.3097	7.75244
A0A023IKI3	Proteasome subunit beta OS=Rattus norvegicus OX=10116 GN=Psmb8 PE=2 SV=1 - [A0A023IKI3_RAT]	118.94	4.35	3	1	1	3	0.970809	3	18.8654	0.87613	3	5.5901	1.07399	3	0.396762	1.00036	3	7.22632	1.05117	3	6.7513	0.954652	3	5.26116	1.05786	3	8.88632	1.08345	3	2.02194	0.887232	3	4.54745	276	30.558	7.78174
G3V8U4	Sorting nexin family member 27, isoform CRA_b OS=Rattus norvegicus OX=10116 GN=Snx27 PE=1 SV=3 - [G3V8U4_RAT]	118.923	10.27	3	4	4	4	0.980754	4	4.34768	0.994246	4	4.7797	0.997347	4	3.38626	0.949769	4	2.4008	1.07025	4	4.57062	0.983553	4	0.0732488	1.04785	4	3.71793	1.05977	4	0.176739	0.976627	4	4.00091	526	59.4925	6.17627
D3ZPD0	Cytoskeleton-associated protein 2 OS=Rattus norvegicus OX=10116 GN=Ckap2 PE=1 SV=1 - [D3ZPD0_RAT]	118.848	5.47	2	3	4	4	1.04578	3	1.44092	1.14798	3	5.54521	0.997598	3	3.99869	0.990389	3	7.08946	0.925297	3	9.33329	0.902978	3	4.0077	1.02843	3	3.441	0.923439	3	0.954456	1.16872	3	5.63775	676	75.3841	9.12939
A0A0G2JU12	Microsomal glutathione S-transferase 2 OS=Rattus norvegicus OX=10116 GN=Mgst2 PE=1 SV=1 - [A0A0G2JU12_RAT]	118.43	10.94	1	1	1	2	0.834004	2	4.52049	0.920398	2	6.83869	1.02063	2	0.0950016	1.07895	2	7.0885	1.096	2	4.61143	1.01636	2	1.24283	1.04876	2	0.0652633	1.07811	2	4.25052	0.833953	2	3.41525	128	14.819	9.77393
F1M775	Protein diaphanous homolog 1 OS=Rattus norvegicus OX=10116 GN=Diaph1 PE=1 SV=3 - [DIAP1_RAT]	118.27	7.59	1	9	9	11	0.914658	11	2.98425	0.96416	11	7.49098	1.03285	11	5.30426	1.03448	11	3.55904	1.01523	11	6.71777	1.03203	11	5.86967	1.00425	11	2.91665	1.00755	11	6.68763	0.947235	11	2.80182	1265	140.32	5.5415
D3ZW08	Adenylosuccinate lyase OS=Rattus norvegicus OX=10116 GN=Adsl PE=1 SV=1 - [D3ZW08_RAT]	118.147	5.79	1	3	3	4	0.907725	4	6.43249	0.90551	4	3.41424	1.02575	4	3.4022	0.982583	4	4.53177	1.077	4	2.40984	1.02451	4	1.50367	1.04107	4	6.36729	1.04395	4	3.90691	0.932078	4	4.8999	484	54.8169	7.10791
D3ZPW7	Glutathione peroxidase OS=Rattus norvegicus OX=10116 GN=Gpx8 PE=3 SV=1 - [D3ZPW7_RAT]	118.005	18.66	1	4	4	4	1.2277	4	7.7926	1.24153	4	6.09846	0.936054	4	8.21696	0.904198	4	2.96061	0.931049	4	9.27083	0.923435	4	4.29257	0.935895	4	7.87625	0.924801	4	7.68644	1.18118	4	9.43177	209	24.1277	9.34912
Q6TQE1	Zinc finger CCCH domain-containing protein 18 OS=Rattus norvegicus OX=10116 GN=Zc3h18 PE=1 SV=1 - [ZCH18_RAT]	117.787	8.24	3	4	6	14	1.01769	7	6.04668	1.02638	7	6.09498	1.02853	7	2.05473	0.9519	7	2.66375	1.03052	7	5.08573	0.968014	7	3.64053	1.00051	7	2.64185	0.99675	7	5.58646	1.03713	7	8.84959	947	105.474	8.00146
P17955	Nuclear pore glycoprotein p62 OS=Rattus norvegicus OX=10116 GN=Nup62 PE=1 SV=1 - [NUP62_RAT]	117.707	3.81	1	2	2	3	0.98743	3	1.96495	1.05912	3	2.22725	0.998164	3	0.437856	1.01591	3	2.88575	0.960281	3	0.526067	1.03776	3	1.80659	0.998978	3	0.314983	0.99998	3	6.65067	1.00995	3	0.677618	525	53.3645	5.31299
Q4V8H5	Aspartyl aminopeptidase OS=Rattus norvegicus OX=10116 GN=Dnpep PE=1 SV=1 - [Q4V8H5_RAT]	117.7	6.11	3	2	3	4	0.873893	3	5.61914	0.689664	3	1.2407	1.04904	3	1.80378	1.05482	3	11.7498	1.06778	3	6.14213	1.03325	3	2.46683	1.08477	3	2.4276	0.984809	3	16.5874	0.879906	3	17.5156	475	52.5219	7.25439
D3ZNI3	Programmed cell death 11 OS=Rattus norvegicus OX=10116 GN=Pdcd11 PE=1 SV=1 - [D3ZNI3_RAT]	117.679	3.57	5	5	6	6	0.922321	5	15.5094	0.882632	5	12.6177	1.02277	5	5.92563	1.02442	5	6.95884	0.990641	5	1.97744	1.0862	5	4.0847	1.00998	5	6.71311	1.02237	5	0.066789	0.859847	5	2.97678	1876	209.347	8.89502
P62912	60S ribosomal protein L32 OS=Rattus norvegicus OX=10116 GN=Rpl32 PE=1 SV=2 - [RL32_RAT]	117.639	54.07	10	9	9	10	0.969226	10	9.03489	1.0301	10	12.0733	1.06839	10	5.01979	1.10771	10	3.22795	0.947202	10	14.5177	1.08619	10	12.3626	0.957306	10	11.2882	0.898996	10	7.37684	0.930978	10	12.3315	135	15.8498	11.3267
Q4V8I6	60S ribosomal protein L11 OS=Rattus norvegicus OX=10116 GN=Rpl11 PE=1 SV=1 - [Q4V8I6_RAT]	116.962	31.14	7	6	6	7	0.941102	6	2.4206	0.930701	6	4.38496	1.05427	6	5.87778	1.02908	6	1.87206	1.05478	6	10.4281	1.04403	6	4.60967	0.979825	6	8.11809	1.01468	6	8.04299	0.961442	6	5.07699	167	19.0121	9.80322
P85973	Purine nucleoside phosphorylase OS=Rattus norvegicus OX=10116 GN=Pnp PE=1 SV=1 - [PNPH_RAT]	116.911	13.15	2	4	5	7	1.09107	5	3.11277	1.00926	5	9.4883	0.979521	5	1.72821	1.05043	5	5.10353	0.939266	5	4.01558	1.06585	5	1.62529	0.951274	5	1.40482	0.936998	5	5.52983	0.973315	5	9.17419	289	32.281	6.93213
G3V9Z6	Septin 8 (Predicted) OS=Rattus norvegicus OX=10116 GN=Sept8 PE=1 SV=1 - [G3V9Z6_RAT]	116.584	14.92	7	3	8	10	1.09968	3	22.6564	0.998941	3	11.1193	0.966974	3	9.33251	0.969765	3	10.5429	0.919645	3	20.6504	0.870517	3	29.5499	0.918277	3	29.4194	0.794277	3	5.62215	1.1807	3	11.9423	429	49.8252	5.99854
D4AE49	Mtr4 exosome RNA helicase OS=Rattus norvegicus OX=10116 GN=Mtrex PE=1 SV=3 - [D4AE49_RAT]	116.541	3.75	2	4	4	5	1.02613	5	5.1778	1.01659	5	9.66054	0.985055	5	3.20928	1.01001	5	1.10918	0.990705	5	6.21794	1.03849	5	4.07231	0.99087	5	3.32702	0.981115	5	4.46715	1.01277	5	8.12755	1066	120.626	6.65381
P18421	Proteasome subunit beta type-1 OS=Rattus norvegicus OX=10116 GN=Psmb1 PE=1 SV=3 - [PSB1_RAT]	116.372	19.58	6	4	5	7	0.975417	6	9.6907	0.92986	6	8.73584	1.01652	6	6.65245	1.02025	6	2.43658	1.01615	6	9.99385	1.00782	6	4.34618	1.06636	6	8.47734	1.04097	6	7.67151	0.902575	6	10.0453	240	26.4623	7.35693
D3ZEZ9	Supervillin OS=Rattus norvegicus OX=10116 GN=Svil PE=1 SV=3 - [D3ZEZ9_RAT]	116.281	4.11	14	5	8	8	1.15207	5	1.85337	1.09648	5	2.38867	0.934607	5	5.35777	0.918823	5	2.20931	0.946366	5	2.36584	0.920936	5	2.73647	0.96763	5	0.364175	1.0088	5	9.46766	1.16529	5	2.35422	1923	215.343	6.63916
P07154	Procathepsin L OS=Rattus norvegicus OX=10116 GN=Ctsl PE=1 SV=2 - [CATL1_RAT]	116.28	9.58	1	3	3	4	1.25253	4	9.63283	1.22909	4	14.8563	0.878679	4	5.13032	0.948846	4	2.47742	0.917893	4	9.31423	0.927776	4	4.47293	0.907967	4	5.21046	0.910752	4	3.43559	1.20456	4	9.23805	334	37.636	6.82959
D4AE17	Mitogen-activated protein kinase kinase kinase 20 OS=Rattus norvegicus OX=10116 GN=Map3k20 PE=1 SV=1 - [D4AE17_RAT]	116.07	4.42	1	2	2	4	1.02125	4	7.5052	1.01604	4	1.98977	1.00306	4	2.68451	0.999701	4	3.33369	1.02722	4	5.36553	0.938961	4	0.94438	1.03719	4	3.25359	1.08812	4	2.93692	0.927647	4	4.93985	453	51.2841	5.30029
Q9Z2Z8	7-dehydrocholesterol reductase OS=Rattus norvegicus OX=10116 GN=Dhcr7 PE=1 SV=1 - [DHCR7_RAT]	116.067	6.16	1	3	3	4	1.14695	4	6.51436	1.11604	4	15.4927	0.933985	4	4.51348	0.975775	4	2.31808	0.956601	4	13.5268	0.953462	4	1.10419	0.928311	4	14.2184	0.936853	4	4.74381	1.1718	4	7.5063	471	54.1194	8.35303
P70645	Bleomycin hydrolase OS=Rattus norvegicus OX=10116 GN=Blmh PE=1 SV=1 - [BLMH_RAT]	116.018	16.96	3	6	6	7	0.995638	7	9.30527	1.04421	7	6.41063	1.00523	7	6.18658	1.01115	7	3.064	0.973215	7	7.41058	1.00237	7	3.44515	0.981637	7	6.46913	0.976088	7	11.0465	1.01243	7	14.1146	454	52.2888	6.48096
D3ZCT7	Protein transport protein SEC23 OS=Rattus norvegicus OX=10116 GN=Sec23b PE=1 SV=2 - [D3ZCT7_RAT]	115.482	4.04	1	2	2	4	0.96272	4	2.68326	0.986228	4	3.1386	0.985726	4	1.39403	0.983979	4	1.18021	0.995131	4	5.52388	1.05922	4	3.56905	0.982716	4	3.12164	1.00398	4	1.19189	1.06056	4	0.646886	767	86.2996	6.93213
A0A0G2K6R8	EH domain-binding protein 1-like 1 OS=Rattus norvegicus OX=10116 GN=Ehbp1l1 PE=1 SV=1 - [A0A0G2K6R8_RAT]	115.44	4.53	5	5	5	5	0.994751	5	3.33202	1.01224	5	4.62342	0.972138	5	3.58558	0.981214	5	5.65301	0.98249	5	3.86523	0.996167	5	1.74012	1.02568	5	2.3844	1.01172	5	5.19835	1.06374	5	3.42289	1699	182.405	4.81787
P59215	Guanine nucleotide-binding protein G(o) subunit alpha OS=Rattus norvegicus OX=10116 GN=Gnao1 PE=1 SV=2 - [GNAO_RAT]	115.28	8.76	7	1	3	4	0.984675	1		1.05221	1		0.968025	1		0.990562	1		0.99883	1		1.04022	1		0.950783	1		1.02542	1		1.03269	1		354	40.0429	5.52881
A0A0G2JY68	Ribosomal L1 domain-containing protein 1-like OS=Rattus norvegicus OX=10116 GN=Rsl1d1l1 PE=1 SV=1 - [A0A0G2JY68_RAT]	115.212	8.48	2	2	3	3	0.905169	2	2.20201	0.884771	2	1.61128	1.01766	2	1.34151	1.03574	2	4.51408	1.0128	2	0.106633	1.08384	2	0.176764	1.04138	2	1.06883	1.0592	2	3.32274	0.901422	2	2.71582	460	51.4566	9.96436
A0A0G2JU01	Rho guanine nucleotide exchange factor 1 OS=Rattus norvegicus OX=10116 GN=Arhgef1 PE=1 SV=1 - [A0A0G2JU01_RAT]	115.197	3.6	6	2	2	3	0.989072	3	2.37127	0.98412	3	4.56399	0.980758	3	6.41622	1.04145	3	0.380963	1.02378	3	4.16026	1.019	3	0.312524	1.03558	3	0.957251	0.987666	3	3.11655	0.964199	3	3.12189	862	96.6247	5.78271
P0C5H9	Mesencephalic astrocyte-derived neurotrophic factor OS=Rattus norvegicus OX=10116 GN=Manf PE=1 SV=1 - [MANF_RAT]	115.024	34.64	1	8	8	8	1.01475	8	8.23506	1.0342	8	11.6864	1.01331	8	2.04124	1.01907	8	2.66858	0.956776	8	7.77348	1.02031	8	5.55502	1.00802	8	6.56919	0.939337	8	14.2366	0.99984	8	6.80173	179	20.3746	8.25049
Q32PY7	Nudcd3 protein OS=Rattus norvegicus OX=10116 GN=Nudcd3 PE=2 SV=1 - [Q32PY7_RAT]	114.94	10.37	17	2	3	3	0.979736	2	1.64318	0.954776	2	2.74968	0.991053	2	2.96094	1.01746	2	1.96731	1.01916	2	4.93875	0.972422	2	7.21364	1.05756	2	10.6423	1.08942	2	4.0296	0.925344	2	6.18206	299	33.1301	6.26514
Q91VC0	dCTP pyrophosphatase 1 OS=Rattus norvegicus OX=10116 GN=Dctpp1 PE=2 SV=1 - [DCTP1_RAT]	114.894	12.94	1	2	2	4	0.974936	4	8.85635	1.00127	4	5.49173	1.01696	4	3.7429	1.01367	4	1.24432	1.01068	4	1.70499	0.988267	4	6.2945	1.01644	4	7.10669	1.00222	4	1.49359	0.965509	4	5.06955	170	18.4621	4.89404
F7FLB2	Pgm2 protein OS=Rattus norvegicus OX=10116 GN=Pgm2 PE=1 SV=2 - [F7FLB2_RAT]	114.777	9.35	2	5	5	7	1.00635	7	2.22973	1.02144	7	4.40907	0.990152	7	2.18381	0.992754	7	3.81375	0.98636	7	4.26906	0.984647	7	5.93002	0.996899	7	2.10169	1.00168	7	2.08679	1.02446	7	1.46271	620	69.0146	6.34131
Q6AYU1	Mortality factor 4-like protein 1 OS=Rattus norvegicus OX=10116 GN=Morf4l1 PE=2 SV=1 - [MO4L1_RAT]	114.681	6.81	1	2	2	4	1.26621	4	7.84152	1.26928	4	9.70246	0.910615	4	2.3605	0.948557	4	2.13827	0.875786	4	10.3516	0.94064	4	4.32139	0.892737	4	10.8012	0.920525	4	9.88729	1.22516	4	9.22903	323	37.1773	9.18799
P62832	60S ribosomal protein L23 OS=Rattus norvegicus OX=10116 GN=Rpl23 PE=2 SV=1 - [RL23_RAT]	114.64	34.29	1	5	5	8	0.959165	8	6.29148	0.968545	8	5.5948	0.979126	8	2.22634	1.01093	8	4.63225	1.05599	8	3.17195	0.997738	8	3.81518	1.04429	8	4.22135	0.992659	8	11.2112	0.983738	8	6.56033	140	14.8561	10.5063
F1LSM5	Nck-associated protein 1 OS=Rattus norvegicus OX=10116 GN=Nckap1 PE=1 SV=3 - [F1LSM5_RAT]	114.554	4.03	4	5	5	6	0.977023	6	9.36116	0.975242	6	3.88794	0.986472	6	3.46976	0.978568	6	5.83891	1.03459	6	15.5076	1.00964	6	1.98411	1.04493	6	6.52749	1.03903	6	5.98682	0.952791	6	19.9045	1093	124.538	6.63916
D3ZD97	RNA helicase OS=Rattus norvegicus OX=10116 GN=Dhx15 PE=1 SV=1 - [D3ZD97_RAT]	114.529	8.81	1	8	8	9	1.05246	9	3.35418	1.0619	9	4.98658	1.00395	9	7.49017	0.989211	9	1.37134	0.982811	9	4.81314	0.963159	9	5.1321	0.992408	9	11.9031	0.987622	9	5.75404	1.05162	9	7.38058	795	90.9192	7.45947
D3ZZL3	N-acetyl-alpha-glucosaminidase OS=Rattus norvegicus OX=10116 GN=Naglu PE=1 SV=2 - [D3ZZL3_RAT]	114.367	4.33	1	2	2	2	0.968924	2	0.273672	0.984897	2	0.423568	1.00711	2	0.415428	1.03751	2	4.18105	1.00173	2	0.529833	1.01051	2	5.93814	1.01433	2	0.242218	1.00881	2	0.432561	0.969942	2	3.41111	739	82.3597	6.25244
Q641Z6	EH domain-containing protein 1 OS=Rattus norvegicus OX=10116 GN=Ehd1 PE=1 SV=1 - [EHD1_RAT]	113.861	9.18	1	3	6	7	1.11291	4	6.06782	1.08432	4	6.85332	0.984117	4	6.29085	0.969878	4	2.14364	0.955034	4	2.61124	0.961861	4	1.73188	0.971258	4	5.32088	0.977607	4	5.48461	1.08254	4	13.7706	534	60.5646	6.82959
G3V9M1	RNA helicase OS=Rattus norvegicus OX=10116 GN=Ddx23 PE=1 SV=1 - [G3V9M1_RAT]	113.406	9.04	2	7	7	7	1.02834	7	6.89575	1.08102	7	2.54051	0.977295	7	5.35274	1.00294	7	5.0961	0.99334	7	6.03645	0.982411	7	4.35158	1.00715	7	5.80435	0.974245	7	11.4486	1.06837	7	5.89593	819	95.4379	9.5835
P04904	Glutathione S-transferase alpha-3 OS=Rattus norvegicus OX=10116 GN=Gsta3 PE=1 SV=3 - [GSTA3_RAT]	113.339	14.93	13	4	4	5	0.7679	5	26.2802	0.779539	5	17.6782	1.1146	5	6.69656	1.14718	5	17.5581	0.962453	5	11.9623	1.22662	5	14.4205	1.03647	5	7.27812	1.01015	5	4.11949	0.748247	5	33.618	221	25.3033	8.74854
P47727	Carbonyl reductase [NADPH] 1 OS=Rattus norvegicus OX=10116 GN=Cbr1 PE=1 SV=2 - [CBR1_RAT]	113.31	19.49	6	4	5	6	0.913447	5	8.96954	0.944308	5	2.26491	1.02483	5	3.54305	1.04499	5	1.58891	1.03023	5	1.94379	1.0424	5	2.42561	1.0566	5	1.10413	1.06397	5	5.2435	0.912611	5	3.75308	277	30.5589	8.06006
F1MA87	Cyclin-dependent kinase 6 OS=Rattus norvegicus OX=10116 GN=Cdk6 PE=1 SV=2 - [F1MA87_RAT]	113.142	8.59	1	2	2	2	1.07455	2	2.0801	1.09057	2	0.13067	0.975352	2	6.71332	1.0461	2	1.52957	0.887378	2	5.16916	1.05997	2	3.62481	0.887184	2	8.45749	0.914134	2	1.7714	1.11883	2	14.4568	326	36.9291	6.69775
Q8CHN5	Epididymal secretory protein E1 OS=Rattus norvegicus OX=10116 GN=re1 PE=2 SV=1 - [Q8CHN5_RAT]	113.104	19.46	2	3	3	6	1.24787	6	5.42417	1.27633	6	6.25676	0.889294	6	5.29735	0.939171	6	2.75511	0.894492	6	4.06131	0.958448	6	2.4459	0.849951	6	3.1451	0.886526	6	4.92729	1.34504	6	7.8417	149	16.3534	7.63525
Q5U312	Ankycorbin OS=Rattus norvegicus OX=10116 GN=Rai14 PE=1 SV=2 - [RAI14_RAT]	112.933	7.57	1	7	7	9	0.961823	9	10.3345	0.939577	9	2.56255	1.02197	9	2.04624	1.00574	9	2.55746	1.02323	9	1.82464	1.0249	9	3.29973	1.02653	9	5.29826	1.03488	9	2.87577	0.948618	9	6.30617	978	109.066	6.15088
M0R544	Glucosidase, alpha, acid, isoform CRA_a OS=Rattus norvegicus OX=10116 GN=Gaa PE=1 SV=1 - [M0R544_RAT]	112.555	3.57	2	3	3	4	0.967019	4	6.43007	0.947058	4	6.60355	1.00219	4	6.33005	1.03117	4	5.21398	0.996275	4	1.974	1.05601	4	5.5328	0.96256	4	4.71911	1.01815	4	1.75918	1.00804	4	3.33459	953	106.136	5.68115
P55770	NHP2-like protein 1 OS=Rattus norvegicus OX=10116 GN=Snu13 PE=2 SV=4 - [NH2L1_RAT]	112.487	29.69	2	4	4	5	0.835657	5	7.33656	0.87188	5	7.48566	1.07975	5	3.67605	1.03411	5	6.15318	1.05233	5	10.9615	1.03621	5	7.51803	1.04895	5	11.7987	1.06915	5	11.8881	0.92281	5	6.95708	128	14.1646	8.45557
P08082	Clathrin light chain B OS=Rattus norvegicus OX=10116 GN=Cltb PE=1 SV=1 - [CLCB_RAT]	111.961	24.02	1	6	6	6	1.01055	6	6.36892	0.975132	6	5.90665	1.01694	6	8.36963	1.03597	6	3.03333	0.944964	6	7.40164	1.02633	6	7.14631	0.966459	6	8.53232	0.975893	6	9.39415	0.998524	6	7.80615	229	25.1021	4.62744
Q4G063	Protein disulfide isomerase Creld2 OS=Rattus norvegicus OX=10116 GN=Creld2 PE=1 SV=1 - [CREL2_RAT]	111.721	19.2	1	6	6	7	1.12997	7	4.4092	1.14689	7	7.7824	0.955648	7	6.72856	0.946172	7	8.21633	0.99116	7	7.91168	0.93541	7	4.89955	0.983237	7	8.13916	0.950147	7	11.0627	1.1122	7	4.38545	349	38.2249	4.56396
A0A0G2QC53	Epidermal growth factor receptor pathway substrate 15-like 1 OS=Rattus norvegicus OX=10116 GN=Eps15l1 PE=2 SV=1 - [A0A0G2QC53_RAT]	111.6	3.19	2	2	2	3	0.972582	3	1.91534	1.05558	3	12.067	0.981343	3	3.73391	1.03695	3	1.43602	0.949477	3	0.232309	1.03103	3	3.21122	0.985657	3	5.8304	0.980911	3	9.23677	1.06088	3	2.90749	878	96.3871	5.07178
P97538	Ras-related protein M-Ras OS=Rattus norvegicus OX=10116 GN=Mras PE=1 SV=2 - [RASM_RAT]	111.569	5.29	2	1	1	2	0.947076	2	1.65962	0.951616	2	4.30387	0.990358	2	1.33923	1.073	2	0.989	1.00258	2	1.7399	1.04521	2	1.35039	0.98439	2	1.30912	1.00985	2	2.22746	0.979559	2	0.809861	208	23.8724	8.77783
D4A6X4	Acylphosphatase OS=Rattus norvegicus OX=10116 GN=Acyp1 PE=1 SV=1 - [D4A6X4_RAT]	111.487	20.2	1	2	2	3	0.926313	3	5.22456	0.88996	3	4.64221	1.02891	3	3.93353	1.01858	3	4.45514	0.996779	3	3.66366	1.0376	3	0.782005	1.02733	3	2.35278	1.03293	3	3.77535	0.967895	3	3.84032	99	11.3048	9.30518
Q811S9	Guanine nucleotide-binding protein-like 3 OS=Rattus norvegicus OX=10116 GN=Gnl3 PE=1 SV=1 - [GNL3_RAT]	111.41	6.69	8	2	3	4	0.761299	3	0.970009	0.794776	3	9.99584	1.1194	3	3.96359	1.11802	3	0.678231	1.02023	3	6.27776	1.18445	3	0.673543	1.03704	3	11.0145	1.07556	3	3.32086	0.77401	3	4.0289	538	60.6227	9.14404
F1LNH3	Collagen type VI alpha 2 chain OS=Rattus norvegicus OX=10116 GN=Col6a2 PE=1 SV=2 - [F1LNH3_RAT]	111.243	7.59	8	8	8	9	1.02804	9	10.347	1.0389	9	9.39263	0.981032	9	10.1897	0.898923	9	1.95133	1.0128	9	7.86154	0.887781	9	5.02735	1.07327	9	12.1967	1.08487	9	11.9588	1.04916	9	15.9434	1027	109.591	6.60986
Q711G3	Isoamyl acetate-hydrolyzing esterase 1 homolog OS=Rattus norvegicus OX=10116 GN=Iah1 PE=2 SV=2 - [IAH1_RAT]	111.207	10.84	1	2	2	3	0.884798	3	4.42223	0.885237	3	1.53603	1.02331	3	1.52056	1.05879	3	6.57216	1.01878	3	0.616941	1.04721	3	1.08293	1.00794	3	2.79972	1.03294	3	4.53574	0.890988	3	6.03425	249	27.9864	5.94775
A0A0G2KAI8	Developmentally-regulated GTP-binding protein 2 OS=Rattus norvegicus OX=10116 GN=Drg2 PE=1 SV=1 - [A0A0G2KAI8_RAT]	111.185	10.44	1	3	3	3	0.874922	3	6.03551	0.915175	3	1.15663	0.996779	3	0.689057	1.07886	3	3.30333	0.980447	3	0.28062	1.03958	3	8.60488	1.03112	3	4.29114	1.03072	3	0.0764603	0.937516	3	4.00296	364	40.5315	9.34912
A0A0G2JUR5	Myosin phosphatase Rho-interacting protein OS=Rattus norvegicus OX=10116 GN=Mprip PE=1 SV=1 - [A0A0G2JUR5_RAT]	111.036	2.31	5	3	5	6	0.965869	4	3.36054	1.00082	4	11.2371	1.03061	4	9.11844	0.988573	4	0.0764392	0.997879	4	5.99072	0.964465	4	5.20334	1.07297	4	8.92537	1.0588	4	3.79162	0.969779	4	15.3242	2123	239.928	5.40186
D4A9K3	D-aminoacyl-tRNA deacylase OS=Rattus norvegicus OX=10116 GN=Dtd1 PE=1 SV=1 - [D4A9K3_RAT]	110.52	8.62	2	1	1	1	0.861626	1		0.874957	1		0.958937	1		1.07575	1		1.04534	1		1.10757	1		1.04431	1		1.05651	1		0.909621	1		174	19.6241	8.1626
B2GUV5	V-type proton ATPase subunit G OS=Rattus norvegicus OX=10116 GN=Atp6v1g1 PE=1 SV=1 - [B2GUV5_RAT]	110.518	13.56	1	1	2	3	1.00682	2	4.67688	1.01883	2	2.40136	0.962773	2	4.01415	0.987179	2	0.402769	1.00015	2	2.2966	1.04778	2	0.787597	1.0258	2	0.982107	1.01887	2	0.201002	0.961493	2	0.00113299	118	13.702	7.28369
A0A0G2K4R7	RNA-binding motif, single-stranded-interacting protein 1 OS=Rattus norvegicus OX=10116 GN=Rbms1 PE=1 SV=1 - [A0A0G2K4R7_RAT]	110.487	11.91	6	4	5	7	1.0175	6	4.45427	1.00975	6	10.6379	0.970319	6	5.57977	0.993491	6	3.43309	0.976268	6	7.44695	1.05002	6	4.85758	0.959006	6	9.94755	0.9866	6	5.24905	1.10742	6	16.9734	403	43.7477	8.82178
Q6AYG5	Ethylmalonyl-CoA decarboxylase OS=Rattus norvegicus OX=10116 GN=Echdc1 PE=1 SV=1 - [ECHD1_RAT]	110.316	14.72	1	4	4	5	1.02816	5	3.82081	0.984595	5	4.59196	1.01003	5	1.07685	0.998365	5	5.49552	1.00497	5	5.32593	0.988533	5	7.29771	1.01505	5	0.587082	1.04803	5	3.27189	0.930787	5	1.63501	299	32.61	7.03467
F1LY19	RCG38820 OS=Rattus norvegicus OX=10116 GN=Upf1 PE=1 SV=3 - [F1LY19_RAT]	110.149	9.52	2	9	9	10	1.01894	10	6.80543	0.990493	10	13.6953	0.984062	10	1.65424	0.978453	10	7.16538	0.958636	10	6.94814	1.00469	10	5.04185	0.983716	10	9.32091	1.02068	10	7.27517	1.0664	10	12.367	1113	122.566	6.68311
Q505J8	Phenylalanine--tRNA ligase alpha subunit OS=Rattus norvegicus OX=10116 GN=Farsa PE=1 SV=1 - [SYFA_RAT]	110.016	10.83	1	6	6	6	0.933436	6	7.78648	0.975376	6	7.63642	1.05246	6	0.714471	1.01745	6	5.67407	1.05729	6	4.84042	1.01311	6	5.41577	1.04646	6	7.55059	1.04203	6	3.68454	0.930997	6	3.65787	508	57.6837	8.27979
Q66H94	Peptidyl-prolyl cis-trans isomerase FKBP9 OS=Rattus norvegicus OX=10116 GN=Fkbp9 PE=2 SV=1 - [FKBP9_RAT]	109.767	7.54	1	5	5	5	1.17416	5	2.32175	1.16939	5	10.601	0.971375	5	8.10895	0.940481	5	1.61654	0.960656	5	5.74101	0.942407	5	1.91516	0.960605	5	10.7661	0.965684	5	6.6012	1.1544	5	18.7168	570	63.0865	5.09717
D4A857	Importin 9 OS=Rattus norvegicus OX=10116 GN=Ipo9 PE=1 SV=2 - [D4A857_RAT]	109.358	5.28	1	5	5	7	1.04619	7	7.41324	0.939935	7	13.6316	0.994095	7	4.09639	0.965243	7	8.35152	0.994705	7	7.87463	1.01741	7	4.03787	1.01129	7	6.03894	0.996278	7	9.61652	0.951038	7	11.1207	1041	115.938	4.80518
[truncated: 1,993 more rows]
