# Supplementary material for: TMT-based quantitative proteomics analysis reveals the effect of bovine derived MFG-E8 against oxidative stress on rat L6 cells
Source: Royal Society of Chemistry journal article supplement (doi:10.1039/d1fo01135a), 2021-01-01
Supplement: d1fo01135a2.xlsx [file d1fo01135a2.xlsx]

## Sheet: Sheet1
A2	Sequence	# PSMs	# Proteins	# Protein Groups	Protein Group Accessions	Modifications	ΔCn	126/(126+127_N+127_C+128_N+128_C+129_N+129_C+130_N+130_C)	126/(126+127_N+127_C+128_N+128_C+129_N+129_C+130_N+130_C) Count	126/(126+127_N+127_C+128_N+128_C+129_N+129_C+130_N+130_C) Variability [%]	127_N/(126+127_N+127_C+128_N+128_C+129_N+129_C+130_N+130_C)	127_N/(126+127_N+127_C+128_N+128_C+129_N+129_C+130_N+130_C) Count	127_N/(126+127_N+127_C+128_N+128_C+129_N+129_C+130_N+130_C) Variability [%]	128_C/(126+127_N+127_C+128_N+128_C+129_N+129_C+130_N+130_C)	128_C/(126+127_N+127_C+128_N+128_C+129_N+129_C+130_N+130_C) Count	128_C/(126+127_N+127_C+128_N+128_C+129_N+129_C+130_N+130_C) Variability [%]	128_N/(126+127_N+127_C+128_N+128_C+129_N+129_C+130_N+130_C)	128_N/(126+127_N+127_C+128_N+128_C+129_N+129_C+130_N+130_C) Count	128_N/(126+127_N+127_C+128_N+128_C+129_N+129_C+130_N+130_C) Variability [%]	129_C/(126+127_N+127_C+128_N+128_C+129_N+129_C+130_N+130_C)	129_C/(126+127_N+127_C+128_N+128_C+129_N+129_C+130_N+130_C) Count	129_C/(126+127_N+127_C+128_N+128_C+129_N+129_C+130_N+130_C) Variability [%]	129_N/(126+127_N+127_C+128_N+128_C+129_N+129_C+130_N+130_C)	129_N/(126+127_N+127_C+128_N+128_C+129_N+129_C+130_N+130_C) Count	129_N/(126+127_N+127_C+128_N+128_C+129_N+129_C+130_N+130_C) Variability [%]	130_C/(126+127_N+127_C+128_N+128_C+129_N+129_C+130_N+130_C)	130_C/(126+127_N+127_C+128_N+128_C+129_N+129_C+130_N+130_C) Count	130_C/(126+127_N+127_C+128_N+128_C+129_N+129_C+130_N+130_C) Variability [%]	130_N/(126+127_N+127_C+128_N+128_C+129_N+129_C+130_N+130_C)	130_N/(126+127_N+127_C+128_N+128_C+129_N+129_C+130_N+130_C) Count	130_N/(126+127_N+127_C+128_N+128_C+129_N+129_C+130_N+130_C) Variability [%]	127_C/(126+127_N+127_C+128_N+128_C+129_N+129_C+130_N+130_C)	127_C/(126+127_N+127_C+128_N+128_C+129_N+129_C+130_N+130_C) Count	127_C/(126+127_N+127_C+128_N+128_C+129_N+129_C+130_N+130_C) Variability [%]	q-Value	PEP	IonScore	Exp Value	Charge	MH+ [Da]	ΔM [ppm]	RT [min]	# Missed Cleavages
High	aASGSGAQVGGSISSGSSASSVTVTR	12	2	1	G3V8L3	N-Term(TMT10)	0	1.02077	12	12.5104	1.03528	12	24.7495	0.919152	12	17.3796	0.894863	12	10.2052	1.06874	12	5.2657	0.93797	12	6.02939	1.09117	12	9.80388	1.00836	12	10.2243	1.12597	12	12.5005	0	4.68346e-25	215	5.94508e-21	2	2497.27	1.39728	56.7527	0
High	qSAEEQAQAQAQAQAAAEk	6	12	1	Q6S3A0	N-Term(TMT10); K19(TMT10)	0	1.00632	6	4.18642	1.02194	6	0.979343	0.990769	6	3.15269	0.98214	6	2.00798	1.04257	6	1.19538	0.965896	6	1.25152	1.0185	6	5.37916	1.03038	6	2.0475	0.986103	6	4.72707	0	9.028e-19	164.03	8.53992e-16	2	2416.25	0.576644	58.7791	0
High	gAGTGGLGLTVEGPcEAk	7	4	2	A0A0H2UHR7;D4A8D5	N-Term(TMT10); C15(Carbamidomethyl); K18(TMT10)	0																												0	8.241e-16	154.16	1.03601e-14	2	2132.15	1.76554	72.0945	0
High	lVQDVANNTNEEAGDGTTTATVLAR	6	1	1	P63039	N-Term(TMT10)	0	1.01081	6	6.09343	1.01333	6	6.89993	1.00116	6	3.386	1.04369	6	2.12036	0.964233	6	3.06951	1.01534	6	2.76651	0.972219	6	2.73845	1.00041	6	3.45086	1.02552	6	2.86124	0	1.148e-18	151.91	1.27868e-14	2	2789.42	2.5688	78.0956	0
High	gAGTGGLGLAVEGPSEAk	5	1	1	C0JPT7	N-Term(TMT10); K18(TMT10)	0	0.955556	5	6.13756	1.02395	5	2.7009	0.978568	5	0.68182	1.01325	5	0.848913	0.975405	5	5.72862	1.02531	5	2.0845	0.986228	5	2.57911	1.01269	5	1.34203	1.04981	5	4.3008	0	1.643e-15	148.37	3.90791e-14	2	2029.14	1.68885	69.7437	0
High	lLDAQLATGGIVDPR	4	12	1	Q6S3A0	N-Term(TMT10)	0	0.968946	4	3.3612	0.898181	4	15.6631	0.984478	4	5.72154	0.983382	4	8.2378	1.01284	4	5.58604	1.09809	4	4.06267	0.969678	4	0.799205	1.05377	4	11.7856	0.981401	4	3.60164	0	1.475e-11	146.26	7.0741e-14	2	1768.02	1.97164	86.1852	0
High	eAEAAEPEQPEQPEQPAAEEPR	6	2	1	F1LMW7	N-Term(TMT10)	0	1.27645	6	24.9013	1.19869	6	28.6732	0.943113	6	8.56368	0.902572	6	6.25153	0.963789	6	14.0708	0.870621	6	15.1477	0.921283	6	25.5439	0.977017	6	16.1829	1.19926	6	15.4985	0	1.548e-16	143.92	2.77773e-14	2	2661.25	0.629786	51.6901	0
High	nMGGPYGGGNYGPGGSGGSGGYGGR	2	4	1	F1LM82	N-Term(TMT10)	0	1.14565	2	5.96095	0.900037	2	12.9213	1.01301	2	8.71679	0.836499	2	4.55592	1.1311	2	2.52302	0.851607	2	7.01822	1.14107	2	14.1365	1.15246	2	2.42071	0.917705	2	3.23988	0	8.793e-18	143.23	7.84303e-15	2	2419.07	-0.297118	58.5804	0
High	gTQGATAGASSELDASk	3	2	1	Q32PZ7	N-Term(TMT10); K17(TMT10)	0	0.940082	3	4.34682	0.950189	3	7.03693	1.04083	3	0.832746	0.992152	3	5.31362	0.973494	3	3.75152	1.00534	3	3.28892	0.970768	3	8.14516	0.978529	3	0.626455	1.01254	3	2.15547	0	7.324e-17	143.17	1.12294e-13	2	2009.06	1.15846	55.4298	0
High	gPQVcGELQGSGTDVNLk	4	2	1	A0A0G2JUA5	N-Term(TMT10); C5(Carbamidomethyl); K18(TMT10)	0	1.20618	4	2.66754	1.29101	4	3.36055	0.899458	4	2.00514	0.93867	4	2.1445	0.887271	4	2.48519	0.921634	4	1.8453	0.871488	4	2.28225	0.863802	4	3.16151	1.36056	4	1.90275	0	3.84e-17	142.72	1.54489e-13	2	2317.22	1.01314	68.8458	0
High	sLPSVETLGcTSVIcSDk	4	7	2	P11507;Q64578	N-Term(TMT10); C10(Carbamidomethyl); C15(Carbamidomethyl); K18(TMT10)	0																												0	4.583e-17	142.63	1.28799e-13	2	2411.26	0.443137	83.3565	0
High	dAEDAMDAMDGAVLDGR	2	1	1	Q6PDU1	N-Term(TMT10)	0	1.07925	2	0.543264	1.10241	2	4.92616	0.972022	2	0.860926	0.990459	2	3.54023	0.957796	2	1.41553	1.01733	2	4.19808	0.939738	2	2.59532	0.96231	2	1.67347	1.05626	2	4.09012	0	3.746e-15	142.19	1.35888e-14	2	1980.89	1.56563	86.2513	0
High	qSPQSASLTFGEGTESPSAQScQQAk	2	1	1	F1LYQ8	N-Term(TMT10); C22(Carbamidomethyl); K26(TMT10)	0	1.14805	2	5.31712	1.05372	2	5.70302	0.942162	2	6.57935	0.99693	2	1.12572	1.01567	2	6.0609	0.955589	2	7.55048	0.95274	2	0.191283	0.965528	2	11.4423	1.07151	2	2.07511	0	1.308e-17	138.64	1.79856e-13	3	3169.55	0.897514	66.1508	0
High	vSHVSTGGGASLELLEGk	5	4	1	P16617	N-Term(TMT10); K18(TMT10)	0	1.01122	5	2.51241	1.01219	5	4.34197	0.861354	5	13.4563	0.940971	5	0.534236	0.931113	5	4.10136	1.02719	5	9.70918	0.989877	5	4.12422	1.00486	5	3.43511	1.38589	5	15.0191	0	5.692e-17	137.75	5.01962e-13	2	2199.24	2.31654	74.0958	0
High	gAGTGGLGLAIEGPSEAk	4	2	1	A0A0H2UHR7	N-Term(TMT10); K18(TMT10)	0	1.01896	4	5.1132	1.10451	4	7.97525	0.929052	4	4.37526	0.974725	4	2.37377	0.954389	4	2.45743	1.0215	4	3.14427	0.963437	4	8.43721	0.985816	4	4.39258	1.12661	4	5.46579	0	5.427e-15	136.04	7.7279e-13	2	2043.15	1.06757	75.1959	0
High	lSGSNPYTSVTPQIINSk	4	5	1	Q9QXQ0	N-Term(TMT10); K18(TMT10)	0	1.00618	4	2.37571	1.04089	4	3.75189	0.984003	4	0.553789	1.02315	4	0.785287	0.979821	4	4.07106	1.05688	4	2.48722	0.998058	4	3.52489	0.952919	4	0.4928	0.968738	4	3.27381	0	2.301e-14	134.54	1.08632e-12	2	2364.32	1.49608	80.7979	0
High	aLcQITDSTMLQAVER	2	2	1	Q4AEF8	N-Term(TMT10); C3(Carbamidomethyl)	0	1.26282	2	1.99842	1.25509	2	0.910205	0.958597	2	0.191077	0.989219	2	2.5426	0.85345	2	3.52373	0.980807	2	2.43487	0.786904	2	4.7778	0.797915	2	0.855651	1.31132	2	1.22824	0	1.324e-14	134.46	7.0545e-13	2	2065.06	0.966141	86.7322	0
High	lASVPAGGAVAVSAAPGSAAPAAGSAPAAAEEk	6	3	1	D4A4D5	N-Term(TMT10); K33(TMT10)	0	0.875906	6	5.93487	0.904533	6	8.73374	0.952476	6	2.16789	0.967244	6	3.63558	1.15376	6	1.96657	1.01021	6	2.48164	1.11285	6	2.89874	1.04467	6	2.48095	0.931505	6	3.7414	0	1.341e-15	133.28	1.41908e-12	3	3232.77	2.32332	74.0378	0
High	cVVTAEDGTQSEATVNVk	6	4	1	F1LUV9	N-Term(TMT10); C1(Carbamidomethyl); K18(TMT10)	0	1.01836	6	7.24703	1.02012	6	6.47208	0.969908	6	3.80478	0.944606	6	5.36127	1.08991	6	1.51027	0.926853	6	8.39842	1.07356	6	6.98132	1.05796	6	4.69295	0.950213	6	3.59051	0	6.533e-17	132.54	1.28989e-12	2	2366.23	1.91524	64.1691	0
High	nQVTATTADGSTQVIGTk	4	1	1	Q6P6R2	N-Term(TMT10); K18(TMT10)	0	0.92835	4	10.542	0.907832	4	1.34206	1.04181	4	3.49611	0.969549	4	2.98561	1.02731	4	1.66168	0.977431	4	9.56572	1.09662	4	5.13468	1.02595	4	1.71937	0.963397	4	11.6773	0	4.073e-17	132.46	1.72534e-12	2	2250.24	1.81916	62.3899	0
High	sVGGSGGGSFGDNLVTR	2	2	1	G3V8L3	N-Term(TMT10)	0	1.12513	2	2.15407	1.04902	2	6.81847	0.931386	2	2.32305	0.859783	2	5.09038	1.08711	2	7.37461	0.862887	2	4.11873	1.13253	2	1.38404	1.12541	2	3.1281	0.966958	2	6.54159	0	3.526e-15	132.06	9.02335e-13	2	1795.92	2.13527	63.4532	0
High	gQGSVSASITEGQQNEQ	12	1	1	Q5XFW8	N-Term(TMT10)	0	1.06746	12	7.58463	0.985595	12	10.2074	0.975135	12	7.95238	0.945582	12	6.03236	0.931283	12	8.3481	0.940335	12	7.54781	1.01709	12	5.84398	1.07109	12	7.01046	1.09398	12	8.35569	0	3.443e-12	131.6	5.91515e-13	2	1948.94	0.977654	55.4055	0
High	vIVVGNPANTNcLTASk	8	1	1	O88989	N-Term(TMT10); C12(Carbamidomethyl); K17(TMT10)	0	1.02663	8	2.40646	1.07995	8	4.22996	0.982783	8	2.02184	0.981537	8	1.72855	0.981695	8	5.37623	1.03365	8	3.37987	0.951028	8	2.98577	0.93752	8	4.37585	1.10018	8	5.35173	0	5.151e-15	130.67	3.0082e-12	2	2216.25	1.19946	76.2797	0
High	acGDSTLTQITAGLDPVGR	2	2	1	Q45QL6	N-Term(TMT10); C2(Carbamidomethyl)	0	1.12725	2	0.217773	1.1267	2	2.47739	0.99922	2	2.18161	1.06315	2	0.23923	0.843524	2	1.22083	1.10295	2	3.99372	0.838801	2	4.00774	0.824607	2	2.27604	1.13214	2	5.31951	0	1.495e-15	130.32	1.86258e-12	2	2161.12	1.33752	86.4211	0
High	gAGIGGLGITVEGPSESk	2	2	1	D4A8D5	N-Term(TMT10); K18(TMT10)	0	1.02895	2	3.58607	1.06827	2	6.2407	0.969907	2	3.80161	1.08152	2	0.850257	0.906647	2	5.66754	1.09486	2	0.270184	0.925001	2	4.62645	0.884811	2	1.52455	1.06161	2	6.08777	0	3.844e-15	130.11	3.15897e-12	2	2087.18	0.418531	81.0257	0
High	eAQLALGNAAADATEAk	1	3	1	F1MAA7	N-Term(TMT10); K17(TMT10)	0	0.934847	1		0.980078	1		0.972916	1		1.03615	1		1.00857	1		1.03724	1		1.00693	1		1.01608	1		1.01506	1		0	3.584e-15	130.08	2.9207e-12	2	2102.15	2.2049	74.2529	0
High	cSANccEDNQASMQQVHQcIER	1	1	1	B0BN94	N-Term(TMT10); C1(Carbamidomethyl); C5(Carbamidomethyl); C6(Carbamidomethyl); C19(Carbamidomethyl)	0	0.750344	1		0.827647	1		1.18647	1		0.982196	1		1.1997	1		0.903137	1		1.23538	1		1.06622	1		0.741676	1		0	1.606e-15	130.08	9.79422e-14	3	2954.23	1.06912	53.4423	0
High	aDNFEYSDPVDGSISk	2	3	1	Q499Q4	N-Term(TMT10); K16(TMT10)	0	1.00385	2	11.853	1.0337	2	10.1294	0.929914	2	9.44823	1.01338	2	4.3299	0.968244	2	10.0117	1.1399	2	11.9081	0.947847	2	4.82515	0.927624	2	9.60198	1.04371	2	6.31814	0	1.598e-14	130.03	1.5294e-12	2	2202.1	0.994166	75.6096	0
High	qAQQERDELADEIANSSGk	9	2	1	G3V6P7	N-Term(TMT10); K19(TMT10)	0	0.916959	9	10.1404	0.996873	9	2.55392	1.01719	9	2.762	0.998874	9	3.55266	1.03769	9	3.85719	1.00548	9	4.30214	1.03365	9	4.46923	1.03547	9	3.42151	0.948467	9	4.93894	0	1.265e-17	128.95	2.36872e-12	2	2547.31	1.35282	67.3282	1
High	aAAEDVNVTFEDQQk	3	1	1	M0R5N4	N-Term(TMT10); K15(TMT10)	0	0.994227	3	8.55072	1.00761	3	8.30324	1.02301	3	0.58988	1.04705	3	0.418914	0.980236	3	2.45604	1.04923	3	2.56233	0.964421	3	0.363954	0.992966	3	10.0273	0.98191	3	1.99806	0	1.585e-13	128.42	3.66894e-12	2	2123.11	2.03834	68.9505	0
High	dLDQASLAAVSQQLAPR	3	2	1	G3V852	N-Term(TMT10)	0	1.00482	3	7.36397	1.06506	3	5.5116	0.985525	3	0.890673	0.966049	3	4.12972	0.994247	3	11.8511	1.01706	3	1.67478	1.01672	3	4.87614	0.99924	3	5.04935	0.986255	3	6.5804	0	6.391e-15	128.36	4.09197e-12	2	2012.1	1.44928	86.0678	0
High	vAGPQPAQTGVAQASLGEYLFER	2	4	1	P02793	N-Term(TMT10)	0	0.465663	2	51.8164	0.417552	2	54.9387	1.10536	2	12.8679	1.15973	2	10.4594	1.16872	2	8.75401	1.22106	2	6.79457	1.26302	2	3.49557	1.25156	2	2.75832	0.481655	2	65.0155	0	1.642e-17	127.9	4.1194e-12	2	2618.38	1.13411	87.6764	0
High	lEGDVLLGDQDVAGk	2	1	1	F1LUD3	N-Term(TMT10); K15(TMT10)	0	1.00326	2	10.2423	1.08425	2	0.887956	0.991154	2	2.83317	1.03845	2	4.40504	0.937666	2	2.76147	1.038	2	1.37473	0.928642	2	0.563016	0.969523	2	1.72272	1.04385	2	3.30543	0	4.774e-13	127.51	5.49999e-12	2	1987.11	1.27412	83.0142	0
High	dLYANNVLSGGTTMYPGIADR	2	4	1	P68035	N-Term(TMT10)	0	1.27705	2	5.60498	1.28408	2	8.19921	0.852918	2	3.68532	0.923804	2	8.32299	0.913156	2	5.27515	0.907704	2	0.287623	0.899404	2	4.37077	0.907741	2	1.98434	1.29147	2	1.62442	0	8.709e-17	127.49	3.24393e-12	2	2457.23	1.02847	85.7742	0
High	eSTGAQVQVAGDMLPNSTER	6	4	1	Q4V8F6	N-Term(TMT10)	0	1.06588	6	5.20068	1.10563	6	5.2953	0.988547	6	5.59153	1.01183	6	1.73184	0.955335	6	4.1627	0.990218	6	2.01492	0.987338	6	4.47632	0.978252	6	5.96445	1.0204	6	8.73897	0	7.182e-16	127.33	2.26535e-12	2	2319.15	1.54013	68.4589	0
High	gGGGPGGGGPGGGGASGGPSQPPGGGGPGIR	6	3	1	M0R961	N-Term(TMT10)	0	1.08211	6	2.41636	1.05207	6	4.2343	0.915562	6	8.80254	0.94738	6	6.30135	1.03539	6	3.5203	0.930772	6	5.80143	1.05204	6	9.89666	1.04943	6	11.9787	1.02611	6	19.9495	0	1.29e-16	126.66	2.62166e-12	3	2556.25	1.36293	49.2566	0
High	dEAAAAAGGDAAAAPGEQAGGAGAEGAEGGESR	3	2	1	F1LMW7	N-Term(TMT10)	0	1.20179	3	39.2052	0.962208	3	0.471293	0.971788	3	19.9047	0.957631	3	0.650693	0.99686	3	6.22071	0.900457	3	2.2379	1.05028	3	1.24543	1.11369	3	6.2023	0.994198	3	24.7194	0	1.013e-17	126.31	6.4318e-13	3	3028.37	0.541124	51.8995	0
High	eAGFQALEEQNQVEPR	1	3	1	D3ZM57	N-Term(TMT10)	0	1.21017	1		1.12418	1		0.956961	1		0.901045	1		0.958104	1		0.968292	1		0.957458	1		0.945411	1		1.13806	1		0	5.271e-15	126.23	3.50201e-12	2	2074.04	0.577715	69.5337	0
High	tSSAEMPTIPLGSAVEAIR	2	3	1	A0A0G2JVH4	N-Term(TMT10)	0	0.890888	2	13.4635	0.923518	2	3.63253	1.07977	2	2.15276	0.896834	2	0.845166	1.13324	2	2.33532	0.940623	2	8.41613	1.17291	2	0.678978	1.10336	2	4.98882	0.842861	2	4.61716	0	1.594e-16	125.93	5.84569e-12	2	2159.16	1.45293	86.8744	0
High	eITGIGPSTTTETETIAk	1	2	1	Q6AY86	N-Term(TMT10); K18(TMT10)	0	1.0564	1		1.0446	1		0.990685	1		1.00384	1		0.933091	1		1.05083	1		0.985486	1		0.944463	1		1.03618	1		0	2.248e-16	125.91	7.96272e-12	2	2307.27	2.20195	73.9667	0
High	aEDIPQMDDAFSQTVk	2	2	1	D4ACN7	N-Term(TMT10); K16(TMT10)	0	1.02137	2	9.16911	1.08674	2	2.10871	0.984803	2	2.59475	1.02811	2	2.24604	0.949322	2	1.89365	1.02577	2	1.52885	0.92713	2	4.85732	0.90687	2	9.89232	1.12901	2	2.28641	0	4.335e-14	125.54	5.08243e-12	2	2253.15	1.23329	83.2739	0
High	aVVVNAAQLASYSQSk	2	2	1	G3V6H5	N-Term(TMT10); K16(TMT10)	0	0.967897	2	8.75866	1.00281	2	5.62117	1.01025	2	2.16456	1.03349	2	0.503335	0.956357	2	4.83005	1.1039	2	8.41692	0.926338	2	0.609405	0.929317	2	1.21035	1.06512	2	1.79361	0	2.943e-14	125.21	9.98811e-12	2	2094.2	1.91647	79.9476	0
High	qTNLENLDQAFSVAER	2	12	1	Q6S3A0	N-Term(TMT10)	0	1.00184	2	5.89046	0.960644	2	2.65803	1.03117	2	4.28246	0.933834	2	1.12857	1.09242	2	5.64264	0.918319	2	3.88879	1.10741	2	3.01216	1.06893	2	3.05197	0.922974	2	7.3708	0	4.843e-14	124.94	6.15604e-12	2	2064.06	1.16465	84.5472	0
High	lEGDVLLGDQDVAAk	3	1	1	F1LUD3	N-Term(TMT10); K15(TMT10)	0	0.984187	3	5.46175	0.994892	3	12.457	0.983097	3	1.55251	1.05164	3	3.26756	1.0176	3	2.81354	1.00576	3	0.00176672	0.96026	3	7.64891	0.959861	3	4.23983	1.02631	3	6.86255	0	2.602e-12	124.87	9.82398e-12	2	2001.13	1.61871	82.8322	0
High	eATEAATVAAAAEAR	3	1	1	Q3MIE4	N-Term(TMT10)	0	0.957517	3	0.557054	0.953319	3	3.26095	1.01452	3	4.01161	0.940825	3	3.02697	1.0108	3	7.10191	1.03097	3	6.86113	1.04401	3	3.42829	1.01183	3	6.06907	0.92656	3	0.188737	0	8.775e-13	124.39	6.78702e-12	2	1660.87	1.67577	62.6761	0
High	yGPVSVADTTGSGAADAk	1	1	1	B5DEN5	N-Term(TMT10); K18(TMT10)	0	0.974027	1		1.00513	1		0.974508	1		0.973298	1		1.10531	1		0.932563	1		1.07258	1		1.04601	1		0.970248	1		0	3.863e-16	124.11	9.47087e-12	2	2125.12	0.990695	64.5195	0
High	sQNVMAAASIANIVk	3	1	1	P28480	N-Term(TMT10); K15(TMT10)	0	0.83597	3	1.4896	0.912939	3	5.42421	1.09038	3	2.38767	0.985251	3	2.64139	1.11503	3	9.61421	0.971483	3	3.88068	1.11076	3	6.53515	1.0592	3	10.318	0.852351	3	4.14906	0	2.667e-13	123.88	1.35056e-11	2	1975.15	1.99065	86.2497	0
High	eAGAGGLAIAVEGPSk	9	1	1	C0JPT7	N-Term(TMT10); K16(TMT10)	0	0.944814	9	9.06851	0.957915	9	8.09941	0.988824	9	4.00842	1.01164	9	2.69441	1.02133	9	5.99387	1.00086	9	6.00886	1.01374	9	7.1126	1.01189	9	5.04072	0.95175	9	8.34242	0	4.901e-13	123.73	1.17137e-11	2	1885.08	1.64125	72.705	0
High	gGVDVSGGVSVPDINLGEGHMNVk	3	2	1	A0A0G2JUA5	N-Term(TMT10); K24(TMT10)	0	1.15077	3	6.93663	1.24501	3	2.85031	0.858695	3	2.34068	0.956632	3	1.85108	0.860982	3	1.18298	1.01344	3	2.5294	0.91955	3	6.30937	0.930595	3	3.01786	1.29327	3	9.0191	0	1.33e-17	123.56	1.36352e-11	2	2795.48	1.49565	82.5869	0
High	gAAQNIIPASTGAAk	6	8	2	P04797;M0R660	N-Term(TMT10); K15(TMT10)	0																												0	5.984e-10	123.51	1.12528e-11	2	1828.07	1.75708	62.0213	0
High	eLHLNDNPLGDEGLk	1	3	1	E2RUH2	N-Term(TMT10); K15(TMT10)	0	1.01171	1		1.03374	1		1.02612	1		1.07478	1		0.90627	1		1.09801	1		0.874109	1		0.911678	1		1.06549	1		0	2.881e-13	123.08	1.68524e-11	2	2122.16	1.52069	77.9816	0
High	lGFGLEDEPLETATk	1	1	1	B5DEH2	N-Term(TMT10); K15(TMT10)	0	0.948346	1		0.907907	1		1.01639	1		1.02911	1		0.959397	1		1.08162	1		1.05352	1		0.989033	1		0.987355	1		0	2.908e-13	122.87	1.74032e-11	2	2078.15	3.12006	87.4036	0
High	eVVENEQTAASELDEGk	4	5	1	D3ZDT1	N-Term(TMT10); K17(TMT10)	0	1.10888	4	8.68753	1.11629	4	12.3045	0.93918	4	1.32858	0.93276	4	5.47479	0.922468	4	6.22866	0.991276	4	4.82251	0.892067	4	7.1334	0.928573	4	14.4857	1.21728	4	7.75529	0	1.876e-15	122.39	1.04395e-11	2	2306.18	1.10025	69.1236	0
High	gSSLQGDLAVSGDIk	9	2	1	A0A0G2JUA5	N-Term(TMT10); K15(TMT10)	0	1.08459	9	12.4754	1.11487	9	14.1701	0.918369	9	6.98759	0.950473	9	3.76315	0.9504	9	8.56918	0.959323	9	2.60824	0.947976	9	7.30566	0.95121	9	11.3692	1.17766	9	14.1678	0	7.306e-13	122.38	1.59555e-11	2	1905.07	2.03902	74.1602	0
High	sVTNEDVTQEQLGGAk	3	2	1	Q68FZ8	N-Term(TMT10); K16(TMT10)	0	0.830113	3	3.90824	0.797131	3	2.96479	1.08408	3	1.11645	1.08157	3	12.6358	1.05943	3	1.0614	1.10967	3	6.55258	1.02235	3	0.713455	1.00435	3	7.65753	0.862247	3	3.06117	0	4.012e-14	122.35	1.83654e-11	2	2134.14	1.45552	60.1595	0
High	vTAQGPGLEPSGNIANk	2	1	1	C0JPT7	N-Term(TMT10); K17(TMT10)	0	0.889513	2	17.5647	0.951254	2	6.16704	1.05452	2	1.06879	1.02263	2	3.41172	1.0827	2	2.76202	1.00154	2	6.83951	1.02058	2	9.49372	0.977595	2	0.819378	0.967857	2	2.21517	0	2.798e-15	122.22	1.96731e-11	2	2111.19	0.765654	64.4847	0
High	eGSYSISVLYGEEEVPR	2	1	1	C0JPT7	N-Term(TMT10)	0	0.9934	2	7.8215	0.932957	2	3.37088	0.98822	2	0.918342	1.04159	2	6.65005	1.00977	2	1.25235	1.07988	2	0.685463	0.953677	2	0.628219	0.973986	2	1.21581	1.01983	2	0.11938	0	1.055e-15	121.83	1.18106e-11	2	2143.08	1.14755	84.0668	0
High	vNVEAPDVNVEGLGGk	4	2	1	A0A0G2JUA5	N-Term(TMT10); K16(TMT10)	0	1.22398	4	1.51507	1.1839	4	7.23287	0.930727	4	3.66192	0.95108	4	4.02721	0.940506	4	2.30811	0.954736	4	3.79144	0.887602	4	1.70872	0.898688	4	1.41125	1.21932	4	5.36796	0	1.855e-13	121.11	2.44343e-11	2	2055.15	1.77897	79.8616	0
High	gLGHQVATDALVAMEk	4	1	1	Q6AYT3	N-Term(TMT10); K16(TMT10)	0	0.94344	4	3.66218	1.00604	4	1.80709	1.00886	4	5.49146	1.03874	4	1.58082	0.962961	4	0.947831	1.07202	4	1.71478	0.931492	4	0.0455125	0.95147	4	3.44802	1.0617	4	4.68029	0	1.333e-14	121.11	2.31177e-11	2	2098.17	0.566543	80.103	0
High	aSAELALGENSEVLk	10	1	1	P00507	N-Term(TMT10); K15(TMT10)	0	0.920727	10	7.91831	0.963884	10	6.77822	1.01311	10	6.76555	1.02342	10	8.57709	0.99919	10	8.15168	1.0226	10	4.91974	0.96671	10	6.28596	0.97392	10	5.16397	0.989537	10	16.9284	0	4.353e-13	121.04	2.41623e-11	2	1989.13	0.958449	77.9533	0
High	gVNQATAAVVASTISGk	1	2	1	G3V8Y8	N-Term(TMT10); K17(TMT10)	0	1.08327	1		1.06742	1		0.911307	1		1.02518	1		0.954091	1		1.01032	1		0.979043	1		0.943608	1		1.12089	1		0	2.579e-15	120.85	2.53662e-11	2	2032.18	1.07639	82.7329	0
High	vAAScGAIQYIPTELDQVR	2	1	1	D3ZAZ0	N-Term(TMT10); C5(Carbamidomethyl)	0	1.07868	2	12.5711	1.00588	2	22.4437	1.05551	2	7.15775	1.02013	2	11.4889	0.893702	2	14.5582	1.04821	2	0.963015	0.912971	2	11.153	0.939272	2	22.3312	1.02911	2	12.8147	0	6.197e-14	120.77	2.33671e-11	2	2320.22	1.74878	86.9958	0
High	tNHIGHTGYLNTVTVSPDGSLcASGGk	4	2	1	P63245	N-Term(TMT10); C22(Carbamidomethyl); K27(TMT10)	0	1.00529	4	8.14855	1.08353	4	4.99795	0.822651	4	5.86776	1.08588	4	3.88957	0.830139	4	3.68398	1.16951	4	6.60515	0.801895	4	7.7873	0.858853	4	7.31039	1.39855	4	5.86335	0	1.836e-17	120.75	1.96886e-11	3	3201.64	1.27958	66.7531	0
High	eAVcIVLSDDTcSDEk	7	1	1	P46462	N-Term(TMT10); C4(Carbamidomethyl); C12(Carbamidomethyl); K16(TMT10)	0	1.10396	7	2.62371	1.10806	7	4.72743	0.956495	7	4.47311	1.01426	7	2.62569	0.881305	7	6.53542	1.02373	7	1.85027	0.884093	7	5.27211	0.91493	7	1.11503	1.17379	7	5.10415	0	2.781e-13	120.61	8.16823e-12	2	2299.12	0.339159	80.1475	0
High	gcITIIGGGDTATccAk	5	1	1	P16617	N-Term(TMT10); C2(Carbamidomethyl); C14(Carbamidomethyl); C15(Carbamidomethyl); K17(TMT10)	0	1.04046	5	1.90298	1.08603	5	2.32138	1.06116	5	2.26398	1.05859	5	3.42004	0.899483	5	12.6558	1.08053	5	2.15464	0.822606	5	5.8794	0.827088	5	7.51422	1.09183	5	14.5506	0	1.12e-14	120.22	1.70634e-11	2	2213.12	1.93293	70.5039	0
High	lDANIPEVAVEGPEGk	3	2	1	A0A0G2JUA5	N-Term(TMT10); K16(TMT10)	0	1.22252	3	3.78837	1.22795	3	2.13101	0.886545	3	2.42613	0.926592	3	0.813641	0.919662	3	0.476692	0.973564	3	0.200872	0.881215	3	3.46121	0.854772	3	5.15293	1.22972	3	1.52284	0	5.038e-12	120.1	3.34215e-11	2	2096.17	1.42378	81.9921	0
High	iIAEGANGPTTPEADk	2	1	1	P10860	N-Term(TMT10); K16(TMT10)	0	0.933044	2	0.93277	0.93614	2	5.25225	0.98185	2	2.7173	0.971716	2	0.65426	1.13206	2	0.174857	0.972283	2	1.51187	1.10472	2	4.2534	1.11213	2	0.792679	0.858001	2	0.0784935	0	3.354e-12	119.79	2.84951e-11	2	2042.12	2.04107	63.3209	0
High	aEAAEQAALAANQESNIAR	2	1	1	Q2PS20	N-Term(TMT10)	0	0.957831	2	4.62772	0.980013	2	5.48883	0.989259	2	3.20275	0.99908	2	3.73032	1.02266	2	1.67176	1.00429	2	6.97873	1.01704	2	6.02386	1.05536	2	11.6081	0.987044	2	4.71793	0	2.352e-15	119.77	1.87154e-11	2	2157.11	0.710405	69.5262	0
High	eAGAGGLSIAVEGPSk	7	4	2	A0A0H2UHR7;D4A8D5	N-Term(TMT10); K16(TMT10)	0																												0	1.909e-13	119.48	3.61267e-11	2	1901.08	2.1217	70.863	0
High	tELEDTLDSTAAQQELR	4	2	1	G3V6P7	N-Term(TMT10)	0	0.983734	4	4.83209	0.92623	4	10.0736	1.01892	4	3.17869	0.993324	4	2.26787	1.06958	4	1.58951	0.997953	4	2.21953	1.04897	4	10.9522	1.04356	4	5.93185	0.906393	4	13.6128	0	8.783e-15	119.38	1.67251e-11	2	2149.08	0.931938	78.9347	0
High	sAAQAAAQTNSNAAGk	2	1	1	Q6AXS5	N-Term(TMT10); K16(TMT10)	0	0.870458	2	7.39067	0.901811	2	14.8673	1.04295	2	8.83268	1.05672	2	5.85505	1.18571	2	3.21926	0.866143	2	4.16666	1.16617	2	7.15546	0.968705	2	1.52897	0.915815	2	14.7171	0	5.602e-13	119.35	3.57145e-11	2	1919.04	1.63837	44.6314	0
High	nQLTSNPENTVFDAk	4	1	1	P06761	N-Term(TMT10); K15(TMT10)	0	0.956639	4	1.86404	0.931313	4	1.76429	1.01582	4	1.14396	0.998232	4	3.5559	1.12195	4	3.62752	0.958164	4	2.54728	1.12848	4	1.3481	1.04652	4	3.58955	0.838761	4	3.5233	0	2.019e-13	119.02	3.12659e-11	2	2136.14	0.93837	73.2439	0
High	sGVSTATAITDIPSGNLAGSGEAGk	2	2	1	G3V940	N-Term(TMT10); K25(TMT10)	0	0.913997	2	2.32413	0.877537	2	0.393786	1.00172	2	4.25104	0.993633	2	2.0167	1.00854	2	1.4846	1.00525	2	5.27786	1.12874	2	1.50587	1.10914	2	5.57318	0.942733	2	6.49603	0	1.639e-18	118.73	3.37599e-11	2	2719.45	1.04727	78.251	0
High	vINEPTAAALAYGLDk	2	2	1	F1M953	N-Term(TMT10); K16(TMT10)	0	0.62927	2	4.63777	0.673535	2	6.19468	1.12454	2	3.5134	1.22511	2	2.42387	1.06544	2	2.249	1.19601	2	5.52079	1.01011	2	7.69356	1.05347	2	2.85886	0.745468	2	4.9613	0	9.531e-14	118.71	4.15198e-11	2	2104.21	1.44396	87.812	0
High	aAQLcGAGMAAVVEk	2	2	2	P05708;M0RAQ6	N-Term(TMT10); C5(Carbamidomethyl); K15(TMT10)	0																												0	2.093e-13	118.61	4.11097e-11	2	1934.06	1.71091	76.1044	0
High	gLVEPVDVVDNADGTQTVNYVPSR	4	1	1	C0JPT7	N-Term(TMT10)	0	1.02174	4	2.79036	1.00429	4	7.22668	0.969825	4	8.11793	1.01101	4	3.82181	0.957035	4	1.28484	1.07525	4	1.0863	0.941918	4	6.30297	0.994082	4	8.2821	1.09551	4	11.2811	0	6.276e-17	118.43	3.56719e-11	2	2773.43	1.67925	84.0072	0
High	tFTTQETITNAETAk	4	1	1	Q6P6V0	N-Term(TMT10); K15(TMT10)	0	0.941926	4	1.92454	0.904967	4	0.603637	1.01871	4	0.291173	1.00122	4	4.73284	1.07408	4	2.84649	0.966622	4	1.94257	1.09042	4	5.7906	1.10218	4	2.38062	0.876895	4	11.8924	0	1.22e-13	118.28	3.90801e-11	2	2114.14	0.825337	69.566	0
High	aLcVSESQSAGAGTGNAATQGk	1	2	1	F1LPQ9	N-Term(TMT10); C3(Carbamidomethyl); K22(TMT10)	0	1.1352	1		1.21066	1		0.867054	1		0.900711	1		0.949322	1		0.910638	1		0.943631	1		0.950143	1		1.36903	1		0	2.352e-14	118.21	3.39768e-11	3	2523.29	2.18071	57.8459	0
High	dAGEGGLSLAVEGPSk	5	2	1	A0A0H2UHR7	N-Term(TMT10); K16(TMT10)	0	1.05673	5	7.40806	1.09519	5	6.32546	0.93095	5	6.38797	0.992075	5	1.8254	0.981816	5	4.53877	0.979552	5	1.97538	0.966199	5	2.48851	0.955914	5	5.62284	1.10439	5	3.63299	0	1.44e-13	118.2	4.3969e-11	2	1945.07	1.65402	72.4141	0
High	vPDVDVSVAGPDAALk	4	2	1	A0A0G2JUA5	N-Term(TMT10); K16(TMT10)	0	1.10922	4	2.9538	1.11907	4	2.00251	0.936064	4	2.60542	0.948799	4	2.75024	0.878585	4	2.86985	0.966486	4	2.588	0.943679	4	1.66277	0.933276	4	6.72426	1.25188	4	3.45018	0	1.172e-11	118.08	5.40698e-11	2	2011.15	1.98077	83.0234	0
High	vLPMNTGVEAGETAck	4	1	1	P04182	N-Term(TMT10); C15(Carbamidomethyl); K16(TMT10)	0	1.00253	4	7.65092	0.978305	4	5.62308	0.997482	4	5.3228	1.0738	4	2.2062	0.95255	4	2.14363	1.04577	4	4.95618	0.946196	4	4.64816	0.94963	4	2.34314	1.06231	4	7.96885	0	3.469e-14	118.06	3.55616e-11	2	2135.13	0.635363	72.2289	0
High	yHVPVVVVPEGSASDTQEQAILR	3	2	1	A0A0G2K757	N-Term(TMT10)	0	0.947472	3	3.12774	0.924383	3	2.79801	0.956865	3	5.35053	0.987477	3	3.25705	1.05353	3	1.72767	1.04032	3	0.028779	1.08661	3	5.01234	1.03186	3	2.55706	0.918875	3	2.66552	0	3.515e-14	117.9	4.88976e-11	2	2723.46	-0.385281	78.627	0
High	cIGAIAMTEPGAGSDLQGVR	2	1	1	P15650	N-Term(TMT10); C1(Carbamidomethyl)	0	0.95765	2	3.56095	0.845326	2	10.1737	1.02753	2	0.853979	0.919943	2	4.77504	1.1439	2	2.86522	0.926892	2	0.974441	1.22451	2	7.06236	1.12544	2	4.1782	0.822948	2	1.91798	0	7.505e-16	117.89	2.82033e-11	2	2232.13	1.36272	79.2576	0
High	eAALVDMVNDGVEDLR	2	1	1	P04906	N-Term(TMT10)	0	0.584478	2	5.11572	0.62426	2	5.4415	1.17514	2	5.70527	1.25286	2	5.0062	1.04463	2	2.76049	1.25212	2	3.10415	1.03747	2	2.44734	1.03325	2	10.0004	0.649979	2	7.59855	0	1.008e-11	117.81	3.34466e-11	2	1975	1.38639	86.4409	0
High	lDISAPDLNLEGPEGk	3	3	2	A0A0G2JUA5;Q38PG1	N-Term(TMT10); K16(TMT10)	0																												0	1.979e-13	117.37	5.95502e-11	2	2126.18	1.37455	86.9355	0
High	qAYEEEYGSNLEDDVVGDTSGYYQR	2	3	1	P14668	N-Term(TMT10)	0	1.08324	2	0.341928	1.07524	2	1.62076	0.910551	2	0.876149	0.978556	2	0.246319	0.942994	2	8.52442	1.07925	2	0.383275	0.97511	2	0.411046	0.92952	2	0.383465	1.11079	2	7.37097	0	2.817e-15	117.3	3.63107e-12	3	3116.39	1.76817	83.9751	0
High	tEAAEIVEGEDSAYSVR	3	2	1	A0A0H2UHR7	N-Term(TMT10)	0	0.900553	3	2.72059	0.924504	3	8.77173	0.953911	3	6.84652	0.963178	3	4.41613	1.15548	3	2.59325	0.879172	3	6.34349	1.17522	3	9.82564	1.06703	3	3.56332	0.887238	3	3.689	0	7.796e-15	117.01	2.38881e-11	2	2055.01	1.21768	73.1264	0
High	dLYANTVLSGGTTMYPGIADR	12	5	1	P60711	N-Term(TMT10)	0	1.04321	12	6.85485	1.0794	12	6.46949	0.931093	12	3.7323	1.01886	12	3.21887	0.964808	12	3.35943	1.03149	12	6.916	0.963637	12	5.21136	0.980831	12	4.97185	1.03744	12	6.69515	0	3.9e-15	116.97	3.48578e-11	2	2444.24	1.88735	87.5382	0
High	lLDAQLSTGGIVDPSk	3	13	1	Q6S3A0	N-Term(TMT10); K16(TMT10)	0	1.066	3	1.52189	1.0445	3	3.54758	0.995123	3	6.46357	1.01586	3	4.19641	0.898398	3	1.06272	1.05289	3	3.96014	0.97002	3	1.29819	0.883181	3	3.63704	1.09454	3	0.105872	0	3.359e-13	116.94	5.7656e-11	2	2072.2	0.736702	85.2333	0
High	eTTDTDTADQVIASFk	4	3	1	Q9QXQ0	N-Term(TMT10); K16(TMT10)	0	1.0504	4	2.68936	1.05234	4	4.24791	0.922017	4	1.58496	1.00664	4	2.04688	1.00248	4	1.20284	1.02502	4	3.01016	0.955974	4	2.09056	0.944256	4	1.13162	1.07409	4	0.462905	0	5.49e-14	116.87	3.81368e-11	2	2200.14	0.273826	87.1991	0
High	qAFTDVATGSLGQGLGAAcGMAYTGk	1	2	1	P50137	N-Term(TMT10); C19(Carbamidomethyl); K26(TMT10)	0	0.75199	1		0.770965	1		1.12264	1		1.15565	1		1.00983	1		1.18104	1		0.980818	1		1.00042	1		0.828748	1		0	1.079e-14	116.67	4.65001e-11	3	2990.52	2.23253	87.7012	0
High	iLDSVGIEADDER	7	2	1	D4A4D5	N-Term(TMT10)	0	1.00249	7	6.51394	0.96734	7	3.25266	1.00919	7	6.75778	1.00935	7	5.90578	1.00131	7	12.6617	1.00532	7	5.65756	1.02452	7	4.08284	0.953429	7	7.34806	0.935699	7	7.7576	0	3.065e-10	116.61	3.37232e-11	2	1660.86	1.60802	79.6283	0
High	gGHVNLTMLGAMQVSk	1	1	1	B2GV06	N-Term(TMT10); K16(TMT10)	0	0.999994	1		0.995535	1		0.939722	1		1.06106	1		0.933438	1		1.08672	1		0.931764	1		1.01429	1		1.05736	1		0	5.066e-14	116.02	7.55104e-11	2	2101.17	1.85531	77.8326	0
High	vIISAPSADAPMFVMGVNHEk	7	5	2	P04797;M0R660	N-Term(TMT10); K21(TMT10)	0																												0	5.125e-13	115.98	8.81957e-11	2	2671.44	0.927006	86.1003	0
High	vVYGGGAAEIScALAVSQEADk	2	1	1	Q68FQ0	N-Term(TMT10); C12(Carbamidomethyl); K22(TMT10)	0	0.969899	2	3.10902	0.957247	2	4.0786	1.00143	2	4.13629	1.05118	2	1.43792	0.947355	2	12.5798	1.11596	2	4.95023	0.919085	2	3.92968	0.984992	2	3.39408	1.02843	2	3.29898	0	1.042e-17	115.93	6.50939e-11	2	2653.4	2.14166	87.7971	0
High	gYAYVEFENPDEAEk	2	1	1	Q6AYK1	N-Term(TMT10); K15(TMT10)	0	1.14964	2	5.03558	1.18373	2	0.573478	0.880627	2	1.19198	0.956243	2	6.20573	0.906231	2	0.232205	1.01908	2	0.492419	0.932195	2	1.77595	0.936721	2	6.18957	1.19401	2	3.6925	0	1.912e-13	115.84	2.94495e-11	2	2219.09	1.18884	77.8194	0
High	sPASDTYIVFGEAk	3	2	1	M0R9L0	N-Term(TMT10); K14(TMT10)	0	1.1027	3	2.76147	1.14718	3	5.97233	0.910899	3	1.96898	1.02243	3	0.499694	0.894123	3	7.94227	1.07382	3	2.93076	0.88635	3	0.747626	0.901343	3	1.03393	1.18961	3	8.01459	0	4.011e-12	115.83	6.50428e-11	2	1943.06	1.43703	81.19	0
High	kDLYANTVLSGGTTMYPGIADR	8	5	1	P60711	N-Term(TMT10); K1(TMT10)	0	1.1319	8	7.05021	1.08724	8	6.22354	0.938522	8	2.53079	1.063	8	2.07733	0.882724	8	7.30207	1.0587	8	6.98335	0.866675	8	6.83981	0.900766	8	10.7084	1.1833	8	9.43268	0	4.206e-17	115.79	7.65854e-11	2	2801.5	2.1376	83.2698	1
High	cEDMSVNQDLADTDAR	6	1	1	P07150	N-Term(TMT10); C1(Carbamidomethyl)	0	1.06873	6	3.30793	0.995603	6	2.30331	1.00175	6	2.69595	0.916073	6	5.59111	1.13568	6	10.3243	0.867787	6	8.77707	1.1295	6	6.67051	1.08188	6	3.71765	0.925244	6	15.6637	0	1.359e-13	115.75	2.65442e-12	2	2068.91	1.42922	61.5039	0
High	dNHLLGTFDLTGIPPAPR	4	1	1	P06761	N-Term(TMT10)	0	0.95864	4	5.25705	0.996976	4	6.71485	1.00101	4	7.74601	1.03249	4	0.139393	1.06586	4	1.45434	1.01435	4	1.29386	0.944679	4	2.40812	0.974424	4	2.93692	1.01303	4	0.96674	0	5.927e-14	115.71	8.83478e-11	2	2163.18	0.794513	85.8098	0
High	gLSPAQADSQFLENAk	4	5	1	D3ZDT1	N-Term(TMT10); K16(TMT10)	0	1.15781	4	5.06394	1.20482	4	10.8193	0.927056	4	2.8396	0.982639	4	3.18306	0.94235	4	3.63661	0.959403	4	3.06698	0.886352	4	7.50882	0.873431	4	2.70236	1.22736	4	11.4997	0	4.369e-14	115.49	8.72888e-11	2	2134.16	1.85533	79.8102	0
High	aIGSASEGAQSSLQEVYHk	2	2	1	P34064	N-Term(TMT10); K19(TMT10)	0	1.04955	2	1.30005	1.07552	2	0.167447	0.926568	2	1.00426	1.04421	2	3.90353	0.881328	2	5.40826	1.08038	2	0.95941	0.833027	2	2.28852	0.916181	2	2.89988	1.28136	2	0.564387	0	3.942e-15	115.26	7.84839e-11	3	2420.29	2.93167	67.9432	0
High	eAALVDmVNDGVEDLR	3	1	1	P04906	N-Term(TMT10); M7(Oxidation)	0	0.706856	3	9.00656	0.687138	3	17.6242	1.07539	3	2.95234	1.07377	3	1.81144	1.16514	3	1.3184	1.06234	3	1.77738	1.16285	3	7.10597	1.15964	3	2.92497	0.645598	3	4.94333	0	2.108e-11	114.94	4.39259e-11	2	1991	1.72205	83.3979	0
High	eGRPSGEAFVELESEDEVk	3	4	1	A0A0G2JTG7	N-Term(TMT10); K19(TMT10)	0	1.23272	3	3.92655	1.31445	3	1.61801	0.944732	3	0.943158	0.940122	3	0.74388	0.866086	3	3.38731	0.963536	3	2.71507	0.864711	3	10.9977	0.850048	3	2.33064	1.18971	3	8.57878	0	7.285e-15	114.87	5.96281e-11	2	2565.31	1.07651	73.0768	0
High	aGTGVDNVDLEAATR	2	1	1	O08651	N-Term(TMT10)	0	0.725363	2	11.602	0.715772	2	5.60152	1.08727	2	3.11234	1.12216	2	4.77314	1.12164	2	1.92779	1.11213	2	1.30997	1.06771	2	0.924336	1.12684	2	1.14732	0.720686	2	8.45505	0	1.136e-12	114.69	5.9774e-11	2	1717.89	1.42116	62.0627	0
High	gVEINAEAGNMEATcR	2	1	1	F1LYS7	N-Term(TMT10); C15(Carbamidomethyl)	0	1.14654	2	1.88795	1.22571	2	4.89703	0.930404	2	1.61546	0.962785	2	0.481781	0.912531	2	2.78015	0.931478	2	1.83953	0.93538	2	0.872503	0.911844	2	2.32888	1.22162	2	7.44769	0	1.845e-14	114.67	1.82538e-11	2	1950.92	0.319453	64.2154	0
High	dTcIMISGESGAGk	3	1	1	Q63357	N-Term(TMT10); C3(Carbamidomethyl); K14(TMT10)	0	1.13306	3	0.656301	1.10864	3	10.1392	0.983135	3	0.844042	0.978686	3	3.9478	0.97281	3	2.58495	0.978139	3	2.09757	1.02043	3	4.09825	0.98769	3	6.23008	1.08314	3	9.68538	0	2.888e-12	114.52	6.21602e-11	2	1883.96	1.85338	66.9038	0
High	gAEAANVTGPDGVPVEGSR	1	4	1	D4A0L4	N-Term(TMT10)	0	0.982792	1		0.96345	1		0.999653	1		1.06449	1		0.970949	1		1.03827	1		1.00172	1		0.995087	1		0.978094	1		0	2.32e-14	114.48	6.29136e-11	2	2012.03	0.840688	57.3911	0
High	gVVPLAGTNGETTTQGLDGLSER	5	1	1	P05065	N-Term(TMT10)	0	0.814185	5	3.42391	0.828664	5	4.82689	0.999012	5	8.38457	1.00759	5	2.42191	1.14352	5	6.22306	1.06285	5	2.53085	1.12174	5	13.4302	1.13257	5	2.12531	0.809986	5	10.9619	0	2.957e-16	114.17	9.32178e-11	2	2501.31	0.739927	79.7854	0
High	lDVNAPDIDIHGPEGk	10	3	2	A0A0G2JUA5;Q38PF9	N-Term(TMT10); K16(TMT10)	0																												0	1.152e-12	114.05	1.19246e-10	2	2148.17	1.25868	76.7659	0
High	wQSEEAEAEAEEAPR	2	1	1	F1LR10	N-Term(TMT10)	0	1.31349	2	4.26098	1.29466	2	5.5358	0.909087	2	5.0312	0.933111	2	0.0737329	0.883982	2	1.37175	0.927754	2	4.24574	0.893119	2	0.00733802	0.829332	2	0.280957	1.25788	2	1.11204	0	2.416e-13	113.97	1.44312e-11	2	1960.91	1.3408	66.3907	0
High	gQFSTDELVAEVEk	3	2	1	F1M779	N-Term(TMT10); K14(TMT10)	0	1.00834	3	2.74336	1.02853	3	0.937913	0.970566	3	0.949673	1.03849	3	7.58947	0.966055	3	1.48518	1.01742	3	2.97394	0.945503	3	1.31474	0.956317	3	0.404326	1.07473	3	6.75378	0	7.155e-12	113.77	1.12076e-10	2	2010.08	2.36949	86.329	0
High	lQVEPAVDTSGVQcYGPGIEGQGVFR	2	1	1	C0JPT7	N-Term(TMT10); C14(Carbamidomethyl)	0	0.969618	2	9.21131	0.99063	2	0.0593289	1.00086	2	5.82863	1.05802	2	1.83285	0.927449	2	13.2548	1.09496	2	8.32137	0.940605	2	0.131701	0.990477	2	8.62189	1.0042	2	3.11608	0	4.732e-15	113.77	8.10135e-11	3	2992.51	1.31871	86.4762	0
High	sPAAPAPSLPPAAAVLPSk	6	5	1	F1LQN3	N-Term(TMT10); K19(TMT10)	0	1.03728	6	7.75638	1.02253	6	6.30387	0.956169	6	5.40636	0.97137	6	2.2452	0.978537	6	1.57689	1.00938	6	2.21178	1.01768	6	4.63596	0.983553	6	2.89408	1.08957	6	2.13173	0	6.661e-13	113.64	9.38555e-11	2	2200.31	1.07738	81.6359	0
High	lAETQEEISAEVAAk	2	1	1	B2RYP6	N-Term(TMT10); K15(TMT10)	0	1.18397	2	4.63835	1.21777	2	4.85494	0.905789	2	1.32238	0.988497	2	1.17618	0.938698	2	0.056468	0.954932	2	0.564004	0.8838	2	5.3752	0.917094	2	6.51226	1.18114	2	0.732147	0	2.185e-13	113.6	1.24844e-10	2	2047.14	1.41476	83.0374	0
High	ekEEFAVPENSSVQQFk	3	2	1	A0A140TAI1	N-Term(TMT10); K2(TMT10); K17(TMT10)	0	0.885505	3	3.33318	0.931851	3	6.12801	0.99319	3	1.70128	1.09562	3	2.35277	1.03595	3	1.75263	1.07033	3	1.07459	0.980915	3	5.16535	1.04662	3	0.195787	0.957764	3	3.43332	0	2.738e-12	113.6	1.29645e-10	2	2683.46	1.88827	72.3546	1
High	qSGEAFVELESEDDVk	3	1	1	Q794E4	N-Term(TMT10); K16(TMT10)	0	0.993024	3	2.28206	0.992092	3	1.23541	1.02164	3	1.12495	0.994522	3	4.75777	1.02908	3	1.83482	1.04613	3	3.64508	1.01254	3	8.21627	1.00336	3	0.886991	0.939658	3	6.25431	0	2.136e-14	113.55	7.63917e-11	2	2240.14	0.679452	80.7974	0
High	fSVcVLGDQQHcDEAk	8	3	1	P62907	N-Term(TMT10); C4(Carbamidomethyl); C12(Carbamidomethyl); K16(TMT10)	0	1.01673	8	1.93433	1.01599	8	6.35527	0.998244	8	5.26772	1.07032	8	2.3567	0.953341	8	8.15594	1.05666	8	2.62198	0.933834	8	3.77221	0.933178	8	5.67533	1.0474	8	3.08769	0	2.47e-14	113.43	5.26572e-11	2	2351.15	0.990771	70.1108	0
High	aSGEMASAQYITAALR	2	2	1	A0A0G2JVV5	N-Term(TMT10)	0	0.881852	2	12.2721	0.931517	2	6.5721	1.02231	2	0.396039	1.0594	2	1.1396	1.05195	2	7.58729	1.07248	2	8.55047	0.983024	2	9.9635	0.985606	2	9.87323	0.952494	2	1.54616	0	4.489e-14	112.9	1.08214e-10	2	1868.98	2.06821	84.6954	0
High	qGGLGPMNIPLVSDPk	4	2	1	A0A0G2K3Z9	N-Term(TMT10); K16(TMT10)	0	0.90875	4	11.1174	0.912672	4	4.72934	1.03947	4	4.01385	0.999552	4	0.45068	1.06526	4	4.2347	1.00726	4	2.11485	1.07466	4	7.37823	1.05892	4	3.98014	0.899006	4	12.6732	0	1.126e-13	112.67	1.7223e-10	2	2081.18	0.535431	87.2157	0
High	sITIANQTNcPLYVTk	5	1	1	P47942	N-Term(TMT10); C10(Carbamidomethyl); K16(TMT10)	0	1.13269	5	12.0317	1.17929	5	4.85019	0.927858	5	2.32379	0.955631	5	0.596237	0.933249	5	3.47125	0.978875	5	2.82167	0.917548	5	9.32153	0.962272	5	2.87184	1.18067	5	4.19492	0	1.151e-14	112.63	1.76007e-10	2	2281.26	0.918705	78.8925	0
High	gFNEGLWEIENNPGVk	2	1	1	Q923W4	N-Term(TMT10); K16(TMT10)	0	0.915971	2	4.17067	0.969474	2	3.09293	0.978476	2	3.34576	1.06628	2	0.828866	0.977961	2	4.00813	1.08458	2	4.29973	1.00022	2	1.54047	1.00274	2	4.67908	0.977399	2	2.97241	0	2.434e-14	112.54	1.28431e-10	2	2261.2	1.11492	86.7256	0
High	tHINIVVIGHVDSGk	2	3	1	M0R757	N-Term(TMT10); K15(TMT10)	0	0.853166	2	2.62668	0.87971	2	3.54304	0.891037	2	0.143552	1.35771	2	0.0901207	0.752812	2	0.801654	1.32804	2	1.08408	0.833796	2	1.22515	0.806738	2	0.48546	1.16995	2	2.30197	0	6.081e-13	112.05	1.80259e-10	2	2047.21	1.11983	67.61	0
High	wTNQLNSLNQAVVSk	2	1	1	P61203	N-Term(TMT10); K15(TMT10)	0	0.935714	2	7.99646	0.851361	2	3.58741	1.07586	2	0.291268	1.00513	2	2.46315	1.03186	2	3.36533	0.990557	2	0.568114	1.10307	2	1.67915	1.08646	2	0.447726	0.872111	2	5.58867	0	1.582e-13	111.99	2.0585e-10	2	2160.22	0.920675	85.5535	0
High	dDEVDVDGTVEEDLGk	7	1	1	Q7M079	N-Term(TMT10); K16(TMT10)	0	1.13241	7	3.97916	1.12327	7	4.2807	0.976992	7	2.32089	0.982735	7	2.19687	0.92924	7	4.31769	1.00658	7	3.5444	0.929982	7	3.48587	0.930422	7	5.87357	1.09034	7	1.57239	0	2.487e-13	111.97	8.67227e-11	2	2193.08	0.745968	81.3322	0
High	qAGASVLPVETEAQENVVAQk	4	2	1	D3ZDT1	N-Term(TMT10); K21(TMT10)	0	1.08686	4	1.88169	1.10333	4	6.42152	0.935952	4	1.06758	0.981439	4	3.30799	0.983005	4	1.60042	0.952741	4	5.74103	0.95308	4	1.77283	0.939869	4	1.04609	1.11928	4	2.16271	0	1.558e-17	111.89	2.15822e-10	2	2626.45	1.59348	76.3079	0
High	gLYDGPVcEVSVTPk	4	1	1	P47942	N-Term(TMT10); C8(Carbamidomethyl); K15(TMT10)	0	1.2051	4	4.22007	1.17644	4	12.3003	0.903999	4	8.73156	0.977104	4	1.58502	0.886756	4	7.9952	1.00051	4	0.995505	0.895894	4	10.3878	0.918168	4	10.9231	1.2409	4	15.4996	0	4.19e-12	111.86	1.96466e-10	2	2079.12	1.74079	77.5765	0
High	tcTTVAFTQVNSEDk	5	9	1	F1M013	N-Term(TMT10); C2(Carbamidomethyl); K15(TMT10)	0	0.947252	5	3.35	0.941715	5	2.34265	1.0537	5	2.53028	0.994564	5	0.670635	1.07409	5	1.24653	0.966367	5	3.90269	1.09348	5	7.18614	1.00792	5	0.583227	0.910153	5	2.95423	0	4.359e-13	111.67	1.30027e-10	2	2159.11	0.790157	65.5263	0
High	sSLSSAQADFNQLAELDR	2	7	1	Q6IRK8	N-Term(TMT10)	0	1.00496	2	1.21659	1.00247	2	12.5839	1.03085	2	1.95272	0.965801	2	2.34249	1.03719	2	8.32982	0.940353	2	1.33631	1.10551	2	7.06181	1.06524	2	2.82317	0.866591	2	9.1898	0	1.275e-14	111.62	1.44617e-10	2	2181.1	2.27863	87.8524	0
High	gSTAPVGGGSFPNITPR	3	2	1	Q63081	N-Term(TMT10)	0	1.20902	3	20.6818	1.24711	3	8.05164	0.867377	3	2.99929	0.900235	3	2.27745	0.951144	3	4.89168	0.998104	3	0.961381	0.970941	3	8.35375	0.916254	3	9.29351	1.22304	3	6.70829	0	2.649e-12	111.51	1.78345e-10	2	1843.99	1.40889	68.2953	0
High	aTcIGNNSAAAVSMLk	3	1	1	P21670	N-Term(TMT10); C3(Carbamidomethyl); K16(TMT10)	0	0.983042	3	2.57445	1.02493	3	3.0685	0.973673	3	1.81657	1.00259	3	0.298723	0.996822	3	0.40737	1.03013	3	3.98986	0.954298	3	1.99959	0.959823	3	0.165778	1.04599	3	5.55728	0	2.546e-14	111.39	1.94233e-10	2	2066.12	1.477	76.7478	0
High	aGVGAPVTQVTLQSTQR	4	12	1	Q6S3A0	N-Term(TMT10)	0	0.997913	4	7.79026	1.01068	4	3.69259	0.95739	4	0.875361	0.983888	4	2.95801	1.00872	4	1.93223	0.990546	4	2.90602	1.05145	4	2.86775	1.01281	4	2.07818	0.995428	4	6.52961	0	1.508e-14	111.32	2.17313e-10	2	1942.09	1.49989	66.2831	0
High	nTVANSPQTLLAGMNk	2	1	1	D3ZD23	N-Term(TMT10); K16(TMT10)	0	0.880641	2	6.28161	0.883885	2	3.00427	1.04295	2	0.264828	0.978826	2	1.88049	1.12317	2	1.10053	0.97085	2	2.29755	1.12706	2	1.2123	1.08885	2	4.03684	0.871412	2	2.96714	0	6.616e-14	111.32	2.30964e-10	2	2117.18	1.51201	82.0164	0
High	gQAPVIDGELYNEVk	3	2	1	Q63525	N-Term(TMT10); K15(TMT10)	0	0.924774	3	0.912205	0.923269	3	0.327041	1.01963	3	0.999071	1.05064	3	0.516863	1.02078	3	4.35564	1.06172	3	0.381857	0.947815	3	0.766808	1.01603	3	3.36843	1.01966	3	4.24354	0	2.338e-13	111.21	2.11535e-10	2	2090.16	0.887846	79.4164	0
High	lEGALGADTTEDGDEk	3	2	1	D4ACN7	N-Term(TMT10); K16(TMT10)	0	1.02526	3	1.67335	1.0433	3	2.63087	1.00944	3	1.78778	1.02408	3	2.29267	0.970483	3	1.13867	1.01132	3	2.59367	0.963156	3	3.49736	0.97086	3	4.9211	1.02885	3	0.0185341	0	7.562e-14	111	1.21929e-10	2	2079.05	1.35561	67.6902	0
High	aQQEDALAQQAFEEAR	4	1	1	Q66HA7	N-Term(TMT10)	0	1.02553	4	13.4051	0.970111	4	7.78006	1.01759	4	2.07132	1.00205	4	0.529597	0.974654	4	5.10198	0.981366	4	2.58344	1.02259	4	2.29559	1.03019	4	4.24548	1.01588	4	9.64656	0	5.905e-14	110.93	1.11802e-10	2	2034.01	1.5739	76.3856	0
High	hNDDEQYAWESSAGGSFTVR	7	4	2	P34058;P82995	N-Term(TMT10)	0																												0	1.366e-15	110.93	2.05845e-11	2	2485.12	0.699947	69.7845	0
High	sGSGTMNLGGSLTR	2	2	1	Q5XI32	N-Term(TMT10)	0	0.934313	2	2.82875	0.878251	2	3.04192	1.0896	2	0.888869	0.941939	2	5.30059	1.14476	2	5.55097	0.900091	2	4.89968	1.14733	2	5.62562	1.16837	2	2.42446	0.767363	2	1.2625	0	2.897e-12	110.86	1.4028e-10	2	1566.81	2.13249	63.3929	0
High	aEDEEEINAELTAk	1	10	2	A0A0G2K0F5;G3V6D8	N-Term(TMT10); K14(TMT10)	0																												0	3.362e-12	110.8	1.95464e-10	2	2020.05	1.58025	73.6641	0
High	tGGTYGEDLGADYNLSQVcDGk	5	1	1	P12785	N-Term(TMT10); C19(Carbamidomethyl); K22(TMT10)	0	1.17496	5	2.90969	1.15793	5	1.786	0.935644	5	5.82308	0.955986	5	2.91361	0.931183	5	4.54741	0.954204	5	5.70449	0.984176	5	6.57732	0.936399	5	2.91395	1.14806	5	4.95788	0	1.678e-16	110.78	8.35603e-11	2	2778.34	2.30053	79.7988	0
High	iEDLSQQAQLAAAEk	4	2	1	M0R9L0	N-Term(TMT10); K15(TMT10)	0	1.051	4	8.73292	1.00279	4	6.61175	1.00088	4	5.17165	0.974143	4	1.59685	0.983182	4	1.94453	1.01496	4	3.56316	0.954246	4	0.569118	0.943317	4	2.35461	1.08529	4	5.25818	0	2.035e-12	110.74	2.63542e-10	2	2073.16	1.85621	80.9219	0
High	fAIQDISVEETSAk	5	11	2	Q6GMN8;Q9QXQ0	N-Term(TMT10); K14(TMT10)	0																												0	4.96e-12	110.67	2.81108e-10	2	1996.1	1.35747	84.7897	0
High	qDLPNAMNAAEITDk	6	5	1	A0A0G2JV81	N-Term(TMT10); K15(TMT10)	0	0.955386	6	7.38455	0.978983	6	3.95191	1.01787	6	2.52603	0.988677	6	2.50501	1.05029	6	1.66543	1.02184	6	1.84593	1.02759	6	3.94515	1.03247	6	5.22953	0.951389	6	0.90895	0	7.007e-13	110.57	2.01272e-10	2	2089.1	2.02496	77.5534	0
High	vGTGEPccDWVGDEGAGHFVk	5	1	1	P85968	N-Term(TMT10); C7(Carbamidomethyl); C8(Carbamidomethyl); K21(TMT10)	0	0.875427	5	7.09557	0.864877	5	2.26239	1.06759	5	4.49606	1.10508	5	5.9642	0.995364	5	6.93794	1.0845	5	1.32781	0.967699	5	3.78423	0.98806	5	4.15779	0.931474	5	1.27352	0	2.421e-13	110.53	5.84176e-11	3	2735.3	1.41283	74.6847	0
High	aSVTVGGEQISAIGR	1	2	1	D4A9K3	N-Term(TMT10)	0	0.861626	1		0.874957	1		0.958937	1		1.07575	1		1.04534	1		1.10757	1		1.04431	1		1.05651	1		0.909621	1		0	3.46e-12	110.52	2.54614e-10	2	1673.95	4.05911	69.2947	0
High	aTNVVMNYSEIESk	2	1	1	Q6DGF2	N-Term(TMT10); K14(TMT10)	0	0.927009	2	9.01679	1.00388	2	3.23016	0.983187	2	3.80951	1.02641	2	5.61621	0.967971	2	0.583867	1.08063	2	9.02819	0.957422	2	3.10549	1.01258	2	13.7517	1.03214	2	1.75407	0	1.9e-12	110.51	1.98736e-10	2	2043.09	2.07858	77.0505	0
High	lVSIGAEEIVDGNVk	4	4	1	Q6GMN8	N-Term(TMT10); K15(TMT10)	0	1.0516	4	12.0058	1.03862	4	9.02482	0.917145	4	8.25088	0.971751	4	3.7307	1.01858	4	4.37852	0.953989	4	10.0344	1.01951	4	1.42135	1.00896	4	2.82201	1.06504	4	9.03185	0	7.482e-13	110.39	2.51838e-10	2	2001.17	1.12916	86.4079	0
High	tVGIDDLTGEPLIQR	4	2	1	Q6P2A5	N-Term(TMT10)	0	0.961643	4	9.57147	0.951399	4	2.71432	1.0317	4	3.16735	0.988771	4	0.490851	1.03378	4	11.1337	0.984753	4	4.34685	1.07411	4	3.61136	1.00814	4	1.64421	0.905103	4	14.49	0	4.679e-12	110.36	2.77055e-10	2	1856.04	2.1807	85.1452	0
High	gTILISSEEGETEANNPk	5	3	1	F1LS72	N-Term(TMT10); K18(TMT10)	0	0.921896	5	4.53996	1.01953	5	21.7888	0.999094	5	6.93822	1.03611	5	3.93932	0.989877	5	1.4266	1.03794	5	1.67988	0.951435	5	12.3106	0.964643	5	12.5047	1.07754	5	10.2809	0	6.643e-16	110.33	2.20122e-10	2	2347.24	1.20984	67.2803	0
High	mDIDTPDIDIHGPEGk	7	2	1	A0A0G2JUA5	N-Term(TMT10); K16(TMT10)	0	1.17482	7	3.43602	1.20645	7	3.58419	0.93335	7	2.02519	0.980196	7	4.88241	0.911963	7	5.60294	0.981613	7	3.04054	0.885342	7	1.58794	0.873501	7	5.48168	1.24765	7	4.2336	0	3.941e-13	110.11	1.81348e-10	2	2211.14	1.28474	77.1233	0
High	lIAPVADDETAVPNNk	1	1	1	P42123	N-Term(TMT10); K16(TMT10)	0	1.15444	1		1.18741	1		0.9386	1		0.94326	1		0.939832	1		0.967478	1		0.935768	1		0.906067	1		1.19099	1		0	8.401e-13	110.02	2.91156e-10	2	2125.19	2.01229	74.2842	0
High	nPGNQAAYEHFETMk	4	3	1	P85972	N-Term(TMT10); K15(TMT10)	0	1.12637	4	2.35379	1.12779	4	2.03805	0.929158	4	3.05552	0.917293	4	1.1086	1.00397	4	3.10081	0.92125	4	1.0391	0.990811	4	2.8689	0.964575	4	2.08091	1.15226	4	1.99086	0	1.395e-13	109.95	1.54772e-10	2	2195.1	1.16935	66.3244	0
High	aAVEEGIVLGGGcALLR	7	1	1	P63039	N-Term(TMT10); C13(Carbamidomethyl)	0	1.05957	7	11.2245	0.995099	7	12.0006	1.0309	7	3.21512	1.06574	7	4.25684	0.936753	7	6.7078	1.03486	7	2.20428	0.934057	7	9.13226	0.944493	7	9.05174	1.10958	7	7.78418	0	4.406e-14	109.93	2.80993e-10	2	1914.07	1.87849	86.7107	0
High	nVGLDIEAEVPAVk	2	1	1	D4ACB8	N-Term(TMT10); K14(TMT10)	0	0.92355	2	1.43786	0.934974	2	1.57855	1.0496	2	1.47554	1.00945	2	1.15724	1.04296	2	0.657231	0.955347	2	2.49891	1.099	2	6.95338	1.05967	2	1.22161	0.911831	2	2.55257	0	8.346e-12	109.91	2.98114e-10	2	1912.12	1.15587	85.8527	0
High	tGQATVASGIPAGWMGLDcGTESSk	2	1	1	P16617	N-Term(TMT10); C19(Carbamidomethyl); K25(TMT10)	0	0.99097	2	3.37866	1.01539	2	2.66246	1.00565	2	0.600335	1.02364	2	7.9548	0.997507	2	0.535018	1.00897	2	0.188768	0.997596	2	3.51352	1.00725	2	1.21743	0.967808	2	8.40611	0	1.15e-14	109.78	1.71996e-10	3	2939.47	1.41241	86.9345	0
High	nVQAEEMVEFSSGLk	4	3	1	F1LP05	N-Term(TMT10); K15(TMT10)	0	0.979145	4	6.3207	0.997987	4	5.3996	1.00282	4	1.41001	0.971959	4	3.18475	1.05225	4	3.01956	0.97374	4	5.00355	1.08154	4	3.23319	1.03831	4	5.03326	0.940631	4	7.94174	0	4.406e-13	109.75	2.89176e-10	2	2126.12	1.46626	86.6252	0
High	lVSIGAEEIVDGNAk	6	4	1	Q9QXQ0	N-Term(TMT10); K15(TMT10)	0	1.02946	6	6.57234	0.996099	6	4.83787	0.955789	6	4.52675	0.96896	6	2.77568	1.0417	6	4.69933	1.00801	6	3.20834	1.02713	6	3.38464	1.02568	6	2.79398	1.01111	6	6.14889	0	1.138e-12	109.65	3.44147e-10	2	1973.13	1.29428	83.6335	0
High	tLTTVQGIADDYDk	3	2	1	B0K008	N-Term(TMT10); K14(TMT10)	0	1.06247	3	3.7799	1.0322	3	8.98195	0.972485	3	0.271165	0.973569	3	1.6747	0.963966	3	1.43398	1.00546	3	2.30313	0.985825	3	1.7562	1.01327	3	4.37693	1.03874	3	4.56749	0	7.556e-12	109.64	3.21039e-10	2	1998.08	2.51592	80.5911	0
High	vQVQDNEGHSVETTVk	6	1	1	C0JPT7	N-Term(TMT10); K16(TMT10)	0	1.00947	6	8.27317	0.973875	6	5.90418	1.00585	6	2.95173	1.0258	6	7.8561	1.06255	6	3.03731	0.98392	6	2.56711	0.95932	6	4.17907	1.0253	6	7.95503	0.992997	6	4.30213	0	1.645e-14	109.62	3.00692e-10	2	2228.19	0.686635	57.3043	0
High	eMEENFALEAANYQDTIGR	13	2	1	P31000	N-Term(TMT10)	0	1.04295	13	2.03435	1.0457	13	6.02313	0.918128	13	4.89463	0.990247	13	6.7661	0.940239	13	6.64405	1.03879	13	5.15318	0.941068	13	5.4234	0.955336	13	4.73983	1.13233	13	7.38047	0	2.45e-13	109.58	7.6557e-11	2	2430.15	1.81062	87.3859	0
High	gAVVGIDLGTTNScVAVMEGk	1	2	1	F1M953	N-Term(TMT10); C14(Carbamidomethyl); K21(TMT10)	0	0.61285	1		0.609352	1		1.17522	1		1.14605	1		1.05782	1		1.25227	1		1.08483	1		1.13986	1		0.600876	1		0	3.557e-16	109.49	3.13202e-10	2	2536.35	1.04731	87.057	0
High	sEQDQAENEGEDSAVLMER	3	1	1	B5DFC8	N-Term(TMT10)	0	0.975478	3	5.5532	1.02991	3	0.11606	0.97849	3	1.66633	0.982591	3	4.80278	0.950258	3	5.83532	1.07973	3	6.78554	0.976797	3	0.556907	1.01211	3	8.12508	0.957343	3	6.8536	0	1.565e-11	109.46	2.5479e-11	3	2366.07	2.20803	63.6463	0
High	fDTGNLcMVTGGANLGR	4	4	1	X1WI37	N-Term(TMT10); C7(Carbamidomethyl)	0	1.0132	4	5.90874	0.973731	4	10.4563	1.07491	4	3.97479	0.95851	4	8.39887	1.12282	4	4.67537	0.945018	4	4.86648	1.12465	4	6.25438	1.04725	4	3.31739	0.77844	4	5.99832	0	4.178e-14	109.35	1.49246e-10	2	2011.99	0.660448	84.4621	0
High	mDATANDVPSPYEVk	5	2	1	P11598	N-Term(TMT10); K15(TMT10)	0	1.14924	5	6.61344	1.1313	5	6.07281	0.975719	5	1.95975	0.995642	5	4.14069	0.90071	5	3.63732	1.00528	5	3.14906	0.916347	5	0.947498	0.930106	5	3.11467	1.12186	5	8.51364	0	4.183e-11	109.05	2.28368e-10	2	2095.08	0.543178	73.4275	0
High	eLAQQVQQVADDYGk	1	2	2	A0A096MIX2;E9PT29	N-Term(TMT10); K15(TMT10)	0																												0	1.638e-12	109.05	3.2793e-10	2	2150.15	2.05608	84.9671	0
High	eEEAIQLDGLNASQIR	5	3	1	A0A0A0MY09	N-Term(TMT10)	0	1.06891	5	8.36982	1.01504	5	6.80224	0.93688	5	2.73313	0.980973	5	5.79875	0.995419	5	3.22215	0.979076	5	4.54922	0.992411	5	1.83045	1.00035	5	2.41322	1.08929	5	10.0106	0	3.496e-13	109.01	2.81351e-10	2	2015.06	0.890443	79.6696	0
High	vTEEENTSSGADASSASDTTVk	1	2	1	D4A054	N-Term(TMT10); K22(TMT10)	0	1.08777	1		1.07	1		1.01887	1		1.03579	1		0.825928	1		0.967687	1		0.911483	1		0.982386	1		1.18669	1		0	1.731e-13	109	1.39741e-10	3	2644.29	0.785665	54.3387	0
High	icDQWDNLGALTQk	1	3	1	Q6GMN8	N-Term(TMT10); C2(Carbamidomethyl); K14(TMT10)	0	1.06904	1		1.07655	1		1.03852	1		1.11221	1		0.935178	1		1.02539	1		0.889901	1		0.866265	1		1.00467	1		0	1.362e-11	108.98	3.06066e-10	2	2120.13	2.08317	87.3557	0
High	aFVEVNEEGTEAVAATGSTITMR	1	1	1	Q6P9U0	N-Term(TMT10)	0	0.80836	1		0.84983	1		1.01223	1		1.00754	1		1.07415	1		1.12355	1		1.0273	1		1.10381	1		0.910564	1		0	1.759e-16	108.95	2.26047e-10	2	2612.31	2.71849	85.1837	0
High	vAHSDDGVQWTVYEEQGTSk	3	3	1	P70490	N-Term(TMT10); K20(TMT10)	0	1.71558	3	13.3382	1.7702	3	15.6008	0.833447	3	10.1052	0.826407	3	2.71133	0.636469	3	5.1971	0.69365	3	29.9515	0.637163	3	13.712	0.655931	3	17.7369	1.81265	3	15.4607	0	1.431e-15	108.92	2.24408e-10	2	2694.34	0.592254	69.7099	0
High	vFVGGLSPDTSEEQIk	3	2	1	A0A0G2KAZ7	N-Term(TMT10); K16(TMT10)	0	1.04135	3	3.61636	1.01213	3	1.93034	0.961821	3	1.66209	0.989865	3	1.9617	0.959465	3	4.04548	0.965032	3	1.80703	0.981759	3	5.28546	0.962026	3	7.01753	1.13948	3	5.59215	0	1.475e-10	108.91	3.83658e-10	2	2164.19	1.11785	81.926	0
High	sGQSAAGASPAGGIDTR	1	1	1	C0JPT7	N-Term(TMT10)	0	1.14416	1		0.786558	1		1.02448	1		1.03927	1		1.08534	1		0.927839	1		1.03001	1		1.03945	1		0.940492	1		0	1.748e-10	108.46	2.56609e-10	2	1731.89	1.89067	44.3353	0
High	sEIGIAMGSGTAVAk	2	3	1	P11507	N-Term(TMT10); K15(TMT10)	0	0.988944	2	4.88316	0.941732	2	5.33151	0.983249	2	1.29939	1.02229	2	3.12922	1.01347	2	3.18652	1.01318	2	2.13928	1.02239	2	2.3838	1.04294	2	3.71088	0.982658	2	2.39097	0	2.346e-12	108.42	4.30201e-10	2	1850.05	3.48552	72.7261	0
High	eADFQAIDNEVGFTk	2	2	2	O08815;G3V7I8	N-Term(TMT10); K15(TMT10)	0																												0	5.001e-13	108.4	3.27392e-10	2	2142.12	1.52964	85.4318	0
High	eLGSEcGIEFDEEk	3	1	1	Q641Y0	N-Term(TMT10); C6(Carbamidomethyl); K14(TMT10)	0	1.05691	3	4.04163	1.02529	3	1.15721	0.957976	3	0.771368	1.03905	3	3.42002	0.930789	3	2.40619	1.0133	3	0.139839	0.947709	3	1.33306	0.941587	3	1.83792	1.07731	3	2.03606	0	1.512e-12	108.26	1.24648e-10	2	2100.02	0.809151	76.045	0
High	iNEELESQYQQSMDSk	4	1	1	G3V8R0	N-Term(TMT10); K16(TMT10)	0	1.03088	4	1.32053	1.09416	4	11.3901	0.954653	4	3.19948	1.0157	4	2.45982	0.959194	4	4.92504	1.01419	4	1.07433	0.95224	4	4.82186	0.956674	4	4.78688	1.081	4	2.68669	0	3.46e-14	108.19	1.97975e-10	2	2387.18	0.646337	79.4263	0
High	qLETIDQLHLEYAk	4	5	1	Q9QXQ0	N-Term(TMT10); K14(TMT10)	0	0.998987	4	1.43432	1.04064	4	0.931579	0.917549	4	0.389718	1.00523	4	0.278524	0.973287	4	2.16297	1.02237	4	3.63843	0.970879	4	8.81032	0.960466	4	4.00768	1.15798	4	3.47616	0	4.597e-12	108.1	4.86328e-10	2	2159.22	1.89158	80.4488	0
High	iGScTQQDVELHVQk	3	1	1	P15178	N-Term(TMT10); C4(Carbamidomethyl); K15(TMT10)	0	0.949611	3	3.83817	0.942977	3	7.05688	1.02879	3	4.4735	1.06902	3	3.92873	1.0182	3	6.62471	1.04358	3	3.28103	1.01191	3	6.10649	1.01982	3	1.44269	0.948372	3	4.64944	0	1.069e-13	108.05	3.81504e-10	2	2200.18	1.13045	65.6624	0
High	sPFSVGVSPSLDLSk	4	1	1	C0JPT7	N-Term(TMT10); K15(TMT10)	0	1.02107	4	1.88536	1.02361	4	4.37038	0.979983	4	1.71714	1.03518	4	2.84236	0.95219	4	3.32523	1.05453	4	2.37804	0.949898	4	4.80501	0.956951	4	0.498717	1.0637	4	3.8166	0	6.846e-10	108.03	4.90296e-10	2	1978.13	0.65906	87.2041	0
High	tAAANAAAGAAENAFR	1	3	1	E9PTW1	N-Term(TMT10)	0	1.02514	1		0.941727	1		1.02708	1		0.94658	1		1.15139	1		0.801944	1		1.23217	1		1.12457	1		0.800165	1		0	2.205e-13	108.01	2.46675e-10	2	1705.88	1.71875	70.3373	0
High	vQGSDSDEEVVVATTR	3	1	1	Q04462	N-Term(TMT10)	0	0.929828	3	0.273783	0.936692	3	3.07437	1.0342	3	3.17799	1.0062	3	2.36701	1.01336	3	1.8959	1.06714	3	0.059626	0.994186	3	8.55011	1.04636	3	4.48239	0.869618	3	5.40408	0	9.154e-14	107.96	2.22339e-10	2	1920.97	-0.13974	62.2493	0
High	scMLTGTPESVQSAk	2	2	1	Q32PX7	N-Term(TMT10); C2(Carbamidomethyl); K15(TMT10)	0	1.08957	2	6.58649	1.06184	2	8.29932	0.983345	2	5.53478	0.958237	2	0.921978	1.05529	2	2.93383	0.923623	2	1.93598	1.02155	2	2.87182	0.980828	2	5.61778	1.01839	2	4.93074	0	1.274e-10	107.91	3.46269e-10	2	2054.07	2.56637	64.1012	0
High	lGGNcIFAPANVTSEk	2	2	1	B0BMW2	N-Term(TMT10); C5(Carbamidomethyl); K16(TMT10)	0	0.945305	2	1.03505	1.01407	2	0.748917	0.996131	2	0.691598	0.997335	2	3.27088	0.993874	2	0.836982	1.02284	2	6.93847	1.00484	2	2.57913	1.01082	2	5.05779	1.03803	2	3.59434	0	8.37e-14	107.91	4.70861e-10	2	2136.16	2.38232	80.9021	0
High	gPAVGIDLGTTYScVGVFQHGk	5	5	1	P63018	N-Term(TMT10); C14(Carbamidomethyl); K22(TMT10)	0	1.12077	5	2.49746	1.21223	5	6.01726	0.867883	5	2.29057	1.11108	5	4.68609	0.736869	5	12.2293	1.19705	5	1.93863	0.707156	5	6.24637	0.73863	5	8.07875	1.45878	5	4.98202	0	2.308e-12	107.86	4.61582e-10	3	2721.45	2.45831	84.7648	0
High	gWEEGVAQMSVGQR	5	1	1	Q62658	N-Term(TMT10)	0	0.953464	5	1.18362	1.01334	5	2.79859	1.01803	5	0.92343	1.02062	5	3.14082	0.960584	5	5.95841	1.05126	5	3.95454	0.993729	5	5.90639	1.03065	5	4.17147	1.05229	5	2.55501	0	5.945e-12	107.64	2.10068e-10	2	1762.88	1.71067	74.2264	0
High	qLEQQSAVcEGEGQVTSTSESTR	2	2	2	O08815;G3V7I8	N-Term(TMT10); C9(Carbamidomethyl)	0																												0	1.76e-15	107.61	1.02294e-10	3	2740.29	0.937128	58.0891	0
High	vGDTIPSVEVFEGEPGk	3	2	1	A0A0G2JSS8	N-Term(TMT10); K17(TMT10)	0	0.719382	3	0.854652	0.727795	3	0.453897	1.1266	3	0.164877	1.12254	3	1.54064	1.05454	3	2.86325	1.14101	3	1.25804	1.09119	3	1.0617	1.06226	3	1.87234	0.689716	3	3.63016	0	4.239e-14	107.37	6.10161e-10	2	2218.2	1.49394	85.8555	0
High	sLHQAIEGDTSGDFMk	2	1	1	Q6IMZ3	N-Term(TMT10); K16(TMT10)	0	1.26565	2	3.03039	1.31233	2	2.34798	0.71767	2	20.7892	0.864262	2	3.53491	0.788301	2	2.89084	0.918307	2	2.96032	0.822201	2	7.5707	0.816523	2	9.56597	1.86381	2	27.1357	0	2.607e-14	107.34	3.89298e-10	2	2194.12	1.16025	68.9285	0
High	lEQDQTTAQLQVQk	2	5	1	A0A0G2JU82	N-Term(TMT10); K14(TMT10)	0	1.03342	2	5.85054	1.18503	2	3.57397	0.972925	2	3.23957	0.992373	2	2.8409	0.951147	2	2.44332	0.970265	2	0.490159	0.983128	2	9.47601	0.935201	2	0.117227	1.06806	2	12.7798	0	1.656e-12	107.28	6.73446e-10	2	2088.17	2.12762	66.8575	0
High	sLFSSIGEVESAk	3	1	1	B5DF91	N-Term(TMT10); K13(TMT10)	0	1.03826	3	3.35032	1.09079	3	6.62186	0.912899	3	3.7363	1.00625	3	1.58971	0.94518	3	6.8548	1.10336	3	10.4527	0.961586	3	1.11115	0.906484	3	0.157148	1.03213	3	1.40705	0	7.86e-11	107.18	6.60418e-10	2	1812.02	1.67602	87.3545	0
High	eTVSEESNVLcLSk	10	2	1	P05197	N-Term(TMT10); C11(Carbamidomethyl); K14(TMT10)	0	0.980322	10	6.59684	1.03657	10	6.05477	0.985876	10	2.31056	1.03903	10	2.82829	1.01325	10	6.31761	1.02238	10	4.76494	0.97813	10	6.09137	0.98779	10	1.77048	0.996717	10	9.30927	0	1.409e-12	107.06	4.83116e-10	2	2053.09	-0.186448	76.1904	0
High	eAVVQAEEAAAEITR	1	2	1	Q5RJN5	N-Term(TMT10)	0	0.990739	1		1.06768	1		1.05441	1		1.02429	1		0.987449	1		1.02906	1		0.93501	1		0.985697	1		0.928344	1		0	1.428e-12	106.96	4.80273e-10	2	1815.97	0.711958	86.4812	0
High	qNMLQGTEIGVLAk	2	1	1	Q6P2A5	N-Term(TMT10); K14(TMT10)	0	0.889602	2	1.85671	0.944512	2	5.01316	1.01415	2	2.92871	1.0331	2	3.82728	1.11686	2	0.481589	1.00941	2	1.82254	1.08492	2	4.88562	0.969841	2	6.26909	0.907119	2	7.82925	0	3.337e-11	106.94	6.85804e-10	2	1960.13	0.716327	83.8957	0
High	eQIVVDLSHPGVSADDQVSR	1	2	1	G3V6C4	N-Term(TMT10)	0	0.942545	1		0.980259	1		0.967967	1		1.1006	1		0.949379	1		1.19985	1		0.883494	1		0.948343	1		0.974823	1		0	5.083e-13	106.93	4.38993e-10	2	2380.24	1.98126	72.9924	0
High	vEVSAPDVSIEGPEGk	9	2	1	A0A0G2JUA5	N-Term(TMT10); K16(TMT10)	0	1.11769	9	9.65186	1.13876	9	8.13395	0.947008	9	4.24686	0.96897	9	3.21505	0.952109	9	2.49092	0.980013	9	4.11202	0.947881	9	8.44429	0.944455	9	5.92382	1.13288	9	9.63969	0	4.644e-12	106.83	6.93021e-10	2	2071.14	1.86505	77.0091	0
High	aETGAGEGAPSQPPTVEVASDPQPPPAPEASASASAPPLR	2	1	1	Q3MIE4	N-Term(TMT10)	0	0.953575	2	1.18199	0.908145	2	1.70816	0.982289	2	2.99781	1.05038	2	1.90428	1.01031	2	4.04592	1.1105	2	6.7396	0.939805	2	2.56525	1.03027	2	9.21883	0.978373	2	3.39772	0	1.198e-16	106.65	3.52523e-10	3	4021	0.633357	70.7555	0
High	dLAEDLYDGQVLQk	4	2	1	G3V818	N-Term(TMT10); K14(TMT10)	0	1.14109	4	8.20512	1.23692	4	0.817905	0.907311	4	3.47048	0.953957	4	2.74141	0.929128	4	2.51618	0.95404	4	1.38258	0.913167	4	9.21306	0.902165	4	6.53028	1.24849	4	3.91745	0	1.254e-11	106.64	6.95833e-10	2	2065.13	1.67856	86.4459	0
High	aITGASLADIMAk	2	2	1	A0A0H2UH99	N-Term(TMT10); K13(TMT10)	0	1.00596	2	7.80288	1.07003	2	4.4157	0.999619	2	0.60796	1.04964	2	5.16667	0.959838	2	2.17974	1.04689	2	1.99899	0.925793	2	7.7499	0.887026	2	5.05109	1.0881	2	1.04924	0	2.078e-10	106.58	6.63754e-10	2	1720.01	2.05051	87.5475	0
High	eSESAPGDFSLSVk	1	1	1	P62994	N-Term(TMT10); K14(TMT10)	0	0.958694	1		0.991788	1		1.0172	1		1.02159	1		0.98337	1		1.04427	1		0.968493	1		0.987207	1		1.03519	1		0	6.076e-12	106.48	5.17283e-10	2	1911.01	1.50202	74.4183	0
High	wNTDNTLGTEITVEDQLAR	6	1	1	Q9Z2L0	N-Term(TMT10)	0	0.927014	6	0.995348	0.952968	6	3.81179	1.01482	6	4.50756	0.966847	6	2.39455	1.09015	6	6.40847	0.952077	6	2.94853	1.09276	6	6.331	1.07916	6	4.25201	0.879124	6	4.98635	0	2.961e-14	106.42	3.80817e-10	2	2405.22	2.01093	87.6192	0
High	vANPSGNLTDTYVQDcGDGTYk	6	1	1	C0JPT7	N-Term(TMT10); C16(Carbamidomethyl); K22(TMT10)	0	0.983186	6	5.63493	1.02716	6	3.3669	0.985045	6	1.07	1.06562	6	3.57501	0.950459	6	7.26645	1.0614	6	3.63633	0.936718	6	7.21756	0.958987	6	4.50494	1.02058	6	6.63444	0	1.341e-16	106.38	2.46254e-10	2	2833.37	-1.00211	73.378	0
High	iTENIGcVMTGMTADSR	2	2	1	A0A0G2K0D7	N-Term(TMT10); C7(Carbamidomethyl)	0	0.975518	2	12.1313	0.901417	2	8.7308	1.12128	2	7.69658	1.07258	2	1.70927	0.991054	2	1.33402	1.02133	2	8.2075	0.99679	2	0.154971	0.971553	2	2.01637	0.876632	2	5.39489	0	2.874e-14	106.25	1.68368e-10	2	2085	0.766368	86.377	0
High	aAAPAPEEEMDEcEQALAAEPk	10	1	1	Q68FR6	N-Term(TMT10); C13(Carbamidomethyl); K22(TMT10)	0	0.892124	10	4.60773	0.959544	10	1.27816	1.02803	10	3.00836	1.07209	10	2.22131	0.978623	10	3.36031	1.07814	10	1.11698	0.9472	10	1.94867	0.974271	10	4.69234	1.0177	10	5.44465	0	5.405e-17	106.22	2.06546e-10	2	2815.35	0.569955	79.2709	0
High	mAPYQGPDAAPGALDYk	9	4	1	Q9QXQ0	N-Term(TMT10); K17(TMT10)	0	1.02146	9	4.6334	1.07475	9	6.94737	0.913764	9	3.30348	1.02052	9	2.96781	0.932601	9	9.86896	1.04222	9	5.20639	0.94632	9	6.05621	0.969151	9	6.13994	1.17138	9	13.7299	0	8.154e-12	106.13	5.31443e-10	2	2223.16	1.45097	77.4277	0
High	aGQSVIGLQMGTNk	3	1	1	P37397	N-Term(TMT10); K14(TMT10)	0	0.901554	3	2.98564	0.913182	3	2.23466	1.03886	3	0.361515	1.0486	3	2.79274	0.963035	3	0.613004	1.07976	3	1.18684	0.99848	3	1.70473	1.02101	3	5.35857	0.985813	3	6.70813	0	9.914e-12	106.1	8.45647e-10	2	1862.06	1.3053	70.8697	0
High	sTGGAPTFNVTVTMTAk	15	1	1	P62963	N-Term(TMT10); K17(TMT10)	0	0.882495	15	5.09718	0.863402	15	7.64438	1.04466	15	3.89675	1.03686	15	3.23332	1.05238	15	2.86481	1.01975	15	2.35418	1.06544	15	2.25095	1.06198	15	3.77586	0.868151	15	6.85325	0	3.555e-15	105.97	6.62676e-10	2	2141.17	0.354633	81.7208	0
High	gTMDDISQEEGGSQGEESVSGSQR	1	2	1	F1LSS1	N-Term(TMT10)	0	1.11935	1		1.10193	1		1.02355	1		0.961573	1		0.950073	1		0.904715	1		0.929806	1		1.00443	1		1.12494	1		0	3.691e-14	105.97	6.32324e-11	3	2699.2	3.1184	56.3669	0
High	aGAGSATLSMAYAGAR	5	2	1	P04636	N-Term(TMT10)	0	1.04784	5	2.72036	1.0377	5	0.353715	0.975326	5	2.88082	1.03228	5	8.38306	1.00953	5	6.42526	1.05974	5	9.08296	0.963273	5	12.5372	0.954914	5	5.78738	0.979511	5	1.91305	0	1.145e-13	105.9	4.12549e-10	2	1683.87	2.05753	66.8078	0
High	tLEEQNQLLSAELGGLR	1	2	1	G3V8F8	N-Term(TMT10)	0	1.43124	1		1.30089	1		0.926396	1		0.822594	1		0.902891	1		0.826656	1		0.920034	1		0.974516	1		1.19975	1		0	3.315e-13	105.81	7.151e-10	2	2100.15	1.4172	87.7409	0
High	aQALAIETEAELER	2	2	1	Q62667	N-Term(TMT10)	0	0.907667	2	6.45483	0.917264	2	7.44634	1.01904	2	4.3433	1.07795	2	5.75849	0.980642	2	3.81858	1.08859	2	0.847081	0.990217	2	3.05304	0.992746	2	2.90599	0.969836	2	9.43811	0	2.17e-11	105.75	6.86467e-10	2	1772.96	1.53323	83.2962	0
High	iPFEPESVSAEEALk	2	1	1	F1LP76	N-Term(TMT10); K15(TMT10)	0	0.861527	2	4.26952	0.839803	2	1.25375	1.07962	2	4.40855	1.05667	2	1.71563	0.998691	2	8.94119	1.13726	2	0.167949	1.02763	2	8.25461	1.02646	2	5.32563	0.851327	2	1.84958	0	1.053e-12	105.74	9.06732e-10	2	2104.16	1.09714	86.3913	0
High	lASGGPVDTGPEYQQEVDR	2	1	1	P21571	N-Term(TMT10)	0	0.924069	2	1.3494	0.877642	2	0.151081	0.988059	2	0.119361	1.0631	2	1.52733	1.04926	2	0.991269	1.01482	2	2.60608	1.13641	2	9.47004	1.02888	2	0.4684	0.87138	2	16.5026	0	1.348e-12	105.62	3.16652e-10	2	2247.11	1.85373	63.2845	0
High	gPDGLTALEATDNQAIk	5	1	1	P62775	N-Term(TMT10); K17(TMT10)	0	1.04788	5	9.75629	1.06954	5	6.7656	0.950613	5	3.84959	0.98577	5	1.08158	1.00386	5	3.6843	0.97481	5	3.22403	0.961074	5	2.50379	0.984635	5	3.43595	1.09744	5	1.11119	0	1.155e-14	105.55	7.45287e-10	2	2172.19	1.63269	78.4978	0
High	lLHVAVSDVNDDVR	2	6	1	A0A0G2JTW5	N-Term(TMT10)	0	0.984497	2	5.41169	1.07993	2	0.810028	0.959418	2	1.87676	1.07198	2	8.2981	0.976093	2	3.85651	1.01767	2	0.615373	0.949334	2	0.119618	0.959213	2	4.58665	1.03687	2	2.72089	0	2.077e-11	105.54	8.54518e-10	2	1780.98	2.30691	71.2436	0
High	qISQAYEVLADSk	2	1	1	P63036	N-Term(TMT10); K13(TMT10)	0	1.16072	2	7.9849	1.13423	2	4.52573	0.899933	2	4.30576	0.980503	2	2.12437	0.943698	2	1.38987	0.978437	2	1.68955	0.934845	2	3.70624	0.970398	2	0.89825	1.14022	2	0.738678	0	1.036e-10	105.36	9.43072e-10	2	1910.07	2.72654	83.7542	0
High	gVDIVMDPLGGSDTAk	1	1	1	Q3MIE4	N-Term(TMT10); K16(TMT10)	0	0.92402	1		0.968112	1		1.03761	1		1.12275	1		0.939993	1		1.09659	1		0.92487	1		1.03559	1		0.878675	1		0	1.737e-11	105.35	7.92081e-10	2	2033.1	0.435696	86.2067	0
High	dAGEGGLSLAIEGPSk	4	1	1	C0JPT7	N-Term(TMT10); K16(TMT10)	0	0.986058	4	0.969979	1.02745	4	2.78354	0.986427	4	2.31308	1.02047	4	2.41506	0.981725	4	2.96611	1.02634	4	3.34631	0.983099	4	4.11708	0.993464	4	1.12513	0.969951	4	2.62254	0	1.034e-12	105.26	8.77173e-10	2	1959.08	1.38019	77.1977	0
High	tSQLNVGTSTDVSLk	3	2	1	A0A0H2UHR7	N-Term(TMT10); K15(TMT10)	0	0.999101	3	4.48878	0.986972	3	2.22837	1.00692	3	0.490868	0.949214	3	2.41455	1.13914	3	3.79574	0.913905	3	2.56042	1.06884	3	4.79529	1.05112	3	2.83628	0.934558	3	7.71057	0	4.522e-13	105.25	1.06877e-09	2	2008.14	1.77417	70.3153	0
High	eGNPEEDITADQTNAQAAALYk	5	1	1	Q6AYC4	N-Term(TMT10); K22(TMT10)	0	0.902693	5	2.6419	0.956704	5	4.98582	1.03019	5	2.0365	1.03651	5	0.489016	0.946228	5	2.54154	1.10728	5	4.81662	0.97128	5	3.41505	0.97909	5	1.8843	0.976766	5	4.12817	0	2.358e-17	105.22	6.02718e-10	2	2807.41	1.35736	75.0933	0
High	iDQYQGADAVGLEEk	4	2	1	Q920J4	N-Term(TMT10); K15(TMT10)	0	1.07781	4	0.820369	1.04945	4	4.18835	0.989509	4	1.19113	0.994728	4	5.37451	1.00223	4	2.84269	0.992604	4	0.834188	0.936525	4	3.91419	0.986128	4	2.40345	1.02712	4	4.56618	0	1.226e-12	105.21	7.92421e-10	2	2094.11	0.869977	74.2693	0
High	gGIQVPGVDVSSSLGGGSVEGQGPSLQSGDIGk	1	3	1	A0A0G2JUA5	N-Term(TMT10); K33(TMT10)	0	1.0063	1		1.12935	1		0.890708	1		0.925004	1		1.01913	1		1.03825	1		1.06155	1		0.966864	1		1.06597	1		0	3.691e-13	105.16	8.44267e-10	3	3483.83	-0.160315	85.7826	0
High	gNPTVEVDLYTAk	18	3	1	M0R5J4	N-Term(TMT10); K13(TMT10)	0	0.946833	18	3.45939	0.987966	18	3.94656	0.997259	18	3.62924	1.06506	18	3.52585	0.975087	18	4.27637	1.08878	18	3.0852	0.956801	18	4.58251	0.946135	18	3.43988	1.02397	18	3.0319	0	1.312e-10	105.13	9.00758e-10	2	1865.05	2.05933	75.5947	0
High	aVAQGNLSSADVQAAk	3	1	1	P32551	N-Term(TMT10); K16(TMT10)	0	0.955961	3	7.06567	0.935467	3	9.4862	0.993364	3	1.03133	1.04364	3	0.98247	1.00303	3	7.23726	1.04313	3	3.49773	1.00244	3	0.0435453	0.964318	3	9.99461	1.03558	3	4.98415	0	1.983e-10	105.1	9.61082e-10	3	1988.12	1.20518	59.7413	0
High	lSEDLPSDAETSAQAAAGASLk	3	1	1	F1LUD3	N-Term(TMT10); K22(TMT10)	0	0.989202	3	0.34546	0.982237	3	0.317985	0.965939	3	0.258931	1.02008	3	4.08052	0.950919	3	3.74815	1.04216	3	3.44806	0.959405	3	1.09646	1.00053	3	3.58522	1.06873	3	3.47046	0	2.892e-17	105.1	9.02366e-10	2	2590.36	0.490714	83.7509	0
High	gFIGPGIDVPAPDMSTGER	4	1	1	P10860	N-Term(TMT10)	0	1.0693	4	9.30767	1.08517	4	4.61725	0.955237	4	5.94736	1.03374	4	4.45393	0.949863	4	2.04375	1.03898	4	0.381416	0.89405	4	1.5307	0.902029	4	1.83644	1.10981	4	2.898	0	2.897e-12	104.97	5.55642e-10	2	2145.09	2.10237	85.0349	0
High	tVGIVGNQPNVASGcLDINSSVk	2	2	1	Q68FZ8	N-Term(TMT10); C15(Carbamidomethyl); K23(TMT10)	0	0.769498	2	6.03759	0.811753	2	6.01424	1.07682	2	1.10354	1.05906	2	0.942142	1.07597	2	1.76911	1.07411	2	3.75346	1.13764	2	2.36014	1.09321	2	0.488704	0.763461	2	2.08199	0	3.556e-15	104.93	9.1268e-10	2	2787.51	1.75406	81.6277	0
High	nVGTGLVGAPAcGDVMk	1	1	1	B2RZ79	N-Term(TMT10); C12(Carbamidomethyl); K17(TMT10)	0	0.976243	1		0.973593	1		1.01527	1		1.0124	1		1.08754	1		0.924375	1		1.10534	1		1.01485	1		0.912331	1		0	7.87e-15	104.86	9.07914e-10	2	2104.13	1.77702	73.8245	0
High	aAGPLESSGIEEVTQLk	1	1	1	F1M853	N-Term(TMT10); K17(TMT10)	0	1.19962	1		1.24112	1		0.898029	1		0.949937	1		0.909333	1		0.999821	1		0.887494	1		0.887048	1		1.21381	1		0	6.631e-15	104.79	1.03219e-09	2	2187.23	0.543118	86.0645	0
High	lQEYFGVTDGAGDH	2	1	1	D3ZW55	N-Term(TMT10)	0	0.984213	2	12.5502	0.956301	2	15.8674	0.978075	2	9.77243	1.01614	2	1.45119	0.985299	2	3.97838	1.03536	2	3.21711	0.95705	2	9.78599	1.04065	2	1.80115	1.0543	2	12.1939	0	5.675e-11	104.77	1.96722e-10	2	1737.83	1.31695	83.4897	0
High	gTIQVVTQGTSLk	3	1	1	O08651	N-Term(TMT10); K13(TMT10)	0	0.673002	3	11.8137	0.726734	3	4.6851	1.13169	3	2.15168	1.13593	3	7.12438	1.13208	3	0.793519	1.16505	3	4.81324	1.05735	3	1.45797	1.08424	3	4.47029	0.725278	3	7.31048	0	1.511e-10	104.74	1.00721e-09	2	1790.08	1.74935	71.146	0
High	cAEVTLEGQMYPGk	3	1	1	Q5U2R7	N-Term(TMT10); C1(Carbamidomethyl); K14(TMT10)	0	0.981035	3	5.18937	0.979716	3	3.17071	0.985529	3	0.996409	1.02877	3	1.83453	1.02355	3	2.17505	0.974897	3	3.23304	1.0148	3	1.2589	1.01714	3	6.0121	1.03503	3	2.23019	0	3.302e-11	104.64	6.26993e-10	2	2041.05	1.8163	73.2885	0
High	aTEMVEVGPDDDEVGAER	6	2	1	G3V8L9	N-Term(TMT10)	0	0.995763	6	6.1849	0.976872	6	12.2104	0.961879	6	4.31563	0.963389	6	5.30252	1.01816	6	5.03986	0.983767	6	2.06693	1.02176	6	7.7508	1.04141	6	8.9021	1.06673	6	7.35379	0	1.667e-11	104.59	1.33801e-10	2	2148	0.954123	66.2702	0
High	mGLAMGGAGGASFDR	1	3	1	F1LV13	N-Term(TMT10)	0	1.07135	1		0.988383	1		0.99189	1		0.909301	1		1.13121	1		0.839883	1		1.16639	1		1.09899	1		0.893734	1		0	1.148e-12	104.55	3.19184e-10	2	1626.8	1.991	73.2274	0
High	nYQQNYQNSESGEkNEGSESAPEGQAQQR	3	4	1	P62961	N-Term(TMT10); K14(TMT10)	0	0.981197	3	2.88952	0.969903	3	8.0178	1.08265	3	21.1642	1.0327	3	10.1123	0.987699	3	3.61342	0.944711	3	2.3443	0.992563	3	15.7128	0.966405	3	8.0731	0.918275	3	6.60039	0	3.097e-17	104.53	1.72662e-10	3	3715.72	-0.666256	47.9497	1
High	lVVPASQcGSLIGk	2	4	1	Q4V8F6	N-Term(TMT10); C8(Carbamidomethyl); K14(TMT10)	0	1.10206	2	3.92754	1.11591	2	0.379401	0.995418	2	6.12933	1.01589	2	2.14434	0.893382	2	1.14606	1.00931	2	6.31496	0.897377	2	0.634899	0.921775	2	4.29703	1.13456	2	5.01445	0	1.5e-11	104.5	9.73963e-10	2	1887.12	2.37634	79.716	0
High	tEVVETTQVYTEEETR	3	12	1	Q6S3A0	N-Term(TMT10)	0	1.00872	3	9.09377	0.971006	3	11.6707	1.06116	3	0.722027	1.00271	3	0.749881	1.08226	3	8.5392	0.952081	3	1.84198	1.0583	3	7.00971	1.03148	3	7.50629	0.822117	3	1.65599	0	5.413e-14	104.5	5.21576e-10	2	2143.06	0.635482	67.7853	0
High	dLLVTGAYEITDQSGGAGGLR	1	1	1	Q63584	N-Term(TMT10)	0	1.02853	1		1.10656	1		0.974428	1		1.05854	1		0.942736	1		1.0074	1		0.968428	1		0.953119	1		1.00923	1		0	2.495e-14	104.47	8.93182e-10	2	2322.22	1.97232	87.4797	0
High	rAEDGSVIDYELIDQDAR	8	1	1	Q07936	N-Term(TMT10)	0	0.999387	8	2.82037	1.01081	8	4.64055	0.974731	8	3.15345	1.02198	8	7.38046	0.973032	8	3.65416	1.06681	8	6.12073	0.939767	8	9.46291	0.976837	8	3.88281	1.04784	8	9.5934	0	1.099e-10	104.46	4.99545e-10	2	2294.15	0.108395	74.2925	1
High	fSFcFSPEPEAEAAAGPGPcER	1	2	1	O08623	N-Term(TMT10); C4(Carbamidomethyl); C20(Carbamidomethyl)	0	0.791849	1		0.784159	1		1.29514	1		1.18008	1		0.931916	1		1.1724	1		0.938809	1		0.947719	1		0.700135	1		0	1.734e-13	104.43	6.6707e-11	2	2642.19	1.91356	87.5425	0
High	eQGVTFPSGEAQEQLIR	5	1	1	P12785	N-Term(TMT10)	0	1.23145	5	0.63296	1.15952	5	12.5299	0.960849	5	13.8215	0.937026	5	4.93224	0.965246	5	4.85036	0.925989	5	1.16362	0.997209	5	7.39055	0.98286	5	8.49995	1.08333	5	15.9373	0	2.866e-14	104.4	9.25849e-10	2	2118.11	1.55586	74.5903	0
High	aTEEPSGTGSDELIk	4	2	1	G3V8L9	N-Term(TMT10); K15(TMT10)	0	1.14145	4	5.87558	1.1828	4	3.42063	0.931339	4	2.35871	0.950867	4	0.653545	0.884794	4	1.82125	0.970187	4	1.31231	0.927336	4	8.96059	0.930859	4	7.60404	1.24322	4	8.46496	0	1.736e-09	104.37	8.26244e-10	3	1992.05	0.454984	61.5799	0
High	gAAIDALNDGELQk	2	1	1	P50503	N-Term(TMT10); K14(TMT10)	0	1.00031	2	0.00961921	1.01972	2	1.56203	0.985832	2	6.3665	1.01708	2	1.16868	0.955982	2	5.59424	1.06498	2	0.313221	0.980467	2	2.85387	0.926916	2	0.071851	1.07667	2	9.63636	0	2.073e-11	104.3	1.09603e-09	2	1873.05	2.25065	74.4795	0
High	iVITGDAALDHDQALAQAIR	3	5	1	D3ZDT1	N-Term(TMT10)	0	1.18115	3	3.15114	1.11134	3	11.0404	0.898465	3	2.26841	0.918735	3	1.79071	1.03426	3	0.37889	0.970635	3	4.70909	0.906432	3	16.786	0.928723	3	2.46467	1.23789	3	5.79191	0	6.799e-14	104.3	1.32638e-09	2	2320.29	1.23715	82.2318	0
High	aDQWNVNYVETSAk	3	1	1	P63322	N-Term(TMT10); K14(TMT10)	0	1.01924	3	1.53573	1.0211	3	7.37816	0.981736	3	1.11592	1.04873	3	1.4149	0.925586	3	3.82652	1.07238	3	0.935936	0.924139	3	3.42376	0.93983	3	0.698008	1.12141	3	4.42878	0	2.247e-12	104.24	8.60768e-10	2	2083.09	1.11911	75.5848	0
High	vNQIGSVTESIQAck	34	4	2	P15429;M0R5J4	N-Term(TMT10); C14(Carbamidomethyl); K15(TMT10)	0																												0	3.812e-13	104.23	1.20446e-09	2	2092.15	2.76962	78.5128	0
High	ySQTGNYELAVALSR	2	1	1	Q641Y0	N-Term(TMT10)	0	1.01105	2	1.97805	0.957534	2	0.32838	0.988699	2	4.88028	0.98717	2	0.516125	1.00482	2	5.72847	1.007	2	2.98248	1.03224	2	0.996643	1.06348	2	4.23005	0.971651	2	4.69773	0	1.013e-12	104.21	7.90872e-10	2	1901	1.91396	79.6184	0
High	aVQEQLQVNDNTk	2	2	1	A0A0G2K4T9	N-Term(TMT10); K13(TMT10)	0	1.07498	2	4.4558	1.06143	2	0.404852	0.93872	2	2.42177	0.949737	2	6.84261	0.914602	2	1.40659	1.06486	2	4.99556	0.948416	2	2.80996	0.942689	2	3.76228	1.20322	2	3.41519	0	1.502e-11	104.14	1.12945e-09	2	1945.07	-0.338599	58.6351	0
High	vEDSQQcLQVEEGLQEEQHQESLR	1	3	1	G3V8F8	N-Term(TMT10); C7(Carbamidomethyl)	0	1.29845	1		1.3877	1		0.809904	1		0.905185	1		0.883187	1		0.957177	1		0.75763	1		0.875566	1		1.43636	1		0	8.78e-16	104.1	2.74277e-10	3	3127.49	1.79812	70.3467	0
High	sDNILLGMDGSVk	1	2	1	Q62829	N-Term(TMT10); K13(TMT10)	0	1.12645	1		1.16161	1		0.966226	1		0.883562	1		1.00015	1		0.92165	1		1.00197	1		0.973211	1		1.12667	1		0	1.424e-10	104.08	1.29173e-09	2	1807.01	1.79758	84.209	0
High	lYAQDADGcPIDIk	3	2	1	A0A0H2UHR7	N-Term(TMT10); C9(Carbamidomethyl); K14(TMT10)	0	1.18339	3	2.56595	1.22116	3	10.7935	0.935436	3	0.36549	1.05001	3	9.74952	0.824753	3	3.39104	0.991466	3	2.92767	0.829311	3	5.57439	0.834109	3	4.57516	1.22392	3	0.339591	0	9.194e-12	104.04	1.06109e-09	2	2037.08	1.51392	77.8624	0
High	tVENVTVFGTASASk	6	1	1	Q3MIE4	N-Term(TMT10); K15(TMT10)	0	0.843061	6	3.10427	0.859094	6	5.30421	1.0488	6	2.72976	1.03812	6	2.61017	1.06666	6	3.35171	1.04256	6	0.450735	1.06613	6	2.90374	1.06721	6	4.73397	0.848555	6	4.6368	0	5.23e-13	103.98	1.14384e-09	2	1969.1	1.27048	74.1388	0
High	gEGVGIDVALPTGk	5	3	1	A0A0G2JUA5	N-Term(TMT10); K14(TMT10)	0	1.12467	5	8.14604	1.19572	5	8.10643	0.97732	5	6.04301	0.951712	5	3.86814	0.925324	5	3.89271	0.985798	5	3.79122	0.939027	5	7.02095	0.874731	5	1.32076	1.18941	5	8.96422	0	3.532e-11	103.91	1.01001e-09	2	1771.04	1.73071	80.9611	0
High	gVEVTVGHEQEEGGk	6	1	1	P56571	N-Term(TMT10); K15(TMT10)	0	0.895324	6	2.75057	0.928172	6	5.82874	1.02151	6	1.06824	1.05149	6	6.21765	1.0535	6	2.01709	1.03111	6	7.00084	0.995437	6	7.86023	0.986488	6	4.68719	0.976355	6	9.63131	0	1.546e-13	103.91	9.59206e-10	2	2013.07	1.44039	54.0193	0
High	vVPEESEAQAEGcSEER	3	1	1	B1WC56	N-Term(TMT10); C13(Carbamidomethyl)	0	0.975087	3	2.87488	0.890225	3	4.75505	1.01861	3	3.32854	0.923277	3	0.932543	1.07022	3	6.75899	0.911128	3	3.98859	1.14502	3	10.4434	1.08603	3	0.0235292	0.957342	3	6.8987	0	9.717e-15	103.89	1.36787e-10	2	2134.98	0.121153	55.486	0
High	eDQSILcTGESGAGk	4	9	3	G3V6P7;F1LNF0;G3V9Y1	N-Term(TMT10); C7(Carbamidomethyl); K15(TMT10)	0																												0	1.67e-12	103.78	7.6011e-10	2	2010.02	0.942143	62.4462	0
High	vNDGVcDccDGTDEYNSGTVcENTcR	2	1	1	B1WC34	N-Term(TMT10); C6(Carbamidomethyl); C8(Carbamidomethyl); C9(Carbamidomethyl); C21(Carbamidomethyl); C25(Carbamidomethyl)	0	0.99361	2	2.89756	0.979445	2	6.14879	0.993472	2	9.04342	0.913245	2	8.00902	0.933961	2	8.86195	1.08519	2	0.378153	1.00215	2	17.2055	0.941097	2	2.70418	1.1997	2	15.7337	0	1.137e-15	103.78	4.17802e-11	3	3286.27	0.400831	59.1326	0
High	qEELESVEAGVQGGAFEGTR	1	1	1	Q4V8H8	N-Term(TMT10)	0	1.17081	1		1.12231	1		0.924078	1		0.9285	1		0.924937	1		0.883077	1		1.03281	1		1.02362	1		1.17064	1		0	6.611e-14	103.77	4.59636e-10	2	2322.15	1.6596	80.7863	0
High	dVAWAPSIGLPTSTIAScSQDGR	1	1	1	Q5XFW8	N-Term(TMT10); C18(Carbamidomethyl)	0	0.970186	1		1.12589	1		1.02216	1		1.03468	1		0.9003	1		1.05815	1		0.867959	1		0.888003	1		1.18215	1		0	6.613e-14	103.72	6.96376e-10	2	2618.31	0.87735	87.5674	0
High	aAVGLTGNDIATPPNk	2	2	2	A0A0G2JW88;Q5M7W5	N-Term(TMT10); K16(TMT10)	0																												0	3.698e-12	103.52	1.45394e-09	2	1997.15	1.27895	67.315	0
High	sLTMVEDNDDEEEDGDELLHHHR	7	7	1	G3V8L3	N-Term(TMT10)	0	1.0769	7	8.32285	1.03774	7	9.31365	0.945999	7	3.65943	0.991701	7	6.28556	0.989379	7	14.6615	0.980675	7	2.0632	0.993274	7	10.254	0.924686	7	7.56667	1.07059	7	4.21554	0	1.614e-11	103.51	9.35878e-11	4	2964.32	1.33561	64.4814	0
High	dVVIcPDTSLEEAk	6	2	1	O88767	N-Term(TMT10); C5(Carbamidomethyl); K14(TMT10)	0	1.01142	6	3.38782	1.02469	6	4.61866	0.986203	6	1.98159	1.03811	6	1.97253	0.977055	6	1.37712	1.01453	6	4.37673	0.959754	6	1.23348	0.965753	6	2.09257	1.06994	6	3.02642	0	1.471e-08	103.45	1.21775e-09	2	2034.09	1.70302	77.884	0
High	qLLLDSQSQLEEAk	2	1	1	F1M853	N-Term(TMT10); K14(TMT10)	0	1.0668	2	7.48493	1.09584	2	10.8993	0.946718	2	0.930693	0.97812	2	2.59844	0.997271	2	2.4364	0.968393	2	2.29058	0.969871	2	4.46758	0.994111	2	0.689167	1.07911	2	7.45188	0	9.724e-12	103.39	1.54623e-09	2	2060.17	2.64827	81.3101	0
High	eGGSIPVTLTFQEATGk	1	1	1	Q6Q0N1	N-Term(TMT10); K17(TMT10)	0	0.966113	1		1.02756	1		1.01369	1		1.12099	1		0.987759	1		1.05852	1		0.936768	1		0.912007	1		0.953324	1		0	7.276e-14	103.38	1.44418e-09	2	2193.22	0.797074	85.1672	0
High	aGNLGGGVVTIER	3	2	1	Q6PDV8	N-Term(TMT10)	0	0.945117	3	11.2857	0.998582	3	6.76781	1.07031	3	3.93565	1.03876	3	1.54134	1.02678	3	0.00762274	1.02483	3	0.109736	0.983008	3	2.84107	1.00194	3	8.07216	0.877088	3	5.63485	0	1.897e-10	103.35	1.19063e-09	2	1471.85	2.30992	66.4271	0
High	nAAQVLVGIPLETGQk	3	1	1	Q68FS2	N-Term(TMT10); K16(TMT10)	0	0.997875	3	0.663255	0.958766	3	8.18534	0.963766	3	1.04697	1.01343	3	2.41293	1.04779	3	4.04154	0.980944	3	2.66305	1.01669	3	7.88491	1.03855	3	2.84987	0.967097	3	13.1446	0	2.99e-12	103.34	1.11922e-09	2	2096.25	-0.209473	85.6584	0
High	vDHVQMIVLDEADk	2	1	1	D3ZD73	N-Term(TMT10); K14(TMT10)	0	0.999473	2	0.231749	1.0101	2	4.72368	1.03439	2	10.1016	0.953516	2	1.70213	1.05149	2	5.50445	1.00736	2	5.37145	0.997532	2	7.0235	0.960408	2	7.6734	1.01496	2	1.86366	0	7.339e-12	103.33	1.32155e-09	2	2070.13	1.66439	80.8934	0
High	tFGPVPEFSGDTVEk	2	1	1	Q811X6	N-Term(TMT10); K15(TMT10)	0	0.94242	2	1.84373	0.929943	2	5.4678	1.04005	2	0.934552	0.99095	2	0.820731	1.06706	2	2.16491	1.01239	2	2.46765	1.06274	2	0.847373	1.05178	2	3.87705	0.87879	2	2.71893	0	9.754e-13	103.25	1.39343e-09	2	2068.1	1.06927	83.9378	0
High	vEGDVVLPSVQGDLk	2	1	1	F1LUD3	N-Term(TMT10); K15(TMT10)	0	1.03242	2	0.363403	1.05556	2	3.52409	0.98752	2	4.16298	1.00278	2	2.47327	0.976668	2	5.88026	1.02533	2	2.70035	0.951569	2	4.78847	1.00799	2	4.30333	1.00146	2	0.571163	0	5.225e-11	103.23	1.52583e-09	2	2013.17	1.60752	83.2441	0
High	eNQSILITGESGAGk	2	14	2	A0A0G2K0F5;G3V6D8	N-Term(TMT10); K15(TMT10)	0																												0	1.584e-12	103.11	1.59545e-09	2	1962.09	2.0544	67.4214	0
High	kHPDASVNFSEFSk	6	11	1	D3ZCR3	N-Term(TMT10); K1(TMT10); K14(TMT10)	0	1.18842	6	4.92581	1.26883	6	0.804809	0.856239	6	3.24965	1.04009	6	3.11884	0.782989	6	1.43342	1.05217	6	2.91634	0.761038	6	1.24668	0.775793	6	3.09656	1.44857	6	2.42805	0	6.388e-12	103.11	1.61988e-09	3	2280.27	2.82943	66.6803	1
High	iSMADVDLNVAAPk	3	2	1	A0A0G2JUA5	N-Term(TMT10); K14(TMT10)	0	1.18794	3	1.57889	1.16673	3	1.96584	0.922236	3	0.442251	0.919691	3	3.06764	0.927718	3	3.85385	0.922423	3	1.70928	0.927274	3	3.82705	0.940611	3	2.61194	1.21113	3	1.64798	0	1.211e-10	103.02	1.45425e-09	2	1902.08	2.2087	85.0416	0
High	gDVTTQVALQPALk	7	1	1	P07895	N-Term(TMT10); K14(TMT10)	0	0.863688	7	9.67783	0.914425	7	1.7346	1.10846	7	4.1063	1.12283	7	3.57024	0.923306	7	5.29916	1.12338	7	9.90887	0.917943	7	1.47619	0.926235	7	8.95296	0.943715	7	6.64586	0	2.439e-11	103.01	1.27759e-09	2	1899.13	1.36777	73.0867	0
High	gMTASQMVQTLSLDk	2	1	1	Q6P9U0	N-Term(TMT10); K15(TMT10)	0	0.837786	2	9.21913	0.862431	2	2.82636	1.06243	2	3.99025	1.0988	2	5.6437	1.01827	2	0.276085	1.09662	2	2.40707	0.978385	2	2.48348	1.08148	2	4.57439	0.843281	2	14.7658	0	9.874e-13	102.97	1.58464e-09	2	2068.12	1.58324	87.7392	0
High	vYcNLETGETcISANPASVPR	2	2	1	F1LQ00	N-Term(TMT10); C3(Carbamidomethyl); C11(Carbamidomethyl)	0	1.08582	2	19.8112	1.10447	2	21.8263	0.987091	2	3.05063	0.941324	2	4.41557	0.974535	2	12.4537	0.923524	2	4.96256	0.98238	2	13.3802	1.02554	2	14.0406	1.0478	2	19.8265	0	9.79e-16	102.93	5.62811e-10	2	2567.25	0.753137	74.7343	0
High	sMLQATAEANNLAAAASAk	3	1	1	A0A0G2JSS9	N-Term(TMT10); K19(TMT10)	0	0.935627	3	3.49457	0.950023	3	0.844914	0.968209	3	0.166807	0.982435	3	3.76049	1.03559	3	0.578423	0.970351	3	0.047884	1.09223	3	1.14039	1.11101	3	1.86215	0.958971	3	2.42792	0	2.279e-15	102.82	1.47316e-09	2	2291.25	1.13378	85.4593	0
High	yTDQSGEEEEDYESEEQIQHR	1	1	1	Q68FT1	N-Term(TMT10)	0	0.984429	1		0.960597	1		0.956975	1		1.02788	1		1.02984	1		1.11493	1		0.972375	1		0.923491	1		1.03366	1		0	6.63e-14	102.82	5.21159e-11	3	2830.21	0.429639	55.6699	0
High	gYDVIAQAQSGTGk	5	3	2	Q6P3V8;Q5RKI1	N-Term(TMT10); K14(TMT10)	0																												0	2.392e-11	102.79	1.48863e-09	2	1853.02	2.46984	66.4586	0
High	aEAGAGSATEFQFR	2	3	1	P63326	N-Term(TMT10)	0	0.961506	2	1.14883	0.976165	2	0.81405	1.01205	2	0.471366	1.03135	2	3.55148	1.02338	2	2.24462	1.05613	2	2.77106	0.945276	2	2.98869	1.01585	2	2.87838	0.966138	2	7.8016	0	1.255e-11	102.77	7.0019e-10	2	1670.84	3.08193	64.8154	0
High	eLGEYGLQAYTEVk	2	2	2	P11884;F1LN88	N-Term(TMT10); K14(TMT10)	0																												0	3.615e-12	102.76	1.48835e-09	2	2058.12	2.02587	84.2761	0
High	qGNMTAALQAALk	2	2	1	Q4KLF8	N-Term(TMT10); K13(TMT10)	0	0.980152	2	5.82474	0.965012	2	2.68652	1.01611	2	4.51496	0.984924	2	2.35136	1.06743	2	5.92386	0.949067	2	10.0598	1.10033	2	7.13631	1.06381	2	12.7166	0.877568	2	0.488067	0	4.928e-11	102.72	1.67853e-09	2	1775.03	1.73996	84.611	0
High	vDQSILTGESVSVIk	3	3	2	P11507;Q64578	N-Term(TMT10); K15(TMT10)	0																												0	1.419e-12	102.7	1.57619e-09	2	2033.19	2.03415	84.2744	0
High	scASQLVLGDNSPALR	1	1	1	P13221	N-Term(TMT10); C2(Carbamidomethyl)	0	0.836521	1		0.764582	1		1.15051	1		1.03121	1		1.11664	1		1.05734	1		1.12498	1		1.05753	1		0.712508	1		0	3.44e-12	102.68	1.05744e-09	2	1917.01	1.11689	70.3257	0
High	sTQGVTLTDLQEAEk	2	6	1	D4A1S6	N-Term(TMT10); K15(TMT10)	0	0.895538	2	1.4629	0.983325	2	1.67355	1.05327	2	0.354162	1.09563	2	3.14658	0.978471	2	1.79688	1.03358	2	2.8553	1.03136	2	0.454931	0.962022	2	1.07484	0.917272	2	1.02455	0	3.664e-13	102.67	1.80342e-09	2	2078.14	1.18726	73.9105	0
High	aIGVSNFNPLQIER	4	1	1	P07943	N-Term(TMT10)	0	0.65724	4	7.95319	0.672668	4	3.43741	1.13432	4	2.58854	1.26063	4	1.63066	1.06961	4	2.34404	1.21764	4	7.11827	1.02655	4	0.935509	0.976195	4	1.9892	0.707529	4	8.37648	0	5.635e-11	102.59	1.66344e-09	2	1787	1.78561	87.0471	0
High	lEEDQIIMEDQNck	4	2	1	G3V6P7	N-Term(TMT10); C13(Carbamidomethyl); K14(TMT10)	0	1.04379	4	4.75781	1.00653	4	4.61671	1.01944	4	1.79616	1.02137	4	2.08393	0.9899	4	4.74101	1.00779	4	2.66526	0.98059	4	4.45733	0.951194	4	4.34483	1.02243	4	6.70702	0	4.742e-12	102.54	7.91204e-10	2	2223.11	1.41779	75.1992	0
High	lGPALATGNVVVMk	2	2	2	P11884;F1LN88	N-Term(TMT10); K14(TMT10)	0																												0	3.435e-11	102.38	1.20533e-09	2	1828.12	2.10909	83.8924	0
High	sVILEAFSSPSEEVk	2	1	1	P97536	N-Term(TMT10); K15(TMT10)	0	0.947252	2	2.02588	0.983556	2	9.29116	0.979941	2	0.706171	1.03664	2	2.47677	1.01992	2	1.79326	1.02934	2	2.23474	1.05727	2	0.444068	0.991808	2	4.63099	0.952738	2	1.33208	0	2.741e-10	102.29	1.85323e-09	2	2080.16	2.52299	87.8584	0
High	scSAAADGSLQWDR	2	2	1	G3V8P5	N-Term(TMT10); C2(Carbamidomethyl)	0	0.921335	2	7.46321	0.919914	2	0.00838909	1.05881	2	4.18428	1.00078	2	0.382999	1.04254	2	2.43729	0.955156	2	5.40102	1.11566	2	4.49038	1.08727	2	1.00586	0.873845	2	0.834106	0	4.374e-12	102.26	2.08002e-10	2	1752.82	-0.0165214	63.4028	0
High	gSSGVGLTAAVTTDQETGER	3	1	1	D3ZFP4	N-Term(TMT10)	0	1.32217	3	14.5656	1.31138	3	23.8832	0.91174	3	11.2734	0.868368	3	0.710447	0.890436	3	17.0863	0.883809	3	5.94126	0.843983	3	7.5361	0.837456	3	4.19264	1.43454	3	3.36106	0	5.006e-16	102.22	1.02264e-09	2	2165.09	1.12448	63.5452	0
High	aETEEAEEPEEDGEDNVSGSASk	1	1	1	P15205	N-Term(TMT10); K23(TMT10)	0	0.707381	1		0.776661	1		1.13307	1		1.06003	1		1.10827	1		1.05477	1		1.17696	1		1.00194	1		0.828024	1		0	7.009e-14	102.14	1.68009e-10	3	2867.3	0.00037628	54.5093	0
High	tQEASDEAADQEEEAYLRED	2	1	1	Q5RK17	N-Term(TMT10)	0	0.8996	2	0.461618	0.964016	2	3.85185	1.02843	2	5.13803	1.02435	2	11.9125	1.05772	2	5.05903	1.00212	2	1.20689	1.07772	2	1.2447	1.04862	2	0.459082	0.857105	2	15.7148	0	4.524e-12	102.08	8.36245e-11	3	2528.12	1.92104	66.4867	1
High	kHPDADSLYVEEVDVGEAAPR	1	1	1	Q4G079	N-Term(TMT10); K1(TMT10)	0	0.96074	1		0.957342	1		0.971286	1		1.0777	1		0.923257	1		1.15373	1		0.871807	1		0.915436	1		1.16327	1		0	1.545e-14	101.98	1.48959e-09	3	2755.44	1.72331	68.6045	1
High	gGVSAVAGGVTAVGSAVVNk	2	1	1	B2RZ08	N-Term(TMT10); K20(TMT10)	0	1.00941	2	0.797548	1.07822	2	2.02807	0.966724	2	4.49047	1.03372	2	3.93389	0.930936	2	4.72508	1.02478	2	0.956196	0.906136	2	1.48337	0.929462	2	0.243721	1.18556	2	16.7519	0	2.951e-16	101.97	1.85199e-09	2	2158.26	1.41207	84.831	0
High	tGENVEDAFLEAAk	3	2	1	B0BMW0	N-Term(TMT10); K14(TMT10)	0	0.957981	3	2.57038	0.949838	3	0.54763	1.06142	3	2.93044	0.979217	3	1.27915	1.07377	3	1.51092	0.997115	3	2.8648	1.09859	3	0.529697	1.0398	3	3.92864	0.850384	3	8.0464	0	7.964e-12	101.95	1.69778e-09	2	1952.04	1.05901	85.5178	0
High	aGPESDGQFQFTGIk	5	1	1	Q9JJW3	N-Term(TMT10); K15(TMT10)	0	0.891911	5	7.15633	0.915683	5	6.14836	1.02248	5	3.70018	1.03414	5	0.429501	0.993627	5	5.17512	1.0713	5	2.94271	1.04941	5	0.475197	1.00806	5	1.92485	0.959998	5	10.1686	0	1.137e-12	101.94	1.25068e-09	2	2040.08	0.989024	79.5059	0
High	eNVNATENcISAVGk	2	2	1	D4A781	N-Term(TMT10); C9(Carbamidomethyl); K15(TMT10)	0	0.920478	2	0.603159	0.956989	2	13.5283	1.05147	2	7.19337	1.08527	2	8.78185	0.931058	2	6.7444	1.10242	2	2.14039	0.986244	2	5.89292	0.964332	2	2.19426	0.927939	2	12.582	0	5.228e-13	101.76	1.58033e-09	2	2064.08	1.17706	63.2664	0
High	tDEFQLHTNVNDGTEFGGSIYQk	3	1	1	Q9Z2L0	N-Term(TMT10); K23(TMT10)	0	1.01168	3	5.96922	1.02743	3	0.955075	0.947686	3	1.18523	1.02002	3	4.11081	0.957041	3	5.79731	1.03621	3	1.05296	0.979078	3	0.516704	0.970205	3	2.0303	1.09996	3	4.20725	0	1.774e-14	101.72	1.13733e-09	3	3058.52	-0.0605236	80.0534	0
High	gIAAQPLFTGYcNYENk	2	2	1	Q6AXR4	N-Term(TMT10); C12(Carbamidomethyl); K17(TMT10)	0	1.06435	2	4.69673	1.10362	2	11.9649	0.943982	2	9.08078	1.02204	2	5.64852	0.927533	2	7.93686	1.07031	2	1.70084	0.858923	2	10.0136	0.888976	2	5.00403	1.1954	2	6.85163	0	2.076e-14	101.71	1.47722e-09	2	2404.24	-0.913735	83.4261	0
High	sVLDSEDEIEELSk	1	3	1	A0JPQ9	N-Term(TMT10); K14(TMT10)	0	0.991702	1		0.980359	1		1.00016	1		1.03346	1		0.973454	1		1.06361	1		0.956956	1		1.03592	1		0.960534	1		0	1.64e-11	101.59	1.80637e-09	2	2051.09	2.94754	84.9308	0
High	vLHEAEGHIVTcETNTGEVYR	5	1	1	M0R907	N-Term(TMT10); C12(Carbamidomethyl)	0	1.06489	5	6.20564	0.90173	5	4.33112	1.02765	5	1.70447	0.977795	5	8.77665	0.890201	5	3.1793	1.01363	5	5.57995	0.933268	5	1.87971	1.00706	5	11.3562	1.1926	5	5.13412	0	6.818e-14	101.59	1.00893e-09	2	2643.31	1.10724	60.978	0
High	tLTLVDTGIGMTk	20	4	2	P34058;P82995	N-Term(TMT10); K13(TMT10)	0																												0	2.704e-10	101.58	2.05032e-09	2	1808.06	1.71944	86.6335	0
High	aAAEVNQEYGLDPk	2	1	1	P14408	N-Term(TMT10); K14(TMT10)	0	1.05337	2	3.50235	1.03215	2	12.3139	0.98602	2	3.11483	1.01258	2	1.52759	0.960944	2	10.6355	1.00915	2	5.22899	0.957178	2	10.8778	0.924542	2	7.43519	1.11807	2	9.97712	0	2.206e-11	101.48	1.99851e-09	2	1963.06	0.752949	65.1493	0
High	sENGLEFTSSGSANTETTk	4	1	1	Q9Z2L0	N-Term(TMT10); K19(TMT10)	0	0.945884	4	12.8496	0.930116	4	2.86661	0.912233	4	0.63904	0.938281	4	1.78536	1.15514	4	4.1604	0.931816	4	0.910019	1.13127	4	6.11417	1.13941	4	5.3508	0.956619	4	11.0966	0	3.777e-16	101.48	1.06326e-09	2	2418.21	1.38679	64.8565	0
High	lTLYDIAHTPGVAADLSHIETR	4	2	1	P04636	N-Term(TMT10)	0	1.02449	4	4.44319	0.946692	4	1.67181	0.917267	4	1.22819	1.05423	4	4.32051	0.940262	4	5.6228	1.12768	4	3.94327	0.932419	4	6.26277	1.05162	4	4.0442	1.05661	4	4.27738	0	2.078e-11	101.41	2.39237e-09	4	2622.41	2.0882	87.9219	0
High	nIDNPAVADIYTEHAHQVVVAk	3	1	1	Q5RKI0	N-Term(TMT10); K22(TMT10)	0	0.888214	3	0.912714	0.960472	3	3.47932	1.00906	3	1.14378	0.989528	3	3.23737	1.02476	3	5.04683	1.07187	3	3.65028	1.03791	3	1.41328	1.00125	3	0.397757	0.986774	3	6.31551	0	7.334e-16	101.31	2.26689e-09	3	2862.55	0.697157	73.0354	0
High	dIVVQETMEDIDk	3	2	2	G3V6S3;Q3MID6	N-Term(TMT10); K13(TMT10)	0																												0	2.933e-10	101.25	1.89348e-09	2	1993.06	1.58179	85.0763	0
High	eIVHLQAGQcGNQIGAk	18	8	3	Q6P9T8;P85108;P69897	N-Term(TMT10); C10(Carbamidomethyl); K17(TMT10)	0																												0	2.385e-10	101.24	2.29997e-09	3	2281.25	1.74967	60.9185	0
High	lAEDQPTDAETSAQAAAGASLk	6	1	1	F1LUD3	N-Term(TMT10); K22(TMT10)	0	0.969502	6	1.23569	1.01247	6	2.58072	0.965769	6	2.99424	1.02496	6	1.41775	0.993908	6	1.41665	1.05108	6	2.45585	0.983754	6	1.18658	1.00537	6	4.2269	1.05068	6	4.45092	0	9.062e-17	101.19	1.79057e-09	2	2603.35	-2.09479	72.9511	0
High	nLAMGVNLTSMSk	4	1	1	P04961	N-Term(TMT10); K13(TMT10)	0	1.256	4	7.70897	1.24512	4	1.96465	0.930708	4	6.78906	0.882469	4	2.5734	0.976024	4	2.65902	0.827661	4	3.93466	0.996378	4	3.7142	0.946716	4	2.42952	1.2357	4	6.04112	0	5.769e-11	101.09	2.5753e-09	2	1824.01	0.910292	82.5063	0
High	aQEGGGSEVFQELk	1	1	1	Q5FWT1	N-Term(TMT10); K14(TMT10)	0	0.999923	1		1.01725	1		0.971483	1		1.06133	1		0.974682	1		1.0529	1		0.949084	1		0.964911	1		1.02816	1		0	4.781e-12	101.06	2.37379e-09	2	1937.05	3.79571	74.7141	0
High	sISIIDSPGILSGEk	2	1	1	Q8R3Z7	N-Term(TMT10); K15(TMT10)	0	1.18058	2	5.16889	1.14833	2	1.65348	0.923534	2	0.27642	0.957211	2	3.49793	0.919488	2	4.00741	0.986965	2	5.10143	0.956326	2	0.351156	0.946395	2	0.903811	1.12584	2	2.73393	0	1.714e-12	101.04	2.39655e-09	2	1974.16	1.78612	86.5699	0
High	eGSTAQLIINTEk	3	2	1	A0A0G2JWD6	N-Term(TMT10); K13(TMT10)	0	1.03427	3	0.529615	1.01731	3	3.91084	1.00002	3	0.401494	1.01487	3	3.60119	0.972013	3	1.67081	1.02122	3	2.43605	1.00244	3	0.0894698	0.991552	3	3.2579	0.974768	3	4.63221	0	5.585e-11	101.02	2.68831e-09	2	1862.07	1.677	72.4864	0
High	kPELPDGDNDDDVIADISNR	2	2	1	E9PU64	N-Term(TMT10); K1(TMT10)	0	0.908049	2	6.28732	0.929258	2	7.47878	1.05786	2	3.28639	1.09624	2	1.46577	0.916384	2	10.8313	1.15469	2	2.37085	0.911433	2	8.242	0.909757	2	7.74363	1.03919	2	9.51231	0	5.49e-15	101.02	1.5695e-09	3	2656.35	1.22892	79.7887	0
High	eIVSFGSGYGGNSLLGk	1	2	1	B2RYG2	N-Term(TMT10); K17(TMT10)	0	0.606545	1		0.637646	1		1.05646	1		1.20234	1		1.03597	1		1.30717	1		1.03106	1		1.10765	1		0.722003	1		0	9.019e-14	101	2.25986e-09	2	2143.18	1.23624	86.603	0
High	dMAPLPESEVALGk	3	2	2	A0A0G2JW88;Q5M7W5	N-Term(TMT10); K14(TMT10)	0																												0	2.731e-11	100.96	2.26875e-09	2	1915.06	1.23174	79.9409	0
High	aLAAAQTQVAEYk	2	2	1	D3ZM57	N-Term(TMT10); K13(TMT10)	0	1.11249	2	3.79993	1.14845	2	0.604973	0.920391	2	0.0778864	0.990717	2	0.713304	0.929338	2	4.0858	1.00294	2	1.86159	0.895344	2	1.21267	0.921965	2	4.63936	1.21442	2	1.01748	0	1.327e-10	100.84	2.5301e-09	2	1822.05	1.88009	72.0664	0
High	gDQENVHPDVMLVQPR	2	2	1	F2Z3Q8	N-Term(TMT10)	0	1.0442	2	7.53881	0.990341	2	2.12335	0.985106	2	7.45333	0.94964	2	10.5129	0.994659	2	5.45179	0.997333	2	3.75715	1.03704	2	7.46119	1.00297	2	2.99039	1.0552	2	0.390034	0	5.431e-14	100.8	1.44727e-09	2	2063.05	0.36157	61.2773	0
High	tAPYVVTGSVDQTVk	3	1	1	P63004	N-Term(TMT10); K15(TMT10)	0	0.955478	3	0.182008	0.969839	3	6.13953	1.05979	3	0.760079	1.0129	3	1.31946	1.07541	3	1.7715	1.02236	3	2.5376	1.00236	3	1.04761	0.982924	3	0.687243	0.938072	3	0.110278	0	9.387e-13	100.77	2.65497e-09	2	2023.15	0.601048	69.408	0
High	vTGQNQEQFLLLAk	2	2	1	G3V8Z9	N-Term(TMT10); K14(TMT10)	0	0.916939	2	2.80137	0.960772	2	5.43092	1.03227	2	4.7542	1.05699	2	0.452054	1.00996	2	4.19541	1.00644	2	0.287383	1.05794	2	6.08743	1.01374	2	3.69849	0.912483	2	9.03448	0	3.549e-11	100.76	2.58554e-09	2	2047.2	2.07366	86.4961	0
High	qASPNIVIALAGNk	1	1	1	B0BNK1	N-Term(TMT10); K14(TMT10)	0	1.09089	1		1.05675	1		1.01412	1		1.01556	1		0.935744	1		1.00127	1		0.916249	1		0.933738	1		1.10529	1		0	1.185e-09	100.61	1.88999e-09	2	1854.12	0.334682	83.5963	0
High	qIGENLIVPGGVk	2	2	1	P47942	N-Term(TMT10); K13(TMT10)	0	1.23125	2	3.26191	1.21396	2	0.981623	0.925614	2	0.312349	0.93693	2	2.992	0.967544	2	1.41847	0.91556	2	0.904973	0.925386	2	6.9014	0.908408	2	8.38231	1.16946	2	6.48579	0	4.948e-08	100.6	1.36741e-09	2	1782.09	2.61503	81.3035	0
High	vDYGGVTVDELGk	8	1	1	P31044	N-Term(TMT10); K13(TMT10)	0	1.03605	7	8.13861	1.0717	7	4.20958	0.966784	7	2.15843	1.05413	7	3.44216	0.910171	7	2.92902	1.0227	7	3.91665	0.935961	7	6.98943	0.89943	7	7.69988	1.06015	7	11.4891	0	1.019e-10	100.58	2.65558e-09	2	1810	1.01728	79.0953	0
High	vLQATVVAVGSGGk	7	3	1	A0A0G2JTG1	N-Term(TMT10); K14(TMT10)	0	1.01249	7	4.72348	1.02263	7	2.98646	0.98712	7	2.26313	0.999282	7	4.13607	1.07233	7	2.01575	0.968139	7	4.62534	0.987762	7	4.49286	1.01885	7	3.70991	0.951427	7	6.09726	0	4.011e-10	100.57	1.96448e-09	2	1744.08	1.91646	78.718	0
High	lSQALGNITIVQk	1	2	1	D4AAT7	N-Term(TMT10); K13(TMT10)	0	0.744394	1		0.724919	1		1.18775	1		1.10045	1		1.05237	1		1.10592	1		1.0876	1		0.998884	1		0.801544	1		0	6.33e-11	100.56	1.63938e-09	2	1843.14	1.65895	85.5525	0
High	qVQSLTcEVDALk	10	2	1	P31000	N-Term(TMT10); C7(Carbamidomethyl); K13(TMT10)	0	1.02759	10	4.27112	1.10505	10	8.54386	0.976725	10	5.91207	1.00727	10	4.6322	0.978114	10	4.18417	0.977	10	8.16523	0.9755	10	2.38411	0.951693	10	8.27248	1.06039	10	9.9748	0	4.433e-10	100.56	3.08976e-09	2	1949.08	1.16795	82.3674	0
High	aADEEAFEDNSEEYIR	2	1	1	D3ZPR0	N-Term(TMT10)	0	1.17116	2	4.17039	1.12643	2	1.00781	0.936398	2	0.657845	1.02867	2	0.43723	0.899644	2	3.19399	1.02681	2	1.23307	0.85443	2	1.38038	0.927701	2	2.55355	1.14116	2	3.54144	0	5.958e-14	100.46	1.70905e-10	2	2116.95	0.716538	72.424	0
High	vPDVDISSPGVNVEAPDIHVk	5	2	1	A0A0G2JUA5	N-Term(TMT10); K21(TMT10)	0	1.17595	5	8.73895	1.20614	5	3.92201	0.901568	5	4.85369	1.00168	5	1.19973	0.928692	5	4.45358	0.973293	5	3.02464	0.911922	5	9.38162	0.917231	5	5.54844	1.23639	5	11.2758	0	1.594e-09	100.45	2.70922e-09	3	2645.46	1.75648	81.9541	0
High	sLEETQLALSSDLk	2	1	1	D3ZH41	N-Term(TMT10); K14(TMT10)	0	1.04046	2	0.3949	1.09831	2	2.26641	0.96774	2	2.17221	0.985658	2	4.03273	0.963407	2	1.90439	1.06596	2	3.82626	0.943472	2	3.99704	0.92434	2	4.88008	1.07236	2	3.66755	0	2.485e-11	100.44	3.17633e-09	2	1992.13	1.43908	85.5287	0
High	eGATVIDVGINR	1	1	1	D4A1Y5	N-Term(TMT10)	0	0.608186	1		0.61598	1		1.14865	1		1.16198	1		1.08092	1		1.18189	1		1.18042	1		1.10635	1		0.620389	1		0	1.864e-09	100.4	2.64483e-09	2	1472.83	0.815688	68.7121	0
High	aAPTEPAEAPEATAAGGVASk	2	1	1	Q4KLZ6	N-Term(TMT10); K21(TMT10)	0	1.06611	2	3.61336	1.10847	2	4.0201	0.951166	2	0.848052	1.0041	2	3.30535	0.935158	2	2.82199	0.988132	2	3.87973	0.921427	2	0.0975702	0.956857	2	0.134932	1.17424	2	2.5047	0	1.914e-14	100.39	2.76976e-09	2	2354.26	0.436191	59.6405	0
High	aEQLGAEGNVDESQk	2	2	1	A0A0G2QBZ8	N-Term(TMT10); K15(TMT10)	0	1.02351	2	4.7305	0.992602	2	3.21347	0.990979	2	5.5526	0.990759	2	0.875688	0.999524	2	6.17914	1.02214	2	0.948561	0.965516	2	0.422787	0.971826	2	2.53525	1.08965	2	4.36635	0	8.57e-14	100.36	1.98357e-09	2	2033.06	1.56508	56.2079	0
High	gFGFVDFNSEEDAk	4	4	1	P13383	N-Term(TMT10); K14(TMT10)	0	0.886293	4	4.45533	0.927517	4	3.14236	1.01427	4	1.83942	1.07893	4	0.165561	1.04132	4	2.11342	1.08435	4	4.14196	0.999761	4	3.38654	0.97417	4	1.57403	0.925467	4	4.11783	0	1.125e-11	100.33	1.38098e-09	2	2020.01	2.07544	87.5001	0
High	qIATLHAQVTDMk	5	2	1	G3V6P7	N-Term(TMT10); K13(TMT10)	0	0.992308	5	3.44874	1.0037	5	1.72878	0.976348	5	5.28631	1.05149	5	1.73034	0.982275	5	3.84069	1.0261	5	3.34094	0.97924	5	6.34597	0.976044	5	1.21711	1.03694	5	0.16465	0	7.751e-11	100.27	2.76279e-09	2	1914.09	1.69534	67.0097	0
High	cNLDGSELEVIDTMR	2	1	1	G3V928	N-Term(TMT10); C1(Carbamidomethyl)	0	0.863255	2	3.39965	0.839595	2	7.95917	1.07601	2	1.81215	0.991938	2	0.322873	1.09339	2	3.22952	0.966862	2	1.14615	1.1704	2	2.67286	1.14454	2	0.925908	0.785159	2	1.71173	0	1.032e-12	100.22	7.08201e-10	2	1980.96	0.897779	85.5122	0
High	lVTPGSANETSSILVESVTR	2	2	1	D4A8D5	N-Term(TMT10)	0	0.924346	2	5.26404	0.923568	2	6.44487	0.978394	2	4.56164	1.03447	2	0.975337	1.02371	2	4.09256	1.10465	2	0.65533	0.980103	2	1.91624	1.06602	2	2.04848	0.924654	2	1.235	0	2.665e-13	100.21	3.00607e-09	2	2289.25	1.61468	86.3781	0
High	sLEDESQETFGPLEk	2	3	1	G3V8F8	N-Term(TMT10); K15(TMT10)	0	1.44172	2	3.16118	1.50294	2	1.14735	0.829316	2	0.984516	0.85707	2	5.41901	0.854551	2	7.58957	0.832635	2	1.88974	0.845642	2	0.0443367	0.818421	2	1.69685	1.40822	2	0.016046	0	4.707e-13	100.15	1.96108e-09	2	2167.12	1.05535	80.7963	0
High	cVGVGESDGSIWNPDGIDPk	4	1	1	P10860	N-Term(TMT10); C1(Carbamidomethyl); K20(TMT10)	0	0.964203	4	3.25988	0.968828	4	3.14489	1.03998	4	2.41829	0.996484	4	1.55641	1.00076	4	2.00413	1.01269	4	2.97022	0.99893	4	1.07023	1.02083	4	0.761039	0.990679	4	3.74763	0	1.197e-13	100.13	1.67413e-09	2	2560.28	1.60112	83.9536	0
High	kVDVDEYDENkFVDEEDGGDGQAGPDEGEVDScLR	2	1	1	Q4KLF8	N-Term(TMT10); K1(TMT10); K11(TMT10); C33(Carbamidomethyl)	0	1.05089	2	6.59394	1.1645	2	1.43608	0.986725	2	6.98604	1.05243	2	5.9905	0.823891	2	4.77986	1.13661	2	0.142454	0.823625	2	1.95357	0.835033	2	3.56532	1.17648	2	8.5017	0	1.909e-20	100.08	4.36878e-10	4	4575.13	1.48331	76.2715	2
High	tGAIVDVPVGDELLGR	4	2	1	F1LP05	N-Term(TMT10)	0	0.930065	4	1.30794	0.885201	4	4.10153	1.03477	4	3.02194	0.938823	4	3.25712	1.199	4	4.81521	0.855853	4	2.14841	1.20025	4	5.92948	1.15135	4	8.71331	0.73945	4	14.2307	0	5.144e-12	100.05	3.17326e-09	2	1840.04	1.5509	86.7074	0
High	gSYGDLGGPIITTQVTIPk	4	3	2	P61980;Q5D059	N-Term(TMT10); K19(TMT10)	0																												0	9.723e-13	100.04	2.96754e-09	2	2375.36	0.811667	86.178	0
High	vNDTIQIDLETGk	5	3	1	X1WI37	N-Term(TMT10); K13(TMT10)	0	0.926214	5	5.24562	0.956908	5	3.0801	1.03982	5	0.677695	1.05632	5	5.45434	1.02038	5	2.53554	1.03482	5	1.01157	0.990426	5	2.57275	1.00585	5	2.4031	0.891375	5	8.35946	0	1.311e-10	99.99	3.37777e-09	2	1904.08	1.02522	81.1172	0
High	iAQLEEQLDNETk	4	2	1	G3V6P7	N-Term(TMT10); K13(TMT10)	0	0.958448	4	1.40589	1.01587	4	6.86403	1.00405	4	1.97451	1.04043	4	1.77338	0.973033	4	2.2754	1.04635	4	0.652532	0.994265	4	1.85689	0.995379	4	1.67206	0.99346	4	4.58779	0	2.559e-10	99.98	2.70242e-09	2	1989.09	1.64512	86.1339	0
High	vSEEAESQQWDTSk	2	6	1	A0A0G2JZY6	N-Term(TMT10); K14(TMT10)	0	1.0236	2	4.86375	1.08418	2	0.148211	0.957797	2	3.88579	0.946683	2	4.2179	1.03754	2	3.69711	1.00179	2	0.122719	0.935961	2	2.38384	0.944129	2	2.30111	1.16849	2	4.14276	0	1.968e-12	99.92	1.36491e-09	2	2082.04	-0.754091	62.1486	0
High	rFDEILEASDGIMVAR	4	1	1	P11980	N-Term(TMT10)	0	1.02862	4	8.76281	1.03588	4	1.8578	0.986175	4	6.64996	0.990656	4	4.91911	0.945645	4	2.44219	1.06286	4	1.17856	0.951406	4	2.7402	0.970639	4	3.87566	1.08413	4	0.379775	0	5.597e-13	99.91	2.6085e-09	2	2051.08	2.01864	87.3628	1
High	aIAGTGANVIVTGGk	2	1	1	D4ACB8	N-Term(TMT10); K15(TMT10)	0	0.892025	2	1.53916	0.933329	2	1.34039	1.04204	2	2.65554	1.06502	2	3.53692	1.02376	2	1.85024	1.0825	2	10.9603	0.963967	2	4.79053	0.988817	2	3.46002	0.943416	2	13.7479	0	2.669e-12	99.81	2.55956e-09	2	1787.08	1.141	68.297	0
High	dLAGcIHGLSNVk	3	1	1	P56574	N-Term(TMT10); C5(Carbamidomethyl); K13(TMT10)	0	1.24075	3	9.33893	1.21291	3	12.2327	0.874608	3	0.530565	1.00975	3	0.167091	0.823015	3	16.4166	1.06934	3	0.901526	0.79091	3	19.568	0.863939	3	14.5548	1.37171	3	19.9347	0	4.798e-11	99.79	3.01743e-09	2	1842.03	1.90553	70.6017	0
High	aAAQLLQSQAQQSGAQQTk	3	2	1	A0A0G2JUL7	N-Term(TMT10); K19(TMT10)	0	1.0323	3	6.69906	1.11167	3	3.31634	0.968138	3	2.03762	0.958814	3	1.37805	0.977749	3	3.96287	0.978932	3	0.972828	1.01418	3	3.30981	1.00152	3	6.63927	1.13888	3	14.6851	0	3.752e-15	99.79	3.3218e-09	2	2415.34	1.74139	63.7243	0
High	qVDTEEAGVVTAATASNVk	1	3	1	F1SW39	N-Term(TMT10); K19(TMT10)	0	1.1213	1		1.19692	1		0.930857	1		0.946747	1		0.974489	1		0.958426	1		0.931232	1		0.918411	1		1.18283	1		0	3.425e-14	99.76	3.29727e-09	2	2348.27	-0.100392	71.6187	0
High	sSGLPITSAVDLEDAAk	1	5	1	Q5EBA9	N-Term(TMT10); K17(TMT10)	0	0.827345	1		0.875082	1		1.03736	1		0.989942	1		1.09759	1		1.06898	1		1.1255	1		1.09067	1		0.807929	1		0	2.907e-13	99.75	3.41609e-09	2	2132.19	1.22711	84.7653	0
High	vAQSLcGEDLIIk	3	1	1	I6L9G6	N-Term(TMT10); C6(Carbamidomethyl); K13(TMT10)	0	1.05178	3	5.74194	1.11044	3	6.44673	1.01319	3	0.0174075	0.981707	3	6.61983	0.953133	3	11.0948	1.01283	3	3.45613	0.934622	3	3.35665	0.918491	3	1.93782	1.09331	3	1.11445	0	2.351e-10	99.72	3.75442e-09	2	1904.1	2.20164	84.6855	0
High	lPSGSGAASPTTGSAVDIR	2	2	1	A0A0G2JUA5	N-Term(TMT10)	0	1.15915	2	28.7393	1.15338	2	33.2613	0.973144	2	13.0223	0.993459	2	9.64043	0.920983	2	24.3237	0.974156	2	6.00944	0.888918	2	6.83848	0.878991	2	30.0866	1.07055	2	36.376	0	8.805e-12	99.72	2.15452e-09	2	1973.05	1.49762	62.977	0
High	tSVQTEDDQLIAGQSAR	2	3	1	Q5U302	N-Term(TMT10)	0	1.06692	2	8.19923	0.993691	2	5.93513	1.01545	2	0.941245	0.911098	2	4.31787	1.02807	2	2.82374	0.890989	2	4.61391	1.07401	2	7.35499	1.13123	2	8.09977	0.964379	2	1.41207	0	2.549e-13	99.69	1.72375e-09	2	2048.05	0.536755	59.3875	0
High	dISSSLNSLADSNAR	1	1	1	B2GV01	N-Term(TMT10)	0	1.10024	1		1.01496	1		0.956338	1		1.00755	1		1.02131	1		0.973344	1		0.95698	1		0.985667	1		1.06555	1		0	3.077e-12	99.66	1.47616e-09	2	1778.91	2.33166	73.5599	0
High	gGVTGSPEASVSGSk	4	2	1	A0A0G2JUA5	N-Term(TMT10); K15(TMT10)	0	1.22934	4	4.66691	1.14929	4	5.07318	0.910938	4	4.17701	0.937598	4	1.48946	0.948049	4	0.615007	0.957664	4	1.77179	0.886522	4	4.72826	0.904089	4	8.1454	1.29812	4	1.3785	0	7.79e-10	99.61	3.0412e-09	2	1777.97	1.97238	54.4039	0
High	aDLINNLGTIAk	5	4	2	P34058;P82995	N-Term(TMT10); K12(TMT10)	0																												0	1.223e-08	99.6	2.54931e-09	2	1701.03	1.16009	86.2861	0
High	aVPVSPSAVEEDEDEDGHTVVATAR	1	2	1	A0A0G2K2P5	N-Term(TMT10)	0	1.00428	1		0.978407	1		0.969107	1		1.00731	1		0.9783	1		1.04525	1		1.12241	1		0.908735	1		1.01401	1		0	4.693e-14	99.52	1.32907e-09	3	2809.37	1.43012	68.2042	0
High	gLAVTFVSDENDAk	1	1	1	Q5U216	N-Term(TMT10); K14(TMT10)	0	1.10501	1		1.08465	1		0.911284	1		0.918541	1		1.01465	1		0.944137	1		0.956041	1		1.03752	1		1.18137	1		0	9.385e-12	99.51	3.01689e-09	2	1924.04	0.781594	80.255	0
High	mTVDESGQLVScSMDDTVR	3	1	1	Q5RKI0	N-Term(TMT10); C12(Carbamidomethyl)	0	0.907385	3	0.859565	0.941155	3	0.420327	1.05718	3	0.334844	1.03108	3	5.93523	1.05288	3	3.87775	1.0266	3	0.566051	1.0617	3	7.72952	1.04876	3	1.43937	0.885744	3	0.975917	0	1.385e-13	99.49	3.87989e-10	2	2359.08	1.07778	80.0565	0
High	vDTDIPQVDVHGPNLk	5	2	1	A0A0G2JUA5	N-Term(TMT10); K16(TMT10)	0	1.1232	5	4.46303	1.199	5	6.22476	0.953353	5	1.21694	0.960259	5	2.97087	0.95609	5	2.41169	0.949012	5	5.79045	0.945849	5	1.14198	0.908183	5	2.1045	1.16142	5	1.41906	0	6.367e-12	99.48	3.97337e-09	2	2205.23	1.90004	74.2743	0
High	eQQIVIQSSGGLSk	7	2	1	F1M953	N-Term(TMT10); K14(TMT10)	0	0.735103	7	9.5118	0.796168	7	11.3136	1.09725	7	3.9274	1.11337	7	5.79284	1.02573	7	3.3553	1.11485	7	4.3021	1.0546	7	6.97238	1.05934	7	3.45036	0.837476	7	17.5973	0	6.45e-11	99.41	3.40217e-09	2	1932.12	2.2483	68.2538	0
High	aWGPGLEGGIVGk	2	1	1	C0JPT7	N-Term(TMT10); K13(TMT10)	0	1.04386	2	0.0643001	1.0306	2	6.8515	0.984538	2	4.16114	1.03342	2	1.7321	0.971591	2	2.45105	1.03154	2	0.411009	0.920846	2	2.09449	0.923634	2	3.09561	1.11053	2	4.77963	0	2.949e-10	99.39	3.17046e-09	2	1699	1.31509	81.9937	0
High	lGEINITGEPFLNVNcEHIk	1	1	1	G3V681	N-Term(TMT10); C16(Carbamidomethyl); K20(TMT10)	0	1.37348	1		1.39619	1		0.900798	1		0.896534	1		0.78073	1		0.928602	1		0.773068	1		0.819999	1		1.44494	1		0	2.279e-13	99.39	3.17046e-09	3	2755.49	1.69702	87.8749	0
High	lGEYGFQNAILVR	2	1	1	A0A0G2JSH5	N-Term(TMT10)	0	0.808006	2	1.99413	0.81991	2	4.77922	1.04432	2	0.59856	1.04294	2	1.19222	1.09916	2	3.52465	1.07221	2	0.618015	1.10391	2	4.90067	1.13028	2	1.64341	0.761577	2	6.10012	0	9.181e-11	99.37	3.39319e-09	2	1708.96	1.20747	86.8975	0
High	emEENFALEAANYQDTIGR	4	2	1	P31000	N-Term(TMT10); M2(Oxidation)	0	0.974578	4	0.797219	0.927297	4	5.44159	0.917906	4	6.72249	0.948114	4	2.56652	1.05149	4	4.70151	1.01482	4	3.96916	1.04175	4	3.33079	1.13156	4	0.954722	1.05703	4	4.0847	0	4.292e-12	99.35	4.58772e-10	2	2446.14	0.583956	82.2616	0
High	lEGYVVLGDQDVAAk	1	1	1	F1LUD3	N-Term(TMT10); K15(TMT10)	0	1.00011	1		1.02211	1		0.915637	1		0.996367	1		1.02299	1		1.0659	1		0.965555	1		1.03614	1		1.02029	1		0	2.191e-12	99.26	3.66995e-09	2	2035.15	1.24747	84.5654	0
High	gAEAANVTGPGGVPVQGSk	3	4	1	P62961	N-Term(TMT10); K19(TMT10)	0	1.05563	3	0.483354	1.03061	3	3.24675	0.942551	3	3.64865	1.03033	3	0.618243	1.01004	3	4.19986	1.07011	3	1.20243	0.972717	3	4.58434	0.929188	3	4.33744	1.09883	3	0.942786	0	2.286e-10	99.26	4.26284e-09	3	2154.19	1.21109	58.6731	0
High	aIVAIENPADVSVISSR	4	1	1	P38983	N-Term(TMT10)	0	0.992657	4	6.94297	0.932854	4	7.51721	0.992841	4	1.94402	1.03392	4	2.37433	1.00434	4	5.02607	1.06018	4	3.17778	0.995171	4	2.64992	1.00947	4	3.8978	1.01908	4	3.97992	0	1.059e-11	99.22	3.37481e-09	2	1970.11	1.44787	84.2405	0
High	iHFPLATYAPVISAEk	8	6	3	P68370;Q5XIF6;A0A0H2UHM7	N-Term(TMT10); K16(TMT10)	0																												0	3.662e-13	99.2	3.23409e-09	2	2215.29	1.73839	87.0546	0
High	iDQLMIEMDGTENk	2	3	1	M0R5J4	N-Term(TMT10); K14(TMT10)	0	0.961327	2	2.25472	0.946246	2	0.045923	1.02707	2	0.586368	1.02257	2	1.80082	1.06213	2	6.77281	1.01536	2	4.15774	1.02582	2	0.931618	1.02857	2	0.287191	0.890215	2	3.38681	0	1.037e-11	99.15	2.43845e-09	2	2095.08	1.37224	87.8981	0
High	qDLEAEHVEVEDTTLNR	4	1	1	D4A9P7	N-Term(TMT10)	0	0.924356	4	6.22362	0.909477	4	2.40552	1.00907	4	5.92497	0.979879	4	3.46454	1.07345	4	2.83895	0.987514	4	7.58368	1.10425	4	0.944408	1.11823	4	4.73195	0.849813	4	6.49579	0	3.66e-14	99.14	1.63345e-09	2	2227.1	-0.119409	61.6659	0
High	sWQDELAQQAEEGSAR	2	1	1	Q9Z1W6	N-Term(TMT10)	0	1.04858	2	9.99912	0.990579	2	3.33249	1.03294	2	3.02492	0.98411	2	1.74204	1.04019	2	3.42932	1.00099	2	4.50218	1.01414	2	5.72535	1.00197	2	8.9792	0.899024	2	0.341325	0	2.583e-13	99.1	1.08264e-09	2	2033.98	1.94043	75.2283	0
High	nQEDSEVAPScVGDMADNPR	2	2	2	F1LN75;B2GVB4	N-Term(TMT10); C11(Carbamidomethyl)	0																												0	5.224e-12	99.08	1.73033e-10	2	2420.07	0.51851	58.8683	0
High	vcVQTVESGAMTk	3	2	1	P56574	N-Term(TMT10); C2(Carbamidomethyl); K13(TMT10)	0	1.59077	3	1.23327	1.5094	3	8.6573	0.980825	3	0.851028	1.05412	3	1.66986	0.608824	3	7.5838	0.933487	3	0.764355	0.608613	3	16.386	0.59952	3	11.9903	1.44597	3	10.3634	0	1.106e-10	99	3.33615e-09	2	1868.01	1.69667	68.0688	0
High	eQANAVSEAVVSSVNTVATk	3	3	1	A0A0G2K0T6	N-Term(TMT10); K20(TMT10)	0	1.01939	3	3.93981	1.06087	3	4.81581	0.933531	3	1.77812	0.959608	3	6.86812	0.992749	3	5.13135	0.953411	3	0.0725144	1.00881	3	0.0605466	1.04631	3	5.44661	1.06389	3	1.85982	0	2.647e-16	98.91	3.94583e-09	2	2462.36	2.29834	87.9335	0
High	sSHYDELLAAEAR	2	2	1	D4A8Y5	N-Term(TMT10)	0	0.940931	2	6.19775	1.05732	2	15.4657	0.989284	2	4.31063	0.974767	2	11.4385	1.10046	2	0.104792	0.91903	2	10.8341	1.09512	2	0.714224	1.03361	2	3.52181	0.915107	2	21.5951	0	1.673e-10	98.89	2.06595e-09	2	1690.86	2.06732	60.1711	0
High	sSGEIVYcGQVFEk	6	2	1	P62718	N-Term(TMT10); C8(Carbamidomethyl); K14(TMT10)	0	1.00206	6	2.29151	1.01614	6	3.74677	0.992376	6	3.9689	1.02783	6	1.19037	0.972971	6	3.30131	1.04703	6	2.96773	0.968031	6	3.98135	0.978446	6	1.14302	1.02535	6	5.65876	0	2.399e-12	98.87	2.99648e-09	2	2061.08	1.67882	77.2209	0
High	hLAGLGLTEAIDk	9	2	2	P29457;Q5RJR9	N-Term(TMT10); K13(TMT10)	0																												0	3.112e-10	98.85	3.38823e-09	2	1796.07	1.90837	75.004	0
High	fPPGLEAAEQSAEGLGSGk	1	3	1	P34926	N-Term(TMT10); K19(TMT10)	0	0.896187	1		0.832873	1		1.00967	1		1.05901	1		0.996232	1		1.12078	1		1.04056	1		1.02302	1		0.949775	1		0	2.184e-14	98.85	3.66841e-09	2	2303.23	-0.165141	87.1854	0
High	vAGTQAcATETIDTNR	3	2	1	Q5D001	N-Term(TMT10); C7(Carbamidomethyl)	0	0.810734	3	0.518561	0.845723	3	0.319619	1.11318	3	10.9791	1.03125	3	2.8585	1.01836	3	4.00104	1.05472	3	5.18197	1.05636	3	2.6147	1.03898	3	2.4607	0.862238	3	16.8119	0	5.507e-14	98.77	1.7057e-09	2	1936.97	2.8334	56.5443	0
High	lAcGVIGIAQ	1	2	1	Q6LDS4	N-Term(TMT10); C3(Carbamidomethyl)	0	1.07103	1		1.12985	1		1.08961	1		1.01365	1		0.931374	1		0.910773	1		0.93949	1		0.930646	1		1.05792	1		0	7.933e-06	98.59	3.83248e-09	2	1230.71	0.986971	84.6596	0
High	sHMVVSDTLEDFQk	4	3	1	A0A0G2JZI2	N-Term(TMT10); K14(TMT10)	0	0.797435	4	15.8532	0.807564	4	12.4991	1.0665	4	3.9988	1.13087	4	3.04811	1.01822	4	4.89727	1.16367	4	3.51303	1.02065	4	2.91654	0.987376	4	5.21149	0.850638	4	9.50689	0	9.438e-12	98.49	3.56072e-09	2	2094.1	1.65635	75.1886	0
High	cFSIDNPGYEPEVVAVHPGGDTVAVGGSDGNVR	1	1	1	Q5RKI0	N-Term(TMT10); C1(Carbamidomethyl)	0	0.983022	1		0.878774	1		0.959147	1		0.978359	1		1.13373	1		1.03309	1		1.01718	1		1.12334	1		0.890245	1		0	1.148e-14	98.49	1.6494e-09	3	3600.72	0.0183874	81.1272	0
High	tPAAVQELVLDNck	5	1	1	Q9EST6	N-Term(TMT10); C13(Carbamidomethyl); K14(TMT10)	0	1.0174	5	3.14122	1.07942	5	3.01078	0.957297	5	1.66954	0.972699	5	1.76809	0.985612	5	1.02939	1.00062	5	0.566384	1.01225	5	1.50477	0.980175	5	2.42099	1.07619	5	1.50822	0	2.374e-11	98.43	4.78736e-09	2	2016.12	1.98983	84.6491	0
High	mEDGVGcLETAEEAk	5	2	1	G3V6P7	N-Term(TMT10); C7(Carbamidomethyl); K15(TMT10)	0	1.04036	5	3.96437	0.996564	5	11.0424	1.00113	5	1.52775	1.08165	5	4.44231	1.00319	5	2.42654	0.994892	5	1.26701	0.970167	5	8.20302	0.912175	5	4.76031	1.00571	5	0.867655	0	2.001e-12	98.41	1.40606e-09	2	2097.03	1.24839	74.8414	0
High	vNLLSFTGSTQVGk	1	1	1	Q64057	N-Term(TMT10); K14(TMT10)	0	1.05975	1		1.04764	1		1.02678	1		1.03358	1		0.960525	1		0.984708	1		0.968687	1		0.999671	1		0.95168	1		0	1.606e-11	98.4	4.76995e-09	2	1909.12	1.50683	86.9388	0
High	vVAPTISSPVcQEQLVEAGR	4	1	1	G3V852	N-Term(TMT10); C11(Carbamidomethyl)	0	1.1117	4	4.2392	1.0419	4	3.28258	0.929452	4	0.763227	1.01915	4	1.27152	0.95696	4	5.7692	0.982564	4	5.00842	0.942271	4	7.81277	0.986781	4	0.905381	1.09526	4	0.972181	0	8.593e-12	98.33	4.27458e-09	2	2369.27	0.662876	80.1392	0
High	vAVSADPNVPNVIVTR	5	1	1	Q5XI73	N-Term(TMT10)	0	0.973033	5	0.506934	0.949624	5	10.6404	1.03988	5	6.3818	1.03747	5	1.38004	1.06256	5	3.22216	1.00552	5	10.3356	1.00829	5	2.26222	0.986076	5	5.89829	0.894459	5	6.05982	0	2.981e-10	98.22	4.52735e-09	2	1880.08	1.82148	75.4432	0
High	vGLVDEVVPEDQVHSk	1	3	1	A0A0G2K2R2	N-Term(TMT10); K16(TMT10)	0	1.08675	1		1.02204	1		0.936658	1		1.07216	1		0.929046	1		1.01134	1		0.902799	1		0.993777	1		1.11382	1		0	9.242e-11	98.16	4.72018e-09	2	2208.23	0.72019	73.722	0
High	aAEEAFVNDIDESSPGTEWER	1	1	1	Q5PPP1	N-Term(TMT10)	0	1.03551	1		1.06951	1		0.97858	1		1.05536	1		0.927082	1		1.04874	1		0.930951	1		0.961842	1		1.02836	1		0	2.98e-15	98.07	6.6281e-10	2	2581.19	0.742451	86.8628	0
High	qASPNIVIALSGNk	2	1	1	M0RC99	N-Term(TMT10); K14(TMT10)	0	0.94741	2	0.76631	0.939297	2	9.19544	1.04533	2	3.66042	0.994875	2	0.125579	1.0138	2	2.813	1.07185	2	3.30066	1.00688	2	1.73399	1.02208	2	2.06102	0.926014	2	2.03597	0	1.649e-09	98.06	3.70466e-09	2	1870.12	2.66192	80.836	0
High	aIGVLTSGGDAQGMNAAVR	1	3	2	P30835;P47860	N-Term(TMT10)	0																												0	6.911e-14	98.06	3.99384e-09	2	2017.07	0.952689	72.9464	0
High	gENLVSMTVEGPPPk	9	3	1	P17136	N-Term(TMT10); K15(TMT10)	0	1.02926	9	4.15493	1.01366	9	6.48641	0.983666	9	3.87596	1.01809	9	4.86681	0.988428	9	5.54628	1.006	9	3.20884	0.979381	9	6.60262	1.00068	9	4.46625	1.04258	9	8.34448	0	3.668e-12	98.04	5.29997e-09	2	2013.11	1.57815	77.1167	0
High	hPDASVNFSEFSk	2	11	1	D3ZCR3	N-Term(TMT10); K13(TMT10)	0	0.996844	2	5.28152	1.02177	2	0.0950884	0.912349	2	0.667096	1.04098	2	0.204848	0.948823	2	0.189514	1.06252	2	3.27043	0.948223	2	3.74297	0.979711	2	3.58529	1.14268	2	6.76728	0	6.319e-09	97.99	4.24142e-09	2	1923	1.18686	67.9382	0
High	iLTTNTWSSELSk	1	2	1	G3V6C4	N-Term(TMT10); K13(TMT10)	0	0.841885	1		0.854264	1		1.11751	1		1.09473	1		0.953085	1		1.1671	1		1.00372	1		1.02735	1		0.785525	1		0	6.887e-11	97.98	6.05039e-09	2	1938.1	1.96848	85.1209	0
High	eTNLcLSADVSEAR	1	1	1	Q4QQS7	N-Term(TMT10); C5(Carbamidomethyl)	0	1.0167	1		1.05207	1		1.00638	1		1.02031	1		1.00477	1		0.978397	1		0.995661	1		0.978065	1		0.989827	1		0	1.654e-11	97.93	1.57843e-09	2	1793.89	1.77873	68.1049	0
High	aMLSGPGQFAENETNEVNFR	2	2	1	P83941	N-Term(TMT10)	0	0.991802	2	6.74454	1.06152	2	3.4145	0.969207	2	3.10228	1.01114	2	0.81859	0.947324	2	1.33745	1.00296	2	1.27692	0.987151	2	3.88747	0.966258	2	4.14005	1.12761	2	1.02742	0	6.135e-16	97.91	1.6019e-09	2	2440.18	-0.296885	84.0767	0
High	dQAVMISGESGAGk	2	1	1	Q63355	N-Term(TMT10); K14(TMT10)	0	0.973089	2	9.43487	0.985908	2	8.39181	1.02579	2	2.00843	1.00808	2	0.241545	1.0152	2	5.46622	1.00685	2	3.63298	1.04085	2	9.02718	0.995915	2	0.0284191	0.946036	2	10.3597	0	1.829e-11	97.79	4.91538e-09	2	1807.96	1.31974	59.5941	0
High	vSVGTPEVSVEALEGGVk	4	2	1	A0A0G2JUA5	N-Term(TMT10); K18(TMT10)	0	1.2231	4	9.67373	1.23003	4	2.02375	0.91016	4	1.90748	0.936767	4	0.686467	0.925663	4	2.08702	0.92351	4	6.17503	0.921492	4	1.72655	0.941588	4	2.45651	1.16512	4	3.52142	0	3.022e-14	97.77	4.71248e-09	2	2215.26	1.50104	85.2995	0
High	lGSSGLGSASSIQAAVR	1	1	1	A0A0G2JVW5	N-Term(TMT10)	0	0.697853	1		0.756427	1		1.10776	1		1.11397	1		1.09089	1		1.0561	1		1.12322	1		1.12435	1		0.750992	1		0	4.052e-14	97.73	5.4307e-09	2	1790	2.64429	72.5546	0
High	gILAADESTGSIAk	6	2	1	P05065	N-Term(TMT10); K14(TMT10)	0	0.821072	6	10.2262	0.821077	6	8.79138	1.08033	6	1.03521	1.08813	6	1.94447	1.0471	6	11.8084	1.08265	6	3.611	1.05074	6	2.83611	1.02329	6	3.9395	0.850903	6	8.31204	0	8.55e-11	97.72	5.34179e-09	2	1791.03	1.67013	69.5486	0
High	lLGEIAQGNENYAGIAAR	2	2	1	G3V852	N-Term(TMT10)	0	1.02681	2	2.77622	1.02176	2	1.92097	0.951265	2	1.67347	1.00457	2	0.813318	0.961398	2	0.737551	1.04017	2	1.11457	1.00005	2	1.1908	1.00979	2	0.682748	1.03073	2	5.40506	0	2.459e-13	97.72	4.47967e-09	2	2089.12	0.373438	85.575	0
High	dIQPAFSADDIAk	1	1	1	D3ZFP4	N-Term(TMT10); K13(TMT10)	0	1.45547	1		1.49258	1		0.803279	1		0.8659	1		0.843703	1		0.860829	1		0.801731	1		0.848816	1		1.42051	1		0	2.243e-10	97.65	6.13293e-09	2	1849.01	1.56525	78.8066	0
High	aLQEGEGDLSISADR	2	2	2	G3V9K0;B2RYA5	N-Term(TMT10)	0																												0	1.021e-11	97.6	2.84999e-09	2	1789.92	2.44855	67.4959	0
High	nETGGGEGIEVLk	1	2	1	P53812	N-Term(TMT10); K13(TMT10)	0	1.01528	1		0.946637	1		1.02781	1		0.943562	1		1.09093	1		0.950387	1		1.10276	1		1.10482	1		0.834988	1		0	1.044e-10	97.54	4.84543e-09	2	1760.98	1.11734	66.629	0
High	qVSSEcQGEMLDYR	1	2	1	G3V8G5	N-Term(TMT10); C6(Carbamidomethyl)	0	1.15658	1		1.15046	1		1.00179	1		0.905031	1		0.983022	1		0.991225	1		0.933789	1		0.992663	1		0.996726	1		0	6.381e-12	97.46	4.3971e-10	2	1930.88	0.641154	61.1252	0
High	vALSPAGVQALVk	2	1	1	Q5BJZ3	N-Term(TMT10); K13(TMT10)	0	1.12993	2	4.8729	1.09973	2	1.02008	0.968204	2	0.909389	0.960233	2	5.33031	0.990352	2	5.23104	1.00552	2	2.68095	0.920606	2	2.55145	0.909011	2	1.11772	1.12487	2	7.32092	0	1.041e-10	97.41	2.04246e-09	2	1711.09	1.22397	85.1242	0
High	gEGGILINSQGER	1	2	1	Q920L2	N-Term(TMT10)	0	0.945306	1		0.943072	1		0.984924	1		1.07979	1		0.997741	1		1.01459	1		1.01951	1		1.04241	1		0.959486	1		0	8.677e-11	97.4	4.22171e-09	2	1558.84	1.92393	61.3701	0
High	aGALNSNDAFVLk	3	1	1	Q68FP1	N-Term(TMT10); K13(TMT10)	0	1.13256	3	12.0874	1.14457	3	8.12058	0.969593	3	4.43054	1.01763	3	4.80384	0.933291	3	4.64775	0.944705	3	0.963359	0.891281	3	9.38744	0.90415	3	5.5471	1.1958	3	2.32629	0	1.389e-10	97.37	6.1749e-09	2	1778.02	1.62665	80.3178	0
High	dIQENDEEAVQVk	4	4	1	F1LMZ8	N-Term(TMT10); K13(TMT10)	0	1.01465	4	3.37911	1.03598	4	6.76142	0.997929	4	1.74343	0.998	4	3.59202	1.00001	4	2.43855	0.994429	4	3.28497	0.96645	4	0.346954	0.953965	4	3.13657	1.04734	4	2.32063	0	2.572e-11	97.35	4.50069e-09	2	1975.04	2.28909	63.2341	0
High	aVEGcVSASQAATEDGQLLR	2	1	1	G3V852	N-Term(TMT10); C5(Carbamidomethyl)	0	1.14571	2	8.08614	1.08674	2	14.9104	1.01926	2	1.6107	1.04824	2	9.03411	0.851014	2	20.9014	0.985006	2	4.47862	0.91606	2	24.2802	0.873624	2	21.9771	1.10881	2	20.2946	0	2.991e-15	97.34	2.85055e-09	2	2291.15	1.79081	69.3006	0
High	aAVPSGASTGIYEALELR	8	5	3	M0R5J4;P07323;P15429	N-Term(TMT10)	0																												0	8.465e-13	97.31	5.45266e-09	2	2034.11	2.04428	87.7433	0
High	nTNDANScQIIIPQNQVNR	2	2	2	P50399;P50398	N-Term(TMT10); C8(Carbamidomethyl)	0																												0	2.066e-13	97.26	3.07268e-09	2	2428.22	0.160316	60.2422	0
High	tIcAILENYQTEk	3	2	1	Q6P799	N-Term(TMT10); C3(Carbamidomethyl); K13(TMT10)	0	0.961364	3	3.19921	0.973266	3	1.28535	1.11137	3	2.3128	1.10264	3	7.76189	0.86116	3	2.71727	1.15048	3	8.4014	0.910154	3	2.62561	0.885119	3	1.42393	1.02109	3	4.32157	0	4.206e-11	97.12	5.7062e-09	2	2041.11	2.09429	86.6444	0
High	yYTSASGDEMVSLk	7	1	1	P82995	N-Term(TMT10); K14(TMT10)	0	1.09609	7	11.7964	1.07839	7	4.85845	0.919129	7	2.09958	1.01375	7	2.66084	0.935467	7	2.04656	1.04182	7	7.67873	0.92013	7	2.52091	0.956906	7	4.28186	1.13587	7	2.79629	0	7.502e-12	97.08	3.64345e-09	2	2009.04	2.66534	76.0962	0
High	sIEALLEAGQAQDSQASR	4	1	1	F1M853	N-Term(TMT10)	0	0.968889	4	16.4595	1.09194	4	9.80544	0.971939	4	1.7386	1.00258	4	9.61096	1.00971	4	4.59693	0.988562	4	1.80221	0.991813	4	4.89715	1.01307	4	9.35362	0.996177	4	9.12302	0	1.293e-12	97.07	4.555e-09	2	2103.09	1.46392	85.8858	0
High	vSHVLAALQAGNR	2	2	1	G3V852	N-Term(TMT10)	0	0.974538	2	7.94997	1.03271	2	10.2874	1.02989	2	7.12315	0.981391	2	5.56006	1.00464	2	6.2848	0.963979	2	4.36917	0.970926	2	5.36147	0.979766	2	9.159	1.1079	2	8.2753	0	2.126e-09	97.06	6.50386e-09	2	1564.92	2.18647	70.3687	0
High	aMDLAQAGSAVESk	1	1	1	M0R3M8	N-Term(TMT10); K14(TMT10)	0	0.980121	1		0.916643	1		1.0141	1		1.05302	1		0.961991	1		1.0673	1		1.01325	1		1.01034	1		0.957019	1		0	6.248e-12	96.95	5.55051e-09	2	1836	0.673976	72.6455	0
High	lGVTGAEEQALGSk	2	2	2	O08815;G3V7I8	N-Term(TMT10); K14(TMT10)	0																												0	6.776e-12	96.94	6.25113e-09	2	1818.04	1.49136	73.2571	0
High	qQEGEASSQDMTAQVTSPSGk	4	2	1	A0A0H2UHR7	N-Term(TMT10); K21(TMT10)	0	0.979385	4	0.954872	0.987167	4	6.15675	0.97526	4	3.67685	0.960959	4	3.08945	1.07986	4	3.30484	0.96216	4	0.657467	1.05127	4	1.78662	1.00172	4	1.41286	1.02095	4	1.79252	0	2.435e-16	96.94	2.33659e-09	2	2624.29	0.894421	56.9081	0
High	lGGEVScLVAGTk	2	1	1	P13803	N-Term(TMT10); C7(Carbamidomethyl); K13(TMT10)	0	1.01919	2	1.58157	1.00977	2	2.47863	1.09531	2	1.79702	1.10952	2	0.210774	0.884081	2	6.11691	1.13032	2	4.01463	0.865422	2	2.1794	0.87548	2	2.21956	0.955152	2	6.69569	0	1.774e-10	96.92	6.76775e-09	2	1749	1.7833	83.4781	0
High	sITGEDMSDIYVk	2	2	1	D4ACN7	N-Term(TMT10); K13(TMT10)	0	1.06199	2	6.00647	1.03765	2	4.59589	0.966912	2	0.216764	1.0247	2	0.296715	0.955089	2	4.5256	1.04516	2	2.24452	0.943091	2	2.09646	0.956189	2	2.61826	1.05895	2	3.79073	0	1.275e-10	96.75	5.53734e-09	2	1916.01	1.43888	80.3575	0
High	gAPTTSLVSIAVTk	3	1	1	Q64057	N-Term(TMT10); K14(TMT10)	0	1.05339	3	1.47701	1.09905	3	1.51503	0.963984	3	0.607057	1.0206	3	4.38406	0.94604	3	2.42524	1.03395	3	2.00692	0.923534	3	3.33215	0.939026	3	1.67595	1.08077	3	2.8913	0	1.355e-11	96.74	4.61803e-09	2	1803.1	1.58786	81.0461	0
High	eLQELQDSLNAER	1	1	1	F1MA98	N-Term(TMT10)	0	1.01661	1		1.03107	1		0.991576	1		1.02664	1		0.960443	1		1.01015	1		0.98177	1		0.985478	1		1.03659	1		0	1.309e-10	96.73	3.24856e-09	2	1773.92	0.438318	80.1476	0
High	gPGQDPQAALGALGk	2	2	1	Q04462	N-Term(TMT10); K15(TMT10)	0	0.961823	2	2.30953	0.955932	2	7.53369	1.00244	2	1.17488	1.06394	2	1.60595	0.975759	2	0.835203	1.07082	2	0.0772877	0.946866	2	2.09115	0.987375	2	5.38252	1.0192	2	5.99296	0	3.872e-12	96.7	6.43527e-09	2	1838.06	2.15417	75.8516	0
High	tSQFTSSDLESTLEk	2	2	1	F1LM33	N-Term(TMT10); K15(TMT10)	0	0.89783	2	4.36079	0.878422	2	1.87459	1.0414	2	0.336028	1.00367	2	3.82023	1.08305	2	8.6255	0.998419	2	0.143545	1.10036	2	1.3331	1.09245	2	1.35197	0.857201	2	8.50153	0	2.57e-13	96.69	5.49651e-09	2	2131.12	0.738881	80.0269	0
High	eLDMEPYTVAGVAk	1	2	1	D3ZC84	N-Term(TMT10); K14(TMT10)	0	1.11069	1		1.09765	1		0.948178	1		0.998748	1		0.951577	1		0.988658	1		0.958541	1		0.954663	1		1.09432	1		0	1.378e-11	96.65	6.39083e-09	2	1981.08	1.84227	82.131	0
High	hkPVTNQVEcHPYLTQEk	6	7	2	G3V786;Q91W30	N-Term(TMT10); K2(TMT10); C10(Carbamidomethyl); K18(TMT10)	0																												0	1.574e-13	96.58	6.27489e-09	2	2895.58	0.089755	53.5998	0
High	aYEAQTEPVLQYYQk	6	2	1	Q6P2A5	N-Term(TMT10); K15(TMT10)	0	1.00431	6	8.95141	0.996732	6	8.45248	0.931995	6	7.77117	1.10709	6	4.59579	0.89306	6	7.07833	1.13485	6	1.5657	0.908252	6	6.9286	0.942559	6	5.48837	1.13471	6	10.9863	0	4.511e-13	96.54	6.51041e-09	2	2289.22	0.678842	79.372	0
High	sSLQTMESDVYTEVR	3	1	1	D3ZH41	N-Term(TMT10)	0	0.988054	3	0.638485	1.01437	3	2.26622	0.985243	3	2.8669	0.990625	3	0.00662248	1.06029	3	4.45133	0.996805	3	1.47222	1.05587	3	5.07966	1.07204	3	3.74342	0.89681	3	7.95152	0	2.65e-12	96.53	2.30113e-09	2	1973.97	0.986551	83.7443	0
High	eLEVAEGGGQVELER	2	3	1	A0A140TAG9	N-Term(TMT10)	0	0.956363	2	5.44802	0.971645	2	4.00083	1.00799	2	1.89879	1.04159	2	0.483681	0.99862	2	0.451535	1.05437	2	4.70292	0.959476	2	1.3206	0.98403	2	0.69896	1.02111	2	0.577962	0	3.83e-12	96.49	4.6224e-09	2	1843.96	1.33769	68.5714	0
High	tQESGLDTEETQDSQGPLQk	2	3	1	G3V8F8	N-Term(TMT10); K20(TMT10)	0	1.35212	2	5.88494	1.31473	2	4.78255	0.872631	2	6.14083	0.868669	2	1.20207	0.938988	2	1.7341	0.833286	2	8.64572	0.938392	2	1.94072	0.881256	2	2.4014	1.30681	2	6.80711	0	1.523e-12	96.45	3.68005e-09	3	2649.33	1.96253	61.8908	0
High	iQALQQQADDAEDR	4	2	1	P09495	N-Term(TMT10)	0	1.06782	4	0.32458	0.99568	4	1.51141	0.985131	4	0.301487	1.02943	4	2.66983	1.02331	4	4.05049	0.97532	4	5.25759	0.992178	4	4.04272	1.01126	4	0.519229	0.965349	4	2.99078	0	4.245e-11	96.44	3.32535e-09	2	1829.92	1.90812	65.151	0
High	gDVNDNFQGVLQNVR	2	3	1	Q71SA3	N-Term(TMT10)	0	1.27029	2	0.90585	1.32707	2	3.70184	0.88123	2	0.951598	0.915724	2	5.9418	0.882408	2	4.32836	0.909884	2	1.36428	0.84871	2	2.49137	0.853232	2	0.334555	1.38866	2	0.69364	0	3.354e-12	96.38	4.38425e-09	2	1903.98	1.30126	79.2178	0
High	iPSAVGYQPTLATDMGTMQER	4	3	1	G3V6D3	N-Term(TMT10)	0	0.937294	4	3.0895	0.946419	4	4.25836	0.986063	4	1.99505	1.05996	4	3.44035	0.95136	4	1.28396	1.0906	4	1.37075	0.94737	4	7.02007	1.04952	4	3.62717	1.05533	4	4.52161	0	5.943e-12	96.3	4.23133e-09	2	2495.25	0.916148	84.8872	0
High	gPQVSSSVNLDTTk	6	2	1	A0A0G2JUA5	N-Term(TMT10); K14(TMT10)	0	1.18505	6	8.83885	1.20592	6	14.7232	0.934126	6	12.0735	0.947592	6	2.23454	0.916429	6	7.28366	0.980828	6	2.56757	0.927189	6	6.03066	0.881952	6	8.11539	1.19171	6	17.9393	0	1.443e-11	96.28	7.65391e-09	2	1891.06	1.04511	61.4658	0
High	vITNQYNSPTGLYSSENISNFNNAVESk	2	1	1	P52944	N-Term(TMT10); K28(TMT10)	0	0.964007	2	15.1185	1.00197	2	13.0754	0.908218	2	0.0871546	1.00706	2	5.48682	0.939938	2	8.29919	1.05533	2	8.3245	1.03412	2	4.80835	1.01182	2	0.916734	1.11726	2	7.49022	0	6.763e-12	96.28	4.69832e-09	3	3548.79	0.0613118	86.3886	0
High	qTTVSNSQQAYQEAFEISk	4	1	1	P35213	N-Term(TMT10); K19(TMT10)	0	0.988363	4	2.98463	0.979273	4	3.70538	0.951402	4	5.18549	0.960021	4	5.26024	1.04145	4	1.15613	0.977605	4	1.25662	1.04565	4	5.03217	1.05122	4	2.8641	1.02667	4	0.763739	0	1.775e-11	96.26	5.72553e-09	3	2617.35	-0.95532	78.0808	0
High	sETAPAAPAAPAPVEk	2	1	1	M0R7B4	N-Term(TMT10); K16(TMT10)	0	1.35237	2	13.6444	1.33336	2	16.7508	0.878481	2	6.70921	0.846946	2	6.16147	0.898297	2	4.40255	0.86778	2	12.5094	0.913749	2	7.03132	0.889332	2	10.5068	1.304	2	12.8582	0	8.936e-12	96.24	8.12879e-09	2	1965.11	1.15746	57.4407	0
High	cELLYEGPPDDEAAMGIk	6	1	1	P05197	N-Term(TMT10); C1(Carbamidomethyl); K18(TMT10)	0	0.936511	6	3.84562	0.940358	6	1.27336	1.00569	6	2.91357	0.979222	6	3.08637	1.11322	6	1.80843	0.967811	6	4.65377	1.09031	6	4.54676	1.08987	6	5.81152	0.927739	6	5.02322	0	3.737e-10	96.24	4.68238e-09	3	2466.23	1.33283	85.9685	0
High	tASNVEEAFINTAk	4	2	1	F1LP82	N-Term(TMT10); K14(TMT10)	0	0.998624	4	3.41673	0.967292	4	1.14203	0.994509	4	3.15478	1.00875	4	3.12578	1.06846	4	1.74725	0.963611	4	1.89438	1.03165	4	1.27793	1.01031	4	3.99863	0.967415	4	2.92672	0	8.971e-12	96.22	7.41415e-09	2	1953.07	1.68152	82.3356	0
High	fSNQETSVEIGESVR	2	2	1	P09330	N-Term(TMT10)	0	0.946955	2	4.60712	0.94877	2	0.859264	1.018	2	1.79525	0.952512	2	2.67641	1.10834	2	4.11015	0.942518	2	3.54184	1.1165	2	4.01235	1.11787	2	0.581712	0.857026	2	1.98603	0	1.009e-12	96.21	3.37458e-09	2	1910.97	2.28526	67.9399	0
High	aMLEAQQEALEQLk	1	1	1	P83565	N-Term(TMT10); K14(TMT10)	0	0.930698	1		0.972957	1		1.05254	1		0.996366	1		0.957224	1		1.02831	1		1.04557	1		1.0613	1		0.938256	1		0	4.162e-12	96.19	7.74205e-09	2	2060.15	2.01584	87.1473	0
High	dSLLQDGEFTMDLR	1	1	1	P62963	N-Term(TMT10)	0	1.03577	1		1.05122	1		0.992248	1		1.06907	1		0.93613	1		1.05855	1		0.963591	1		0.976332	1		0.923322	1		0	3.352e-11	96.18	3.15698e-09	2	1868.93	2.00432	87.8087	0
High	eILGTAQSVGcNVDGR	4	4	1	P23358	N-Term(TMT10); C11(Carbamidomethyl)	0	1.03289	4	2.78299	1.05357	4	1.70439	0.991787	4	2.89937	1.01187	4	7.02813	0.964543	4	3.95153	1.04163	4	0.994638	0.954681	4	2.04376	0.933905	4	6.50529	1.042	4	4.46157	0	3.883e-13	96.18	4.19324e-09	2	1904.97	1.38186	65.761	0
High	vDATEESDLAQQYGVR	9	1	1	P04785	N-Term(TMT10)	0	0.963807	9	6.88831	0.988133	9	1.79966	0.984213	9	5.16647	1.01109	9	1.9365	1.02427	9	3.56653	1.00998	9	9.37665	1.01134	9	6.66076	1.01124	9	4.46688	0.997459	9	5.23589	0	5.768e-12	96.15	3.66418e-09	2	2010	1.54169	73.9601	0
High	vQASLAANTFTITGHAETk	2	2	1	M0R5M7	N-Term(TMT10); K19(TMT10)	0	1.06031	2	0.47572	1.17817	2	0.485245	0.856613	2	1.42523	0.975524	2	0.227716	0.874114	2	5.35944	1.09806	2	1.17514	0.922291	2	1.18161	0.869651	2	1.83587	1.30734	2	5.76919	0	8.316e-14	96.14	8.06276e-09	3	2418.34	1.46975	74.4679	0
High	vIGLSSDLQQVGGASAR	3	1	1	D4AC36	N-Term(TMT10)	0	0.926389	3	3.83282	0.869726	3	4.19597	1.03316	3	0.265824	1.00129	3	0.3287	1.0332	3	2.21574	1.0242	3	5.04479	1.03109	3	0.596401	1.03414	3	7.40399	0.966312	3	10.5498	0	7.801e-14	96.13	7.30124e-09	2	1887.05	0.548766	78.4995	0
High	eTLLNSATTSLNSk	3	1	1	Q7TPB1	N-Term(TMT10); K14(TMT10)	0	0.906011	3	2.47949	0.920176	3	6.755	1.02366	3	0.110361	1.01684	3	3.82103	1.06769	3	0.650121	1.03091	3	2.36073	1.02626	3	0.58699	1.0486	3	6.0742	0.904172	3	11.3094	0	1.761e-11	96.12	7.64794e-09	2	1937.1	3.42013	76.9761	0
High	vIPAADLSQQISTAGTEASGTGNMk	1	2	1	P53534	N-Term(TMT10); K25(TMT10)	0	0.939187	1		0.975407	1		0.957627	1		1.03171	1		1.01329	1		1.05098	1		0.999028	1		1.02581	1		1.01652	1		0	5.876e-14	96.01	6.91686e-09	3	2905.54	0.370731	84.0958	0
High	aSLYNAVTTEDVEk	3	5	1	Q80YG1	N-Term(TMT10); K14(TMT10)	0	0.838917	3	5.67541	0.84466	3	2.93706	1.02064	3	2.20926	1.09556	3	3.92807	1.01572	3	3.31841	1.10158	3	4.08315	1.03601	3	0.335429	1.05674	3	1.30208	0.920232	3	0.0500341	0	1.544e-11	95.93	7.49218e-09	2	1998.08	1.35514	76.0051	0
High	dLYANTVLSGGTTmYPGIADR	4	5	1	P60711	N-Term(TMT10); M14(Oxidation)	0	0.980109	4	3.41864	0.916977	4	5.27216	0.9426	4	6.4558	0.987245	4	4.04171	1.04166	4	8.20119	1.00778	4	5.04297	1.06588	4	3.90911	1.1038	4	7.27219	1.00123	4	2.93358	0	6.314e-11	95.93	4.4417e-09	2	2460.23	1.46109	83.1382	0
High	vFTAIANQPWAQk	1	2	1	G3V8G2	N-Term(TMT10); K13(TMT10)	0	1.01965	1		1.01137	1		1.03268	1		1.05029	1		0.988219	1		1.01469	1		1.01193	1		0.940542	1		0.93451	1		0	1.052e-10	95.92	7.2408e-09	2	1932.11	2.06426	87.2168	0
High	vIISAPSADAPMFVmGVNHEk	7	5	2	P04797;M0R660	N-Term(TMT10); M15(Oxidation); K21(TMT10)	0																												0	2.561e-11	95.9	7.95537e-09	2	2687.43	0.542497	83.154	0
High	lLATEQEDAAVAk	1	1	1	F1M853	N-Term(TMT10); K13(TMT10)	0	1.09262	1		1.09905	1		0.957971	1		0.995779	1		0.970342	1		0.957688	1		1.00109	1		0.989237	1		1.03157	1		0	1.276e-10	95.88	8.27614e-09	2	1817.05	1.63245	70.0893	0
High	dPNSIETLQSFGk	1	2	1	A0A0G2K6D5	N-Term(TMT10); K13(TMT10)	0	0.932557	1		0.918761	1		1.03451	1		1.05245	1		1.01184	1		1.09933	1		0.980065	1		1.01542	1		0.896454	1		0	9.425e-11	95.87	6.98817e-09	2	1894.03	1.22395	80.6755	0
High	eLAEDGYSGVEVR	5	1	1	P62909	N-Term(TMT10)	0	1.01311	5	4.7017	1.00226	5	2.64222	0.974832	5	2.30199	1.03272	5	1.38422	0.950545	5	7.29328	1.02467	5	3.28122	0.942738	5	1.76031	0.993661	5	7.68927	1.06836	5	0.999749	0	1.435e-10	95.82	3.41673e-09	2	1652.83	0.794281	65.7072	0
High	lVGQGATAVLLDVPNSEGETEAk	1	2	1	B0BMW2	N-Term(TMT10); K23(TMT10)	0	0.978693	1		0.998584	1		0.948441	1		1.00408	1		1.05888	1		1.02649	1		0.963167	1		1.04152	1		1.01627	1		0	2.472e-14	95.81	7.51839e-09	2	2756.51	1.68755	86.8793	0
High	aPAPAAPAAEPQAEAPVASSEQSVAVkE	2	2	2	A0A0G2K1L8;Q05175	N-Term(TMT10); K27(TMT10)	0																												0	5.919e-15	95.78	7.50444e-09	3	3131.67	0.836941	67.7308	1
High	vEGEVVLPSVQGDLk	5	1	1	F1LUD3	N-Term(TMT10); K15(TMT10)	0	1.00731	5	7.45371	1.02695	5	6.26868	0.965516	5	2.41674	1.04211	5	2.42127	0.980462	5	3.62801	1.03098	5	3.28285	0.944172	5	3.14651	0.984389	5	2.75096	1.04075	5	5.53975	0	4.197e-12	95.76	7.04798e-09	2	2027.18	1.64429	83.1862	0
High	vDIDVPDVNVDGPDMk	4	2	1	A0A0G2JUA5	N-Term(TMT10); K16(TMT10)	0	1.1757	4	5.72027	1.21179	4	4.6496	0.906407	4	2.61633	0.977543	4	4.09031	0.92349	4	6.09943	0.979708	4	4.92121	0.876753	4	5.0927	0.896211	4	1.88869	1.21435	4	7.23235	0	4.334e-11	95.75	7.05092e-09	2	2186.14	1.35561	85.9817	0
High	dALNQATSQVESk	2	1	1	F1M853	N-Term(TMT10); K13(TMT10)	0	1.06264	2	18.0041	1.12749	2	6.17401	1.01476	2	12.7863	0.979242	2	2.85852	0.940917	2	2.36538	0.950382	2	7.83203	0.977412	2	4.00944	0.963519	2	1.90539	1.05709	2	9.31213	0	1.48e-10	95.69	9.13185e-09	2	1849.01	1.63759	63.8136	0
High	fASEIAGVDDLGTTGR	2	1	1	Q66HF1	N-Term(TMT10)	0	0.950356	2	4.46426	0.922803	2	0.0437997	0.99133	2	1.96292	1.02614	2	0.00556302	1.07226	2	0.753997	1.00808	2	7.23507	1.04865	2	2.84169	1.09385	2	6.39139	0.864158	2	1.20433	0	5.102e-12	95.64	5.37609e-09	2	1837.95	-0.212787	83.9411	0
High	aGNNMLLVGVHGPR	1	1	1	C0JPT7	N-Term(TMT10)	0	0.993896	1		1.02749	1		0.969922	1		1.01922	1		0.979269	1		0.951474	1		1.1093	1		0.99207	1		1.01146	1		0	2.733e-11	95.63	8.73918e-09	2	1663.93	2.19842	66.6306	0
High	sETAPAAPAAPAPAEk	2	1	1	P15865	N-Term(TMT10); K16(TMT10)	0	1.32191	2	15.6849	1.12159	2	5.86715	0.902345	2	6.3356	0.855898	2	1.69425	0.885083	2	4.8456	0.88375	2	0.903282	0.991623	2	10.2605	0.981662	2	9.29486	1.29612	2	5.4845	0	4.143e-12	95.63	8.84859e-09	2	1937.08	0.506822	54.2427	0
High	qLSSSVTGLTNIEEENcQR	3	1	1	G3V7Q7	N-Term(TMT10); C17(Carbamidomethyl)	0	1.01625	3	7.00283	1.02435	3	3.84433	1.02833	3	2.89657	1.05441	3	0.649041	1.00223	3	5.19218	1.02841	3	5.64851	0.968692	3	4.15936	0.926069	3	4.88575	0.950843	3	2.84827	0	5.399e-15	95.61	3.47609e-09	2	2394.18	0.667075	74.4729	0
High	iDSDGDGLVTTEELk	3	1	1	D3ZUB0	N-Term(TMT10); K15(TMT10)	0	0.831539	3	0.39002	0.903687	3	3.81518	1.07292	3	4.68624	1.13853	3	0.732396	0.97802	3	2.60635	1.08979	3	6.65218	0.988812	3	1.74544	0.963165	3	2.25231	0.833968	3	7.47414	0	1.028e-11	95.59	7.79863e-09	2	2050.1	1.1037	80.1971	0
High	aADAHVDAHYYEQNEQPTGTcAAcITGGNR	2	3	1	A0A0G2JSL8	N-Term(TMT10); C21(Carbamidomethyl); C24(Carbamidomethyl)	0	1.04139	2	1.08791	0.960914	2	12.7395	0.945828	2	2.4774	0.93134	2	4.78793	0.894418	2	23.0364	1.07455	2	13.9352	0.890051	2	0.952021	0.919726	2	3.56173	1.43577	2	9.19062	0	5.147e-14	95.52	6.4525e-10	4	3506.57	0.242244	57.6525	0
High	aIEMLGGELGSk	2	1	1	P14408	N-Term(TMT10); K12(TMT10)	0	1.04866	2	0.875306	1.08115	2	0.238145	0.946918	2	3.17367	1.00963	2	1.31311	0.980375	2	0.71441	1.0156	2	4.79382	0.942462	2	2.23253	0.956068	2	0.100772	1.09738	2	2.96915	0	2.127e-09	95.51	9.34957e-09	2	1662.95	0.132103	85.5833	0
High	dLDVEGTDEPIFGk	2	1	1	D4AE49	N-Term(TMT10); K14(TMT10)	0	1.04419	2	2.5876	1.0309	2	2.07379	0.960373	2	1.58415	0.999954	2	2.14171	0.960597	2	4.57796	1.00837	2	4.62201	0.989059	2	3.05555	0.979818	2	0.196066	1.09217	2	11.2255	0	1.158e-11	95.49	6.69497e-09	2	1993.05	0.945252	84.0727	0
High	lLDPEDVDVPQPDEk	3	12	1	Q6S3A0	N-Term(TMT10); K15(TMT10)	0	1.04202	3	1.50178	1.06617	3	0.754337	1.02527	3	1.97	1.00814	3	0.737577	0.887087	3	0.411514	1.04	3	1.46328	0.924714	3	6.945	0.90056	3	1.67112	1.10823	3	1.61577	0	3.695e-11	95.45	7.28435e-09	2	2167.15	0.481421	83.3053	0
High	kTPQGPPEIYSDTQFPSLQSTAk	5	4	1	A0A0G2K0B0	N-Term(TMT10); K1(TMT10); K23(TMT10)	0	0.990415	5	3.74938	1.09999	5	2.99506	0.923917	5	6.86111	0.924371	5	3.54738	1.09671	5	4.65282	0.947856	5	7.19599	1.05636	5	3.17258	1.02102	5	0.399297	1.06672	5	2.20801	0	1.076e-13	95.43	7.64736e-09	3	3207.75	0.505988	78.2098	1
High	mVNSNLASVEELk	1	5	1	F7FKI5	N-Term(TMT10); K13(TMT10)	0	0.92601	1		0.863451	1		1.06561	1		1.03144	1		1.04574	1		1.02273	1		1.07946	1		1.02384	1		0.887833	1		0	1.485e-10	95.38	9.21355e-09	2	1892.06	2.09033	81.3918	0
High	gNPTVEVDLHTAk	7	2	2	P07323;P15429	N-Term(TMT10); K13(TMT10)	0																												0	5.67e-11	95.37	8.75563e-09	2	1839.04	3.02613	62.8203	0
High	eEASDYLELDTIk	4	3	1	A0A0A0MY09	N-Term(TMT10); K13(TMT10)	0	1.20357	4	1.35014	1.19815	4	3.962	0.956263	4	5.6835	0.975503	4	1.79559	0.912384	4	2.55402	1.00474	4	1.87325	0.868624	4	2.43101	0.867797	4	1.24346	1.17451	4	3.03419	0	4.538e-10	95.37	6.72281e-09	2	1984.06	1.62319	85.2179	0
High	lGDVYVNDAFGTAHR	3	3	1	P16617	N-Term(TMT10)	0	0.920776	3	13.8225	0.999679	3	1.13658	0.96636	3	3.72639	1.11488	3	6.03219	0.974702	3	4.02648	1.11304	3	1.02495	0.951418	3	4.20784	0.962981	3	2.53185	0.988178	3	8.66365	0	4.431e-12	95.33	5.55404e-09	2	1863.96	2.21722	74.9213	0
High	iFVGNVSAAcTSQELR	3	2	1	M0R3R6	N-Term(TMT10); C10(Carbamidomethyl)	0	1.10849	3	2.0276	1.10307	3	7.96594	0.989934	3	4.64119	1.02071	3	0.134206	0.953229	3	2.59573	1.0221	3	1.29395	0.904141	3	9.4847	0.941088	3	3.79414	1.00873	3	0.381994	0	4.996e-13	95.22	6.65846e-09	2	1981.04	2.47279	78.504	0
High	eAYPEEAYIADLDAk	1	4	1	A0A0G2K5E7	N-Term(TMT10); K15(TMT10)	0	1.13262	1		1.22022	1		0.891069	1		0.970576	1		0.913495	1		1.01371	1		0.888582	1		0.912049	1		1.22192	1		0	2.395e-12	95.21	6.56835e-09	2	2156.12	1.40394	86.9412	0
High	eVAVSESEAQFYEQNSR	1	1	1	D3ZZL3	N-Term(TMT10)	0	0.967137	1		0.987715	1		1.00429	1		1.06717	1		1.00532	1		0.970875	1		1.01267	1		1.00587	1		0.99251	1		0	5.64e-14	95.21	2.16936e-09	2	2202.05	0.676039	69.6488	0
High	yINENLIINTDELGR	2	1	1	P28480	N-Term(TMT10)	0	1.01973	2	3.73209	0.987483	2	5.685	0.96929	2	1.89143	0.996123	2	0.339322	0.967336	2	9.09575	1.07905	2	1.75951	0.984705	2	3.81185	0.987307	2	2.97167	1.03171	2	9.39264	0	5.748e-10	95.16	7.48258e-09	2	2006.08	1.80348	86.5963	0
High	gAGTPGQPGQVSQQELDTVVR	2	3	1	A0A0G2JXC1	N-Term(TMT10)	0	1.31576	2	7.71463	1.22743	2	16.9889	0.909415	2	13.3321	0.867098	2	12.9677	0.917756	2	0.0781773	0.886292	2	6.96928	0.933041	2	0.391049	0.905106	2	2.86037	1.28165	2	7.8375	0	4.543e-15	95.13	7.97946e-09	2	2353.24	2.48199	66.7877	0
High	vEkEEVSGGGGGISEEEAAQYDR	3	1	1	Q6AXQ0	N-Term(TMT10); K3(TMT10)	0	1.05097	3	6.79875	1.11532	3	5.13049	0.941944	3	16.9722	0.944285	3	1.57664	1.00281	3	9.19621	0.927336	3	0.570097	0.95162	3	3.75888	0.928495	3	4.29667	1.03496	3	1.96219	0	2.707e-17	95.08	5.107e-09	3	2854.41	0.832334	60.6325	1
High	aQSELSGAADEAAR	1	2	1	G3V7Y3	N-Term(TMT10)	0	1.00023	1		0.941572	1		1.06246	1		1.02829	1		1.00467	1		1.02076	1		1.0138	1		0.993406	1		0.915118	1		0	2.474e-12	95.05	4.12642e-09	2	1604.81	0.661879	55.0416	0
High	dTMSSVEPDISSAk	1	2	2	A0A0G2JW88;Q5M7W5	N-Term(TMT10); K14(TMT10)	0																												0	3.52e-11	95.04	6.01591e-09	2	1925	2.20217	66.9365	0
High	eAGALDSGILELPk	3	3	1	G3V8F8	N-Term(TMT10); K14(TMT10)	0	1.42166	3	17.496	1.42759	3	21.4865	0.830297	3	17.7063	0.827026	3	4.99768	0.868359	3	4.99032	0.823963	3	12.3264	0.883731	3	8.6102	0.906297	3	1.89654	1.3788	3	26.4362	0	9.647e-11	94.98	8.59344e-09	2	1871.09	1.73559	86.5286	0
High	aSAGPQPLLVQSck	1	2	1	G3V852	N-Term(TMT10); C13(Carbamidomethyl); K14(TMT10)	0	1.30895	1		1.39252	1		1.08841	1		1.06647	1		0.648132	1		1.06649	1		0.600745	1		0.544312	1		1.46621	1		0	1.963e-11	94.92	9.45384e-09	2	1914.09	1.0555	64.455	0
High	nDQDTWDYTNPNLSGQGDPGSNPNk	1	3	1	F1LQ48	N-Term(TMT10); K25(TMT10)	0	0.975911	1		0.930987	1		1.02959	1		1.01473	1		0.944614	1		0.951788	1		1.05695	1		1.11278	1		0.998599	1		0	4.969e-13	94.91	1.8241e-09	3	3192.49	0.541715	70.7356	0
High	iTLVSSGSGTMGAAk	1	2	1	Q9Z1E1	N-Term(TMT10); K15(TMT10)	0	1.06213	1		1.0284	1		0.968244	1		1.03242	1		0.98171	1		1.04778	1		0.965105	1		0.954681	1		0.997129	1		0	1.987e-12	94.86	9.87928e-09	2	1838.05	2.51752	71.2996	0
High	dQTPDENEEVIVR	2	1	1	D3ZWZ6	N-Term(TMT10)	0	0.901037	2	5.77226	0.931765	2	4.20937	1.08887	2	0.652299	1.04947	2	2.36742	1.06832	2	0.454062	1.02809	2	4.96461	1.00442	2	2.86674	1.01283	2	6.26475	0.845108	2	8.89611	0	1.776e-10	94.85	4.28816e-09	2	1772.89	2.1677	56.5854	0
High	eAELEGATEETVR	1	1	1	Q5HZE4	N-Term(TMT10)	0	0.961106	1		0.846142	1		1.08041	1		0.998376	1		1.0636	1		0.981679	1		1.05942	1		1.07484	1		0.900352	1		0	1.37e-10	94.84	4.16681e-09	2	1662.84	0.864815	59.9959	0
High	nDVVGTTYLYLSk	1	2	1	D4ACN7	N-Term(TMT10); K13(TMT10)	0	1.00778	1		1.01985	1		0.95471	1		1.02414	1		1.0524	1		0.978254	1		1.0561	1		1.05213	1		0.884625	1		0	6.687e-11	94.84	1.06467e-08	2	1931.09	2.21326	86.1152	0
High	lVQSPNSYFMDVk	3	3	1	M0RA26	N-Term(TMT10); K13(TMT10)	0	1.13295	3	1.79866	1.14894	3	4.30132	0.935375	3	2.41127	1.01911	3	0.24485	0.887451	3	0.722017	1.0515	3	0.938756	0.88122	3	1.04244	0.885423	3	0.582942	1.13413	3	5.45565	0	2.04e-09	94.8	9.81804e-09	2	1986.08	1.08552	85.6683	0
High	kGAAIDALNDGELQk	5	1	1	P50503	N-Term(TMT10); K1(TMT10); K15(TMT10)	0	0.922767	5	4.21911	1.01838	5	5.02853	1.01514	5	1.71813	1.052	5	1.12196	0.992518	5	2.2107	1.00337	5	2.01094	0.982866	5	1.26888	0.941462	5	1.18576	1.00375	5	6.34307	0	2.984e-12	94.78	9.14814e-09	2	2230.3	1.74054	69.0856	1
High	eEAAAGSGSAGEGDGk	1	1	1	Q5U2S7	N-Term(TMT10); K16(TMT10)	0	0.896402	1		0.842982	1		0.99187	1		1.19972	1		1.0224	1		0.938535	1		1.04978	1		1.03464	1		0.977426	1		0	1.072e-10	94.74	3.25665e-09	2	1850.92	1.48463	40.9132	0
High	lNVAEVTQSEIAQk	4	2	1	G3V818	N-Term(TMT10); K14(TMT10)	0	1.12198	4	2.84967	1.08046	4	7.34207	0.993222	4	5.40308	0.956714	4	4.73592	0.945809	4	5.27037	1.00906	4	3.62048	0.952359	4	4.10081	0.974929	4	6.75511	1.11468	4	7.22917	0	1.572e-11	94.74	1.10122e-08	2	1988.15	1.76778	82.443	0
High	aPEGSAMPVTDAAPk	2	3	2	F1LN75;B2GVB4	N-Term(TMT10); K15(TMT10)	0																												0	1.638e-11	94.67	8.6663e-09	2	1900.03	1.06941	60.3597	0
High	eEVSGGGGGISEEEAAQYDR	2	1	1	Q6AXQ0	N-Term(TMT10)	0	0.98225	2	7.74554	0.986419	2	3.94729	0.955066	2	1.08693	1.03105	2	0.182638	0.995984	2	5.2908	1.06661	2	3.63584	0.970665	2	4.35454	0.959293	2	14.8633	1.06888	2	9.53053	0	3.161e-16	94.62	1.34606e-09	2	2269.05	1.46772	58.7294	0
High	lSHANSAVVLSAVk	1	5	2	P62944;A0A0G2K2V2	N-Term(TMT10); K14(TMT10)	0																												0	8.192e-12	94.6	7.69756e-09	2	1854.13	2.38103	66.3479	0
High	aLADDDFLTVTGk	2	1	1	G3V681	N-Term(TMT10); K13(TMT10)	0	1.49968	2	2.39057	1.48846	2	1.7546	0.824668	2	2.34056	0.841038	2	2.34912	0.827768	2	1.07627	0.841319	2	2.08003	0.779641	2	2.01452	0.822644	2	4.33205	1.49141	2	0.964818	0	2.306e-10	94.57	1.12423e-08	2	1824.01	-1.28514	85.8124	0
High	vHNDAQNFDYDHDAFLGAEEAk	6	3	2	G3V6S3;Q3MID6	N-Term(TMT10); K22(TMT10)	0																												0	1.371e-13	94.57	3.59615e-09	3	2964.42	1.35982	70.8447	0
High	gDVTITNDGATILk	3	1	1	Q7TPB1	N-Term(TMT10); K14(TMT10)	0	0.922384	3	12.1788	0.930188	3	1.1579	1.02914	3	4.44061	1.0151	3	0.521762	1.00852	3	3.17191	1.09933	3	1.12533	0.946608	3	2.29131	0.970503	3	6.69431	0.966886	3	12.1075	0	9.532e-11	94.55	1.23289e-08	2	1876.08	1.58075	75.0271	0
High	sLTEYLQNVEQk	2	1	1	Q2PQA9	N-Term(TMT10); K12(TMT10)	0	1.13969	2	1.85511	1.1478	2	4.36769	0.932659	2	3.30119	1.03929	2	1.35397	0.912412	2	0.252331	1.00811	2	3.2609	0.877296	2	4.11056	0.897563	2	6.58133	1.16062	2	2.98434	0	8.635e-10	94.53	1.10644e-08	2	1910.07	1.4536	85.579	0
High	vSESVVFTDTNSILR	3	2	1	A0A0G2JZI2	N-Term(TMT10)	0	0.720035	3	2.49369	0.794816	3	21.5152	1.06552	3	6.09829	1.07739	3	1.84179	1.08153	3	2.57719	1.07407	3	6.6735	1.14298	3	0.892059	1.11158	3	1.04919	0.770134	3	18.409	0	3.111e-12	94.44	1.06666e-08	2	1896.03	1.02599	86.6368	0
High	aEGPEVDVNLQk	7	2	1	A0A0G2JUA5	N-Term(TMT10); K12(TMT10)	0	1.27088	7	3.50503	1.24002	7	8.17867	0.899399	7	2.56535	0.912368	7	3.20877	0.919941	7	4.3067	0.966028	7	5.39818	0.93265	7	8.37492	0.908149	7	2.15003	1.22588	7	5.78582	0	4.91e-09	94.43	1.02945e-08	2	1756.99	1.84137	68.7833	0
High	aALETDENLLLcAPTGAGk	2	2	1	M3ZCQ2	N-Term(TMT10); C12(Carbamidomethyl); K19(TMT10)	0	1.06685	2	5.70987	1.09388	2	8.43036	1.04349	2	5.62385	0.993673	2	1.17787	0.894455	2	2.85695	0.996094	2	2.27949	0.901472	2	4.9684	0.919447	2	0.791641	1.16567	2	6.25942	0	2.417e-13	94.35	1.0945e-08	2	2402.3	-0.567613	86.7608	0
High	gFSSGSAVVSGGSR	1	2	1	A0A0G2JWX4	N-Term(TMT10)	0	1.03586	1		0.987063	1		0.880666	1		0.824908	1		1.16063	1		0.842755	1		1.19376	1		1.23328	1		0.987411	1		0	4.373e-11	94.29	5.21348e-09	2	1483.77	1.73305	55.5213	0
High	dPTGQPGGELMLGGTDSR	5	2	1	P24268	N-Term(TMT10)	0	1.03238	5	5.2568	0.994555	5	6.49706	1.0112	5	4.12991	1.00761	5	3.27343	0.999211	5	6.18342	1.02491	5	0.81387	0.968415	5	7.01101	0.98573	5	4.44714	1.02876	5	7.64275	0	4.259e-14	94.28	4.29238e-09	2	2016.99	1.75221	66.9629	0
High	gDGPVQGVIHFEQk	7	3	1	Q6LDS4	N-Term(TMT10); K14(TMT10)	0	1.15588	7	0.697737	1.21572	7	7.21509	0.995434	7	3.21388	1.03346	7	1.39642	0.814566	7	4.39095	1.07057	7	1.77042	0.812703	7	6.4136	0.778276	7	4.89859	1.26428	7	3.61317	0	1.444e-11	94.25	1.07677e-08	2	1969.1	2.32554	70.6197	0
High	fNAHGDANTIVcNSk	6	1	1	P11762	N-Term(TMT10); C12(Carbamidomethyl); K15(TMT10)	0	1.03903	6	5.33218	1.03462	6	4.79605	0.948034	6	2.97835	0.994383	6	2.11046	0.976027	6	5.95546	1.01594	6	1.55424	1.02393	6	5.75792	0.952639	6	8.39708	1.05033	6	3.29843	0	9.002e-13	94.23	7.36266e-09	2	2106.08	0.376522	61.4495	0
High	iGGDAATTVNNNTPDFGFGGQk	1	3	1	M0R961	N-Term(TMT10); K22(TMT10)	0	0.977769	1		1.08729	1		0.970686	1		0.974499	1		1.01484	1		0.976842	1		1.06119	1		1.0264	1		0.967502	1		0	6.785e-13	94.18	7.27604e-09	2	2639.35	1.1297	81.061	0
High	iEGSITGPcVEIGTPDVDVHGLGGk	2	3	1	A0A0G2JUA5	N-Term(TMT10); C9(Carbamidomethyl); K25(TMT10)	0	1.08243	2	7.07851	1.25671	2	3.92729	0.882897	2	2.38517	0.951459	2	0.867582	0.965204	2	4.2267	1.0201	2	5.14943	0.910195	2	6.58388	0.880643	2	0.258608	1.20848	2	9.75228	0	3.413e-14	94.16	1.12234e-08	3	2965.58	2.47734	83.856	0
High	eEEAPGGEAAASQAQAPTNAPGGAR	1	2	1	B2RYN4	N-Term(TMT10)	0	1.16653	1		1.21492	1		0.965369	1		0.813976	1		0.938571	1		0.817197	1		1.01264	1		1.11251	1		1.18858	1		0	5.614e-14	94.13	3.84435e-09	3	2566.24	2.26188	49.3297	0
High	nVTELNEPLSNEER	3	1	1	P61983	N-Term(TMT10)	0	0.913154	3	0.824401	0.808503	3	13.8768	1.10799	3	4.09654	0.966949	3	0.195754	1.1846	3	9.05352	0.883803	3	1.64373	1.19086	3	0.551491	1.11433	3	2.07581	0.780354	3	9.38902	0	5.591e-11	94.12	5.1118e-09	2	1872.95	1.17184	62.7191	0
High	cDADADcMDGSDEEAcGTGVR	2	1	1	G3V928	N-Term(TMT10); C1(Carbamidomethyl); C7(Carbamidomethyl); C16(Carbamidomethyl)	0	1.09519	2	1.32972	0.911604	2	14.6692	1.05141	2	12.7456	0.995705	2	3.57426	0.930678	2	8.28243	0.97786	2	4.00999	1.10481	2	2.36501	1.02757	2	2.879	0.906664	2	7.21242	0	2.57e-12	94.1	3.88124e-10	3	2519.96	2.33303	52.9283	0
High	gTGVVTSVPSDSPDDFAALR	2	1	1	Q5PPJ6	N-Term(TMT10)	0	0.839245	2	9.29826	0.801403	2	8.05752	1.01438	2	3.43152	1.08406	2	2.8124	1.06878	2	3.90631	1.10947	2	1.27213	1.03639	2	2.52233	1.09034	2	0.366589	0.840679	2	7.78608	0	2.036e-11	94.05	7.83165e-09	2	2220.14	0.837295	80.6783	0
High	nTDQASMPDNTAAQk	4	6	1	G3V6P7	N-Term(TMT10); K15(TMT10)	0	0.986266	4	4.87126	0.942587	4	8.13281	1.09556	4	1.05302	0.994426	4	4.64192	1.08556	4	5.23628	0.9195	4	7.47295	1.06293	4	2.71248	1.01576	4	3.88681	0.893425	4	7.3522	0	8.476e-11	94	5.67303e-09	2	2050.03	-0.228334	50.6725	0
High	gADIMYTGTVDcWR	2	2	1	Q05962	N-Term(TMT10); C12(Carbamidomethyl)	0	1.05033	2	5.41568	0.970904	2	1.42213	0.986275	2	1.94577	1.03625	2	4.33821	0.966218	2	0.932872	1.04594	2	0.490391	0.904087	2	3.30197	0.971194	2	1.18223	1.1051	2	0.596116	0	5.808e-11	93.95	1.46992e-09	2	1873.88	2.27558	80.5465	0
High	fSPDGELYASGSEDGTLR	2	1	1	Q5XIG8	N-Term(TMT10)	0	1.01095	2	0.295644	1.08516	2	1.43535	0.978158	2	1.99473	1.00688	2	0.314844	0.994664	2	4.30978	1.00451	2	4.58346	0.999111	2	5.08172	0.980612	2	0.706842	0.988337	2	0.348662	0	5.273e-14	93.85	2.71984e-09	2	2130.02	1.10071	77.2506	0
High	lQQQLTQAQEALk	1	1	1	A0A096MJZ2	N-Term(TMT10); K13(TMT10)	0	1.07651	1		1.12513	1		1.0014	1		0.989314	1		0.920959	1		0.993619	1		0.974462	1		0.923969	1		1.08053	1		0	2.783e-11	93.83	1.13229e-08	2	1957.15	1.27692	81.1635	0
High	qWSNcAFLESSAk	2	1	1	Q62636	N-Term(TMT10); C5(Carbamidomethyl); K13(TMT10)	0	1.04447	2	2.87834	1.08052	2	0.631969	1.0498	2	3.62193	1.00692	2	2.83512	0.962474	2	2.25858	1.02402	2	1.67361	0.93009	2	1.89967	0.892549	2	0.605327	1.05093	2	1.28344	0	4.219e-11	93.81	7.61116e-09	2	1986.02	1.46067	79.6729	0
High	lSEEEAQASAISVGSR	2	2	1	Q1RP74	N-Term(TMT10)	0	0.994525	2	8.03738	1.01486	2	3.9906	0.996058	2	6.15033	0.997836	2	3.0077	0.999623	2	0.139957	1.00974	2	1.52028	1.01711	2	6.16879	0.992197	2	7.23558	1.00714	2	2.53648	0	4.26e-12	93.79	7.08222e-09	2	1862.97	1.42143	67.0852	0
High	sFLTAEDcFELGk	1	1	1	P54001	N-Term(TMT10); C8(Carbamidomethyl); K13(TMT10)	0	1.05772	1		1.15666	1		1.08611	1		1.05851	1		0.893995	1		1.05044	1		0.811089	1		0.818666	1		1.10613	1		0	7.767e-11	93.77	9.86434e-09	2	1975.03	2.01254	87.7822	0
High	sPPAVQQDNVDEDLIR	2	1	1	Q5U300	N-Term(TMT10)	0	0.991925	2	1.98601	1.06092	2	15.6627	0.955593	2	1.51417	0.997601	2	3.09161	0.966577	2	7.34458	1.0708	2	0.46419	0.972475	2	6.4354	1.02392	2	6.91516	0.983171	2	4.59927	0	5.321e-11	93.76	9.36117e-09	2	2025.05	1.38064	67.0786	0
High	vDNIQAGELTEGIWR	1	1	1	Q04931	N-Term(TMT10)	0	1.0538	1		1.04167	1		0.992288	1		0.993087	1		1.06189	1		0.983389	1		1.01166	1		1.01942	1		0.881	1		0	2.926e-12	93.74	9.15078e-09	2	1930.03	1.074	87.563	0
High	sQGSGLSSGGAGEGQGPk	1	2	1	A0A0G2JZI2	N-Term(TMT10); K18(TMT10)	0	0.755416	1		0.734866	1		1.13028	1		1.05157	1		1.168	1		1.05038	1		1.16489	1		1.06436	1		0.714178	1		0	4.869e-13	93.64	8.93141e-09	3	2019.05	0.125922	46.89	0
High	lEGDIVLGDQDVAAk	3	1	1	F1LUD3	N-Term(TMT10); K15(TMT10)	0	0.988974	3	3.47185	1.01089	3	2.14844	0.994431	3	3.15943	1.0053	3	1.2969	1.01154	3	2.97514	1.00198	3	1.5749	0.981718	3	0.701358	1.00294	3	0.118999	1.06907	3	0.103952	0	1.759e-11	93.63	1.24634e-08	2	2001.12	-2.77335	82.0251	0
High	dVGGIVLANAcGPcIGQWDR	1	1	1	Q9ER34	N-Term(TMT10); C11(Carbamidomethyl); C14(Carbamidomethyl)	0	1.23118	1		1.24861	1		1.03021	1		1.10099	1		0.736386	1		1.05509	1		0.79291	1		0.749647	1		1.1556	1		0	5.956e-14	93.62	5.88761e-09	2	2387.18	0.965659	87.2944	0
High	tTGIVMDSGDGVTHTVPIYEGYALPHAILR	6	4	1	P60711	N-Term(TMT10)	0	1.10642	6	10.7567	1.04802	6	11.4951	0.875969	6	8.00448	0.986356	6	10.8204	0.978674	6	5.80203	1.02616	6	4.08968	0.96869	6	8.18808	0.965458	6	11.5602	1.12729	6	11.9439	0	2.928e-16	93.62	1.07759e-08	4	3412.78	1.39238	86.9014	0
High	mLGQMTDQVADLR	3	3	1	P85972	N-Term(TMT10)	0	1.01154	3	2.92219	0.980612	3	5.20972	1.00185	3	2.45961	0.967507	3	3.7375	1.09432	3	9.62056	0.996347	3	10.5924	1.02572	3	9.37392	1.01293	3	3.62478	0.937368	3	0.985642	0	1.721e-09	93.56	7.84188e-09	2	1706.88	1.70075	83.0555	0
High	eVEVAASTAAGAPAQR	4	2	1	D4ACC2	N-Term(TMT10)	0	1.10897	4	6.71852	1.0511	4	10.0827	0.980003	4	12.1133	0.956217	4	4.92131	0.981102	4	5.75803	0.95878	4	4.14584	0.961792	4	3.61035	0.965881	4	6.83154	1.1205	4	13.8826	0	2.174e-11	93.52	9.91528e-09	2	1756.94	0.597542	56.7643	0
High	vLLFSDGNSQGATAEAIEk	1	1	1	D3ZUL3	N-Term(TMT10); K19(TMT10)	0	1.26465	1		1.28773	1		0.849826	1		0.852285	1		0.916761	1		0.890471	1		0.852247	1		0.995106	1		1.38892	1		0	1.064e-14	93.47	1.41906e-08	2	2408.31	1.41731	85.5409	0
High	gVVQDLQQAISk	4	1	1	Q68FR9	N-Term(TMT10); K12(TMT10)	0	0.905527	4	2.80431	1.06072	4	5.36412	1.01962	4	3.30322	1.02488	4	4.00777	0.995471	4	2.29484	1.05483	4	1.45073	0.960309	4	4.35715	0.944898	4	4.24622	1.04867	4	4.28038	0	1.719e-09	93.35	1.33397e-08	2	1744.04	1.1598	85.2267	0
High	qLEVYTSGGDPESVAGEYGR	3	1	1	G3V7G9	N-Term(TMT10)	0	0.92777	3	8.15043	0.980697	3	1.10366	1.02241	3	1.12148	1.02132	3	6.2758	1.00116	3	3.97386	1.08424	3	4.7673	0.958929	3	0.451232	0.96732	3	7.97212	0.969821	3	0.491693	0	2.625e-12	93.33	4.76128e-09	2	2343.14	2.35005	74.4067	0
High	lGGSVELVDIGk	1	1	1	Q6Q0N1	N-Term(TMT10); K12(TMT10)	0	0.911814	1		0.949684	1		1.04298	1		1.01821	1		1.02991	1		1.03151	1		1.08177	1		1.04245	1		0.849869	1		0	1.373e-09	93.31	1.18765e-08	2	1645	1.62322	85.3981	0
High	mEGPGVDIDSPDVNIEGPEGk	4	2	1	A0A0G2JUA5	N-Term(TMT10); K21(TMT10)	0	1.21365	4	6.20123	1.23309	4	3.87202	0.934768	4	1.57935	0.956996	4	1.18745	0.9026	4	1.11362	0.949811	4	3.31642	0.89915	4	2.65363	0.876939	4	2.74878	1.22438	4	4.63396	0	9.254e-12	93.3	8.44262e-09	2	2613.32	1.62797	81.534	0
High	nLGSINTELQDVQR	3	1	1	Q4KM74	N-Term(TMT10)	0	0.993751	3	0.749701	0.915801	3	6.96351	0.993553	3	6.4363	0.916071	3	2.76876	1.08029	3	1.86169	0.895456	3	1.5199	1.15253	3	3.42888	1.14769	3	1.29816	0.932754	3	1.5785	0	1.456e-11	93.28	1.19588e-08	2	1815.98	2.13485	76.8419	0
High	lTSSVTAYDYAGk	1	2	1	B2RYT5	N-Term(TMT10); K13(TMT10)	0	0.890409	1		0.904725	1		0.999376	1		1.01649	1		1.07283	1		1.03118	1		1.10844	1		1.03608	1		0.908876	1		0	9.763e-11	93.26	1.4634e-08	2	1834	2.15184	73.6359	0
High	aSVDSETESSPGVNETAAASGQR	1	1	1	Q5U2U7	N-Term(TMT10)	0	0.968621	1		1.05548	1		0.995189	1		0.981598	1		1.05334	1		0.966467	1		0.983317	1		1.08589	1		0.951143	1		0	2.365e-12	93.26	3.65849e-09	3	2479.18	1.65895	51.6751	0
High	gPSDPNNAALQSSLAR	2	1	1	D4A2D7	N-Term(TMT10)	0	0.900197	2	0.709534	0.967633	2	2.89948	1.04641	2	1.73629	1.02578	2	6.85776	0.995992	2	7.76203	1.02729	2	12.4715	1.02244	2	9.58295	1.02776	2	6.40084	0.949615	2	1.50214	0	5.497e-13	93.17	1.00004e-08	2	1826.96	1.12211	57.674	0
High	gGNIGDGGGAADR	4	1	1	P46462	N-Term(TMT10)	0	1.04019	4	1.57772	0.995077	4	1.13873	0.95226	4	2.55758	0.922411	4	9.87239	1.02655	4	1.93443	1.0807	4	3.77624	1.09357	4	13.3107	0.89188	4	8.29469	1.1042	4	9.07477	0	1.064e-10	93.13	3.18597e-09	2	1345.67	0.246714	36.0307	0
High	aAPSPAPAEAASLk	2	1	1	Q5U2U8	N-Term(TMT10); K14(TMT10)	0	0.954171	2	14.7614	0.939246	2	12.4914	0.994782	2	6.43942	1.05168	2	4.15778	0.988689	2	10.4855	1.00548	2	4.55324	1.05787	2	13.0893	1.01392	2	3.58738	0.967974	2	18.9146	0	1.351e-08	93.11	1.48306e-08	2	1739.01	1.67794	60.358	0
High	sSPEPVALTESETEYVIR	1	2	1	Q4AEF8	N-Term(TMT10)	0	0.968579	1		1.10022	1		1.00423	1		0.963832	1		0.993761	1		0.976802	1		1.06811	1		0.97729	1		1.00483	1		0	5.8e-15	93.06	1.04547e-08	2	2236.16	1.91393	83.3723	0
High	dFLAGGVAAAISk	3	1	1	Q09073	N-Term(TMT10); K13(TMT10)	0	0.930324	3	9.79365	0.916665	3	2.12337	1.02763	3	3.89526	1.09213	3	0.728489	1.00146	3	4.83162	1.06874	3	3.55985	0.958664	3	0.6044	1.00743	3	5.43408	0.874892	3	0.648234	0	6.505e-10	93.05	1.56067e-08	2	1678	1.75241	87.3887	0
High	vGINYQPPTVVPGGDLAR	5	2	1	A0A0H2UHM7	N-Term(TMT10)	0	0.919895	5	5.08625	0.967274	5	1.00976	1.0297	5	4.08002	0.959454	5	2.9511	1.06388	5	2.53997	1.02651	5	2.91928	1.03308	5	3.84451	1.05656	5	2.72416	0.864595	5	3.07629	0	4.559e-10	93.03	1.4086e-08	2	2082.16	1.6393	80.4671	0
High	dGScGVAYVVQEPGDYEVSVk	4	1	1	C0JPT7	N-Term(TMT10); C4(Carbamidomethyl); K21(TMT10)	0	0.961765	4	0.832008	0.994505	4	2.40323	0.979272	4	2.22506	1.03217	4	2.383	0.981252	4	1.89213	1.05014	4	0.816771	0.972481	4	1.41024	1.00099	4	2.62038	1.00445	4	1.24304	0	8.446e-16	93.01	9.65067e-09	2	2716.36	2.76494	81.8642	0
High	dLGGSSSGAEVR	1	4	1	A0A0G2K174	N-Term(TMT10)	0	1.1093	1		1.02937	1		0.905322	1		0.966175	1		1.04745	1		0.884991	1		1.11857	1		1.11532	1		0.932843	1		0	2.823e-10	93	7.14192e-09	2	1363.7	0.381803	46.1634	0
High	gGAGGTDGQGGTFR	1	1	1	Q5XIP0	N-Term(TMT10)	0	0.924385	1		0.96896	1		0.97019	1		1.10864	1		0.941516	1		1.06412	1		0.992556	1		0.937147	1		1.08565	1		0	6.943e-09	92.89	4.34367e-09	2	1466.72	0.625014	40.254	0
High	dESSPYAAMLAAQDVAQR	2	2	1	P13471	N-Term(TMT10)	0	0.909201	2	0.731245	0.902602	2	8.69608	0.961499	2	0.0940599	1.02288	2	4.94821	1.07011	2	10.1487	1.03274	2	4.68649	1.08331	2	4.83898	1.0903	2	1.49172	0.899129	2	0.976171	0	1.106e-13	92.87	5.93879e-09	2	2152.06	2.81453	82.1492	0
High	aALAHSEEIATSQAAATk	3	13	1	Q6S3A0	N-Term(TMT10); K18(TMT10)	0	1.10402	3	10.7321	1.11968	3	3.07108	0.860458	3	1.54182	1.02636	3	0.459174	0.900205	3	0.629059	1.05743	3	4.35496	0.889227	3	7.3162	0.89659	3	1.12582	1.1948	3	11.4358	0	3.705e-14	92.84	1.62239e-08	2	2228.23	1.33368	61.3799	0
High	gkLPGPTVSASYSLEYGk	1	1	1	P36972	N-Term(TMT10); K2(TMT10); K18(TMT10)	0	0.928876	1		1.01533	1		1.04181	1		1.20806	1		0.773505	1		1.27899	1		0.716128	1		0.826725	1		1.12063	1		0	5.352e-14	92.79	1.50967e-08	3	2541.46	1.85035	74.2313	1
High	dVDGVTDVNLGk	2	1	1	B2GUZ3	N-Term(TMT10); K12(TMT10)	0	0.893926	2	0.410112	0.877032	2	1.70859	1.03279	2	0.608846	1.07218	2	4.76037	1.06306	2	4.30758	1.06931	2	4.04437	1.01629	2	0.0164926	1.02613	2	4.81557	0.8739	2	1.92762	0	5.369e-09	92.76	1.79556e-08	2	1689.95	3.19312	71.0187	0
High	ySELSTAQQQLIR	1	1	1	D3ZZ62	N-Term(TMT10)	0	0.80599	1		0.801822	1		1.06865	1		1.06838	1		1.06006	1		1.09467	1		1.08371	1		1.12377	1		0.754426	1		0	8.221e-11	92.76	1.46452e-08	2	1765.97	2.43287	73.4375	0
High	gITNLcVIGGDGSLTGADTFR	2	3	1	Q52KS1	N-Term(TMT10); C6(Carbamidomethyl)	0	1.26591	2	1.38801	1.30136	2	1.37822	0.906991	2	4.57209	0.989896	2	0.428628	0.798539	2	0.758719	0.971627	2	5.24879	0.810402	2	9.14898	0.824597	2	0.833722	1.35623	2	1.30416	0	7.25e-14	92.76	1.19439e-08	2	2353.21	2.66115	87.8938	0
High	vLNNMEIGTSLYDEEGAk	3	1	1	P16617	N-Term(TMT10); K18(TMT10)	0	0.945773	3	5.09268	0.925621	3	1.24544	1.00658	3	1.8984	1.0452	3	1.22697	0.996629	3	1.19423	1.06386	3	0.103651	1.01924	3	0.376148	1.04378	3	1.4936	0.933815	3	2.0334	0	1.881e-14	92.75	1.35641e-08	2	2441.26	0.487754	86.9594	0
High	aINQQTGAFVEISR	2	3	1	M0R961	N-Term(TMT10)	0	1.10537	2	0.62524	1.08736	2	2.09282	0.94511	2	1.86657	0.989571	2	0.123478	0.944477	2	2.3369	1.01503	2	2.01862	0.929826	2	1.66863	0.989478	2	0.98186	1.08734	2	5.79447	0	3.313e-11	92.73	1.544e-08	2	1762.97	1.81736	70.5883	0
High	lPEQEEEEEEEEER	1	1	1	Q9WVR7	N-Term(TMT10)	0	0.997275	1		0.973674	1		1.04986	1		1.03644	1		0.97057	1		1.00833	1		0.94532	1		0.960292	1		1.07436	1		0	2.925e-12	92.71	9.91224e-10	2	2032.91	0.867525	56.5888	0
High	eISEGDEVEVYSR	2	3	1	A0A0G2JWD2	N-Term(TMT10)	0	1.04783	2	1.98963	1.008	2	6.08982	0.98928	2	4.80852	1.00395	2	0.158771	0.994327	2	4.82557	1.00168	2	2.09066	1.02824	2	4.86708	0.96363	2	0.896593	1.00534	2	6.78139	0	1.072e-10	92.68	4.72072e-09	2	1740.85	1.63767	64.8267	0
High	sEPVkEEGSELEQPFAQATSSVGPDR	1	5	1	M0RBF0	N-Term(TMT10); K5(TMT10)	0	1.17629	1		1.16668	1		0.994163	1		0.941659	1		0.937682	1		0.899095	1		0.951728	1		0.985092	1		1.09986	1		0	9.812e-17	92.66	1.2195e-08	3	3232.64	1.63027	76.0796	1
High	lGEMWNNTAADDk	3	3	1	D3ZCR3	N-Term(TMT10); K13(TMT10)	0	0.959596	3	4.12984	0.988176	3	5.00518	0.964825	3	3.09772	1.00295	3	4.44122	1.03164	3	3.9506	0.984776	3	2.90141	1.0148	3	3.94143	1.0737	3	4.49655	0.944313	3	12.5174	0	5.009e-11	92.64	1.18157e-08	2	1922.97	1.77433	77.9087	0
High	eEIQSSISGVTAAYNR	2	2	1	G3V7Q7	N-Term(TMT10)	0	0.966632	2	5.663	0.997174	2	2.47646	0.972915	2	0.442108	1.07072	2	0.300052	0.984738	2	8.17152	1.0974	2	1.2429	0.946442	2	0.233679	1.00863	2	2.45678	0.931891	2	5.79063	0	7.383e-13	92.63	1.28253e-08	2	1954.01	1.32156	74.7736	0
High	lGNYVGAVQDcER	1	1	1	O70593	N-Term(TMT10); C11(Carbamidomethyl)	0	1.06021	1		1.11245	1		0.987037	1		0.996509	1		0.946414	1		1.04193	1		1.01758	1		0.895903	1		0.999239	1		0	1.403e-10	92.62	5.68897e-09	2	1709.85	1.52889	68.4623	0
High	dRPGDSEENTDAGNTDGAEVcAEESPR	1	1	1	D3ZBI5	N-Term(TMT10); C21(Carbamidomethyl)	0	1.02981	1		0.918896	1		1.00369	1		0.960425	1		0.996063	1		0.906798	1		0.995838	1		1.05389	1		1.22844	1		0	3.862e-15	92.58	5.5077e-10	3	3107.33	1.28467	47.6579	0
High	gIYAYGFEkPSAIQQR	3	4	3	Q6P3V8;Q5RKI1;Q3B8Q2	N-Term(TMT10); K9(TMT10)	0																												0	1.198e-13	92.57	1.76242e-08	2	2286.27	2.01175	74.3885	0
High	mTGLVDEAIDTk	4	3	1	P85972	N-Term(TMT10); K12(TMT10)	0	1.17478	4	6.7516	1.14535	4	8.05332	0.949091	4	3.05002	0.963277	4	2.62053	0.970725	4	1.81573	0.944056	4	7.18995	0.949757	4	1.3211	0.942379	4	0.98868	1.08836	4	1.75583	0	2.955e-09	92.54	1.60191e-08	2	1750.97	1.84049	84.5538	0
High	mLDAEDIVNTARPDEk	7	2	1	Q9QXQ0	N-Term(TMT10); K16(TMT10)	0	0.997453	7	6.09649	1.02522	7	4.95396	0.996196	7	3.98275	1.0224	7	3.47914	0.983078	7	3.37734	1.02662	7	4.92536	0.972679	7	3.06358	0.987548	7	3.01056	0.992182	7	2.09143	0	5.106e-12	92.53	1.29844e-08	2	2275.2	1.27085	78.0907	0
High	aVAGDASESALLk	3	2	1	P06685	N-Term(TMT10); K13(TMT10)	0	1.04409	3	2.38505	1.00558	3	2.38041	1.03905	3	1.70999	1.02463	3	1.33814	0.927493	3	1.76485	1.03702	3	4.3307	0.955781	3	1.67365	0.966852	3	3.85873	0.996781	3	3.44793	0	1.273e-10	92.51	1.83463e-08	2	1689.98	0.801689	69.4401	0
High	dQDVEPGAPSMGAk	2	3	1	A0A0G2JZI2	N-Term(TMT10); K14(TMT10)	0	0.738429	2	3.84184	0.796473	2	13.3887	1.1083	2	2.72419	1.09768	2	3.44167	1.12447	2	2.66889	1.09073	2	4.66117	1.06781	2	3.72352	1.07546	2	3.17653	0.719288	2	13.6351	0	3.739e-11	92.46	1.15495e-08	2	1859.96	1.32324	57.7765	0
High	aIAVTVQEMVTk	1	2	1	G3V852	N-Term(TMT10); K12(TMT10)	0	0.986949	1		1.04782	1		0.983143	1		1.00184	1		1.00048	1		1.01406	1		0.963852	1		0.969974	1		1.0843	1		0	1.64e-09	92.45	2.09053e-08	2	1748.04	2.62324	87.3623	0
High	yAGSALQYEDVSTAVQNLQk	2	2	1	A0A096MKH2	N-Term(TMT10); K20(TMT10)	0	1.00091	2	0.908818	1.0264	2	7.74279	0.96016	2	0.941149	1.0256	2	1.03465	0.952047	2	2.55826	1.13848	2	7.35226	0.956975	2	5.49512	0.967818	2	0.367078	0.968309	2	2.52725	0	1.627e-16	92.43	1.63157e-08	2	2643.41	2.7853	86.8402	0
High	nPSSAVPPLAGSVk	1	4	1	A0A0G2K174	N-Term(TMT10); K14(TMT10)	0	1.04325	1		1.04453	1		0.9489	1		0.973789	1		1.00959	1		0.954434	1		1.05245	1		0.990753	1		1.07447	1		0	4.791e-11	92.39	1.20256e-08	2	1782.05	1.11541	67.2572	0
High	dMNQILDAYENk	3	3	1	F8WFH8	N-Term(TMT10); K12(TMT10)	0	0.655253	3	0.228267	0.690709	3	3.91468	1.09204	3	3.2456	1.16083	3	3.29	1.07911	3	3.37025	1.19626	3	0.0663641	1.00816	3	10.5979	1.04164	3	10.5191	0.776784	3	31.2076	0	1.246e-09	92.38	1.13596e-08	2	1911.99	1.85137	87.6341	0
High	dHASIQMNVAEVDR	4	3	1	A0A0G2JXC3	N-Term(TMT10)	0	1.0085	4	9.89988	1.17518	4	11.3477	0.819696	4	8.8434	0.946314	4	4.07708	0.899952	4	15.1622	1.0006	4	5.88376	0.914745	4	24.0243	0.925038	4	13.6292	1.40819	4	15.5193	0	1.128e-11	92.37	7.85126e-09	2	1813.91	1.57453	61.1797	0
High	lQGNIGmDDAcASk	2	3	1	A0A0G2JUA5	N-Term(TMT10); M7(Oxidation); C11(Carbamidomethyl); K14(TMT10)	0	1.07882	2	13.9783	1.07182	2	12.2111	0.958342	2	7.98347	0.931798	2	3.73287	1.07112	2	4.17202	0.913709	2	3.31501	1.02435	2	10.5867	1.01769	2	0.573606	1.03128	2	12.3747	0	7.67e-08	92.37	9.41572e-09	2	1953.98	2.72847	58.6947	0
High	dTAEGVSQELISAGLVDGR	1	1	1	D3ZUC9	N-Term(TMT10)	0	1.09698	1		1.079	1		0.94416	1		1.001	1		0.889211	1		1.02004	1		0.956131	1		0.995129	1		1.10994	1		0	9.389e-13	92.36	1.17895e-08	2	2146.12	1.67413	87.7963	0
High	aFGPGLQGGNAGSPAR	1	1	1	C0JPT7	N-Term(TMT10)	0	0.94013	1		0.948473	1		1.00959	1		1.02419	1		1.0434	1		1.0528	1		1.02743	1		1.00337	1		0.929411	1		0	2.274e-11	92.33	1.09941e-08	2	1685.9	2.58537	62.2609	0
High	gNLAYATSTGGIVNk	1	1	1	Q8VI04	N-Term(TMT10); K15(TMT10)	0	1.12606	1		1.07259	1		0.911762	1		0.983748	1		0.941788	1		1.02752	1		0.94941	1		0.91433	1		1.19443	1		0	2.942e-12	92.29	1.8975e-08	2	1924.09	1.22953	68.3548	0
High	tPQGPPEIYSDTQFPSLQSTAk	2	4	1	A0A0G2K0B0	N-Term(TMT10); K22(TMT10)	0	0.845925	2	13.6664	0.886072	2	21.4989	0.90673	2	14.8809	0.860062	2	4.76207	1.26247	2	7.04552	0.917122	2	8.68953	1.24459	2	1.15901	1.2125	2	5.72561	0.883365	2	10.1385	0	1.262e-11	92.29	1.41058e-08	2	2850.49	-0.657797	83.259	0
High	eAFQEALAAAGDk	5	1	1	P11232	N-Term(TMT10); K13(TMT10)	0	0.965815	5	11.2749	0.918427	5	6.72222	1.02157	5	1.63778	1.04842	5	5.00247	1.07234	5	1.3966	1.03959	5	1.80304	0.997833	5	2.82354	0.965125	5	3.3522	0.929624	5	7.65929	0	7.461e-10	92.22	1.80537e-08	2	1778.97	2.23876	83.9685	0
High	vFASEMNAGIIk	2	1	1	Q5PPJ6	N-Term(TMT10); K12(TMT10)	0	0.831278	2	9.33193	0.874749	2	5.65146	1.04244	2	6.0406	1.07959	2	6.66154	1.0591	2	5.48004	1.04891	2	0.0225117	1.07991	2	1.33105	1.06519	2	0.481478	0.815824	2	15.1974	0	2.109e-09	92.14	1.90003e-08	2	1738	2.14093	83.8163	0
High	tEQDLALGTDAEGQR	1	1	1	Q99PV2	N-Term(TMT10)	0	1.00534	1		1.0283	1		0.984204	1		0.983434	1		1.0049	1		0.992103	1		1.07286	1		1.03325	1		0.932616	1		0	5.444e-12	92.14	7.69787e-09	2	1832.92	2.41803	59.275	0
High	aLGQNPTNAEVLk	3	5	1	A0A0G2K6J5	N-Term(TMT10); K13(TMT10)	0	1.00611	3	1.99792	0.992606	3	1.55847	0.971995	3	1.08435	1.03938	3	1.27899	0.989108	3	5.14751	1.00226	3	4.79056	1.0055	3	2.62047	1.02972	3	0.212798	0.957532	3	2.60048	0	4.127e-10	92.12	1.56816e-08	2	1813.06	1.93151	65.6321	0
High	rEDPGDNWEEGGGGSGAEk	1	2	1	A0A0G2K0B0	N-Term(TMT10); K19(TMT10)	0	0.947415	1		0.907498	1		1.0029	1		0.956923	1		1.13269	1		0.981662	1		1.08733	1		1.07848	1		0.910678	1		0	1.255e-13	92.11	4.15244e-09	3	2405.14	0.572352	53.3958	1
High	eLSTTLNADEAVTR	3	2	1	O88600	N-Term(TMT10)	0	0.895341	3	0.623685	0.935482	3	6.17967	1.03087	3	0.0467661	1.06107	3	2.27955	0.999589	3	1.23771	1.04507	3	1.57296	1.04216	3	5.63882	1.05418	3	1.6124	0.855886	3	0.70812	0	8.024e-11	92.09	1.3071e-08	2	1748.93	1.84667	65.518	0
High	yADLTEDQLPScESLk	6	1	1	P25113	N-Term(TMT10); C12(Carbamidomethyl); K16(TMT10)	0	0.990779	6	7.28885	1.00926	6	5.15235	1.01676	6	1.90133	1.10351	6	2.03731	0.92423	6	1.96582	1.10764	6	4.18928	0.884093	6	3.28207	0.905531	6	3.76326	1.03484	6	8.70288	0	6.782e-12	92.09	1.18659e-08	2	2327.19	2.18602	80.5101	0
High	nYQMASITSPSLVVEcGGER	2	2	1	D4ACN7	N-Term(TMT10); C16(Carbamidomethyl)	0	0.914017	2	2.47292	0.882449	2	1.95699	1.05496	2	3.82157	0.923186	2	2.26147	1.16711	2	6.75116	0.845276	2	3.6256	1.23471	2	0.395733	1.14559	2	0.0437147	0.842674	2	6.1003	0	1.537e-12	92.09	7.478e-09	2	2427.18	-0.519158	81.6624	0
High	kAEAATEAcQLPTSSGDAGR	1	1	1	Q4V8B2	N-Term(TMT10); K1(TMT10); C9(Carbamidomethyl)	0	1.15066	1		1.10001	1		0.869371	1		0.856115	1		0.944513	1		0.978743	1		0.936612	1		0.936767	1		1.45408	1		0	4.769e-14	92.04	1.39101e-08	3	2478.27	2.90007	54.2079	1
High	qAVTNPNNTFYATk	3	2	1	F1M953	N-Term(TMT10); K14(TMT10)	0	0.720148	3	4.79391	0.769892	3	7.09201	1.0824	3	2.10103	1.11918	3	4.93795	1.08482	3	2.95531	1.12742	3	1.20032	1.06773	3	4.12067	1.08953	3	0.22631	0.779814	3	19.877	0	1.583e-11	92.01	1.92314e-08	2	2027.1	1.25657	62.7802	0
High	aTAAEATPGPGVTADAASIVk	3	2	1	P40615	N-Term(TMT10); K21(TMT10)	0	0.856194	3	4.14255	0.897901	3	8.23197	1.01685	3	1.19627	1.05301	3	0.585308	1.03461	3	1.75369	1.07638	3	0.216252	0.995537	3	2.50802	1.03612	3	0.433528	0.992452	3	4.35265	0	4.25e-12	91.97	1.83928e-08	2	2356.32	3.01418	74.3867	0
High	eRPAAAVSAPcAAAEDAAILYSR	4	2	1	A0A0G2JZI2	N-Term(TMT10); C11(Carbamidomethyl)	0	0.953418	4	5.44956	0.833863	4	8.29369	0.981557	4	4.92313	1.0785	4	2.15749	1.07176	4	3.70382	1.08058	4	2.29939	0.986515	4	1.66379	1.04216	4	1.39266	0.899591	4	8.05079	0	1.313e-17	91.95	1.32759e-08	2	2589.32	-2.72816	78.3635	0
High	vVHAFDMEDLGDk	4	1	1	B0K020	N-Term(TMT10); K13(TMT10)	0	0.916692	4	3.81269	0.944945	4	7.78758	1.01712	4	5.51305	1.03549	4	1.11089	1.01144	4	1.9803	1.06189	4	0.790527	0.989943	4	1.7318	0.999993	4	4.60371	0.968344	4	7.02121	0	2.139e-10	91.94	1.4426e-08	2	1934.01	1.32119	80.1409	0
High	nLNEDDTSLVFSk	2	3	1	A0A0G2JVK4	N-Term(TMT10); K13(TMT10)	0	1.08132	2	6.29645	1.02229	2	4.56561	0.983861	2	2.22763	0.912405	2	1.91607	1.05361	2	4.70327	0.962894	2	3.96373	1.07324	2	0.108484	1.02986	2	1.5775	0.955523	2	8.56864	0	8.26e-11	91.94	1.73048e-08	2	1940.04	1.57924	81.2027	0
High	iDSLSAQLSQLQk	5	7	1	G3V8L3	N-Term(TMT10); K13(TMT10)	0	1.01533	5	15.7818	1.08285	5	4.62804	0.969647	5	2.8795	0.958273	5	6.07301	1.00725	5	6.47228	0.978969	5	5.61672	1.02244	5	1.79331	1.01162	5	2.04193	0.985177	5	7.57193	0	2.837e-10	91.91	1.97116e-08	2	1889.11	1.63246	86.709	0
High	mAkPEEVLVVENDQGEVVR	2	1	1	Q80U96	N-Term(TMT10); K3(TMT10)	0	0.983587	2	4.33686	0.933421	2	0.821188	0.997477	2	1.86481	1.03199	2	1.19227	0.995257	2	3.98164	1.02489	2	0.929246	1.04186	2	0.755878	1.04566	2	2.31326	0.93924	2	0.054553	0	1.217e-13	91.88	2.24752e-08	2	2599.42	2.01479	75.7767	0
High	dFLAGGIAAAVSk	2	2	1	Q05962	N-Term(TMT10); K13(TMT10)	0	0.976826	2	13.0782	0.942807	2	3.16569	1.03658	2	0.509012	1.04425	2	0.344823	1.01715	2	1.8128	1.02488	2	4.51087	0.963831	2	3.14235	1.00678	2	5.04033	0.968831	2	1.07133	0	1.187e-09	91.86	2.06566e-08	2	1678	1.02494	87.8915	0
High	qLNNLALLcQNQGk	3	4	1	A0A140TAB3	N-Term(TMT10); C9(Carbamidomethyl); K14(TMT10)	0	1.10227	3	11.9429	1.08835	3	7.63188	0.986949	3	3.23019	0.969484	3	2.83959	0.920695	3	6.73255	1.01459	3	3.63355	0.947084	3	3.96061	0.993805	3	4.19768	1.1222	3	1.38511	0	6.676e-12	91.85	2.25983e-08	2	2072.17	-0.108423	79.5357	0
High	qVAASTAQLLVAck	2	5	2	G3V852;D3ZA84	N-Term(TMT10); C13(Carbamidomethyl); K14(TMT10)	0																												0	4.191e-11	91.84	2.2094e-08	2	1918.12	1.21814	78.8354	0
High	fGIQAQMVTTDFQk	2	1	1	P40112	N-Term(TMT10); K14(TMT10)	0	0.94865	2	5.91554	0.941638	2	1.20431	0.996888	2	2.05795	1.00403	2	3.45195	1.02303	2	1.12739	1.05721	2	2.32242	1.087	2	0.187109	1.02225	2	7.67397	0.896655	2	6.22941	0	9.38e-12	91.81	2.18846e-08	2	2072.13	1.72017	87.138	0
High	yDYEEVEAEGANk	3	3	1	Q499Q4	N-Term(TMT10); K13(TMT10)	0	1.05398	3	1.83592	1.05913	3	7.58501	1.00395	3	0.569634	1.03329	3	3.48535	0.934339	3	5.65807	1.00807	3	0.686063	0.951122	3	2.4157	0.949396	3	3.36651	1.05382	3	2.5637	0	1.399e-10	91.79	8.60881e-09	2	1974.97	1.75538	66.371	0
High	aSLGSLEGEAEAETSSPk	3	2	1	A0A0G2JUA5	N-Term(TMT10); K18(TMT10)	0	1.21294	3	0.491828	1.32799	3	8.67312	0.917073	3	0.0527769	0.941375	3	1.33248	0.860637	3	3.28471	0.970163	3	0.0872493	0.781696	3	9.04344	0.83794	3	7.51344	1.37081	3	4.84538	0	2.277e-14	91.79	1.48005e-08	2	2221.16	1.48228	77.5846	0
High	lGSTAPQVLNTSSPAQQAENEAk	2	2	1	O35987	N-Term(TMT10); K23(TMT10)	0	0.917517	2	6.18674	0.932012	2	7.87929	1.02427	2	1.11312	1.01528	2	6.0003	1.06902	2	3.61238	1.01423	2	2.59814	1.089	2	11.5051	0.994256	2	1.58917	0.914777	2	6.55842	0	5.266e-14	91.78	2.0211e-08	3	2799.49	0.9416	72.4654	0
High	vDIDVPDVDVQGPDWHLk	9	3	1	A0A0G2JUA5	N-Term(TMT10); K18(TMT10)	0	1.19548	9	10.3169	1.22373	9	9.89692	0.918163	9	6.3179	0.966575	9	3.41627	0.899326	9	6.33581	0.93184	9	1.53045	0.87311	9	10.4544	0.911874	9	5.87786	1.24093	9	6.0838	0	3.193e-10	91.76	2.10711e-08	3	2505.34	2.34639	87.2019	0
High	fGAVWTGDNTAEWDHLk	4	1	1	D3ZAN3	N-Term(TMT10); K17(TMT10)	0	0.921714	4	0.824423	0.915363	4	4.35522	1.04752	4	0.950954	1.01562	4	3.15031	1.03474	4	3.04193	1.0477	4	2.26187	1.0585	4	2.03049	1.03127	4	2.74212	0.892775	4	2.46257	0	8.305e-12	91.75	1.22975e-08	3	2405.23	2.28126	86.2938	0
High	tINEVENQILTR	4	8	2	Q9QXQ0;Q6GMN8	N-Term(TMT10)	0																												0	4.542e-09	91.73	1.96729e-08	2	1658.93	2.21627	80.5531	0
High	eQADFAIEALAk	16	7	2	G3V6P7;F1LNF0	N-Term(TMT10); K12(TMT10)	0																												0	1.717e-09	91.73	2.01093e-08	2	1764	1.86109	86.5137	0
High	yQVGVHYELTEEEk	4	3	1	F1LRT9	N-Term(TMT10); K14(TMT10)	0	1.00928	4	4.89357	0.956867	4	2.92401	0.960908	4	3.69642	1.01255	4	1.06476	0.960478	4	3.25758	1.06595	4	4.49915	0.964252	4	4.86655	1.01653	4	6.11968	1.09128	4	5.24152	0	2.444e-12	91.72	1.61514e-08	2	2182.15	1.16136	66.0239	0
High	eGNALFTFPNTPVk	3	1	1	B0BMT9	N-Term(TMT10); K14(TMT10)	0	0.795697	3	0.459246	0.761309	3	0.491986	1.15621	3	0.0810104	1.18103	3	3.06506	0.989924	3	3.3533	1.17529	3	2.94631	0.991546	3	0.469292	1.02857	3	7.17033	0.789506	3	6.78069	0	1.944e-10	91.69	2.25993e-08	2	1993.12	0.33588	87.2521	0
High	cTGGEVGATSALAPk	3	4	1	P23358	N-Term(TMT10); C1(Carbamidomethyl); K15(TMT10)	0	1.04903	3	5.79831	1.03562	3	6.03449	1.05757	3	1.16314	1.00572	3	1.63471	0.952441	3	1.54285	0.974086	3	3.97005	0.992584	3	0.632779	1.02853	3	4.66757	0.980495	3	0.176191	0	4.858e-12	91.63	2.11274e-08	2	1877.02	1.02028	60.0223	0
High	lASAFTEEQAVLYNQR	2	1	1	B2RYI2	N-Term(TMT10)	0	0.855843	2	1.67911	0.863973	2	4.6658	0.961215	2	5.64806	1.0118	2	8.22733	1.09868	2	3.21068	1.11793	2	10.1779	1.05113	2	7.74032	1.10774	2	3.85202	0.857312	2	0.0182558	0	1.794e-13	91.6	1.57392e-08	2	2069.09	1.02332	86.7278	0
High	sMTQEAFQESSVk	2	1	1	D3ZTT7	N-Term(TMT10); K13(TMT10)	0	1.01087	2	7.92474	1.03091	2	15.6304	1.00042	2	1.73264	0.984073	2	1.84546	0.954407	2	2.44667	1.00124	2	0.796254	1.0119	2	8.1377	0.983082	2	13.5825	1.06498	2	0.867934	0	1.414e-10	91.58	1.22324e-08	2	1930	2.1763	65.313	0
High	aGEASAESTGAADGAPQEEGEAk	6	1	1	Q05175	N-Term(TMT10); K23(TMT10)	0	1.01103	6	8.30575	1.15618	6	7.55009	0.932307	6	3.95128	0.971006	6	3.71953	0.976382	6	1.80382	0.928894	6	6.95606	1.01646	6	8.03719	1.01786	6	10.1221	1.12716	6	8.05624	0	4.038e-13	91.56	8.02967e-09	4	2591.25	2.17546	50.8412	0
High	aQAEAQQPVFNTLR	2	13	1	Q6S3A0	N-Term(TMT10)	0	0.936901	2	5.55489	1.04597	2	5.6257	1.01355	2	4.59628	1.03348	2	6.56792	1.00275	2	2.07615	1.02097	2	6.66656	0.983115	2	1.2142	0.939651	2	4.54275	1.03645	2	0.510233	0	5.612e-11	91.55	1.81959e-08	2	1801.98	2.09689	64.1921	0
High	gPEVDVDVGDVDIEcPEGk	3	2	1	A0A0G2JUA5	N-Term(TMT10); C15(Carbamidomethyl); K19(TMT10)	0	1.13544	3	4.74143	1.16388	3	10.6907	0.931766	3	2.95002	0.951688	3	4.28642	0.932989	3	8.72517	0.988964	3	4.75746	0.969802	3	2.62023	0.899761	3	3.69804	1.17058	3	13.0586	0	2.187e-13	91.52	1.0817e-08	2	2487.24	1.60442	82.906	0
High	cEGINISGNFYR	2	3	1	Q5RK10	N-Term(TMT10); C1(Carbamidomethyl)	0	0.989042	2	5.18962	0.944975	2	9.87153	1.05245	2	3.12309	0.964733	2	4.73348	1.1326	2	9.35877	0.831921	2	3.84136	1.19424	2	9.01063	1.09911	2	0.507045	0.806007	2	15.6928	0	2.476e-09	91.51	6.56875e-09	2	1658.82	2.34652	73.4291	0
High	kVWLDPNETNEIANANSR	2	1	1	P84100	N-Term(TMT10); K1(TMT10)	0	1.01512	2	4.02749	1.02775	2	0.987088	1.00306	2	7.51296	1.03245	2	0.462087	1.01698	2	0.406347	1.0624	2	1.33938	0.936765	2	0.438494	0.912069	2	4.94229	1.00768	2	6.40356	0	4.219e-13	91.42	2.23543e-08	3	2529.35	1.43213	73.0536	1
High	vLEEEAGSSEVPETEAEETETR	1	1	1	A0A0G2K6R8	N-Term(TMT10)	0	0.994751	1		0.982817	1		0.972138	1		1.00968	1		0.957216	1		1.00793	1		1.02568	1		1.0478	1		1.03947	1		0	9.564e-13	91.41	4.04751e-09	3	2650.24	0.695091	67.1166	0
High	sIQEIQELDkDDESLR	8	1	1	Q5XI73	N-Term(TMT10); K10(TMT10)	0	0.923973	8	6.0947	0.921242	8	2.93792	1.03231	8	4.18157	1.07068	8	4.08547	0.971732	8	9.31644	1.09651	8	6.03754	0.972403	8	5.09791	1.01264	8	7.79012	0.944647	8	4.58709	0	1.027e-12	91.4	2.09724e-08	2	2376.27	1.5291	75.5501	1
High	lQGNIGMDDAcASk	3	3	1	A0A0G2JUA5	N-Term(TMT10); C11(Carbamidomethyl); K14(TMT10)	0	1.27787	3	6.071	1.28642	3	2.17478	0.919594	3	0.428591	0.931329	3	1.12743	0.929906	3	6.90048	0.898621	3	5.14724	0.877829	3	0.592965	0.905846	3	0.705485	1.22569	3	1.13888	0	1.946e-11	91.38	1.39006e-08	2	1937.99	2.14276	65.3411	0
High	qASPSIVIALAGNk	2	1	1	A1L1J8	N-Term(TMT10); K14(TMT10)	0	0.996605	2	5.10445	1.07083	2	1.77393	1.03289	2	4.02435	0.969052	2	2.82824	1.00354	2	1.42678	0.969578	2	2.36609	1.03363	2	3.61732	0.989625	2	1.00728	0.978408	2	6.4315	0	3.193e-11	91.33	1.47978e-08	2	1827.11	1.49497	83.4889	0
High	dLGLSESGEDVNAAILDESGkk	3	2	1	G3V6T7	N-Term(TMT10); K21(TMT10); K22(TMT10)	0	1.12647	3	9.65415	1.18895	3	6.80552	0.943249	3	0.534579	0.981871	3	3.61018	0.877983	3	3.22429	1.01143	3	1.14572	0.912348	3	2.90049	0.916026	3	2.99962	1.17602	3	0.126512	0	2.323e-16	91.22	2.38609e-08	3	2934.59	1.98346	83.8501	1
High	eGGQVYGTMGGMLIR	2	2	1	A0A023ILN9	N-Term(TMT10)	0	1.02812	2	8.68949	1.07558	2	1.06479	0.982155	2	2.54529	1.04445	2	2.02695	0.903637	2	1.15858	1.10306	2	1.62201	0.962466	2	2.81651	0.925805	2	12.0773	0.986007	2	1.61361	0	3.277e-12	91.11	1.53343e-08	2	1797.92	1.97431	81.363	0
High	sEDDVSGAGELSAEELk	2	2	1	Q1PS21	N-Term(TMT10); K17(TMT10)	0	1.24909	2	17.5348	1.32337	2	22.0392	0.951896	2	14.8049	0.952786	2	5.74462	0.869277	2	13.1051	0.922964	2	5.63729	0.803672	2	16.567	0.810878	2	7.57182	1.30137	2	18.665	0	1.612e-14	91.1	1.47875e-08	2	2194.12	1.46259	72.5084	0
High	lIHEGGAHIYVcGDAR	6	1	1	P00388	N-Term(TMT10); C12(Carbamidomethyl)	0	0.974403	6	12.6242	0.977339	6	10.954	1.04757	6	4.99098	1.00341	6	1.71973	0.961097	6	7.24417	1.00945	6	9.49241	1.00156	6	2.64855	0.949121	6	4.04736	1.04137	6	4.5144	0	1.352e-11	91.08	1.42709e-08	2	1997.03	4.15217	60.3963	0
High	kAEATASALADADADLEER	3	1	1	B2RZB5	N-Term(TMT10); K1(TMT10)	0	1.02187	3	1.67196	0.949758	3	2.16755	1.02787	3	2.49272	0.999614	3	1.81865	0.996395	3	2.31188	1.03979	3	3.83066	0.955806	3	5.85264	0.969995	3	4.25383	0.963345	3	3.09035	0	1.845e-13	91.08	1.86769e-08	3	2405.26	2.91919	73.4556	1
High	dQGTYEDYVEGLR	4	4	1	A0A0G2K6J5	N-Term(TMT10)	0	0.93025	4	3.54562	0.962428	4	7.52044	0.986412	4	1.56498	1.04265	4	2.9603	1.06373	4	4.36305	0.989009	4	4.06544	0.988957	4	3.14785	1.03168	4	1.89088	0.939747	4	10.0662	0	6.526e-10	91.05	4.75068e-09	2	1773.85	1.35799	76.4798	0
High	iFVGGLNPEATEEk	4	4	1	Q9QX80	N-Term(TMT10); K14(TMT10)	0	1.04516	4	4.34237	0.994627	4	2.77265	1.00392	4	4.43615	1.03621	4	2.28613	0.991434	4	3.92384	1.02705	4	1.96743	0.960758	4	3.23004	0.944371	4	1.70065	1.05361	4	6.33684	0	3.293e-11	91.01	2.59148e-08	2	1962.1	0.311546	82.5294	0
High	lESLQQQLQASNEAR	2	2	1	F7FF45	N-Term(TMT10)	0	1.11574	2	1.1371	1.03902	2	0.19226	1.0032	2	0.242297	0.868056	2	2.63959	1.05036	2	1.18566	0.946124	2	1.17391	1.0589	2	0.60692	1.00433	2	0.411399	1.0231	2	0.883894	0	4.914e-12	90.99	2.03817e-08	2	1944.04	1.05941	75.4938	0
High	fDHILYTGNTAVGk	2	3	1	G3V9W6	N-Term(TMT10); K14(TMT10)	0	0.998865	2	5.64234	0.97456	2	0.259717	0.984212	2	3.27943	1.0661	2	5.24929	0.956368	2	3.30287	1.08784	2	5.73624	0.908094	2	7.05086	0.978261	2	3.17299	1.04088	2	7.77637	0	1.9e-11	90.94	2.55708e-08	2	1994.11	0.891292	75.4921	0
High	aGVNTVTTLVENk	5	8	1	F1M013	N-Term(TMT10); K13(TMT10)	0	0.993178	5	6.43055	1.05627	5	1.15982	0.993197	5	5.05743	1.06393	5	4.28215	0.980634	5	5.31626	1.0306	5	3.47912	0.991704	5	9.77864	1.007	5	4.53694	1.03512	5	9.90782	0	4.747e-10	90.92	2.67406e-08	2	1804.06	1.45297	81.6458	0
High	eTFGVNNTVYGIDAMNPSSR	1	1	1	A0JPM9	N-Term(TMT10)	0	0.843284	1		0.890242	1		0.989507	1		1.02402	1		1.06338	1		1.05537	1		1.0302	1		1.16622	1		0.883421	1		0	6.149e-15	90.84	7.45845e-09	2	2401.17	-0.12598	82.9877	0
High	vEDGSFPSGGNTVSVNLASSk	2	2	1	Q5XHX3	N-Term(TMT10); K21(TMT10)	0	0.976102	2	2.0493	0.976926	2	0.939462	0.988169	2	4.15042	1.03446	2	4.05936	0.99743	2	0.580539	1.07661	2	0.913863	0.984076	2	0.42242	0.970208	2	1.29644	0.993118	2	1.61359	0	2.95e-15	90.83	2.20965e-08	2	2510.32	2.15839	76.7147	0
High	mYAPAWVAPEALQk	1	1	1	Q99J82	N-Term(TMT10); K14(TMT10)	0	1.10328	1		1.17936	1		0.952434	1		0.995621	1		0.91425	1		0.979971	1		0.960759	1		0.8991	1		1.14054	1		0	2.215e-09	90.8	2.65749e-08	2	2033.13	1.34986	87.6318	0
High	eAGGGGVGGPGAk	2	1	1	Q6AXS5	N-Term(TMT10); K13(TMT10)	0	1.01893	2	0.0473624	1.05961	2	8.73924	0.940704	2	1.5871	0.975458	2	11.91	1.03839	2	0.683819	0.961932	2	5.71919	1.09236	2	2.32476	1.00661	2	6.05954	0.970372	2	7.35316	0	1.296e-10	90.79	2.09671e-08	2	1471.83	1.87808	44.5024	0
High	sHQVLLQSQLAEk	1	1	1	P41542	N-Term(TMT10); K13(TMT10)	0	1.0822	1		1.01409	1		1.03432	1		0.968177	1		0.975618	1		0.972946	1		1.01046	1		0.973445	1		1.02994	1		0	3.846e-11	90.79	2.42184e-08	2	1939.14	2.2072	60.9069	0
High	sVMDATQIAGLNcLR	2	2	1	O88600	N-Term(TMT10); C13(Carbamidomethyl)	0	0.965225	2	2.00532	0.978797	2	6.21894	1.07402	2	0.507523	1.10801	2	0.192936	0.951948	2	0.0374564	1.09464	2	1.01739	0.941309	2	0.232819	0.942952	2	5.59345	0.874209	2	1.0845	0	6.566e-11	90.76	1.94335e-08	2	1877.98	1.12065	84.3587	0
High	eFSAPSTPTGTLEFAGGEGk	4	2	1	A0A0G2JUA5	N-Term(TMT10); K20(TMT10)	0	1.12722	4	2.79623	1.17959	4	2.97356	0.986666	4	2.72097	0.952266	4	3.04717	0.933209	4	0.902679	0.973063	4	4.29182	0.915995	4	3.18653	0.924231	4	4.45695	1.15502	4	7.21615	0	5.755e-11	90.76	2.09865e-08	2	2441.26	1.26406	82.5968	0
High	aEEQEPELTSTPNFVVEVTk	3	1	1	O35796	N-Term(TMT10); K20(TMT10)	0	0.802372	3	3.36325	0.79012	3	0.791525	1.04717	3	1.06532	1.1261	3	0.0870758	1.01	3	1.57458	1.13912	3	9.73883	1.04167	3	1.22516	1.0737	3	7.07509	0.855906	3	5.2576	0	1.977e-12	90.74	2.41615e-08	2	2705.43	0.395427	86.1764	0
High	aEAQAQAEAEAR	2	4	1	A0A0G2K174	N-Term(TMT10)	0	1.10536	2	3.35118	1.06674	2	0.354532	1.02051	2	6.49679	0.956282	2	8.46611	0.954403	2	4.53374	0.994586	2	9.53955	0.9528	2	1.95034	0.876868	2	5.04358	1.16206	2	7.76659	0	5.342e-10	90.72	9.23478e-09	2	1473.75	1.31579	45.6922	0
High	gYGYGQGAGTLSMDk	3	1	1	P47875	N-Term(TMT10); K15(TMT10)	0	1.01369	3	2.20507	1.03133	3	0.763423	0.891108	3	1.2776	1.05664	3	0.401971	0.946638	3	4.39703	1.03248	3	3.01582	0.922017	3	5.20865	1.03932	3	2.89123	1.16071	3	3.32256	0	7.762e-13	90.67	1.43982e-08	2	1963	0.479154	67.7431	0
High	iGGVQQDTILAEGLHFR	3	2	1	Q5XIH7	N-Term(TMT10)	0	0.939038	3	5.60084	0.875015	3	3.88118	1.00395	3	2.75142	1.02513	3	1.58197	1.08194	3	4.16212	1.03454	3	2.28399	1.01038	3	3.23222	1.04147	3	1.14882	0.982809	3	6.81389	0	5.048e-14	90.67	2.4597e-08	2	2083.15	1.45756	84.7257	0
High	qGAIVAVTGDGVNDSPALk	3	3	1	P06685	N-Term(TMT10); K19(TMT10)	0	0.86052	3	8.15593	0.893903	3	2.56168	1.02754	3	1.58716	0.990596	3	1.84802	1.08426	3	0.368377	1.00291	3	1.1682	1.06726	3	1.56612	1.10331	3	3.43148	0.890582	3	1.55752	0	1.061e-13	90.65	2.75518e-08	2	2270.28	0.084221	76.1061	0
High	sVLAETEGILQk	3	1	1	D4A4Z9	N-Term(TMT10); K12(TMT10)	0	0.91765	3	2.42332	0.948075	3	1.81915	1.07319	3	2.26126	1.04338	3	0.825068	1.00508	3	0.0678711	1.04091	3	1.57268	1.01179	3	0.389919	1.01567	3	3.73228	0.931018	3	8.80749	0	1.539e-09	90.64	2.8392e-08	2	1746.04	1.42353	86.4442	0
High	vTMFLTDSNNIk	2	1	1	Q5XIM7	N-Term(TMT10); K12(TMT10)	0	0.871661	2	2.39439	0.926288	2	6.88504	1.047	2	0.716478	1.02545	2	4.94667	1.02697	2	3.0593	1.03353	2	2.73985	1.04666	2	1.67468	1.01838	2	3.30774	0.959624	2	13.8325	0	1.157e-09	90.62	2.60956e-08	2	1841.03	2.44477	87.0719	0
High	mDTDLETMDLDQGGEALAPR	1	2	1	M3ZCQ2	N-Term(TMT10)	0	1.03087	1		1.03413	1		0.993847	1		1.04056	1		0.896955	1		1.04077	1		1.00901	1		0.976021	1		1.00436	1		0	2.494e-14	90.61	3.64963e-09	2	2407.13	-0.147023	86.0396	0
High	lQVSSVLSQPLAQAAVk	2	2	1	A0A0G2K757	N-Term(TMT10); K17(TMT10)	0	0.945464	2	17.3126	1.0222	2	4.17343	1.047	2	3.15881	1.087	2	1.65767	0.933428	2	7.53975	1.05217	2	1.89555	0.925293	2	6.86808	0.989127	2	2.81671	0.96266	2	4.93116	0	1.808e-13	90.58	1.64059e-08	2	2197.34	1.9879	87.4317	0
High	qPAIMPGQSYGLEDGScSYk	5	4	1	F1LQ48	N-Term(TMT10); C17(Carbamidomethyl); K20(TMT10)	0	1.02371	5	9.6648	1.09399	5	6.96279	0.933131	5	2.74428	1.00844	5	1.83621	0.9187	5	5.30142	1.04059	5	0.88604	0.949936	5	8.60795	0.989696	5	8.12631	1.07731	5	4.30589	0	6.457e-14	90.57	1.20588e-08	2	2646.3	0.462003	75.8379	0
High	ePNSENVDISSGGGVTGWk	2	3	1	Q5RKJ9	N-Term(TMT10); K19(TMT10)	0	0.849645	2	6.15024	0.930098	2	3.21808	0.988361	2	2.78966	1.01385	2	7.55847	1.08111	2	1.69176	1.02614	2	3.64342	1.08822	2	1.63353	1.0539	2	2.32144	0.939891	2	0.776099	0	2.426e-15	90.56	1.81958e-08	2	2391.22	1.61291	73.8741	0
High	tAVTTVPSMGIGLVk	1	1	1	B2RZ08	N-Term(TMT10); K15(TMT10)	0	0.978795	1		1.01733	1		1.03495	1		1.00005	1		0.913886	1		1.03917	1		0.995726	1		0.990311	1		1.04965	1		0	1.353e-08	90.5	2.24595e-08	2	1932.16	1.43896	85.9188	0
High	lTESPcALVASQYGWSGNMER	4	2	1	A0A0A0MY09	N-Term(TMT10); C6(Carbamidomethyl)	0	1.11104	4	10.4921	1.11213	4	12.7983	0.966569	4	2.22659	0.987782	4	2.54042	0.920641	4	3.11247	1.03782	4	1.72688	0.891922	4	6.32586	0.93531	4	4.82418	1.09376	4	3.54143	0	1.863e-15	90.4	5.19846e-09	2	2585.24	1.43059	86.651	0
High	hIDcAYAYcNENEVGEAIQEk	4	3	2	G3V786;Q91W30	N-Term(TMT10); C4(Carbamidomethyl); C9(Carbamidomethyl); K21(TMT10)	0																												0	5.993e-13	90.4	5.65447e-09	3	2971.4	0.36581	73.3548	0
High	aDcASGVFLAAEk	2	1	1	B2RYN6	N-Term(TMT10); C3(Carbamidomethyl); K13(TMT10)	0	1.06352	2	5.02848	1.08875	2	7.40786	0.977491	2	2.26854	1.00405	2	0.240467	0.94635	2	4.31698	1.04159	2	1.57564	0.926227	2	4.36564	0.95061	2	2.32739	1.06255	2	5.07307	0	6.45e-10	90.39	2.49096e-08	2	1796.96	-0.23261	75.9293	0
High	aMDSDWFAQNYMGR	2	2	1	Q60587	N-Term(TMT10)	0	0.950161	2	1.9728	1.02006	2	2.03256	0.978911	2	2.21278	1.06955	2	2.70862	0.937582	2	0.596674	1.10522	2	0.131703	0.945002	2	5.95839	0.940834	2	9.07804	1.04499	2	5.8079	0	1.865e-10	90.38	1.92406e-09	2	1920.86	1.58873	86.5997	0
High	gISQEQMNEFR	1	3	1	Q6GMN8	N-Term(TMT10)	0	0.988204	1		1.0111	1		1.02026	1		1.08649	1		0.965212	1		1.03988	1		0.976275	1		0.87763	1		1.03873	1		0	1.193e-08	90.36	8.46814e-09	2	1567.78	1.20361	62.7935	0
High	tQQAAQANITLQEQIEAIHk	2	1	1	D3ZQM0	N-Term(TMT10); K20(TMT10)	0	1.05571	2	6.06607	0.942949	2	7.78529	0.978145	2	0.275782	0.981747	2	4.38275	1.03193	2	6.92274	0.945877	2	0.297856	1.0208	2	5.81872	1.02633	2	1.29574	1.07373	2	20.1155	0	5.556e-13	90.36	2.4668e-08	3	2693.5	0.708819	77.9616	0
High	mGAVFMDAPVSGGVGAAR	1	1	1	P29266	N-Term(TMT10)	0	0.972847	1		0.963226	1		1.0034	1		0.968426	1		1.12304	1		0.919923	1		1.08899	1		1.08647	1		0.905914	1		0	2.869e-13	90.32	1.8858e-08	2	1921.99	1.92115	82.8438	0
High	hFcPNVPIILVGNk	5	4	2	P61589;B2RYP0	N-Term(TMT10); C3(Carbamidomethyl); K14(TMT10)	0																												0	1.08e-10	90.31	2.45347e-08	2	2066.2	1.04147	83.5872	0
High	aSSSILINEAEPTTNIQIR	2	2	1	O35987	N-Term(TMT10)	0	0.957126	2	0.441427	0.841749	2	30.8385	1.03884	2	2.31038	1.01563	2	12.3976	1.01201	2	1.32743	1.02489	2	10.5114	1.02105	2	5.1996	1.06315	2	6.61099	0.973722	2	0.723929	0	7.245e-13	90.3	3.10774e-08	2	2286.25	1.36567	81.1629	0
High	mIQNAEDVYEAVR	1	1	1	B0BNB9	N-Term(TMT10)	0	0.865358	1		0.927361	1		1.01526	1		1.04547	1		1.0648	1		1.06765	1		1.01151	1		1.05927	1		0.886079	1		0	3.273e-10	90.23	1.68344e-08	2	1766.9	2.31132	83.7171	0
High	eSEPQAAADATEVk	2	2	2	A0A0G2K1L8;Q05175	N-Term(TMT10); K14(TMT10)	0																												0	7.662e-12	90.23	2.17188e-08	2	1904	0.643789	57.0072	0
High	dLLVQQASQcLSk	2	1	1	D4ABT8	N-Term(TMT10); C10(Carbamidomethyl); K13(TMT10)	0	1.50019	2	3.32017	1.51437	2	0.172055	0.953512	2	3.51748	0.982051	2	2.10715	0.609504	2	8.1876	1.03608	2	0.64211	0.623145	2	3.52485	0.643136	2	6.29345	1.43016	2	6.95652	0	2.355e-10	90.23	3.02071e-08	2	1948.1	3.30477	81.3267	0
High	fQDAPSADGESVAGGVTVATASDk	1	6	1	F1LPH1	N-Term(TMT10); K24(TMT10)	0	0.995466	1		0.808036	1		1.04248	1		0.954126	1		1.03481	1		1.00659	1		1.05086	1		1.12997	1		0.968105	1		0	2.521e-13	90.21	2.03422e-08	3	2738.4	2.59633	75.8483	0
High	nSVSQISVLSGGk	2	1	1	O88656	N-Term(TMT10); K13(TMT10)	0	0.951545	2	2.00234	0.96809	2	5.61469	1.01851	2	1.02198	0.95918	2	0.540473	1.09299	2	2.95627	0.924305	2	2.02449	1.10871	2	2.96643	1.07342	2	1.83805	0.929574	2	11.4633	0	3.808e-10	90.12	3.13711e-08	2	1734.02	2.21556	70.2414	0
High	aPDVQLNAPDVDVHGPEWNLk	3	1	1	Q38PF9	N-Term(TMT10); K21(TMT10)	0	1.22197	3	1.93746	1.26893	3	3.99089	0.901484	3	0.416278	0.970662	3	3.95542	0.868947	3	7.11121	0.959862	3	0.299663	0.895064	3	12.0474	0.848702	3	4.97706	1.27626	3	7.05675	0	2.536e-11	90.07	2.79951e-08	3	2772.48	2.24074	84.1594	0
High	yPASTVQILGAEk	1	2	1	Q5RJN5	N-Term(TMT10); K13(TMT10)	0	0.912497	1		0.939474	1		1.01839	1		1.0608	1		1.02083	1		1.07187	1		1.02143	1		0.989825	1		0.919476	1		0	2.23e-10	89.96	3.58285e-08	2	1835.08	3.92112	80.0086	0
High	eLMDEEDVLQEck	1	2	1	D3ZBT9	N-Term(TMT10); C12(Carbamidomethyl); K13(TMT10)	0	1.01235	1		1.05356	1		0.953805	1		1.05583	1		0.933361	1		1.04436	1		0.926311	1		0.992149	1		1.07135	1		0	1.03e-10	89.94	1.13051e-08	2	2096.03	1.78303	80.7996	0
High	scSGVEFSTSGSSNTDTGk	5	1	1	P81155	N-Term(TMT10); C2(Carbamidomethyl); K19(TMT10)	0	0.964404	5	5.80903	0.944068	5	5.78929	0.977194	5	0.974654	0.971692	5	6.15905	1.09213	5	4.28262	1.04205	5	4.8962	1.06402	5	6.98006	1.01611	5	2.03193	0.973228	5	4.85871	0	1.237e-12	89.93	5.74181e-09	3	2366.12	2.57107	59.5565	0
High	gGDGSPGGAGATAAR	1	1	1	Q5XIU9	N-Term(TMT10)	0	1.14273	1		1.12596	1		1.11935	1		1.0269	1		0.839739	1		0.962273	1		0.904016	1		0.959576	1		0.967272	1		0	1.543e-07	89.92	9.4729e-09	2	1430.72	0.633751	31.1462	0
High	vVQVSAGDSHTAALTEDGR	1	1	1	B1H227	N-Term(TMT10)	0	1.05287	1		1.06077	1		0.93365	1		0.945549	1		0.898961	1		1.01195	1		0.963746	1		1.00467	1		1.24822	1		0	1.536e-11	89.91	2.15929e-08	3	2142.11	2.86744	57.6971	0
High	fLIPNASQPESk	5	2	1	P63102	N-Term(TMT10); K12(TMT10)	0	0.980128	5	9.60712	0.992424	5	0.848575	1.05514	5	1.17309	1.01895	5	0.357197	1.02606	5	3.41361	0.997707	5	4.18605	1.0123	5	9.96587	0.963028	5	4.74766	0.85524	5	2.43055	0	4.697e-07	89.9	3.10569e-08	2	1789.03	2.58349	77.8774	0
High	aPQETYADIGGLDNQIQEIk	2	1	1	P62193	N-Term(TMT10); K20(TMT10)	0	0.992924	2	3.53797	1.05623	2	2.1881	0.974158	2	1.78098	1.01603	2	2.17483	0.932251	2	0.815043	1.06822	2	3.19903	0.899118	2	0.546037	0.990393	2	2.88243	1.11339	2	4.84072	0	9.225e-16	89.88	2.82704e-08	2	2661.42	1.44764	86.8269	0
High	vALVYGQMNEPPGAR	12	3	1	G3V6D3	N-Term(TMT10)	0	0.973782	12	5.20234	0.990011	12	3.66629	1.01209	12	6.25482	1.00079	12	6.2419	1.00213	12	6.45326	1.02	12	4.05149	1.04491	12	6.08232	1.06139	12	5.89335	0.922554	12	7.29007	0	3.14e-10	89.87	2.85932e-08	2	1830.98	1.85745	73.851	0
High	aFINLEAAGVGGk	1	2	1	F1M6W2	N-Term(TMT10); K13(TMT10)	0	0.99894	1		0.966774	1		0.967633	1		1.06451	1		0.978506	1		1.02607	1		0.962746	1		1.00503	1		1.05151	1		0	3.203e-10	89.81	3.58861e-08	2	1705.01	1.20252	83.6343	0
High	fNVEDGEIVQQVR	2	1	1	D4A994	N-Term(TMT10)	0	0.922695	2	6.44206	0.921728	2	2.90666	1.06754	2	3.51144	1.0312	2	2.83105	1.0459	2	1.38746	0.985846	2	1.53139	1.07604	2	6.32812	1.05371	2	4.75539	0.849472	2	5.85088	0	2.708e-10	89.79	2.5189e-08	2	1761.94	2.31122	76.4186	0
High	gDMDVAVPEIEGEMk	2	3	1	A0A0G2JUA5	N-Term(TMT10); K15(TMT10)	0	1.10202	2	8.47197	1.19172	2	7.55033	0.923686	2	0.475048	0.966153	2	1.66308	0.916046	2	4.04135	0.965023	2	0.810098	0.917681	2	4.51069	0.940719	2	7.19931	1.23206	2	2.66204	0	5.213e-12	89.79	1.89967e-08	2	2078.06	1.10938	85.1551	0
High	sAcDTVDTWLDDTAk	1	3	1	F1LRT9	N-Term(TMT10); C3(Carbamidomethyl); K15(TMT10)	0	1.01523	1		1.08461	1		1.00533	1		1.03468	1		0.933813	1		1.06402	1		0.929544	1		0.926812	1		1.03589	1		0	7.114e-11	89.79	1.42213e-08	2	2156.06	1.76712	86.7939	0
High	cDGEDDcGDNSDENPEEcTR	2	1	1	G3V928	N-Term(TMT10); C1(Carbamidomethyl); C7(Carbamidomethyl); C18(Carbamidomethyl)	0	0.987553	2	0.03976	0.883489	2	11.0648	1.16304	2	2.53208	1.04348	2	25.0091	0.887188	2	42.7672	1.01455	2	0.363122	1.10787	2	0.937067	1.01802	2	23.2352	0.727511	2	26.3478	0	1.176e-10	89.79	1.04706e-09	3	2602.94	1.63964	41.8584	0
High	lTVSSLQESGLk	4	1	1	C0JPT7	N-Term(TMT10); K12(TMT10)	0	0.990689	4	2.4575	1.00901	4	0.269276	1.03908	4	3.11896	1.05205	4	3.57026	1.03014	4	1.60559	0.994453	4	0.579573	1.0431	4	5.75771	1.0078	4	1.39815	0.904709	4	2.41418	0	3.947e-09	89.77	3.30023e-08	2	1720.03	1.39444	79.0215	0
High	dEGNYLDDALVk	2	1	1	Q5U362	N-Term(TMT10); K12(TMT10)	0	0.960122	2	16.1166	1.02558	2	8.92977	1.0048	2	3.64503	1.04014	2	2.88815	1.0103	2	9.29418	1.01836	2	4.06954	0.990675	2	12.5493	0.929449	2	7.83821	1.02441	2	5.57367	0	8.231e-09	89.71	2.43745e-08	2	1809.97	2.44082	81.9518	0
High	vSAFENPYVDAIk	2	4	1	D4AE68	N-Term(TMT10); K13(TMT10)	0	1.09897	2	0.205038	1.05932	2	0.544503	0.966307	2	0.82121	1.00284	2	1.19568	0.957127	2	2.17727	1.0296	2	2.44855	0.94321	2	0.0338665	0.967605	2	0.312746	1.04415	2	1.55883	0	1.218e-10	89.69	2.94273e-08	2	1911.07	2.07986	86.1433	0
High	kMEDGVGcLETAEEAk	7	2	1	G3V6P7	N-Term(TMT10); K1(TMT10); C8(Carbamidomethyl); K16(TMT10)	0	0.984551	7	0.550144	1.05497	7	2.14823	1.0021	7	2.91312	1.07405	7	1.09998	0.925049	7	2.16484	1.07026	7	4.31961	0.915523	7	3.85314	0.911505	7	6.91774	1.07619	7	3.3692	0	1.911e-14	89.68	3.2886e-08	3	2454.29	2.26816	69.8804	1
High	vGLIGScTNSSYEDMGR	4	1	1	Q9ER34	N-Term(TMT10); C7(Carbamidomethyl)	0	0.904793	4	1.18067	0.963878	4	5.22368	1.00341	4	1.89296	1.04029	4	1.52645	1.04727	4	3.47734	1.05473	4	1.09386	1.02381	4	3.06783	1.00105	4	0.771144	0.8882	4	3.27958	0	2.418e-13	89.66	5.46124e-09	2	2074.98	1.10381	73.4408	0
High	kASGPPVSELITk	7	3	3	P15865;A0A0G2K654;M0R7B4	N-Term(TMT10); K1(TMT10); K13(TMT10)	0																												0	3.12e-11	89.61	1.55342e-08	3	2014.26	1.85523	67.8754	1
High	tSIDAYDNFDNISLAQR	2	2	1	F1M779	N-Term(TMT10)	0	0.929943	2	2.41365	0.897974	2	4.58366	1.02797	2	0.0176334	0.939534	2	0.96127	1.17682	2	5.92958	0.924745	2	3.64582	1.18065	2	4.09794	1.11556	2	1.26642	0.798823	2	0.245922	0	2.56e-12	89.61	1.62999e-08	2	2172.08	1.49928	84.7401	0
High	tVEEAENIVVTTGVVR	3	3	1	A0A0G2K0T6	N-Term(TMT10)	0	1.08911	3	3.82113	1.05195	3	14.2233	0.917677	3	2.71515	0.967324	3	1.66583	0.981992	3	1.29552	0.96653	3	3.7529	0.974854	3	2.22775	1.03746	3	8.55645	0.990734	3	1.04181	0	1.463e-12	89.6	3.21268e-08	2	1945.08	1.667	85.2295	0
High	vETGVLkPGmVVTFAPVNVTTEVk	3	3	1	M0R757	N-Term(TMT10); K7(TMT10); M10(Oxidation); K24(TMT10)	0	0.791382	3	2.59477	0.790895	3	2.07927	0.980874	3	2.19926	0.992554	3	0.361142	1.19805	3	0.417494	0.978997	3	2.91635	1.18921	3	4.69992	1.20945	3	2.24279	0.790473	3	1.82428	0	3.326e-12	89.6	1.57345e-08	3	3218.87	1.10622	85.67	0
High	aPkPDGPGGGPGGSHMGGNYGDDR	4	1	1	Q5PQK2	N-Term(TMT10); K3(TMT10)	0	1.26583	4	1.63334	1.26425	4	10.3716	0.825235	4	1.50124	0.920685	4	2.41009	0.843356	4	9.93048	0.986387	4	4.81729	0.840705	4	12.5586	0.85679	4	9.83043	1.4638	4	9.59079	0	1.532e-15	89.56	1.16749e-08	3	2711.3	1.35529	48.8995	0
High	tLTLVDTGIGmTk	14	4	2	P34058;P82995	N-Term(TMT10); M11(Oxidation); K13(TMT10)	0																												0	2.944e-09	89.53	3.38188e-08	2	1824.06	1.61444	79.9757	0
High	lFIGGLNTETNEk	4	5	1	P84586	N-Term(TMT10); K13(TMT10)	0	1.08657	4	4.844	1.1358	4	5.04015	0.94393	4	2.44691	0.969684	4	0.986123	0.944057	4	0.469383	1.00264	4	3.01956	0.952892	4	4.09109	0.964868	4	2.7197	1.09867	4	8.87364	0	3.185e-10	89.52	3.43994e-08	2	1894.07	1.21703	82.8173	0
High	tDYNASVSVPDSSGPER	4	3	2	P61980;Q5D059	N-Term(TMT10)	0																												0	2.547e-10	89.52	1.04985e-08	2	2009.96	0.637217	59.9226	0
High	tPQISMSDIDLNMk	4	2	1	A0A0G2JUA5	N-Term(TMT10); K14(TMT10)	0	1.20532	4	6.96688	1.27626	4	1.7237	0.943106	4	1.7126	0.931274	4	0.46326	0.915247	4	4.20546	0.895647	4	8.6271	0.932322	4	8.41545	0.929965	4	2.50187	1.18798	4	1.15735	0	1.859e-10	89.49	2.99707e-08	2	2051.1	2.0426	85.9845	0
High	dQTNDQVTIDSALATQk	5	2	1	P56574	N-Term(TMT10); K17(TMT10)	0	0.964015	5	2.13601	1.04937	5	6.41026	1.00914	5	3.14681	0.961614	5	0.559526	0.994145	5	5.7302	1.00149	5	5.00551	1.01923	5	10.2892	0.965983	5	2.03461	1.03882	5	4.13422	0	5.142e-13	89.45	3.33693e-08	2	2306.23	2.0562	72.0994	0
High	aALEALGScLNNk	1	1	1	Q5U3Z7	N-Term(TMT10); C9(Carbamidomethyl); K13(TMT10)	0	0.780785	1		0.761568	1		1.20075	1		1.26925	1		0.862857	1		1.33501	1		0.86303	1		0.881799	1		0.752208	1		0	3.239e-10	89.44	4.06702e-08	2	1819.02	1.78926	82.8289	0
High	aVAGNISDPGLQk	3	3	1	P85972	N-Term(TMT10); K13(TMT10)	0	1.08015	3	14.2597	1.15051	3	4.87333	0.986519	3	1.21547	0.9691	3	3.09192	0.966804	3	3.26107	0.94263	3	1.36459	0.980772	3	4.86766	0.983087	3	6.99618	1.08126	3	12.0427	0	1.236e-09	89.4	3.18613e-08	2	1728.01	1.90012	63.0878	0
High	sLYSSSPGGAYVTR	3	2	1	P31000	N-Term(TMT10)	0	1.02337	3	0.64926	1.03616	3	7.05055	0.956612	3	2.80655	1.00818	3	3.45538	0.986732	3	2.50075	1.03534	3	2.83477	1.08449	3	1.43156	0.965443	3	8.58617	0.960114	3	11.0728	0	1.761e-08	89.38	2.28384e-08	2	1673.87	2.42045	63.3879	0
High	qQLGTSVELEMAk	3	1	1	Q6AXW2	N-Term(TMT10); K13(TMT10)	0	0.972986	3	6.47657	0.958735	3	2.92324	1.0014	3	3.89069	0.972327	3	2.41944	1.03405	3	1.31069	0.990466	3	0.244403	1.05827	3	2.81586	1.0474	3	1.18845	0.966868	3	5.09504	0	6.13e-11	89.38	3.66798e-08	2	1892.06	0.606438	77.0637	0
High	qLDAGEEATVTk	1	2	1	A0A0G2JYL4	N-Term(TMT10); K12(TMT10)	0	1.18954	1		1.21887	1		0.936525	1		0.856231	1		0.981066	1		0.9492	1		0.941254	1		0.910922	1		1.22316	1		0	5.387e-10	89.36	3.41839e-08	2	1719.96	1.39804	61.3156	0
High	vITEYLNAQESAk	2	2	1	D4A8Y5	N-Term(TMT10); K13(TMT10)	0	1.06016	2	8.05751	1.05241	2	4.04404	0.952947	2	0.619071	0.998995	2	2.77643	0.934615	2	5.31257	1.00748	2	2.40948	0.930969	2	0.872701	1.01026	2	0.243011	1.13474	2	2.96676	0	4.043e-10	89.34	3.74849e-08	2	1924.09	4.21632	82.7952	0
High	ePTETPDQFMTADETR	2	5	1	O70509	N-Term(TMT10)	0	0.903086	2	14.761	0.849877	2	0.471613	0.996684	2	9.41086	0.977818	2	3.27497	1.12398	2	4.44489	0.9788	2	2.41654	1.10661	2	7.86857	1.15699	2	8.93096	0.872078	2	7.78133	0	3.186e-10	89.28	4.19014e-09	2	2096.97	1.48004	68.8525	0
High	aEIVPVTTTVLDDk	1	3	1	P21775	N-Term(TMT10); K14(TMT10)	0	0.983504	1		1.01496	1		1.03765	1		0.972328	1		0.975164	1		1.08413	1		1.02843	1		0.939766	1		0.965381	1		0	6.837e-11	89.26	3.19565e-08	2	1959.14	1.63113	85.3898	0
High	gAGAFGYFEVTHDITR	3	1	1	P04762	N-Term(TMT10)	0	0.816979	3	2.50782	0.805937	3	1.66893	1.06512	3	0.867219	1.10356	3	4.01252	0.99406	3	3.0767	1.12719	3	2.22578	1.01698	3	2.47777	1.03886	3	1.00224	0.938032	3	1.9157	0	1.213e-12	89.26	2.1166e-08	2	1970	1.60222	80.5944	0
High	vTVVcEPEDYGAVAAEMQGSGNk	1	1	1	O35567	N-Term(TMT10); C5(Carbamidomethyl); K23(TMT10)	0	0.963647	1		1.00989	1		0.979845	1		1.06997	1		0.998841	1		1.01601	1		0.940245	1		0.993387	1		1.04797	1		0	8.752e-13	89.26	1.90909e-08	3	2869.42	1.91814	83.1449	0
High	vQNMALYADVSGk	2	1	1	Q07984	N-Term(TMT10); K13(TMT10)	0	1.06554	2	0.14616	1.07508	2	1.4449	0.954014	2	1.2612	1.05886	2	3.2078	0.971246	2	3.92591	1.03222	2	1.02647	0.942128	2	1.0767	0.914272	2	2.80929	1.04085	2	2.93127	0	2.222e-10	89.25	3.40506e-08	2	1854.03	3.34361	81.5482	0
High	fGIVTSSAGTGTTEDTEAk	2	1	1	Q498U4	N-Term(TMT10); K19(TMT10)	0	0.994403	2	5.83074	0.956375	2	7.32928	0.988271	2	4.43634	0.933875	2	0.44662	1.03003	2	6.58542	0.999779	2	7.06152	1.08954	2	6.28893	1.10686	2	4.21056	0.923737	2	2.91526	0	4.221e-14	89.25	2.78704e-08	2	2330.22	1.40191	71.341	0
High	iSGADINSIcQESGMLAVR	2	1	1	Q63570	N-Term(TMT10); C10(Carbamidomethyl)	0	0.923859	2	4.52463	0.970426	2	9.61259	1.00675	2	2.34262	0.918138	2	1.407	1.07728	2	7.9269	1.02016	2	3.09909	1.1356	2	5.01578	1.06387	2	6.84356	0.88292	2	4.35894	0	2.065e-13	89.23	2.17306e-08	2	2250.14	1.22023	85.7709	0
High	gHQLLSADVDIk	3	4	1	A0A0G2K6U1	N-Term(TMT10); K12(TMT10)	0	1.03356	3	6.68838	1.05297	3	4.18693	1.00239	3	2.53262	1.03429	3	0.0445626	0.984509	3	7.57951	1.01531	3	2.87352	0.943407	3	5.22274	0.924536	3	2.0383	1.08317	3	12.9962	0	1.279e-09	89.2	3.5587e-08	2	1754.02	2.00258	68.315	0
High	vTGAVDVTcGAVk	3	1	1	M0RA08	N-Term(TMT10); C9(Carbamidomethyl); K13(TMT10)	0	0.940094	3	6.98508	0.925464	3	3.24263	1.04352	3	0.924063	1.04122	3	1.91784	1.0478	3	1.43351	1.00244	3	1.104	1.05789	3	2.22742	1.0242	3	0.612344	0.859718	3	8.3315	0	5.783e-10	89.18	4.38436e-08	2	1734.99	3.78214	65.3444	0
High	aVASAAAALVLk	2	1	1	G3V852	N-Term(TMT10); K12(TMT10)	0	1.01487	2	0.227441	1.01601	2	5.32382	0.954455	2	0.747672	1.01526	2	0.807333	0.991218	2	4.87201	1.02352	2	0.446814	0.983965	2	1.19619	0.996997	2	1.48744	1.05127	2	0.788146	0	6.544e-09	89.11	1.83502e-08	2	1543	2.09281	87.8111	0
High	tTEMETIYDLGTk	1	2	1	G3V8T5	N-Term(TMT10); K13(TMT10)	0	1.00341	1		0.920057	1		1.02262	1		1.02493	1		1.06116	1		1.03048	1		1.03425	1		0.990775	1		0.895359	1		0	8.061e-11	89.1	2.9588e-08	2	1960.04	0.988519	84.7059	0
High	qAIPLDQNEGIYVQDVk	2	2	1	Q62667	N-Term(TMT10); K17(TMT10)	0	0.677653	2	2.78102	0.729019	2	1.72215	1.11573	2	4.18287	1.1451	2	2.2746	1.08353	2	0.398033	1.20553	2	7.82483	1.06322	2	6.20108	1.03713	2	6.09206	0.694753	2	0.729542	0	4.5e-12	89.03	4.40716e-08	2	2388.32	1.26823	80.9335	0
High	tAMSTPHVAEPAENEHDEQDENGAEASAELR	7	3	1	A0A1W2Q6E9	N-Term(TMT10)	0	0.967273	7	10.9081	0.887015	7	21.2389	1.01468	7	3.67989	0.983896	7	2.56971	1.15889	7	8.84447	0.96487	7	5.02045	1.05517	7	4.11229	1.06593	7	6.01805	0.9048	7	12.8559	0	8.163e-15	89	3.08437e-09	4	3564.61	1.95648	56.8022	0
High	aEHDQLLLNYAk	2	2	1	G3V7U4	N-Term(TMT10); K12(TMT10)	0	1.15425	2	4.49589	1.18602	2	8.09442	0.900757	2	2.5562	0.963436	2	0.0606321	0.915638	2	9.47983	0.952609	2	3.42747	0.884728	2	2.60916	0.93753	2	10.1032	1.28514	2	6.59544	0	2.042e-09	88.96	4.00866e-08	2	1873.06	2.53203	67.8258	0
High	gVNIGGAGSYIYEkPPTEAPQVTGPIEVPVVR	4	1	1	P36201	N-Term(TMT10); K14(TMT10)	0	1.38582	4	8.41689	1.45375	4	9.10433	0.79525	4	4.00813	0.87522	4	3.22654	0.798198	4	6.92919	0.938638	4	6.28136	0.773005	4	9.15323	0.778227	4	7.21485	1.59264	4	9.35778	0	2.831e-19	88.95	2.5279e-08	3	3753.07	1.38635	85.8538	0
High	iSEVQTDVSVDTk	1	1	1	Q5RJR2	N-Term(TMT10); K13(TMT10)	0	1.09594	1		1.18347	1		1.0151	1		0.911857	1		0.973743	1		1.03311	1		0.955131	1		0.894562	1		1.03329	1		0	3.298e-10	88.94	3.91867e-08	2	1879.05	1.44132	70.0657	0
High	yNILGTNTIMDk	3	3	1	Q63555	N-Term(TMT10); K12(TMT10)	0	1.09942	3	7.6692	1.08607	3	3.35127	0.977807	3	2.23719	1.01922	3	0.0130292	0.958148	3	1.30846	0.998925	3	7.40245	0.920369	3	1.92643	0.891996	3	2.99744	1.09199	3	3.0976	0	3.481e-09	88.93	3.61425e-08	2	1841.03	1.05779	85.8692	0
High	eAAGEGPVLYEDPPDQk	1	2	1	Q99PF3	N-Term(TMT10); K17(TMT10)	0	0.917298	1		1.0184	1		1.11018	1		1.0711	1		0.832406	1		1.14822	1		0.897863	1		0.87605	1		1.07735	1		0	3.216e-10	88.92	2.7506e-08	2	2273.17	1.59267	66.4884	0
High	kIQVLQQQADDAEER	3	1	1	Q63610	N-Term(TMT10); K1(TMT10)	0	1.04471	3	3.27172	1.04417	3	9.53787	0.979769	3	0.728602	1.06602	3	1.97888	0.996983	3	0.0762501	1.016	3	5.89663	0.937042	3	1.13874	0.91598	3	8.83489	1.09918	3	6.8953	0	1.702e-12	88.87	3.74236e-08	2	2229.23	0.6164	61.7767	1
High	aGVLAHLEEER	5	3	2	G3V6P7;G3V9Y1	N-Term(TMT10)	0																												0	3.676e-07	88.86	3.73799e-08	3	1452.8	1.13648	64.3839	0
High	iESLSSQLSNLQk	1	2	1	G3V7U4	N-Term(TMT10); K13(TMT10)	0	1.16826	1		1.1633	1		0.969842	1		0.985506	1		0.971115	1		0.9503	1		0.900576	1		0.91243	1		1.11498	1		0	1.974e-10	88.82	3.89067e-08	2	1905.11	1.2149	84.6546	0
High	acLISLGYDVENDR	4	3	1	Q9QXQ0	N-Term(TMT10); C2(Carbamidomethyl)	0	1.06734	4	9.02138	1.03643	4	7.65638	0.99571	4	4.21278	1.03755	4	0.676634	0.903825	4	6.52381	1.0644	4	2.81782	0.845161	4	3.95812	0.873594	4	1.69499	1.13607	4	9.96904	0	2.381e-10	88.73	1.75498e-08	2	1853.93	2.18039	84.9969	0
High	tEcYGYALGDATR	1	4	1	P53042	N-Term(TMT10); C3(Carbamidomethyl)	0	1.0016	1		1.00685	1		1.10259	1		1.02797	1		1.0175	1		0.959551	1		1.01413	1		0.977446	1		0.88446	1		0	3.55e-10	88.71	6.05637e-09	2	1705.81	1.78795	63.0233	0
High	mTGSEFDFEEMk	2	1	1	P50399	N-Term(TMT10); K12(TMT10)	0	0.94788	2	2.40268	0.966415	2	1.72445	1.0546	2	1.8216	1.05341	2	0.0352855	1.00017	2	4.09552	1.04844	2	0.59337	1.03763	2	1.06227	0.978745	2	2.88446	0.867365	2	3.93169	0	1.515e-09	88.7	8.22867e-09	2	1908.92	2.15107	85.0333	0
High	eELSNVLAAMR	1	6	1	A0A140TAI6	N-Term(TMT10)	0	0.997241	1		0.97471	1		1.05025	1		0.953542	1		1.03271	1		1.01326	1		1.04461	1		1.05271	1		0.882993	1		0	1.873e-08	88.69	3.45455e-08	2	1461.8	1.18912	87.1671	0
High	vGVTVAQTTMEPHLLEAcVR	1	2	1	Q66H61	N-Term(TMT10); C18(Carbamidomethyl)	0	1.02926	1		1.07159	1		0.933407	1		1.10262	1		0.939368	1		1.0452	1		0.863619	1		0.894519	1		1.18348	1		0	4.983e-13	88.67	3.82365e-08	2	2440.29	2.1144	79.9195	0
High	wQHDLFDSGFGGGAGVETGGk	1	1	1	D3ZXH7	N-Term(TMT10); K21(TMT10)	0	1.10257	1		1.14384	1		0.804484	1		0.998739	1		0.812939	1		1.13182	1		0.917573	1		0.85479	1		1.39304	1		0	2.796e-13	88.63	2.35106e-08	3	2580.29	1.39172	84.8839	0
High	eLISNASDALDk	6	4	2	P34058;A0A0A0MY09	N-Term(TMT10); K12(TMT10)	0																												0	1.078e-08	88.6	4.12735e-08	2	1733.97	1.93551	77.307	0
High	lAQQHAAAAAAAAAATNQQGSAk	1	1	1	D3ZNF4	N-Term(TMT10); K23(TMT10)	0	1.11384	1		1.08213	1		0.948774	1		0.989143	1		0.958562	1		0.879122	1		1.03095	1		0.976593	1		1.16375	1		0	2.287e-14	88.58	4.6387e-08	3	2579.41	1.95057	59.1147	0
High	aDFAQAcQDAGVR	1	2	1	P52873	N-Term(TMT10); C7(Carbamidomethyl)	0	1.08589	1		0.988855	1		0.983481	1		1.06468	1		0.975619	1		1.01484	1		0.907515	1		0.92535	1		1.10411	1		0	1.623e-09	88.51	8.80805e-09	2	1637.79	1.82273	60.0124	0
High	vQNATLAVANITNADSATR	2	1	1	Q5XI04	N-Term(TMT10)	0	1.03943	2	1.36537	1.15865	2	18.3573	0.942397	2	3.03776	0.979947	2	0.816749	0.975939	2	0.354886	0.971516	2	10.4163	0.947485	2	1.63704	0.991423	2	2.58051	1.09112	2	3.37641	0	1.92e-12	88.49	3.51117e-08	2	2159.17	3.52816	78.1931	0
High	gTITIQDTGIGMTk	3	1	1	Q5XHZ0	N-Term(TMT10); K14(TMT10)	0	0.897656	3	2.95951	0.907143	3	0.904514	1.02963	3	1.51297	1.04153	3	1.0317	1.00036	3	0.42546	1.05815	3	1.76466	1.05592	3	3.34921	1.04411	3	1.01613	0.88599	3	2.57689	0	2.858e-11	88.48	4.49841e-08	2	1894.08	3.49277	78.585	0
High	eMDQTMAANAQk	2	3	1	Q4KM73	N-Term(TMT10); K12(TMT10)	0	1.11383	2	5.97854	0.943609	2	18.422	1.04225	2	10.5723	1.00699	2	11.0117	0.950297	2	5.00925	1.01382	2	1.52659	0.946966	2	2.1196	0.960393	2	5.6739	1.04224	2	4.9681	0	2.931e-10	88.47	1.9557e-08	2	1795.91	0.893368	56.4811	0
High	sTAVVEQGGIQTVDQLIk	1	2	1	A0A140TAA4	N-Term(TMT10); K18(TMT10)	0	0.877356	1		0.866621	1		1.03316	1		1.01557	1		1.09967	1		0.985565	1		1.11522	1		1.08502	1		0.879034	1		0	1.815e-13	88.47	4.38077e-08	2	2344.35	1.57884	87.9682	0
High	aVTEQGAELSNEER	2	1	1	P68255	N-Term(TMT10)	0	1.13977	2	4.60794	0.967231	2	15.3395	0.891241	2	4.09819	0.965662	2	2.71319	0.940873	2	1.86287	0.949384	2	8.67615	0.89452	2	5.04752	1.24915	2	19.2397	1.10104	2	2.30228	0	7.314e-12	88.41	1.58633e-08	2	1761.88	1.27445	53.7081	0
High	vEGDVALPSVQGDLk	6	1	1	F1LUD3	N-Term(TMT10); K15(TMT10)	0	1.00796	6	4.21142	0.992202	6	1.58928	0.980809	6	2.24169	1.03092	6	3.48606	0.966886	6	1.96986	1.05097	6	2.73798	0.982762	6	3.38467	0.97843	6	6.95331	1.01805	6	3.54968	0	1.607e-10	88.41	4.44893e-08	2	1985.14	1.53242	82.1752	0
High	hVIPMNPNTDDLFk	3	2	1	F1LPK7	N-Term(TMT10); K14(TMT10)	0	0.94109	3	5.23252	0.900225	3	8.16455	1.0475	3	4.52611	0.958701	3	4.51666	1.06532	3	2.46309	1.01768	3	0.390845	1.05247	3	2.07063	1.10864	3	1.52521	0.887301	3	3.69891	0	1.622e-08	88.41	4.47056e-08	2	2099.14	0.227193	77.4524	0
High	aEGSDVANAVLDGADcIMLSGETAk	2	4	2	P11980;Q6P7S0	N-Term(TMT10); C16(Carbamidomethyl); K25(TMT10)	0																												0	2.47e-14	88.41	2.5237e-08	3	2952.47	-0.176114	87.3231	0
High	qATLGAGLPIATPcTTVNk	2	1	1	P17764	N-Term(TMT10); C14(Carbamidomethyl); K19(TMT10)	0	0.984794	2	3.04466	0.949173	2	6.22004	1.02947	2	0.396261	0.979473	2	0.308672	1.03997	2	0.246242	0.975939	2	0.0969507	1.03218	2	1.25374	1.05296	2	6.29097	0.973386	2	2.64974	0	2.498e-13	88.4	4.20623e-08	2	2371.35	1.46638	80.0749	0
High	qPAENVNQYLTDSk	3	1	1	Q5U300	N-Term(TMT10); K14(TMT10)	0	1.03245	3	0.944412	1.06059	3	3.2153	0.940823	3	3.51966	0.983184	3	0.233424	0.982535	3	1.10295	1.04534	3	0.254903	0.936902	3	2.67628	0.981425	3	0.746347	1.10662	3	1.68712	0	1.438e-11	88.37	3.87152e-08	2	2065.1	1.09886	71.2403	0
High	eHINLGcDVDFDIAGPSIR	4	1	1	Q9Z2L0	N-Term(TMT10); C7(Carbamidomethyl)	0	0.980653	4	5.94647	0.961104	4	6.3667	1.07045	4	12.9025	0.987066	4	3.7645	1.05237	4	3.38028	1.00494	4	5.78189	1.04869	4	7.75944	1.0029	4	3.09123	0.913833	4	6.72842	0	3.363e-10	88.37	2.29963e-08	3	2357.18	1.63047	84.2769	0
High	kGEGYSNPNEGATVEVHLEGccAGR	3	1	1	Q5U2T9	K1(TMT10); N-Term(TMT10); C21(Carbamidomethyl); C22(Carbamidomethyl)	0	1.03941	3	0.320694	1.00338	3	0.48391	0.849294	3	6.63757	1.06397	3	13.1857	0.979192	3	0.957758	1.04963	3	4.43176	0.998956	3	2.84661	0.962192	3	0.403641	1.12742	3	1.54618	0	3.585e-18	88.37	1.21531e-08	3	3149.52	0.170355	61.4991	1
High	vPTPNVSVVDLTcR	8	8	2	P04797;M0R660	N-Term(TMT10); C13(Carbamidomethyl)	0																												0	2.033e-06	88.32	4.18137e-08	2	1785.98	1.61953	81.0742	0
High	nMSVIAHVDHGk	10	1	1	P05197	N-Term(TMT10); K12(TMT10)	0	1.0408	10	4.39088	1.03908	10	16.6434	0.963128	10	10.7524	1.05737	10	7.5229	0.879095	10	7.0126	1.07187	10	9.25771	0.89338	10	11.0836	0.916468	10	11.7459	1.17209	10	17.6481	0	3.333e-10	88.3	4.32639e-08	2	1765.98	1.61014	59.1359	0
High	aWGPGLETGQVGk	1	2	1	A0A0H2UHR7	N-Term(TMT10); K13(TMT10)	0	1.07943	1		1.12935	1		0.96368	1		0.996562	1		0.953851	1		0.936803	1		0.949722	1		0.898077	1		1.22712	1		0	4.825e-10	88.28	3.93773e-08	2	1758	1.76408	72.9001	0
High	qIWTLEQPPDEAGSAAVcLR	4	2	2	P85845;A0A0G2KAM4	N-Term(TMT10); C18(Carbamidomethyl)	0																												0	1.892e-11	88.27	3.22447e-08	2	2470.27	2.24314	86.5225	0
High	aASQQDAVTEGAMPAATGk	2	1	1	O35821	N-Term(TMT10); K19(TMT10)	0	0.874496	2	4.39362	0.838744	2	2.64328	1.00597	2	2.94493	1.07924	2	1.43757	1.02057	2	1.12444	1.11615	2	4.73885	1.02867	2	3.00439	1.07332	2	1.47017	0.869281	2	5.39448	0	9.779e-12	88.26	3.94844e-08	3	2262.19	2.43869	59.4387	0
High	sEGAAEEQPEPAPAPEQEAAAPGPAAGGEAPk	1	2	2	A0A0G2K1L8;Q05175	N-Term(TMT10); K32(TMT10)	0																												0	4.096e-16	88.26	2.06752e-08	4	3469.71	0.143557	58.0164	0
High	eTLPAEQDLTTk	1	1	1	P18420	N-Term(TMT10); K12(TMT10)	0	0.98765	1		0.998912	1		0.986932	1		1.03901	1		0.972385	1		1.0304	1		1.0152	1		0.993904	1		0.990422	1		0	1.561e-09	88.25	4.94506e-08	2	1804.01	2.13664	67.4737	0
High	fSVGGMTDVAEIk	2	1	1	Q924S5	N-Term(TMT10); K13(TMT10)	0	0.58004	2	10.9247	0.604021	2	4.81489	1.19563	2	3.50934	1.18916	2	7.51278	1.12884	2	8.37421	1.16645	2	1.89027	1.14982	2	1.64991	1.12109	2	4.75009	0.522984	2	14.3849	0	1.748e-10	88.23	4.38917e-08	2	1812	1.69801	86.5192	0
High	vTAIYIDPATHLQk	4	1	1	P12785	N-Term(TMT10); K14(TMT10)	0	1.17584	4	3.20567	1.19324	4	2.2445	0.916152	4	3.20419	0.957548	4	4.17067	0.934003	4	1.52823	0.929738	4	4.99492	0.942407	4	1.58663	0.991211	4	4.99565	1.20161	4	3.97646	0	5.396e-11	88.22	4.52735e-08	2	2028.19	2.19898	76.4054	0
High	gVEEEEEDGEMRE	3	1	1	D4AAT4	N-Term(TMT10)	0	1.13077	3	7.6528	1.08112	3	7.34354	0.98024	3	4.13606	0.903799	3	3.71541	0.996873	3	6.05608	0.895618	3	2.99103	1.01783	3	3.02833	1.02564	3	14.2068	1.20787	3	2.01965	0	1.481e-09	88.2	1.50998e-09	2	1766.76	0.307746	51.8333	1
High	aPLQVAVLGPTGVAEPVEVR	3	2	1	A0A0H2UHR7	N-Term(TMT10)	0	1.00796	3	7.87698	0.960282	3	2.0861	1.0032	3	12.2883	0.956795	3	4.9167	0.973093	3	3.2155	0.95889	3	6.66336	1.02024	3	2.92611	1.03139	3	11.707	1.13517	3	14.2007	0	2.189e-10	88.18	3.8926e-08	2	2231.3	1.41653	86.0292	0
High	sSPADLVTVTDQk	1	3	1	F1M978	N-Term(TMT10); K13(TMT10)	0	1.02053	1		0.997521	1		1.00299	1		1.00625	1		1.03676	1		0.976237	1		0.986929	1		1.0095	1		1.00374	1		0	3.982e-10	88.12	5.31887e-08	2	1819.02	1.69671	70.6761	0
High	dGQAMLWDLNEGk	4	2	1	P63245	N-Term(TMT10); K13(TMT10)	0	0.91853	4	2.6917	0.941587	4	3.66883	1.03621	4	4.5303	1.02117	4	1.23623	1.03683	4	2.58413	1.05955	4	1.03961	1.00687	4	2.38434	1.04263	4	2.94342	0.922589	4	2.07458	0	7.005e-10	88.12	2.98319e-08	2	1935.01	1.31495	84.691	0
High	lEALELNEcIDHTPk	3	3	1	Q6AXR6	N-Term(TMT10); C9(Carbamidomethyl); K15(TMT10)	0	0.892742	3	5.90474	0.973199	3	3.4062	1.01918	3	0.0593403	1.0365	3	1.23257	1.02451	3	1.56946	1.03271	3	3.11204	1.01315	3	2.86037	1.07489	3	0.946811	0.96573	3	4.60287	0	2.405e-12	88.12	4.11634e-08	2	2240.2	1.30123	79.0837	0
High	yLEcSALQQDGVk	1	3	1	A0A096MK75	N-Term(TMT10); C4(Carbamidomethyl); K13(TMT10)	0	1.1306	1		1.10869	1		0.98967	1		1.02858	1		0.930612	1		1.0576	1		0.849349	1		0.868964	1		1.11254	1		0	6.304e-11	88.11	3.76269e-08	2	1969.05	1.12458	72.3116	0
High	qLEVEPEGLEPEAENk	4	1	1	Q924S5	N-Term(TMT10); K16(TMT10)	0	0.656233	4	11.7813	0.645562	4	14.0158	1.09868	4	3.03123	1.1412	4	4.80828	1.12534	4	1.20179	1.15002	4	3.17877	1.13039	4	1.15426	1.12573	4	3.42914	0.663575	4	10.1362	0	8.556e-11	88.09	3.84216e-08	2	2269.2	1.8755	74.2363	0
High	aNDTTFGLAAGVFTR	2	2	1	Q9JLJ3	N-Term(TMT10)	0	1.01342	2	2.76745	1.033	2	0.618688	0.982357	2	2.44119	1.02459	2	4.35538	0.960218	2	5.53109	1.05123	2	1.51225	0.975852	2	3.50617	0.965933	2	1.41319	1.02131	2	2.55104	0	4.384e-11	88.08	3.87435e-08	2	1769.94	2.04577	86.2243	0
High	iDQLMIEmDGTENk	3	3	1	M0R5J4	N-Term(TMT10); M8(Oxidation); K14(TMT10)	0	0.869442	3	0.678645	0.871403	3	4.20907	0.991906	3	4.11435	0.972655	3	1.78394	1.0923	3	4.00677	1.00771	3	8.69674	1.12325	3	2.02818	1.07065	3	0.982466	0.883154	3	1.46018	0	1.186e-09	88.06	3.26698e-08	2	2111.08	1.9202	81.7054	0
High	sSEVVLSGDDEDYQR	5	2	1	A0A0G2JUA5	N-Term(TMT10)	0	1.11265	5	2.20294	1.05982	5	14.0203	0.942251	5	5.14486	0.945656	5	2.84981	0.984686	5	1.04613	0.921054	5	9.10757	1.01329	5	5.27152	1.04292	5	8.02366	1.04589	5	6.32573	0	2.768e-12	88.05	7.28539e-09	2	1927.91	2.88014	61.2675	0
High	aEAEAQAEELSFPR	1	2	1	P52873	N-Term(TMT10)	0	0.940639	1		0.975312	1		1.02919	1		1.0273	1		1.00836	1		0.97767	1		1.00344	1		1.04078	1		1.00646	1		0	2.118e-11	88.04	2.77954e-08	2	1776.9	1.17392	71.5046	0
High	aVASQLDcNFLk	2	2	1	Q32PW9	N-Term(TMT10); C8(Carbamidomethyl); K12(TMT10)	0	1.04888	2	10.8279	1.06523	2	2.51061	1.02881	2	2.90464	1.0707	2	6.94769	0.856493	2	12.9365	1.04608	2	2.1669	0.891209	2	12.5882	0.900755	2	10.331	1.11482	2	4.75287	0	1.549e-09	88.04	5.20575e-08	2	1824.01	3.2351	82.2397	0
High	tELGLDLGLEPk	3	1	1	Q9Z1W6	N-Term(TMT10); K12(TMT10)	0	0.826691	3	4.96874	0.792458	3	4.90015	1.05712	3	0.938472	1.02875	3	0.565449	1.1139	3	0.600981	1.03796	3	0.943772	1.16024	3	3.83944	1.05651	3	3.57238	0.748071	3	0.620739	0	2.187e-09	87.98	4.22731e-08	2	1743.03	1.79092	86.7487	0
High	aQVAQPGGDTIFGk	2	2	1	P62959	N-Term(TMT10); K14(TMT10)	0	1.0644	2	2.79632	1.02833	2	6.091	1.01155	2	2.45997	1.05534	2	3.73692	0.970177	2	1.40014	1.00332	2	1.41761	0.915174	2	2.55618	0.94319	2	4.66946	1.04731	2	2.24563	0	2.028e-10	87.97	4.78764e-08	2	1847.05	1.44147	71.3806	0
High	eAIESAIGGNAYQHSk	1	1	1	Q9Z336	N-Term(TMT10); K16(TMT10)	0	0.884587	1		0.974909	1		0.960895	1		1.02784	1		0.99578	1		1.11159	1		0.919608	1		1.00334	1		1.122	1		0	2.014e-12	87.96	4.22283e-08	3	2133.14	0.549782	62.4562	0
High	vAPEEHPVLLTEAPLNPk	28	6	1	P60711	N-Term(TMT10); K18(TMT10)	0	1.04113	28	7.17773	1.09129	28	6.98715	0.95755	28	5.5921	0.991379	28	4.72025	0.958331	28	7.33599	1.01392	28	5.92926	0.969582	28	4.72413	0.943822	28	7.53654	1.1074	28	6.8863	0	1.111e-10	87.95	4.5933e-08	2	2412.39	0.430992	76.2053	0
High	gLAITFVSDENDAk	3	1	1	Q63413	N-Term(TMT10); K14(TMT10)	0	1.00851	3	10.2351	1.05305	3	10.1976	0.92851	3	2.36332	0.99981	3	3.97494	1.0209	3	1.63139	0.991149	3	1.05971	0.967363	3	4.8338	1.02473	3	1.34059	1.11769	3	5.28007	0	4.257e-11	87.94	5.60822e-08	2	1938.06	1.58186	84.2041	0
High	mEPLNNLQVAVk	3	5	2	P62944;A0A0G2K2V2	N-Term(TMT10); K12(TMT10)	0																												0	9.506e-10	87.91	4.45781e-08	2	1814.06	-0.203277	81.7721	0
High	iEDGNDFGVAIQEk	2	1	1	Q63798	N-Term(TMT10); K14(TMT10)	0	0.990287	2	4.97174	1.01494	2	1.39161	1.0527	2	2.74072	1.09644	2	1.32374	0.917459	2	3.55259	1.12681	2	0.673202	0.891011	2	2.2269	0.89054	2	7.83281	0.977868	2	5.28552	0	2.811e-11	87.9	4.37078e-08	2	1993.07	2.41542	81.1034	0
High	vDIQTEDLEDGTck	3	2	1	D4A8D5	N-Term(TMT10); C13(Carbamidomethyl); K14(TMT10)	0	0.925485	3	3.26814	0.942376	3	3.02975	1.04118	3	6.15593	1.10386	3	4.79827	0.93861	3	1.43253	1.10324	3	0.358062	1.02354	3	12.7615	0.941929	3	4.95113	0.949278	3	1.87853	0	1.729e-11	87.86	2.65164e-08	2	2081.05	0.733488	70.6679	0
High	eLPDWAEDEPVAk	12	1	1	P11883	N-Term(TMT10); K13(TMT10)	0	1.09641	12	4.47329	1.14613	12	9.53061	0.969506	12	3.7534	0.991587	12	3.91871	0.887275	12	4.3353	1.02691	12	4.05913	0.868269	12	5.76617	0.90527	12	7.85553	1.20234	12	9.08975	0	2.644e-09	87.84	3.46962e-08	2	1957.04	1.77957	82.9391	0
High	qSLEASLAETEGR	3	2	1	Q6IFW6	N-Term(TMT10)	0	0.976393	3	2.86893	0.927254	3	8.19499	0.820342	3	24.2965	0.718002	3	26.3671	1.33032	3	12.7663	0.706027	3	19.4912	1.37515	3	8.64679	1.38957	3	5.16177	0.905331	3	3.64801	0	2.298e-10	87.82	3.08091e-08	2	1619.85	1.54198	68.4407	0
High	aITGASLADImAk	2	2	1	A0A0H2UH99	N-Term(TMT10); M11(Oxidation); K13(TMT10)	0	0.994825	2	6.45981	0.912733	2	2.06016	0.93444	2	0.074249	0.971201	2	1.93172	1.07158	2	2.31866	0.997779	2	0.367915	1.06032	2	4.88955	1.10625	2	0.323695	0.986274	2	7.7248	0	7.935e-09	87.81	5.22395e-08	2	1736.01	5.03106	78.4626	0
High	sLQSDLEAEQVk	1	3	1	G3V7L1	N-Term(TMT10); K12(TMT10)	0	0.987227	1		1.00524	1		1.02071	1		0.993569	1		0.978589	1		1.00801	1		0.964461	1		1.05546	1		1.01289	1		0	7.045e-10	87.8	5.6094e-08	2	1805.01	1.25034	70.777	0
High	iNVYYNEAAGNk	4	1	1	P85108	N-Term(TMT10); K12(TMT10)	0	1.18334	4	3.53189	1.1537	4	5.799	0.880122	4	0.900729	0.978423	4	1.86054	0.926645	4	2.96488	0.976061	4	5.02417	0.902062	4	3.48242	0.942573	4	6.0534	1.22249	4	4.1309	0	3.403e-09	87.79	4.15021e-08	2	1813.99	3.09859	70.2	0
High	lTFScLGGSDNFk	4	1	1	P83868	N-Term(TMT10); C5(Carbamidomethyl); K13(TMT10)	0	1.14785	4	1.43079	1.10331	4	1.60163	1.0666	4	1.41749	1.07851	4	2.95143	0.854432	4	2.1894	1.04985	4	6.44681	0.803717	4	1.5291	0.795552	4	2.59216	1.13813	4	5.81329	0	4.63e-09	87.79	3.82585e-08	3	1904	1.66965	84.8083	0
High	aDMGGAATIcSAIVSAAk	1	1	1	Q68FS4	N-Term(TMT10); C10(Carbamidomethyl); K18(TMT10)	0	1.16737	1		1.21656	1		1.06201	1		1.09495	1		0.752109	1		1.10035	1		0.706248	1		0.768207	1		1.20388	1		0	2.344e-14	87.79	4.88212e-08	2	2152.15	1.22139	86.9935	0
High	iNNVPAEGENEVNNELANR	2	1	1	B2GUZ9	N-Term(TMT10)	0	0.8696	2	12.5909	0.929056	2	4.66555	1.07267	2	4.94388	0.979407	2	3.87952	1.05065	2	0.021541	0.984536	2	0.61517	1.11342	2	2.79516	1.06902	2	7.94922	0.891556	2	7.03186	0	1.451e-13	87.78	2.5759e-08	2	2325.16	0.439083	72.5294	0
High	mEGPGVDIDSPDVNIEGPEGk	3	2	1	A0A0G2JUA5	N-Term(TMT10); M1(Oxidation); K21(TMT10)	0	1.06901	3	2.537	1.04259	3	6.32204	0.915663	3	0.280523	0.90432	3	1.61081	1.02118	3	4.91531	0.925999	3	4.29496	1.09835	3	3.46548	1.08581	3	2.11274	1.02958	3	0.35812	0	1.657e-10	87.78	2.93436e-08	2	2629.31	2.6235	77.5236	0
High	qSIAIDDcTFHQcVR	2	2	1	A0A140TAH5	N-Term(TMT10); C8(Carbamidomethyl); C13(Carbamidomethyl)	0	1.11668	2	4.27134	1.22926	2	3.15564	0.939995	2	1.26875	0.958988	2	2.7347	0.918309	2	5.1656	0.97199	2	11.784	0.959669	2	6.8314	0.922915	2	2.04037	1.12238	2	4.39897	0	6.133e-11	87.77	1.12799e-08	3	2079	1.87262	61.403	0
High	sAGQGEVLVYVEDPAGHQEEAk	5	1	1	C0JPT7	N-Term(TMT10); K22(TMT10)	0	0.932777	5	3.17534	0.903729	5	5.20258	1.04394	5	6.24589	1.06264	5	1.59547	0.984708	5	4.96667	1.06246	5	6.09765	0.97712	5	2.98989	1.02954	5	0.739205	0.982182	5	3.36855	0	2.253e-13	87.75	3.87804e-08	2	2771.43	2.47569	72.1094	0
High	aLDTMNFDVIk	2	7	3	D4A233;G3V9N0;Q9EPH8	N-Term(TMT10); K11(TMT10)	0																												0	1.59e-08	87.74	4.11414e-08	2	1724.97	0.118658	87.2911	0
High	kEDLISAFGTDDQTEIck	3	1	1	Q5RK30	N-Term(TMT10); K1(TMT10); C17(Carbamidomethyl); K18(TMT10)	0	1.04101	3	7.57636	1.06457	3	4.2999	1.00814	3	1.80481	1.01947	3	3.70054	0.921367	3	1.73547	1.05743	3	1.94388	0.954094	3	6.56371	0.949984	3	2.28908	1.05183	3	0.167128	0	3.69e-14	87.7	4.63621e-08	3	2757.46	0.995297	81.8863	1
High	aGGIETIANEFSDR	2	1	1	Q66HA8	N-Term(TMT10)	0	1.06192	2	3.02231	1.06409	2	0.505329	0.975109	2	2.38672	1.00678	2	1.37458	0.942619	2	2.80678	1.03869	2	4.96659	0.927591	2	0.981921	0.984188	2	1.60236	1.05688	2	2.67294	0	7.211e-11	87.68	3.10507e-08	2	1708.87	2.56318	85.1121	0
High	gDVPSVGLEGPDVDLQGPEGk	3	2	1	A0A0G2JUA5	N-Term(TMT10); K21(TMT10)	0	1.17944	3	1.30273	1.17476	3	3.95228	0.917029	3	1.78697	0.924504	3	1.60951	0.900807	3	0.522301	0.976377	3	0.728675	0.943883	3	4.28886	0.868466	3	1.69937	1.33355	3	3.7581	0	1.698e-10	87.68	4.94764e-08	3	2523.34	1.42292	82.1905	0
High	vDIDVPNVDAQGPELHMk	6	2	1	A0A0G2JUA5	N-Term(TMT10); K18(TMT10)	0	1.16202	6	5.39428	1.19067	6	2.07701	0.930467	6	2.82373	0.955027	6	3.80129	0.930084	6	8.57259	0.942296	6	2.3898	0.911489	6	5.61158	0.917418	6	6.775	1.18764	6	3.12716	0	8.854e-12	87.67	5.13005e-08	3	2435.31	2.75523	80.8161	0
High	fTQAGSEVSALLGR	2	3	1	G3V6D3	N-Term(TMT10)	0	0.424083	2	168.286	0.38141	2	158.118	0.650055	2	83.9513	0.513757	2	121.081	2.05166	2	90.4703	1.61038	2	104.299	0.885357	2	48.8701	0.56421	2	140.289	0.332216	2	156.424	0	1.817e-10	87.64	4.606e-08	2	1664.92	1.50631	87.6169	0
High	eGVTVYATGTHAQVEDGk	2	2	1	D3ZXI0	N-Term(TMT10); K18(TMT10)	0	0.711702	2	0.681268	0.7675	2	1.98013	1.03549	2	2.68617	1.28985	2	3.57566	0.840072	2	6.55261	1.34336	2	1.54853	0.956487	2	6.64648	0.915317	2	7.83565	0.890307	2	2.47352	0	1.089e-12	87.63	4.78057e-08	3	2320.22	0.453985	61.0688	0
High	lYTVNAEEcAVGQER	1	2	1	A0A0G2K277	N-Term(TMT10); C9(Carbamidomethyl)	0	0.958037	1		0.987873	1		1.01652	1		1.00965	1		1.04461	1		1.0283	1		1.08098	1		1.05224	1		0.796309	1		0	2.082e-12	87.6	2.02454e-08	2	1967.97	1.76359	66.5661	0
High	qNSVADEVGLLPQk	2	1	1	D3ZTT7	N-Term(TMT10); K14(TMT10)	0	1.05543	2	2.44737	1.02426	2	2.63675	0.993616	2	2.75772	0.943811	2	3.82784	1.01353	2	2.36926	0.990536	2	2.85908	1.04346	2	0.516058	0.986772	2	0.586603	1.01398	2	4.17489	0	1.987e-10	87.58	5.10653e-08	2	1956.12	3.21406	78.2874	0
High	gNDISSGTVLSEYVGSGPPk	5	1	1	P31044	N-Term(TMT10); K20(TMT10)	0	0.946532	5	5.69785	0.938396	5	4.0088	0.952567	5	4.03788	0.996635	5	3.7286	0.970911	5	3.27878	1.09014	5	2.54313	0.97917	5	0.675507	0.967845	5	3.46682	1.10666	5	5.22813	0	4.754e-15	87.58	5.05416e-08	2	2422.29	1.30753	82.1442	0
High	gSAFAIGSDGLccQSR	1	1	1	Q641Y8	N-Term(TMT10); C12(Carbamidomethyl); C13(Carbamidomethyl)	0	1.04231	1		1.08715	1		1.00976	1		0.964739	1		0.970075	1		1.01483	1		0.980235	1		0.9008	1		1.10541	1		0	9.495e-13	87.55	1.16902e-08	2	1914.91	4.29233	69.0707	0
High	sTGNFLTLSQAVDk	2	1	1	Q5PPJ6	N-Term(TMT10); K14(TMT10)	0	0.820895	2	0.75182	0.78986	2	0.307596	1.11672	2	1.21265	1.02081	2	3.01923	1.1585	2	1.88062	1.01478	2	4.84878	1.14886	2	8.17439	1.06236	2	3.15301	0.743577	2	9.28536	0	3.81e-11	87.55	5.64293e-08	2	1939.09	0.69773	83.593	0
High	gSTDNLMDDIER	3	1	1	D4ACB8	N-Term(TMT10)	0	0.987524	3	3.59493	0.97174	3	0.0412346	0.997019	3	1.83427	1.04064	3	2.70234	1.01045	3	0.725656	1.0502	3	4.25012	0.983222	3	2.56399	1.01947	3	1.83466	0.997447	3	4.38548	0	8.366e-09	87.53	9.4483e-09	2	1594.76	1.69084	72.0585	0
High	iAYQLAVEAESEQk	6	3	2	Q5M7X1;O35142	N-Term(TMT10); K14(TMT10)	0																												0	2.468e-11	87.47	6.09701e-08	2	2037.13	1.42506	85.3723	0
High	tGQEVVFVAEPDNk	3	2	1	A0A0G2K757	N-Term(TMT10); K14(TMT10)	0	0.963039	3	1.94014	0.939253	3	1.08655	1.0528	3	1.03747	0.978108	3	0.416186	1.03712	3	1.79415	0.969625	3	1.82003	1.07097	3	0.884677	1.03608	3	4.6757	0.936648	3	2.12923	0	3.859e-11	87.39	6.33804e-08	2	1991.09	0.834831	69.838	0
High	yQLDPTASISAk	3	1	1	P81155	N-Term(TMT10); K12(TMT10)	0	0.949898	3	0.888567	0.978237	3	7.56799	0.96131	3	4.83098	1.03589	3	4.57322	0.997723	3	1.40886	1.0281	3	0.542342	0.996883	3	2.89745	1.05802	3	4.3818	0.950336	3	0.330563	0	9.166e-09	87.38	6.2521e-08	2	1752	2.09999	72.7463	0
High	rDDNSGQMLLPLSDAR	1	12	1	Q6S3A0	N-Term(TMT10)	0	1.05933	1		1.03774	1		1.00623	1		0.971595	1		1.05845	1		0.921924	1		1.00427	1		0.96406	1		1.06271	1		0	5.602e-11	87.38	3.46425e-08	2	2017.04	2.59816	67.4473	1
High	tALINATGEEVAMR	5	7	1	G3V8L3	N-Term(TMT10)	0	0.991494	5	2.85886	0.955683	5	5.17566	1.00261	5	3.24934	0.9374	5	3.66895	1.13615	5	3.25351	0.895919	5	16.8535	1.09056	5	22.599	1.1548	5	0.969036	0.921588	5	9.88626	0	1.113e-10	87.35	3.37782e-08	2	1704.92	1.8237	72.7873	0
High	vQLLADPTGAFGk	1	2	1	A0A0G2JSS8	N-Term(TMT10); K13(TMT10)	0	0.76416	1		0.767665	1		1.14508	1		1.16099	1		1.07625	1		1.11211	1		1.01468	1		1.02	1		0.738947	1		0	1.446e-09	87.34	5.35054e-08	2	1775.05	2.88002	87.0894	0
High	mTNGFSGADLTEIcQR	2	1	1	P46462	N-Term(TMT10); C14(Carbamidomethyl)	0	0.92897	2	0.129381	0.972286	2	2.96237	0.985578	2	2.20903	0.988409	2	2.6047	1.07643	2	2.96649	1.0237	2	2.0758	1.0719	2	1.23708	1.06808	2	2.08623	0.877357	2	1.95079	0	4.139e-13	87.34	1.26384e-08	2	2028.98	3.82478	80.8272	0
High	vAEDDEDDDVETk	3	1	1	P06302	N-Term(TMT10); K13(TMT10)	0	1.1913	3	13.2397	1.17813	3	2.36298	1.0855	3	0.75044	1.01215	3	1.16174	0.806889	3	0.0899884	1.03169	3	0.13477	0.827482	3	1.25584	0.811909	3	1.36361	1.11587	3	7.15641	0	8.328e-11	87.32	1.30674e-08	2	1937.92	-0.108508	55.2197	0
High	gILFVGSGVSGGEEGAR	5	3	1	P85968	N-Term(TMT10)	0	0.982054	5	5.89401	0.908873	5	12.5886	1.05546	5	4.50343	0.986945	5	4.94347	1.00277	5	8.76524	1.06039	5	10.0814	1.0134	5	9.9808	1.01988	5	6.6987	0.963992	5	4.6281	0	8.362e-13	87.28	4.69541e-08	2	1820.97	1.34801	79.3273	0
High	gPNVDMSGPDVEIEGPEGk	5	2	1	A0A0G2JUA5	N-Term(TMT10); K19(TMT10)	0	1.16639	5	3.73496	1.23346	5	1.89534	0.925371	5	2.13991	0.963975	5	2.07405	0.923164	5	1.04445	0.943268	5	5.84976	0.914131	5	4.93784	0.91505	5	8.67969	1.2888	5	8.0225	0	6.655e-11	87.24	2.95471e-08	2	2385.2	0.630922	74.7261	0
High	dYTSGAMLTGELk	2	2	1	F8WFH8	N-Term(TMT10); K13(TMT10)	0	0.782267	2	30.6884	0.726949	2	20.9523	1.04965	2	1.48851	1.21066	2	1.06792	1.01067	2	9.77836	1.18086	2	10.9146	0.994502	2	9.65626	1.01554	2	13.7765	0.7854	2	28.5303	0	2.231e-10	87.15	4.867e-08	2	1843.99	0.773308	78.6121	0
High	vGLLATLQDTQk	1	3	1	Q712J3	N-Term(TMT10); K12(TMT10)	0	1.09625	1		1.12392	1		0.987215	1		0.904406	1		0.982321	1		0.983557	1		1.06264	1		0.942937	1		1.02297	1		0	1.416e-09	87.07	4.30958e-08	2	1745.06	1.64061	86.7162	0
High	aVLVDLEPGTMDSVR	3	3	1	Q6P9T8	N-Term(TMT10)	0	1.16055	3	11.6853	1.22475	3	4.17397	0.934725	3	4.59558	0.963937	3	0.612862	0.854412	3	6.05274	1.00232	3	5.63352	0.889503	3	18.4026	0.834339	3	2.75127	1.31605	3	0.491266	0	2.976e-08	86.99	5.94959e-08	2	1830.99	1.37857	85.7915	0
High	iANLQTDLSDGLR	4	1	1	C0JPT7	N-Term(TMT10)	0	0.93233	4	1.11126	0.834315	4	7.76281	1.04252	4	7.4961	1.00098	4	6.40716	1.11741	4	6.87678	0.976164	4	6.79657	1.10799	4	1.71177	1.07377	4	1.6043	0.800058	4	6.18302	0	1.504e-09	86.98	5.95328e-08	2	1644.92	2.54112	83.7022	0
High	vADQDGDSMATR	1	2	1	I6L9G5	N-Term(TMT10)	0	1.7066	1		1.85467	1		0.785525	1		0.706565	1		0.727304	1		0.763686	1		0.726714	1		0.724217	1		1.60535	1		0	6.772e-10	86.97	7.13228e-09	2	1494.71	1.60039	44.6281	0
High	dLGLAQDSATSTk	2	1	1	P29266	N-Term(TMT10); K13(TMT10)	0	1.05714	2	4.67596	1.08061	2	7.64107	0.978541	2	1.3196	0.979735	2	3.2261	0.964706	2	3.99066	0.985022	2	1.51936	0.969939	2	1.53663	0.98695	2	7.21366	1.07781	2	1.55898	0	1.477e-10	86.95	6.40831e-08	2	1764.98	1.23786	61.6494	0
High	aVcmLSNTTAIAEAWAR	4	7	3	P68370;Q5XIF6;A0A0H2UHM7	N-Term(TMT10); C3(Carbamidomethyl); M4(Oxidation)	0																												0	1.213e-11	86.95	3.69361e-08	2	2110.07	1.82336	85.9217	0
High	mDENQFVAVTSTNAAk	4	3	2	P47942;Q62952	N-Term(TMT10); K16(TMT10)	0																												0	1.699e-12	86.89	4.43055e-08	2	2184.14	1.37767	74.3802	0
High	nLSFNITEDELk	3	3	1	P13383	N-Term(TMT10); K12(TMT10)	0	0.860479	3	7.27394	0.840941	3	11.1026	1.09042	3	8.5719	0.987581	3	1.73011	1.14714	3	8.608	0.951124	3	7.0767	1.17671	3	4.81075	1.13933	3	0.348767	0.739896	3	0.991334	0	1.606e-09	86.87	5.96208e-08	2	1881.04	0.913638	85.5806	0
High	lLEAQAcTGGIIDPSTGER	5	12	1	Q6S3A0	N-Term(TMT10); C7(Carbamidomethyl)	0	0.961482	5	14.3009	1.04008	5	4.60002	0.984051	5	2.21163	1.00797	5	2.71222	1.0071	5	9.81328	0.980228	5	7.22121	1.01782	5	3.43736	0.980642	5	5.91672	1.06923	5	5.30479	0	3.581e-13	86.84	4.03678e-08	2	2217.14	0.268957	79.7969	0
High	mQVDQEEPHTEEQQPQTPAENk	3	2	1	O88600	N-Term(TMT10); K22(TMT10)	0	0.911843	3	0.478561	0.864734	3	4.19897	1.03178	3	1.93751	1.0001	3	3.70058	1.04685	3	2.06161	1.07245	3	3.29081	1.02819	3	10.8336	1.07629	3	1.81822	0.849086	3	0.536423	0	1.017e-14	86.82	2.58922e-08	3	3051.48	1.99406	54.8686	0
High	aEQLASVQYTLPk	2	2	1	A0A0G2K2P5	N-Term(TMT10); K13(TMT10)	0	1.04661	2	5.5965	1.07606	2	11.8565	0.922976	2	0.617198	1.02127	2	0.284576	0.955312	2	2.83575	1.00558	2	3.13333	0.932213	2	5.93689	0.945292	2	4.18598	1.18928	2	1.25556	0	8.715e-11	86.73	6.90054e-08	2	1906.11	2.87808	78.2462	0
High	nNALNQVVLWDk	2	1	1	D3ZF12	N-Term(TMT10); K12(TMT10)	0	0.962063	2	0.731125	0.953169	2	0.946275	1.02843	2	1.70176	0.930167	2	0.274876	1.12654	2	4.64109	0.912079	2	0.516152	1.14215	2	0.719699	1.08762	2	4.50009	0.885892	2	3.90921	0	1.611e-09	86.71	6.82574e-08	2	1872.08	1.94181	85.1523	0
High	aASADSTTEGAPTDGFTVLSTk	4	2	1	A0A140TAB4	N-Term(TMT10); K22(TMT10)	0	1.0385	4	1.56016	1.0259	4	1.50113	0.970803	4	1.37702	1.03443	4	0.830342	0.948983	4	2.40016	1.05646	4	2.4581	0.941431	4	1.64768	0.946965	4	2.31957	1.08193	4	1.62969	0	1.378e-13	86.69	5.16437e-08	2	2585.34	2.07717	78.1916	0
High	qTIENSQGAYQEAFDISk	4	1	1	P68255	N-Term(TMT10); K18(TMT10)	0	1.05035	4	6.39897	1.072	4	4.49026	0.931047	4	1.81976	0.985992	4	1.65957	1.00904	4	1.80515	1.00703	4	4.54745	0.963562	4	4.55986	0.991558	4	3.62446	1.06543	4	2.09791	0	1.593e-09	86.65	4.89856e-08	3	2487.28	1.76812	79.7839	0
High	aANDFNPDADAk	2	2	1	Q6IMZ3	N-Term(TMT10); K12(TMT10)	0	1.16672	2	10.9966	1.23138	2	15.2758	0.919864	2	10.4117	0.906086	2	3.7606	0.882057	2	7.62801	0.953629	2	5.84456	0.898215	2	0.758172	0.914858	2	3.50135	1.32642	2	0.16925	0	1.759e-09	86.61	3.57968e-08	2	1706.88	0.782173	58.2993	0
High	gEGADVNVPLAk	4	2	1	A0A0G2JUA5	N-Term(TMT10); K12(TMT10)	0	1.13701	4	5.8332	1.2246	4	8.62171	0.955751	4	4.59509	0.971839	4	2.91571	0.902526	4	1.49753	0.956959	4	4.44474	0.946066	4	6.22501	0.927922	4	6.36045	1.13983	4	12.4846	0	3.922e-09	86.6	5.3272e-08	2	1627.94	1.67969	64.3872	0
High	tQEQLASEMAELTAR	2	3	1	A0A1W2Q6E9	N-Term(TMT10)	0	0.918473	2	1.887	0.812212	2	2.3814	1.09851	2	6.67419	0.9586	2	0.62392	1.16262	2	3.69233	0.935643	2	2.68036	1.17844	2	2.59901	1.12204	2	1.30916	0.752975	2	12.5352	0	7.255e-12	86.6	3.8614e-08	2	1906.98	2.39335	84.5025	0
High	cEDmSVNQDLADTDAR	2	1	1	P07150	N-Term(TMT10); C1(Carbamidomethyl); M4(Oxidation)	0	0.988142	2	4.46772	0.9422	2	1.6557	1.09912	2	2.75966	0.94318	2	9.13985	1.10413	2	5.27845	0.92058	2	8.27731	1.13481	2	7.95048	1.01464	2	11.4128	0.845413	2	6.68537	0	4.115e-11	86.58	2.19265e-09	2	2084.91	1.04684	55.7941	0
High	dDVALEGVGHFFR	4	4	1	P02793	N-Term(TMT10)	0	0.462548	4	17.9146	0.42643	4	3.08548	1.024	4	2.67789	1.05916	4	1.11295	1.39518	4	1.96769	1.04998	4	5.33733	1.45765	4	0.469045	1.39809	4	1.3545	0.406507	4	9.81897	0	2.525e-09	86.56	3.83089e-08	3	1690.88	0.891707	82.2798	0
High	lSQMAVQGLQQFk	1	2	1	D4A2Z6	N-Term(TMT10); K13(TMT10)	0	1.00241	1		1.03774	1		1.02374	1		1.0687	1		0.970856	1		1.08868	1		0.908866	1		0.907737	1		0.98325	1		0	1.127e-10	86.52	7.66582e-08	2	1936.11	0.610394	87.9527	0
High	aTEmVEVGPDDDEVGAER	3	2	1	G3V8L9	N-Term(TMT10); M4(Oxidation)	0	1.03103	3	1.44509	1.01714	3	3.50027	0.95721	3	4.23039	0.930074	3	6.00702	1.04114	3	2.98213	0.983505	3	0.411923	1.02802	3	2.77011	1.04361	3	1.44504	1.08587	3	0.946521	0	7.371e-10	86.45	7.81302e-09	2	2163.99	1.6046	60.393	0
High	eESPPLIGQQSTVSDVPR	1	3	1	F1LST1	N-Term(TMT10)	0	1.15742	1		1.19667	1		0.940055	1		0.934246	1		0.93098	1		0.928797	1		0.964263	1		0.984203	1		1.13034	1		0	1.199e-13	86.45	5.02751e-08	2	2168.14	-0.354998	67.1729	0
High	tIDGQQTIIAcIESHQFQPk	2	1	1	B2GUZ5	N-Term(TMT10); C11(Carbamidomethyl); K20(TMT10)	0	1.09352	2	0.286295	1.06243	2	7.53109	1.0697	2	5.98427	1.10566	2	1.81983	0.846889	2	4.9312	1.0396	2	4.45892	0.868051	2	3.12007	0.847624	2	1.92582	1.0858	2	1.04596	0	4.154e-13	86.45	6.46556e-08	3	2772.48	0.902512	85.7312	0
High	kHEAIETDIAAYEER	5	4	1	A0A0G2JZY6	N-Term(TMT10); K1(TMT10)	0	1.13534	5	3.5143	1.00094	5	6.60556	0.997528	5	3.25774	0.998948	5	3.28639	0.948649	5	2.86884	0.988365	5	2.86045	0.949542	5	0.993311	0.955173	5	6.69619	1.11839	5	7.50191	0	7.731e-13	86.43	6.52953e-08	2	2233.19	1.97487	64.4542	1
High	lGVQVVITDPEk	1	2	1	P28480	N-Term(TMT10); K12(TMT10)	0	0.940995	1		0.842737	1		1.05432	1		1.03051	1		1.06782	1		0.991362	1		1.07391	1		1.1259	1		0.816553	1		0	2.089e-08	86.41	4.31978e-08	2	1756.06	1.42221	80.826	0
High	dEEPDDNVNIEISR	1	1	1	D3ZQ77	N-Term(TMT10)	0	0.97383	1		1.03032	1		0.990579	1		1.04913	1		0.988967	1		1.0048	1		0.985066	1		1.02567	1		0.968427	1		0	3.454e-11	86.38	1.2773e-08	2	1873.9	1.23204	64.878	0
High	sQIcDNAALYAQk	3	1	1	D3ZPR0	N-Term(TMT10); C4(Carbamidomethyl); K13(TMT10)	0	1.14641	3	6.32012	1.20697	3	0.117471	0.972369	3	2.30801	1.00222	3	0.830488	0.835102	3	7.31738	1.01469	3	2.30212	0.870134	3	7.11798	0.884674	3	13.5925	1.20551	3	0.800877	0	1.061e-10	86.38	5.84566e-08	2	1940.03	1.29879	67.1271	0
High	tASSVIELTcAk	2	2	1	Q63002	N-Term(TMT10); C10(Carbamidomethyl); K12(TMT10)	0	1.31651	2	3.31334	1.32781	2	6.8589	0.884052	2	2.86334	0.853453	2	0.211635	0.933277	2	10.5614	0.84011	2	1.00552	0.951759	2	3.55598	0.926591	2	4.12995	1.25836	2	7.93415	0	2.757e-09	86.34	7.30501e-08	2	1737.99	1.65919	74.729	0
High	iMDPNIVGSEHYDVAR	2	3	1	G3V6D3	N-Term(TMT10)	0	1.03611	2	25.6138	1.03422	2	36.6449	0.816319	2	34.2765	1.02021	2	5.74976	0.838631	2	43.1731	1.12195	2	15.7124	0.820184	2	45.371	0.837174	2	33.1661	1.38529	2	46.4085	0	5.239e-11	86.31	3.48487e-08	2	2045.04	2.01626	71.1955	0
High	eIDQEAAVEVSQLR	4	1	1	P20788	N-Term(TMT10)	0	0.899932	4	3.39442	0.915556	4	1.48154	1.01484	4	3.65852	1.04653	4	3.54771	1.03368	4	4.60716	1.05322	4	4.10881	1.04373	4	4.0289	1.00412	4	8.03784	0.95545	4	2.75911	0	8.242e-11	86.28	5.68744e-08	2	1815.97	2.12909	76.8173	0
High	eGFVEYTEQVVk	2	3	1	D4A781	N-Term(TMT10); K12(TMT10)	0	0.886738	2	1.78686	0.896644	2	3.31798	1.06662	2	0.653835	1.14177	2	1.91495	0.960913	2	3.73208	1.12541	2	0.883615	0.935048	2	0.942854	0.970086	2	1.29108	0.911603	2	0.000774329	0	1.595e-09	86.28	6.06425e-08	2	1886.03	1.3434	83.8361	0
High	gLGEISAATEFk	2	5	1	F1LUV9	N-Term(TMT10); K12(TMT10)	0	1.13364	2	3.55364	1.11949	2	4.50301	0.94092	2	0.615252	0.983376	2	1.1305	0.969508	2	4.01274	0.952462	2	2.31386	0.954873	2	4.03176	0.931277	2	1.09784	1.14747	2	4.39994	0	1.891e-09	86.27	7.55353e-08	2	1680.96	2.68554	82.6794	0
High	aDHQPLTEASYVNLPTIALcNTDSPLR	3	1	1	P38983	N-Term(TMT10); C20(Carbamidomethyl)	0	1.21128	3	2.55108	0.988756	3	2.88759	0.883926	3	4.59484	0.989602	3	10.5933	0.927584	3	3.11168	1.02427	3	3.38738	0.820369	3	1.70509	1.02471	3	6.24508	1.14397	3	9.68326	0	7.705e-15	86.27	5.35829e-08	3	3225.65	1.46077	87.1274	0
High	aEAGVPAEFGIWTR	2	1	1	C0JPT7	N-Term(TMT10)	0	0.964857	2	3.39364	1.01461	2	4.54543	1.02335	2	1.13348	1.00967	2	4.09138	0.999205	2	2.0488	1.04012	2	1.19158	0.989206	2	6.25752	0.976169	2	3.74143	0.987829	2	0.533591	0	4.498e-11	86.26	5.46527e-08	2	1732.92	1.5332	87.0967	0
High	eNPGFDFSGAEISGNYTk	2	1	1	Q5M823	N-Term(TMT10); K18(TMT10)	0	0.87284	2	1.86556	0.960217	2	0.608182	0.957967	2	3.86342	1.05414	2	2.01332	1.00267	2	1.76128	1.10272	2	3.85397	0.978451	2	4.92029	1.04751	2	2.1546	0.992848	2	1.90777	0	5.112e-15	86.26	3.74998e-08	2	2391.19	0.962401	82.4302	0
High	eDEEESLNEVGYDDIGGcR	3	1	1	P46462	N-Term(TMT10); C18(Carbamidomethyl)	0	1.06145	3	1.70605	1.01455	3	4.84498	1.00477	3	3.00628	1.01935	3	0.299805	0.95768	3	4.31504	1.07863	3	2.05492	0.922918	3	5.80944	0.976356	3	6.20136	1.01624	3	10.7247	0	4.307e-14	86.25	4.1499e-09	2	2415.05	1.94334	72.8406	0
High	eVDEQMLNVQNk	7	5	3	P85108;P69897;Q6P9T8	N-Term(TMT10); K12(TMT10)	0																												0	3.278e-09	86.24	5.63311e-08	2	1905.02	1.82101	70.2723	0
High	aSLQELDLGSNk	2	3	1	E2RUH2	N-Term(TMT10); K12(TMT10)	0	0.997017	2	5.90105	1.08805	2	0.515925	0.959758	2	4.16995	1.05719	2	1.93172	0.982964	2	1.16117	1.05013	2	2.38721	0.887663	2	6.00513	0.975659	2	0.0825569	1.03635	2	1.46082	0	4.613e-09	86.23	8.14753e-08	2	1732.99	1.37957	75.9689	0
High	lcAATATILDkPEDR	6	1	1	P80254	N-Term(TMT10); C2(Carbamidomethyl); K11(TMT10)	0	0.974787	6	5.2442	0.987035	6	1.38115	1.05011	6	1.3232	1.08722	6	1.66952	0.954567	6	1.81488	1.03837	6	3.9898	0.959155	6	6.09925	0.96454	6	1.29728	0.949204	6	6.94356	0	8.897e-11	86.22	7.78426e-08	2	2132.18	2.79929	76.6865	0
High	aVHcEGAELSSPDEQEEDAEDR	1	1	1	D3ZD72	N-Term(TMT10); C4(Carbamidomethyl)	0	1.19834	1		1.08287	1		0.952319	1		0.870394	1		0.99864	1		0.818559	1		0.96513	1		1.06617	1		1.26487	1		0	4.493e-13	86.22	3.34294e-09	3	2702.17	1.70775	51.8989	0
High	dAVSNTTNQLESk	2	1	1	D4A4Z9	N-Term(TMT10); K13(TMT10)	0	0.908294	2	1.23547	0.976236	2	3.49462	1.05416	2	3.89749	1.03121	2	7.16035	1.05815	2	2.58398	1.00156	2	5.09942	1.01492	2	4.54542	1.02588	2	6.67426	0.896268	2	3.63951	0	1.469e-10	86.18	6.69954e-08	2	1865.01	2.12736	59.8901	0
High	iVLTNPVcTEVGEk	2	2	2	C9WPN6;P81795	N-Term(TMT10); C8(Carbamidomethyl); K14(TMT10)	0																												0	2.17e-11	86.17	7.56039e-08	2	2017.14	1.8002	80.8872	0
High	tIDDLEDEVYAQk	2	1	1	P58775	N-Term(TMT10); K13(TMT10)	0	1.43647	2	2.77975	1.42167	2	7.99312	0.791003	2	2.65699	0.82281	2	3.01263	0.860044	2	3.47976	0.840713	2	0.407811	0.904415	2	5.78337	0.877498	2	6.21038	1.44021	2	0.295792	0	3.68e-10	86.16	5.37468e-08	2	1997.05	0.812622	85.2366	0
High	sTGEAFVQFASk	3	1	1	D4ABK7	N-Term(TMT10); K12(TMT10)	0	1.05114	3	0.815717	1.01788	3	3.40663	0.967712	3	0.643452	1.01148	3	1.10132	1.0267	3	3.66645	0.962386	3	0.0551543	1.03114	3	1.00677	1.02488	3	0.335165	0.978815	3	0.882792	0	1.048e-09	86.15	6.06653e-08	2	1729.96	2.46793	78.6932	0
High	eLAEAEDVSIFk	4	1	1	P29419	N-Term(TMT10); K12(TMT10)	0	1.00506	4	3.70145	0.99883	4	3.96493	0.969922	4	2.40773	0.996196	4	3.70194	1.01178	4	2.45444	1.03558	4	1.85833	1.01634	4	2.33312	0.999375	4	4.71692	1.04019	4	1.24097	0	4.171e-09	86.15	8.16554e-08	2	1809.01	1.62556	85.1854	0
High	dSESSPNDFSVSLk	2	3	1	A0A0G2JUA7	N-Term(TMT10); K14(TMT10)	0	0.983838	2	6.13299	1.00732	2	0.639341	1.01682	2	1.06157	1.00548	2	3.35435	0.988499	2	4.37467	1.03369	2	1.15507	0.962673	2	0.268762	1.01218	2	2.58058	1.00425	2	2.34101	0	2e-11	86.15	4.70762e-08	2	1970.02	2.08298	72.7596	0
High	gTVLAEDQLAQMSk	1	1	1	Q5RK19	N-Term(TMT10); K14(TMT10)	0	0.950893	1		0.977619	1		1.00478	1		1.00222	1		1.06484	1		1.02071	1		1.04906	1		1.02706	1		0.897973	1		0	2.47e-11	86.13	8.64204e-08	2	1949.08	2.47496	77.6623	0
High	eIADGLcLEVEGk	6	1	1	P63029	N-Term(TMT10); C7(Carbamidomethyl); K13(TMT10)	0	1.09888	6	7.52473	1.10353	6	3.74923	1.02243	6	3.60745	1.05537	6	1.51839	0.818449	6	2.73896	1.08382	6	1.77969	0.81748	6	4.75192	0.858426	6	8.67738	1.1933	6	3.60528	0	4.535e-10	86.12	7.03708e-08	2	1891.03	2.67762	84.0098	0
High	tYGEPESVGMSk	1	2	1	Q63190	N-Term(TMT10); K12(TMT10)	0	0.975489	1		1.08442	1		0.957818	1		0.967398	1		1.05715	1		0.931883	1		1.09376	1		1.01846	1		0.990447	1		0	1.481e-09	86.07	3.84353e-08	2	1742.91	1.49763	60.7449	0
High	aHAAVWNAQEAQADFAk	1	1	1	Q5FWY5	N-Term(TMT10); K17(TMT10)	0	1.06068	1		1.0399	1		0.988022	1		1.02795	1		0.918239	1		1.03794	1		0.935633	1		0.9631	1		1.07938	1		0	7.282e-13	86.05	6.77895e-08	2	2286.2	-0.0230519	69.9813	0
High	sVSLTGAPESVQk	2	3	1	M0R961	N-Term(TMT10); K13(TMT10)	0	1.03865	2	5.67552	1.08603	2	2.37766	1.01522	2	4.86481	0.966429	2	1.02584	1.00826	2	2.7451	0.963814	2	0.815633	1.02692	2	7.15014	0.982671	2	4.18263	0.9701	2	9.24654	0	3.585e-10	86.03	8.15732e-08	2	1761.02	2.50762	63.5689	0
High	gHAYSVTGAEEVESSGSLQk	1	1	1	Q07009	N-Term(TMT10); K20(TMT10)	0	1.08618	1		1.01683	1		0.888228	1		0.895123	1		0.972612	1		0.907906	1		0.960105	1		0.9814	1		1.50423	1		0	6.426e-13	86.03	5.88724e-08	3	2494.29	1.90129	63.4773	0
High	sPSTGLYANLEk	2	2	1	Q5RJQ4	N-Term(TMT10); K12(TMT10)	0	0.921776	2	5.78675	0.890359	2	1.08262	0.998244	2	3.05609	1.04126	2	4.84541	1.01247	2	4.26409	1.08175	2	2.10102	1.02131	2	6.86619	1.04038	2	4.48812	0.947924	2	4.68581	0	2.42e-09	86.02	7.9761e-08	2	1737.98	1.70989	69.494	0
High	lQDTYNLDTNTISk	4	1	1	P54001	N-Term(TMT10); K14(TMT10)	0	1.22476	4	5.5653	1.17706	4	8.02286	0.888947	4	4.5353	0.985369	4	0.778081	0.930623	4	3.17737	0.938026	4	1.08446	0.910493	4	4.8374	0.916484	4	5.86471	1.22908	4	3.65748	0	2.781e-11	86	7.25935e-08	2	2084.13	1.34511	76.9099	0
High	gADYLVTEVENGGSLGSk	4	4	2	P11980;Q6P7S0	N-Term(TMT10); K18(TMT10)	0																												0	5.332e-12	85.96	6.57866e-08	2	2254.2	1.31281	86.21	0
High	eLGSLEEDANPDEEGVQk	2	2	1	B2RYF8	N-Term(TMT10); K18(TMT10)	0	1.09358	2	11.9719	1.07169	2	19.8751	0.951985	2	5.94522	0.940449	2	3.75758	0.943426	2	11.3649	1.01001	2	0.191691	0.953911	2	11.9446	0.990021	2	9.38741	1.12685	2	16.0223	0	1.09e-14	85.88	5.31946e-08	2	2417.21	2.2379	73.0238	0
High	nmGGPYGGGNYGPGGSGGSGGYGGR	1	4	1	F1LM82	N-Term(TMT10); M2(Oxidation)	0	0.959527	1		0.949947	1		1.03622	1		0.920435	1		1.05129	1		0.886459	1		1.13376	1		1.16265	1		0.943567	1		0	1.619e-13	85.85	4.16026e-09	3	2435.07	3.79275	53.119	0
High	lTFDTTFSPNTGk	3	1	1	P81155	N-Term(TMT10); K13(TMT10)	0	0.966688	3	7.33811	0.955907	3	3.24349	0.999132	3	5.44828	1.03054	3	0.483002	0.983684	3	1.27389	1.01484	3	0.0510254	0.960866	3	0.656877	1.06581	3	1.08205	0.95664	3	5.00092	0	9.962e-09	85.8	6.64143e-08	2	1887.03	1.337	82.3426	0
High	tEGHEETPLPPAQSQTQEGGPAAGk	1	2	1	F1LQZ9	N-Term(TMT10); K25(TMT10)	0	0.79772	1		0.883322	1		1.08042	1		1.14565	1		0.946974	1		1.1064	1		1.036	1		1.03317	1		0.833479	1		0	1.353e-13	85.8	5.48411e-08	3	2975.52	1.87278	53.4855	0
High	gVGIISEGNETVEDIAAR	3	3	1	P06685	N-Term(TMT10)	0	0.963652	3	1.48877	0.980304	3	0.191113	0.971009	3	3.91553	1.036	3	6.458	0.997473	3	0.693211	1.06323	3	0.512885	1.00815	3	0.708489	0.948907	3	0.114079	1.06629	3	4.82286	0	2.98e-13	85.78	6.4739e-08	2	2059.09	0.226626	83.3012	0
High	gEWcGVELDEPLGk	1	8	2	A0A0G2JZF2;A0A0G2K681	N-Term(TMT10); C4(Carbamidomethyl); K14(TMT10)	0																												0	4.204e-11	85.71	5.26328e-08	2	2047.06	2.40345	84.8316	0
High	dAGQISGLNVLR	2	2	1	F1M953	N-Term(TMT10)	0	0.810969	2	22.9505	0.82911	2	16.4664	1.08776	2	5.44441	1.04293	2	6.90553	1.10077	2	4.76109	1.03928	2	18.8582	1.06911	2	1.13041	1.11929	2	3.05965	0.749734	2	22.7921	0	1.363e-08	85.7	6.99799e-08	2	1471.85	1.73616	73.9634	0
High	sDIGEVILVGGMTR	2	2	1	F1M953	N-Term(TMT10)	0	0.687758	2	0.74665	0.674445	2	0.0366114	1.17488	2	0.493476	1.11457	2	0.275468	1.1563	2	2.48086	1.05062	2	1.20013	1.13968	2	1.31367	1.16874	2	0.165708	0.596384	2	0.605303	0	1.658e-10	85.69	7.02761e-08	2	1675.93	0.135607	87.3198	0
High	tLVEMSDNTAVFk	2	1	1	Q5EAJ6	N-Term(TMT10); K13(TMT10)	0	1.14249	2	3.3274	1.14811	2	3.73288	0.929004	2	0.165373	0.966228	2	1.09414	0.970981	2	2.68281	0.93975	2	1.23159	1.00686	2	2.62834	0.971843	2	3.22381	1.06097	2	1.96217	0	1.772e-10	85.69	6.97366e-08	2	1913.05	1.83084	83.0738	0
High	sMVAVMDSDTTGk	2	2	1	M0RD20	N-Term(TMT10); K13(TMT10)	0	0.964445	2	1.7447	1.01979	2	0.304933	0.980262	2	2.92981	1.0057	2	1.77402	1.0002	2	1.25307	1.02773	2	1.50114	1.04699	2	4.87581	0.990742	2	0.102842	0.985573	2	6.86268	0	3.543e-10	85.68	4.61025e-08	2	1799.93	1.88062	70.3852	0
High	dAVFIPAGWDNEk	1	8	1	A0A096MIY2	N-Term(TMT10); K13(TMT10)	0	0.876604	1		0.861907	1		1.03789	1		1.08727	1		0.995351	1		1.08201	1		1.01351	1		1.04518	1		0.920429	1		0	1.173e-08	85.68	6.6247e-08	2	1920.03	0.55433	85.7346	0
High	tSIAIDTIINQk	4	2	1	F1LP05	N-Term(TMT10); K12(TMT10)	0	0.908778	4	4.44264	0.935833	4	2.68662	1.03196	4	1.6225	1.00751	4	0.597967	1.0977	4	3.14916	0.946983	4	2.72459	1.101	4	4.16429	1.05514	4	3.76608	0.942617	4	13.5931	0	1.109e-08	85.65	7.88222e-08	2	1775.07	2.05935	84.1967	0
High	lGTDEScFNMILATR	1	2	1	Q6IRJ7	N-Term(TMT10); C7(Carbamidomethyl)	0	0.954597	1		0.986336	1		1.07314	1		1.05521	1		0.95518	1		1.06439	1		0.905683	1		1.00349	1		0.969001	1		0	3.287e-12	85.65	3.68926e-08	2	1956.98	1.53704	87.9725	0
High	sTVEGIQASVk	3	3	1	P85972	N-Term(TMT10); K11(TMT10)	0	1.1799	3	2.9456	1.13398	3	3.84168	0.967083	3	0.275649	0.953691	3	1.24716	0.976472	3	2.05762	0.930698	3	4.68704	0.974988	3	1.63285	0.934353	3	3.77302	1.08993	3	8.83467	0	4.27e-08	85.63	8.94433e-08	2	1576.94	2.69829	61.9883	0
High	vQGLTVEQAEAVAR	3	3	1	F1LRT9	N-Term(TMT10)	0	0.93032	3	11.7306	0.933121	3	3.04092	1.02087	3	6.59906	1.04453	3	0.183915	1.03494	3	2.46906	0.986412	3	1.09944	1.02405	3	6.48222	1.05393	3	5.42494	0.882106	3	0.674407	0	2.714e-11	85.63	7.89125e-08	2	1699.96	2.04348	70.9392	0
High	aGTQIENIDEDFR	2	4	1	Q9QXQ0	N-Term(TMT10)	0	0.945167	2	2.44384	0.993183	2	1.26483	1.01076	2	0.736087	1.02315	2	0.602741	1.06924	2	2.26908	1.01343	2	1.28713	0.992246	2	1.60474	0.998437	2	2.94224	0.955577	2	0.892019	0	3.731e-10	85.63	3.24129e-08	2	1736.87	1.7275	75.0679	0
High	qADLSFSSPVEMk	1	3	1	A0A0G2K7B3	N-Term(TMT10); K13(TMT10)	0	1.03238	1		1.01409	1		0.962373	1		1.00025	1		1.01012	1		0.97999	1		1.03791	1		1.01116	1		1.0094	1		0	1.603e-10	85.61	6.84226e-08	2	1897.02	0.971794	79.9906	0
High	gSFSEQGINEFLR	3	2	1	Q63081	N-Term(TMT10)	0	1.22228	3	14.7024	1.21992	3	17.1024	0.885286	3	6.4993	0.911823	3	0.523553	0.900705	3	9.83071	0.919036	3	0.992195	0.857376	3	1.237	0.907045	3	9.00211	1.36205	3	3.55313	0	3.959e-10	85.58	4.51011e-08	2	1712.88	1.11542	85.661	0
High	tLSSVQSEVQEALQR	1	1	1	F1MA98	N-Term(TMT10)	0	0.981652	1		0.957233	1		0.968706	1		0.959912	1		1.03125	1		0.966757	1		1.03116	1		1.15385	1		0.994979	1		0	6.562e-12	85.58	8.0103e-08	2	1904.03	2.19598	87.2961	0
High	vcENIPIVLcGNk	5	3	1	P62828	N-Term(TMT10); C2(Carbamidomethyl); C10(Carbamidomethyl); K13(TMT10)	0	1.21444	5	9.81408	1.22747	5	5.58244	1.04225	5	0.474717	1.09805	5	2.60617	0.819157	5	1.43425	1.04946	5	2.81037	0.746631	5	17.8853	0.767002	5	11.6166	1.14302	5	14.2486	0	4.093e-10	85.55	8.67877e-08	2	1974.09	1.04569	81.8416	0
High	aNEEDEQEEGGDGASGDPk	13	1	1	Q62785	N-Term(TMT10); K19(TMT10)	0	0.960313	13	22.4277	0.856414	13	14.9032	1.01138	13	8.28761	1.01412	13	9.66237	1.00597	13	7.65361	0.927682	13	11.0537	1.10616	13	10.6058	1.10576	13	7.31347	0.928399	13	25.8892	0	5.861e-11	85.53	8.81679e-09	3	2392.08	2.16769	44.7173	0
High	gADQEIGSAVSAAQR	1	2	1	A0A096MIS3	N-Term(TMT10)	0	0.99024	1		1.02832	1		1.03149	1		1.04964	1		0.919183	1		1.06996	1		0.926534	1		0.944127	1		1.04554	1		0	8.238e-12	85.51	4.97706e-08	2	1688.88	2.78284	59.3842	0
High	aSNLENSTYDLYTIPk	2	2	1	B5DFK1	N-Term(TMT10); K16(TMT10)	0	1.06531	2	0.342722	1.07783	2	5.75858	0.900404	2	0.657788	0.975594	2	1.59993	0.924079	2	6.28188	1.07054	2	8.2806	0.893058	2	0.0667947	0.925711	2	4.25753	1.2807	2	6.63476	0	1.472e-10	85.51	7.87332e-08	2	2287.22	0.413965	84.5068	0
High	dGTcTVSYLPTAPGDYSIIVR	1	2	1	A0A0H2UHR7	N-Term(TMT10); C4(Carbamidomethyl)	0	1.08475	1		1.06712	1		0.953466	1		0.985122	1		1.01525	1		0.974865	1		0.990043	1		0.961783	1		1.06036	1		0	4.433e-13	85.51	4.963e-08	2	2514.28	0.918717	86.9818	0
High	lPAcVVDcGTGYTk	4	2	1	Q4V7C7	N-Term(TMT10); C4(Carbamidomethyl); C8(Carbamidomethyl); K14(TMT10)	0	1.0165	4	4.33355	1.05634	4	11.0462	1.03268	4	2.59486	1.04754	4	6.10718	0.850327	4	4.76962	1.07278	4	2.11516	0.903462	4	13.201	0.872208	4	17.2968	1.10565	4	7.65547	0	8.248e-11	85.5	6.05952e-08	2	1999.04	1.8324	74.9527	0
High	rPQYSNPPVQGEVMEGADNQGAGEQGRPVR	2	4	1	P62961	N-Term(TMT10)	0	1.09652	2	11.0332	0.954837	2	12.8165	0.982997	2	2.39271	0.890093	2	8.745	1.03067	2	2.66867	0.932799	2	6.76514	1.07192	2	14.2063	0.981767	2	19.5653	1.14542	2	16.7486	0	8.056e-16	85.5	4.15711e-08	4	3452.7	1.39289	55.3635	0
High	aTAVMPDGQFk	5	2	1	A0A0G2K3Z9	N-Term(TMT10); K11(TMT10)	0	0.954161	5	8.75539	0.946884	5	5.3769	1.02329	5	1.82874	1.07556	5	1.11698	0.978779	5	2.81547	1.10596	5	8.12522	0.972327	5	5.00969	0.982536	5	5.81971	0.97771	5	2.00857	0	5.903e-08	85.48	8.90473e-08	2	1622.9	1.90963	66.9679	0
High	aIVAGDQNVEYk	3	4	1	Q9WUH4	N-Term(TMT10); K12(TMT10)	0	1.07721	3	1.30818	1.11467	3	4.93996	0.913985	3	2.70867	0.972902	3	1.4934	0.949376	3	4.9615	0.98753	3	0.360562	0.904318	3	1.16593	0.924693	3	2.24898	1.32854	3	1.19048	0	1.694e-09	85.48	9.27281e-08	2	1764.99	1.79613	65.3729	0
High	kDLYANTVLSGGTTmYPGIADR	2	5	1	P60711	N-Term(TMT10); K1(TMT10); M15(Oxidation)	0	0.935946	2	12.7297	0.965915	2	4.72498	0.97075	2	5.29132	1.02903	2	2.73246	1.03961	2	6.67017	0.992564	2	4.73855	1.03066	2	3.44524	1.03283	2	0.0868975	1.01617	2	1.42089	0	3.232e-10	85.48	7.54566e-08	4	2817.49	1.62444	77.74	1
High	gTELDcGIETDSGTDDDMAcQk	1	1	1	P55213	N-Term(TMT10); C6(Carbamidomethyl); C20(Carbamidomethyl); K22(TMT10)	0	1.18843	1		1.22386	1		0.953934	1		0.93773	1		0.939267	1		0.966102	1		0.928544	1		0.901244	1		1.12409	1		0	5.817e-13	85.48	4.53023e-09	3	2876.26	-1.60796	68.7768	0
High	sLTNDWEDHLAVk	4	2	1	P34058	N-Term(TMT10); K13(TMT10)	0	1.08445	4	5.6925	1.12776	4	6.27798	0.861063	4	3.04139	1.06406	4	1.60873	0.885351	4	1.10306	1.08272	4	1.64952	0.846458	4	4.00979	0.836731	4	5.21864	1.26778	4	4.69744	0	5.354e-10	85.41	8.20059e-08	2	1986.07	2.04059	77.6955	0
High	aLAGcDFLTISPk	3	1	1	Q9EQS0	N-Term(TMT10); C5(Carbamidomethyl); K13(TMT10)	0	1.05094	3	1.67617	1.10993	3	1.39303	1.06615	3	1.5384	1.12367	3	1.72751	0.813712	3	4.06017	1.10322	3	2.77714	0.797413	3	10.0524	0.801768	3	0.272036	1.14038	3	3.49162	0	6.892e-10	85.4	9.04144e-08	2	1851.05	2.36989	86.2954	0
High	kGSDEVTASSAATGTSPR	2	4	1	F1LPH1	N-Term(TMT10); K1(TMT10)	0	0.85334	2	7.6798	0.881362	2	20.1368	1.07557	2	8.0307	0.92863	2	0.0230515	1.14014	2	0.731725	0.838622	2	2.46972	1.2065	2	2.01687	1.1421	2	11.4097	0.92738	2	12.886	0	1.76e-13	85.4	8.00319e-08	3	2180.16	-0.0634788	45.6692	1
High	tQTAIASEDMPNTLTEAEk	3	4	1	A0A0G2JZY6	N-Term(TMT10); K19(TMT10)	0	1.01439	3	3.39367	1.00925	3	0.403613	1.01746	3	0.367513	0.952605	3	1.96995	1.04765	3	1.50215	0.949023	3	1.62529	1.06576	3	2.60707	1.06453	3	2.05963	0.969082	3	3.05024	0	7.582e-15	85.4	6.84957e-08	2	2508.29	0.0476988	73.6426	0
High	qNQADQVEVVFR	1	1	1	D4A833	N-Term(TMT10)	0	0.882335	1		0.88096	1		1.07304	1		0.937707	1		1.0753	1		0.928818	1		1.20862	1		1.17275	1		0.811404	1		0	1.851e-09	85.38	6.09891e-08	2	1661.88	1.97942	69.0232	0
High	iLVGPSEIGDASk	1	2	1	A0A0H2UHR7	N-Term(TMT10); K13(TMT10)	0	1.07423	1		1.10739	1		0.964415	1		0.950547	1		0.918633	1		0.963431	1		0.997398	1		0.985006	1		1.16055	1		0	2.309e-07	85.38	8.5037e-08	2	1744.03	1.01381	79.2215	0
High	qGFDLNVPGGEIDASLk	1	2	1	A0A0G2JUA5	N-Term(TMT10); K17(TMT10)	0	1.20609	1		1.14717	1		0.927282	1		0.93187	1		0.972421	1		0.949562	1		0.947981	1		0.955796	1		1.12849	1		0	2.104e-10	85.36	9.9401e-08	2	2218.22	1.6042	87.6986	0
High	vMVQINTSGEDSk	1	1	1	D3ZCA0	N-Term(TMT10); K13(TMT10)	0	0.796552	1		0.83839	1		1.03866	1		1.13432	1		1.05507	1		1.10019	1		1.04395	1		1.04449	1		0.816305	1		0	3.363e-10	85.34	8.53852e-08	2	1866.01	1.28947	68.9852	0
High	qVATALQNLQTk	2	3	1	P85972	N-Term(TMT10); K12(TMT10)	0	1.12661	2	3.87743	1.12263	2	2.67693	0.948255	2	3.85796	0.95117	2	4.77348	1.00482	2	4.86345	0.898288	2	7.07273	0.993063	2	2.42112	1.00225	2	4.43774	1.09334	2	0.179826	0	2.215e-09	85.33	8.35305e-08	2	1773.07	1.80066	74.7753	0
High	fEDGDLTLYQSNAILR	2	2	1	P04906	N-Term(TMT10)	0	0.713763	2	11.6235	0.756768	2	33.5666	1.14816	2	0.304804	1.10266	2	13.7438	1.01303	2	15.6346	1.17238	2	2.70295	1.07133	2	5.53287	1.09195	2	3.5659	0.665556	2	24.0418	0	1.591e-12	85.32	7.00629e-08	2	2084.09	2.11146	87.5557	0
High	eFLAEGQDVGSFVAEk	4	3	1	D4AD15	N-Term(TMT10); K16(TMT10)	0	0.930897	4	6.37491	0.976756	4	7.74649	0.975396	4	1.72079	1.03189	4	1.59227	0.935831	4	4.48576	1.10411	4	2.40428	0.954307	4	2.58195	1.00977	4	7.724	0.981154	4	9.1324	0	1.27e-12	85.3	8.02729e-08	2	2184.16	2.13195	87.1308	0
High	gFGFVTFENSADADR	1	5	1	A0A249Y6E1	N-Term(TMT10)	0	1.01685	1		1.08811	1		0.989672	1		0.969981	1		0.984809	1		1.02072	1		0.92715	1		0.990343	1		1.0803	1		0	1.817e-11	85.29	2.0854e-08	2	1861.89	1.049	86.7641	0
High	gSLLWNQQDGTLSATQR	1	1	1	Q6AYH6	N-Term(TMT10)	0	0.972246	1		0.938279	1		0.93054	1		1.05897	1		0.96851	1		1.07286	1		0.969933	1		1.04065	1		1.05964	1		0	1.762e-12	85.28	7.08595e-08	2	2104.11	3.67162	75.9654	0
High	aEQINQAAGEASAVLAk	1	1	1	Q4FZT0	N-Term(TMT10); K17(TMT10)	0	0.849885	1		0.869522	1		1.02295	1		1.07473	1		1.03729	1		1.08716	1		1.04507	1		0.994319	1		0.945713	1		0	9.595e-13	85.28	9.65053e-08	2	2129.2	1.06937	82.9447	0
High	eGGGDSSASSPTEEEQEQGEISAcSDEGTAQEGk	1	2	1	A0A0G2K613	N-Term(TMT10); C24(Carbamidomethyl); K34(TMT10)	0	1.00752	1		1.0643	1		0.988055	1		0.963369	1		0.950707	1		1.03976	1		1.04392	1		0.899033	1		1.1082	1		0	7.126e-15	85.27	3.26883e-09	4	3901.7	-0.77265	58.8298	0
High	aPPAPGAVSGSSGEVDELFDVk	1	2	1	G3V8Q1	N-Term(TMT10); K22(TMT10)	0	0.991255	1		1.09514	1		0.923486	1		0.960394	1		0.951681	1		0.992196	1		0.969437	1		0.980759	1		1.2559	1		0	2.715e-10	85.26	7.47608e-08	2	2587.37	1.53871	86.5302	0
High	tTLQVDTLNTELAAER	2	2	1	G3V9Y1	N-Term(TMT10)	0	0.940812	2	2.10963	0.961031	2	0.373179	1.08545	2	4.3679	0.96499	2	5.90365	1.04134	2	5.29334	0.956263	2	8.62502	1.10332	2	8.75011	1.08059	2	7.65856	0.843371	2	2.82588	0	6.536e-13	85.25	7.83663e-08	2	2004.08	-0.0204651	78.3258	0
High	dANNPAEDGDAk	5	1	1	P18437	N-Term(TMT10); K12(TMT10)	0	1.06738	5	9.09313	1.16228	5	12.1218	0.888964	5	10.7635	0.8795	5	11.9353	0.97744	5	14.0898	0.923448	5	4.55664	0.949433	5	6.84973	0.959879	5	23.566	1.09975	5	2.28569	0	3.248e-09	85.23	3.569e-08	2	1674.84	1.2142	43.3875	0
High	vPVGDQPPDIEYQIk	1	3	1	A0A0A0MY48	N-Term(TMT10); K15(TMT10)	0	1.0304	1		1.01125	1		0.945188	1		1.02769	1		0.994876	1		1.02241	1		0.970146	1		0.989838	1		1.06063	1		0	4.956e-09	85.22	9.06332e-08	2	2156.2	0.599413	81.6607	0
High	eGVIEcSFVQSk	4	2	1	P04636	N-Term(TMT10); C6(Carbamidomethyl); K12(TMT10)	0	1.01512	4	0.969502	1.02949	4	2.49881	0.957233	4	3.41166	1.05762	4	1.31545	0.940092	4	2.31975	1.0676	4	1.01021	0.958608	4	8.36125	0.923348	4	4.26925	1.0523	4	4.45573	0	3.828e-09	85.21	8.19538e-08	2	1840.99	1.58775	74.4562	0
High	tGDLPAFGEcVGIASk	1	3	1	D3ZA84	N-Term(TMT10); C10(Carbamidomethyl); K16(TMT10)	0	1.02114	1		0.985634	1		1.03958	1		1.03787	1		0.965544	1		1.00432	1		1.01408	1		0.953841	1		0.990625	1		0	3.744e-13	85.19	7.77917e-08	2	2080.11	-0.211406	83.6145	0
High	aGALQcSPSDVYTk	1	2	1	G3V852	N-Term(TMT10); C6(Carbamidomethyl); K14(TMT10)	0	1.23353	1		1.26705	1		0.925138	1		0.997476	1		0.827807	1		1.04178	1		0.770357	1		0.832318	1		1.28437	1		0	1.697e-11	85.11	6.6751e-08	2	1955.03	1.33275	63.2515	0
High	qAPSIATIGSTcDLNLk	3	2	1	A0A0H2UHR7	N-Term(TMT10); C12(Carbamidomethyl); K17(TMT10)	0	1.0219	3	0.738965	1.15252	3	0.0952845	0.976626	3	2.77568	0.971097	3	1.77678	0.938559	3	0.738511	1.03479	3	3.3605	0.94606	3	7.83162	0.918937	3	2.55767	1.07947	3	0.227194	0	3.603e-12	85.08	1.00433e-07	2	2247.24	1.09604	83.0961	0
High	aIEEEGGNPDEIEVISEGNk	1	3	1	M0RBF0	N-Term(TMT10); K20(TMT10)	0	1.08216	1		1.09791	1		0.924841	1		0.960493	1		0.918421	1		1.02326	1		0.925426	1		0.987005	1		1.20113	1		0	1.57e-14	85.08	5.97628e-08	2	2587.32	2.06323	77.826	0
High	nAQEALEAIETk	2	1	1	D3ZZ62	N-Term(TMT10); K12(TMT10)	0	0.656383	2	3.07328	0.693762	2	6.19425	1.13761	2	0.075355	1.08194	2	1.9961	1.14662	2	6.80621	1.1287	2	3.72641	1.15238	2	1.81466	1.14414	2	3.0348	0.61735	2	2.65004	0	1.165e-09	85.06	9.12275e-08	2	1775	1.03129	83.5822	0
High	aAAFEDQENETVVVk	2	2	1	G3V852	N-Term(TMT10); K15(TMT10)	0	0.985603	2	3.15697	1.08328	2	4.09627	0.96573	2	2.2594	0.972538	2	1.59963	0.915561	2	2.47645	1.03427	2	1.5911	0.96489	2	1.40738	1.00085	2	1.8702	1.15005	2	5.78761	0	2.954e-12	85.05	8.31537e-08	2	2108.13	1.77406	71.2949	0
High	hLEINPDHPIVETLR	7	2	1	P34058	N-Term(TMT10)	0	0.93165	7	7.75644	0.80514	7	6.24625	1.10354	7	7.37884	0.994057	7	2.09848	1.11696	7	2.35843	0.94043	7	4.88127	1.10632	7	3.29359	1.13598	7	3.21021	0.837891	7	3.6844	0	1.124e-11	85.03	9.40582e-08	2	2012.12	2.30795	66.2107	0
High	aVGQEAPLATTGVGTEDk	1	3	1	G3V8F8	N-Term(TMT10); K18(TMT10)	0	1.57393	1		1.56464	1		0.759656	1		0.81073	1		0.809382	1		0.762467	1		0.805398	1		0.77562	1		1.65523	1		0	9.471e-14	85.02	1.02931e-07	2	2202.2	0.801733	64.5393	0
High	eELQLLQEQGSYVGEVVR	1	1	1	P62198	N-Term(TMT10)	0	0.894967	1		0.946264	1		0.974915	1		1.07582	1		0.938699	1		1.09575	1		0.981218	1		1.08548	1		0.967676	1		0	3.888e-13	85.02	9.28586e-08	2	2305.22	0.268752	87.9394	0
High	lGHVVMGNNAVSPYQQVIEk	2	2	1	A0A0G2K273	N-Term(TMT10); K20(TMT10)	0	1.02656	2	12.5067	1.04514	2	4.74803	0.935727	2	2.03365	1.00507	2	4.53191	0.927489	2	3.17503	1.09699	2	0.944609	0.908354	2	6.23073	0.955907	2	1.28839	1.15498	2	0.912135	0	2.881e-12	85.01	9.40191e-08	3	2641.46	1.84973	79.5274	0
High	sTESLQANVQR	4	4	1	D3ZRM9	N-Term(TMT10)	0	0.955494	4	8.19509	1.0449	4	4.74565	1.02226	4	2.89888	1.00977	4	6.05287	0.980864	4	4.51774	0.981893	4	3.65614	1.03438	4	3.83917	0.96316	4	2.28274	1.01961	4	4.74632	0	1.232e-08	84.99	7.60696e-08	2	1461.79	1.58868	49.7033	0
High	dELADEIANSSGk	4	2	1	G3V6P7	N-Term(TMT10); K13(TMT10)	0	0.938651	4	4.07001	0.963236	4	2.87176	0.999677	4	0.375086	1.02044	4	0.230113	1.03756	4	4.71715	1.00489	4	3.823	1.05574	4	2.53569	1.02061	4	1.26415	0.984595	4	2.1801	0	2.442e-10	84.97	6.87787e-08	2	1806.95	2.11676	73.2918	0
High	iEDGNNFGVAVQEk	4	2	1	Q6P9V7	N-Term(TMT10); K14(TMT10)	0	0.944646	4	2.88592	0.932452	4	2.6671	1.02428	4	1.22818	1.10057	4	0.748807	0.985256	4	3.75179	1.10454	4	1.44019	0.928905	4	2.4401	0.977811	4	2.48946	0.93939	4	1.61027	0	1.534e-08	84.96	8.93631e-08	3	1978.07	1.51957	73.2389	0
High	lEQYTNAIEGTk	3	3	1	G3V9E3	N-Term(TMT10); K12(TMT10)	0	1.0333	3	5.04563	0.966223	3	6.74854	0.95429	3	0.694815	1.01909	3	0.816919	1.04425	3	0.129147	1.0189	3	0.538161	0.98391	3	5.77146	1.06759	3	5.359	0.967655	3	4.42755	0	1.864e-09	84.95	9.51671e-08	2	1825.01	2.13737	79.2198	0
High	sEALAGAPLDNAPk	1	1	1	D3ZXF9	N-Term(TMT10); K14(TMT10)	0	0.848113	1		0.809724	1		1.0466	1		1.03657	1		1.09247	1		1.0447	1		1.09917	1		1.09646	1		0.837367	1		0	1.065e-10	84.94	1.05967e-07	2	1812.03	0.924203	65.1146	0
High	vDQSAVGFEYQGk	4	5	1	D3ZGE6	N-Term(TMT10); K13(TMT10)	0	1.04475	4	4.41224	1.0506	4	4.96322	0.962163	4	6.41427	1.03336	4	4.23162	0.954639	4	2.77992	1.00348	4	3.98618	0.954192	4	5.63659	0.970131	4	2.69991	1.07037	4	3.91329	0	2.373e-10	84.93	6.8451e-08	2	1886.01	1.41001	69.527	0
High	sNLVDNTNQVEVLQR	2	7	1	Q68FX3	N-Term(TMT10)	0	0.968049	2	0.601502	0.903843	2	0.0620822	0.983409	2	4.39328	0.953754	2	1.90803	1.07323	2	0.402674	1.03359	2	0.0683492	1.09805	2	1.69795	1.08147	2	4.43655	0.902855	2	5.23704	0	3.907e-12	84.93	7.42356e-08	2	1958.05	0.35329	67.0605	0
High	sYLTEQVNQDLPk	3	2	1	B2RYG2	N-Term(TMT10); K13(TMT10)	0	0.734677	3	24.2836	0.723445	3	18.5256	1.04559	3	1.74927	1.08465	3	3.73163	1.1406	3	0.728599	1.1085	3	9.0084	1.17354	3	2.86084	1.10478	3	10.2816	0.686317	3	0.47516	0	2.829e-10	84.92	1.02913e-07	2	1993.1	1.02023	77.1861	0
High	gFGFVTFDDHDPVDk	7	4	1	F1LM82	N-Term(TMT10); K15(TMT10)	0	1.14376	7	1.50459	1.20848	7	5.29454	0.904626	7	5.03939	0.99759	7	1.93624	0.89204	7	7.98372	0.976871	7	2.88077	0.868889	7	2.82981	0.914042	7	8.97714	1.30954	7	2.43887	0	2.465e-11	84.92	6.08782e-08	2	2154.1	2.03665	85.3088	0
High	gIVDQSQQAYQEAFEISk	6	2	1	P63102	N-Term(TMT10); K18(TMT10)	0	0.944944	6	4.89695	1.02169	6	2.80634	0.963012	6	1.39621	1.04642	6	3.60641	0.960906	6	8.6453	1.09551	6	4.80186	0.944837	6	4.73122	0.951731	6	3.97245	1.06613	6	3.49212	0	4.838e-13	84.91	8.15195e-08	2	2499.32	1.10041	86.7806	0
High	cLYASVLTAQPR	4	2	1	P05197	N-Term(TMT10); C1(Carbamidomethyl)	0	1.01893	4	1.27331	0.985973	4	3.53871	0.992242	4	2.87835	0.986211	4	2.03598	1.05818	4	4.44959	0.955038	4	2.08908	1.06794	4	0.778815	1.01436	4	1.66555	0.937576	4	1.88296	0	5.848e-09	84.9	8.76939e-08	2	1607.88	2.1294	75.8251	0
High	aNAGEESVMNLDk	2	2	1	Q920L2	N-Term(TMT10); K13(TMT10)	0	0.909937	2	16.8385	0.968125	2	10.1325	0.990263	2	5.51464	1.01616	2	1.90769	1.06139	2	10.2675	1.01307	2	1.63799	1.01046	2	11.413	1.0187	2	7.41265	0.998342	2	14.3726	0	4.497e-10	84.9	7.10288e-08	2	1835.97	4.86986	67.4324	0
High	mEEQGLADASLLk	1	1	1	Q9ER24	N-Term(TMT10); K13(TMT10)	0	1.08401	1		1.14543	1		0.933305	1		0.94887	1		1.01656	1		0.903532	1		1.01541	1		0.982889	1		1.11721	1		0	2.394e-10	84.89	9.56802e-08	2	1863.03	1.95357	82.3012	0
High	gGGGPGGEQETQELASk	1	2	1	A0A0G2JUX5	N-Term(TMT10); K17(TMT10)	0	1.09547	1		1.02535	1		0.963182	1		1.02298	1		1.03255	1		0.988456	1		0.922053	1		0.897303	1		1.13911	1		0	1.847e-13	84.89	6.58409e-08	2	2060.07	2.29268	56.736	0
High	sSGAGSTSDAYTVIQVGR	1	1	1	A0A0G2K4A0	N-Term(TMT10)	0	1.02875	1		0.990383	1		0.987905	1		0.928179	1		1.062	1		0.944291	1		1.09038	1		1.08749	1		0.94098	1		0	2.269e-13	84.85	5.36839e-08	2	1985.02	2.67366	66.9121	0
High	vAVGELTDEDVk	1	1	1	D3ZP96	N-Term(TMT10); K12(TMT10)	0	1.55146	1		1.63592	1		0.851893	1		0.849456	1		0.740503	1		0.799736	1		0.761054	1		0.781716	1		1.481	1		0	2.587e-09	84.78	1.10277e-07	2	1732.98	1.44398	72.9811	0
High	tGAEGAVLDEAk	1	6	1	Q2PQA9	N-Term(TMT10); K12(TMT10)	0	1.06786	1		1.06913	1		1.01774	1		0.924309	1		1.0407	1		0.879802	1		1.0481	1		1.02537	1		1.03374	1		0	4.547e-09	84.75	9.647e-08	2	1618.91	1.97637	62.0313	0
High	lTVDTIFVPNTGk	4	2	1	A0A0G2JSR0	N-Term(TMT10); K13(TMT10)	0	1.03116	4	6.9272	1.07106	4	4.06141	0.955655	4	0.504562	0.991403	4	0.469262	1.00078	4	0.720119	0.980554	4	2.35769	0.940074	4	3.2246	0.968962	4	3.08815	1.07727	4	1.70157	0	3.489e-09	84.75	9.46277e-08	2	1863.1	2.06089	86.7553	0
High	vDINAPEVEVQGk	5	3	2	A0A0G2JUA5;Q38PF9	N-Term(TMT10); K13(TMT10)	0																												0	1.271e-09	84.74	1.08275e-07	2	1856.06	1.11851	72.9974	0
High	eVSFQTTGDSEWR	4	1	1	O35796	N-Term(TMT10)	0	0.919415	4	5.42739	0.935262	4	4.96811	0.997745	4	1.53508	1.04807	4	3.95101	1.02907	4	1.90034	1.06638	4	2.55021	0.995698	4	3.62629	1.02236	4	4.37253	0.916872	4	2.95455	0	4.983e-10	84.73	2.43971e-08	2	1770.85	1.64517	70.1786	0
High	vTWDSTFcAVNPk	2	3	1	G3V940	N-Term(TMT10); C8(Carbamidomethyl); K13(TMT10)	0	1.08295	2	3.70679	1.09062	2	7.10866	1.0282	2	0.886957	1.08653	2	1.90221	0.878107	2	6.3723	1.05239	2	1.12945	0.861649	2	4.45524	0.869011	2	3.25148	1.08511	2	0.136934	0	2.622e-10	84.72	8.07803e-08	2	1983.04	1.28963	83.3781	0
High	vVGAMQLYSVDR	2	2	1	F1M779	N-Term(TMT10)	0	1.06435	2	6.42012	1.07825	2	4.84691	0.961116	2	4.01593	1.03157	2	6.28281	0.982253	2	0.119803	1.01808	2	7.11147	0.931471	2	1.58571	0.97709	2	1.77774	1.00678	2	10.4465	0	2.068e-08	84.68	7.64216e-08	2	1566.85	1.20091	78.4531	0
High	aVDIPHMDIEALk	4	3	1	P62907	N-Term(TMT10); K13(TMT10)	0	0.941094	4	4.74846	0.983154	4	2.14878	1.00995	4	2.67316	1.07106	4	1.88443	0.999715	4	1.82608	1.04894	4	2.32847	0.927522	4	2.87752	0.95662	4	2.3598	1.05406	4	4.0534	0	6.545e-10	84.66	1.1576e-07	2	1910.09	1.96839	85.4361	0
High	sISGALASDLGk	11	1	1	P11883	N-Term(TMT10); K12(TMT10)	0	1.15115	11	8.44238	1.16307	11	5.64156	0.986984	11	6.83193	1.00043	11	2.29378	0.916245	11	4.3878	0.999086	11	9.52461	0.93043	11	6.3397	0.881551	11	5.56475	1.08855	11	5.62689	0	1.048e-08	84.65	1.11228e-07	2	1576.93	2.45972	79.8186	0
High	gLVVDMDGFEEER	3	1	1	P50475	N-Term(TMT10)	0	0.895501	3	8.1038	0.915192	3	0.801301	0.997212	3	6.81711	1.026	3	0.198776	1.03375	3	2.89719	1.03655	3	1.96645	1.02942	3	0.793852	1.05368	3	0.191571	0.970166	3	1.41007	0	4.767e-10	84.65	2.39937e-08	2	1724.84	1.1254	84.3736	0
High	mDIDVPDVDVQGPDWHLk	2	2	1	A0A0G2JUA5	N-Term(TMT10); K18(TMT10)	0	1.23019	2	8.77942	1.24685	2	0.645504	0.931823	2	0.269495	0.983511	2	1.10874	0.881331	2	2.82842	0.921676	2	3.61906	0.939676	2	1.19142	0.850328	2	5.25898	1.20748	2	3.94829	0	1.222e-11	84.64	7.95337e-08	3	2537.32	1.79823	87.7062	0
High	nIQEIcMSQTGWNR	2	1	1	P05370	N-Term(TMT10); C6(Carbamidomethyl)	0	0.908152	2	2.97777	0.876865	2	7.02482	1.11546	2	6.35992	1.05671	2	1.11133	1.03029	2	4.39834	1.00856	2	1.19005	1.09981	2	1.84092	0.998469	2	1.03238	0.821053	2	6.13243	0	2.256e-11	84.63	2.68593e-08	2	1965.95	1.43114	74.8133	0
High	sSALQWLTPEQTSGk	1	2	1	Q499P2	N-Term(TMT10); K15(TMT10)	0	1.02471	1		1.04001	1		0.994695	1		1.00937	1		1.06225	1		0.974396	1		1.03193	1		0.994484	1		0.902154	1		0	5.162e-10	84.63	1.14496e-07	2	2091.16	3.63067	83.9487	0
High	ikEDGDEEGEGEEAEDEEQR	1	2	1	A0A0G2K0J0	N-Term(TMT10); K2(TMT10)	0	1.26105	1		1.18977	1		0.90838	1		0.916189	1		0.945552	1		0.99193	1		0.90415	1		0.903153	1		1.16901	1		0	2.251e-16	84.59	1.05999e-08	3	2751.25	1.14552	51.4616	1
High	gADDAADADTAIINAEGGQNNSEEk	2	3	1	A0A0G2JUT1	N-Term(TMT10); K25(TMT10)	0	1.11539	2	11.9243	1.1743	2	2.75758	0.953197	2	8.97934	0.911419	2	8.99816	0.916578	2	1.23128	0.9544	2	1.84308	0.93252	2	0.58087	0.944167	2	2.00659	1.26126	2	7.39758	0	1.179e-13	84.59	3.54487e-08	3	2934.4	1.6068	68.588	0
High	lANIDEEMLQR	2	1	1	P40329	N-Term(TMT10)	0	0.911929	2	0.118081	0.908241	2	0.604251	1.02906	2	0.585118	1.06104	2	0.060172	1.00457	2	0.326938	1.05781	2	2.36988	1.04385	2	0.881709	1.07353	2	3.15174	0.846657	2	1.24434	0	3.545e-08	84.58	7.14091e-08	2	1560.83	1.47423	80.2434	0
High	dTTASAVAVGLk	2	1	1	Q64428	N-Term(TMT10); K12(TMT10)	0	0.978054	2	1.53783	0.909845	2	5.73419	1.05188	2	1.23951	1.08241	2	2.57909	1.05558	2	2.15824	0.97337	2	2.01055	0.988049	2	1.05973	1.01291	2	2.29603	0.919671	2	6.84407	0	9.018e-09	84.55	1.12241e-07	2	1590.95	2.19216	66.2487	0
High	aVAVVVDPIQSVk	3	1	1	Q4V8E2	N-Term(TMT10); K13(TMT10)	0	0.969257	3	1.09176	0.95216	3	2.77384	1.06045	3	3.10915	1.01753	3	2.16609	0.992479	3	0.272358	1.03547	3	2.02705	1.01956	3	2.27986	0.977274	3	2.25736	0.978822	3	18.2373	0	7.949e-10	84.54	4.44724e-08	2	1783.11	1.30482	81.8796	0
High	hVGMAVAGLLADAR	4	2	1	P18422	N-Term(TMT10)	0	0.914765	4	3.89171	1.02385	4	8.84251	0.987474	4	0.319014	0.989939	4	5.32832	1.07403	4	5.70934	1.00816	4	4.29796	1.03997	4	4.47283	1.05994	4	1.77886	0.906274	4	9.19488	0	1.855e-10	84.51	1.16111e-07	2	1609.91	2.00708	77.7632	0
High	dVVELTDDTFDk	2	2	1	Q63081	N-Term(TMT10); K12(TMT10)	0	1.32583	2	5.46124	1.28148	2	4.93835	0.870339	2	2.50957	0.873187	2	2.8262	0.906789	2	2.76438	0.885968	2	0.312889	0.893061	2	2.91251	0.916907	2	5.08208	1.33576	2	0.594125	0	5.85e-09	84.51	8.01804e-08	2	1854.98	1.92844	83.9453	0
High	tGQAAGFSYTDANk	2	2	1	D4A5L9	N-Term(TMT10); K14(TMT10)	0	0.948924	2	4.28658	0.940001	2	0.769104	1.10635	2	4.14176	1.08766	2	1.07653	0.992884	2	1.97885	1.02303	2	3.22113	1.00117	2	5.74653	0.931667	2	3.96062	0.909579	2	3.46638	0	2.797e-11	84.48	7.02209e-08	2	1888.98	1.26653	60.1231	0
High	tTDGVYEGVAIGGDR	2	4	1	A0A0G2K5E7	N-Term(TMT10)	0	1.06838	2	7.93395	0.991092	2	2.10128	1.01155	2	2.86665	0.93817	2	0.567785	1.07665	2	2.06915	0.896794	2	1.40911	1.12636	2	5.08491	1.03928	2	1.73368	0.917103	2	6.75563	0	1.49e-11	84.47	6.21655e-08	2	1738.88	1.64092	65.7535	0
High	sPFEVQVSPEAGAQk	2	2	1	A0A0H2UHR7	N-Term(TMT10); K15(TMT10)	0	1.04383	2	7.56356	1.04718	2	4.03008	0.952738	2	2.44861	0.97335	2	1.55383	0.966256	2	5.10483	1.03049	2	2.81219	0.979831	2	0.319485	0.932923	2	14.0135	1.15194	2	0.0743896	0	1.155e-09	84.46	1.10652e-07	2	2032.11	0.908226	73.3513	0
High	aGQAVDDFIEk	4	3	1	P85968	N-Term(TMT10); K11(TMT10)	0	0.862585	4	2.64424	0.910344	4	2.10882	1.02591	4	0.913683	1.06875	4	1.62853	0.999973	4	0.253875	1.06442	4	3.25284	1.02861	4	1.98838	1.00733	4	4.29281	0.913993	4	4.99089	0	9.1e-08	84.45	1.22931e-07	2	1650.91	1.81862	77.4259	0
High	eEQEYEEELEEEPGQGAk	3	4	1	D3ZDT1	N-Term(TMT10); K18(TMT10)	0	1.09212	3	6.84718	1.06471	3	0.424083	0.99444	3	1.31387	0.977048	3	0.30055	0.908045	3	3.00555	0.992437	3	1.71625	0.943645	3	4.32368	0.977604	3	3.71669	1.12017	3	2.97767	0	3.406e-12	84.45	2.54835e-08	2	2581.23	3.43394	69.3013	0
High	aHIVFDFHQAADGIQEQQR	2	1	1	D4AEP0	N-Term(TMT10)	0	0.960904	2	11.1465	0.915049	2	18.6752	1.00695	2	0.984814	0.994414	2	6.11216	1.04374	2	3.56504	1.01033	2	11.2335	1.0079	2	6.93439	1.04966	2	8.6582	0.998909	2	12.23	0	2.693e-10	84.41	7.02751e-08	4	2439.24	1.48155	72.0846	0
High	eVDEQMLAIQNk	2	1	1	Q4QQV0	N-Term(TMT10); K12(TMT10)	0	1.11437	2	4.82028	1.17151	2	6.3679	0.911877	2	2.0447	0.939042	2	0.403151	0.96607	2	9.34152	0.973457	2	5.67993	0.971906	2	2.77307	0.892142	2	6.34139	1.21904	2	1.94894	0	3.048e-09	84.4	1.09286e-07	2	1876.03	1.87457	74.9885	0
High	gDAGSADVQDLEk	2	4	1	A0A0G2QC06	N-Term(TMT10); K13(TMT10)	0	1.03604	2	6.28329	1.10292	2	11.771	0.987622	2	0.532653	0.972938	2	2.85673	0.944221	2	4.87298	0.968069	2	2.23627	0.992221	2	5.86004	0.95522	2	6.45983	1.1294	2	7.87128	0	6.207e-10	84.38	7.96987e-08	2	1762.93	2.08046	60.3083	0
High	lAQQQAALLMQQEER	3	1	1	D3ZMS1	N-Term(TMT10)	0	1.0386	3	5.4561	1.01493	3	0.955827	0.972572	3	0.603939	0.928804	3	1.16561	1.09544	3	1.35614	0.930686	3	0.246513	1.0749	3	0.482543	1.06461	3	4.86638	0.941908	3	0.569993	0	4.065e-12	84.31	1.0101e-07	2	1986.07	1.94122	75.881	0
High	gFESPSDNSSAMLLQWHEk	1	2	1	Q4KLF8	N-Term(TMT10); K19(TMT10)	0	1.02427	1		1.07074	1		0.950487	1		0.991642	1		0.959433	1		1.03463	1		0.947319	1		0.921582	1		1.1862	1		0	2.546e-12	84.31	5.80115e-08	3	2621.31	0.697277	83.2549	0
High	tVIIEQSWGSPk	5	1	1	P63039	N-Term(TMT10); K12(TMT10)	0	0.966316	5	3.31123	1.00739	5	0.644409	1.03818	5	2.1578	1.03263	5	0.855879	1.03805	5	3.93645	0.968922	5	2.77529	1.01247	5	3.84239	0.978739	5	0.939527	0.909323	5	8.81996	0	3.273e-08	84.27	1.22147e-07	2	1803.05	1.87252	77.5763	0
High	tIAMDGTEGLVR	4	2	1	G3V6D3	N-Term(TMT10)	0	0.958839	4	5.80205	0.901303	4	3.43971	1.06849	4	1.9097	0.974048	4	3.94793	1.04872	4	7.97818	1.0036	4	4.86142	1.1125	4	2.63901	1.04999	4	3.55001	0.868077	4	9.07927	0	1.815e-08	84.23	8.45762e-08	2	1491.81	1.11696	69.4774	0
High	aLALLEDEEQAVR	1	1	1	D3ZJ32	N-Term(TMT10)	0	1.08022	1		1.0752	1		0.944161	1		1.02905	1		0.926272	1		1.05275	1		0.956014	1		0.942914	1		1.05829	1		0	5.101e-10	84.21	8.93287e-08	2	1685.93	1.78541	87.3639	0
High	sADTQDVVEDSLR	1	2	1	Q52KK2	N-Term(TMT10)	0	1.13109	1		1.09021	1		0.981101	1		0.962193	1		0.990227	1		0.947296	1		0.991636	1		0.984727	1		1.02644	1		0	5.83e-10	84.18	5.11805e-08	2	1663.84	2.47792	63.7855	0
High	kDVVELTDDTFDk	4	2	1	Q63081	N-Term(TMT10); K1(TMT10); K13(TMT10)	0	1.27694	4	1.41309	1.29259	4	6.40111	0.898447	4	1.05078	0.917556	4	3.33159	0.899453	4	3.60196	0.911409	4	0.570004	0.847977	4	2.651	0.851682	4	1.5852	1.34364	4	2.97051	0	2.5e-10	84.18	1.1783e-07	2	2212.23	1.35584	81.1398	1
High	lTVTSLQETGLk	2	2	1	A0A0H2UHR7	N-Term(TMT10); K12(TMT10)	0	1.03027	2	10.1512	1.03707	2	0.761602	0.954702	2	0.896727	1.00774	2	1.72954	1.03351	2	2.35746	0.9995	2	3.69993	1.01385	2	2.9858	0.973428	2	1.94489	1.00258	2	2.42095	0	6.606e-09	84.16	1.32763e-07	2	1748.06	2.32112	82.0263	0
High	aILVDLEPGTMDSVR	3	4	2	P85108;P69897	N-Term(TMT10)	0																												0	1.029e-08	84.16	1.17223e-07	2	1845	2.87629	87.6186	0
High	iSNSASSSGTGAPMkPAVGPPQPSDQDTLVQR	1	1	1	Q62920	N-Term(TMT10); K15(TMT10)	0	0.992602	1		0.894801	1		0.978179	1		1.02259	1		1.05436	1		0.939417	1		1.12932	1		1.05193	1		0.959482	1		0	3.912e-16	84.13	8.78985e-08	4	3638.89	0.375924	67.8218	0
High	vSQDSLGSLAEENVQPLR	2	3	1	G3V8F8	N-Term(TMT10)	0	1.47726	2	1.89728	1.43557	2	7.27323	0.829038	2	2.90234	0.7999	2	4.59429	0.887661	2	2.25091	0.792559	2	3.92953	0.939453	2	2.8456	0.865928	2	4.64716	1.37421	2	7.34642	0	1.501e-13	84.11	9.06331e-08	2	2171.15	1.48441	81.6326	0
High	gVLETFSGTETNk	2	2	1	Q6P2A5	N-Term(TMT10); K13(TMT10)	0	1.00925	2	0.417852	1.00383	2	1.41157	0.977236	2	1.38308	0.995402	2	2.24899	1.02352	2	4.99205	1.02512	2	1.43307	0.969841	2	4.33107	0.964248	2	0.756949	1.07901	2	0.290799	0	2.581e-10	84.1	1.07376e-07	2	1841.01	1.3585	74.1933	0
High	dAEAGEAEEQPR	1	1	1	Q5U2Z4	N-Term(TMT10)	0	0.790027	1		0.677628	1		1.1324	1		1.37822	1		0.893154	1		1.30807	1		0.964964	1		0.778778	1		0.776913	1		0	2.842e-08	84.08	1.38749e-08	2	1530.73	1.7629	37.4403	0
High	dIISDTSGEFR	2	1	1	Q07936	N-Term(TMT10)	0	0.989321	2	0.875518	1.0137	2	7.45573	1.06815	2	2.95916	1.00724	2	3.27667	0.991118	2	1.43023	1.05961	2	1.51124	0.956384	2	3.54547	0.9492	2	8.54696	0.951548	2	1.81847	0	1.617e-07	84.07	4.54421e-08	2	1468.75	1.44915	70.7274	0
High	dTLDYSSNTMESALQYEk	3	2	2	G3V9K0;B2RYA5	N-Term(TMT10); K18(TMT10)	0																												0	3.787e-14	84.07	4.91636e-08	2	2553.25	1.08172	84.6276	0
High	lIEEQDNIIALk	2	2	1	Q63663	N-Term(TMT10); K12(TMT10)	0	1.16313	2	5.6009	1.19166	2	4.56441	0.984304	2	2.17445	1.04553	2	2.28164	0.86137	2	7.19046	1.05959	2	2.02765	0.804808	2	6.30948	0.825779	2	2.02713	1.16259	2	2.79436	0	1.434e-09	84.03	1.00225e-07	2	1857.11	-0.863388	87.2207	0
High	tLASAGGPDNLVLLDPGk	1	3	1	A0A0G2JSM7	N-Term(TMT10); K18(TMT10)	0	0.928216	1		1.01151	1		0.971208	1		1.1138	1		1.04111	1		0.999874	1		0.953128	1		1.03158	1		0.941263	1		0	1.092e-11	84.03	1.19796e-07	2	2196.27	1.9364	86.312	0
High	qLEEAEEEAQR	3	2	1	G3V6P7	N-Term(TMT10)	0	0.920067	3	12.0167	0.901253	3	11.6423	1.07888	3	6.72655	0.93694	3	0.738345	1.12723	3	8.74252	0.916775	3	6.60943	1.12931	3	3.91634	1.069	3	3.12991	0.85729	3	32.7248	0	1.133e-08	84	3.62278e-08	2	1560.77	1.06163	56.301	0
High	sGNIVAGIANESk	1	3	1	Q4V7C6	N-Term(TMT10); K13(TMT10)	0	1.01033	1		1.05862	1		0.948883	1		0.992191	1		1.01709	1		0.988346	1		1.02553	1		1.02943	1		0.990407	1		0	3.049e-10	84	1.2839e-07	2	1717.99	2.11741	68.3102	0
High	gTSFEAAAASGGSASSEk	3	1	1	P13803	N-Term(TMT10); K18(TMT10)	0	0.914664	3	2.93919	0.927228	3	5.01789	1.06886	3	4.41907	1.05096	3	0.535378	1.0101	3	1.96636	1.03825	3	1.52666	1.00414	3	0.285668	1.00729	3	0.566595	1.00045	3	2.94353	0	1.354e-14	84	6.6683e-08	2	2073.05	1.98331	58.1123	0
High	iINEPTAAAIAYGLDkR	1	1	1	P06761	N-Term(TMT10); K16(TMT10)	0	1.10861	1		1.07781	1		0.999196	1		1.04789	1		0.917732	1		1.0378	1		0.909882	1		0.911586	1		1.04299	1		0	1.193e-09	83.98	1.03786e-07	3	2274.33	1.35259	85.1226	1
High	hELQANcYEEVk	4	1	1	P45592	N-Term(TMT10); C7(Carbamidomethyl); K12(TMT10)	0	1.06415	4	1.30421	0.942554	4	6.93267	1.08513	4	1.71481	0.96711	4	2.23433	0.980118	4	3.15236	0.966425	4	1.92008	1.00211	4	2.67926	0.996715	4	3.24599	0.99161	4	2.82765	0	1.62e-10	83.96	7.25232e-08	2	1978.01	0.959246	58.9307	0
High	lScFAQSVSPAEk	4	2	2	P85845;A0A0G2KAM4	N-Term(TMT10); C3(Carbamidomethyl); K13(TMT10)	0																												0	2.841e-09	83.92	1.16989e-07	2	1882.02	1.71544	76.7477	0
High	mAPYQGPDAAPGALDYk	3	4	1	Q9QXQ0	N-Term(TMT10); M1(Oxidation); K17(TMT10)	0	0.900096	3	4.8419	0.941492	3	4.97987	0.931312	3	2.43538	0.953839	3	0.556323	1.08979	3	3.07687	0.985305	3	1.87381	1.11181	3	0.836294	1.18719	3	3.78964	0.898644	3	0.295918	0	6.162e-11	83.92	7.96824e-08	2	2239.15	0.440577	69.4609	0
High	vQANLDTPDINIQGPEAk	6	2	1	A0A0G2JUA5	N-Term(TMT10); K18(TMT10)	0	1.14672	6	4.82212	1.18593	6	5.93451	0.912919	6	2.95692	0.954581	6	4.05066	0.931697	6	4.67383	0.969287	6	3.57157	0.951458	6	3.18683	0.938866	6	1.58158	1.18416	6	6.6513	0	2.986e-13	83.88	1.36488e-07	2	2381.32	3.85788	78.2826	0
High	qAEAMALLAEAER	2	1	1	P54921	N-Term(TMT10)	0	1.01603	2	0.501029	1.06966	2	1.03639	0.995988	2	8.14309	0.964297	2	3.84132	1.01487	2	1.19051	0.982718	2	3.83124	1.0293	2	3.19005	1.03147	2	4.30372	0.939531	2	14.2443	0	5.245e-10	83.84	7.99247e-08	2	1631.87	1.99585	85.3955	0
High	eAGDVcYADVQk	1	1	1	Q5PPI1	N-Term(TMT10); C6(Carbamidomethyl); K12(TMT10)	0	0.966778	1		0.967767	1		1.03227	1		1.09913	1		0.867521	1		1.1053	1		0.970902	1		0.990179	1		0.954026	1		0	1.68e-09	83.84	7.39355e-08	2	1812.92	1.57977	60.4457	0
High	mAGNEYVGFSNATFQSER	1	3	2	P13264;A0A0G2KAN7	N-Term(TMT10)	0																												0	3.92e-13	83.84	2.23046e-08	2	2237.05	1.56135	77.7516	0
High	fDHIMYTGSTAVGk	16	1	1	P11883	N-Term(TMT10); K14(TMT10)	0	1.24437	16	11.2904	1.20161	16	3.75468	0.839559	16	4.5489	1.04076	16	2.23178	0.807952	16	5.75756	1.09993	16	3.93371	0.739339	16	9.58662	0.779092	16	9.98708	1.4195	16	7.16214	0	4.567e-11	83.82	9.21198e-08	2	1985.06	0.724295	71.0483	0
High	mLDYLQGSGETPQTDIR	4	1	1	D3ZAN3	N-Term(TMT10)	0	0.978471	4	17.8626	0.931046	4	7.58031	0.995091	4	3.94439	1.01668	4	3.78298	0.977633	4	9.40321	1.06511	4	4.9528	0.99751	4	8.22154	0.985297	4	3.66833	1.0028	4	18.5833	0	3.578e-11	83.82	6.20356e-08	2	2153.08	1.16704	83.6682	0
High	vDINTEDLEDGTcR	2	1	1	C0JPT7	N-Term(TMT10); C13(Carbamidomethyl)	0	1.00665	2	16.1881	0.965284	2	7.69391	1.02089	2	1.102	1.04135	2	2.73009	1.00564	2	13.0122	1.00694	2	3.81821	0.995024	2	12.9157	0.981593	2	9.71967	0.96455	2	7.97287	0	8.448e-11	83.81	1.70523e-08	2	1865.88	0.920325	68.9186	0
High	dcDLQEDAcYNcGR	4	1	1	P62634	N-Term(TMT10); C2(Carbamidomethyl); C9(Carbamidomethyl); C12(Carbamidomethyl)	0	1.26313	4	10.3225	1.13356	4	11.7603	0.915224	4	10.1302	0.925893	4	5.38041	0.852907	4	14.6899	0.981762	4	2.07566	0.87361	4	10.2643	0.796196	4	7.86335	1.26236	4	2.95035	0	1.593e-10	83.8	4.15882e-09	2	2004.81	1.55308	54.8719	0
High	dTNGSQFFITTVk	2	1	1	P24368	N-Term(TMT10); K13(TMT10)	0	0.977919	2	3.29656	1.0145	2	6.77625	0.982924	2	12.4902	0.914848	2	5.79236	1.10496	2	13.3346	0.980405	2	14.0348	1.04975	2	6.8869	1.05923	2	10.0863	0.946042	2	4.45305	0	1.324e-10	83.79	1.36422e-07	2	1916.06	1.73101	81.5026	0
High	hLLGVEDLLQk	3	4	1	A0A0G2JZY6	N-Term(TMT10); K11(TMT10)	0	1.04281	3	1.84406	1.01093	3	4.49975	1.01129	3	1.07804	0.970793	3	3.12722	1.0298	3	0.924782	0.951462	3	4.37451	0.965422	3	2.11501	1.02428	3	3.16385	1.08124	3	1.42295	0	1.592e-08	83.78	1.03861e-07	2	1723.05	1.51223	84.2166	0
High	sYELPDGQVITIGNER	15	11	4	P60711;P68035;P68136;D3ZRN3	N-Term(TMT10)	0																												0	1.18e-10	83.77	1.01792e-07	2	2020.06	1.90099	85.3343	0
High	aEDGSVIDYELIDQDAR	7	1	1	Q07936	N-Term(TMT10)	0	1.02711	7	6.06259	1.06535	7	1.16478	0.99843	7	6.98539	1.03412	7	2.45116	0.944932	7	5.05382	1.0485	7	1.73498	0.934687	7	8.22739	0.909602	7	6.23831	1.17079	7	6.2972	0	6.284e-10	83.76	4.14416e-08	3	2138.05	1.15913	82.1971	0
High	yASIcQQNGIVPIVEPEILPDGDHDLk	1	4	1	P05065	N-Term(TMT10); C5(Carbamidomethyl); K27(TMT10)	0	0.974917	1		0.812416	1		0.972649	1		0.992036	1		1.08624	1		0.994953	1		1.0817	1		1.12396	1		0.959901	1		0	4.925e-15	83.76	1.22011e-07	3	3478.83	0.163811	87.913	0
High	lIEAEDNMNcQMSNITVTYR	2	1	1	M0R907	N-Term(TMT10); C10(Carbamidomethyl)	0	0.966831	2	2.22968	1.03836	2	4.84396	0.939016	2	4.39908	1.05289	2	0.137032	0.935583	2	7.53925	1.09589	2	1.1577	0.911043	2	10.8505	0.973577	2	10.5276	1.10868	2	2.36728	0	6.422e-15	83.75	2.25608e-08	2	2631.24	0.0834273	85.9221	0
High	nVEGQDMLYQSLk	3	2	1	P62944	N-Term(TMT10); K13(TMT10)	0	1.01283	3	0.325705	1.03781	3	10.0061	0.981812	3	1.11829	0.961212	3	0.272692	1.05361	3	4.26044	0.974364	3	1.19878	1.00795	3	3.46415	1.01066	3	8.77985	0.957908	3	5.70073	0	2.951e-10	83.74	1.17079e-07	2	1983.07	2.39368	79.8335	0
High	lGGSAVISLEGkPL	7	1	1	P45592	N-Term(TMT10); K12(TMT10)	0	1.04451	7	6.43673	1.05571	7	9.38601	0.967606	7	1.8677	1.00509	7	1.78834	1.01745	7	2.34832	0.990667	7	6.04926	1.02744	7	5.10369	0.971511	7	5.49073	0.954399	7	3.67539	0	3.29e-09	83.73	8.74823e-08	2	1799.11	2.14917	87.7698	0
High	sATLASIDAELQk	3	1	1	Q2PQA9	N-Term(TMT10); K13(TMT10)	0	1.0606	3	2.23698	1.05018	3	4.05861	0.984637	3	3.61461	0.978284	3	1.89025	0.995132	3	0.79681	0.958228	3	1.6994	1.00293	3	3.82445	0.981595	3	4.11826	1.05688	3	2.06549	0	2.069e-10	83.71	1.44703e-07	2	1805.04	0.431557	83.555	0
High	dEILPTTPISEQk	4	3	1	P62909	N-Term(TMT10); K13(TMT10)	0	0.95886	4	3.4261	1.04262	4	2.55211	0.992894	4	7.19629	1.03167	4	2.97963	0.972019	4	7.54735	1.10795	4	2.62115	0.925834	4	3.78404	0.900812	4	3.51663	1.00335	4	3.73915	0	7.981e-10	83.68	1.19565e-07	2	1929.1	0.561586	75.4151	0
High	aIYDTPcIQAESDk	1	1	1	Q5XIC6	N-Term(TMT10); C7(Carbamidomethyl); K14(TMT10)	0	1.04543	1		0.99366	1		1.00116	1		1.06361	1		0.914065	1		1.09232	1		0.870187	1		0.917669	1		1.12377	1		0	6.097e-11	83.65	8.63038e-08	2	2069.07	1.98577	69.2923	0
High	gIGTDSAEFAELk	2	3	1	A0A0G2K681	N-Term(TMT10); K13(TMT10)	0	0.965975	2	2.88613	1.03752	2	6.08703	0.991832	2	2.56527	0.991875	2	1.45703	0.972403	2	7.09766	1.02144	2	1.15022	0.988972	2	1.72292	0.999532	2	5.10744	1.06944	2	0.754791	0	5.76e-11	83.63	1.11629e-07	2	1795.98	-0.325795	80.943	0
High	gDRcEDMSVNQDLADTDAR	2	1	1	P07150	N-Term(TMT10); C4(Carbamidomethyl)	0	1.16114	2	10.1369	1.32678	2	9.26557	0.962703	2	9.62149	0.883307	2	1.05535	0.884606	2	1.69678	0.928266	2	10.9858	0.891511	2	4.9179	0.918436	2	1.50523	1.24623	2	7.71239	0	7.04e-13	83.59	6.56283e-09	3	2397.06	0.0805335	56.251	1
High	hQAFEAELHANADR	7	6	1	Q6IRK8	N-Term(TMT10)	0	0.959049	7	8.49998	0.953837	7	14.9354	1.02344	7	9.59766	0.947554	7	12.2372	1.07102	7	11.1582	0.890711	7	8.98919	1.09241	7	13.402	1.10829	7	6.45222	0.951215	7	9.26888	0	4.856e-11	83.58	6.33677e-08	2	1837.92	1.33431	52.4278	0
High	vLAVNQENEQLMEDYEk	4	3	1	Q6GMN8	N-Term(TMT10); K17(TMT10)	0	1.02674	4	4.30297	1.00092	4	3.93332	0.972005	4	1.00775	1.02236	4	2.64054	1.02227	4	1.53332	1.01822	4	1.63643	0.954573	4	6.03427	0.984966	4	2.49773	1.02259	4	5.00942	0	5.288e-10	83.56	1.04852e-07	3	2510.29	1.74302	84.6921	0
High	tTIVIccSPSSYNESETk	3	1	1	Q2PQA9	N-Term(TMT10); C6(Carbamidomethyl); C7(Carbamidomethyl); K18(TMT10)	0	1.05925	3	2.43156	1.03941	3	3.45796	0.960066	3	4.04193	0.988	3	0.0992438	0.906126	3	1.415	1.0243	3	1.56099	0.947627	3	0.915187	1.01453	3	0.300234	1.11699	3	1.71019	0	4.303e-11	83.52	6.51385e-08	2	2534.26	2.05361	70.2872	0
High	gDLVGGLDIVk	2	2	1	Q9JLZ1	N-Term(TMT10); K11(TMT10)	0	0.962551	2	2.84669	0.995478	2	0.920102	1.02054	2	1.28913	1.00049	2	1.13034	1.01264	2	5.55368	1.01234	2	4.45488	1.03991	2	2.89386	0.998523	2	1.25619	0.965684	2	3.34392	0	8.29e-08	83.48	1.16449e-07	2	1543.95	1.46021	85.7502	0
High	lLEAQIATGGIIDPEESHR	4	12	1	Q6S3A0	N-Term(TMT10)	0	0.979874	4	2.71859	0.985896	4	2.91747	1.02644	4	1.70235	0.995438	4	1.92803	0.998975	4	2.68387	1.03294	4	1.47846	1.00853	4	6.078	1.00097	4	13.096	1.0415	4	6.44243	0	3.002e-11	83.45	1.50242e-07	3	2278.22	0.353522	82.7528	0
High	iGSLIDVNQSk	1	2	1	Q27W02	N-Term(TMT10); K11(TMT10)	0	0.996916	1		0.98501	1		0.964991	1		0.98904	1		0.991329	1		1.02579	1		1.04301	1		1.07128	1		0.959701	1		0	2.467e-08	83.41	1.45476e-07	2	1631.98	1.88156	81.1547	0
High	hPHDIIDDINSGAVEcPAS	6	1	1	P23358	N-Term(TMT10); C16(Carbamidomethyl)	0	0.979915	6	3.75674	0.8876	6	6.22742	1.04313	6	6.07564	1.00378	6	3.23427	1.03711	6	3.69671	0.97074	6	1.90278	1.03969	6	4.30209	1.07728	6	1.09099	0.964895	6	9.33644	0	3.148e-09	83.41	3.46588e-08	2	2276.08	1.29738	68.988	0
High	tAVVVGTITDDVR	9	3	1	P12001	N-Term(TMT10)	0	0.906692	9	4.1381	0.904658	9	4.38882	1.06675	9	2.20082	0.977646	9	3.16764	1.09724	9	7.27796	0.975359	9	4.49494	1.13668	9	4.51865	1.09446	9	3.07463	0.825387	9	12.9067	0	2.029e-09	83.4	1.54039e-07	2	1574.9	2.4129	75.6449	0
High	lPQDQPTNVETSAQAAAGGSLk	2	1	1	F1LUD3	N-Term(TMT10); K22(TMT10)	0	0.960523	2	4.04559	1.0043	2	1.43475	0.950153	2	6.06482	0.985075	2	12.7275	0.974892	2	1.45442	1.04152	2	8.26348	1.00716	2	3.38422	1.02366	2	9.6823	1.08722	2	5.21252	0	7.962e-11	83.4	1.28899e-07	3	2641.42	0.877555	73.047	0
High	eEAPDILcLQETk	2	2	1	Q99PF3	N-Term(TMT10); C8(Carbamidomethyl); K13(TMT10)	0	0.942103	2	0.133048	0.977542	2	4.60984	1.02434	2	1.29961	1.05678	2	2.18144	0.97006	2	5.29364	1.12772	2	4.51778	0.896312	2	2.26385	0.946518	2	7.66723	1.02431	2	0.363592	0	2.558e-10	83.35	1.18601e-07	2	2004.07	1.21622	81.2263	0
High	qVLALQSQLADTk	2	2	1	G3V9Y1	N-Term(TMT10); K13(TMT10)	0	1.04812	2	0.333075	1.04427	2	0.468557	0.976302	2	0.368812	0.989151	2	2.95943	0.995063	2	2.4915	0.974679	2	0.349217	1.02547	2	1.5472	1.00107	2	1.50179	1.01175	2	2.4576	0	2.956e-10	83.34	1.31155e-07	2	1873.12	2.12231	78.3522	0
High	gIMGEDSYPYIGk	1	3	1	A0A0H2UHL6	N-Term(TMT10); K13(TMT10)	0	1.02598	1		1.08973	1		0.929909	1		1.02101	1		0.923263	1		1.09635	1		0.861794	1		0.940393	1		1.18302	1		0	4.309e-10	83.34	9.03721e-08	2	1888	3.04311	82.4546	0
High	vDINAPDVDVQGPDWHLk	7	5	1	A0A0G2JUA5	N-Term(TMT10); K18(TMT10)	0	1.23989	7	9.38822	1.25629	7	4.32027	0.914725	7	4.37231	0.944462	7	2.09967	0.891897	7	4.72434	0.916076	7	3.97384	0.888843	7	5.598	0.877856	7	2.69071	1.25695	7	1.96663	0	2.111e-10	83.34	1.46681e-07	3	2476.33	1.65918	84.6094	0
High	mLAPEGALNIHEk	3	2	1	P16446	N-Term(TMT10); K13(TMT10)	0	1.03911	3	6.61423	1.06784	3	1.49451	1.01702	3	1.23292	0.97597	3	4.23763	0.983214	3	3.83476	0.975373	3	0.198529	0.948973	3	1.4941	0.987868	3	4.77388	1.05862	3	8.0845	0	3.623e-10	83.32	1.53178e-07	2	1881.07	1.57704	70.3753	0
High	dIIAcGFDVNk	2	3	1	F8WFH8	N-Term(TMT10); C5(Carbamidomethyl); K11(TMT10)	0	0.705037	2	0.29431	0.744135	2	2.1277	1.24225	2	2.29	1.29726	2	0.619725	0.846041	2	0.26893	1.30612	2	0.30117	0.889851	2	0.186824	0.877376	2	4.16722	0.774722	2	1.7736	0	5.537e-08	83.31	1.21565e-07	2	1709.93	2.21645	81.1933	0
High	vLGATLSPELIQk	3	1	1	F1M9V7	N-Term(TMT10); K13(TMT10)	0	0.966656	3	2.28455	1.08861	3	3.33109	0.967212	3	2.80721	1.00345	3	1.41908	1.00042	3	9.50752	1.01839	3	8.15281	1.04333	3	0.371568	0.979403	3	3.95682	1.02964	3	1.1031	0	5.772e-08	83.27	7.72403e-08	2	1827.14	1.49302	87.3661	0
High	sYDVPPPPMEPDHPFYSNISk	7	1	1	P25113	N-Term(TMT10); K21(TMT10)	0	1.02532	7	6.32448	1.01886	7	2.7917	0.882123	7	2.63429	1.11215	7	4.41718	0.842566	7	6.22988	1.22419	7	3.69553	0.781031	7	12.6136	0.861757	7	6.38806	1.27189	7	3.34758	0	9.094e-12	83.27	8.78373e-08	3	2875.44	1.12604	81.0191	0
High	eAAGTTAAAGTGGTTEQPPR	1	1	1	Q5XIW8	N-Term(TMT10)	0	0.834332	1		1.12361	1		0.872079	1		1.08844	1		0.954592	1		1.06912	1		0.941435	1		0.983431	1		1.17877	1		0	7.014e-12	83.25	6.67143e-08	3	2073.04	0.0378901	42.5642	0
High	iVSNAScTTNcLAPLAk	5	7	2	P04797;M0R660	N-Term(TMT10); C7(Carbamidomethyl); C11(Carbamidomethyl); K17(TMT10)	0																												0	1.625e-10	83.25	1.62764e-07	3	2278.24	2.43413	77.388	0
High	sVQTTLQTDEVk	2	2	2	B1WBY7;B5DEH2	N-Term(TMT10); K12(TMT10)	0																												0	2.745e-09	83.24	1.56026e-07	2	1807.02	1.4433	61.8412	0
High	vDVDVPDVDVQGPDWHLk	5	2	1	A0A0G2JUA5	N-Term(TMT10); K18(TMT10)	0	1.18576	5	4.46644	1.26813	5	1.99515	0.950826	5	2.92948	0.976557	5	1.81645	0.917517	5	5.52247	0.945015	5	1.98164	0.85932	5	7.76564	0.885231	5	0.379214	1.20946	5	9.70729	0	3.262e-12	83.24	1.32076e-07	2	2491.33	1.02758	86.3224	0
High	tTcScSLAVQLSk	1	2	1	Q4G022	N-Term(TMT10); C3(Carbamidomethyl); C5(Carbamidomethyl); K13(TMT10)	0	0.946444	1		0.997679	1		1.0479	1		0.964009	1		1.02503	1		0.959698	1		1.093	1		1.05938	1		0.921323	1		0	1.115e-10	83.22	1.15535e-07	2	1913.03	2.50738	70.2293	0
High	iIYGGSVTGATck	4	3	1	P48500	N-Term(TMT10); C12(Carbamidomethyl); K13(TMT10)	0	0.998662	4	7.47878	0.965235	4	2.21285	0.987959	4	2.23418	1.10604	4	2.37607	0.968461	4	4.08893	1.04697	4	6.95959	0.920803	4	4.46392	0.974772	4	2.44447	1.00342	4	5.21434	0	3.942e-10	83.21	1.21531e-07	2	1785	0.937904	69.9466	0
High	aASAYAVGDVk	1	2	1	P12368	N-Term(TMT10); K11(TMT10)	0	1.13558	1		1.08668	1		0.951278	1		0.96991	1		0.928759	1		1.04604	1		0.900487	1		0.968405	1		1.1125	1		0	3.253e-08	83.19	1.35525e-07	2	1509.87	1.91259	60.5846	0
High	hYQQLLQSLEQGEQEESR	4	13	1	Q6S3A0	N-Term(TMT10)	0	0.972259	4	1.10667	0.936395	4	4.86929	0.984673	4	4.67115	0.970477	4	2.30897	0.967003	4	3.13763	0.954836	4	4.84802	1.02222	4	6.11768	1.08206	4	8.9851	1.03852	4	11.9954	0	4.862e-12	83.19	7.07607e-08	2	2431.21	1.39042	80.2801	0
High	aLQSGQcAGAALDVFTEEPPRDR	4	1	1	O08651	N-Term(TMT10); C7(Carbamidomethyl)	0	0.992224	4	27.5887	1.02399	4	22.6221	0.977501	4	10.4137	1.0319	4	5.55308	0.909111	4	15.2219	1.10102	4	2.4103	0.876063	4	19.1792	0.926928	4	18.941	1.12849	4	25.8148	0	3.761e-13	83.17	7.71116e-08	3	2717.35	0.411424	77.5102	1
High	lAEDAPNFDGPAAEGQPGQk	4	1	1	F1LN59	N-Term(TMT10); K20(TMT10)	0	0.901811	4	4.86071	0.894058	4	2.26127	1.04988	4	3.99885	1.0296	4	4.00345	1.02303	4	2.34367	1.08358	4	1.71602	0.980314	4	2.53537	1.00576	4	2.31349	0.943981	4	2.03853	0	2.07e-11	83.15	1.03613e-07	3	2470.26	0.821231	70.7158	0
High	lQLcYQLSTVGk	2	3	1	B5DFK1	N-Term(TMT10); C4(Carbamidomethyl); K12(TMT10)	0	1.17855	2	7.16914	1.23768	2	3.02237	0.952024	2	1.39656	1.06232	2	1.32775	0.781218	2	2.45798	1.08559	2	0.750611	0.759151	2	0.510742	0.818559	2	7.37454	1.2467	2	2.80975	0	9.221e-10	83.11	1.33646e-07	2	1868.07	1.74372	85.0559	0
High	tHLPGFVEQAGALk	4	2	1	A0A0G2JSS8	N-Term(TMT10); K14(TMT10)	0	0.846786	4	9.85844	0.814289	4	12.7681	1.14584	4	2.18294	1.07758	4	4.53071	1.01596	4	4.56838	1.05732	4	5.98401	1.06082	4	3.62709	1.03126	4	2.98917	0.796602	4	3.00429	0	2.176e-11	83.11	1.22896e-07	2	1926.12	1.52632	75.1209	0
High	rEELSNVLAAMR	2	6	1	A0A140TAI6	N-Term(TMT10)	0	0.968686	2	0.402814	0.894724	2	2.76254	1.02835	2	2.40438	1.00794	2	5.75238	1.10034	2	4.33478	0.983772	2	1.17097	1.03688	2	1.83072	1.06325	2	4.88132	0.90037	2	0.947346	0	4.41e-10	83.06	1.23083e-07	3	1617.9	1.90545	78.5089	1
High	gVVDSEDIPLNLSR	12	4	3	Q5XHZ0;P34058;P82995	N-Term(TMT10)	0																												0	7.76e-10	82.99	1.31614e-07	2	1742.95	2.65146	80.8437	0
High	aLQPLEEGESEEk	2	2	1	Q62667	N-Term(TMT10); K13(TMT10)	0	0.706878	2	10.3256	0.709035	2	4.85246	1.12169	2	6.98102	1.12297	2	12.6858	1.1088	2	17.0274	1.12862	2	6.82981	1.07869	2	15.1216	1.09169	2	12.8014	0.684743	2	5.62267	0	5.357e-10	82.98	1.23609e-07	2	1917.03	1.84184	65.4899	0
High	iNTESSLWSLEPGk	1	1	1	Q32PY7	N-Term(TMT10); K14(TMT10)	0	0.968938	1		0.972645	1		1.01104	1		1.03105	1		0.985789	1		1.02084	1		0.984505	1		1.06022	1		0.964706	1		0	5.78e-11	82.97	1.51398e-07	2	2019.12	1.46846	86.1995	0
High	gDQcQLVGPAQPFHWk	2	13	1	Q6S3A0	N-Term(TMT10); C4(Carbamidomethyl); K16(TMT10)	0	1.03307	2	0.0252437	1.13068	2	5.44098	0.981643	2	2.64957	1.03045	2	0.000724112	0.926689	2	3.22081	1.03172	2	1.00985	0.891934	2	3.79137	0.9272	2	2.16775	1.11473	2	1.41286	0	6.21e-11	82.96	1.36573e-07	3	2326.22	2.02491	77.9799	0
High	fEcGEGEQVAEAE	1	1	1	Q9QYU2	N-Term(TMT10); C3(Carbamidomethyl)	0	0.987319	1		1.01449	1		0.998633	1		1.00461	1		1.00114	1		0.984762	1		1.02813	1		1.00901	1		1.00899	1		0	5.763e-07	82.94	5.33567e-09	2	1683.74	1.788	65.9611	0
High	tQMLDQEELLASTR	2	1	1	Q2PQA9	N-Term(TMT10)	0	0.991463	2	4.13651	0.934306	2	0.693983	1.0203	2	2.75031	0.954563	2	5.32024	1.10437	2	3.14031	0.92289	2	2.49391	1.13707	2	2.13395	1.05245	2	2.71115	0.910698	2	1.49478	0	5.977e-11	82.93	1.22749e-07	2	1863.97	1.96902	77.8475	0
High	aAPPPGQSQAQGQGQPVPTAPAR	3	1	1	Q5U3Y2	N-Term(TMT10)	0	1.11043	3	2.45038	1.03003	3	20.5699	0.96899	3	11.3839	0.871787	3	19.3218	1.02001	3	2.91367	0.963665	3	7.20737	1.03225	3	5.25238	1.07347	3	4.58572	1.0756	3	0.195474	0	1.503e-10	82.91	1.44038e-07	3	2440.29	1.73875	48.7454	0
High	gSDcGIVNVNIPTSGAEIGGAFGGEk	1	1	1	Q64057	N-Term(TMT10); C4(Carbamidomethyl); K26(TMT10)	0	1.13418	1		1.14209	1		0.977209	1		0.947497	1		0.881613	1		1.00759	1		0.962103	1		0.912506	1		1.1608	1		0	1.709e-13	82.9	1.21548e-07	3	2964.52	1.26934	86.1863	0
High	gGSISVQVNSVk	2	1	1	P41777	N-Term(TMT10); K12(TMT10)	0	0.876103	2	0.306644	0.87806	2	7.99581	0.988155	2	2.45162	1.05731	2	4.61242	1.02913	2	2.86956	1.09055	2	2.63116	1.04914	2	3.9241	1.04139	2	0.472681	0.929739	2	2.90035	0	1.884e-09	82.87	1.72999e-07	2	1632.97	1.72433	65.2157	0
High	nLNQALLDLHALGSAR	3	6	1	P02793	N-Term(TMT10)	0	0.826613	3	11.4354	0.751648	3	25.6255	0.962849	3	0.403927	1.00105	3	3.65864	1.09413	3	8.20455	1.07548	3	1.56326	1.30404	3	3.42552	1.12022	3	1.89908	0.733193	3	14.6327	0	1.495e-10	82.87	1.89783e-07	3	1935.1	1.50463	87.6589	0
High	aLDVGATEcINPR	3	2	1	G3V7J9	N-Term(TMT10); C9(Carbamidomethyl)	0	0.884167	3	0.349594	0.871484	3	1.37348	1.085	3	1.71609	1.11815	3	1.61022	0.975878	3	2.8281	1.10365	3	1.55116	1.00972	3	1.79491	0.970604	3	3.753	0.872241	3	7.58211	0	1.456e-09	82.85	7.21132e-08	2	1644.86	2.1317	66.4354	0
High	tAVDSLVAYSVk	2	1	1	D3ZH41	N-Term(TMT10); K12(TMT10)	0	1.12981	2	0.484662	1.14119	2	2.64229	0.942523	2	2.15668	1.00191	2	0.960323	0.940522	2	0.049798	0.978946	2	0.457229	0.991348	2	0.929715	0.933449	2	3.2095	1.04991	2	2.88435	0	3.553e-09	82.85	1.40854e-07	2	1711.01	2.03548	84.8458	0
High	aDALQAGASQFETSAAk	4	4	1	P63025	N-Term(TMT10); K17(TMT10)	0	1.07348	4	0.474538	1.00137	4	2.41776	0.941515	4	2.52036	0.981779	4	2.75193	0.99826	4	1.61012	1.02714	4	1.3006	1.00101	4	3.834	0.990124	4	4.81079	1.06492	4	0.218302	0	1.683e-13	82.85	1.37223e-07	2	2124.14	1.394	75.6361	0
High	tNEQIHQLVAAYk	5	2	1	Q6IMZ3	N-Term(TMT10); K13(TMT10)	0	1.09738	5	4.382	1.1568	5	3.87129	0.905373	5	3.50878	0.939368	5	5.48791	0.936527	5	3.5466	0.959713	5	3.65294	0.939133	5	3.67932	0.945621	5	3.88452	1.27913	5	2.1828	0	8.89e-11	82.83	1.5714e-07	2	1973.12	0.763994	73.0406	0
High	vIDFDENTALDDTEEESFR	1	1	1	Q62703	N-Term(TMT10)	0	0.914903	1		0.968365	1		1.09021	1		1.05989	1		0.938468	1		1.05349	1		0.983524	1		0.988285	1		0.954288	1		0	9.767e-13	82.79	2.68269e-08	2	2474.14	1.2761	87.6748	0
High	aPLNVQFSSPVPGEAVk	2	2	1	D4A8D5	N-Term(TMT10); K17(TMT10)	0	0.895106	2	2.91137	0.967168	2	5.86564	1.01873	2	1.7168	1.059	2	3.3599	0.950856	2	4.45353	1.13135	2	5.32121	0.962274	2	0.913164	0.972193	2	1.32664	0.993166	2	4.4245	0	2.984e-11	82.78	1.30226e-07	2	2198.26	0.544942	82.3492	0
High	qITSYGETcPGLEQYAIk	2	1	1	D4ACB8	N-Term(TMT10); C9(Carbamidomethyl); K18(TMT10)	0	1.00531	2	6.80637	0.972649	2	0.520491	0.979992	2	0.84959	1.08237	2	4.45443	0.91827	2	3.00456	1.10481	2	5.02159	0.911674	2	2.85324	0.950447	2	8.37738	1.06975	2	0.171012	0	1.932e-11	82.78	1.2838e-07	2	2516.31	0.613659	81.4232	0
High	nQEDSEVAPScVGDmADNPR	1	2	2	F1LN75;B2GVB4	N-Term(TMT10); C11(Carbamidomethyl); M15(Oxidation)	0																												0	8.71e-11	82.77	6.86979e-09	3	2436.06	1.79521	51.3038	0
High	vTVGDITcTGEGTSk	1	2	1	G3V7J2	N-Term(TMT10); C8(Carbamidomethyl); K15(TMT10)	0	1.09454	1		1.07201	1		0.990897	1		1.01772	1		0.969543	1		1.00953	1		0.973996	1		0.954144	1		0.972084	1		0	5.116e-12	82.75	1.32987e-07	2	1983.05	-0.0750217	66.8026	0
High	sTLPVDEGSPLEk	2	2	2	A0A0G2JW88;Q5M7W5	N-Term(TMT10); K13(TMT10)	0																												0	4.282e-10	82.74	1.42605e-07	2	1830.03	2.15384	70.2563	0
High	vPENTMQAMQQk	2	3	1	Q6GMN8	N-Term(TMT10); K12(TMT10)	0	0.999454	2	5.69628	1.01781	2	5.72485	0.99038	2	1.14826	1.04762	2	1.88655	0.966342	2	4.24221	1.04051	2	7.32682	0.939476	2	12.1947	0.915546	2	7.47221	1.10778	2	10.0189	0	1.529e-09	82.74	1.11211e-07	2	1862.99	1.5343	65.6899	0
High	vNNININQGSITFAGGPGR	2	1	1	Q63355	N-Term(TMT10)	0	0.954911	2	6.33206	0.923178	2	4.11946	1.04206	2	4.05064	0.939129	2	2.82115	1.1012	2	0.804707	0.960974	2	4.43523	1.12487	2	1.84991	1.07148	2	2.06229	0.882685	2	9.04096	0	2.527e-13	82.74	1.48192e-07	2	2158.16	1.04712	78.1569	0
High	vTEFNNVTPLSEEEVASIk	3	2	2	A0A0G2JW88;Q5M7W5	N-Term(TMT10); K19(TMT10)	0																												0	2.212e-11	82.73	1.536e-07	2	2564.39	1.70144	87.6606	0
High	nSVVEASEAAYk	2	2	1	P68511	N-Term(TMT10); K12(TMT10)	0	1.02661	2	4.46106	0.981848	2	5.28097	0.985056	2	2.31069	0.948114	2	1.27403	1.08874	2	0.408774	0.897564	2	1.77121	1.10206	2	4.26767	1.05566	2	2.92786	0.987117	2	3.1789	0	2.824e-09	82.67	1.21399e-07	2	1725.95	1.58212	63.0117	0
High	fSNQETcVEIGESVR	3	3	1	A0A0G2JSV3	N-Term(TMT10); C7(Carbamidomethyl)	0	0.886374	3	10.613	0.823154	3	0.639143	1.04671	3	5.4413	0.986508	3	1.32152	1.11754	3	12.8695	0.973534	3	6.89317	1.12576	3	3.65593	1.12861	3	1.74487	0.811786	3	28.2572	0	7.029e-12	82.65	4.15587e-08	2	1983.97	0.741248	69.1153	0
High	gTQGVVTNFEIFR	1	1	1	Q4G061	N-Term(TMT10)	0	0.954219	1		0.983226	1		1.00627	1		1.07594	1		0.934646	1		1.05998	1		0.980381	1		0.983796	1		1.00886	1		0	4.861e-10	82.64	1.49194e-07	2	1696.93	2.29687	85.0449	0
High	aSEEEEIGGPEDSEAVQPR	2	3	1	G3V7Z3	N-Term(TMT10)	0	0.963185	2	3.08485	0.990497	2	2.23421	1.06239	2	3.65383	1.01743	2	6.77567	1.00776	2	5.71217	1.06336	2	6.93896	0.957712	2	13.759	0.951003	2	2.61251	0.958456	2	2.3419	0	1.271e-09	82.64	3.75707e-08	3	2258.07	2.10687	57.4704	0
High	yDYNSGEELESYk	1	1	1	Q5XIG8	N-Term(TMT10); K13(TMT10)	0	1.19536	1		1.18115	1		0.914045	1		1.00665	1		0.873262	1		1.03745	1		0.877381	1		0.906592	1		1.14455	1		0	1.089e-10	82.62	5.88042e-08	2	2055	0.704016	72.4947	0
High	aLGVSNFNHFQIER	3	7	2	G3V786;Q91W30	N-Term(TMT10)	0																												0	5.081e-11	82.59	1.4982e-07	2	1861	2.95473	75.0762	0
High	aGDLGVDLTSk	3	1	1	Q68FU3	N-Term(TMT10); K11(TMT10)	0	0.961827	3	3.04889	0.983266	3	0.0291065	0.986862	3	1.47877	1.04657	3	3.38748	0.981227	3	3.41386	1.04451	3	3.0783	1.02778	3	6.22732	1.01727	3	1.22824	0.922524	3	0.997291	0	5.967e-08	82.57	1.88969e-07	2	1533.89	1.86841	73.8295	0
High	fSNEEIAmATVTALR	4	1	1	P05065	N-Term(TMT10); M8(Oxidation)	0	0.897769	4	6.78084	0.837383	4	5.90398	0.989852	4	6.63577	1.0053	4	2.28683	1.07842	4	4.02449	1.02088	4	1.58756	1.14046	4	5.22206	1.1159	4	2.24448	0.863012	4	9.92959	0	4.705e-08	82.56	1.29782e-07	2	1898	5.66767	84.9076	0
High	dANEESScQDPDVGDGEEEER	3	1	1	Q66HF9	N-Term(TMT10); C8(Carbamidomethyl)	0	0.869831	3	34.0313	0.952569	3	1.4657	0.932192	3	5.00391	0.974485	3	4.7006	1.00508	3	4.06706	1.06541	3	4.9703	1.17293	3	14.4231	0.983987	3	6.05217	1.12648	3	1.05181	0	9.738e-10	82.55	5.54587e-09	3	2596.04	0.137776	45.7686	0
High	aSAEGREEEEAAAETEEk	2	1	1	Q5RKI5	N-Term(TMT10); K18(TMT10)	0	1.06154	2	3.37049	1.08529	2	12.7333	0.933745	2	5.34581	1.04831	2	3.2743	0.959936	2	4.60907	1.01558	2	4.72117	0.920134	2	6.686	0.948529	2	6.73024	1.09633	2	1.82987	0	1.059e-13	82.54	6.79767e-08	3	2394.17	2.50554	54.8454	1
High	aSFENNcEVGcFAk	1	2	1	Q3KRD8	N-Term(TMT10); C7(Carbamidomethyl); C11(Carbamidomethyl); K14(TMT10)	0	1.02878	1		1.02695	1		1.05891	1		1.10689	1		0.860055	1		1.16569	1		0.838924	1		0.833367	1		1.04872	1		0	9.316e-12	82.51	3.59071e-08	2	2091.01	1.1248	71.6567	0
High	sALQSINEWASQTTDGk	5	2	2	P29457;Q5RJR9	N-Term(TMT10); K17(TMT10)	0																												0	6.97e-10	82.51	1.62143e-07	3	2294.21	1.10853	86.4045	0
High	sDSLAGVVIADSEYPSR	1	1	1	Q5EGY4	N-Term(TMT10)	0	0.992679	1		0.922814	1		1.02016	1		0.978743	1		1.01525	1		0.944352	1		1.11338	1		1.1033	1		0.928814	1		0	2.788e-12	82.47	1.04471e-07	2	1995.03	1.7482	83.6087	0
High	gGVPETTELLk	7	1	1	P11883	N-Term(TMT10); K11(TMT10)	0	1.08668	7	5.6409	1.13782	7	11.6498	1.00952	7	5.4196	1.00485	7	2.54514	0.886813	7	11.9639	0.998469	7	6.95209	0.882881	7	6.20103	0.871608	7	3.18749	1.19106	7	9.56211	0	2.376e-07	82.44	1.78176e-07	2	1601.95	1.26939	71.9444	0
High	aAQTSVAYGcIk	2	1	1	P40329	N-Term(TMT10); C10(Carbamidomethyl); K12(TMT10)	0	0.949033	2	7.30874	0.976904	2	8.48478	1.03313	2	3.00733	1.05057	2	5.67241	0.927992	2	5.67449	1.09117	2	5.26957	0.990097	2	16.0389	0.980572	2	11.0443	0.951373	2	11.1315	0	2.142e-09	82.44	1.5537e-07	2	1726.96	2.02963	61.0855	0
High	dFNHINVELSLLGk	2	8	1	P17077	N-Term(TMT10); K14(TMT10)	0	0.950592	2	1.00932	0.978516	2	1.04626	0.96371	2	4.95326	1.04161	2	2.27305	0.978699	2	8.53584	1.08549	2	3.78284	1.00573	2	1.6252	0.965157	2	4.11113	1.02878	2	4.43749	0	6.087e-11	82.44	1.52519e-07	2	2057.18	1.83839	87.9659	0
High	aNLPQSFQVDTSk	4	1	1	C0JPT7	N-Term(TMT10); K13(TMT10)	0	1.00646	4	3.24825	0.996197	4	1.22125	0.969795	4	4.44162	1.04793	4	2.22235	1.00049	4	4.70784	1.04468	4	2.06493	0.956778	4	2.60879	0.938004	4	4.57171	1.07739	4	9.00271	0	3.274e-10	82.41	1.87736e-07	2	1893.05	1.87534	72.9808	0
High	yGTLIYTNYENGk	1	1	1	P04906	N-Term(TMT10); K13(TMT10)	0	0.67863	1		0.660756	1		0.993938	1		1.02734	1		1.21435	1		1.07995	1		1.27273	1		1.20762	1		0.702023	1		0	9.15e-11	82.39	1.67839e-07	2	1994.06	0.361715	79.4927	0
High	gEGYSNPNEGATVEVHLEGccAGR	1	1	1	Q5U2T9	N-Term(TMT10); C20(Carbamidomethyl); C21(Carbamidomethyl)	0	1.01125	1		0.928846	1		0.933787	1		0.980799	1		1.04982	1		1.0341	1		1.02964	1		1.07189	1		0.993981	1		0	3.778e-15	82.39	1.47075e-08	3	2792.26	1.99476	63.5088	0
High	qNYSTEVEAAVNR	3	7	1	P02793	N-Term(TMT10)	0	0.726139	3	6.51593	0.698085	3	7.26541	1.08896	3	0.282739	1.03367	3	3.76475	1.18992	3	0.341469	1.0262	3	3.73126	1.29759	3	0.880687	1.22194	3	1.7895	0.63315	3	10.8247	0	4.772e-10	82.38	7.45744e-08	2	1709.87	2.216	63.23	0
High	ePALNEANLSNLk	5	2	1	Q6P9V7	N-Term(TMT10); K13(TMT10)	0	0.907601	5	3.54562	0.941929	5	5.57201	1.06302	5	1.9542	1.06683	5	1.65957	0.997092	5	2.36412	1.08616	5	2.15228	0.978544	5	2.69789	1.01602	5	1.7578	0.911098	5	3.36986	0	7.128e-10	82.38	1.75452e-07	2	1871.07	1.68294	76.4434	0
High	eNQEPLGYEEAEGQILER	3	3	1	G3V8F8	N-Term(TMT10)	0	1.43417	3	5.03146	1.4651	3	3.50073	0.802683	3	0.758855	0.848147	3	2.68782	0.813696	3	3.8294	0.841204	3	6.47427	0.862342	3	3.15298	0.896576	3	7.97342	1.44962	3	1.94297	0	1.004e-13	82.38	7.60196e-08	2	2333.15	2.03119	78.1187	0
High	aPVPASELLASk	3	13	1	Q6S3A0	N-Term(TMT10); K12(TMT10)	0	1.05351	3	3.80757	1.10752	3	4.1108	1.02143	3	0.669639	0.987405	3	1.72062	1.00207	3	9.4769	1.00837	3	2.44302	0.959408	3	4.85714	0.952829	3	5.65151	1.04646	3	9.71541	0	7.341e-07	82.36	9.84396e-08	2	1641	1.28385	78.4197	0
High	dAYQVILDGVk	2	1	1	B1WC49	N-Term(TMT10); K11(TMT10)	0	1.10455	2	0.290198	1.06853	2	1.8573	0.939981	2	0.874093	1.02379	2	0.716017	0.973534	2	2.26338	1.00556	2	2.76584	0.954729	2	1.00642	0.967228	2	1.26575	1.04163	2	2.45071	0	3.558e-08	82.34	1.98955e-07	2	1678.98	1.10823	86.0855	0
High	tLHVEEVVPSVIEPSFGLGR	2	1	1	Q5I0G4	N-Term(TMT10)	0	0.827731	2	19.0916	0.829172	2	18.9576	1.0179	2	0.956731	1.07854	2	13.0054	1.03993	2	14.7421	1.12311	2	1.70409	0.988338	2	1.78512	1.02722	2	1.34615	0.953484	2	6.07516	0	1.442e-11	82.3	2.15517e-07	2	2394.32	0.779122	87.7492	0
High	mLQTSSVLVSGLR	2	1	1	Q5U300	N-Term(TMT10)	0	1.01013	2	0.997008	1.03173	2	0.907713	1.03824	2	0.0547522	0.97937	2	2.16335	0.976511	2	3.61195	1.01601	2	3.07115	1.00434	2	12.1481	0.979573	2	2.1177	0.985314	2	11.8101	0	2.015e-09	82.28	2.35146e-07	2	1619.94	2.61579	85.5981	0
High	iSmADVDLNVAAPk	1	2	1	A0A0G2JUA5	N-Term(TMT10); M3(Oxidation); K14(TMT10)	0	1.08502	1		1.03266	1		0.898772	1		0.950233	1		1.06538	1		0.960713	1		1.03386	1		1.06185	1		1.01667	1		0	3.944e-10	82.28	1.9137e-07	2	1918.07	0.450074	75.8843	0
High	sFESTVGQGSDTYSYIFR	2	1	1	Q6AY20	N-Term(TMT10)	0	1.09982	2	0.895948	1.0436	2	7.04903	0.901966	2	3.13764	0.986874	2	0.53915	0.92916	2	5.43924	1.084	2	4.93867	0.951269	2	2.52531	0.967257	2	3.7174	1.11855	2	3.29219	0	1.983e-13	82.26	4.33833e-08	2	2273.1	1.68304	87.1496	0
High	dVQMLQDAISk	2	3	1	A0A140TAG9	N-Term(TMT10); K11(TMT10)	0	0.876009	2	12.7928	0.883138	2	0.333451	1.04714	2	1.50275	1.0349	2	3.33712	1.08752	2	15.5925	1.1046	2	2.67405	0.973056	2	1.98562	0.999391	2	1.43778	0.911469	2	1.97078	0	5.088e-08	82.25	1.78699e-07	2	1705.96	1.73779	84.3878	0
High	iLAQITGTEHLk	3	1	1	Q62920	N-Term(TMT10); K12(TMT10)	0	0.954799	3	2.94144	1.03917	3	4.27177	0.937806	3	0.648746	1.02669	3	4.30597	1.02579	3	0.559547	1.00697	3	4.67552	1.03916	3	2.12769	1.04054	3	3.80268	0.971762	3	0.725049	0	2.292e-09	82.25	9.38168e-08	2	1782.09	2.42076	78.766	0
High	wkDTDEADLVLAk	2	1	1	B2RYU7	N-Term(TMT10); K2(TMT10); K13(TMT10)	0	1.25459	2	7.40961	1.2634	2	4.80591	0.899196	2	1.88253	0.948215	2	2.84162	0.894483	2	5.80557	0.929696	2	4.14887	0.908673	2	2.96642	0.879965	2	0.804849	1.24139	2	4.50369	0	1.716e-10	82.24	1.93141e-07	2	2191.26	1.6862	80.4588	1
High	tIYAGNALcTVk	2	1	1	P13803	N-Term(TMT10); C9(Carbamidomethyl); K12(TMT10)	0	0.980192	2	13.5565	0.931371	2	4.6999	1.00367	2	0.897421	0.996546	2	2.01493	1.00265	2	5.75418	1.02515	2	0.955354	1.01711	2	10.6244	1.08272	2	9.97359	0.952233	2	4.30583	0	4.577e-09	82.22	1.66742e-07	2	1769.01	1.73198	72.2322	0
High	lNATNIELATVQPGQNFHMFTk	2	2	1	P34064	N-Term(TMT10); K22(TMT10)	0	0.974959	2	8.93308	1.01675	2	5.90935	0.994977	2	0.119908	1.05237	2	1.24669	0.944837	2	3.78599	1.07124	2	8.68833	0.926311	2	0.987905	0.937491	2	9.50358	1.09049	2	3.0154	0	9.897e-13	82.12	1.57123e-07	3	2932.58	2.73718	87.0927	0
High	sGGELDIVVTSNk	1	2	1	G3V834	N-Term(TMT10); K13(TMT10)	0	1.06716	1		1.00992	1		0.990664	1		0.947506	1		1.02832	1		0.952955	1		1.03163	1		1.03653	1		1.01077	1		0	7.026e-10	82.07	2.00541e-07	2	1777.02	3.35165	72.7228	0
High	eLGSLPQEAFEk	1	3	1	D4A1B9	N-Term(TMT10); K12(TMT10)	0	1.21984	1		1.239	1		0.894263	1		0.920812	1		0.904328	1		0.985997	1		0.938624	1		0.881128	1		1.21796	1		0	1.823e-09	82.06	1.98825e-07	2	1806.01	0.972403	82.7274	0
High	nAQAMADALLk	3	1	1	Q5U3Z7	N-Term(TMT10); K11(TMT10)	0	0.764688	3	1.45621	0.747988	3	0.272336	1.14074	3	0.655842	1.08946	3	2.64535	1.11092	3	0.678513	1.0351	3	5.64927	1.14406	3	5.36028	1.10088	3	1.0314	0.718575	3	2.07959	0	6.638e-08	82.04	2.14122e-07	2	1603.93	1.97045	83.2821	0
High	tLFATEDSLEVR	2	1	1	Q63355	N-Term(TMT10)	0	0.977723	2	1.71794	0.938739	2	7.84948	0.988975	2	5.49325	0.999191	2	2.31771	1.06752	2	2.10494	1.00512	2	1.52506	1.0562	2	2.73867	1.06403	2	0.104321	0.902105	2	7.3714	0	4.561e-09	82.04	1.50979e-07	2	1609.87	2.14779	80.6258	0
High	gFGTDEQAIVDVVSNR	3	2	1	Q6IRJ7	N-Term(TMT10)	0	0.999795	3	4.32244	1.00803	3	0.796227	0.937802	3	0.328335	1.04944	3	2.94362	0.967797	3	0.856696	1.08233	3	3.17316	0.939701	3	2.39489	0.987775	3	6.26572	1.05147	3	2.81318	0	2.866e-12	82.04	1.40664e-07	2	1936	3.24711	87.8657	0
High	qVMVVPVGPTcDEYAQk	2	2	1	A0A0G2K9V6	N-Term(TMT10); C11(Carbamidomethyl); K17(TMT10)	0	0.94032	2	21.991	0.80493	2	7.05181	1.01893	2	0.434354	1.06035	2	5.8329	1.02056	2	2.74829	1.09697	2	5.58072	1.03978	2	1.99429	1.05167	2	1.65431	0.874439	2	14.6813	0	1.67e-09	82	1.57424e-07	2	2379.25	1.46164	77.2407	0
High	aQAALAVNISAAR	5	1	1	Q3MHS9	N-Term(TMT10)	0	0.864463	5	9.95321	0.835959	5	3.66948	1.07122	5	4.03007	1.09433	5	5.15063	1.02281	5	4.37398	1.08145	5	2.78961	1.05994	5	3.07001	1.03151	5	4.99277	0.862764	5	9.62055	0	1.007e-09	81.98	1.57834e-07	2	1484.88	2.36257	68.2124	0
High	aTFYGEQVDYYk	4	2	1	G3V7Q7	N-Term(TMT10); K12(TMT10)	0	1.00431	4	9.21916	1.05997	4	4.52364	0.932035	4	4.4421	1.06617	4	4.65341	0.913336	4	12.7301	1.10324	4	4.458	0.895172	4	14.5559	0.940007	4	6.57335	1.11272	4	12.5623	0	8.14e-10	81.98	1.34697e-07	2	1942	1.84874	78.423	0
High	nQVAMNPTNTVFDAk	4	5	1	P63018	N-Term(TMT10); K15(TMT10)	0	0.993868	4	2.33993	0.992876	4	1.53676	0.970754	4	2.74897	0.93965	4	1.55521	1.05562	4	2.17119	0.956927	4	4.67259	1.10694	4	6.77587	1.03712	4	3.86053	0.970677	4	4.06996	0	9.117e-12	81.94	1.66651e-07	2	2108.13	2.43961	74.4216	0
High	aGYTDQVVIGmDVAASEFYR	3	3	1	M0R5J4	N-Term(TMT10); M11(Oxidation)	0	0.899695	3	2.39309	0.890715	3	1.07972	0.904227	3	1.76574	1.06063	3	1.13519	1.02329	3	6.12001	1.10139	3	0.753383	0.977009	3	0.197215	1.13962	3	3.98692	0.990681	3	8.73116	0	6.25e-10	81.88	8.0755e-08	2	2437.2	1.77567	85.9631	0
High	gSNNVALGYDEGSIIVk	6	3	2	Q5M7X1;O35142	N-Term(TMT10); K17(TMT10)	0																												0	2.071e-12	81.87	1.89838e-07	2	2194.22	1.8534	79.4379	0
High	aGQVGATLTEGQPPDVEMPAk	1	1	1	F1LUD3	N-Term(TMT10); K21(TMT10)	0	0.943111	1		0.985278	1		0.916265	1		0.992359	1		0.998751	1		1.06364	1		0.997154	1		1.06062	1		1.0819	1		0	5.114e-12	81.84	1.68569e-07	2	2554.36	0.325498	77.8625	0
High	aTGPPVSELITk	6	1	1	D3ZBN0	N-Term(TMT10); K12(TMT10)	0	1.16682	6	10.558	1.20781	6	2.4833	0.9391	6	4.2658	0.959284	6	0.906572	0.911735	6	4.93456	0.952532	6	1.73719	0.898757	6	8.50667	0.929946	6	5.82235	1.18675	6	4.21392	0	1.86e-09	81.82	1.23969e-07	2	1671.01	1.95423	78.1915	0
High	nTFcSGSDLNAVk	1	1	1	Q6AYG5	N-Term(TMT10); C4(Carbamidomethyl); K13(TMT10)	0	1.04786	1		1.01555	1		1.01003	1		0.913107	1		1.09894	1		0.869615	1		1.12669	1		1.07141	1		0.930787	1		0	3.4e-10	81.81	1.1964e-07	2	1870.98	1.98777	64.8055	0
High	tVAGGAWTYNTTSAVTVk	4	2	1	A0A0H2UHU1	N-Term(TMT10); K18(TMT10)	0	1.01682	4	0.854794	0.989511	4	3.00129	0.992643	4	2.5613	0.987489	4	0.998599	1.0235	4	1.31289	1.0085	4	4.18984	0.976627	4	2.34007	0.985318	4	2.7199	1.06118	4	2.19272	0	2.151e-12	81.79	2.05949e-07	2	2285.26	2.44083	78.1882	0
High	hFQLEQDkPEEQTAHAFVNVLTR	6	1	1	P12785	N-Term(TMT10); K8(TMT10)	0	1.14312	6	8.88863	1.0384	6	5.8301	0.943735	6	4.01303	0.935909	6	5.55921	1.01151	6	3.87567	0.932817	6	1.5174	1.03512	6	2.83053	0.995691	6	2.24994	1.08899	6	5.01452	0	2.628e-14	81.78	1.90826e-07	3	3195.7	-0.0575222	80.8189	0
High	nADMSEEMQQDSVEcATQALEk	2	1	1	P63170	N-Term(TMT10); C15(Carbamidomethyl); K22(TMT10)	0	1.08715	2	2.47926	1.08542	2	5.0226	1.02428	2	1.74038	0.952706	2	5.83515	0.965444	2	6.5444	0.973733	2	2.04741	0.945821	2	4.52516	0.978691	2	0.279899	1.06893	2	7.41532	0	3.627e-12	81.77	3.62574e-08	3	2972.38	2.19053	85.0311	0
High	iTEGDLSQLTASIR	2	2	1	A0A0H2UHR7	N-Term(TMT10)	0	0.993408	2	12.5147	1.03912	2	4.15853	1.00861	2	6.06799	1.06212	2	14.0454	0.990782	2	3.22459	0.955012	2	1.11185	1.02512	2	3.24676	1.03663	2	7.99448	0.889974	2	9.19885	0	2.854e-10	81.76	2.10711e-07	2	1732.97	1.60148	87.3904	0
High	sWDSEEILEGYk	2	4	1	F1LPV0	N-Term(TMT10); K12(TMT10)	0	0.751679	2	3.77928	0.793488	2	1.12608	1.06496	2	6.8091	1.14228	2	0.694669	1.03405	2	2.99779	1.16469	2	4.26442	1.02299	2	3.07912	1.07349	2	5.67456	0.766408	2	1.53725	0	3.068e-09	81.71	1.40302e-07	2	1913.99	1.88006	85.149	0
High	iDVSVEAASGGk	5	1	1	Q6P6R2	N-Term(TMT10); K12(TMT10)	0	0.892592	5	7.71707	0.950689	5	6.98807	1.06317	5	4.99458	1.04647	5	4.58182	1.01396	5	3.9971	1.0005	5	6.43775	1.00747	5	4.18835	1.00657	5	1.50235	0.94549	5	5.87207	0	6.881e-09	81.7	2.39333e-07	2	1590.91	1.3501	67.8985	0
High	sASVTTTTMTGGGGEEk	4	1	1	Q4G079	N-Term(TMT10); K17(TMT10)	0	0.963407	4	12.7123	0.902985	4	18.122	1.08794	4	7.28413	0.961347	4	1.92279	1.09336	4	9.41124	0.941104	4	7.23464	1.06963	4	9.50025	0.964522	4	7.0033	0.990796	4	6.14825	0	1.032e-11	81.7	1.44006e-07	2	2072.07	3.36758	57.2265	0
High	yFQINQDEEEEEDED	2	2	1	Q6PDV8	N-Term(TMT10)	0	1.00057	2	0.161925	0.986413	2	9.17815	0.966243	2	0.55967	1.02904	2	0.597781	1.00909	2	7.91412	0.987415	2	1.47522	0.987052	2	7.30236	1.01151	2	5.62252	1.06063	2	11.2695	0	7.38e-08	81.7	6.74481e-09	2	2160.89	0.334642	81.5432	0
High	gLLSQGSPLSWEETQR	1	1	1	P19468	N-Term(TMT10)	0	0.933765	1		1.03167	1		1.00503	1		1.01556	1		1.00655	1		1.0342	1		0.958591	1		1.07319	1		0.942191	1		0	1.079e-12	81.66	1.65126e-07	2	2017.06	2.76408	85.1667	0
High	aTEVPLSWQSFNk	2	2	1	E9PU64	N-Term(TMT10); K13(TMT10)	0	0.939637	2	7.05333	0.900131	2	2.64383	1.03596	2	1.69638	1.08047	2	3.55784	0.957806	2	3.5822	1.129	2	2.7363	0.964192	2	0.555236	1.00961	2	2.66613	0.907076	2	6.20797	0	9.381e-10	81.65	2.12697e-07	2	1965.09	1.48935	85.2019	0
High	gDILVVATGQPEMVk	1	4	1	G3V6S5	N-Term(TMT10); K15(TMT10)	0	0.925219	1		1.00816	1		0.980749	1		1.03549	1		1.04117	1		1.04983	1		1.00534	1		0.981194	1		0.971707	1		0	4.014e-11	81.64	1.98792e-07	2	2015.17	3.13263	85.0923	0
High	iLATPPQEDAPSVDIANIR	3	2	1	P50137	N-Term(TMT10)	0	0.745319	3	25.9041	0.742392	3	2.53092	1.04	3	3.89415	1.14646	3	4.06184	1.08034	3	4.25474	1.09629	3	11.9324	1.09728	3	4.25009	1.03861	3	2.64379	0.721832	3	1.72275	0	7.948e-09	81.64	2.19699e-07	2	2249.24	1.71492	84.767	0
High	eAGDGVFEcEYYPVIPGk	2	2	1	A0A0H2UHR7	N-Term(TMT10); C9(Carbamidomethyl); K18(TMT10)	0	1.2046	2	1.41102	1.2699	2	1.91734	0.889076	2	5.28827	0.997379	2	1.51448	0.858639	2	4.59263	1.03072	2	0.894984	0.816088	2	2.93517	0.877234	2	0.147178	1.2324	2	5.55349	0	2.343e-11	81.64	1.15505e-07	2	2488.25	-0.000558124	87.3761	0
High	gDVEEDEAIPDSEQDIRPR	2	2	1	F1LQP9	N-Term(TMT10)	0	0.952279	2	4.72466	0.949924	2	5.44711	1.05009	2	2.84773	0.982921	2	3.2852	1.03758	2	1.34119	0.996353	2	5.0136	1.04725	2	0.149064	1.03629	2	0.150802	0.941214	2	4.7261	0	1.435e-10	81.63	5.39349e-08	3	2399.16	1.1647	60.2372	0
High	cGTGIVGVFVk	2	1	1	P52944	N-Term(TMT10); C1(Carbamidomethyl); K11(TMT10)	0	0.987845	2	1.54595	1.00226	2	0.270516	1.08744	2	1.49983	0.98248	2	4.23626	1.0229	2	1.87614	0.947229	2	2.60649	1.04524	2	0.478187	0.987176	2	1.84724	0.954152	2	2.88391	0	3.817e-08	81.61	2.18116e-07	2	1594.94	1.96812	84.9186	0
High	aGGIETIANEYSDR	3	2	1	O88600	N-Term(TMT10)	0	0.941664	3	3.82973	0.948881	3	4.44339	0.98743	3	0.264848	1.00411	3	0.548559	0.963375	3	2.74483	1.05767	3	10.6946	0.983451	3	8.84078	1.00862	3	1.09549	1.02838	3	1.72516	0	4.697e-11	81.59	8.63315e-08	2	1724.87	0.471437	72.9362	0
High	aSGPPVSELITk	12	3	3	P15865;A0A0G2K654;M0R7B4	N-Term(TMT10); K12(TMT10)	0																												0	1.572e-08	81.58	1.47693e-07	2	1657	1.91218	75.6333	0
High	sQGQDVTSSVYFMk	3	2	1	D4ABI6	N-Term(TMT10); K14(TMT10)	0	0.875904	3	2.99562	0.939953	3	4.20236	1.0226	3	0.171427	1.05208	3	2.65934	1.03013	3	4.0853	1.05979	3	0.363699	1.03801	3	3.24891	1.03273	3	0.311009	0.872149	3	5.43959	0	1.032e-11	81.58	1.54643e-07	2	2035.06	1.17468	78.3353	0
High	fFQAAcDVPELQDk	2	2	1	G3V7Q7	N-Term(TMT10); C6(Carbamidomethyl); K14(TMT10)	0	1.0093	2	0.856572	1.02514	2	0.189817	1.08463	2	5.26351	1.02513	2	4.99247	0.968306	2	0.991448	1.00596	2	0.634189	0.991593	2	5.63512	0.948086	2	2.20366	0.934093	2	14.4214	0	6.844e-11	81.58	1.60898e-07	2	2126.1	0.49861	86.4095	0
High	eTPAASEAPSSAAk	2	2	2	A0A0G2K1L8;Q05175	N-Term(TMT10); K14(TMT10)	0																												0	4.51e-08	81.56	1.7386e-07	2	1774.96	1.03303	48.3958	0
High	acAELHQNVNVk	5	2	1	G3V8A5	N-Term(TMT10); C2(Carbamidomethyl); K12(TMT10)	0	1.27019	5	20.3715	1.24866	5	11.4568	0.940828	5	8.73203	1.00185	5	1.52289	0.793162	5	11.1666	1.00218	5	10.6085	0.838196	5	12.2068	0.853049	5	26.3557	1.19175	5	18.2959	0	1.51e-10	81.55	2.03654e-07	2	1841.01	0.659952	55.4618	0
High	sLLLDAASGQLR	2	1	1	Q4QQW8	N-Term(TMT10)	0	1.14767	2	6.74421	1.13657	2	3.12152	0.964674	2	4.02847	0.931648	2	2.11501	1.00319	2	4.91147	0.903135	2	1.12452	1.02181	2	1.38145	0.998318	2	0.913568	1.0295	2	4.48864	0	6.961e-09	81.54	2.04123e-07	2	1472.86	0.482082	82.6023	0
High	lTLHGLQQYYVk	2	3	2	Q63413;Q5U216	N-Term(TMT10); K12(TMT10)	0																												0	7.934e-10	81.54	1.85184e-07	2	1921.13	1.8353	79.8848	0
High	tSVLAAANPIESQWNPk	1	1	1	G3V681	N-Term(TMT10); K17(TMT10)	0	1.16719	1		1.13741	1		0.94221	1		0.988603	1		0.90074	1		0.960489	1		0.972738	1		0.927647	1		1.14311	1		0	6.516e-13	81.53	2.23577e-07	2	2284.28	2.91898	84.8944	0
High	aQAGLcVcASSEPVcGSDAk	1	1	1	Q9QZK5	N-Term(TMT10); C6(Carbamidomethyl); C8(Carbamidomethyl); C15(Carbamidomethyl); K20(TMT10)	0	1.10865	1		1.12525	1		1.04787	1		1.08712	1		0.793401	1		1.0474	1		0.854767	1		0.815835	1		1.17989	1		0	1.476e-14	81.53	7.41741e-08	2	2525.23	2.34449	64.8863	0
High	aIEEEGGNPDEIEVISEGNkk	1	3	1	M0RBF0	N-Term(TMT10); K20(TMT10); K21(TMT10)	0	1.13533	1		1.18318	1		0.910332	1		0.953566	1		0.922145	1		0.96634	1		0.958041	1		0.895817	1		1.24984	1		0	3.691e-15	81.46	2.17564e-07	3	2944.57	-0.00466404	73.1148	1
High	gSSGcVEcLEVTcR	4	1	1	Q66H61	N-Term(TMT10); C5(Carbamidomethyl); C8(Carbamidomethyl); C13(Carbamidomethyl)	0	0.995198	4	9.25203	0.935897	4	17.3182	1.01562	4	2.62183	1.02863	4	3.95284	0.969189	4	13.5014	0.986199	4	5.8498	1.01025	4	17.3796	1.02009	4	14.5918	1.02983	4	15.2685	0	8.057e-12	81.43	1.54682e-08	2	1842.84	0.59455	61.5405	0
High	scTQSATAPQQEADAEANQETGNk	1	2	1	A0A0G2K9F7	N-Term(TMT10); C2(Carbamidomethyl); K24(TMT10)	0	0.886371	1		1.12068	1		1.06893	1		0.906444	1		1.01268	1		0.941938	1		1.11175	1		0.98057	1		1.02438	1		0	1.778e-13	81.43	5.57573e-08	3	2994.41	1.23256	53.5219	0
High	dVDGLTSINAGk	1	4	1	G3V6S5	N-Term(TMT10); K12(TMT10)	0	1.04641	1		1.04437	1		0.985319	1		0.999945	1		0.977915	1		1.02144	1		0.97189	1		0.967162	1		1.03949	1		0	2.376e-09	81.4	2.39426e-07	2	1647.94	2.57744	68.3978	0
High	cADYVVTGAWSAk	2	5	1	Q80YG1	N-Term(TMT10); C1(Carbamidomethyl); K13(TMT10)	0	0.910097	2	5.11105	0.898767	2	0.15389	1.04749	2	1.71483	1.06004	2	0.0748963	1.00301	2	2.54642	1.06099	2	1.43415	1.04289	2	2.0103	1.01987	2	2.29686	0.893735	2	3.47833	0	3.936e-10	81.4	1.41265e-07	2	1885.99	1.76324	77.7351	0
High	gQcGENLAWASYDQTGk	2	1	1	F1M5V2	N-Term(TMT10); C3(Carbamidomethyl); K17(TMT10)	0	1.05852	2	12.8452	1.08111	2	16.3874	0.946997	2	3.96515	1.00946	2	5.54791	0.912122	2	9.51473	1.02984	2	2.42146	0.886082	2	13.6767	0.950213	2	10.5141	1.19734	2	13.7204	0	5.422e-13	81.37	8.27934e-08	2	2343.15	0.647041	73.2174	0
High	gFGVDTETPNLEGTLTGPk	4	2	1	A0A0G2JUA5	N-Term(TMT10); K19(TMT10)	0	1.1794	4	0.799818	1.19399	4	2.17038	0.893255	4	3.1507	0.96636	4	0.299577	0.909819	4	2.04974	0.979511	4	3.32518	0.861154	4	6.94019	0.887034	4	4.92254	1.25793	4	2.51811	0	4.39e-10	81.37	2.11178e-07	2	2391.28	0.584984	84.3504	0
High	eTVQTTEDQILk	5	3	1	P85972	N-Term(TMT10); K12(TMT10)	0	1.02336	5	8.45023	1.09917	5	16.2038	0.944407	5	5.21027	0.940684	5	2.64224	0.983034	5	9.88567	0.994399	5	5.73031	1.02758	5	11.964	1.03757	5	11.7773	1.13644	5	1.9218	0	3.538e-09	81.33	2.25647e-07	2	1863.05	2.13412	70.1951	0
High	aVTELNEPLSNEDR	1	1	1	P68511	N-Term(TMT10)	0	1.17619	1		1.19532	1		0.9048	1		0.947554	1		0.905307	1		0.92599	1		0.933499	1		0.954321	1		1.25505	1		0	2.317e-10	81.31	1.26842e-07	2	1815.93	2.87576	63.3606	0
High	fLEQQNQVLQTk	2	7	2	A0A0G2JXH6;A0A0G2JST3	N-Term(TMT10); K12(TMT10)	0																												0	7.393e-10	81.31	2.34825e-07	2	1934.11	1.23451	75.9755	0
High	dPNASPGDAGEQAIR	5	3	1	P85972	N-Term(TMT10)	0	1.08013	5	14.4589	0.996694	5	27.8878	0.963672	5	4.324	0.94391	5	10.9938	0.962554	5	8.56877	0.933947	5	13.7261	1.01103	5	10.5379	1.114	5	13.012	1.05926	5	13.5407	0	9.181e-08	81.27	7.57645e-08	2	1726.86	2.63823	49.9356	0
High	iVALSSSLSNAk	2	2	1	M3ZCQ2	N-Term(TMT10); K12(TMT10)	0	0.950296	2	1.63522	0.98101	2	5.2297	0.976639	2	0.551642	1.02854	2	1.05087	1.00518	2	1.20077	1.02698	2	2.29903	1.03297	2	6.07614	1.0571	2	2.37306	0.941477	2	0.31768	0	6.045e-09	81.26	2.41285e-07	2	1648.01	1.46256	80.0351	0
High	dDGSWEVIEGYR	3	1	1	P10860	N-Term(TMT10)	0	1.02306	3	5.17711	0.998003	3	1.93173	0.979161	3	0.645694	1.06508	3	3.36873	0.948047	3	0.84367	1.03087	3	0.456373	1.01087	3	1.32215	1.00321	3	2.7499	1.02423	3	3.45788	0	1.115e-08	81.21	5.67625e-08	2	1654.8	3.08006	81.3168	0
High	gHVPLLAVcDYk	2	13	1	Q6S3A0	N-Term(TMT10); C9(Carbamidomethyl); K12(TMT10)	0	1.12736	2	2.31093	1.17076	2	6.27822	0.979674	2	0.845039	1.04883	2	2.53911	0.863971	2	1.82206	1.06562	2	5.40122	0.810946	2	1.41361	0.846294	2	7.04303	1.17616	2	0.489649	0	6.058e-09	81.2	2.10505e-07	2	1830.04	1.66122	72.9563	0
High	aLTNLPHTDFTLck	2	1	1	A0A0G2JU77	N-Term(TMT10); C13(Carbamidomethyl); K14(TMT10)	0	0.984029	2	10.9328	1.00164	2	7.8497	1.01898	2	1.7537	1.06138	2	1.23159	0.917479	2	3.46108	1.11372	2	1.84694	0.933237	2	3.71253	0.910576	2	5.82274	1.04227	2	3.73654	0	1.521e-11	81.19	2.35321e-07	2	2089.15	1.042	80.2536	0
High	aGLNcSTETMPIk	1	1	1	P68101	N-Term(TMT10); C5(Carbamidomethyl); K13(TMT10)	0	0.983533	1		1.05919	1		1.04822	1		1.06229	1		0.906984	1		1.16627	1		0.915779	1		0.884038	1		0.932262	1		0	4.542e-10	81.18	2.1262e-07	2	1880.01	2.0105	66.3644	0
High	mEDGVGcLETAEEAk	2	2	1	G3V6P7	N-Term(TMT10); M1(Oxidation); C7(Carbamidomethyl); K15(TMT10)	0	0.852868	2	3.40464	0.925674	2	3.32726	1.00909	2	1.90099	0.96483	2	4.92667	1.129	2	1.16257	0.983705	2	1.64578	1.14378	2	7.95319	1.09509	2	1.83497	0.872911	2	2.79678	0	2.807e-11	81.16	5.89509e-08	2	2113.02	1.79679	66.0371	0
High	tMDVIAEGDPGFk	1	1	1	D3ZC89	N-Term(TMT10); K13(TMT10)	0	0.943878	1		0.932926	1		1.04276	1		1.0326	1		1.02846	1		1.02688	1		1.02007	1		1.03938	1		0.900808	1		0	1.419e-08	81.13	1.9234e-07	2	1837.99	4.78357	79.7243	0
High	qLVEQVEQIQk	3	1	1	Q5I0E7	N-Term(TMT10); K11(TMT10)	0	0.966719	3	5.25893	1.00606	3	3.94568	1.02718	3	0.0612398	1.01802	3	0.587411	1.0218	3	4.36696	0.976428	3	2.68943	1.0092	3	0.78899	1.02521	3	2.59115	0.960209	3	0.997427	0	9.929e-08	81.11	1.97101e-07	2	1800.07	2.02479	76.9942	0
High	tTETQVLVASAQk	3	1	1	Q4QQV4	N-Term(TMT10); K13(TMT10)	0	0.847869	3	0.0541328	0.847833	3	4.04153	1.12779	3	5.54368	0.962986	3	2.44795	1.11937	3	2.10123	0.938014	3	6.51612	1.19572	3	1.33665	1.1338	3	4.54475	0.70799	3	16.8422	0	9.439e-10	81.1	2.24724e-07	2	1834.07	1.06263	65.5726	0
High	qGLLGINIAEk	2	1	1	P15650	N-Term(TMT10); K11(TMT10)	0	0.924208	2	4.54106	0.934697	2	1.26899	1.00207	2	0.817202	1.01865	2	3.92823	1.05752	2	0.159528	1.02763	2	1.03694	1.07245	2	1.16184	1.04583	2	5.7181	0.890379	2	8.86386	0	1.962e-08	81.07	1.30141e-07	2	1614	1.17649	85.3783	0
High	dNPGVVTcLDEAR	1	1	1	Q5U300	N-Term(TMT10); C8(Carbamidomethyl)	0	1.05393	1		1.02804	1		1.02096	1		0.98178	1		0.992987	1		0.975808	1		0.994231	1		1.00043	1		1.0052	1		0	1.191e-09	81.07	9.34045e-08	2	1674.84	2.64146	62.347	0
High	lVVVGGGGVGk	3	2	2	Q5BJU0;D3Z8L7	N-Term(TMT10); K11(TMT10)	0																												0	1.158e-07	81.05	8.71612e-08	2	1399.91	1.10417	69.031	0
High	eDDVGTGAGLLEIk	2	1	1	Q6P502	N-Term(TMT10); K14(TMT10)	0	0.898151	2	2.72396	0.902233	2	4.73614	0.995711	2	1.00003	1.05912	2	1.60468	1.03469	2	0.954324	1.05337	2	2.15314	1.05317	2	1.74512	1.04283	2	3.92688	0.914859	2	2.95432	0	3.872e-11	81.05	2.43423e-07	2	1875.05	0.216491	82.4236	0
High	fAQPGSFEYEYAMR	2	1	1	Q5FVM4	N-Term(TMT10)	0	1.16921	2	2.8774	1.0923	2	6.67501	0.910321	2	3.42929	0.965018	2	4.82653	0.965832	2	2.17504	1.00361	2	3.66068	0.966965	2	0.709101	1.01306	2	0.171403	1.02623	2	5.36209	0	1.087e-10	81.05	4.35806e-08	2	1924.91	2.36746	83.6269	0
High	tITLEVEPxDTIENVk	28	9	2	P62986;P62982	N-Term(TMT10); X9(S); K16(TMT10)	0																												0	2.108e-08	81.05	2.39497e-07	2	2246.26	1.40231	84.6474	0
High	hALLEADVAAHQDR	4	6	1	Q6IRK8	N-Term(TMT10)	0	0.922022	4	16.2757	0.901199	4	9.7068	1.04595	4	11.8519	0.882542	4	2.52666	1.13796	4	6.55427	0.895857	4	1.25953	1.1208	4	13.1482	1.10475	4	5.31663	1.02702	4	23.8138	0	6.016e-11	81.03	1.66055e-07	3	1774.94	0.492794	53.3278	0
High	ncAQFVTGSQAR	1	1	1	P31399	N-Term(TMT10); C2(Carbamidomethyl)	0	0.983341	1		0.892693	1		1.01231	1		0.892537	1		1.20219	1		0.801168	1		1.3016	1		1.14749	1		0.821166	1		0	7.654e-10	80.99	1.01112e-07	2	1567.79	0.351253	53.3205	0
High	lRDEEVHTGLGELLR	8	1	1	Q5RJR9	N-Term(TMT10)	0	1.05927	8	4.71461	1.07261	8	5.19197	0.986718	8	5.41141	0.978023	8	6.48751	0.962525	8	5.58035	0.959689	8	4.98178	0.964899	8	7.2997	1.02268	8	6.19798	1.03945	8	9.90714	0	4.616e-12	80.98	2.72515e-07	2	1966.09	0.545181	70.9342	1
High	gADDAADADTAIINAEGGQNNSEEkk	1	3	1	A0A0G2JUT1	N-Term(TMT10); K25(TMT10); K26(TMT10)	0	1.27342	1		1.25503	1		0.86979	1		0.899411	1		0.91893	1		0.908222	1		0.96864	1		0.867465	1		1.29937	1		0	1.702e-16	80.96	1.3869e-07	3	3291.66	0.737695	66.9468	1
High	vEGFNYAGMGNSTNk	1	1	1	D4A9D6	N-Term(TMT10); K15(TMT10)	0	1.16445	1		1.11101	1		0.954127	1		0.959428	1		0.971174	1		0.965654	1		0.94895	1		0.971145	1		1.08092	1		0	1.819e-12	80.95	1.23341e-07	2	2047.03	1.22427	72.6208	0
High	gWVNTLVGGQk	2	2	1	A0A0G2K7Q7	N-Term(TMT10); K11(TMT10)	0	0.98436	2	0.379336	1.04276	2	3.03602	0.968462	2	3.22049	1.02203	2	3.86265	0.92953	2	0.303001	1.07998	2	1.8095	0.952413	2	0.10389	0.964973	2	0.491359	1.08811	2	0.802366	0	2.014e-08	80.9	2.92213e-07	2	1616.96	3.13047	82.873	0
High	vAEAIQAAVQEQQR	1	1	1	Q6AY97	N-Term(TMT10)	0	0.953154	1		0.929593	1		1.06295	1		1.0639	1		0.95185	1		1.04889	1		0.984087	1		1.01927	1		0.944098	1		0	6.151e-11	80.9	2.20683e-07	2	1769.97	1.41861	81.2396	0
High	sNcNVAIINVGAPAAGMNAAVR	1	2	1	P47860	N-Term(TMT10); C3(Carbamidomethyl)	0	0.796765	1		0.816729	1		1.09573	1		1.03136	1		1.06586	1		1.01581	1		1.19237	1		1.07733	1		0.800441	1		0	3.373e-14	80.89	1.95122e-07	2	2399.25	0.490219	77.6606	0
High	hIMGQNVADYMR	2	2	1	P09895	N-Term(TMT10)	0	0.961798	2	6.79054	0.960285	2	2.58257	1.07182	2	3.41402	1.08097	2	0.939474	0.957979	2	2.64398	1.04194	2	7.34005	0.990752	2	5.75842	0.993132	2	4.53947	0.888311	2	0.633987	0	9.977e-09	80.88	8.65577e-08	2	1663.83	2.32927	64.1607	0
High	tMEAVQGLLEQGR	2	1	1	P12785	N-Term(TMT10)	0	1.13654	2	1.80514	1.12682	2	7.84438	0.972611	2	0.285653	0.885955	2	4.87962	1.06234	2	2.27262	0.874087	2	3.05236	1.10631	2	0.98177	1.07536	2	1.30858	0.884747	2	1.79802	0	6.893e-10	80.86	2.15752e-07	2	1660.89	0.533977	84.2893	0
High	eLEVLSEQYSQk	2	4	1	A0A0G2JUR5	N-Term(TMT10); K12(TMT10)	0	1.0252	2	10.6761	1.04565	2	11.2371	0.990829	2	10.9277	0.988757	2	0.0764392	0.997879	2	2.67297	0.964465	2	2.09769	1.02012	2	9.34904	1.01455	2	7.68676	0.994736	2	15.3242	0	3.63e-10	80.86	2.08779e-07	2	1911.05	-0.0860366	79.6946	0
High	tEEVSAIEIVGGATR	2	1	1	Q66HA8	N-Term(TMT10)	0	0.96232	2	0.494835	0.882413	2	1.09922	1.00063	2	0.152342	1.02236	2	2.41447	1.0841	2	0.696867	1.00103	2	4.10948	1.07628	2	1.03045	1.07301	2	0.500742	0.875985	2	1.00256	0	8.56e-12	80.85	2.20361e-07	2	1760.96	1.68232	79.7275	0
High	lTFDSSFSPNTGk	5	1	1	Q9Z2L0	N-Term(TMT10); K13(TMT10)	0	1.0256	5	5.43855	1.01713	5	4.2931	0.977543	5	2.53968	1.03143	5	1.71785	0.986115	5	2.16484	1.02906	5	3.20534	1.02103	5	5.57343	0.986249	5	7.50712	0.985365	5	7.85527	0	6.113e-10	80.85	2.12961e-07	2	1859	1.18707	80.0931	0
High	gTPIPDSSSALGSGEFTGVk	2	2	1	A0A0G2QC53	N-Term(TMT10); K20(TMT10)	0	0.96084	2	1.80112	1.00431	2	7.39214	0.989918	2	5.02572	0.999611	2	5.44115	0.979638	2	4.63892	0.992679	2	8.84718	1.01062	2	3.70953	1.02465	2	6.47428	1.07293	2	1.6758	0	9.2e-13	80.85	2.43795e-07	2	2365.27	2.45993	79.4197	0
High	rEDLVVAPAGVTLk	4	2	1	E9PU28	N-Term(TMT10); K14(TMT10)	0	0.878729	4	5.71052	0.925127	4	1.45032	1.03709	4	0.906892	1.03174	4	1.65175	1.01477	4	2.37219	1.04676	4	1.95539	0.978484	4	6.8189	1.02078	4	6.69539	0.974988	4	9.41677	0	5.543e-11	80.84	1.50405e-07	2	1926.18	1.63491	71.5013	1
High	dVSTTLNADEAVAR	2	1	1	Q66HA8	N-Term(TMT10)	0	1.0231	2	9.08945	0.960682	2	13.3238	0.991546	2	2.89135	1.00323	2	4.95304	1.03381	2	6.32135	0.957718	2	1.53637	1.0358	2	5.77533	1.05436	2	9.95006	0.966092	2	5.36425	0	1.921e-11	80.81	1.53522e-07	2	1690.88	-0.189527	63.9358	0
High	gGPGSAVSPYPSFNPSSDVAALHk	8	1	1	P07150	N-Term(TMT10); K24(TMT10)	0	1.17881	8	3.37935	1.24179	8	8.06381	0.800291	8	7.73866	0.994611	8	2.49395	0.781748	8	19.5699	1.06097	8	6.28772	0.806008	8	13.5586	0.812652	8	9.07803	1.63196	8	11.902	0	1.504e-10	80.77	2.39115e-07	3	2800.47	1.59847	79.2096	0
High	vNNSSLIGLGYTQTLkPGIk	4	1	1	Q9Z2L0	N-Term(TMT10); K16(TMT10); K20(TMT10)	0	0.952632	4	1.92495	1.05164	4	2.25427	1.04783	4	0.741548	1.12212	4	4.20541	0.899195	4	3.87119	1.10833	4	1.78707	0.923204	4	0.745516	0.892838	4	0.806343	0.989276	4	0.707818	0	6.146e-14	80.76	9.15011e-08	3	2790.68	1.9263	82.9414	0
High	vVDALGNAIDGk	5	3	1	F1LP05	N-Term(TMT10); K12(TMT10)	0	0.970355	5	4.76912	1.00687	5	1.56312	0.993645	5	1.99375	1.00687	5	2.3421	0.991022	5	0.824176	1.06095	5	1.95459	0.981559	5	2.289	0.990342	5	8.56497	1.03162	5	0.903627	0	7.789e-09	80.75	2.23811e-07	2	1629.96	0.988254	83.8964	0
High	eSMQMQVEAER	3	1	1	Q4FZT0	N-Term(TMT10)	0	0.960872	3	8.50831	0.895291	3	0.84036	1.02521	3	1.27667	1.0334	3	3.78949	1.01907	3	4.87937	0.993211	3	7.40194	1.0146	3	9.31004	1.0839	3	2.70528	0.845947	3	6.42488	0	2.06e-08	80.74	4.55401e-08	2	1566.75	1.0037	56.8948	0
High	tVMALGSLAVTk	2	2	1	P31232	N-Term(TMT10); K12(TMT10)	0	0.895013	2	0.321201	0.973331	2	2.29384	1.04953	2	1.13659	1.01303	2	4.08619	1.06683	2	2.06292	0.984245	2	4.76717	1.06552	2	1.29977	1.06144	2	4.00898	0.861415	2	3.87998	0	8.282e-09	80.74	3.22997e-07	2	1649.01	0.810924	84.6893	0
High	sLLDASEEAIkk	4	3	1	P85972	N-Term(TMT10); K11(TMT10); K12(TMT10)	0	1.21892	4	3.60911	1.24099	4	2.36529	0.906255	4	3.74905	0.908705	4	0.358848	0.939103	4	1.88155	0.939787	4	1.66419	0.881109	4	0.774864	0.938023	4	2.57792	1.2586	4	1.42113	0	2.969e-09	80.72	2.09689e-07	2	1991.2	1.11808	78.7569	1
High	lGQALTEVYAk	2	3	1	Q3KRF2	N-Term(TMT10); K11(TMT10)	0	1.1974	2	3.61861	1.22113	2	1.83009	0.914729	2	3.47929	0.954489	2	3.08674	0.950226	2	2.11749	0.914297	2	3.5338	0.94487	2	2.12848	0.954063	2	4.02511	1.13204	2	2.63112	0	1.61e-08	80.7	2.51937e-07	2	1650.99	1.96878	83.2921	0
High	lVQTAAQQVAEDk	1	2	1	A0A0G2K3R7	N-Term(TMT10); K13(TMT10)	0	1.02776	1		1.05591	1		0.964912	1		0.98025	1		1.03076	1		1.02177	1		0.98091	1		1.00371	1		0.987325	1		0	4.103e-10	80.69	2.60196e-07	2	1859.07	2.67874	75.469	0
High	vFDkDGNGYISAAELR	4	1	1	P0DP29	N-Term(TMT10); K4(TMT10)	0	1.06688	4	3.2562	1.07914	4	1.36284	0.849994	4	1.61302	0.909181	4	2.28936	1.07549	4	2.90278	0.924086	4	0.84897	1.0463	4	5.16955	1.07282	4	4.52384	1.09103	4	5.14421	0	1.382e-12	80.69	2.61475e-07	2	2213.2	1.14362	76.8256	1
High	rPSPEDDLTDDENGDIQLQAQR	1	2	1	A0A0G2K0B4	N-Term(TMT10)	0	1.13057	1		1.15056	1		0.926128	1		0.975115	1		0.854774	1		0.979323	1		1.03461	1		0.986781	1		1.09066	1		0	1.552e-12	80.66	7.73112e-08	3	2741.32	1.08288	64.179	0
High	qLQAETEPIVk	2	2	1	A0A0G2K273	N-Term(TMT10); K11(TMT10)	0	0.992759	2	9.60128	0.959848	2	9.21658	1.01192	2	2.29474	1.03396	2	5.08595	0.989268	2	0.378168	1.03223	2	3.91619	0.989252	2	2.09177	1.01337	2	3.6771	0.972536	2	0.997318	0	2.712e-08	80.65	2.14818e-07	2	1714.02	2.36131	64.2847	0
High	kMDEADASSAVk	2	1	1	I6L9G6	N-Term(TMT10); K1(TMT10); K12(TMT10)	0	1.06159	2	0.637618	1.06505	2	5.1789	0.962479	2	3.89727	1.01088	2	0.0836796	0.971507	2	4.35237	0.989855	2	1.80123	0.923116	2	3.09892	0.939784	2	7.74179	1.16559	2	2.46941	0	8.043e-11	80.64	2.73564e-07	3	1939.08	2.71183	54.8504	1
High	sAEVDSDDTGGSAAQk	3	1	1	Q2PQA9	N-Term(TMT10); K16(TMT10)	0	0.9746	3	4.74691	1.1564	3	8.15547	0.948579	3	16.4857	0.983258	3	3.85933	0.927931	3	24.8516	1.0066	3	8.22482	1.00761	3	7.48201	1.09109	3	1.30023	1.08527	3	14.0178	0	3.728e-10	80.62	9.49323e-08	2	1995.98	-1.8784	46.2461	0
High	aSVPTIQDQASAMQLSQcAk	3	2	1	G3V852	N-Term(TMT10); C18(Carbamidomethyl); K20(TMT10)	0	1.11093	3	0.471257	1.14477	3	1.30552	1.01635	3	0.89003	1.00892	3	6.56052	0.823167	3	0.0167983	1.01991	3	1.12384	0.924576	3	3.28603	0.875249	3	8.72256	1.16032	3	6.52109	0	1.345e-11	80.61	2.01599e-07	3	2592.36	2.10161	77.5203	0
High	gFAFVQYVNER	2	4	1	A0A0G2K7B3	N-Term(TMT10)	0	1.09819	2	0.332305	1.09933	2	0.566733	0.916436	2	2.88558	1.00498	2	1.67219	0.923595	2	3.31875	1.04279	2	2.0248	0.895395	2	1.31621	0.95211	2	3.27973	1.17261	2	2.08361	0	4.616e-08	80.6	1.59386e-07	2	1558.83	2.49788	85.1287	0
High	sEMEVQDAELk	2	1	1	Q6AYD3	N-Term(TMT10); K11(TMT10)	0	0.816575	2	18.0328	0.787034	2	8.82648	1.12588	2	10.1482	1.0376	2	6.22785	1.11323	2	13.1095	0.952293	2	14.3442	1.13215	2	12.0466	1.10921	2	9.66311	0.792438	2	16.1619	0	4.733e-08	80.6	1.93354e-07	2	1736.92	1.73673	64.7476	0
High	yAPSGFYIASGDISGk	2	1	1	Q5RKI0	N-Term(TMT10); K16(TMT10)	0	1.02149	2	2.11876	0.990829	2	3.33259	0.913788	2	0.0474054	1.07842	2	1.74801	0.94716	2	0.652401	1.12912	2	0.813832	0.899071	2	3.15703	0.996907	2	1.00411	1.03382	2	2.42853	0	1.955e-12	80.59	2.54035e-07	2	2091.12	1.71456	84.6176	0
High	qkANEEDEQEEGGDGASGDPk	4	1	1	Q62785	N-Term(TMT10); K2(TMT10); K21(TMT10)	0	1.06065	4	3.56327	0.905534	4	3.19686	1.07551	4	1.6264	0.878036	4	2.445	1.03584	4	9.98895	0.952659	4	9.64891	0.97696	4	11.455	1.03893	4	18.6077	0.956772	4	15.5333	0	9.495e-12	80.58	1.1681e-07	4	2877.4	2.19532	44.5259	1
High	aALEAQNALHNMk	2	1	1	Q4QQT3	N-Term(TMT10); K13(TMT10)	0	0.970937	2	9.46703	1.03809	2	0.444732	1.00584	2	5.1108	0.972508	2	1.03121	1.00428	2	4.55474	0.991401	2	4.2744	1.01501	2	3.43428	1.02193	2	5.69962	1.01829	2	4.40311	0	1.172e-10	80.57	2.574e-07	2	1869.05	2.37815	66.4917	0
High	nVLLLGEDGAGk	2	2	1	G3V7G0	N-Term(TMT10); K12(TMT10)	0	0.901525	2	9.22032	0.893471	2	11.4979	1.10724	2	11.6333	0.954882	2	3.25013	1.16981	2	9.75242	0.841844	2	13.1534	1.22788	2	7.71557	1.09789	2	7.32545	0.761454	2	19.3481	0	8.027e-09	80.55	2.37002e-07	2	1643.98	2.30118	79.8681	0
High	lEGDNVNPESQLIQQNEQSESEk	1	2	1	D3ZC84	N-Term(TMT10); K23(TMT10)	0	0.946575	1		1.04197	1		1.0036	1		0.926478	1		1.0264	1		0.995187	1		1.03153	1		1.03272	1		1.05	1		0	5.306e-13	80.54	1.9207e-07	3	3073.54	2.57919	74.9031	0
High	vTETQAQVDELk	1	1	1	Q9JHW5	N-Term(TMT10); K12(TMT10)	0	0.890156	1		0.868	1		1.04224	1		1.04803	1		1.01533	1		1.07184	1		1.02798	1		1.05485	1		0.915057	1		0	2.449e-09	80.53	3.00939e-07	2	1819.03	2.16646	65.1311	0
High	tWNDPSVQQDIk	1	1	1	P06761	N-Term(TMT10); K12(TMT10)	0	0.903069	1		0.894151	1		1.10555	1		1.05485	1		1.00414	1		1.04405	1		1.08106	1		0.973722	1		0.860725	1		0	3.298e-08	80.49	2.1484e-07	2	1889.02	1.90581	68.9814	0
High	sAWGQQPDLAANEAQLLR	2	1	1	B0BN93	N-Term(TMT10)	0	0.872592	2	1.3326	0.88359	2	0.77958	1.06176	2	3.60761	0.986695	2	0.461765	1.11386	2	4.53614	0.964001	2	3.01572	1.13128	2	1.93729	1.16166	2	4.50523	0.766918	2	5.95135	0	6.515e-10	80.49	2.55932e-07	2	2197.16	1.62319	83.3202	0
High	dNAPFVVQIVk	2	2	1	A0A0U5JAB7	N-Term(TMT10); K11(TMT10)	0	1.01758	2	2.75886	0.997262	2	5.84119	1.03428	2	0.899529	1.03559	2	1.09954	0.974457	2	12.0735	1.03117	2	3.56864	0.973998	2	1.88951	0.953381	2	4.94804	0.98462	2	4.85658	0	3.482e-08	80.48	2.09515e-07	2	1688.02	2.62872	85.6593	0
High	vTLSFPSTLQTGTGTLk	1	2	1	F1M9V7	N-Term(TMT10); K17(TMT10)	0	1.01877	1		0.971463	1		1.02495	1		0.975196	1		1.00012	1		1.02092	1		1.00103	1		0.951951	1		1.07308	1		0	7.94e-13	80.48	2.86517e-07	2	2209.29	1.76635	87.2515	0
High	gHVFEESQVAGTPMFVVk	6	2	1	P05197	N-Term(TMT10); K18(TMT10)	0	1.04319	6	1.84769	1.11512	6	7.24468	0.881997	6	10.9072	1.0801	6	1.13322	0.861944	6	5.5625	1.12598	6	2.92807	0.827755	6	6.88291	0.849185	6	5.67863	1.27186	6	14.4299	0	3.913e-12	80.48	2.73534e-07	2	2420.31	1.33362	80.6771	0
High	iLYSQcGDVMR	3	4	1	A0A0G2K6J5	N-Term(TMT10); C6(Carbamidomethyl)	0	1.05152	3	0.549751	0.988173	3	0.14266	1.02963	3	0.392147	1.02478	3	2.48656	0.983638	3	2.17686	1.05661	3	0.225955	0.961194	3	12.7513	1.02479	3	2.07437	0.965142	3	2.93385	0	6.031e-08	80.47	9.96146e-08	2	1570.79	1.91761	69.1301	0
High	sVcTEAGMFAIR	2	2	1	G3V7L6	N-Term(TMT10); C3(Carbamidomethyl)	0	0.935413	2	2.17822	0.96799	2	3.13886	1.04971	2	1.50885	1.01815	2	3.31112	1.02999	2	1.8866	1.04324	2	4.84919	1.02134	2	2.14095	1.02144	2	2.38187	0.876488	2	2.3727	0	1.697e-09	80.47	9.96146e-08	2	1570.8	1.98259	77.4013	0
High	mEEFkDQLPADEcNk	6	2	1	F1M953	N-Term(TMT10); K5(TMT10); C13(Carbamidomethyl); K15(TMT10)	0	0.744171	6	9.08781	0.770499	6	0.874725	1.18135	6	2.4612	1.26187	6	4.52098	0.950388	6	1.14248	1.2133	6	3.43826	0.929912	6	2.85387	0.949771	6	4.51951	0.751595	6	3.34983	0	2.015e-12	80.46	1.6056e-07	2	2541.29	0.16821	72.0123	1
High	sEDILDYGPFk	1	2	1	P07153	N-Term(TMT10); K11(TMT10)	0	1.01338	1		1.08304	1		0.980581	1		0.982807	1		0.975436	1		1.04913	1		0.950403	1		0.949537	1		1.0735	1		0	4.883e-08	80.41	2.21109e-07	2	1741.94	2.10603	87.4267	0
High	eVYMGNVIQGGEGQAPTR	1	1	1	P17764	N-Term(TMT10)	0	0.973583	1		0.939665	1		1.0654	1		1.00713	1		0.957523	1		1.08613	1		0.941846	1		0.957217	1		1.05692	1		0	1.788e-10	80.41	1.48771e-07	2	2135.08	1.54448	68.659	0
High	iAELMPGASGAEVk	1	1	1	P62198	N-Term(TMT10); K14(TMT10)	0	0.921575	1		0.933657	1		1.03786	1		1.02469	1		1.04264	1		0.968103	1		1.10524	1		1.02717	1		0.925419	1		0	1.496e-10	80.4	3.20116e-07	2	1831.04	1.22806	81.7026	0
High	gITFDSGGISIk	2	1	1	Q68FS4	N-Term(TMT10); K12(TMT10)	0	0.918766	2	1.73803	0.944298	2	8.05709	0.992307	2	2.69958	1.03724	2	2.14168	0.990694	2	2.57347	1.06484	2	4.03992	1.02056	2	1.21287	1.02647	2	3.0647	0.982222	2	6.60598	0	2.017e-09	80.38	2.43257e-07	2	1652.97	1.79939	83.8312	0
High	lQAQTSEGDPGTEGEEGTTTVR	1	2	1	G3V656	N-Term(TMT10)	0	1.03425	1		1.0507	1		1.01172	1		0.926443	1		0.822348	1		1.11481	1		0.914929	1		0.983124	1		1.20704	1		0	7.256e-11	80.38	8.01693e-08	3	2492.2	1.74252	54.6782	0
High	tIGTGLVTDVPAMTEEDk	3	1	1	P85834	N-Term(TMT10); K18(TMT10)	0	0.873515	3	11.9656	0.853017	3	9.15102	1.04646	3	1.2953	1.0408	3	3.16447	1.10887	3	2.41518	1.03907	3	3.72446	1.09736	3	4.93109	1.08026	3	5.23203	0.786903	3	6.14605	0	2.128e-12	80.37	2.85601e-07	2	2335.25	0.342958	85.5733	0
High	lLTEcPAMMDTEYTk	1	1	1	D3ZPR0	N-Term(TMT10); C5(Carbamidomethyl); K15(TMT10)	0	1.09418	1		1.17421	1		0.979285	1		1.02236	1		0.866401	1		1.0319	1		0.851815	1		0.860411	1		1.23016	1		0	3.449e-11	80.35	1.31928e-07	2	2261.13	2.32555	84.8497	0
High	lYGSGGPPPTGEEDTSEkDEL	8	1	1	P06761	N-Term(TMT10); K18(TMT10)	0	0.944349	8	4.32041	0.949188	8	3.25586	1.01732	8	1.41979	1.06387	8	1.54948	0.980947	8	4.00821	1.07948	8	3.44208	0.993166	8	4.33401	1.00217	8	4.39906	0.932048	8	4.99385	0	3.443e-12	80.34	1.36855e-07	2	2636.3	1.33368	73.9221	1
High	vSHLLGINVTDFTR	2	2	1	G3V6P7	N-Term(TMT10)	0	0.887417	2	2.77642	0.867968	2	10.1794	0.9916	2	17.6467	1.06601	2	0.653315	1.00926	2	14.7606	1.04246	2	3.24622	0.989845	2	9.18404	1.04134	2	10.1698	1.05709	2	0.199916	0	2.318e-08	80.33	2.51634e-07	3	1801.02	1.17981	85.0713	0
High	tQAVVcQQLDLTHLk	3	1	1	D3ZD23	N-Term(TMT10); C6(Carbamidomethyl); K15(TMT10)	0	0.922605	3	2.7554	0.917445	3	3.47498	1.05141	3	0.78329	0.99439	3	0.958434	1.03226	3	1.94979	1.05582	3	1.35656	1.03315	3	0.451234	1.05731	3	4.17298	0.909577	3	1.09007	0	1.007e-10	80.29	2.72203e-07	3	2212.26	2.38005	76.3971	0
High	eNAEVDGDDDAEEMEAk	4	1	1	P68101	N-Term(TMT10); K17(TMT10)	0	0.915303	4	3.3881	0.903282	4	1.64222	1.03273	4	2.34481	1.08709	4	2.66509	1.00933	4	1.47528	1.03631	4	2.17006	1.01573	4	4.81716	1.01385	4	6.4883	0.911931	4	1.06459	0	1.593e-09	80.26	2.49601e-08	3	2325.05	1.6307	60.1248	0
High	yGPIADVSIVYDQQSR	1	1	1	P62997	N-Term(TMT10)	0	1.01255	1		1.11373	1		0.955345	1		1.04523	1		0.941473	1		1.00534	1		0.966964	1		1.00608	1		1.0083	1		0	5.522e-12	80.2	1.81926e-07	2	2040.06	1.97011	84.8663	0
High	vIQcFAETGQVQk	3	2	1	F1M779	N-Term(TMT10); C4(Carbamidomethyl); K13(TMT10)	0	1.06739	3	11.671	1.15373	3	7.46472	1.07298	3	0.637478	1.07986	3	6.1446	0.83739	3	14.2282	1.07994	3	0.864335	0.796969	3	2.73171	0.836478	3	12.9985	1.15584	3	0.0611525	0	4.207e-10	80.19	3.38368e-07	2	1966.09	1.87803	75.5583	0
High	qYTSPEEIDAQLQAEk	8	1	1	Q62785	N-Term(TMT10); K16(TMT10)	0	0.964823	8	5.44432	0.987363	8	8.98534	0.975796	8	1.89475	0.995163	8	1.4206	1.00738	8	3.07566	1.06748	8	4.40262	1.02931	8	4.53542	1.0252	8	3.16229	0.955431	8	4.8001	0	7.772e-10	80.16	2.3903e-07	2	2308.21	0.730728	80.0648	0
High	kLEAAAAALAAk	7	2	1	P50878	N-Term(TMT10); K1(TMT10); K12(TMT10)	0	0.970768	7	3.4214	0.991152	7	4.74224	1.03866	7	3.43951	1.04478	7	3.89532	1.00878	7	2.3785	1.07482	7	5.85671	0.984311	7	3.51262	0.97756	7	4.57013	0.948278	7	1.97722	0	6.424e-09	80.15	9.99863e-08	2	1815.17	1.28026	77.578	1
High	vQAHAAAALINFTEDcPk	4	2	1	D4A781	N-Term(TMT10); C16(Carbamidomethyl); K18(TMT10)	0	0.844145	4	3.21298	0.856616	4	2.31413	1.07086	4	1.17146	1.11208	4	0.71317	0.995206	4	0.661873	1.14675	4	1.26771	0.984917	4	2.46092	0.997641	4	2.29521	0.863274	4	4.72888	0	7.833e-14	80.15	2.874e-07	2	2414.29	0.506238	81.2032	0
High	dNLTLWTSDMQGDGEEQNk	3	1	1	P62260	N-Term(TMT10); K19(TMT10)	0	0.940416	3	1.64623	1.0227	3	2.12836	0.957622	3	2.19198	0.979449	3	1.97735	1.04574	3	2.18234	0.992227	3	0.91833	1.05964	3	0.948954	1.07428	3	8.51134	0.963722	3	3.67131	0	3.454e-13	80.15	7.39029e-08	2	2639.27	0.232588	84.5637	0
High	lGAAPEEESAYVAGER	1	2	1	O35987	N-Term(TMT10)	0	0.960184	1		0.955479	1		1.00306	1		1.06848	1		0.966261	1		1.11707	1		0.992235	1		1.0299	1		0.852845	1		0	1.136e-12	80.14	1.55893e-07	2	1877.94	-1.33297	64.751	0
High	iSMPDVDLNLk	2	2	1	A0A0G2JUA5	N-Term(TMT10); K11(TMT10)	0	1.17341	2	6.35249	1.26603	2	0.349824	0.872195	2	1.3483	0.961131	2	1.36168	0.882995	2	4.5922	1.00421	2	8.57184	0.851418	2	5.8382	0.901771	2	7.45534	1.28052	2	2.21252	0	6.609e-08	80.13	3.32885e-07	2	1702.98	0.965673	87.6582	0
High	tEQGPQVDETQFk	2	2	2	P11884;F1LN88	N-Term(TMT10); K13(TMT10)	0																												0	3.382e-10	80.09	2.40465e-07	2	1965.04	1.49156	61.0755	0
High	iVVYNQPYTDYGk	4	1	1	Q6IRK9	N-Term(TMT10); K13(TMT10)	0	1.05661	4	9.96181	1.10929	4	10.0986	0.909631	4	7.92243	1.05346	4	2.74239	0.918491	4	8.50467	1.04472	4	0.982221	0.894086	4	14.9012	0.906436	4	5.35937	1.15028	4	15.4397	0	4.238e-10	80.09	2.89439e-07	2	2018.11	2.83093	77.6426	0
High	sYETWIGVYTAk	1	1	1	Q5XII0	N-Term(TMT10); K12(TMT10)	0	1.10143	1		1.08982	1		0.948408	1		1.00481	1		0.864739	1		1.06267	1		0.920087	1		0.940849	1		1.15649	1		0	1.986e-09	80.08	2.94524e-07	2	1876.03	2.78572	86.924	0
High	mLTAQDMSYDEAR	1	4	1	A0A0G2JZY6	N-Term(TMT10)	0	1.04171	1		1.02035	1		0.993351	1		0.971352	1		1.03802	1		0.978532	1		0.99398	1		1.03064	1		0.987667	1		0	4.567e-10	80.06	4.29032e-08	2	1759.82	2.12086	68.9269	0
High	gAAGALLVYDITR	1	3	1	F1LP82	N-Term(TMT10)	0	1.0548	1		1.08077	1		0.95643	1		0.997688	1		0.92571	1		1.07348	1		0.910327	1		0.929934	1		1.14462	1		0	1.008e-09	80.05	3.37097e-07	2	1548.9	2.15998	86.9984	0
High	sQIHDIVLVGGSTR	4	6	1	P63018	N-Term(TMT10)	0	1.21433	4	9.71239	1.16728	4	16.8595	0.823939	4	11.1462	0.955681	4	4.00528	0.83625	4	10.5105	1.04151	4	2.77945	0.82523	4	21.6697	0.861725	4	10.4801	1.39419	4	21.651	0	7.26e-11	80.05	2.81738e-07	2	1710.97	2.54214	65.5698	0
High	mEGSGSLGLEESGSR	2	1	1	B1WC70	N-Term(TMT10)	0	1.00371	2	11.7474	1.04972	2	17.0219	1.03155	2	1.98789	0.987426	2	3.06052	0.962791	2	11.429	0.971431	2	10.4998	1.00967	2	1.74966	1.0568	2	1.59525	0.946192	2	2.33638	0	4.438e-12	80.05	5.73361e-08	2	1724.83	-0.359839	63.3615	0
High	lGLAPQIQDLYGk	1	1	1	G3V7Q7	N-Term(TMT10); K13(TMT10)	0	1.02071	1		1.00432	1		1.02044	1		1.0713	1		0.970218	1		1.04336	1		0.891575	1		0.933573	1		1.05848	1		0	4.851e-10	80.05	2.46644e-07	2	1874.12	1.72908	87.8253	0
High	tPAVEGLTEVEEEELR	2	1	1	Q6PCT3	N-Term(TMT10)	0	0.979279	2	5.81338	0.972899	2	4.06749	1.02574	2	1.0091	1.00421	2	0.829104	1.02575	2	5.51812	1.01954	2	4.38973	1.02047	2	3.48	1.00903	2	0.969755	0.941559	2	4.60666	0	1.499e-11	79.98	1.90877e-07	2	2030.05	0.986064	84.9451	0
High	vLQEDTLPDLQMk	1	2	1	Q6GT74	N-Term(TMT10); K13(TMT10)	0	0.790039	1		0.813241	1		1.10231	1		1.06077	1		1.10361	1		1.10902	1		1.06863	1		1.02627	1		0.781064	1		0	7.101e-10	79.97	3.23225e-07	2	1988.12	1.54702	86.6567	0
High	kQTIENSQGAYQEAFDISk	4	1	1	P68255	N-Term(TMT10); K1(TMT10); K19(TMT10)	0	1.06349	4	1.65463	1.05566	4	4.5487	0.927009	4	4.37442	1.02854	4	2.16296	0.964667	4	5.10304	1.03923	4	0.277677	0.962963	4	7.09431	0.944278	4	4.05028	1.09232	4	5.82509	0	8.443e-16	79.96	3.19429e-07	2	2844.54	0.510843	74.6234	1
High	vAGQDGSVVQFk	3	3	1	F1M2K3	N-Term(TMT10); K12(TMT10)	0	1.03532	3	5.9297	1.08713	3	7.23001	0.99432	3	2.56068	0.982797	3	0.618878	0.96502	3	0.464289	0.985343	3	2.1391	1.04433	3	3.4431	0.93962	3	6.91791	1.02787	3	12.6342	0	4.602e-08	79.94	3.28507e-07	2	1692.97	2.45045	67.8423	0
High	dTEMLATGAQDGk	1	2	1	G3V702	N-Term(TMT10); K13(TMT10)	0	1.04997	1		1.03776	1		0.99754	1		1.00659	1		0.992097	1		1.01948	1		0.986948	1		0.956086	1		0.995775	1		0	3.387e-10	79.92	1.88439e-07	2	1794.93	0.186438	60.7515	0
High	tVETEAVQMLk	1	2	1	F1MAA3	N-Term(TMT10); K11(TMT10)	0	1.09852	1		1.11017	1		0.922212	1		0.91449	1		1.06221	1		0.88631	1		1.08362	1		1.03227	1		1.03605	1		0	1.84e-08	79.89	3.42568e-07	2	1706.98	1.87143	81.3967	0
High	vDIDVPNVDAQGPELHmk	2	2	1	A0A0G2JUA5	N-Term(TMT10); M17(Oxidation); K18(TMT10)	0	1.05091	2	5.78645	0.978811	2	0.429403	0.972931	2	3.05526	0.979508	2	2.47476	0.983123	2	0.597483	0.994374	2	0.589755	1.01036	2	2.6586	1.03524	2	0.449498	1.05374	2	3.49613	0	2.446e-10	79.88	2.7191e-07	3	2451.3	2.99403	74.4646	0
High	hFIEQGINVcLcQSYAk	2	1	1	P00507	N-Term(TMT10); C10(Carbamidomethyl); C12(Carbamidomethyl); K17(TMT10)	0	1.01879	2	0.738161	1.01526	2	1.37336	0.986336	2	4.18521	1.06853	2	2.03831	0.87377	2	8.80999	1.10072	2	4.52201	0.909087	2	2.52381	0.944968	2	0.790735	1.09555	2	0.696285	0	6.158e-11	79.88	2.4364e-07	3	2525.31	2.81405	78.9273	0
High	dAEDDGEEDDD	8	1	1	Q5XIE0	N-Term(TMT10)	0	1.22672	8	34.1089	1.01843	8	33.998	0.951845	7	18.6409	0.995196	8	13.5707	0.927534	8	33.9447	0.890207	8	18.7164	0.988336	8	8.15961	1.06389	6	15.113	1.1642	8	33.4844	0	9.606e-07	79.87	1.02795e-08	2	1453.53	0.163074	36.2553	0
High	lSScDVLTSAIk	2	2	1	A0A0G2JZI2	N-Term(TMT10); C4(Carbamidomethyl); K12(TMT10)	0	0.83305	2	5.54514	0.820777	2	1.91707	1.13612	2	0.166892	1.13201	2	3.22049	1.01194	2	0.833259	1.1278	2	0.934108	0.988912	2	5.15431	0.977324	2	0.326002	0.809401	2	3.53096	0	3.977e-09	79.86	3.57335e-07	2	1752	1.98002	82.1785	0
High	dELHIVEAEAMNYEGSPIk	5	3	1	P13084	N-Term(TMT10); K19(TMT10)	0	0.855633	5	2.27049	0.820627	5	0.685605	1.02882	5	0.254506	1.02686	5	1.20456	1.01239	5	0.894101	1.10595	5	2.63866	1.05192	5	1.62824	1.06074	5	1.90056	0.947915	5	2.35925	0	5.956e-13	79.85	2.33942e-07	2	2603.35	0.842379	86.3715	0
High	yQcTcLDGAVGcVPLcSMDVR	1	3	1	Q9R1E9	N-Term(TMT10); C3(Carbamidomethyl); C5(Carbamidomethyl); C12(Carbamidomethyl); C16(Carbamidomethyl)	0	1.09977	1		1.06068	1		0.984588	1		0.942917	1		0.950921	1		0.949172	1		1.00829	1		0.980747	1		1.1382	1		0	4.017e-14	79.85	2.22556e-08	2	2690.21	0.667009	84.1438	0
High	gLELIASENFcSR	1	1	1	Q5U3Z7	N-Term(TMT10); C11(Carbamidomethyl)	0	0.768003	1		0.792837	1		1.13239	1		1.05254	1		1.06128	1		1.13961	1		1.0253	1		1.0387	1		0.830394	1		0	3.229e-10	79.82	1.65207e-07	2	1724.89	2.40701	84.8558	0
High	sPGGPGPLTLk	1	1	1	D4A7U1	N-Term(TMT10); K11(TMT10)	0	1.04817	1		1.0495	1		0.972049	1		1.01609	1		0.990717	1		0.964532	1		0.97659	1		1.00382	1		1.04949	1		0	4.424e-08	79.81	2.46032e-07	2	1481.91	1.63532	66.9844	0
High	sIQESTGGIIEVLHk	1	2	1	P97852	N-Term(TMT10); K15(TMT10)	0	1.00245	1		1.05579	1		0.985014	1		0.992161	1		0.929131	1		1.10751	1		0.940944	1		0.864618	1		1.17196	1		0	5.324e-10	79.81	3.20729e-07	3	2069.2	0.960083	81.2726	0
High	aLAAAGYDVEk	7	4	3	P15865;A0A0G2K654;M0R7B4	N-Term(TMT10); K11(TMT10)	0																												0	3.22e-07	79.77	3.51638e-07	2	1565.9	3.2634	68.8594	0
High	hAEQNGPVDGQGDNPGTQAAEHGADTAVPSDGDk	1	2	1	O88600	N-Term(TMT10); K34(TMT10)	0	0.853934	1		0.75201	1		0.970077	1		1.05587	1		1.19718	1		1.04142	1		1.08125	1		1.09615	1		0.878191	1		0	8.046e-16	79.76	5.65397e-08	4	3800.78	0.781289	53.0113	0
High	qFLEcAQNQSDVk	2	4	1	M0R785	N-Term(TMT10); C5(Carbamidomethyl); K13(TMT10)	0	0.722335	2	33.888	0.730638	2	27.3243	1.12605	2	15.3801	1.10737	2	9.53574	1.06661	2	10.4136	1.09095	2	7.05768	1.04002	2	6.71661	1.14146	2	7.26961	0.72562	2	30.7973	0	3.481e-10	79.74	2.36227e-07	2	2025.05	1.28846	66.8175	0
High	aPVDITGQFEk	2	2	2	G3V9K0;B2RYA5	N-Term(TMT10); K11(TMT10)	0																												0	1.414e-07	79.72	3.5891e-07	2	1662.95	2.39087	76.6253	0
High	aQLSQYFDAVk	1	3	1	A0A0G2JUA6	N-Term(TMT10); K11(TMT10)	0	1.05826	1		1.12679	1		0.905415	1		0.985099	1		0.927121	1		1.05218	1		0.940135	1		0.991215	1		1.11194	1		0	1.44e-08	79.69	2.91588e-07	2	1727.98	2.4186	84.6728	0
High	dLQVNVEHLVQk	3	3	1	Q52KS1	N-Term(TMT10); K12(TMT10)	0	1.03981	3	4.25994	1.06708	3	0.154363	0.987838	3	1.67937	0.995985	3	0.641276	1.00329	3	4.85283	0.980062	3	2.02948	0.993751	3	4.61229	0.974682	3	0.170444	1.06048	3	1.39756	0	1.085e-08	79.66	2.99016e-07	3	1880.1	1.42563	78.6313	0
High	sDGGYTYDTSDLAAIk	2	1	1	P40329	N-Term(TMT10); K16(TMT10)	0	0.933775	2	4.2561	0.983662	2	4.72944	1.01684	2	0.143496	1.05416	2	2.17569	0.925896	2	1.1179	1.10793	2	4.392	0.936968	2	10.7044	0.989118	2	1.95807	1.0158	2	17.8215	0	3.052e-11	79.66	2.1088e-07	2	2135.09	1.2403	78.4035	0
High	lGPVDMLVNcAGTSk	1	2	1	A0A0G2K4V4	N-Term(TMT10); C10(Carbamidomethyl); K15(TMT10)	0	1.04764	1		1.09254	1		1.01571	1		1.00288	1		0.958543	1		0.9706	1		0.96269	1		0.983913	1		1.03055	1		0	6.527e-12	79.65	3.15423e-07	2	2020.1	0.960048	86.8694	0
High	vWQLGSSSPNFTLEGHEk	1	3	2	Q5M7X1;O35142	N-Term(TMT10); K18(TMT10)	0																												0	2.197e-11	79.65	2.69898e-07	3	2474.31	1.38271	83.0813	0
High	gLTPTGMLPSGVLSGGk	2	1	1	P63329	N-Term(TMT10); K17(TMT10)	0	0.973262	2	0.755126	1.00082	2	3.45615	0.961064	2	0.369163	1.04918	2	0.0633542	0.94916	2	0.354173	1.07096	2	0.895539	0.952053	2	0.700744	0.987553	2	5.50649	1.07495	2	2.26945	0	3.376e-08	79.61	3.37486e-07	2	2030.18	2.3102	86.1417	0
High	sVGDGETVEFDVVEGEk	4	7	2	P62961;D4A0L4	N-Term(TMT10); K17(TMT10)	0																												0	1.941e-13	79.61	2.01288e-07	2	2254.15	1.30954	81.0395	0
High	nIEDVIAQGVGk	4	3	1	D4A4D5	N-Term(TMT10); K12(TMT10)	0	0.972036	4	6.89697	0.986795	4	1.51744	1.00047	4	2.08079	1.04206	4	2.62877	1.04032	4	2.15093	1.02258	4	5.272	0.996592	4	3.71383	0.9859	4	3.09031	0.984582	4	3.99974	0	1.192e-08	79.59	2.62113e-07	2	1700.99	-0.0580807	86.1488	0
High	aSAGPGGGGPQTQTQMNQLk	1	1	1	D3ZD73	N-Term(TMT10); K20(TMT10)	0	1.0197	1		1.10463	1		0.973125	1		1.00241	1		0.98247	1		0.980509	1		0.974824	1		0.993983	1		1.04042	1		0	3.001e-10	79.59	3.05524e-07	2	2386.26	0.680604	58.3076	0
High	aVTSEIAVLQSR	2	2	1	P07153	N-Term(TMT10)	0	0.999401	2	5.15146	1.00254	2	2.53899	0.962376	2	0.442241	1.00669	2	3.59874	1.00549	2	1.40118	1.00254	2	1.42517	1.00078	2	0.0976664	1.03898	2	4.80603	1.02339	2	1.85449	0	1.289e-08	79.58	3.48086e-07	2	1502.88	2.38062	74.6877	0
High	lLQNQIQQQTWTDEGTPSMR	1	4	1	A0A0G2JYN3	N-Term(TMT10)	0	0.97997	1		1.01025	1		1.00453	1		0.985924	1		0.976692	1		1.04549	1		1.03726	1		1.02053	1		0.951746	1		0	3.023e-14	79.58	1.85059e-07	2	2603.31	0.385898	80.5349	0
High	iSGDLEVLAEk	3	4	1	Q5PPH9	N-Term(TMT10); K11(TMT10)	0	1.00056	3	5.59039	0.977008	3	3.72571	1.06285	3	1.19181	1.00211	3	1.34096	1.00373	3	2.87858	1.01918	3	0.75198	0.967615	3	4.25079	0.930238	3	4.03039	1.0549	3	8.06415	0	6.125e-08	79.55	3.74901e-07	2	1631.96	1.50116	85.8323	0
High	lVNEcLAEELPHIHAFEQk	4	1	1	D4A9P7	N-Term(TMT10); C5(Carbamidomethyl); K19(TMT10)	0	0.969716	4	2.29565	1.03589	4	4.16594	1.03789	4	4.76975	1.0594	4	0.601258	0.907515	4	1.47162	1.0875	4	4.53424	0.959122	4	3.41608	0.898364	4	1.46939	1.02186	4	0.794877	0	5.939e-12	79.55	3.26652e-07	3	2735.47	3.10595	84.8811	0
High	gTNTGVWVGVSGSEASEALSR	1	1	1	P12785	N-Term(TMT10)	0	1.12708	1		1.13412	1		0.988973	1		0.924317	1		0.977063	1		0.930696	1		0.931906	1		0.948794	1		1.18606	1		0	8.532e-13	79.54	1.68983e-07	2	2293.16	1.12038	78.382	0
High	vAEDDEDDDVETkk	9	1	1	P06302	N-Term(TMT10); K13(TMT10); K14(TMT10)	0	1.24319	9	4.20011	1.1476	9	9.66928	1.03486	9	4.2927	1.02894	9	4.01604	0.825869	9	13.3245	0.995855	9	4.32071	0.811415	9	16.9135	0.842578	9	12.3574	1.20056	9	6.00378	0	2.443e-11	79.53	2.50716e-07	2	2295.18	0.933096	55.3884	1
High	kGVNLPGAAVDLPAVSEk	14	4	2	P11980;Q6P7S0	N-Term(TMT10); K1(TMT10); K18(TMT10)	0																												0	2.571e-13	79.53	1.74387e-07	2	2452.48	1.7272	78.7809	1
High	qVVDSAYEVIk	6	2	1	P04642	N-Term(TMT10); K11(TMT10)	0	0.995658	6	1.73854	0.989412	6	2.01188	0.994233	6	3.93987	1.00931	6	2.27308	1.04392	6	2.95983	1.01722	6	5.01317	0.983475	6	2.88139	0.988283	6	1.50746	0.965439	6	3.33942	0	5.581e-08	79.52	3.67448e-07	2	1708.99	1.12395	79.0595	0
High	kGFIGPGIDVPAPDMSTGER	5	1	1	P10860	N-Term(TMT10); K1(TMT10)	0	0.98898	5	1.37971	1.00456	5	4.9659	0.972716	5	3.33998	1.02727	5	3.44309	0.982902	5	1.39301	1.05676	5	3.09027	0.946591	5	1.96423	0.992139	5	2.82452	1.02256	5	0.911611	0	1.206e-12	79.51	3.65496e-07	3	2502.34	0.419562	78.9909	1
High	vIGSGcNLDSAR	2	3	2	P04642;P42123	N-Term(TMT10); C6(Carbamidomethyl)	0																												0	5.329e-09	79.48	1.74152e-07	2	1477.77	1.48812	59.8828	0
High	eVSDGIVAPGYEEEALk	2	1	1	O35567	N-Term(TMT10); K17(TMT10)	0	0.899593	2	5.4874	0.896679	2	0.1584	1.02356	2	0.387904	1.06738	2	6.63066	1.0561	2	4.69133	1.08738	2	0.174189	0.967166	2	0.976107	0.978796	2	3.88197	0.965881	2	4.9125	0	3.101e-10	79.47	3.28206e-07	2	2264.21	1.63555	80.4352	0
High	vEEAEPEEFVVEk	2	3	1	Q5RJK5	N-Term(TMT10); K13(TMT10)	0	1.22105	2	4.1279	1.24676	2	4.94445	0.883673	2	2.72474	0.954604	2	3.3497	0.896981	2	0.856643	0.990455	2	5.31302	0.894959	2	1.78035	0.896231	2	0.37809	1.20818	2	2.94682	0	3.375e-10	79.46	2.85365e-07	2	1992.06	2.29924	79.9194	0
High	vAGYAAQLEQYQk	2	1	1	P54921	N-Term(TMT10); K13(TMT10)	0	1.03222	2	6.17458	1.05853	2	6.34822	0.934576	2	1.02231	1.03173	2	1.97985	0.946613	2	3.24226	1.05011	2	0.116139	0.946849	2	0.327852	0.975041	2	7.29754	1.07948	2	3.77886	0	9.873e-11	79.43	2.59977e-07	2	1927.07	1.28871	80.5543	0
High	nYMSNPSYNYEIVNR	1	3	1	F1LRT9	N-Term(TMT10)	0	0.899425	1		0.9808	1		1.00302	1		1.01441	1		1.03606	1		0.964565	1		1.12362	1		1.11407	1		0.853883	1		0	4.017e-12	79.43	6.3854e-08	2	2093	1.47049	70.5274	0
High	gSGGGGGDGEEGDGGEEGDGEEGDEGDGDER	1	1	1	D4A3E1	N-Term(TMT10)	0				2.11424	1		0.872291	1					1.13937	1		1.21985	1		1.27684	1		1.33868	1		1.32412	1		0	2.632e-12	79.43	1.13755e-08	3	3069.15	2.54178	36.4106	0
High	qAHLcVLASNcDEPMYVk	4	3	1	Q6PDW1	N-Term(TMT10); C5(Carbamidomethyl); C11(Carbamidomethyl); K18(TMT10)	0	1.09294	4	2.05508	1.14887	4	7.28039	0.924632	4	0.666435	1.07543	4	3.93046	0.850202	4	0.638642	1.10958	4	4.7211	0.810536	4	7.1119	0.843438	4	2.34489	1.23993	4	2.32788	0	1.662e-14	79.39	2.05418e-07	2	2593.3	1.45296	72.4484	0
High	vYMLEGDTQVADVTTSR	2	1	1	P12785	N-Term(TMT10)	0	1.19039	2	2.90732	1.23749	2	0.957898	0.901271	2	3.27607	0.916694	2	1.58795	0.904276	2	2.76926	0.946392	2	0.746572	0.927898	2	1.19249	0.941055	2	10.8876	1.23608	2	11.0257	0	2.782e-11	79.37	2.01742e-07	2	2114.07	1.60968	82.1206	0
High	sPcYVDkDcDLDVAcR	11	1	1	P11883	N-Term(TMT10); C3(Carbamidomethyl); K7(TMT10); C9(Carbamidomethyl); C15(Carbamidomethyl)	0	1.21304	11	10.0092	1.27922	11	5.93756	0.945403	11	3.30632	1.02289	11	1.87384	0.781587	11	2.89272	1.03793	11	3.57936	0.741802	11	10.5255	0.807454	11	17.3305	1.30581	11	7.81148	0	9.242e-10	79.37	6.53203e-08	2	2431.15	0.540056	65.2703	1
High	dASLMVTNDGATILk	3	1	1	Q5XIM9	N-Term(TMT10); K15(TMT10)	0	0.86798	3	0.726441	0.874165	3	0.79961	1.03064	3	1.01103	0.996923	3	0.845277	1.09529	3	1.86509	1.03036	3	0.668616	1.03555	3	2.2939	1.06963	3	2.26722	0.929032	3	6.52719	0	3.472e-09	79.35	3.83859e-07	3	2007.12	0.72424	82.2401	0
High	hEEMAQAFEDWNk	3	3	1	P85968	N-Term(TMT10); K13(TMT10)	0	0.761558	3	4.9557	0.782928	3	1.46756	1.11555	3	3.07184	1.07775	3	1.32154	1.09633	3	3.88315	1.07783	3	3.7001	1.10968	3	2.94757	1.12212	3	0.412275	0.714094	3	3.7108	0	1.354e-10	79.33	1.03846e-07	2	2093.02	2.25435	75.8846	0
High	aSAEQIEEEVTk	3	1	1	Q4QQV4	N-Term(TMT10); K12(TMT10)	0	0.926896	3	2.61425	0.988521	3	6.00139	0.987024	3	5.17437	1.00088	3	0.153067	0.998395	3	1.86382	1.03165	3	3.4565	1.00127	3	2.6279	1.04298	3	3.22561	1.00313	3	4.60228	0	1.444e-09	79.32	3.71316e-07	2	1791.98	1.40337	74.1966	0
High	qPTVTSVcSESAQELAEGQR	2	1	1	Q62920	N-Term(TMT10); C8(Carbamidomethyl)	0	0.902787	2	19.0826	0.838029	2	18.4314	1.09202	2	5.25312	0.932918	2	2.33349	1.08326	2	18.4626	0.960141	2	6.04742	1.12303	2	14.7595	1.13426	2	9.3718	0.849546	2	33.1329	0	1.22e-11	79.31	1.55902e-07	3	2406.18	1.71937	65.5462	0
High	lQEVPHEGPMcDLLWSDPDDR	1	3	1	A0A0G2JYA4	N-Term(TMT10); C11(Carbamidomethyl)	0	1.05293	1		1.036	1		1.00219	1		1.05506	1		0.941244	1		0.983055	1		0.923883	1		0.905965	1		1.16774	1		0	9.354e-14	79.31	7.85371e-08	3	2738.28	1.04959	87.0289	0
High	ecPSDEcGAGVFMGSHFDR	4	2	1	P62982	N-Term(TMT10); C2(Carbamidomethyl); C7(Carbamidomethyl)	0	1.03174	4	1.88052	1.06594	4	3.69239	1.03679	4	7.724	1.08648	4	4.59712	0.894471	4	2.57256	1.07177	4	6.59297	0.91128	4	6.59897	0.896992	4	5.05919	1.04113	4	1.29798	0	5.325e-12	79.29	1.58977e-08	3	2387.01	2.22997	68.9786	0
High	vSAQcLSEIEMAk	2	3	1	Q9Z1E1	N-Term(TMT10); C5(Carbamidomethyl); K13(TMT10)	0	1.03744	2	14.2237	1.14609	2	10.4968	0.973788	2	4.0188	0.982242	2	2.72378	0.936752	2	5.77016	0.997818	2	2.34863	0.957164	2	5.2995	0.960531	2	9.44606	1.08834	2	2.60462	0	3.069e-10	79.28	2.9626e-07	2	1924.03	2.23133	81.6233	0
High	vADGLPLAASMQEDEQSGR	1	1	1	Q4KM74	N-Term(TMT10)	0	0.997322	1		0.944536	1		0.991888	1		0.993963	1		0.994888	1		1.01965	1		1.04237	1		1.03922	1		0.996174	1		0	2.276e-11	79.28	1.42819e-07	2	2203.09	1.61049	79.3817	0
High	dHPAVAATLNNLAVLYGk	2	4	1	A0A140TAB3	N-Term(TMT10); K18(TMT10)	0	1.00684	2	8.70462	1.0801	2	2.98209	0.915912	2	3.61333	0.998659	2	3.89196	1.00608	2	7.80129	1.04805	2	1.66148	0.935629	2	2.09494	0.986427	2	7.26507	1.08915	2	0.0647196	0	2.68e-12	79.25	3.02474e-07	2	2325.33	0.582693	87.3027	0
High	vTVLFAGQHIAk	4	1	1	C0JPT7	N-Term(TMT10); K12(TMT10)	0	0.912735	4	6.55945	0.929407	4	4.98858	1.00498	4	2.42804	1.10867	4	3.47918	0.958862	4	4.69844	1.04381	4	2.6073	0.986304	4	6.40345	0.952144	4	2.85232	1.00642	4	3.98641	0	3.004e-09	79.18	2.54245e-07	2	1742.07	0.892723	76.2119	0
High	lAPGFNAEMIVk	1	1	1	Q66H94	N-Term(TMT10); K12(TMT10)	0	1.17416	1		1.19981	1		0.919756	1		0.940481	1		0.928281	1		1.02108	1		0.893509	1		0.923675	1		1.1544	1		0	3.521e-09	79.18	4.5293e-07	2	1748.02	1.99582	86.1383	0
High	tPVQSQQPSATAPSGADEk	2	1	1	Q4FZT9	N-Term(TMT10); K19(TMT10)	0	0.943941	2	9.7635	0.996078	2	4.24783	0.988889	2	1.86732	0.984107	2	12.5023	1.00975	2	0.445704	1.0139	2	7.18573	0.979026	2	0.489843	0.973232	2	9.28786	1.14328	2	16.317	0	2.428e-10	79.17	2.85701e-07	3	2357.24	0.303572	51.6917	0
High	vDIDVPDVNIEGPDAk	7	5	1	A0A0G2JUA5	N-Term(TMT10); K16(TMT10)	0	1.24902	5	2.08499	1.26556	5	3.44687	0.902716	5	0.154437	0.949508	5	1.07694	0.907286	5	1.03055	0.946744	5	5.05344	0.891189	5	2.95062	0.859388	5	1.52467	1.28868	5	2.67035	0	8.62e-10	79.16	4.01025e-07	2	2154.17	0.994887	85.7965	0
High	tVIVNMVDVAk	1	1	1	Q07205	N-Term(TMT10); K11(TMT10)	0	0.809686	1		0.812439	1		1.0678	1		1.04488	1		1.03756	1		1.02572	1		1.22692	1		1.1291	1		0.729547	1		0	8.599e-08	79.12	3.78406e-07	2	1647	2.53178	85.1154	0
High	lGGSPFGPAGTGk	1	4	1	F1LRT9	N-Term(TMT10); K13(TMT10)	0	1.00446	1		0.85524	1		1.05149	1		1.03037	1		1.06101	1		1.04477	1		0.992713	1		1.01476	1		0.906361	1		0	8.7e-10	79.08	4.27638e-07	2	1603.92	1.86444	70.0165	0
High	lQMEAPHIIVGTPGR	9	1	1	Q6P3V8	N-Term(TMT10)	0	1.02724	9	6.76623	1.02938	9	2.17385	0.977286	9	3.54306	0.978992	9	3.02377	0.978404	9	4.30207	1.01529	9	2.62749	0.992804	9	6.83867	0.979513	9	4.37215	1.0748	9	7.30832	0	3.796e-09	79.08	4.32582e-07	3	1848.04	1.00044	73.8112	0
High	kPPVSVEPSLDIVSk	5	1	1	F1M853	N-Term(TMT10); K1(TMT10); K15(TMT10)	0	1.07552	5	1.94385	1.09942	5	4.37532	0.960316	5	1.79102	0.96075	5	0.366713	0.951663	5	5.50716	0.975473	5	1.45123	0.9691	5	3.80608	0.931124	5	3.60051	1.11385	5	3.05915	0	5.559e-08	79.08	1.67471e-07	3	2282.4	2.71307	77.6344	0
High	gIQQATAGVSQDTSENPNk	1	3	2	A8IRI3;P06536	N-Term(TMT10); K19(TMT10)	0																												0	1.076e-10	79.07	2.94834e-07	3	2403.25	1.31931	57.5779	0
High	iIFVVGGPGSGk	3	2	1	P39069	N-Term(TMT10); K12(TMT10)	0	0.945413	3	0.525515	0.994829	3	3.7931	0.999578	3	3.69222	1.05759	3	2.18229	0.993164	3	3.94206	1.00758	3	1.49998	1.04958	3	1.03097	0.995661	3	0.453519	0.931835	3	0.768022	0	1.803e-06	79.06	3.01101e-07	2	1588.99	1.58704	84.8067	0
High	nNLAGAEELFAR	2	2	1	F1M779	N-Term(TMT10)	0	0.973289	2	0.902843	0.879693	2	1.10296	1.05892	2	1.93869	0.92653	2	0.21731	1.14274	2	3.59653	0.843809	2	2.20202	1.21544	2	2.18102	1.15944	2	0.466543	0.817208	2	3.55901	0	4.469e-09	79.04	2.80038e-07	2	1533.82	1.5721	81.7733	0
High	aEEEGGSDGSAAEAEPR	1	1	1	Q4G061	N-Term(TMT10)	0	1.12133	1		1.24754	1		0.92086	1		0.966968	1		0.724004	1		1.10761	1		1.00042	1		0.846646	1		1.19612	1		0	1.059e-06	78.99	2.77602e-08	2	1890.85	0.218425	39.0096	0
High	nETGGGEGVEVLVNEPYEkDDGEk	2	2	1	P16446	N-Term(TMT10); K19(TMT10); K24(TMT10)	0	0.978409	2	0.874499	0.969387	2	0.498195	0.993602	2	4.89199	0.996414	2	1.66088	1.06316	2	2.14446	1.00245	2	2.31605	1.04859	2	0.407323	1.03876	2	1.73634	0.918619	2	7.15813	0	9.948e-17	78.98	2.95316e-07	3	3251.66	1.47998	73.6078	1
High	iMVDMLDEDGSGk	2	1	1	Q07009	N-Term(TMT10); K13(TMT10)	0	1.01437	2	7.41563	1.03259	2	5.83029	0.964221	2	3.96943	1.0006	2	0.181399	0.969579	2	6.65719	1.02844	2	1.79815	0.967912	2	7.93742	0.975383	2	4.60174	1.10123	2	0.677537	0	1.939e-09	78.96	2.34421e-07	2	1867.96	1.95093	87.3573	0
High	gGTPPQQQQQQQQQPGASPPAAPGPk	9	1	1	P13264	N-Term(TMT10); K26(TMT10)	0	0.926967	9	12.5137	0.85289	9	6.4323	0.940251	9	8.42393	0.927709	9	6.98054	1.0497	9	22.5676	0.91538	9	10.1402	1.04828	9	16.899	1.0447	9	5.4872	0.914811	9	29.2534	0	1.046e-10	78.92	3.80211e-07	3	3066.61	0.372117	50.4002	0
High	vNEAAPEkPQEDSGTAGGISSTSASVNR	1	3	1	A0A0G2JU89	N-Term(TMT10); K8(TMT10)	0	0.885124	1		0.956059	1		1.04088	1		1.0819	1		1.03123	1		1.07645	1		1.06428	1		0.901742	1		0.90032	1		0	3.791e-16	78.92	2.98142e-07	3	3217.63	0.280778	56.2593	0
High	yVVVTGITPTPLGEGk	2	4	1	G3V6S5	N-Term(TMT10); K16(TMT10)	0	1.02685	2	7.50204	0.998582	2	3.03969	0.979763	2	1.03141	1.07288	2	1.49887	0.959827	2	6.50195	1.04641	2	1.55171	0.93444	2	1.64253	0.953988	2	2.46387	1.04639	2	0.687657	0	1.159e-09	78.91	3.44457e-07	2	2089.24	2.58009	84.2364	0
High	ekLPGELEPVQAAQNk	1	1	1	Q5RK09	N-Term(TMT10); K2(TMT10); K16(TMT10)	0	1.07232	1		1.02761	1		0.957558	1		1.04101	1		0.960163	1		1.03307	1		0.969302	1		0.948552	1		1.04188	1		0	6.197e-13	78.9	3.23351e-07	3	2438.43	1.72631	66.7183	1
High	tMSTSDPVEVLIk	2	1	1	Q9Z1W6	N-Term(TMT10); K13(TMT10)	0	0.893457	2	6.47177	0.91948	2	2.61137	0.9726	2	2.50149	1.00593	2	1.8324	1.10623	2	0.68237	0.942192	2	0.990274	1.12831	2	3.44485	1.07908	2	4.11936	0.962947	2	5.59828	0	4.802e-10	78.88	4.41321e-07	2	1878.07	1.20738	84.6298	0
High	aMADPEVQQIMSDPAMR	4	1	1	O35814	N-Term(TMT10)	0	0.947321	4	2.27018	0.960404	4	3.23903	0.994648	4	2.2533	1.02194	4	1.96168	1.01914	4	1.93707	1.0527	4	0.863144	1.0264	4	4.31344	0.98359	4	1.39739	1.02012	4	7.09111	0	5.977e-12	78.87	1.38798e-07	2	2119.02	1.32822	84.3828	0
High	yFHVVIAGPQDSPFEGGTFk	1	1	1	Q9EQX9	N-Term(TMT10); K20(TMT10)	0	0.907483	1		0.980046	1		0.975462	1		1.07119	1		0.955319	1		1.06905	1		0.91254	1		1.00747	1		1.12475	1		0	9.205e-12	78.87	4.138e-07	2	2654.4	0.888777	86.9587	0
High	qAALQVADGFISR	2	1	1	Q6AYC4	N-Term(TMT10)	0	0.89568	2	0.335471	0.856997	2	0.803483	1.05435	2	3.8428	0.999778	2	9.12718	1.07162	2	0.84901	1.01486	2	4.32153	1.05965	2	5.13714	1.02709	2	0.888974	0.981558	2	8.41429	0	2.854e-09	78.84	3.71606e-07	2	1604.9	1.64608	82.3029	0
High	aMLESIGVPLEk	2	2	1	Q4KM49	N-Term(TMT10); K12(TMT10)	0	0.706415	2	6.31631	0.71776	2	5.98662	1.08673	2	6.85511	1.01874	2	18.1077	1.23994	2	21.242	1.20018	2	4.78396	1.07084	2	1.78194	0.970358	2	10.4955	0.772134	2	10.9414	0	1.621e-08	78.84	3.71606e-07	2	1745.03	2.0829	87.5508	0
High	mTGSEFDFEEMkR	3	1	1	P50399	N-Term(TMT10); K12(TMT10)	0	1.00061	3	1.0099	0.99819	3	2.57101	1.01036	3	4.23717	1.0049	3	0.0484416	1.02542	3	1.61138	0.970652	3	1.58267	1.07444	3	1.10398	1.0109	3	5.50515	0.943511	3	0.374171	0	2.537e-10	78.84	1.37801e-07	2	2065.02	3.73969	76.9794	1
High	aLIVLAHAER	5	1	1	P05982	N-Term(TMT10)	0	0.797505	5	13.0702	0.705643	5	12.0927	1.09136	5	6.09647	1.12498	5	12.3612	1.07737	5	3.11329	1.0732	5	3.33085	1.12742	5	2.94481	1.06165	5	1.79027	0.769994	5	3.13625	0	8.791e-06	78.81	4.59013e-07	3	1321.82	1.23083	64.6501	0
High	tGQAAELGGLLk	3	4	1	F1LMZ8	N-Term(TMT10); K12(TMT10)	0	1.0036	3	8.49545	0.939845	3	1.15829	1.02965	3	2.32479	0.991294	3	3.03237	1.0922	3	2.90891	0.942138	3	4.85889	1.04451	3	14.4831	1.0427	3	2.62548	0.947725	3	14.5785	0	3.731e-09	78.81	3.78785e-07	2	1615.98	2.21902	78.895	0
High	aTDAEADVASLNR	4	8	3	A0A0G2JX64;P58775;Q5FVG5	N-Term(TMT10)	0																												0	1.433e-09	78.79	1.88285e-07	2	1561.8	1.20201	60.4721	0
High	qSELSVAEQEQALR	1	1	1	P86182	N-Term(TMT10)	0	0.911342	1		0.908657	1		1.06812	1		0.923925	1		1.07278	1		0.978341	1		1.12936	1		1.13831	1		0.848276	1		0	1.957e-11	78.78	2.99301e-07	2	1816.96	0.447929	63.0001	0
High	tQAcLcYIcAGNVER	1	3	1	A0A0G2K0X9	N-Term(TMT10); C4(Carbamidomethyl); C6(Carbamidomethyl); C9(Carbamidomethyl)	0	1.09742	1		1.11572	1		1.04464	1		1.00992	1		1.00423	1		0.901643	1		0.942276	1		1.01613	1		0.940098	1		0	3.214e-12	78.78	7.87983e-08	2	2043.96	1.60954	67.9746	0
High	vLIEGSINSVR	3	1	1	B2RZ72	N-Term(TMT10)	0	1.05352	3	2.11171	1.07041	3	5.43557	0.972517	3	1.93235	1.00097	3	2.93321	0.981805	3	6.96197	1.02653	3	1.00233	0.97991	3	3.54315	1.00502	3	3.58512	0.951307	3	1.88393	0	2.356e-07	78.77	3.48441e-07	2	1415.84	1.87082	73.2008	0
High	lQTQASATVPIPk	2	3	1	Q3KRF2	N-Term(TMT10); K13(TMT10)	0	1.09329	2	1.45968	1.05082	2	3.48987	0.963196	2	0.56672	0.94021	2	3.58788	1.04966	2	3.70686	0.923064	2	0.515081	1.02624	2	2.78154	1.03236	2	3.40287	1.02635	2	2.61765	0	1.649e-09	78.77	2.56851e-07	2	1812.1	1.86941	69.795	0
High	qPAPTTSGGLNk	2	2	2	A0A0G2JW88;Q5M7W5	N-Term(TMT10); K12(TMT10)	0																												0	1.577e-06	78.76	4.17763e-07	2	1628.94	3.33299	52.3964	0
High	tLMNLGGLAVAR	2	1	1	Q5XFX0	N-Term(TMT10)	0	0.919964	2	1.58398	0.892416	2	3.55044	1.11274	2	1.73745	0.989333	2	1.56336	1.13209	2	4.33238	0.890894	2	1.45024	1.19279	2	2.12559	1.08206	2	1.94457	0.744097	2	0.657263	0	6.811e-08	78.73	3.36259e-07	2	1444.85	0.635961	85.8676	0
High	aPSEAPQSEQQALDTLQR	3	1	1	Q5U2Z4	N-Term(TMT10)	0	0.819614	3	0.415822	0.792655	3	10.7923	1.15711	3	2.65144	1.03853	3	7.27482	1.04912	3	3.2737	1.02766	3	13.2975	1.04147	3	16.8315	1.07092	3	2.53081	0.75518	3	2.92322	0	3.358e-13	78.72	2.49754e-07	2	2198.13	1.17821	66.5711	0
High	dTVQLETLELPQDcVR	2	1	1	Q5U2V1	N-Term(TMT10); C14(Carbamidomethyl)	0	1.0682	2	12.7673	1.13292	2	9.01068	1.02149	2	6.04498	1.01007	2	0.264274	0.962796	2	7.40515	1.0351	2	1.3294	0.881801	2	3.14541	0.905815	2	6.90206	1.02954	2	3.65547	0	4.861e-10	78.7	2.75863e-07	2	2145.11	1.82908	83.5591	0
High	aVLLAGPPGTGk	1	1	1	P60123	N-Term(TMT10); K12(TMT10)	0	0.994248	1		0.983389	1		0.977287	1		1.08346	1		0.958018	1		1.027	1		0.966512	1		0.96066	1		1.06919	1		0	1.138e-06	78.68	2.20896e-07	2	1538.97	2.13078	70.3654	0
High	vAAAESMPLLLEcAR	1	1	1	D4A781	N-Term(TMT10); C13(Carbamidomethyl)	0	1.05164	1		0.926543	1		1.1333	1		1.10108	1		0.837459	1		1.10885	1		0.908218	1		0.890687	1		0.983202	1		0	6.926e-11	78.68	3.66579e-07	2	1859.99	1.42004	87.5524	0
High	vTADVINAAEk	1	1	1	O08651	N-Term(TMT10); K11(TMT10)	0	0.686945	1		0.667473	1		1.1255	1		1.13036	1		1.13654	1		1.14912	1		1.11681	1		1.05613	1		0.694487	1		0	6.487e-08	78.67	4.0274e-07	2	1588.93	1.51924	71.0897	0
High	wDVSGISVASVEk	2	5	2	A0A0G2K174;Q6J0M8	N-Term(TMT10); K13(TMT10)	0																												0	1.536e-10	78.66	4.71741e-07	2	1835.03	1.19001	86.4117	0
High	dGPPGPAGNSGSPGNPGVAGPk	1	1	1	P13941	N-Term(TMT10); K22(TMT10)	0	1.20692	1		1.2262	1		0.941114	1		0.995704	1		0.873224	1		0.976975	1		0.874384	1		0.912553	1		1.15133	1		0	2.949e-11	78.64	3.39197e-07	3	2345.23	2.71366	55.0128	0
High	vDATEQTDLAk	5	2	1	G3V6T7	N-Term(TMT10); K11(TMT10)	0	1.09932	5	15.3412	1.13743	5	10.5781	0.993506	5	1.7021	0.976459	5	0.581316	0.966956	5	5.92792	0.916023	5	1.21245	0.912022	5	8.22577	0.917366	5	9.69775	1.12603	5	22.0446	0	2.684e-08	78.62	4.46564e-07	2	1648.92	1.46471	61.5918	0
High	hQAFEAEVQANSGAIVk	3	6	1	Q6IRK8	N-Term(TMT10); K17(TMT10)	0	1.06539	3	0.192126	1.02951	3	0.0574156	0.975336	3	0.787617	0.915265	3	0.334354	1.00437	3	3.22915	0.956002	3	7.2372	1.0863	3	4.03036	1.01049	3	2.11201	1.07812	3	8.55626	0	7.303e-14	78.62	4.21144e-07	2	2257.24	1.72751	67.5439	0
High	fQGPTcETcQTcLGVcAEHk	4	2	1	A0A0G2JSK5	N-Term(TMT10); C6(Carbamidomethyl); C9(Carbamidomethyl); C12(Carbamidomethyl); C16(Carbamidomethyl); K20(TMT10)	0	1.14988	4	8.58699	1.15852	4	11.2137	0.915072	4	1.48382	0.968714	4	4.98293	0.923662	4	5.40353	0.933479	4	2.21673	0.948907	4	2.97111	0.980241	4	2.80701	1.10959	4	6.15173	0	3.771e-13	78.61	6.74833e-08	3	2841.33	2.05085	66.2401	0
High	aNDDLAQEIAk	1	3	1	Q5BJN4	N-Term(TMT10); K11(TMT10)	0	0.980773	1		0.981276	1		1.00426	1		1.03563	1		0.97102	1		1.02636	1		0.959295	1		1.05965	1		0.988325	1		0	9.833e-08	78.6	4.07213e-07	2	1645.92	2.96661	67.8241	0
High	aLTTQLIEQTk	3	2	1	P24155	N-Term(TMT10); K11(TMT10)	0	0.939262	3	0.52633	0.933361	3	1.41832	1.01665	3	1.93127	1.0386	3	0.74374	1.02511	3	1.57223	1.05073	3	0.35977	1.02145	3	4.44359	1.01005	3	1.55302	0.945613	3	3.6792	0	4.707e-08	78.58	4.86751e-07	2	1704.03	1.93653	77.3946	0
High	dLNTMAPGLTIQAVR	2	1	1	B1WBY7	N-Term(TMT10)	0	0.971275	2	3.95643	0.952124	2	1.58476	1.0013	2	0.900428	1.05103	2	3.03674	0.982285	2	4.30428	1.04793	2	3.19413	1.00543	2	4.26906	1.04401	2	0.565984	0.923868	2	2.74935	0	4.873e-11	78.56	4.15161e-07	2	1829.02	1.79276	83.4235	0
High	vcMDLNNTVPEYk	2	2	1	Q9JKB7	N-Term(TMT10); C2(Carbamidomethyl); K13(TMT10)	0	0.906739	2	0.408802	0.933982	2	0.262715	1.05775	2	2.23152	1.11836	2	0.433281	0.948282	2	1.25097	1.10482	2	2.68061	0.9562	2	1.38065	0.948479	2	0.076554	0.950408	2	0.369162	0	4.534e-09	78.56	2.3614e-07	2	2041.05	-1.3486	78.4399	0
High	vSGPDLDLNLk	4	2	1	A0A0G2JUA5	N-Term(TMT10); K11(TMT10)	0	1.22253	4	1.88974	1.24384	4	2.25255	0.906064	4	1.30539	0.941565	4	1.53938	0.962771	4	2.3543	0.909078	4	2.43742	0.901082	4	4.48728	0.915909	4	2.62381	1.20221	4	0.575808	0	1.333e-07	78.54	3.78588e-07	2	1628.97	2.05071	82.863	0
High	qLSNEELEQFQk	3	2	1	A0A0G2JVL8	N-Term(TMT10); K12(TMT10)	0	0.809252	3	6.86281	0.789228	3	4.46698	1.03177	3	2.22807	1.07997	3	0.569997	1.0794	3	1.7401	1.09102	3	3.99077	1.05085	3	0.731912	1.10482	3	2.90473	0.811633	3	2.21128	0	1.7e-09	78.54	4.45069e-07	2	1951.06	2.88995	74.4315	0
High	sEAELAAALGDk	1	1	1	D3ZLC1	N-Term(TMT10); K12(TMT10)	0	1.17904	1		1.18673	1		0.92132	1		0.977606	1		0.924689	1		0.960521	1		0.914428	1		0.942094	1		1.15393	1		0	8.563e-09	78.53	4.72748e-07	2	1632.92	1.2713	80.4009	0
High	hELLQPFNVLYEk	3	2	1	Q6AYD3	N-Term(TMT10); K13(TMT10)	0	0.894386	3	2.52924	0.845412	3	2.35577	1.05757	3	0.124667	1.04631	3	3.5663	1.0297	3	6.18999	1.00924	3	0.365456	1.06593	3	5.63626	1.07902	3	5.92274	0.872046	3	1.29152	0	6.583e-10	78.52	4.71729e-07	2	2088.2	3.65568	87.4174	0
High	kPGPGAQELAEEEAR	1	1	1	D4ABT9	N-Term(TMT10); K1(TMT10)	0	1.0689	1		1.10149	1		0.983386	1		0.963585	1		0.987581	1		0.930467	1		0.947298	1		1.01952	1		1.10909	1		0	5.784e-11	78.47	3.31403e-07	3	2040.11	0.308857	55.9811	0
High	vALSNMNVIDR	1	2	1	F1M9V7	N-Term(TMT10)	0	1.02868	1		1.10916	1		0.980206	1		1.03866	1		0.99992	1		1.02639	1		0.967089	1		0.95817	1		0.925658	1		0	4.325e-08	78.46	3.82063e-07	2	1460.81	1.36472	74.3454	0
High	fcGVEAAVSEMTR	1	1	1	Q5M819	N-Term(TMT10); C2(Carbamidomethyl)	0	0.672951	1		0.687032	1		1.22238	1		1.08814	1		1.1195	1		1.17697	1		1.12063	1		1.01517	1		0.627546	1		0	6.056e-10	78.46	9.90797e-08	2	1685.82	1.35678	87.8964	0
High	lGcGEGGcGAcTVMISk	1	2	1	F1LQS6	N-Term(TMT10); C3(Carbamidomethyl); C8(Carbamidomethyl); C11(Carbamidomethyl); K17(TMT10)	0	1.20565	1		1.13755	1		0.977498	1		1.0044	1		0.878467	1		0.983634	1		0.910667	1		0.885565	1		1.14593	1		0	2.585e-13	78.44	1.33193e-07	2	2215.08	1.77846	71.6527	0
High	vEGEIkVPEVDIk	9	5	1	A0A0G2JUA5	N-Term(TMT10); K6(TMT10); K13(TMT10)	0	1.41817	9	10.4276	1.44081	9	5.66668	0.89439	9	2.83483	0.920844	9	2.47021	0.752572	9	8.6621	0.889243	9	3.87718	0.750553	9	6.184	0.77033	9	7.35903	1.48332	9	7.91257	0	2.291e-09	78.42	2.34524e-07	2	2142.3	1.43876	78.4019	1
High	fTATAGIQVVGDDLTVTNPk	3	2	1	M0R5J4	N-Term(TMT10); K20(TMT10)	0	0.814243	3	1.40461	0.902651	3	0.3002	1.05561	3	7.95869	1.04385	3	0.532248	1.07324	3	7.39254	1.01255	3	0.610364	1.04994	3	2.62331	1.03738	3	0.251391	0.88618	3	1.77053	0	2.625e-14	78.42	4.53222e-07	2	2505.4	1.15206	87.8633	0
High	eAFSDGITSVk	1	1	1	P49088	N-Term(TMT10); K11(TMT10)	0	0.628189	1		0.632953	1		1.12772	1		1.19783	1		1.13114	1		1.15598	1		1.09816	1		1.10278	1		0.644652	1		0	3.957e-08	78.38	4.09495e-07	2	1611.9	2.49685	70.5141	0
High	eLDPTNMTYITNQAAVHFEk	1	1	1	O35814	N-Term(TMT10); K20(TMT10)	0	1.01243	1		1.02746	1		0.985597	1		1.01545	1		0.904934	1		1.14558	1		0.874595	1		0.884033	1		1.18255	1		0	1.766e-11	78.23	3.5399e-07	3	2780.44	2.45579	87.4306	0
High	sEEMQTVQQEQILQETQALQk	2	12	1	Q6S3A0	N-Term(TMT10); K21(TMT10)	0	0.989477	2	5.54078	1.02542	2	13.9296	1.00839	2	1.64293	1.02343	2	4.56122	0.99506	2	6.0565	0.995017	2	1.89436	0.950406	2	10.9644	1.0093	2	2.43228	1.02225	2	15.0765	0	1.25e-12	78.23	4.32153e-07	3	2947.55	0.516871	83.7807	0
High	gDYQTSPLLETQAEDHPPR	2	2	1	E9PU64	N-Term(TMT10)	0	0.918154	2	1.1365	1.09345	2	19.9769	0.987915	2	7.93448	1.03082	2	3.01737	0.944776	2	3.3642	1.00872	2	6.54348	1.06493	2	6.31477	0.980414	2	9.34934	0.978034	2	6.94097	0	4.096e-11	78.22	2.23731e-07	3	2383.18	1.59265	61.3451	0
High	dLGTDSQIFISR	2	1	1	P50399	N-Term(TMT10)	0	1.01396	2	8.26791	1.07228	2	0.290941	1.0011	2	2.57369	0.979093	2	0.906206	1.00554	2	2.89145	0.993943	2	0.213496	0.998916	2	1.31496	1.00132	2	1.15574	0.982365	2	3.62129	0	1.669e-08	78.21	4.34148e-07	2	1580.85	2.61202	76.6667	0
High	gVVEVTHDLQk	8	2	2	P29457;Q5RJR9	N-Term(TMT10); K11(TMT10)	0																												0	7.657e-08	78.21	3.66194e-07	2	1682.99	3.61658	65.1794	0
High	kDTQTVHSNALNEDTQDELGDPR	1	1	1	Q99068	N-Term(TMT10); K1(TMT10)	0	1.03993	1		0.928547	1		0.850994	1		1.07572	1		1.05909	1		0.988706	1		0.984537	1		0.942663	1		1.21944	1		0	1.575e-11	78.2	2.64873e-07	4	3041.52	1.9283	55.6151	1
High	kQELEEIcHDLEAR	8	2	1	G3V6P7	N-Term(TMT10); K1(TMT10); C8(Carbamidomethyl)	0	1.19472	8	5.18437	1.21822	8	9.55459	1.01649	8	4.06823	1.09427	8	1.28458	0.75022	8	4.92801	1.09235	8	4.41105	0.745277	8	5.2954	0.771206	8	6.00847	1.19895	8	2.19065	0	1.454e-08	78.19	3.83814e-07	4	2228.18	0.914267	78.4002	1
High	aAGSGELAVTVk	3	2	1	D4A8D5	N-Term(TMT10); K12(TMT10)	0	1.01433	3	0.620509	0.983371	3	0.309329	1.01306	3	2.69962	1.04963	3	4.4857	0.950398	3	2.79785	1.05017	3	4.23841	0.946071	3	1.12514	0.952227	3	6.60858	0.998791	3	5.53898	0	5.064e-09	78.18	4.7137e-07	2	1560.94	1.57017	65.9339	0
High	dSVVAGFQWATk	7	2	1	P05197	N-Term(TMT10); K12(TMT10)	0	0.953509	7	1.05576	0.921275	7	4.96183	1.04336	7	2.46674	1.03115	7	5.59645	1.05271	7	5.53387	1.055	7	4.30097	1.03311	7	6.0417	0.998654	7	4.96573	0.864511	7	4.37428	0	1.049e-08	78.18	4.75931e-07	2	1766.98	0.399313	85.4897	0
High	yGPMEEPQVIEk	1	3	1	A0A0G2K398	N-Term(TMT10); K12(TMT10)	0	0.895463	1		0.902752	1		0.992299	1		1.07171	1		1.02535	1		1.08434	1		1.0268	1		1.04013	1		0.904395	1		0	1.614e-09	78.13	3.87615e-07	2	1878.01	-0.599334	73.7534	0
High	qATVGDVNTDRPGLLDLk	9	2	1	P11030	N-Term(TMT10); K18(TMT10)	0	1.09293	9	5.93149	1.11645	9	2.76273	0.945062	9	3.6292	0.934202	9	3.02735	1.01499	9	2.34692	0.955547	9	5.8098	1.00331	9	4.11489	0.977246	9	2.25473	1.06569	9	2.0391	0	2.21e-09	78.13	4.82211e-07	2	2370.34	0.827262	75.3183	0
High	vQSGSESVIQEYVDLR	2	13	1	Q6S3A0	N-Term(TMT10)	0	1.00964	2	2.2275	1.03348	2	3.92808	1.00525	2	3.60671	1.0276	2	1.39487	0.984016	2	3.98152	1.02207	2	2.82537	0.951513	2	8.61177	1.00532	2	2.82502	0.980784	2	3.09713	0	1.898e-12	78.09	3.47735e-07	2	2038.07	1.55432	86.7872	0
High	qALQDTLALYk	1	4	1	A0A0G2JZY6	N-Term(TMT10); K11(TMT10)	0	1.06562	1		1.03423	1		0.981897	1		0.988372	1		1.00978	1		0.961677	1		1.00331	1		0.979759	1		1.05255	1		0	3.881e-08	78.05	5.13894e-07	2	1722.02	2.09986	85.7668	0
High	sLSDVSAEDVQSLR	1	5	2	A0A0G2K174;Q6J0M8	N-Term(TMT10)	0																												0	7.814e-11	78.05	2.92982e-07	2	1734.91	1.45383	71.3443	0
High	iMASSPDMDQATVSALR	1	2	1	D3ZXI0	N-Term(TMT10)	0	0.726835	1		0.708962	1		1.09847	1		1.10807	1		1.15283	1		1.14495	1		1.08839	1		1.09345	1		0.664116	1		0	1.899e-09	78.05	2.49113e-07	2	2022.02	1.98712	78.1254	0
High	tDISAPGVEVHGPEWNLk	7	2	1	A0A0G2JUA5	N-Term(TMT10); K18(TMT10)	0	1.10732	7	1.01405	1.16012	7	10.2376	0.958858	7	8.74927	0.954119	7	5.13042	0.975168	7	2.07308	0.937652	7	2.41572	0.956198	7	3.2561	0.977401	7	4.05414	1.16101	7	3.44177	0	1.128e-10	78.05	4.95877e-07	3	2407.31	1.49795	78.3622	0
High	yAAVTQFEATDAR	2	2	1	F1M9V7	N-Term(TMT10)	0	1.08049	2	1.4023	1.04786	2	2.5593	0.963273	2	0.388278	1.01076	2	0.96709	1.01507	2	1.00809	0.958255	2	1.07893	0.99877	2	1.00894	1.01915	2	4.59658	0.975139	2	4.13128	0	1.192e-09	78.03	2.32949e-07	2	1671.86	0.893049	68.6227	0
High	vDFTEEEINNMk	3	1	1	G3V7Q7	N-Term(TMT10); K12(TMT10)	0	0.989501	3	8.41011	1.02724	3	3.30613	1.02771	3	0.163449	1.03278	3	2.22156	1.02075	3	1.54578	1.03988	3	2.18123	0.967427	3	10.1814	0.973303	3	3.77855	0.972774	3	5.04456	0	3.829e-09	78.02	3.04479e-07	2	1926.99	1.93967	82.0003	0
High	nIELIcQENEGENDPVLQR	2	1	1	Q66HR2	N-Term(TMT10); C6(Carbamidomethyl)	0	1.03565	2	9.2698	1.01218	2	0.0343417	1.05445	2	2.92344	0.919971	2	0.292047	1.15418	2	3.0446	0.879947	2	0.280066	1.11549	2	3.53717	1.01287	2	6.84354	0.866731	2	3.79188	0	1.361e-13	78.01	2.25328e-07	2	2499.24	1.12399	79.2	0
High	ekDDDDEDGDGDGDGAAGk	5	2	1	P38062	N-Term(TMT10); K2(TMT10); K19(TMT10)	0	0.935689	5	2.71476	0.924142	5	10.7862	1.0433	5	2.31977	0.991894	5	3.88289	0.99074	5	3.43573	0.976016	5	15.6984	1.00537	5	10.1394	1.02095	5	1.24839	0.959912	5	8.99939	0	1.464e-09	78.01	5.53437e-08	3	2568.18	-0.252886	44.2575	1
High	qAEmEGAVQSIQGELSk	1	2	1	G3V8L9	N-Term(TMT10); M4(Oxidation); K17(TMT10)	0	0.927731	1		0.952761	1		0.988432	1		0.970958	1		1.09066	1		0.930918	1		1.13479	1		1.10329	1		0.925813	1		0	7.159e-11	77.99	3.72514e-07	2	2279.19	-1.42332	74.784	0
High	aVFDETYPDPVR	1	1	1	P50475	N-Term(TMT10)	0	0.867638	1		0.90751	1		1.03678	1		1.127	1		0.979311	1		1.15326	1		0.992549	1		0.985566	1		0.835692	1		0	2.178e-07	77.94	2.35417e-07	2	1637.84	1.94671	75.1457	0
High	eQQEAIEHIDEVQNEIDR	3	4	1	Q63945	N-Term(TMT10)	0	0.928153	3	5.50862	0.934493	3	4.73984	1.04933	3	3.22004	0.997003	3	0.067999	1.03677	3	0.620771	1.01542	3	7.35465	1.10461	3	7.05726	1.02414	3	1.07181	0.905476	3	7.3015	0	2.602e-13	77.93	1.82003e-07	2	2424.19	0.405453	76.2962	0
High	aVVNEDTQGNVSQLQAEVk	2	2	1	A0A0G2K0M1	N-Term(TMT10); K19(TMT10)	0	1.20029	2	10.2308	1.16292	2	11.7678	0.916814	2	3.46033	0.998622	2	5.24681	0.880204	2	7.15563	0.994133	2	4.5686	0.870591	2	5.25613	0.889478	2	12.2179	1.23011	2	16.3639	0	1.476e-10	77.91	4.98369e-07	3	2487.35	0.915918	72.1507	0
High	wGTLTDcVVMR	2	3	1	Q6URK4	N-Term(TMT10); C7(Carbamidomethyl)	0	1.05599	2	0.211935	1.06307	2	1.54767	1.12288	2	1.70184	1.08255	2	0.872644	0.941107	2	4.45922	0.9851	2	4.62624	0.954306	2	3.06035	0.922279	2	2.48563	0.85375	2	3.10414	0	1.493e-07	77.9	2.33541e-07	2	1566.8	1.78388	83.8576	0
High	sLVEASSSGVSVLSLcEk	2	2	1	Q6AYD3	N-Term(TMT10); C16(Carbamidomethyl); K18(TMT10)	0	0.983477	2	1.39855	1.002	2	2.33072	1.081	2	1.12212	1.11283	2	1.27707	0.882132	2	2.20451	1.13478	2	0.90568	0.863062	2	3.37445	0.861957	2	1.78902	1.03114	2	0.639333	0	2.196e-13	77.9	4.82489e-07	2	2310.26	0.305607	85.9151	0
High	vLSQQAAAVVk	1	1	1	D3ZW08	N-Term(TMT10); K11(TMT10)	0	0.847814	1		0.894485	1		1.05408	1		1.00223	1		1.1001	1		1.02828	1		1.06958	1		1.06314	1		0.883896	1		0	3.153e-08	77.86	3.37184e-07	2	1571.99	1.0984	66.6736	0
High	kEAGEGAEAEGATADGAk	1	2	1	F1LMW7	N-Term(TMT10); K1(TMT10); K18(TMT10)	0	1.29917	1		1.37159	1		0.906388	1		0.831825	1		0.874613	1		0.902155	1		0.813863	1		0.820149	1		1.50691	1		0	4.536e-12	77.84	4.62068e-07	3	2349.26	2.99201	49.0705	1
High	eELTAFLHPEEFPHMR	2	2	1	I6L9G5	N-Term(TMT10)	0	1.62946	2	5.42414	1.52485	2	1.20888	0.79859	2	9.8556	0.859496	2	18.1285	0.752896	2	5.83544	0.785405	2	5.80591	0.766509	2	1.05754	0.715976	2	3.98199	1.63922	2	14.3976	0	8.667e-09	77.83	2.55465e-07	4	2212.11	2.28258	84.3389	0
High	qEATLVVGGDGR	3	3	1	Q499Q4	N-Term(TMT10)	0	0.977396	3	9.35984	0.957421	3	9.17353	1.0309	3	0.134172	0.956305	3	5.60762	1.13116	3	0.306989	0.914477	3	0.866885	1.08149	3	0.0540192	1.07224	3	1.30392	0.862603	3	2.14792	0	7.37e-09	77.82	3.2461e-07	2	1430.78	1.91588	58.2467	0
High	mDATANDITNDR	1	2	1	G3V6T7	N-Term(TMT10)	0	1.05679	1		0.990448	1		1.03323	1		1.00656	1		1.06692	1		0.919702	1		1.09685	1		0.997949	1		0.861512	1		0	4.413e-09	77.82	8.92059e-08	2	1565.75	1.83923	58.6873	0
High	tDEHVIDQGDDGDNFYVIER	1	2	1	P12368	N-Term(TMT10)	0	0.993602	1		0.940109	1		1.05142	1		0.97505	1		1.14936	1		0.88298	1		1.02629	1		1.07796	1		0.935911	1		0	2.34e-12	77.81	7.69933e-08	3	2566.2	2.2143	72.5657	0
High	aTSHVGEIEQELALAR	1	3	1	A0A0G2K681	N-Term(TMT10)	0	1.05365	1		1.10947	1		0.920588	1		0.976216	1		1.02774	1		0.977813	1		0.946553	1		0.997576	1		1.10036	1		0	8.346e-13	77.79	4.94034e-07	2	1953.06	2.31105	75.6135	0
High	iPTAcITIEDAEMMSR	1	1	1	Q6IRK9	N-Term(TMT10); C5(Carbamidomethyl)	0	1.1459	1		1.11457	1		0.981573	1		1.03206	1		0.88166	1		0.99354	1		0.973458	1		0.971452	1		0.981882	1		0	1.828e-11	77.79	2.10422e-07	2	2067.02	2.69111	87.5591	0
High	qAEMEGAVQSIQGELSk	2	2	1	G3V8L9	N-Term(TMT10); K17(TMT10)	0	1.07276	2	0.255702	1.00392	2	7.65871	0.958847	2	4.3134	0.951015	2	2.52006	0.970508	2	5.84037	1.02924	2	1.74541	0.989328	2	0.65047	0.975601	2	7.174	1.1242	2	12.2483	0	2.55e-09	77.78	4.64328e-07	3	2263.2	1.00638	86.3368	0
High	cAVVDVPFGGAk	5	1	1	P10860	N-Term(TMT10); C1(Carbamidomethyl); K12(TMT10)	0	1.08161	5	3.99697	1.06733	5	7.15982	1.0605	5	0.866271	1.00315	5	0.627577	0.969791	5	3.15817	1.00382	5	0.857701	0.969495	5	3.03663	0.934369	5	3.53192	0.975639	5	6.35438	0	1.493e-08	77.76	4.98296e-07	2	1677.94	2.812	77.9915	0
High	aSNTSEVYFDGVk	1	2	1	P45953	N-Term(TMT10); K13(TMT10)	0	0.94879	1		0.985564	1		0.974204	1		1.03128	1		1.00701	1		1.02265	1		1.0143	1		1.03264	1		0.996385	1		0	3.149e-10	77.76	3.92774e-07	2	1875	2.71973	71.0088	0
High	aLSVAVAGSGScR	3	1	1	F1M8K0	N-Term(TMT10); C12(Carbamidomethyl)	0	1.25114	3	12.8825	1.31027	3	1.99159	0.977259	3	5.68843	0.979331	3	0.974339	0.894771	3	20.1874	0.964744	3	1.57291	0.817133	3	2.29361	0.829944	3	7.25101	1.17095	3	11.5175	0	2.586e-09	77.75	3.99555e-07	2	1463.79	1.26031	58.4547	0
High	iAVSIEDEANk	2	1	1	D4AB03	N-Term(TMT10); K11(TMT10)	0	1.00631	2	14.4504	0.955259	2	22.2494	1.0152	2	14.2746	0.978253	2	2.36707	1.03984	2	10.3688	0.929158	2	7.07542	1.0722	2	12.1667	1.06142	2	7.18016	0.944534	2	19.1844	0	4.588e-08	77.72	5.77286e-07	2	1646.94	2.28904	72.6815	0
High	iLSEELISEGk	1	2	1	A0A140TAD1	N-Term(TMT10); K11(TMT10)	0	0.928241	1		0.951461	1		1.07214	1		1.04144	1		0.994108	1		1.06586	1		0.948083	1		1.02061	1		0.930925	1		0	3.569e-08	77.7	5.29003e-07	2	1675.99	1.77402	83.2508	0
High	qYPWGVVQVENENHcDFVk	1	6	2	A0A0G2JUL7;G3V9Z6	N-Term(TMT10); C15(Carbamidomethyl); K19(TMT10)	0																												0	3.706e-13	77.7	3.07382e-07	3	2806.41	1.9533	81.9954	0
High	gEAHLAVNDFDLAR	1	1	1	Q9QVC8	N-Term(TMT10)	0	0.853903	1		0.919318	1		0.961863	1		0.966904	1		1.13713	1		0.937627	1		1.16842	1		1.11149	1		0.960806	1		0	4.915e-09	77.69	3.3107e-07	2	1756.92	3.87551	70.5965	0
High	rGPNYTSGYGTNSELSNPSETESER	1	3	1	A0A0G2JWD2	N-Term(TMT10)	0	0.939618	1		0.975861	1		1.00586	1		1.03119	1		1.01082	1		1.04255	1		1.05307	1		1.06841	1		0.843043	1		0	1.195e-17	77.69	8.17036e-08	3	2961.37	0.971624	55.1219	1
High	vSMPDVELNLk	3	3	2	A0A0G2JUA5;Q38PF9	N-Term(TMT10); K11(TMT10)	0																												0	8.378e-08	77.68	5.90305e-07	2	1702.98	0.607272	85.569	0
High	iLEAHQNVAQMSLIEAk	1	2	1	Q5XI19	N-Term(TMT10); K17(TMT10)	0	1.05032	1		0.967541	1		0.993095	1		1.02329	1		0.932098	1		1.05349	1		0.944058	1		1.01292	1		1.05027	1		0	8.676e-14	77.65	5.05924e-07	2	2353.33	0.364457	80.0253	0
High	gTDIMYTGTLDcWR	2	1	1	Q09073	N-Term(TMT10); C12(Carbamidomethyl)	0	0.945156	2	0.352822	0.997482	2	0.767083	0.983102	2	3.65414	1.03857	2	0.879019	0.971522	2	1.9909	1.10225	2	4.74395	0.971729	2	0.229721	0.972576	2	4.04099	1.0066	2	7.30291	0	1.297e-10	77.63	9.66469e-08	2	1917.91	1.60518	85.4923	0
High	vDNSSLTGESEPQTR	1	5	1	P06685	N-Term(TMT10)	0	0.848427	1		1.00122	1		1.01284	1		1.05427	1		1.04958	1		1.02081	1		0.992782	1		1.10799	1		0.871816	1		0	1e-10	77.61	1.77715e-07	2	1848.91	-0.324387	52.804	0
High	qPDVILEASGPEAIQIR	2	3	1	G3V7L1	N-Term(TMT10)	0	0.937728	2	9.94787	1.13617	2	7.96128	0.821397	2	8.22385	0.849263	2	2.40194	1.16135	2	4.23433	0.905567	2	13.725	1.21893	2	0.309123	1.17466	2	0.148442	0.91984	2	6.36288	0	6.756e-09	77.6	6.29953e-07	2	2065.15	1.55342	83.4161	0
High	eEAHGEQGEEEEEEEEEDVAESR	2	1	1	Q4G017	N-Term(TMT10)	0	1.09666	2	15.4101	1.08697	2	17.9724	1.06156	2	2.50103	0.972656	2	4.50501	0.896576	2	11.8145	0.986077	2	9.0372	0.876474	2	12.8902	0.943092	2	13.4285	1.12851	2	19.2847	0	6.535e-15	77.6	1.73368e-08	3	2904.2	2.06811	52.8189	0
High	vSGGTAEFITGk	1	2	1	A0A0H2UH90	N-Term(TMT10); K12(TMT10)	0	0.877197	1		0.85625	1		1.12052	1		1.10797	1		1.00031	1		1.02596	1		1.08061	1		1.01144	1		0.809213	1		0	8.577e-09	77.59	5.06866e-07	2	1624.93	2.16169	71.3013	0
High	qILLSTEEDSGAGPPR	1	6	1	A0A0G2JU01	N-Term(TMT10)	0	1.15857	1		1.01487	1		0.924374	1		1.04145	1		0.981455	1		0.951864	1		0.917184	1		0.987666	1		1.13281	1		0	1.399e-11	77.59	4.44161e-07	2	1899	1.38759	67.2588	0
High	wLHNEDQMAVEk	4	1	1	Q9EQS0	N-Term(TMT10); K12(TMT10)	0	0.921534	4	7.75466	0.973318	4	2.46125	1.0395	4	3.26631	1.12331	4	2.89845	0.987534	4	2.95391	1.07868	4	1.38327	0.91327	4	5.06599	0.940528	4	2.6942	0.970118	4	4.90316	0	2.264e-09	77.59	3.48361e-07	2	1958.02	1.87142	68.4325	0
High	mTVPGLEDLPQHGLPR	4	1	1	P12785	N-Term(TMT10)	0	1.00495	4	6.9124	1.01197	4	5.77126	0.990506	4	1.80373	0.958174	4	5.83407	1.04226	4	4.64015	0.978712	4	4.15618	0.987379	4	4.30282	1.05357	4	4.52243	0.938006	4	1.88061	0	6.905e-09	77.58	4.77482e-07	3	1989.08	0.225024	81.2131	0
High	dGGGENTDTEAQPQPQPQPPSSNk	5	2	1	F1MAA3	N-Term(TMT10); K24(TMT10)	0	1.05844	5	8.4713	1.09694	5	14.2915	0.902921	5	7.78562	0.898749	5	8.36245	0.974882	5	12.856	0.968311	5	10.4245	0.944689	5	10.9705	1.04111	5	3.07684	1.20844	5	8.60767	0	4.228e-10	77.57	1.81984e-07	3	2937.42	-0.994527	47.9597	0
High	iEGEGSVLQAk	1	2	1	Q62667	N-Term(TMT10); K11(TMT10)	0	0.688273	1		0.804554	1		1.1857	1		1.15184	1		1.03179	1		1.17196	1		1.02428	1		0.979267	1		0.728183	1		0	7.458e-08	77.54	5.22426e-07	2	1588.93	1.67289	66.5148	0
High	sSPEGAAVVQEELR	1	2	1	A0A0G2K4T9	N-Term(TMT10)	0	0.988983	1		0.91692	1		1.02106	1		0.958393	1		1.04044	1		0.967469	1		1.01907	1		1.17734	1		0.925042	1		0	1.783e-09	77.54	4.21993e-07	2	1700.9	0.823369	63.9855	0
High	vEQLGAEGNVEESQk	4	1	1	B2RYP6	N-Term(TMT10); K15(TMT10)	0	1.17964	4	4.59597	1.15449	4	4.31046	0.915559	4	5.63524	0.954012	4	6.0115	0.953434	4	6.98105	0.973398	4	1.70896	0.917075	4	0.530588	1.00029	4	5.73209	1.15334	4	7.55616	0	1.558e-09	77.54	5.03925e-07	3	2075.11	1.52016	63.5155	0
High	yNILGTNAIMDk	1	1	1	D4A962	N-Term(TMT10); K12(TMT10)	0	1.04987	1		1.04531	1		0.94883	1		0.976471	1		1.04054	1		0.956779	1		0.997337	1		1.02553	1		1.04672	1		0	5.052e-09	77.53	5.07736e-07	2	1811.02	1.71616	85.1308	0
High	wQAVLAQTDVR	2	13	1	Q6S3A0	N-Term(TMT10)	0	0.955467	2	6.18447	0.964802	2	5.04587	1.01668	2	1.43106	0.998188	2	3.35662	1.05718	2	5.08078	0.967852	2	7.35889	1.06484	2	3.76991	1.06027	2	4.87425	0.91852	2	2.26452	0	1.427e-07	77.51	4.88789e-07	2	1515.85	1.47514	82.0384	0
High	kLDEAVAEAHLGk	7	2	1	P10760	N-Term(TMT10); K1(TMT10); K13(TMT10)	0	0.993035	7	6.06594	1.02059	7	1.97168	0.982	7	1.52186	1.04296	7	4.59641	0.977552	7	3.09216	1.03581	7	3.24256	0.964996	7	3.76406	0.918781	7	3.62122	1.07348	7	5.70866	0	1.595e-10	77.5	3.90332e-07	2	2068.24	1.80973	68.1596	1
High	nLIATEYLNYEDGk	1	1	1	D3Z941	N-Term(TMT10); K14(TMT10)	0	0.802278	1		0.777373	1		1.06427	1		1.05388	1		1.0956	1		1.04308	1		1.14433	1		1.16223	1		0.726773	1		0	3.07e-11	77.5	4.45459e-07	2	2101.12	1.31074	85.4385	0
High	kIQALQQQADDAEDR	5	2	1	P09495	N-Term(TMT10); K1(TMT10)	0	1.08316	5	2.5106	1.05991	5	8.70672	0.972884	5	1.51297	0.998464	5	0.586948	0.946319	5	5.81324	1.02635	5	5.36041	0.922376	5	4.27886	0.960683	5	2.85442	1.06098	5	10.5287	0	1.678e-11	77.5	4.77468e-07	3	2187.18	0.321523	56.1053	1
High	eLQVGIPVTDEAGQR	2	3	1	Q9JHY2	N-Term(TMT10)	0	0.975378	2	1.79729	0.950733	2	8.93899	0.956553	2	3.88186	1.01784	2	2.66167	1.02331	2	0.69113	1.0711	2	4.6924	1.05636	2	1.81692	0.976824	2	1.41844	0.972853	2	4.03742	0	2.402e-11	77.49	4.9461e-07	2	1841	0.761095	73.6227	0
High	hFIMQVVcEATQcPDTR	1	2	1	F2Z3Q8	N-Term(TMT10); C8(Carbamidomethyl); C13(Carbamidomethyl)	0	1.01808	1		0.978097	1		1.09414	1		1.03394	1		0.973287	1		1.05102	1		0.987719	1		0.975208	1		0.85033	1		0	3.54e-11	77.47	1.28924e-07	2	2321.11	1.22172	84.2785	0
High	gDYDVVINDYEk	2	4	1	A0A0G2K1K8	N-Term(TMT10); K12(TMT10)	0	0.93199	2	9.29588	1.06512	2	2.98747	0.957162	2	3.03898	1.04189	2	1.44804	0.97116	2	5.76278	1.04538	2	0.830539	0.962247	2	6.92675	0.974783	2	2.69744	1.07849	2	6.65	0	3.604e-09	77.4	3.28456e-07	2	1887.98	3.08833	76.5725	0
High	eALQDVEDENQ	3	1	1	P62260	N-Term(TMT10)	0	1.0573	3	1.11568	0.983487	3	13.6658	0.981945	3	6.80898	0.9819	3	0.593123	0.996946	3	4.33168	1.00786	3	0.698657	1.0363	3	4.67892	0.990268	3	0.380402	0.95004	3	8.74733	0	2.336e-05	77.39	7.47797e-08	2	1518.72	2.11121	64.6017	0
High	gSETSAVVTEEDDDDEDAAPPVIAPRPDHTk	1	1	1	Q64303	N-Term(TMT10); K31(TMT10)	0	0.996038	1		1.12843	1		0.961232	1		0.97197	1		0.960349	1		0.983306	1		0.995329	1		0.959079	1		1.14235	1		0	6.155e-14	77.38	2.38567e-07	4	3721.81	1.17617	64.3167	0
High	dNPLDPVLAk	2	1	1	Q5RJR8	N-Term(TMT10); K10(TMT10)	0	0.982926	2	2.13981	0.982681	2	5.84844	1.03693	2	1.5363	1.02999	2	1.35593	1.00094	2	4.51223	1.01121	2	4.3732	1.01509	2	2.55242	0.970913	2	0.0885868	0.968999	2	2.39534	0	1.806e-06	77.37	4.59911e-07	2	1539.92	2.05789	78.4907	0
High	lSEIDVSTEGVk	2	1	1	Q4FZY0	N-Term(TMT10); K12(TMT10)	0	1.01459	2	6.10422	0.981255	2	5.27301	1.01823	2	2.97584	1.03002	2	1.94316	0.982657	2	2.00333	1.00486	2	0.931012	0.992521	2	3.02487	1.00163	2	8.12955	0.987234	2	4.94295	0	7.485e-09	77.37	6.45891e-07	2	1734.99	2.13723	75.4855	0
High	lDAGNQLALIEEFHk	1	2	1	F1LRI5	N-Term(TMT10); K15(TMT10)	0	0.98605	1		0.97616	1		0.993911	1		1.02752	1		0.974956	1		0.997657	1		0.960384	1		1.12741	1		0.971251	1		0	2.072e-10	77.37	5.88173e-07	3	2156.21	0.871819	87.1787	0
High	sLQYGEQVNEILSR	1	1	1	D3ZN27	N-Term(TMT10)	0	0.931737	1		0.930678	1		1.06289	1		1.02589	1		1.03978	1		0.968567	1		1.04079	1		1.06471	1		0.91321	1		0	7.529e-11	77.35	5.2554e-07	2	1865	2.92734	83.0763	0
High	dGScGVSYVVQEPGDYEVSIk	2	2	1	A0A0H2UHR7	N-Term(TMT10); C4(Carbamidomethyl); K21(TMT10)	0	0.990366	2	6.65112	1.06141	2	0.602873	0.923737	2	0.61404	0.990218	2	0.784305	0.955302	2	1.8217	1.05707	2	0.167298	1.01513	2	0.981963	1.00338	2	0.31063	1.06048	2	3.84405	0	1.84e-12	77.35	3.24896e-07	2	2746.37	0.845356	82.1227	0
High	nQALNTDNYGHDLASVQALQR	1	6	1	Q6IRK8	N-Term(TMT10)	0	1.08214	1		0.886428	1		1.03741	1		0.92737	1		1.12161	1		0.813679	1		1.14036	1		1.08736	1		0.985385	1		0	1.065e-11	77.26	3.50493e-07	3	2557.31	4.04376	72.068	0
High	gLQTQNSDWYLk	2	1	1	G3V7Q7	N-Term(TMT10); K12(TMT10)	0	1.01816	2	3.83402	1.07075	2	0.553199	0.946701	2	4.98499	1.06781	2	1.77995	0.904982	2	0.557262	1.09964	2	1.59227	0.901176	2	0.114741	0.936613	2	2.2672	1.08756	2	4.10388	0	1.635e-09	77.25	4.68087e-07	2	1911.04	0.942424	78.0593	0
High	eLEEEVSNFQk	3	2	1	A0A0G2JUL7	N-Term(TMT10); K11(TMT10)	0	1.06536	3	2.02277	1.08427	3	8.70076	0.929554	3	0.487985	0.961571	3	0.721718	0.974915	3	2.29482	0.96829	3	0.0985711	0.983105	3	5.76327	0.937752	3	8.59202	1.17395	3	2.34368	0	2.413e-08	77.22	4.34346e-07	2	1809.97	2.1036	78.2295	0
High	nLSEFGLIQEk	1	1	1	B1WC61	N-Term(TMT10); K11(TMT10)	0	0.930935	1		0.930152	1		1.0113	1		0.965263	1		1.08777	1		0.994188	1		1.09958	1		1.05991	1		0.921607	1		0	2.015e-08	77.19	6.00649e-07	2	1736	1.78328	84.2877	0
High	eAQAVPATLQELEVTk	4	13	1	Q6S3A0	N-Term(TMT10); K16(TMT10)	0	1.07143	4	4.62368	1.05073	4	1.79417	0.992385	4	0.865964	1.01175	4	0.701132	0.96445	4	2.56316	1.02793	4	2.10604	0.937131	4	1.02411	0.955717	4	4.13809	1.04888	4	2.84763	0	1.351e-12	77.19	5.64362e-07	2	2185.25	1.55915	84.6662	0
High	kPADLQNLAPGTHPPFITFNSEVk	5	2	1	A3FM27	N-Term(TMT10); K1(TMT10); K24(TMT10)	0	0.941958	5	5.09566	0.959213	5	3.93963	0.923145	5	2.05569	0.999072	5	1.88517	1.05915	5	2.84427	1.01828	5	1.28173	1.05755	5	3.55625	1.08829	5	3.73427	1.02797	5	10.0049	0	2.042e-10	77.19	3.83881e-07	4	3308.86	-0.265077	82.8918	0
High	sGSIVVEGHELHEEDIR	5	2	1	A0A0G2JVL8	N-Term(TMT10)	0	0.919948	5	3.63229	0.900093	5	10.6241	1.02212	5	9.69229	1.08845	5	0.780862	1.04187	5	3.97107	1.01737	5	10.2255	1.03969	5	3.25004	0.982046	5	13.5398	0.90382	5	0.51229	0	5.965e-14	77.17	3.69344e-07	2	2135.1	0.892233	59.2337	0
High	lGTIAIQGAIEk	2	1	1	P17764	N-Term(TMT10); K12(TMT10)	0	0.979954	2	1.45606	0.999291	2	0.117127	1.00526	2	1.93334	1.00792	2	0.424705	1.05824	2	3.41682	0.958281	2	0.399296	1.0744	2	1.24565	1.01959	2	1.87386	0.919236	2	2.21557	0	5.421e-09	77.16	4.04811e-07	2	1672.04	1.57376	82.3095	0
High	aMEEGLTPQEIcDk	1	1	1	D3Z941	N-Term(TMT10); C12(Carbamidomethyl); K14(TMT10)	0	0.85796	1		0.793827	1		1.11591	1		1.15056	1		0.968409	1		1.12244	1		0.993354	1		0.96459	1		0.887589	1		0	2.402e-11	77.16	2.95195e-07	2	2079.05	0.822611	72.4538	0
High	vADMALHYANk	2	1	1	D4ACB8	N-Term(TMT10); K11(TMT10)	0	0.922233	2	5.59575	0.977421	2	0.35138	0.996913	2	2.23167	1.10932	2	3.97281	0.951896	2	2.6387	1.11082	2	1.48714	0.922837	2	1.81005	0.972109	2	2.25897	0.993753	2	4.41897	0	5.524e-08	77.15	5.06939e-07	2	1690.94	2.2207	70.0545	0
High	sHVEDGDVAGSPAVPPAEQDPVk	2	1	1	F1M853	N-Term(TMT10); K23(TMT10)	0	0.989983	2	6.30134	1.03227	2	5.55344	1.00588	2	3.37358	1.01061	2	5.51027	1.01482	2	8.9852	0.939832	2	1.373	0.995153	2	6.69805	1.04977	2	4.7225	0.99998	2	12.0068	0	1.358e-12	77.15	4.80917e-07	3	2759.42	-0.246271	58.3803	0
High	aLDIAENEMPGLMR	3	2	1	P10760	N-Term(TMT10)	0	0.998062	3	1.42399	1.06071	3	12.1327	1.00113	3	5.9451	0.970688	3	4.74779	0.991683	3	1.534	1.02759	3	0.327319	0.936422	3	2.15414	0.96966	3	2.57533	1.05322	3	4.30431	0	4.192e-09	77.14	3.41958e-07	2	1788.92	0.525436	86.9108	0
High	dIGAIAQVHAENGDIIAEEQQR	1	1	1	P47942	N-Term(TMT10)	0	1.07812	1		1.0372	1		0.849502	1		0.944938	1		1.03527	1		0.96226	1		0.889897	1		1.0947	1		1.26696	1		0	6.439e-13	77.14	4.91686e-07	3	2606.34	1.8347	73.6062	0
High	kLEVNEAELLR	4	2	1	G3V8L9	N-Term(TMT10); K1(TMT10)	0	1.14395	4	4.16908	1.15207	4	0.194827	0.96316	4	2.49765	0.978051	4	3.75236	0.937871	4	2.01467	0.973355	4	3.36857	0.907001	4	1.08202	0.887617	4	1.37045	1.17629	4	1.32973	0	5.419e-08	77.12	4.77458e-07	2	1772.07	1.65868	72.4798	1
High	aAYPDLENPPLVVTPSQQPk	2	1	1	P40329	N-Term(TMT10); K20(TMT10)	0	0.892322	2	3.65697	0.910364	2	6.80501	1.00108	2	2.47982	1.08923	2	6.03784	0.954685	2	2.71135	1.15118	2	1.14741	0.918503	2	4.89596	0.971439	2	3.66902	1.05111	2	8.4814	0	1.33e-10	77.12	5.52182e-07	2	2622.46	2.13282	82.0864	0
High	aAAMSAVEAATcR	1	1	1	Q5PQJ6	N-Term(TMT10); C12(Carbamidomethyl)	0	1.02564	1		1.03986	1		1.02152	1		1.00526	1		0.924531	1		1.06054	1		0.905281	1		1.01958	1		1.02237	1		0	1.155e-09	77.11	2.29552e-07	2	1537.77	1.92453	66.5595	0
High	gVDYNAEIPFEk	1	1	1	O08837	N-Term(TMT10); K12(TMT10)	0	1.03281	1		1.07232	1		0.980284	1		1.00116	1		1.00661	1		1.02556	1		0.912555	1		0.928476	1		1.10778	1		0	7.929e-09	77.11	5.14548e-07	2	1839.99	2.433	81.8527	0
High	yGIVDYMVEQSGPPSk	3	2	1	G3V6T7	N-Term(TMT10); K16(TMT10)	0	1.17356	3	6.29003	1.19447	3	1.57094	0.890947	3	3.00437	0.967024	3	0.720679	0.884296	3	4.45803	1.02122	3	5.91313	0.897413	3	1.28811	0.920972	3	0.110394	1.24032	3	5.78787	0	1.143e-11	77.11	4.45487e-07	2	2228.17	0.059586	86.6493	0
High	sVSASYQADAk	5	2	1	O08984	N-Term(TMT10); K11(TMT10)	0	1.09273	5	6.21895	1.12337	5	4.18775	0.985801	5	3.67642	1.00916	5	1.39377	0.954249	5	10.6972	0.96753	5	4.11851	0.930322	5	2.01514	0.957007	5	4.33654	1.11753	5	3.85194	0	3.419e-09	77.1	4.08492e-07	2	1584.87	1.34448	54.4984	0
High	lYMVSDASGSMk	2	2	1	E9PU64	N-Term(TMT10); K12(TMT10)	0	0.904694	2	10.1821	0.871287	2	5.38891	1.04847	2	2.77909	1.09525	2	3.86162	0.959172	2	1.91151	1.11391	2	5.45813	0.995661	2	8.01759	1.01875	2	1.19368	0.897991	2	2.89273	0	4.195e-09	77.1	4.16292e-07	2	1746.92	2.89162	78.2675	0
High	gALYcELcYEk	2	1	1	Q62920	N-Term(TMT10); C5(Carbamidomethyl); C8(Carbamidomethyl); K11(TMT10)	0	1.38531	2	9.19033	1.44062	2	0.70323	0.966672	2	2.6424	1.08633	2	1.69584	0.57811	2	8.63994	1.10379	2	2.21486	0.537501	2	2.20956	0.566427	2	6.6591	1.57066	2	1.1846	0	8.445e-09	77.1	2.87602e-07	2	1863.94	1.03221	77.5433	0
High	lAGDPAPVVNDIHk	2	2	1	F1M8K0	N-Term(TMT10); K14(TMT10)	0	1.25431	2	3.73393	1.23691	2	5.03274	0.916326	2	3.57633	0.932859	2	1.91062	0.908021	2	0.77452	0.92277	2	6.45646	0.887998	2	4.57025	0.912519	2	0.702326	1.24556	2	0.754495	0	1.618e-09	77.09	6.90859e-07	3	1904.1	1.58949	66.9298	0
High	iLDQGEDFPASELAR	1	1	1	P52555	N-Term(TMT10)	0	1.08135	1		1.13434	1		0.920893	1		1.03776	1		0.906317	1		1.01772	1		0.949972	1		0.941853	1		1.10584	1		0	5.734e-11	77.08	3.97645e-07	2	1889.99	3.44813	84.9385	0
High	ekYPNLQVIGGNVVTAAQAk	1	2	1	E9PU28	N-Term(TMT10); K2(TMT10); K20(TMT10)	0	0.846568	1		0.973508	1		0.993621	1		1.0776	1		1.03607	1		1.11632	1		0.9316	1		0.980796	1		0.994935	1		0	1.528e-12	77.07	3.31808e-07	3	2787.64	2.04837	83.4434	1
High	gVcTEAGMYALR	2	1	1	P62198	N-Term(TMT10); C3(Carbamidomethyl)	0	0.965373	2	6.00587	0.994167	2	5.63162	1.01044	2	5.14064	1.06862	2	1.78236	0.982995	2	8.55159	1.05263	2	8.12906	0.964925	2	11.5715	0.961693	2	5.45073	0.97647	2	10.9486	0	3.332e-09	77.05	2.01187e-07	2	1556.78	1.70927	66.5992	0
High	aSHQEVLEAGk	2	1	1	P85973	N-Term(TMT10); K11(TMT10)	0	1.03858	2	7.51872	0.991524	2	12.1394	1.0162	2	3.72403	1.02481	2	10.4077	0.924755	2	1.70565	1.11905	2	6.88947	0.971887	2	4.58554	0.948262	2	1.77172	0.943724	2	4.57988	0	5.26e-09	77.05	5.25651e-07	2	1626.92	-0.0989492	49.4579	0
High	lQIQcVVEDDk	2	3	2	Q68FR9;B5DEN5	N-Term(TMT10); C5(Carbamidomethyl); K11(TMT10)	0																												0	3.365e-08	77.02	6.47467e-07	2	1804.99	2.76911	80.0549	0
High	tMQGSEVVNVLk	2	2	1	A0A140TAA4	N-Term(TMT10); K12(TMT10)	0	0.878072	2	1.14454	0.883125	2	11.1236	1.05081	2	3.19007	1.01754	2	5.37648	1.06398	2	7.25023	1.02893	2	4.52717	1.10402	2	7.10939	1.04935	2	7.04917	0.856998	2	1.66703	0	4.092e-09	77.01	6.42987e-07	2	1763.01	0.649386	76.8585	0
High	sQLScVVVDDIER	2	3	1	A0A0G2K6U1	N-Term(TMT10); C5(Carbamidomethyl)	0	1.09096	2	0.39915	1.04938	2	1.36201	1.05416	2	4.95648	0.962927	2	1.39394	1.02179	2	4.17652	0.952963	2	3.41752	1.0006	2	2.7976	1.02515	2	2.37512	0.885338	2	6.24329	0	1.374e-09	77	3.92069e-07	2	1748.91	2.64637	81.2705	0
High	fNVWDTAGQEk	4	3	1	P62828	N-Term(TMT10); K11(TMT10)	0	0.927196	4	3.81857	0.925036	4	1.57671	1.06045	4	1.56738	1.0428	4	1.3263	1.04901	4	3.70829	1.03534	4	1.23201	1.01915	4	2.0324	1.02604	4	1.2399	0.837981	4	4.21268	0	3e-08	77	4.55917e-07	2	1752.93	1.05096	81.4953	0
High	sGDGGSAGPGGk	6	2	1	A0A0G2K0B0	N-Term(TMT10); K12(TMT10)	0	0.996372	6	9.45377	1.05016	6	12.3306	0.973947	6	6.23226	0.927584	6	5.29773	1.11809	6	9.58933	0.939504	6	3.01631	1.09028	6	6.21761	1.05823	6	5.15521	0.907627	6	9.34664	0	4.151e-08	76.99	3.52976e-07	2	1404.75	1.00243	36.239	0
High	dENSSVYAEVSR	2	1	1	G3V8C8	N-Term(TMT10)	0	0.962946	2	2.22877	0.960638	2	3.24934	1.00701	2	3.92773	0.956085	2	1.87536	1.09672	2	0.619138	0.969883	2	9.93544	1.11315	2	2.81073	1.06975	2	6.20221	0.872257	2	4.32458	0	1.236e-09	76.98	1.60358e-07	2	1584.77	0.364925	55.9447	0
High	yGEPGEVFINk	2	2	1	Q4KM71	N-Term(TMT10); K11(TMT10)	0	1.19809	2	7.72204	1.16409	2	2.56921	0.933508	2	1.82158	0.950162	2	3.28374	0.957793	2	0.0963735	0.950418	2	5.19371	0.923849	2	1.2601	0.894884	2	2.76606	1.19743	2	5.84016	0	2.572e-08	76.98	5.41207e-07	2	1710.95	1.18809	77.1232	0
High	aIEDMTEEAFQk	2	2	1	A0A0G2K7Q7	N-Term(TMT10); K12(TMT10)	0	1.07966	2	10.3111	1.11113	2	6.95119	0.957905	2	0.936379	1.02854	2	1.16401	0.911323	2	7.89885	1.03831	2	1.96954	0.913156	2	8.79586	0.90924	2	6.67622	1.12506	2	6.28053	0	1.149e-09	76.96	3.89656e-07	2	1869.97	0.810756	86.7972	0
High	aESPEVEMNLPk	4	2	1	A0A0G2JUA5	N-Term(TMT10); K12(TMT10)	0	1.11322	4	6.18247	1.14402	4	4.98427	0.93918	4	3.45618	0.956622	4	4.18599	0.962612	4	4.97363	0.957476	4	1.91186	0.975343	4	2.62607	0.974462	4	1.77955	1.14737	4	8.24195	0	4.395e-08	76.95	5.22757e-07	2	1801.98	1.97179	71.2352	0
High	iDATSASMLASk	3	2	1	G3V6T7	N-Term(TMT10); K12(TMT10)	0	0.96551	3	18.1822	0.991354	3	23.8413	1.023	3	4.89018	0.952432	3	0.591992	1.03418	3	10.9284	0.91141	3	1.14243	1.06241	3	15.8897	1.06125	3	4.54299	1.0256	3	16.5625	0	2.624e-09	76.91	5.93798e-07	2	1652.93	2.12569	74.7885	0
High	aAAVSDIQELMR	2	2	1	G3V9P0	N-Term(TMT10)	0	0.961681	2	1.20776	1.02883	2	1.18347	1.02385	2	0.689994	1.04676	2	0.701803	0.940376	2	0.372029	1.05682	2	3.44949	0.953138	2	1.55341	0.964245	2	2.68291	1.02598	2	1.16519	0	9.162e-09	76.9	4.13452e-07	2	1532.83	1.44562	85.9883	0
High	sLLINAVEAScIR	1	2	2	Q6AY23;D3ZXI0	N-Term(TMT10); C11(Carbamidomethyl)	0																												0	1.541e-09	76.89	7.67417e-07	2	1674.95	2.8485	87.5828	0
High	tSFVNFTDIck	1	1	1	Q6P685	N-Term(TMT10); C10(Carbamidomethyl); K11(TMT10)	0	1.07874	1		1.11576	1		1.09351	1		1.0087	1		0.944044	1		0.999646	1		0.931006	1		0.873599	1		0.995946	1		0	1.925e-08	76.89	5.33099e-07	2	1789.96	1.73338	85.2119	0
High	gPSVDVEVPDVDLEcPEAk	2	2	1	A0A0G2JUA5	N-Term(TMT10); C15(Carbamidomethyl); K19(TMT10)	0	1.15369	2	15.4755	1.19433	2	13.0673	0.921821	2	9.54239	0.991072	2	4.65864	0.868458	2	12.0734	0.971305	2	5.74982	0.899266	2	7.93858	0.931667	2	3.57516	1.20303	2	17.4614	0	1.152e-12	76.85	4.65743e-07	2	2513.29	1.38235	83.9304	0
High	vAHSFNcTPIEGMLSHQLk	2	2	1	Q6AYD3	N-Term(TMT10); C7(Carbamidomethyl); K19(TMT10)	0	0.932317	2	0.3238	1.06256	2	13.0838	0.948883	2	11.6569	1.07343	2	4.55618	0.871224	2	18.758	1.10316	2	2.93252	0.925557	2	3.43726	0.897791	2	7.47884	1.1927	2	18.9106	0	1.111e-10	76.81	5.80531e-07	4	2627.39	0.566107	79.4147	0
High	gEFGGFGSVSGk	2	2	1	B5DFB2	N-Term(TMT10); K12(TMT10)	0	1.1628	2	15.0613	1.15817	2	21.6445	0.948018	2	12.502	0.967337	2	7.26024	0.951494	2	15.541	0.948248	2	0.828622	0.916467	2	12.3043	0.912028	2	5.26466	1.14604	2	21.6845	0	1.005e-08	76.8	4.75315e-07	2	1586.86	2.08484	72.748	0
High	sLEMTFIPTAEDTGk	1	2	1	P29534	N-Term(TMT10); K15(TMT10)	0	0.605775	1		0.563855	1		1.32747	1		1.31465	1		0.936401	1		1.29205	1		0.929604	1		0.976299	1		0.642308	1		0	1.235e-09	76.78	5.81406e-07	2	2098.12	0.577096	87.2173	0
High	nDMAALTAAGk	2	3	1	P35435	N-Term(TMT10); K11(TMT10)	0	0.933558	2	1.49661	0.911982	2	4.63416	0.995171	2	3.60421	0.988065	2	2.91495	1.08371	2	2.40207	0.979159	2	10.5802	1.10698	2	4.56039	1.06348	2	2.79536	0.936166	2	2.64904	0	1.268e-07	76.75	6.48841e-07	2	1520.85	2.00681	65.6387	0
High	gVITMNEEYETR	2	2	1	P0C089	N-Term(TMT10)	0	1.00614	2	12.8913	1.01332	2	8.76215	0.996417	2	2.65221	1.03242	2	1.6239	0.953822	2	10.9121	1.0387	2	1.23801	0.948933	2	8.19955	0.962321	2	6.7696	1.06587	2	11.0178	0	2.581e-09	76.74	2.28783e-07	2	1670.83	1.44198	65.8263	0
High	lTGTLSGWTSPk	3	1	1	Q9ER34	N-Term(TMT10); K12(TMT10)	0	0.779279	3	14.776	0.831203	3	19.1013	1.02115	3	10.2168	0.910714	3	18.8723	1.90266	3	82.7613	0.817378	3	15.2061	1.03357	3	5.23373	0.901098	3	21.7823	0.752043	3	11.9132	0	1.414e-08	76.71	6.32448e-07	2	1705.99	1.85682	83.0945	0
High	tNSTFNQVVLk	1	3	1	P12001	N-Term(TMT10); K11(TMT10)	0	0.958604	1		0.93777	1		1.09135	1		0.977225	1		1.02809	1		1.04692	1		1.06041	1		0.999331	1		0.860427	1		0	4.316e-08	76.71	6.6231e-07	2	1709	1.05279	71.0698	0
High	lSSTWEGIQAGk	4	1	1	Q9EQS0	N-Term(TMT10); K12(TMT10)	0	0.917607	4	8.08939	0.908343	4	9.66521	1.05632	4	2.5124	1.07993	4	3.33527	0.973131	4	7.64003	1.07853	4	2.53127	1.03455	4	0.709362	0.987104	4	6.38064	0.848144	4	10.6139	0	5.522e-09	76.71	7.74295e-07	2	1734.98	1.79254	77.5003	0
High	eTMcSSTNPIMAQcFDk	2	1	1	Q63355	N-Term(TMT10); C4(Carbamidomethyl); C14(Carbamidomethyl); K17(TMT10)	0	0.992143	2	3.50264	1.04136	2	0.302007	0.970407	2	1.10762	1.03259	2	0.905767	0.990673	2	2.66202	1.05877	2	2.34023	0.946162	2	0.0313855	0.932971	2	2.4585	1.06895	2	0.483416	0	2.658e-12	76.71	8.31888e-08	2	2478.15	0.300754	78.0195	0
High	lLDEEEATDNDLR	1	2	1	A0A140TAA4	N-Term(TMT10)	0	0.962215	1		1.01304	1		1.03928	1		1.06308	1		0.939767	1		1.08086	1		0.99572	1		0.926462	1		0.95394	1		0	2.59e-09	76.69	2.08932e-07	2	1761.87	1.96703	70.8084	0
High	aPSVANVGSHcDLSLk	2	1	1	C0JPT7	N-Term(TMT10); C11(Carbamidomethyl); K16(TMT10)	0	1.09901	2	4.63777	1.16381	2	5.86715	0.890338	2	4.47603	1.05339	2	0.412276	0.744264	2	6.02159	1.15011	2	0.775234	0.749984	2	5.98711	0.812403	2	1.43288	1.46811	2	3.0323	0	1.445e-08	76.69	6.65368e-07	3	2113.15	2.08382	64.8782	0
High	fASENDLPEWk	5	1	1	D4A2G9	N-Term(TMT10); K11(TMT10)	0	0.929439	5	5.48651	0.904579	5	6.85573	1.02644	5	2.65892	1.04299	5	2.79551	1.04017	5	0.545551	1.01508	5	4.32209	1.03966	5	5.36932	1.03097	5	0.271922	0.916353	5	3.46253	0	6.741e-08	76.68	5.33736e-07	2	1793.95	1.80935	83.9163	0
High	eALELTDTGLLSGSEER	2	3	1	F1LRT9	N-Term(TMT10)	0	0.991432	2	3.79424	1.02533	2	6.22156	0.985946	2	4.27245	1.01674	2	0.924954	0.943832	2	7.03181	1.06213	2	5.94969	0.941362	2	2.93183	0.976824	2	3.18707	1.08475	2	3.13688	0	2.825e-11	76.64	4.19451e-07	2	2049.06	2.37121	84.2976	0
High	kNPLPPSVGVADk	4	1	1	Q6AXS5	N-Term(TMT10); K1(TMT10); K13(TMT10)	0	0.982994	4	5.20112	0.94979	4	3.79157	1.05192	4	4.2932	1.01542	4	3.02771	1.01975	4	4.73082	1.00794	4	2.14107	0.965499	4	4.96893	0.99333	4	3.82497	0.959004	4	7.35249	0	2.033e-07	76.63	4.26936e-07	2	2009.24	1.31488	61.6791	1
High	sVEAAAELSAk	8	1	1	P04550	N-Term(TMT10); K11(TMT10)	0	1.18678	8	9.33208	1.18342	8	8.4789	0.992375	8	4.9176	0.975598	8	3.30746	0.897957	8	6.69664	0.967258	8	4.85796	0.90732	8	4.36736	0.908473	8	8.17662	1.16918	8	7.18833	0	1.252e-07	76.61	7.47585e-07	2	1533.89	2.18673	63.888	0
High	eMLGLYTENEGk	2	2	1	O88600	N-Term(TMT10); K12(TMT10)	0	0.923113	2	5.63949	0.916974	2	4.02845	0.970542	2	2.16003	1.05119	2	0.395949	1.03304	2	0.299386	1.06235	2	3.12055	0.999673	2	1.80553	1.05388	2	5.84859	0.963812	2	1.88689	0	5.216e-09	76.61	5.23855e-07	2	1841.98	1.98061	78.5172	0
High	wALSQSNPSALR	1	1	1	P46462	N-Term(TMT10)	0	1.09613	1		1.02159	1		1.04153	1		0.979327	1		1.01227	1		0.908918	1		1.05875	1		1.0596	1		0.872592	1		0	7.327e-09	76.59	5.8219e-07	2	1558.85	0.526429	70.7687	0
High	aQEEQAWVQLk	1	1	1	Q9EPJ3	N-Term(TMT10); K11(TMT10)	0	1.00203	1		1.01471	1		0.977028	1		1.0173	1		0.992297	1		1.05386	1		0.983529	1		1.0154	1		0.96049	1		0	1.104e-08	76.59	6.73191e-07	2	1788.01	1.56887	76.6419	0
High	aEGPQEWVFQEck	2	2	1	A0A0G2K7Q7	N-Term(TMT10); C12(Carbamidomethyl); K13(TMT10)	0	1.08377	2	0.746332	1.1065	2	3.02322	0.963527	2	1.81318	1.02343	2	0.816887	0.877251	2	1.3177	1.04769	2	1.17714	0.912085	2	0.00401981	0.931949	2	9.35532	1.1318	2	1.82985	0	1.832e-10	76.57	3.56874e-07	2	2066.04	0.820568	81.5687	0
High	eSSASEGADQk	1	5	1	M0RBF0	N-Term(TMT10); K11(TMT10)	0	1.12175	1		1.12488	1		0.945156	1		1.03396	1		0.871326	1		1.11037	1		0.896217	1		0.871881	1		1.09612	1		0	1.613e-09	76.56	3.32305e-07	2	1566.8	0.616748	37.3593	0
High	iSVYYNEATGGk	4	1	1	P69897	N-Term(TMT10); K12(TMT10)	0	1.16363	4	3.68409	1.21899	4	4.04436	0.940604	4	2.052	0.977561	4	3.62564	0.905917	4	4.89489	1.02729	4	3.20885	0.872921	4	3.30709	0.890621	4	3.06252	1.1487	4	3.27572	0	2.724e-08	76.55	6.1856e-07	2	1759.97	1.29226	75.2141	0
High	hVDYVADQIVSk	1	3	1	P41516	N-Term(TMT10); K12(TMT10)	0	1.15237	1		1.18322	1		0.990584	1		0.999093	1		0.846664	1		1.02973	1		0.840693	1		0.84266	1		1.24384	1		0	6.138e-09	76.55	6.84953e-07	2	1832.04	3.62135	65.0105	0
High	dVDPDVIQTHLDk	2	3	1	G3V7L1	N-Term(TMT10); K13(TMT10)	0	1.00729	2	2.68482	1.07653	2	1.67094	0.984587	2	1.41485	1.00248	2	0.726143	0.980809	2	1.24932	0.993131	2	0.305246	0.958535	2	3.33776	0.993938	2	0.917902	1.0647	2	0.0772263	0	7.165e-10	76.55	7.00444e-07	2	1953.07	2.30654	69.6494	0
High	nNVTPDMMEEMYk	4	2	1	P09895	N-Term(TMT10); K13(TMT10)	0	0.917478	4	1.61892	0.896804	4	1.98553	1.03261	4	3.70841	1.00335	4	4.45404	1.07194	4	6.35699	0.995415	4	2.89625	1.07602	4	2.73632	1.07248	4	1.27477	0.907939	4	3.67805	0	1.347e-07	76.55	1.73728e-07	2	2059.99	1.85094	80.735	0
High	sSSVVELDLEGTR	1	3	1	M0RC12	N-Term(TMT10)	0	0.980564	1		1.011	1		1.028	1		0.992904	1		0.997967	1		0.979391	1		1.04214	1		1.01358	1		0.981439	1		0	6.321e-10	76.54	4.62494e-07	2	1620.87	1.60753	72.5244	0
High	aGAIAPcEVTVPAQNTGLGPEk	5	1	1	P19945	N-Term(TMT10); C7(Carbamidomethyl); K22(TMT10)	0	0.931986	5	5.06886	0.929359	5	2.67738	0.986759	5	3.40496	1.0668	5	2.13419	1.01496	5	4.26489	1.07363	5	0.95628	0.974199	5	2.44954	0.979221	5	6.15426	0.982019	5	12.4123	0	3.536e-11	76.52	7.29813e-07	2	2638.43	1.37227	75.5259	0
High	eLSLDDPEVEQVR	1	1	1	Q5XI97	N-Term(TMT10)	0	1.00822	1		1.04168	1		0.988386	1		1.00559	1		0.981252	1		0.986213	1		0.977022	1		0.971812	1		1.10341	1		0	7.752e-10	76.49	3.74728e-07	2	1757.92	2.12963	73.6112	0
High	yLIANATNPESk	2	1	1	P68255	N-Term(TMT10); K12(TMT10)	0	1.15919	2	5.14963	1.12015	2	2.49242	0.961434	2	3.40383	1.0223	2	4.53711	0.906392	2	0.359233	1.00908	2	1.9454	0.902039	2	4.3964	0.937128	2	5.1748	1.07888	2	2.21768	0	6.119e-09	76.49	7.35993e-07	2	1779.01	1.9794	68.2375	0
High	dGVANVSIEDR	5	3	1	Q6LDS4	N-Term(TMT10)	0	1.11359	5	5.52991	1.16791	5	6.9347	1.03626	5	3.57672	1.02741	5	1.94017	0.816339	5	3.46436	1.00935	5	1.25486	0.913882	5	6.3207	0.886092	5	7.93181	1.02983	5	3.43554	0	1.357e-07	76.48	3.35109e-07	2	1403.73	1.29187	59.3032	0
High	aIEcSYTSADGLk	2	1	1	Q9Z2Z8	N-Term(TMT10); C4(Carbamidomethyl); K13(TMT10)	0	1.00554	2	23.7631	1.01825	2	22.2998	1.02081	2	17.0317	1.01547	2	5.32684	0.986548	2	21.0046	0.99459	2	7.28357	0.927807	2	15.5698	0.994081	2	9.1182	1.00134	2	31.1403	0	1.747e-10	76.48	4.18324e-07	2	1872.98	1.45599	66.7861	0
High	aEMEAAVAAck	1	2	1	G3V7J0	N-Term(TMT10); C10(Carbamidomethyl); K11(TMT10)	0	1.26489	1		1.29555	1		1.04359	1		1.09929	1		0.661363	1		1.1071	1		0.693325	1		0.697513	1		1.25179	1		0	4.221e-08	76.45	5.14074e-07	2	1608.85	3.33679	66.2484	0
High	fQHGVIVAADSR	3	2	1	G3V7Q6	N-Term(TMT10)	0	1.0591	3	0.99877	1.06159	3	1.70314	0.969379	3	0.477255	0.962566	3	0.051844	1.04647	3	0.914608	0.934542	3	2.16785	1.02541	3	2.33953	0.97547	3	5.7935	1.00811	3	1.05097	0	7.637e-09	76.39	5.9011e-07	2	1528.85	3.13231	59.8613	0
High	hEAGDVMGGHAIR	1	2	1	P00787	N-Term(TMT10)	0	0.990693	1		0.961177	1		1.07526	1		0.988041	1		1.07716	1		0.938775	1		0.979205	1		1.10829	1		0.884192	1		0	2.173e-09	76.39	3.70828e-07	2	1578.8	2.58166	43.5331	0
High	aYHEQLSVAEITNAcFEPANQMVk	4	4	2	P68370;Q5XIF6	N-Term(TMT10); C15(Carbamidomethyl); K24(TMT10)	0																												0	4.412e-14	76.39	4.83339e-07	3	3208.62	1.11681	83.6658	0
High	aEGPEVDVNLPk	7	3	2	A0A0G2JUA5;Q38PG1	N-Term(TMT10); K12(TMT10)	0																												0	1.518e-08	76.36	6.4969e-07	2	1725.98	2.12874	71.6427	0
High	iVFLEESSQQEk	3	2	1	Q9JKB7	N-Term(TMT10); K12(TMT10)	0	0.937954	3	17.3224	1.03438	3	28.1186	0.996961	3	8.10797	1.02176	3	7.76036	0.954775	3	21.5136	0.93473	3	7.98654	0.95255	3	16.857	0.985991	3	16.4114	0.978847	3	23.7125	0	2.796e-09	76.36	7.37549e-07	2	1895.05	0.958103	82.1294	0
High	gIAGLGDVAEVR	1	2	1	P53534	N-Term(TMT10)	0	1.01958	1		0.927984	1		0.991579	1		0.98329	1		1.0064	1		1.03723	1		0.994197	1		1.03917	1		1.02471	1		0	5.571e-09	76.34	5.72555e-07	2	1385.8	1.24638	74.2809	0
[truncated: 15,004 more rows]
