# Supplementary material for: TMT-based quantitative proteomics analysis reveals the effect of bovine derived MFG-E8 against oxidative stress on rat L6 cells
Source: Royal Society of Chemistry journal article supplement (doi:10.1039/d1fo01135a), 2021-01-01
Supplement: d1fo01135a3.pdf [file d1fo01135a3.pdf]

Table S1 The higher abundant proteins in L6 cell

| NO | Protein IDs | Fasta headers                                  | Peptide sequence     | Biological function                      |
|----|-------------|------------------------------------------------|----------------------|------------------------------------------|
| 1  | P97691      | Forkhead box protein M1                        | sLTEGLVLDTMNDLSk     | Mitochondria metabolism                  |
| 2  | A1A5R2      | G protein-coupled receptor (GPCR5A)            | aAAPSGcR             | Mitochondria-dependent cell apoptosis    |
| 3  | A0A0G2K836  | ADAM metallopeptidase                          | cVNER                | Cell apoptotic process                   |
| 4  | P29457      | Serpin H1                                      | kPVEAAAPGTAEk        | Cell proliferation                       |
| 5  | Q63041      | Alpha-1-macroglobulin                          | vVVQk                | Cell proliferation                       |
| 6  | F1MAL5      | Insulin receptor substrate 2                   | aGAPk                | Cell proliferation                       |
| 7  | P70490      | Lactadherin                                    | vAHSDDGVQWTVYEEQGTsk | Cell proliferation                       |
| 8  | A1A5P2      | Ribosome biogenesis regulatory protein         | aRDDTk               | Cell cycle process                       |
| 9  | F1M8Y2      | Tetraspanin                                    | aVDHVQR              | Cell cycle process                       |
| 10 | P13941      | Collagen alpha-1(III) chain                    | gAPGPQGPR            | Skeletal development                     |
| 11 | P02454      | Collagen alpha-1(I) chain                      | qGPSGASGER           | Skeletal development                     |
| 12 | G3V614      | KIF-binding protein                            | dAEGPGAQR            | Embryonic development                    |
| 13 | Q9EPI1      | Xylosyltransferase 1                           | fVEYVAFSTDDLVTk      | Proteoglycan biosynthesis                |
| 14 | Q2KML4      | Dynein axonemal heavy chain-like protein       | gGSPk                | ATP-dependent microtubule motor activity |
| 15 | A0A0G2K1E3  | [Histone H3]-lysine (4) N-trimethyltransferase | vIHVEGQkHIVIFALRR    | Transcription regulation                 |
| 16 | B3SVE5      | Neuroprotective protein 8                      | qQAGQEQEK            | Brain formation                          |

Note: C: control; Rot: rotenone 1  $\mu$ M; E8: MFG-E8 200  $\mu$ g/mL; the lowercase of peptide sequence means that this is a modification site

Table S2 Effect of MFG-E8 on Rot-induced significantly up-regulated proteins of L6 cell

| NO | Protein IDs | Fasta headers                                        | Peptide sequence    | Biological function                   |
|----|-------------|------------------------------------------------------|---------------------|---------------------------------------|
| 1  | D4ADT4      | Similar to transmembrane protein 44 isoform          | sGQSSR              | Mitochondrial function                |
| 2  | F1M5G8      | Transmembrane protein 131                            | gRPAmPEkQESELSQGkPk | Mitochondrial function                |
| 3  | U3R7A7      | Keratin 71                                           | gGENR               | Mitochondria dysfunction              |
| 4  | Q5XIB0      | Interferon regulatory factor 3                       | IAEDRSk             | Mitochondria-dependent cell apoptosis |
| 5  | Q66HA1      | Mitogen-activated protein kinase kinase kinase<br>11 | sAPGTPGTPR          | Mitochondria-dependent cell apoptosis |
| 6  | P21707      | Synaptotagmin-1                                      | iHLMQNGKR           | Cell proliferation                    |
| 7  | Q9EQL5      | Transmembrane 4 L6 family member 4                   | cTGGcAR             | Cell proliferation                    |
| 8  | Q9R1J8      | Prolyl 3-hydroxylase 1                               | tAIEESQAER          | Cell proliferation                    |
| 9  | Q5BJN8      | Replication stress response regulator SDE2           | vVSAEVTETR          | Cell cycle process                    |
| 10 | B1WBZ4      | CDC45 cell division cycle 45-like                    | qkFQSM DVSLk        | Cell cycle process                    |
| 11 | M0RDX6      | E2F transcription factor 2                           | aPPQTRLEVPDR        | Cell cycle process                    |
| 12 | Q642A5      | DNA polymerase epsilon subunit 3                     | dcEEQDk             | Response to DNA damage                |
| 13 | B2GV08      | AP complex subunit sigma                             | aIEQADLLQEEAETPR    | Protein transport                     |
| 14 | D4A5S6      | ALG1                                                 | dSQSR               | Protein glycosylation                 |

|    |            |                                                     |                      |                                          |
|----|------------|-----------------------------------------------------|----------------------|------------------------------------------|
| 15 | E9PT30     | Intelectin 1                                        | tQLGFLFLIVATRGGSAAk  | Protein phosphorylation                  |
| 16 | A0A0G2JST3 | keratin-1                                           | wELLQQVDTSTR         | Inflammatory response                    |
| 17 | Q6P777     | Multivesicular body subunit 12A                     | tAAAR                | Signaling transduction                   |
| 18 | A0A0G2K7A0 | Potassium voltage-gated channel subfamily H         | dITDTk               | Ion transmembrane transport              |
| 19 | G3V8Q8     | RCG40648, isoform                                   | gQGESAPk             | Ion binding                              |
| 20 | D4A0H5     | Cleavage and polyadenylation specific factor 1      | kEEEETPkAESTEQEPSAPk | Enzyme binding                           |
| 21 | D3ZM91     | Syncoilin                                           | gGDGAR               | Neuromuscular development                |
| 22 | D4ABR1     | Pleckstrin homology and RhoGEF domain-containing G6 | gSGQTR               | Neurogenesis                             |
| 23 | M0R8U1     | Dynein heavy chain 5, axonemal                      | rSTHVTPk             | ATP-dependent microtubule motor activity |
| 24 | D4A409     | Laminin subunit alpha 1                             | qVFQVAYVIIk          | Embryonic development                    |
| 25 | O35165     | Golgi SNAP receptor complex member 2                | vDQLk                | Intracellular transport                  |

Note: C: control; Rot: rotenone 1  $\mu$ M; E8: MFG-E8 200  $\mu$ g/mL; the lowercase of peptide sequence means that this is a modification site

Table S3 Effect of MFG-E8 on Rot-induced significantly down-regulated proteins of L6 cell

| NO | Protein IDs | Fasta headers               | Peptide sequence | Rot/C                   |
|----|-------------|-----------------------------|------------------|-------------------------|
| 1  | P97691      | Forkhead box protein M1     | sLTEGLVLDTMNDLSk | Mitochondria metabolism |
| 2  | D3ZSB7      | Ribosomal protein S6 kinase | aGGHDAGk         | Mitochondria function   |

|    |        |                                     |                                 |                           |
|----|--------|-------------------------------------|---------------------------------|---------------------------|
| 3  | D4A4V3 | Kruppel-like factor 3               | yGVIYSTPLPdk                    | Mitochondrial function    |
| 4  | Q5XIH5 | GTP binding protein 5               | ILSVGIVDHAK                     | Mitochondria translation  |
| 5  | D4AAH6 | Proteasome assembly chaperone 1     | aGTEEEEEEEQSR                   | Cell proliferation        |
| 6  | O88432 | Polo-like kinase                    | aDANITPk                        | Cell proliferation        |
| 7  | A1A5R2 | G protein-coupled receptor          | aAAPSGcR                        | Signaling transduction    |
| 8  | D3Z8G3 | Rpgrip1-like                        | vEENmGk                         | Signaling transduction    |
| 9  | F1M1Q8 | EF-hand calcium-binding domain 12   | rEQTAPk                         | Calcium ion binding       |
| 10 | D3ZSF3 | Peptidyl-prolyl cis-trans isomerase | hTGPGILSMANVGPNTNGSGF<br>FicTDk | Protein folding           |
| 11 | G3V614 | KIF-binding protein                 | dAEGPGAQR                       | Embryonic development     |
| 12 | D3ZIG8 | Family with sequence similarity 193 | qREEEEEEEDEEQR                  | Bone development          |
| 13 | B3SVE5 | Neuroprotective protein 8           | qQAGQEQEk                       | Brain formation           |
| 14 | Q9EPI1 | Xylosyltransferase 1                | fVEYVAFSTDDLVTk                 | Proteoglycan biosynthesis |

Note: C: control; Rot: rotenone 1  $\mu$ M; E8: MFG-E8 200  $\mu$ g/mL; the lowercase of peptide sequence means that this is a modification site
